# Supplementary material for: Epigenetic signals that direct cell type–specific interferon beta response in mouse cells
Source: Life Sci Alliance. 2023 Feb 2;6(4):e202201823. doi: 10.26508/lsa.202201823 (PMC9900254; doi:10.26508/lsa.202201823)
Supplement: Supplementary file 5 [file LSA-2022-01823_TableS3.xlsx]

## Sheet: Table S3 content
	Supplementary Table S3. ISGs identified in ESCs, NPCs and MEFs after IFNβ treatment.
	Assignment of cell type specific and common ISGs in ESCs and MEFs. The data refer to Fig. 1, 2, S1, S2 and Table S2.
	Worksheet description
	ISGs_in_ESCs:	Results from DESeq2 differential gene expression analysis in ESCs. Treatment time point versus base line. Column named "index" contains an identify here ENSEML gene ID. The following columns (B to M) are the counts for each conditions. The following columns named, baseMean, lof2FoldChange, lfcSE, stat, pvalue and padj are default DeSeq2 outputs. Column deseq_group contains information about the c…
	ISGs_in_MEFs	Results from DESeq2 differential gene expression analysis in MEFs. The column structures is identicial with the previous entry.
	ISGs_in_NPCs	Results from DESeq2 differential gene expression analysis in NPCs. The column structures is identicial with the previous entry.
	Overlap_ISGs	Table containing all ISGs with ENSEMBL gene ID, gene symbole and three columns with the information if the gene was identified in ESCs, MEFs and NPCs (TRUE/FLASE).
	TPNs_ISGs_ESCs	Normalized read counts (TPMs) for each identified ISG in ESCs. RSEM was used to calculate the counts. The columns gene_id, transcript_id, length and effective_lengths are default outputs from RSEM. Remaining columns contain the TPM values for each sample
	TPNs_ISGs_MEFs	Normalized read counts (TPMs) for each identified ISG in MEFs. RSEM was used to calculate the counts. The columns gene_id, transcript_id, length and effective_lengths are default outputs from RSEM. Remaining columns contain the TPM values for each sample
	TPNs_ISGs_NPCs	Normalized read counts (TPMs) for each identified ISG in NPCs. RSEM was used to calculate the counts. The columns gene_id, transcript_id, length and effective_lengths are default outputs from RSEM. Remaining columns contain the TPM values for each sample

## Sheet: ISGs_in_ESCs
index	ESC_Ola_WT_Rep1_0h	ESC_Ola_WT_Rep1_1h	ESC_Ola_WT_Rep1_6h	ESC_Ola_WT_Rep2_0h	ESC_Ola_WT_Rep2_1h	ESC_Ola_WT_Rep2_6h	ESC_Ola_WT_Rep3_0h	ESC_Ola_WT_Rep3_1h	ESC_Ola_WT_Rep3_6h	ESC_Ola_WT_Rep4_0h	ESC_Ola_WT_Rep4_1h	ESC_Ola_WT_Rep4_6h	baseMean	log2FoldChange	lfcSE	stat	pvalue	padj	deseq_group	ENSEMBL	SYMBOL
ENSMUSG00000000386	3	46	293	8	52	348	4	43	502	3	21	578	154.592	3.35363	0.486682	4.83608	1.32428e-06	0.000628369	1h_vs_0h	ENSMUSG00000000386	Mx1
ENSMUSG00000002325	287	1815	1417	341	1681	1687	547	2500	3281	448	3031	3584	1643.42	2.57791	0.104271	15.1328	9.83926e-52	4.20186e-48	1h_vs_0h	ENSMUSG00000002325	Irf9
ENSMUSG00000018899	789	3989	1128	876	3680	1340	1665	4010	2501	1185	5119	2639	2372.35	2.05707	0.12007	8.80377	1.3229e-18	1.25543e-15	1h_vs_0h	ENSMUSG00000018899	Irf1
ENSMUSG00000020638	16	233	1333	11	198	1663	41	127	3757	32	154	4046	884.843	3.12618	0.340299	6.24798	4.15808e-10	2.84113e-07	1h_vs_0h	ENSMUSG00000020638	Cmpk2
ENSMUSG00000020641	21	186	3838	16	183	4959	23	88	5653	21	123	6366	1781.18	3.03995	0.3647	5.5935	2.22539e-08	1.22392e-05	1h_vs_0h	ENSMUSG00000020641	Rsad2
ENSMUSG00000022906	117	658	3999	153	615	5164	196	809	10011	168	781	11253	2619.29	2.29132	0.16332	7.90669	2.64321e-15	2.37639e-12	1h_vs_0h	ENSMUSG00000022906	Parp9
ENSMUSG00000023341	3	674	1095	2	669	1325	8	933	3064	4	813	3354	928.239	7.67415	0.397339	16.7971	2.56202e-63	2.18822e-59	1h_vs_0h	ENSMUSG00000023341	Mx2
ENSMUSG00000024079	698	1710	4478	705	1747	6117	1083	2940	8306	806	2931	9349	3294.27	1.56979	0.125544	4.53854	5.66464e-06	0.0025464	1h_vs_0h	ENSMUSG00000024079	Eif2ak2
ENSMUSG00000025498	4	484	2922	2	392	3678	8	233	4485	7	293	4825	1440.68	6.33621	0.453847	11.7577	6.44415e-32	1.10079e-28	1h_vs_0h	ENSMUSG00000025498	Irf7
ENSMUSG00000026104	363	3106	12961	401	2908	16122	742	4323	19043	514	4080	21661	7127.41	2.9738	0.133252	14.8125	1.21647e-49	4.15595e-46	1h_vs_0h	ENSMUSG00000026104	Stat1
ENSMUSG00000026896	9	35	579	5	40	792	1	58	2231	0	53	2399	452.803	3.63338	0.501344	5.25264	1.49931e-07	7.31747e-05	1h_vs_0h	ENSMUSG00000026896	Ifih1
ENSMUSG00000027514	21	165	1160	23	152	1253	47	192	4309	32	187	5001	909.191	2.67292	0.295074	5.66948	1.43235e-08	8.15578e-06	1h_vs_0h	ENSMUSG00000027514	Zbp1
ENSMUSG00000027580	61	583	2819	73	569	3283	195	1152	6490	145	1145	7144	1835.23	3.00838	0.177809	11.2952	1.38601e-29	1.82122e-26	1h_vs_0h	ENSMUSG00000027580	Helz2
ENSMUSG00000028268	3	106	1499	12	85	1939	15	177	6675	12	194	7096	1274.15	3.84285	0.372419	7.63347	2.28519e-14	1.95178e-11	1h_vs_0h	ENSMUSG00000028268	Gbp3
ENSMUSG00000029561	11	52	1847	4	64	2199	10	80	4798	4	111	5719	1124.16	3.50134	0.336837	7.42596	1.11963e-13	9.10737e-11	1h_vs_0h	ENSMUSG00000029561	Oasl2
ENSMUSG00000029605	34	461	641	34	416	706	58	607	984	48	510	1022	458.918	3.66256	0.191449	13.9074	5.71344e-44	1.62662e-40	1h_vs_0h	ENSMUSG00000029605	Oas1b
ENSMUSG00000030107	3	470	7462	5	408	9355	5	228	12605	7	265	13471	3611.7	6.34602	0.461583	11.5819	5.08894e-31	7.24411e-28	1h_vs_0h	ENSMUSG00000030107	Usp18
ENSMUSG00000030921	12	139	3175	11	145	4014	17	200	7878	10	149	8743	1879.64	3.80912	0.272058	10.3254	5.40761e-25	6.15818e-22	1h_vs_0h	ENSMUSG00000030921	Trim30a
ENSMUSG00000030966	154	1178	1392	166	1061	1822	293	765	2981	206	785	3079	1137.36	2.43818	0.257354	5.58832	2.29279e-08	1.22392e-05	1h_vs_0h	ENSMUSG00000030966	Trim21
ENSMUSG00000032690	70	442	1604	79	377	1983	121	658	3602	93	628	3844	1061.89	2.64403	0.131688	12.4843	9.09837e-36	1.94273e-32	1h_vs_0h	ENSMUSG00000032690	Oas2
ENSMUSG00000033355	4	349	769	3	332	1058	3	232	1730	1	281	1823	529.397	6.96201	0.50768	11.7436	7.61563e-32	1.18264e-28	1h_vs_0h	ENSMUSG00000033355	Rtp4
ENSMUSG00000034422	69	378	4060	79	345	4788	211	1013	10808	144	876	12357	2653.51	2.49343	0.244176	6.11622	9.58185e-10	6.29528e-07	1h_vs_0h	ENSMUSG00000034422	Parp14
ENSMUSG00000034459	6	433	1684	4	372	2155	9	351	5184	8	412	5752	1237.05	6.04985	0.367064	13.7574	4.59747e-43	1.12191e-39	1h_vs_0h	ENSMUSG00000034459	Ifit1
ENSMUSG00000035517	50	270	1665	49	279	2064	160	457	2852	91	411	3100	926.316	2.20062	0.167113	7.18451	6.74463e-13	5.00921e-10	1h_vs_0h	ENSMUSG00000035517	Tdrd7
ENSMUSG00000035692	2	96	1010	2	108	1417	0	21	1956	1	71	2402	564.749	6.05559	0.855634	5.90859	3.4505e-09	2.10505e-06	1h_vs_0h	ENSMUSG00000035692	Isg15
ENSMUSG00000038037	47	386	323	47	337	498	71	143	572	42	190	604	278.736	2.58902	0.38946	4.08007	4.5023e-05	0.0187581	1h_vs_0h	ENSMUSG00000038037	Socs1
ENSMUSG00000040033	741	2472	4641	870	2582	5724	1985	3343	9043	1117	4003	10302	3735.56	1.56371	0.0972497	5.79652	6.77044e-09	3.98802e-06	1h_vs_0h	ENSMUSG00000040033	Stat2
ENSMUSG00000040253	9	267	2672	15	250	3115	46	407	7773	21	381	8491	1760.32	4.03181	0.254337	11.9205	9.25977e-33	1.7575e-29	1h_vs_0h	ENSMUSG00000040253	Gbp7
ENSMUSG00000040296	763	2493	5929	849	2181	7288	1492	3485	13621	1039	3516	14828	4519.75	1.61223	0.0961266	6.369	1.90261e-10	1.35418e-07	1h_vs_0h	ENSMUSG00000040296	Ddx58
ENSMUSG00000041827	24	1065	3710	39	991	4698	41	408	5602	29	506	5521	1916.23	4.71771	0.405709	9.16348	5.02502e-20	5.04926e-17	1h_vs_0h	ENSMUSG00000041827	Oasl1
ENSMUSG00000046879	111	2858	3842	102	2817	4927	199	3012	9713	150	3651	10862	3339.37	4.61129	0.157881	22.8735	8.53348e-116	1.45769e-111	1h_vs_0h	ENSMUSG00000046879	Irgm1
ENSMUSG00000047735	43	307	398	41	298	517	129	565	2689	88	497	2904	602.709	2.65255	0.377212	4.38095	1.1816e-05	0.00517542	1h_vs_0h	ENSMUSG00000047735	Samd9l
ENSMUSG00000049502	144	860	3164	138	843	3789	287	1206	7955	253	1238	9085	2233.12	2.47737	0.144443	10.228	1.4851e-24	1.58553e-21	1h_vs_0h	ENSMUSG00000049502	Dtx3l
ENSMUSG00000053113	724	2333	644	860	2267	743	1408	8284	2601	1111	11329	2754	2627.62	2.52492	0.35978	4.23849	2.25029e-05	0.00960985	1h_vs_0h	ENSMUSG00000053113	Socs3
ENSMUSG00000053835	3	44	203	2	44	230	1	44	643	3	38	657	144.09	4.39648	0.557406	6.09336	1.10567e-09	6.9952e-07	1h_vs_0h	ENSMUSG00000053835	H2-T24
ENSMUSG00000062007	8	77	218	4	70	261	7	18	321	6	24	345	115.152	3.18557	0.568517	3.84434	0.000120878	0.0491627	1h_vs_0h	ENSMUSG00000062007	Hsh2d
ENSMUSG00000063268	125	581	2567	146	564	2930	352	858	7028	263	982	7508	1820.75	1.91424	0.167041	5.47318	4.42029e-08	2.2208e-05	1h_vs_0h	ENSMUSG00000063268	Parp10
ENSMUSG00000066861	85	439	1047	101	372	1265	128	451	1515	67	367	1517	619.302	2.21912	0.261887	4.65513	3.23771e-06	0.00149477	1h_vs_0h	ENSMUSG00000066861	Oas1g
ENSMUSG00000069874	24	682	1003	27	643	1185	43	613	2155	36	714	2456	769.172	4.52449	0.216579	16.2735	1.52277e-59	8.67063e-56	1h_vs_0h	ENSMUSG00000069874	Irgm2
ENSMUSG00000073144	8	54	58	2	41	73	19	72	151	11	72	137	55.1555	2.73505	0.31083	5.58199	2.37783e-08	1.23085e-05	1h_vs_0h	ENSMUSG00000073144	4930599N23Rik
ENSMUSG00000078853	29	967	2267	22	908	2765	62	476	4493	33	600	4987	1427.69	4.62895	0.333776	10.8724	1.56057e-27	1.90412e-24	1h_vs_0h	ENSMUSG00000078853	Igtp
ENSMUSG00000078922	1	59	99	4	58	135	1	60	211	1	64	259	76.3417	5.25706	0.58181	7.31691	2.53739e-13	1.97017e-10	1h_vs_0h	ENSMUSG00000078922	Tgtp1
ENSMUSG00000000184	64	76	537	100	77	681	281	163	1890	253	248	2346	488.17	2.98494	0.33016	6.01207	1.83173e-09	4.19571e-07	6h_vs_0h	ENSMUSG00000000184	Ccnd2
ENSMUSG00000000204	11	12	59	4	6	58	0	4	153	1	8	177	37.8073	4.48058	0.689102	5.05089	4.39752e-07	8.74089e-05	6h_vs_0h	ENSMUSG00000000204	Slfn4
ENSMUSG00000000386	3	46	293	8	52	348	4	43	502	3	21	578	154.592	6.59065	0.475249	11.7636	6.00938e-32	3.01107e-29	6h_vs_0h	ENSMUSG00000000386	Mx1
ENSMUSG00000001123	18	41	383	30	45	465	77	49	448	55	83	523	185.75	3.55288	0.263536	9.68703	3.42355e-22	1.19333e-19	6h_vs_0h	ENSMUSG00000001123	Lgals9
ENSMUSG00000001750	364	633	2038	450	596	2397	625	636	3922	521	736	4062	1366.73	2.6817	0.146878	11.4496	2.36143e-30	1.09221e-27	6h_vs_0h	ENSMUSG00000001750	Tcirg1
ENSMUSG00000002325	287	1815	1417	341	1681	1687	547	2500	3281	448	3031	3584	1643.42	2.61715	0.104239	15.5139	2.79466e-54	1.86707e-51	6h_vs_0h	ENSMUSG00000002325	Irf9
ENSMUSG00000010358	129	348	1419	135	321	1900	139	226	2618	102	293	2656	842.53	4.05431	0.288837	10.5745	3.91287e-26	1.56847e-23	6h_vs_0h	ENSMUSG00000010358	Ifi35
ENSMUSG00000012519	9	19	94	8	25	102	8	24	209	6	23	178	56.4843	4.24247	0.337866	9.59691	8.23736e-22	2.83024e-19	6h_vs_0h	ENSMUSG00000012519	Mlkl
ENSMUSG00000016206	17	11	70	16	17	70	37	21	141	35	32	129	46.9339	2.02735	0.247824	4.14549	3.39095e-05	0.00622563	6h_vs_0h	ENSMUSG00000016206	H2-M3
ENSMUSG00000016496	12	23	91	12	25	99	29	42	198	24	38	219	63.3149	3.01651	0.238934	8.4396	3.18415e-17	9.45456e-15	6h_vs_0h	ENSMUSG00000016496	Cd274
ENSMUSG00000017830	20	30	409	24	18	527	33	57	628	25	58	646	204.055	4.52546	0.244893	14.3959	5.48962e-47	3.38541e-44	6h_vs_0h	ENSMUSG00000017830	Dhx58
ENSMUSG00000019461	65	153	253	79	136	340	231	197	552	107	193	562	226.56	1.93637	0.172931	5.4147	6.13906e-08	1.29518e-05	6h_vs_0h	ENSMUSG00000019461	Plscr3
ENSMUSG00000020297	28	45	298	25	41	341	34	42	426	21	46	429	148.497	3.85974	0.259736	11.0102	3.41311e-28	1.46587e-25	6h_vs_0h	ENSMUSG00000020297	Nsg2
ENSMUSG00000020638	16	233	1333	11	198	1663	41	127	3757	32	154	4046	884.843	6.78337	0.336471	17.1883	3.24776e-66	2.60373e-63	6h_vs_0h	ENSMUSG00000020638	Cmpk2
ENSMUSG00000020641	21	186	3838	16	183	4959	23	88	5653	21	123	6366	1781.18	8.0584	0.360134	19.5994	1.56477e-85	1.79211e-82	6h_vs_0h	ENSMUSG00000020641	Rsad2
ENSMUSG00000022014	2	6	475	3	5	589	1	25	1615	1	40	1555	319.611	9.14569	0.64778	12.5748	2.90594e-36	1.62536e-33	6h_vs_0h	ENSMUSG00000022014	Epsti1
ENSMUSG00000022245	13	30	39	1	26	43	6	47	168	7	32	155	42.7987	3.73148	0.499219	5.4715	4.46245e-08	9.5827e-06	6h_vs_0h	ENSMUSG00000022245	Skor1
ENSMUSG00000022587	330	507	1643	394	497	2009	911	574	2560	636	689	3026	1112.7	2.15534	0.13717	8.42269	3.67925e-17	1.07914e-14	6h_vs_0h	ENSMUSG00000022587	Ly6e
ENSMUSG00000022906	117	658	3999	153	615	5164	196	809	10011	168	781	11253	2619.29	5.54332	0.161272	28.1717	1.29816e-174	5.20369e-171	6h_vs_0h	ENSMUSG00000022906	Parp9
ENSMUSG00000023341	3	674	1095	2	669	1325	8	933	3064	4	813	3354	928.239	9.01196	0.396814	20.1907	1.18142e-90	1.42071e-87	6h_vs_0h	ENSMUSG00000023341	Mx2
ENSMUSG00000024079	698	1710	4478	705	1747	6117	1083	2940	8306	806	2931	9349	3294.27	3.12223	0.124925	16.988	1.00806e-64	7.57651e-62	6h_vs_0h	ENSMUSG00000024079	Eif2ak2
ENSMUSG00000024308	390	670	2553	445	625	3140	1178	1125	5255	875	1181	5726	1817.29	2.63236	0.140344	11.6311	2.8629e-31	1.37711e-28	6h_vs_0h	ENSMUSG00000024308	Tapbp
ENSMUSG00000024338	3	14	99	7	6	106	8	14	370	5	12	323	71.3641	5.22111	0.426075	9.90696	3.88279e-23	1.41492e-20	6h_vs_0h	ENSMUSG00000024338	Psmb8
ENSMUSG00000024339	10	8	101	9	5	131	18	15	228	7	23	247	62.3989	4.03435	0.296649	10.2287	1.47448e-24	5.62901e-22	6h_vs_0h	ENSMUSG00000024339	Tap2
ENSMUSG00000024371	37	35	131	38	37	158	79	37	234	62	41	236	90.6542	1.89267	0.181764	4.91115	9.05457e-07	0.000178501	6h_vs_0h	ENSMUSG00000024371	C2
ENSMUSG00000025324	124	150	1130	142	155	1325	747	575	2753	487	597	3142	850.584	2.64823	0.382737	4.30642	1.65918e-05	0.00311757	6h_vs_0h	ENSMUSG00000025324	Atp10a
ENSMUSG00000025492	440	837	2029	497	811	2494	1504	728	4492	708	1342	4929	1624.39	2.25712	0.195676	6.4245	1.32301e-10	3.15048e-08	6h_vs_0h	ENSMUSG00000025492	Ifitm3
ENSMUSG00000025498	4	484	2922	2	392	3678	8	233	4485	7	293	4825	1440.68	9.6908	0.452436	19.2089	3.11711e-82	3.40771e-79	6h_vs_0h	ENSMUSG00000025498	Irf7
ENSMUSG00000025647	306	617	1787	384	607	1977	557	462	2085	398	520	2107	1008.97	2.40291	0.26967	5.20231	1.96822e-07	3.97796e-05	6h_vs_0h	ENSMUSG00000025647	Shisa5
ENSMUSG00000026088	441	916	1128	456	816	1368	753	960	2385	549	1006	2474	1068.43	1.75161	0.138911	5.41076	6.27584e-08	1.31252e-05	6h_vs_0h	ENSMUSG00000026088	Mitd1
ENSMUSG00000026104	363	3106	12961	401	2908	16122	742	4323	19043	514	4080	21661	7127.41	5.21578	0.13281	31.7431	3.95996e-221	4.76205e-217	6h_vs_0h	ENSMUSG00000026104	Stat1
ENSMUSG00000026222	14	24	455	12	20	527	8	25	803	4	29	986	231.625	6.18397	0.297743	17.4109	6.8194e-68	5.65564e-65	6h_vs_0h	ENSMUSG00000026222	Sp100
ENSMUSG00000026466	168	297	450	157	281	595	393	476	978	272	461	1099	443.511	1.71586	0.113521	6.30598	2.8638e-10	6.75267e-08	6h_vs_0h	ENSMUSG00000026466	Tor1aip1
ENSMUSG00000026896	9	35	579	5	40	792	1	58	2231	0	53	2399	452.803	8.437	0.490106	15.1743	5.23688e-52	3.31453e-49	6h_vs_0h	ENSMUSG00000026896	Ifih1
ENSMUSG00000026946	10	24	136	18	22	222	25	39	390	9	33	452	105.646	4.26356	0.275487	11.8465	2.24312e-32	1.14786e-29	6h_vs_0h	ENSMUSG00000026946	Nmi
ENSMUSG00000027078	4	18	217	7	15	264	15	13	349	7	15	295	101.524	5.23177	0.342741	12.3468	5.06572e-35	2.76899e-32	6h_vs_0h	ENSMUSG00000027078	Ube2l6
ENSMUSG00000027514	21	165	1160	23	152	1253	47	192	4309	32	187	5001	909.191	6.49263	0.290245	18.9241	7.22067e-80	7.55062e-77	6h_vs_0h	ENSMUSG00000027514	Zbp1
ENSMUSG00000027580	61	583	2819	73	569	3283	195	1152	6490	145	1145	7144	1835.23	5.44567	0.176322	25.2134	2.85446e-140	6.86527e-137	6h_vs_0h	ENSMUSG00000027580	Helz2
ENSMUSG00000027951	1100	2110	4097	1305	1982	4824	2320	3467	8863	1570	3566	9758	3543.09	2.14977	0.0940319	12.2275	2.21776e-34	1.18532e-31	6h_vs_0h	ENSMUSG00000027951	Adar
ENSMUSG00000028037	4	7	135	4	9	199	0	8	335	1	12	375	84.4727	6.84372	0.515694	11.3318	9.13405e-30	4.14496e-27	6h_vs_0h	ENSMUSG00000028037	Ifi44
ENSMUSG00000028268	3	106	1499	12	85	1939	15	177	6675	12	194	7096	1274.15	8.58545	0.367271	20.6535	9.07214e-95	1.14839e-91	6h_vs_0h	ENSMUSG00000028268	Gbp3
ENSMUSG00000028269	9	22	708	15	20	884	86	83	3121	77	102	3461	609.479	5.52829	0.606519	7.46604	8.2646e-14	2.13733e-11	6h_vs_0h	ENSMUSG00000028269	NA
ENSMUSG00000028270	14	23	812	19	29	973	88	81	2871	49	122	3012	590.843	5.57819	0.391577	11.6917	1.40583e-31	6.90035e-29	6h_vs_0h	ENSMUSG00000028270	Gbp2
ENSMUSG00000029298	21	30	293	20	35	387	42	107	1023	31	99	1067	233.566	4.55391	0.308127	11.5339	8.90014e-31	4.1972e-28	6h_vs_0h	ENSMUSG00000029298	Gbp9
ENSMUSG00000029561	11	52	1847	4	64	2199	10	80	4798	4	111	5719	1124.16	8.93377	0.326437	24.3041	1.77334e-130	3.55422e-127	6h_vs_0h	ENSMUSG00000029561	Oasl2
ENSMUSG00000029605	34	461	641	34	416	706	58	607	984	48	510	1022	458.918	4.35532	0.190385	17.6239	1.61462e-69	1.43827e-66	6h_vs_0h	ENSMUSG00000029605	Oas1b
ENSMUSG00000029798	48	38	206	45	60	279	117	108	736	72	102	835	195.873	2.83731	0.263912	6.96185	3.35838e-12	8.32705e-10	6h_vs_0h	ENSMUSG00000029798	Herc6
ENSMUSG00000029826	2086	2871	4438	2215	2954	5510	3987	4054	8552	3110	4440	9454	4297.05	1.33703	0.0636072	5.29862	1.1668e-07	2.37819e-05	6h_vs_0h	ENSMUSG00000029826	Zc3hav1
ENSMUSG00000030107	3	470	7462	5	408	9355	5	228	12605	7	265	13471	3611.7	11.1325	0.460078	22.0234	1.71689e-107	2.75285e-104	6h_vs_0h	ENSMUSG00000030107	Usp18
ENSMUSG00000030157	14	44	47	21	54	57	27	26	143	20	58	170	53.2626	2.2792	0.352584	3.62806	0.000285563	0.0490577	6h_vs_0h	ENSMUSG00000030157	Clec2d
ENSMUSG00000030921	12	139	3175	11	145	4014	17	200	7878	10	149	8743	1879.64	8.88302	0.266049	29.63	6.14226e-193	2.95455e-189	6h_vs_0h	ENSMUSG00000030921	Trim30a
ENSMUSG00000030966	154	1178	1392	166	1061	1822	293	765	2981	206	785	3079	1137.36	3.52955	0.256808	9.84997	6.85665e-23	2.46133e-20	6h_vs_0h	ENSMUSG00000030966	Trim21
ENSMUSG00000031639	6	7	62	2	4	56	14	13	142	5	18	172	37.8343	4.02842	0.40991	7.388	1.49051e-13	3.81364e-11	6h_vs_0h	ENSMUSG00000031639	Tlr3
ENSMUSG00000031897	198	264	1015	225	236	1170	309	202	2043	220	263	2033	656.509	2.71465	0.20248	8.46824	2.49124e-17	7.48961e-15	6h_vs_0h	ENSMUSG00000031897	Psmb10
ENSMUSG00000032128	13	26	153	12	14	190	28	18	269	13	18	316	85.9308	3.88687	0.262022	11.0177	3.14055e-28	1.37333e-25	6h_vs_0h	ENSMUSG00000032128	Robo3
ENSMUSG00000032420	7	21	78	8	18	93	6	4	84	6	6	84	36.6787	3.73044	0.584585	4.67073	3.00127e-06	0.000586859	6h_vs_0h	ENSMUSG00000032420	Nt5e
ENSMUSG00000032508	78	189	206	78	158	290	138	112	458	95	199	514	202.642	1.9288	0.230769	4.0248	5.70228e-05	0.0102347	6h_vs_0h	ENSMUSG00000032508	Myd88
ENSMUSG00000032596	15	58	696	12	44	783	25	95	2474	28	126	2416	497.957	6.249	0.298351	17.5934	2.76949e-69	2.37889e-66	6h_vs_0h	ENSMUSG00000032596	Uba7
ENSMUSG00000032661	91	112	1134	114	114	1418	164	123	1339	79	97	1371	527.611	3.67899	0.283107	9.46282	2.9974e-21	1.01536e-18	6h_vs_0h	ENSMUSG00000032661	Oas3
ENSMUSG00000032690	70	442	1604	79	377	1983	121	658	3602	93	628	3844	1061.89	4.93524	0.128546	30.6133	8.13337e-206	6.52052e-202	6h_vs_0h	ENSMUSG00000032690	Oas2
ENSMUSG00000032698	21	51	144	36	44	187	30	22	178	21	24	202	82.5007	2.77131	0.42203	4.19713	2.70321e-05	0.00500116	6h_vs_0h	ENSMUSG00000032698	Lmo2
ENSMUSG00000033355	4	349	769	3	332	1058	3	232	1730	1	281	1823	529.397	8.94215	0.506431	15.6826	1.98936e-55	1.36703e-52	6h_vs_0h	ENSMUSG00000033355	Rtp4
ENSMUSG00000033880	6	30	347	8	31	419	30	79	1152	16	77	1251	254.17	5.74034	0.331694	14.2913	2.47928e-46	1.49073e-43	6h_vs_0h	ENSMUSG00000033880	Lgals3bp
ENSMUSG00000034422	69	378	4060	79	345	4788	211	1013	10808	144	876	12357	2653.51	6.02919	0.242535	20.7359	1.64223e-95	2.1943e-92	6h_vs_0h	ENSMUSG00000034422	Parp14
ENSMUSG00000034459	6	433	1684	4	372	2155	9	351	5184	8	412	5752	1237.05	9.05184	0.365483	22.0307	1.46353e-107	2.51423e-104	6h_vs_0h	ENSMUSG00000034459	Ifit1
ENSMUSG00000035517	50	270	1665	49	279	2064	160	457	2852	91	411	3100	926.316	4.9273	0.163187	24.0663	5.63951e-128	1.04335e-124	6h_vs_0h	ENSMUSG00000035517	Tdrd7
ENSMUSG00000035692	2	96	1010	2	108	1417	0	21	1956	1	71	2402	564.749	10.3364	0.851981	10.9585	6.05052e-28	2.553e-25	6h_vs_0h	ENSMUSG00000035692	Isg15
ENSMUSG00000035929	56	115	320	64	98	407	100	160	585	125	171	590	225.435	2.52636	0.168994	9.03204	1.68503e-19	5.55159e-17	6h_vs_0h	ENSMUSG00000035929	H2-Q4
ENSMUSG00000036249	46	110	289	73	92	365	130	77	616	86	102	717	213.491	2.61398	0.212463	7.59654	3.04162e-14	8.31295e-12	6h_vs_0h	ENSMUSG00000036249	Rbm43
ENSMUSG00000036461	279	418	671	318	369	813	617	559	1482	541	605	1598	651.299	1.41674	0.105098	3.96525	7.33194e-05	0.0129662	6h_vs_0h	ENSMUSG00000036461	Elf1
ENSMUSG00000037034	4	11	24	3	7	38	5	2	88	4	9	94	21.8831	3.871	0.525232	5.46614	4.59934e-08	9.78926e-06	6h_vs_0h	ENSMUSG00000037034	Pax1
ENSMUSG00000037321	88	245	1170	97	227	1429	288	281	2367	168	361	2323	719.51	3.62485	0.145005	18.1017	3.08757e-73	2.97036e-70	6h_vs_0h	ENSMUSG00000037321	Tap1
ENSMUSG00000037580	66	98	275	68	85	365	103	55	321	70	92	317	164.489	2.18899	0.312881	3.80013	0.000144623	0.0253892	6h_vs_0h	ENSMUSG00000037580	Gch1
ENSMUSG00000037921	132	300	3787	115	275	4683	269	392	8525	211	349	8919	2185.12	5.19497	0.130561	32.1303	1.66352e-226	4.00093e-222	6h_vs_0h	ENSMUSG00000037921	Ddx60
ENSMUSG00000038037	47	386	323	47	337	498	71	143	572	42	190	604	278.736	3.31154	0.388532	5.94943	2.69075e-09	6.04816e-07	6h_vs_0h	ENSMUSG00000038037	Socs1
ENSMUSG00000038507	274	875	5318	327	738	6734	646	1202	14044	486	1190	14961	3590.17	4.57545	0.127926	27.9493	6.71871e-172	2.30845e-168	6h_vs_0h	ENSMUSG00000038507	Parp12
ENSMUSG00000038623	14	26	123	11	19	145	66	59	269	67	61	253	86.029	2.48619	0.366351	4.05673	4.97644e-05	0.00899912	6h_vs_0h	ENSMUSG00000038623	Tm6sf1
ENSMUSG00000038774	1969	2344	4775	2130	2331	5937	4345	4550	10611	3396	4114	11907	4568.54	1.52441	0.118871	4.41158	1.02618e-05	0.00194336	6h_vs_0h	ENSMUSG00000038774	Ascc3
ENSMUSG00000038884	252	489	1001	339	446	1227	717	753	1865	559	780	1977	828.476	1.80106	0.117473	6.81915	9.15823e-12	2.2476e-09	6h_vs_0h	ENSMUSG00000038884	A230050P20Rik
ENSMUSG00000039236	5	7	95	4	8	103	30	30	150	14	28	131	48.7834	3.41038	0.409892	5.88053	4.08947e-09	9.02347e-07	6h_vs_0h	ENSMUSG00000039236	Isg20
ENSMUSG00000039853	20	58	158	13	61	207	35	57	371	21	53	331	110.938	3.6305	0.252923	10.4004	2.46957e-25	9.57992e-23	6h_vs_0h	ENSMUSG00000039853	Trim14
ENSMUSG00000040033	741	2472	4641	870	2582	5724	1985	3343	9043	1117	4003	10302	3735.56	2.73914	0.0967483	17.9759	3.00739e-72	2.78195e-69	6h_vs_0h	ENSMUSG00000040033	Stat2
ENSMUSG00000040253	9	267	2672	15	250	3115	46	407	7773	21	381	8491	1760.32	7.94604	0.251272	27.6436	3.33503e-168	1.00263e-164	6h_vs_0h	ENSMUSG00000040253	Gbp7
ENSMUSG00000040296	763	2493	5929	849	2181	7288	1492	3485	13621	1039	3516	14828	4519.75	3.33522	0.095451	24.4651	3.47557e-132	7.59917e-129	6h_vs_0h	ENSMUSG00000040296	Ddx58
ENSMUSG00000040483	547	973	3547	608	1026	4121	588	1159	6991	382	1036	7318	2281.74	3.28916	0.256142	8.93707	3.99633e-19	1.29886e-16	6h_vs_0h	ENSMUSG00000040483	Xaf1
ENSMUSG00000041827	24	1065	3710	39	991	4698	41	408	5602	29	506	5521	1916.23	7.25738	0.405045	15.4486	7.70907e-54	5.0111e-51	6h_vs_0h	ENSMUSG00000041827	Oasl1
ENSMUSG00000043279	216	755	1574	283	771	1835	781	1310	3467	571	1123	4079	1307.88	2.65906	0.182794	9.07609	1.12542e-19	3.75938e-17	6h_vs_0h	ENSMUSG00000043279	Trim56
ENSMUSG00000045932	30	44	236	39	40	300	111	108	605	83	131	671	182.14	2.85247	0.259743	7.13195	9.89582e-13	2.50531e-10	6h_vs_0h	ENSMUSG00000045932	Ifit2
ENSMUSG00000046718	378	1276	4483	375	1166	5831	654	1049	10577	517	1239	11151	3048.26	4.05435	0.183154	16.6764	1.9453e-62	1.41777e-59	6h_vs_0h	ENSMUSG00000046718	Bst2
ENSMUSG00000046805	5	11	51	0	9	76	3	27	140	1	27	234	43.3752	5.72391	0.586971	8.04795	8.41946e-16	2.38231e-13	6h_vs_0h	ENSMUSG00000046805	Mpeg1
ENSMUSG00000046879	111	2858	3842	102	2817	4927	199	3012	9713	150	3651	10862	3339.37	5.69499	0.157594	29.7917	5.00406e-195	3.00882e-191	6h_vs_0h	ENSMUSG00000046879	Irgm1
ENSMUSG00000047735	43	307	398	41	298	517	129	565	2689	88	497	2904	602.709	4.34166	0.376004	8.88731	6.26051e-19	1.9812e-16	6h_vs_0h	ENSMUSG00000047735	Samd9l
ENSMUSG00000048782	16	17	99	13	15	116	13	14	149	10	5	137	50.9655	3.28939	0.415492	5.51008	3.58667e-08	7.77143e-06	6h_vs_0h	ENSMUSG00000048782	Insc
ENSMUSG00000048988	6	3	23	6	4	28	3	7	58	3	4	67	16.5005	3.20684	0.487673	4.52525	6.03248e-06	0.00115148	6h_vs_0h	ENSMUSG00000048988	Elfn1
ENSMUSG00000049401	510	1070	1450	502	896	1874	737	880	2872	593	1118	3007	1263.06	1.97564	0.180694	5.39939	6.68693e-08	1.38644e-05	6h_vs_0h	ENSMUSG00000049401	Ogfr
ENSMUSG00000049502	144	860	3164	138	843	3789	287	1206	7955	253	1238	9085	2233.12	4.86436	0.142979	27.0274	7.04823e-161	1.88352e-157	6h_vs_0h	ENSMUSG00000049502	Dtx3l
ENSMUSG00000052776	124	367	1302	151	277	1546	184	297	2202	171	400	2281	761.116	3.57102	0.19088	13.4693	2.37147e-41	1.39113e-38	6h_vs_0h	ENSMUSG00000052776	Oas1a
ENSMUSG00000053835	3	44	203	2	44	230	1	44	643	3	38	657	144.09	7.51791	0.547682	11.9009	1.17076e-32	6.12129e-30	6h_vs_0h	ENSMUSG00000053835	H2-T24
ENSMUSG00000054072	1	2	48	1	8	81	1	13	268	1	6	291	51.0735	7.29633	0.834096	7.54869	4.39648e-14	1.17488e-11	6h_vs_0h	ENSMUSG00000054072	Iigp1
ENSMUSG00000054404	42	168	1539	37	166	1878	38	65	1736	36	77	2117	677.743	5.61046	0.425864	10.8261	2.58841e-27	1.05515e-24	6h_vs_0h	ENSMUSG00000054404	Slfn5
ENSMUSG00000056116	28	85	431	33	65	554	56	56	740	50	85	760	240.539	3.97919	0.221279	13.4635	2.56482e-41	1.46873e-38	6h_vs_0h	ENSMUSG00000056116	H2-T22
ENSMUSG00000056144	40	93	178	32	87	184	57	134	278	40	122	292	126.112	2.52595	0.191442	7.9708	1.5765e-15	4.35821e-13	6h_vs_0h	ENSMUSG00000056144	Trim34a
ENSMUSG00000057143	332	632	980	385	564	1189	906	1128	2505	753	1100	2760	1021.14	1.68534	0.167676	4.08729	4.3645e-05	0.00795231	6h_vs_0h	ENSMUSG00000057143	Trim12c
ENSMUSG00000057346	1	3	40	0	0	71	0	2	130	0	3	119	28.2402	8.15808	1.06174	6.74186	1.56375e-11	3.79897e-09	6h_vs_0h	ENSMUSG00000057346	Apol9a
ENSMUSG00000057554	156	419	1087	198	369	1400	340	424	1557	251	466	1798	700.806	2.73952	0.170849	10.1816	2.3953e-24	9.00145e-22	6h_vs_0h	ENSMUSG00000057554	Lgals8
ENSMUSG00000057596	6	4	68	2	5	93	2	1	162	2	7	178	41.3344	5.36379	0.489377	8.91704	4.78936e-19	1.53585e-16	6h_vs_0h	ENSMUSG00000057596	Trim30d
ENSMUSG00000060519	837	1683	2662	1004	1476	3163	1688	1414	4170	1293	1722	4727	2120.2	1.69018	0.172886	3.99209	6.54939e-05	0.0116681	6h_vs_0h	ENSMUSG00000060519	Tor3a
ENSMUSG00000060802	168	280	1165	206	244	1691	397	226	1533	278	265	1610	679.248	2.68343	0.236629	7.11423	1.12542e-12	2.81953e-10	6h_vs_0h	ENSMUSG00000060802	B2m
ENSMUSG00000061232	203	308	1070	212	268	1243	517	333	1632	361	405	1612	667.109	2.25231	0.153573	8.15449	3.50659e-16	1.01611e-13	6h_vs_0h	ENSMUSG00000061232	H2-K1
ENSMUSG00000062007	8	77	218	4	70	261	7	18	321	6	24	345	115.152	5.56492	0.5614	8.13132	4.24625e-16	1.21579e-13	6h_vs_0h	ENSMUSG00000062007	Hsh2d
ENSMUSG00000062488	0	0	82	0	4	144	0	2	302	0	2	329	64.1189	10.084	1.06222	8.55191	1.21071e-17	3.73319e-15	6h_vs_0h	ENSMUSG00000062488	Ifit3b
ENSMUSG00000063268	125	581	2567	146	564	2930	352	858	7028	263	982	7508	1820.75	4.5215	0.165198	21.3168	7.93347e-101	1.1224e-97	6h_vs_0h	ENSMUSG00000063268	Parp10
ENSMUSG00000064215	14	67	451	18	47	523	31	99	1636	20	119	1531	336.901	5.58267	0.281979	16.2518	2.16939e-59	1.53458e-56	6h_vs_0h	ENSMUSG00000064215	Ifi27
ENSMUSG00000066861	85	439	1047	101	372	1265	128	451	1515	67	367	1517	619.302	3.86738	0.260224	11.0189	3.09777e-28	1.37333e-25	6h_vs_0h	ENSMUSG00000066861	Oas1g
ENSMUSG00000067212	6	19	57	4	27	95	1	3	148	0	6	122	39.9866	5.07102	0.795946	5.1147	3.14241e-07	6.29817e-05	6h_vs_0h	ENSMUSG00000067212	H2-T23
ENSMUSG00000067297	1	5	44	1	4	60	6	6	101	0	6	111	26.8676	5.36359	0.575904	7.57694	3.53804e-14	9.56106e-12	6h_vs_0h	ENSMUSG00000067297	Ifit1bl2
ENSMUSG00000068246	0	4	102	1	5	111	0	10	204	1	6	218	52.1459	8.32227	0.97215	7.53204	4.99531e-14	1.30589e-11	6h_vs_0h	ENSMUSG00000068246	Apol9b
ENSMUSG00000069874	24	682	1003	27	643	1185	43	613	2155	36	714	2456	769.172	5.71953	0.215555	21.8947	2.91548e-106	4.38251e-103	6h_vs_0h	ENSMUSG00000069874	Irgm2
ENSMUSG00000070327	1887	4121	42765	2545	4131	49835	5698	9894	93629	4360	8670	103854	25724.6	4.39704	0.186191	18.2449	2.27073e-74	2.27556e-71	6h_vs_0h	ENSMUSG00000070327	Rnf213
ENSMUSG00000073144	8	54	58	2	41	73	19	72	151	11	72	137	55.1555	3.44171	0.305125	8.00233	1.22082e-15	3.41418e-13	6h_vs_0h	ENSMUSG00000073144	4930599N23Rik
ENSMUSG00000073411	266	492	2234	282	454	2521	439	419	3288	406	536	3274	1213.72	3.10831	0.193839	10.8766	1.49008e-27	6.17895e-25	6h_vs_0h	ENSMUSG00000073411	H2-D1
ENSMUSG00000073555	3	2	26	3	4	51	0	2	124	1	3	128	25.5023	5.39217	0.674409	6.51262	7.38516e-11	1.7762e-08	6h_vs_0h	ENSMUSG00000073555	Gm4951
ENSMUSG00000073929	0	0	7	0	0	6	0	0	17	0	0	15	3.45234	5.88444	1.29169	3.78143	0.000155927	0.0271754	6h_vs_0h	ENSMUSG00000073929	Trim30e-ps1
ENSMUSG00000074000	2	8	27	4	10	36	0	13	59	5	15	58	19.0211	4.03712	0.521105	5.82824	5.60165e-09	1.22478e-06	6h_vs_0h	ENSMUSG00000074000	NA
ENSMUSG00000074896	3	8	224	1	5	251	0	0	831	0	5	915	162.237	8.82666	1.03768	7.54249	4.61079e-14	1.21862e-11	6h_vs_0h	ENSMUSG00000074896	Ifit3
ENSMUSG00000075602	11	29	131	16	21	182	32	34	380	33	33	372	97.6573	3.54883	0.243064	10.4862	9.99309e-26	3.94006e-23	6h_vs_0h	ENSMUSG00000075602	Ly6a
ENSMUSG00000078349	3	13	73	3	11	75	4	13	112	3	9	129	36.6456	4.97205	0.465906	8.52543	1.52243e-17	4.63492e-15	6h_vs_0h	ENSMUSG00000078349	NA
ENSMUSG00000078853	29	967	2267	22	908	2765	62	476	4493	33	600	4987	1427.69	6.7054	0.333011	17.1328	8.4516e-66	6.55708e-63	6h_vs_0h	ENSMUSG00000078853	Igtp
ENSMUSG00000078920	4	6	117	1	16	153	2	12	355	0	10	354	78.1072	7.08505	0.608059	10.0073	1.41517e-23	5.23634e-21	6h_vs_0h	ENSMUSG00000078920	Ifi47
ENSMUSG00000078921	0	1	26	0	2	27	0	4	66	0	2	49	13.8309	7.8048	1.08474	6.27324	3.53622e-10	8.25724e-08	6h_vs_0h	ENSMUSG00000078921	Tgtp2
ENSMUSG00000078922	1	59	99	4	58	135	1	60	211	1	64	259	76.3417	6.67009	0.577138	9.8245	8.83087e-23	3.1234e-20	6h_vs_0h	ENSMUSG00000078922	Tgtp1
ENSMUSG00000079197	291	422	726	282	371	896	584	428	1691	386	629	1773	667.656	1.74385	0.124242	5.98713	2.13581e-09	4.84607e-07	6h_vs_0h	ENSMUSG00000079197	Psme2
ENSMUSG00000079362	2	2	11	2	3	14	2	5	59	0	0	73	12.251	4.52379	0.836401	4.21303	2.51963e-05	0.00469764	6h_vs_0h	ENSMUSG00000079362	NA
ENSMUSG00000079363	47	96	371	38	103	473	133	250	1408	93	277	1501	351.963	3.58858	0.298977	8.65812	4.79601e-18	1.49804e-15	6h_vs_0h	ENSMUSG00000079363	Gbp4
ENSMUSG00000079491	0	10	16	5	6	38	1	4	49	3	3	65	15.7313	4.16011	0.690662	4.57547	4.75148e-06	0.000914222	6h_vs_0h	ENSMUSG00000079491	H2-T10
ENSMUSG00000086281	33	109	246	28	84	274	71	58	343	48	56	381	144.808	2.92409	0.326151	5.89938	3.64875e-09	8.12557e-07	6h_vs_0h	ENSMUSG00000086281	NA
ENSMUSG00000087477	0	21	72	1	22	104	1	5	89	0	5	99	36.5154	7.64557	1.10405	6.01928	1.75192e-09	4.05148e-07	6h_vs_0h	ENSMUSG00000087477	NA
ENSMUSG00000090215	9	32	60	5	28	62	21	34	86	19	19	58	36.7397	2.48918	0.402946	3.69574	0.000219246	0.0379359	6h_vs_0h	ENSMUSG00000090215	Trim34b
ENSMUSG00000091199	2	2	10	1	1	16	0	1	23	0	0	22	6.34472	4.53582	0.975898	3.62314	0.000291049	0.0496455	6h_vs_0h	ENSMUSG00000091199	NA
ENSMUSG00000091302	79	200	245	115	220	294	164	243	548	112	292	552	245.776	1.8176	0.151516	5.39614	6.80885e-08	1.39965e-05	6h_vs_0h	ENSMUSG00000091302	NA
ENSMUSG00000091549	91	135	237	78	140	293	130	256	407	94	235	390	202.727	1.80913	0.176499	4.58434	4.55422e-06	0.000883335	6h_vs_0h	ENSMUSG00000091549	NA
ENSMUSG00000000184	64	76	537	100	77	681	281	163	1890	253	248	2346	488.17	3.15301	0.331112	6.50236	7.90701e-11	2.73657e-08	6h_vs_1h	ENSMUSG00000000184	Ccnd2
ENSMUSG00000000204	11	12	59	4	6	58	0	4	153	1	8	177	37.8073	3.66299	0.656432	4.05676	4.97571e-05	0.0123834	6h_vs_1h	ENSMUSG00000000204	Slfn4
ENSMUSG00000000386	3	46	293	8	52	348	4	43	502	3	21	578	154.592	3.23702	0.352135	6.35275	2.11501e-10	7.0981e-08	6h_vs_1h	ENSMUSG00000000386	Mx1
ENSMUSG00000001123	18	41	383	30	45	465	77	49	448	55	83	523	185.75	3.09373	0.257981	8.11583	4.82488e-16	2.32329e-13	6h_vs_1h	ENSMUSG00000001123	Lgals9
ENSMUSG00000001750	364	633	2038	450	596	2397	625	636	3922	521	736	4062	1366.73	2.14371	0.145837	7.84242	4.41941e-15	2.08277e-12	6h_vs_1h	ENSMUSG00000001750	Tcirg1
ENSMUSG00000010358	129	348	1419	135	321	1900	139	226	2618	102	293	2656	842.53	2.71255	0.284654	6.01624	1.78519e-09	5.56929e-07	6h_vs_1h	ENSMUSG00000010358	Ifi35
ENSMUSG00000012519	9	19	94	8	25	102	8	24	209	6	23	178	56.4843	2.56918	0.264948	5.92258	3.16933e-09	9.75009e-07	6h_vs_1h	ENSMUSG00000012519	Mlkl
ENSMUSG00000016206	17	11	70	16	17	70	37	21	141	35	32	129	46.9339	2.28025	0.259009	4.94288	7.6975e-07	0.000215822	6h_vs_1h	ENSMUSG00000016206	H2-M3
ENSMUSG00000016496	12	23	91	12	25	99	29	42	198	24	38	219	63.3149	2.14742	0.213769	5.36758	7.98011e-08	2.32578e-05	6h_vs_1h	ENSMUSG00000016496	Cd274
ENSMUSG00000017830	20	30	409	24	18	527	33	57	628	25	58	646	204.055	3.78575	0.229198	12.1543	5.44193e-34	1.09581e-30	6h_vs_1h	ENSMUSG00000017830	Dhx58
ENSMUSG00000020297	28	45	298	25	41	341	34	42	426	21	46	429	148.497	3.05633	0.244851	8.39827	4.53121e-17	2.28105e-14	6h_vs_1h	ENSMUSG00000020297	Nsg2
ENSMUSG00000020638	16	233	1333	11	198	1663	41	127	3757	32	154	4046	884.843	3.65719	0.30528	8.70411	3.20082e-18	1.77245e-15	6h_vs_1h	ENSMUSG00000020638	Cmpk2
ENSMUSG00000020641	21	186	3838	16	183	4959	23	88	5653	21	123	6366	1781.18	5.01845	0.32712	12.2843	1.09975e-34	2.43594e-31	6h_vs_1h	ENSMUSG00000020641	Rsad2
ENSMUSG00000022014	2	6	475	3	5	589	1	25	1615	1	40	1555	319.611	5.75113	0.398555	11.9209	9.21022e-33	1.36004e-29	6h_vs_1h	ENSMUSG00000022014	Epsti1
ENSMUSG00000022587	330	507	1643	394	497	2009	911	574	2560	636	689	3026	1112.7	1.96474	0.136887	7.04769	1.81916e-12	7.19543e-10	6h_vs_1h	ENSMUSG00000022587	Ly6e
ENSMUSG00000022906	117	658	3999	153	615	5164	196	809	10011	168	781	11253	2619.29	3.252	0.152784	14.7398	3.57916e-49	1.32131e-45	6h_vs_1h	ENSMUSG00000022906	Parp9
ENSMUSG00000024079	698	1710	4478	705	1747	6117	1083	2940	8306	806	2931	9349	3294.27	1.55244	0.123206	4.48388	7.32972e-06	0.00193278	6h_vs_1h	ENSMUSG00000024079	Eif2ak2
ENSMUSG00000024308	390	670	2553	445	625	3140	1178	1125	5255	875	1181	5726	1817.29	2.14653	0.139625	8.21147	2.18498e-16	1.0755e-13	6h_vs_1h	ENSMUSG00000024308	Tapbp
ENSMUSG00000024338	3	14	99	7	6	106	8	14	370	5	12	323	71.3641	4.0924	0.367451	8.41583	3.90127e-17	2.00961e-14	6h_vs_1h	ENSMUSG00000024338	Psmb8
ENSMUSG00000024339	10	8	101	9	5	131	18	15	228	7	23	247	62.3989	3.72887	0.286231	9.53378	1.51652e-21	1.04972e-18	6h_vs_1h	ENSMUSG00000024339	Tap2
ENSMUSG00000024371	37	35	131	38	37	158	79	37	234	62	41	236	90.6542	2.26398	0.191988	6.58364	4.59082e-11	1.61407e-08	6h_vs_1h	ENSMUSG00000024371	C2
ENSMUSG00000025324	124	150	1130	142	155	1325	747	575	2753	487	597	3142	850.584	2.48938	0.382608	3.8927	9.91337e-05	0.0236109	6h_vs_1h	ENSMUSG00000025324	Atp10a
ENSMUSG00000025492	440	837	2029	497	811	2494	1504	728	4492	708	1342	4929	1624.39	1.78664	0.195208	4.02976	5.58349e-05	0.0137416	6h_vs_1h	ENSMUSG00000025492	Ifitm3
ENSMUSG00000025498	4	484	2922	2	392	3678	8	233	4485	7	293	4825	1440.68	3.35459	0.320806	7.3396	2.14227e-13	8.62752e-11	6h_vs_1h	ENSMUSG00000025498	Irf7
ENSMUSG00000026104	363	3106	12961	401	2908	16122	742	4323	19043	514	4080	21661	7127.41	2.24199	0.129151	9.61654	6.80829e-22	5.02679e-19	6h_vs_1h	ENSMUSG00000026104	Stat1
ENSMUSG00000026222	14	24	455	12	20	527	8	25	803	4	29	986	231.625	4.73591	0.237551	15.7268	9.91363e-56	4.39174e-52	6h_vs_1h	ENSMUSG00000026222	Sp100
ENSMUSG00000026896	9	35	579	5	40	792	1	58	2231	0	53	2399	452.803	4.80362	0.349337	10.8881	1.31366e-27	1.53145e-24	6h_vs_1h	ENSMUSG00000026896	Ifih1
ENSMUSG00000026946	10	24	136	18	22	222	25	39	390	9	33	452	105.646	3.213	0.243783	9.07774	1.10848e-19	7.0151e-17	6h_vs_1h	ENSMUSG00000026946	Nmi
ENSMUSG00000027078	4	18	217	7	15	264	15	13	349	7	15	295	101.524	4.161	0.292983	10.789	3.87874e-27	4.09115e-24	6h_vs_1h	ENSMUSG00000027078	Ube2l6
ENSMUSG00000027514	21	165	1160	23	152	1253	47	192	4309	32	187	5001	909.191	3.81972	0.263177	10.7141	8.73788e-27	8.79746e-24	6h_vs_1h	ENSMUSG00000027514	Zbp1
ENSMUSG00000027580	61	583	2819	73	569	3283	195	1152	6490	145	1145	7144	1835.23	2.43729	0.163951	8.76657	1.84195e-18	1.07366e-15	6h_vs_1h	ENSMUSG00000027580	Helz2
ENSMUSG00000028037	4	7	135	4	9	199	0	8	335	1	12	375	84.4727	4.74467	0.311176	12.0339	2.3568e-33	4.01562e-30	6h_vs_1h	ENSMUSG00000028037	Ifi44
ENSMUSG00000028268	3	106	1499	12	85	1939	15	177	6675	12	194	7096	1274.15	4.7426	0.295007	12.6864	7.03017e-37	1.7302e-33	6h_vs_1h	ENSMUSG00000028268	Gbp3
ENSMUSG00000028269	9	22	708	15	20	884	86	83	3121	77	102	3461	609.479	5.07349	0.603903	6.74527	1.5274e-11	5.73422e-09	6h_vs_1h	ENSMUSG00000028269	NA
ENSMUSG00000028270	14	23	812	19	29	973	88	81	2871	49	122	3012	590.843	4.83977	0.384727	9.9805	1.8553e-23	1.46767e-20	6h_vs_1h	ENSMUSG00000028270	Gbp2
ENSMUSG00000029298	21	30	293	20	35	387	42	107	1023	31	99	1067	233.566	3.25242	0.289789	7.77261	7.68859e-15	3.47556e-12	6h_vs_1h	ENSMUSG00000029298	Gbp9
ENSMUSG00000029561	11	52	1847	4	64	2199	10	80	4798	4	111	5719	1124.16	5.43243	0.203911	21.7371	9.14796e-105	6.75424e-101	6h_vs_1h	ENSMUSG00000029561	Oasl2
ENSMUSG00000029798	48	38	206	45	60	279	117	108	736	72	102	835	195.873	2.58451	0.262199	6.04314	1.51146e-09	4.7827e-07	6h_vs_1h	ENSMUSG00000029798	Herc6
ENSMUSG00000030107	3	470	7462	5	408	9355	5	228	12605	7	265	13471	3611.7	4.78648	0.328017	11.5436	7.95623e-31	9.79058e-28	6h_vs_1h	ENSMUSG00000030107	Usp18
ENSMUSG00000030921	12	139	3175	11	145	4014	17	200	7878	10	149	8743	1879.64	5.0739	0.178878	22.7747	8.16163e-115	9.039e-111	6h_vs_1h	ENSMUSG00000030921	Trim30a
ENSMUSG00000031639	6	7	62	2	4	56	14	13	142	5	18	172	37.8343	3.26943	0.372357	6.09476	1.09604e-09	3.51843e-07	6h_vs_1h	ENSMUSG00000031639	Tlr3
ENSMUSG00000031897	198	264	1015	225	236	1170	309	202	2043	220	263	2033	656.509	2.55836	0.202178	7.70786	1.27943e-14	5.55676e-12	6h_vs_1h	ENSMUSG00000031897	Psmb10
ENSMUSG00000032128	13	26	153	12	14	190	28	18	269	13	18	316	85.9308	3.51843	0.25154	10.012	1.34937e-23	1.10698e-20	6h_vs_1h	ENSMUSG00000032128	Robo3
ENSMUSG00000032596	15	58	696	12	44	783	25	95	2474	28	126	2416	497.957	4.16176	0.262234	12.057	1.78154e-33	3.28843e-30	6h_vs_1h	ENSMUSG00000032596	Uba7
ENSMUSG00000032661	91	112	1134	114	114	1418	164	123	1339	79	97	1371	527.611	3.53673	0.282726	8.97238	2.90183e-19	1.78543e-16	6h_vs_1h	ENSMUSG00000032661	Oas3
ENSMUSG00000032690	70	442	1604	79	377	1983	121	658	3602	93	628	3844	1061.89	2.29121	0.107929	11.9635	5.52172e-33	8.73615e-30	6h_vs_1h	ENSMUSG00000032690	Oas2
ENSMUSG00000033880	6	30	347	8	31	419	30	79	1152	16	77	1251	254.17	3.74182	0.286895	9.55686	1.21379e-21	8.6727e-19	6h_vs_1h	ENSMUSG00000033880	Lgals3bp
ENSMUSG00000034422	69	378	4060	79	345	4788	211	1013	10808	144	876	12357	2653.51	3.53576	0.234646	10.8067	3.19804e-27	3.54183e-24	6h_vs_1h	ENSMUSG00000034422	Parp14
ENSMUSG00000034459	6	433	1684	4	372	2155	9	351	5184	8	412	5752	1237.05	3.00199	0.237301	8.43648	3.27038e-17	1.72474e-14	6h_vs_1h	ENSMUSG00000034459	Ifit1
ENSMUSG00000035517	50	270	1665	49	279	2064	160	457	2852	91	411	3100	926.316	2.72667	0.147105	11.7377	8.16587e-32	1.13046e-28	6h_vs_1h	ENSMUSG00000035517	Tdrd7
ENSMUSG00000035692	2	96	1010	2	108	1417	0	21	1956	1	71	2402	564.749	4.28083	0.58246	5.6327	1.77405e-08	5.31018e-06	6h_vs_1h	ENSMUSG00000035692	Isg15
ENSMUSG00000035929	56	115	320	64	98	407	100	160	585	125	171	590	225.435	1.75769	0.161884	4.68042	2.86291e-06	0.000773335	6h_vs_1h	ENSMUSG00000035929	H2-Q4
ENSMUSG00000036249	46	110	289	73	92	365	130	77	616	86	102	717	213.491	2.22405	0.209449	5.84415	5.09146e-09	1.54488e-06	6h_vs_1h	ENSMUSG00000036249	Rbm43
ENSMUSG00000037034	4	11	24	3	7	38	5	2	88	4	9	94	21.8831	2.85333	0.463223	4.00094	6.30901e-05	0.0153565	6h_vs_1h	ENSMUSG00000037034	Pax1
ENSMUSG00000037321	88	245	1170	97	227	1429	288	281	2367	168	361	2323	719.51	2.62926	0.139112	11.7119	1.10762e-31	1.44317e-28	6h_vs_1h	ENSMUSG00000037321	Tap1
ENSMUSG00000037921	132	300	3787	115	275	4683	269	392	8525	211	349	8919	2185.12	4.176	0.12488	25.4324	1.10495e-142	2.44746e-138	6h_vs_1h	ENSMUSG00000037921	Ddx60
ENSMUSG00000038507	274	875	5318	327	738	6734	646	1202	14044	486	1190	14961	3590.17	3.22001	0.1249	17.7743	1.11817e-70	6.19188e-67	6h_vs_1h	ENSMUSG00000038507	Parp12
ENSMUSG00000039236	5	7	95	4	8	103	30	30	150	14	28	131	48.7834	2.77656	0.392534	4.52588	6.01449e-06	0.00160507	6h_vs_1h	ENSMUSG00000039236	Isg20
ENSMUSG00000039853	20	58	158	13	61	207	35	57	371	21	53	331	110.938	2.08184	0.220545	4.90531	9.32787e-07	0.000255077	6h_vs_1h	ENSMUSG00000039853	Trim14
ENSMUSG00000040253	9	267	2672	15	250	3115	46	407	7773	21	381	8491	1760.32	3.91423	0.200088	14.5648	4.70678e-48	1.48936e-44	6h_vs_1h	ENSMUSG00000040253	Gbp7
ENSMUSG00000040296	763	2493	5929	849	2181	7288	1492	3485	13621	1039	3516	14828	4519.75	1.72299	0.0935922	7.72487	1.11965e-14	4.96004e-12	6h_vs_1h	ENSMUSG00000040296	Ddx58
ENSMUSG00000040483	547	973	3547	608	1026	4121	588	1159	6991	382	1036	7318	2281.74	2.25916	0.255222	4.93358	8.07344e-07	0.000223533	6h_vs_1h	ENSMUSG00000040483	Xaf1
ENSMUSG00000041827	24	1065	3710	39	991	4698	41	408	5602	29	506	5521	1916.23	2.53968	0.385543	3.99353	6.5097e-05	0.0156728	6h_vs_1h	ENSMUSG00000041827	Oasl1
ENSMUSG00000045932	30	44	236	39	40	300	111	108	605	83	131	671	182.14	2.4333	0.256186	5.59475	2.20934e-08	6.52491e-06	6h_vs_1h	ENSMUSG00000045932	Ifit2
ENSMUSG00000046718	378	1276	4483	375	1166	5831	654	1049	10577	517	1239	11151	3048.26	2.58311	0.181195	8.73705	2.39271e-18	1.35894e-15	6h_vs_1h	ENSMUSG00000046718	Bst2
ENSMUSG00000046805	5	11	51	0	9	76	3	27	140	1	27	234	43.3752	2.63464	0.379131	4.31156	1.62109e-05	0.00412727	6h_vs_1h	ENSMUSG00000046805	Mpeg1
ENSMUSG00000048782	16	17	99	13	15	116	13	14	149	10	5	137	50.9655	3.1935	0.415295	5.2818	1.27919e-07	3.67976e-05	6h_vs_1h	ENSMUSG00000048782	Insc
ENSMUSG00000048988	6	3	23	6	4	28	3	7	58	3	4	67	16.5005	3.1601	0.492449	4.38644	1.15221e-05	0.00296762	6h_vs_1h	ENSMUSG00000048988	Elfn1
ENSMUSG00000049502	144	860	3164	138	843	3789	287	1206	7955	253	1238	9085	2233.12	2.38699	0.135086	10.2675	9.87753e-25	9.51249e-22	6h_vs_1h	ENSMUSG00000049502	Dtx3l
ENSMUSG00000052776	124	367	1302	151	277	1546	184	297	2202	171	400	2281	761.116	2.36849	0.185999	7.3575	1.8738e-13	7.75098e-11	6h_vs_1h	ENSMUSG00000052776	Oas1a
ENSMUSG00000053835	3	44	203	2	44	230	1	44	643	3	38	657	144.09	3.12143	0.28838	7.35638	1.88963e-13	7.75098e-11	6h_vs_1h	ENSMUSG00000053835	H2-T24
ENSMUSG00000054072	1	2	48	1	8	81	1	13	268	1	6	291	51.0735	4.32822	0.49896	6.67032	2.55238e-11	9.26806e-09	6h_vs_1h	ENSMUSG00000054072	Iigp1
ENSMUSG00000054404	42	168	1539	37	166	1878	38	65	1736	36	77	2117	677.743	3.78971	0.414618	6.72838	1.71562e-11	6.33351e-09	6h_vs_1h	ENSMUSG00000054404	Slfn5
ENSMUSG00000056116	28	85	431	33	65	554	56	56	740	50	85	760	240.539	3.0104	0.207527	9.68738	3.41169e-22	2.60583e-19	6h_vs_1h	ENSMUSG00000056116	H2-T22
ENSMUSG00000057346	1	3	40	0	0	71	0	2	130	0	3	119	28.2402	5.37819	0.590937	7.4089	1.27352e-13	5.42469e-11	6h_vs_1h	ENSMUSG00000057346	Apol9a
ENSMUSG00000057554	156	419	1087	198	369	1400	340	424	1557	251	466	1798	700.806	1.74628	0.167579	4.45333	8.45503e-06	0.00220328	6h_vs_1h	ENSMUSG00000057554	Lgals8
ENSMUSG00000057596	6	4	68	2	5	93	2	1	162	2	7	178	41.3344	4.76754	0.437681	8.60795	7.4376e-18	4.01812e-15	6h_vs_1h	ENSMUSG00000057596	Trim30d
ENSMUSG00000060802	168	280	1165	206	244	1691	397	226	1533	278	265	1610	679.248	2.52404	0.236369	6.44773	1.13541e-10	3.86913e-08	6h_vs_1h	ENSMUSG00000060802	B2m
ENSMUSG00000061232	203	308	1070	212	268	1243	517	333	1632	361	405	1612	667.109	2.04543	0.153079	6.82936	8.52934e-12	3.25732e-09	6h_vs_1h	ENSMUSG00000061232	H2-K1
ENSMUSG00000062488	0	0	82	0	4	144	0	2	302	0	2	329	64.1189	6.56687	0.589454	9.44412	3.58414e-21	2.40572e-18	6h_vs_1h	ENSMUSG00000062488	Ifit3b
ENSMUSG00000063268	125	581	2567	146	564	2930	352	858	7028	263	982	7508	1820.75	2.60725	0.159447	10.0801	6.76253e-24	5.76115e-21	6h_vs_1h	ENSMUSG00000063268	Parp10
ENSMUSG00000064215	14	67	451	18	47	523	31	99	1636	20	119	1531	336.901	3.48774	0.24489	10.1586	3.03363e-24	2.6878e-21	6h_vs_1h	ENSMUSG00000064215	Ifi27
ENSMUSG00000067297	1	5	44	1	4	60	6	6	101	0	6	111	26.8676	3.81167	0.405048	6.94157	3.87778e-12	1.50689e-09	6h_vs_1h	ENSMUSG00000067297	Ifit1bl2
ENSMUSG00000068246	0	4	102	1	5	111	0	10	204	1	6	218	52.1459	4.58307	0.351263	10.2005	1.97209e-24	1.82007e-21	6h_vs_1h	ENSMUSG00000068246	Apol9b
ENSMUSG00000070327	1887	4121	42765	2545	4131	49835	5698	9894	93629	4360	8670	103854	25724.6	3.38028	0.185982	12.7985	1.67218e-37	4.62984e-34	6h_vs_1h	ENSMUSG00000070327	Rnf213
ENSMUSG00000073411	266	492	2234	282	454	2521	439	419	3288	406	536	3274	1213.72	2.50897	0.192595	7.8349	4.692e-15	2.16516e-12	6h_vs_1h	ENSMUSG00000073411	H2-D1
ENSMUSG00000073555	3	2	26	3	4	51	0	2	124	1	3	128	25.5023	4.68357	0.599759	6.14175	8.16173e-10	2.65856e-07	6h_vs_1h	ENSMUSG00000073555	Gm4951
ENSMUSG00000073929	0	0	7	0	0	6	0	0	17	0	0	15	3.45234	5.78695	1.29169	3.70595	0.000210598	0.0496249	6h_vs_1h	ENSMUSG00000073929	Trim30e-ps1
ENSMUSG00000074896	3	8	224	1	5	251	0	0	831	0	5	915	162.237	6.61174	0.848438	6.6142	3.73567e-11	1.3346e-08	6h_vs_1h	ENSMUSG00000074896	Ifit3
ENSMUSG00000075602	11	29	131	16	21	182	32	34	380	33	33	372	97.6573	3.04984	0.231147	8.86812	7.43908e-19	4.45339e-16	6h_vs_1h	ENSMUSG00000075602	Ly6a
ENSMUSG00000078349	3	13	73	3	11	75	4	13	112	3	9	129	36.6456	3.00017	0.318127	6.28734	3.22945e-10	1.06765e-07	6h_vs_1h	ENSMUSG00000078349	NA
ENSMUSG00000078920	4	6	117	1	16	153	2	12	355	0	10	354	78.1072	4.29674	0.349293	9.43833	3.78785e-21	2.46767e-18	6h_vs_1h	ENSMUSG00000078920	Ifi47
ENSMUSG00000078921	0	1	26	0	2	27	0	4	66	0	2	49	13.8309	4.13072	0.608088	5.14847	2.62625e-07	7.45787e-05	6h_vs_1h	ENSMUSG00000078921	Tgtp2
ENSMUSG00000079363	47	96	371	38	103	473	133	250	1408	93	277	1501	351.963	2.2435	0.291528	4.26546	1.99491e-05	0.00502129	6h_vs_1h	ENSMUSG00000079363	Gbp4

## Sheet: ISGs_in_MEFs
index	MEF_Ola_IFNb_0h_Rep1	MEF_Ola_IFNb_0h_Rep2	MEF_Ola_IFNb_1h_Rep1	MEF_Ola_IFNb_1h_Rep2	MEF_Ola_IFNb_6h_Rep1	MEF_Ola_IFNb_6h_Rep2	baseMean	log2FoldChange	lfcSE	stat	pvalue	padj	deseq_group	ENSEMBL	SYMBOL
ENSMUSG00000000275	1040	780	2859	2493	2993	4620	2546.94	2.13521	0.232363	6.67148	2.5324e-11	1.16826e-08	1h_vs_0h	ENSMUSG00000000275	Trim25
ENSMUSG00000000386	0	1	549	152	8632	14397	3743.48	10.0575	1.48502	6.37872	1.78573e-10	7.48911e-08	1h_vs_0h	ENSMUSG00000000386	Mx1
ENSMUSG00000002307	691	510	1245	1134	4367	9253	2715.94	1.56528	0.246784	3.97221	7.12089e-05	0.0132729	1h_vs_0h	ENSMUSG00000002307	Daxx
ENSMUSG00000002325	450	218	1315	1062	1617	2297	1200.31	2.46207	0.306516	6.1239	9.13146e-10	3.51048e-07	1h_vs_0h	ENSMUSG00000002325	Irf9
ENSMUSG00000003541	803	752	1498	1477	439	740	1008.86	1.48389	0.246932	3.64026	0.000272368	0.0444779	1h_vs_0h	ENSMUSG00000003541	Ier3
ENSMUSG00000003665	69	69	349	303	31	45	165.121	2.79295	0.344701	6.40541	1.49967e-10	6.43568e-08	1h_vs_0h	ENSMUSG00000003665	Has1
ENSMUSG00000006930	16	3	90	60	1815	2922	776.256	3.61722	0.494198	6.13564	8.48157e-10	3.33001e-07	1h_vs_0h	ENSMUSG00000006930	Hap1
ENSMUSG00000010358	378	264	725	626	4138	7796	2199.6	1.66067	0.244298	4.4031	1.06714e-05	0.00228976	1h_vs_0h	ENSMUSG00000010358	Ifi35
ENSMUSG00000016496	16	14	346	163	1059	3619	782.157	4.67682	0.546783	7.48344	7.24001e-14	4.30968e-11	1h_vs_0h	ENSMUSG00000016496	Cd274
ENSMUSG00000017830	17	19	128	85	1126	1901	520.984	3.13173	0.411528	6.18846	6.07531e-10	2.43712e-07	1h_vs_0h	ENSMUSG00000017830	Dhx58
ENSMUSG00000018899	543	322	5203	3785	2512	4751	3083.97	3.9906	0.291384	11.6877	1.47344e-31	3.02105e-28	1h_vs_0h	ENSMUSG00000018899	Irf1
ENSMUSG00000020638	6	3	457	226	11002	28834	6032.36	6.86353	0.645548	9.72589	2.33852e-22	2.27119e-19	1h_vs_0h	ENSMUSG00000020638	Cmpk2
ENSMUSG00000020641	3	2	640	307	20229	41074	9537.99	8.17426	0.765522	9.91384	3.62448e-23	3.93427e-20	1h_vs_0h	ENSMUSG00000020641	Rsad2
ENSMUSG00000021250	258	142	774	459	216	275	388.191	2.25273	0.381086	4.37627	1.2073e-05	0.00253162	1h_vs_0h	ENSMUSG00000021250	Fos
ENSMUSG00000022906	421	223	1117	828	6670	13214	3524.91	2.21906	0.30493	5.35881	8.37731e-08	2.41541e-05	1h_vs_0h	ENSMUSG00000022906	Parp9
ENSMUSG00000023087	396	332	712	797	383	649	568.726	1.6088	0.228196	4.48648	7.24108e-06	0.00162951	1h_vs_0h	ENSMUSG00000023087	Noct
ENSMUSG00000023341	12	6	2232	1173	3394	6475	2224.98	8.18431	0.515532	14.7407	3.53024e-49	3.25717e-45	1h_vs_0h	ENSMUSG00000023341	Mx2
ENSMUSG00000024235	160	80	584	324	307	457	341.238	2.55942	0.401547	4.91702	8.787e-07	0.000216195	1h_vs_0h	ENSMUSG00000024235	Map3k8
ENSMUSG00000024338	96	47	346	164	3406	5619	1536.22	2.47901	0.425251	4.45387	8.43356e-06	0.00187499	1h_vs_0h	ENSMUSG00000024338	Psmb8
ENSMUSG00000025498	29	14	969	620	9648	11628	3796.82	5.83013	0.417899	12.5512	3.91551e-36	1.20422e-32	1h_vs_0h	ENSMUSG00000025498	Irf7
ENSMUSG00000025746	85	87	367	323	285	705	312.935	2.55211	0.351194	5.60122	2.12853e-08	7.14141e-06	1h_vs_0h	ENSMUSG00000025746	Il6
ENSMUSG00000026104	291	136	946	609	5937	9044	2743.81	2.50731	0.351255	5.47269	4.43252e-08	1.38633e-05	1h_vs_0h	ENSMUSG00000026104	Stat1
ENSMUSG00000026535	674	546	2100	1491	15418	24497	7179.16	2.13558	0.2868	5.40648	6.42771e-08	1.91307e-05	1h_vs_0h	ENSMUSG00000026535	Ifi202b
ENSMUSG00000026536	52	34	129	87	1210	1634	512.407	1.9278	0.362553	3.70373	0.000212456	0.0366397	1h_vs_0h	ENSMUSG00000026536	Ifi211
ENSMUSG00000026896	120	70	808	503	9976	19939	4863.34	3.40451	0.34759	8.11159	4.99613e-16	3.29263e-13	1h_vs_0h	ENSMUSG00000026896	Ifih1
ENSMUSG00000027514	2	4	73	31	1444	1120	463.576	4.68906	0.790534	5.1915	2.08607e-07	5.75372e-05	1h_vs_0h	ENSMUSG00000027514	Zbp1
ENSMUSG00000027580	543	370	3057	2254	8589	15371	4925.78	3.13722	0.274922	9.28344	1.64098e-20	1.51405e-17	1h_vs_0h	ENSMUSG00000027580	Helz2
ENSMUSG00000028037	32	21	583	365	11911	17245	4838.16	4.76408	0.383492	10.8974	1.18555e-27	2.1877e-24	1h_vs_0h	ENSMUSG00000028037	Ifi44
ENSMUSG00000028268	44	16	784	324	11038	17976	4783.05	4.87623	0.498386	8.61027	7.2891e-18	5.6044e-15	1h_vs_0h	ENSMUSG00000028268	Gbp3
ENSMUSG00000028270	437	187	1558	685	17252	26614	7466.9	2.51434	0.44515	4.33413	1.46339e-05	0.00296746	1h_vs_0h	ENSMUSG00000028270	Gbp2
ENSMUSG00000029298	23	9	133	28	3156	4650	1276.39	3.00837	0.649429	3.73154	0.000190312	0.0337677	1h_vs_0h	ENSMUSG00000029298	Gbp9
ENSMUSG00000029561	8	4	189	78	4665	5486	1714.68	5.10152	0.619893	7.28597	3.19364e-13	1.78583e-10	1h_vs_0h	ENSMUSG00000029561	Oasl2
ENSMUSG00000029605	19	9	278	152	955	1549	485.283	4.56557	0.471483	8.44265	3.1022e-17	2.20173e-14	1h_vs_0h	ENSMUSG00000029605	Oas1b
ENSMUSG00000030107	16	12	1273	816	7979	16819	4196.67	6.8159	0.43146	14.4414	2.83876e-47	1.74612e-43	1h_vs_0h	ENSMUSG00000030107	Usp18
ENSMUSG00000030157	612	407	1296	1095	2164	3412	1505.67	1.82448	0.244185	5.076	3.85464e-07	9.87913e-05	1h_vs_0h	ENSMUSG00000030157	Clec2d
ENSMUSG00000030966	151	113	1382	994	2071	4600	1531.19	3.75747	0.317937	9.97831	1.89667e-23	2.18746e-20	1h_vs_0h	ENSMUSG00000030966	Trim21
ENSMUSG00000031639	44	23	172	66	2118	3357	919.105	2.46903	0.486571	3.87205	0.000107925	0.0197182	1h_vs_0h	ENSMUSG00000031639	Tlr3
ENSMUSG00000032515	490	366	1058	1101	893	1502	931.212	1.90745	0.208972	6.32836	2.47785e-10	1.01608e-07	1h_vs_0h	ENSMUSG00000032515	Csrnp1
ENSMUSG00000032596	154	80	540	264	2798	3536	1223.09	2.42122	0.421793	4.35337	1.34059e-05	0.00274866	1h_vs_0h	ENSMUSG00000032596	Uba7
ENSMUSG00000033355	20	14	538	320	1664	2441	833.798	5.25797	0.42945	10.8813	1.41525e-27	2.37414e-24	1h_vs_0h	ENSMUSG00000033355	Rtp4
ENSMUSG00000033538	13	16	122	60	189	416	133.305	3.21429	0.53799	4.88724	1.02258e-06	0.000248284	1h_vs_0h	ENSMUSG00000033538	Casp4
ENSMUSG00000033576	41	15	158	54	1566	1897	614.979	2.5953	0.556735	3.61087	0.000305172	0.0489696	1h_vs_0h	ENSMUSG00000033576	Apol6
ENSMUSG00000034422	84	59	1342	687	9547	16068	4436.12	4.43356	0.390469	9.85625	6.441e-23	6.6031e-20	1h_vs_0h	ENSMUSG00000034422	Parp14
ENSMUSG00000034459	23	13	11294	3981	27963	48309	15063.8	9.36549	0.533693	16.4523	8.07245e-61	1.48961e-56	1h_vs_0h	ENSMUSG00000034459	Ifit1
ENSMUSG00000034855	5	6	547	235	17719	29347	7519.93	6.74183	0.61212	10.0582	8.45229e-24	1.0398e-20	1h_vs_0h	ENSMUSG00000034855	Cxcl10
ENSMUSG00000035373	647	287	3470	1948	4521	7208	3088.23	3.19268	0.386042	6.75491	1.42922e-11	6.94038e-09	1h_vs_0h	ENSMUSG00000035373	Ccl7
ENSMUSG00000035385	1218	428	2972	1651	8010	11325	4254.7	2.17221	0.429684	3.6939	0.000220839	0.0373867	1h_vs_0h	ENSMUSG00000035385	Ccl2
ENSMUSG00000035673	2037	1615	3363	3148	1142	1733	2289.46	1.40362	0.222124	3.68543	0.000228315	0.0383009	1h_vs_0h	ENSMUSG00000035673	Sbno2
ENSMUSG00000035692	30	9	839	607	6589	9761	2894.41	5.8518	0.409864	12.8501	8.58751e-38	3.16931e-34	1h_vs_0h	ENSMUSG00000035692	Isg15
ENSMUSG00000035828	638	604	1833	1259	601	1015	1063.62	1.87653	0.317751	4.06459	4.81176e-05	0.00915376	1h_vs_0h	ENSMUSG00000035828	Pim3
ENSMUSG00000037321	389	206	1262	811	8739	16527	4391.05	2.43102	0.333901	5.52865	3.22708e-08	1.06338e-05	1h_vs_0h	ENSMUSG00000037321	Tap1
ENSMUSG00000037447	540	424	1669	992	730	833	940.028	2.05333	0.368782	3.98158	6.84589e-05	0.0128905	1h_vs_0h	ENSMUSG00000037447	Arid5a
ENSMUSG00000037921	2	3	84	22	1661	4128	884.12	5.00345	0.851137	5.19123	2.08909e-07	5.75372e-05	1h_vs_0h	ENSMUSG00000037921	Ddx60
ENSMUSG00000038037	209	95	2390	1181	1355	2041	1320.18	4.20996	0.420779	8.61487	7.00211e-18	5.6044e-15	1h_vs_0h	ENSMUSG00000038037	Socs1
ENSMUSG00000039304	2	2	30	15	438	609	177.228	4.08162	0.841626	4.1546	3.25852e-05	0.00639675	1h_vs_0h	ENSMUSG00000039304	Tnfsf10
ENSMUSG00000039501	1151	705	1936	1547	6386	10373	3591.31	1.51437	0.257382	3.61086	0.000305181	0.0489696	1h_vs_0h	ENSMUSG00000039501	Znfx1
ENSMUSG00000039997	94	76	945	560	6422	8757	2766.77	3.73325	0.361499	8.70889	3.06866e-18	2.5739e-15	1h_vs_0h	ENSMUSG00000039997	Ifi203
ENSMUSG00000040033	668	362	2986	2361	9178	12393	4696.26	2.99645	0.291144	8.28267	1.20444e-16	8.23169e-14	1h_vs_0h	ENSMUSG00000040033	Stat2
ENSMUSG00000040253	141	59	1416	688	8760	13965	4032.63	4.05756	0.431232	8.05266	8.10151e-16	5.15507e-13	1h_vs_0h	ENSMUSG00000040253	Gbp7
ENSMUSG00000040264	286	159	1519	573	29743	48128	12702.6	2.87734	0.45821	5.00281	5.65017e-07	0.000142825	1h_vs_0h	ENSMUSG00000040264	Gbp2b
ENSMUSG00000040483	147	40	492	296	3310	3826	1354.51	2.76897	0.478905	4.56033	5.10737e-06	0.00116353	1h_vs_0h	ENSMUSG00000040483	Xaf1
ENSMUSG00000041827	0	0	328	174	2972	5794	1446.53	10.9965	1.49464	6.96592	3.26262e-12	1.72015e-09	1h_vs_0h	ENSMUSG00000041827	Oasl1
ENSMUSG00000043953	5	1	26	16	681	1471	334.866	3.41221	0.715403	3.95192	7.7527e-05	0.0143061	1h_vs_0h	ENSMUSG00000043953	Ccrl2
ENSMUSG00000044786	222	99	696	382	389	400	396.947	2.40195	0.445546	4.07802	4.54217e-05	0.00873091	1h_vs_0h	ENSMUSG00000044786	Zfp36
ENSMUSG00000046718	146	136	414	378	4334	5674	1813.14	2.04533	0.28504	5.12324	3.00329e-07	7.91709e-05	1h_vs_0h	ENSMUSG00000046718	Bst2
ENSMUSG00000046879	364	344	4164	2794	11663	18498	6274.67	3.85958	0.318903	10.2683	9.79465e-25	1.291e-21	1h_vs_0h	ENSMUSG00000046879	Irgm1
ENSMUSG00000047735	814	406	2540	1553	13246	23828	6742.59	2.38665	0.348496	5.16978	2.34374e-07	6.36016e-05	1h_vs_0h	ENSMUSG00000047735	Samd9l
ENSMUSG00000048852	0	2	34	8	349	636	161.296	4.97227	1.17047	3.74828	0.000178048	0.0318983	1h_vs_0h	ENSMUSG00000048852	Gm12185
ENSMUSG00000049502	291	151	1849	1118	5917	8711	2993.43	3.38136	0.353774	7.90436	2.69309e-15	1.65652e-12	1h_vs_0h	ENSMUSG00000049502	Dtx3l
ENSMUSG00000050370	239	225	708	784	947	2828	918.647	2.22876	0.344432	4.77238	1.82065e-06	0.000436318	1h_vs_0h	ENSMUSG00000050370	Ch25h
ENSMUSG00000053113	904	465	9948	5184	453	543	3488.58	4.10978	0.401464	8.77981	1.63751e-18	1.4389e-15	1h_vs_0h	ENSMUSG00000053113	Socs3
ENSMUSG00000053175	138	71	542	342	48	69	229.189	2.7116	0.385361	5.51846	3.41988e-08	1.10714e-05	1h_vs_0h	ENSMUSG00000053175	Bcl3
ENSMUSG00000054072	24	15	5258	1496	29486	42832	12919.1	8.07198	0.574721	13.0272	8.57506e-39	3.95589e-35	1h_vs_0h	ENSMUSG00000054072	Iigp1
ENSMUSG00000054203	11	10	152	85	1649	2281	680.498	4.08426	0.487858	7.17271	7.35282e-13	3.99063e-10	1h_vs_0h	ENSMUSG00000054203	Ifi205
ENSMUSG00000054404	45	9	414	137	3812	5756	1635.3	4.07356	0.609678	5.72198	1.0529e-08	3.66587e-06	1h_vs_0h	ENSMUSG00000054404	Slfn5
ENSMUSG00000057346	7	9	77	79	352	636	186.84	3.84639	0.472136	6.90775	4.92414e-12	2.52403e-09	1h_vs_0h	ENSMUSG00000057346	Apol9a
ENSMUSG00000060519	391	425	1583	1274	11374	18894	5430.66	2.34702	0.302621	5.82254	5.79614e-09	2.05685e-06	1h_vs_0h	ENSMUSG00000060519	Tor3a
ENSMUSG00000062488	11	5	683	289	10112	16868	4417.52	6.55814	0.568264	10.5112	7.66978e-26	1.0887e-22	1h_vs_0h	ENSMUSG00000062488	Ifit3b
ENSMUSG00000063268	124	46	330	229	2299	4624	1193.34	2.37322	0.386221	4.63005	3.6558e-06	0.000843256	1h_vs_0h	ENSMUSG00000063268	Parp10
ENSMUSG00000063388	0	0	303	87	581	972	324.501	10.652	1.54981	6.49568	8.26588e-11	3.72025e-08	1h_vs_0h	ENSMUSG00000063388	NA
ENSMUSG00000068245	45	22	263	155	3467	5755	1536.19	3.26884	0.393814	6.815	9.42625e-12	4.70115e-09	1h_vs_0h	ENSMUSG00000068245	Phf11d
ENSMUSG00000068246	1	2	21	32	215	493	117.442	4.7	0.927837	4.43504	9.20546e-06	0.00202224	1h_vs_0h	ENSMUSG00000068246	Apol9b
ENSMUSG00000068606	0	0	199	55	1113	1856	517.093	10.0335	1.54775	6.1047	1.02994e-09	3.87866e-07	1h_vs_0h	ENSMUSG00000068606	Gm4841
ENSMUSG00000069874	63	28	2222	1118	4453	7766	2603.71	5.84668	0.429775	12.2429	1.83468e-34	4.83647e-31	1h_vs_0h	ENSMUSG00000069874	Irgm2
ENSMUSG00000070327	1667	1170	7079	4202	47622	91290	24038.1	2.59354	0.331639	6.05641	1.39189e-09	5.13691e-07	1h_vs_0h	ENSMUSG00000070327	Rnf213
ENSMUSG00000071637	1826	1052	3933	2726	899	1333	2113.36	1.82978	0.30454	4.08741	4.3621e-05	0.00847303	1h_vs_0h	ENSMUSG00000071637	Cebpd
ENSMUSG00000072620	14	13	63	57	506	1002	258.805	2.72243	0.416159	5.13609	2.80512e-07	7.50188e-05	1h_vs_0h	ENSMUSG00000072620	Slfn2
ENSMUSG00000073489	386	275	945	768	8854	14207	4060.33	1.96141	0.250779	5.48854	4.05275e-08	1.2894e-05	1h_vs_0h	ENSMUSG00000073489	Ifi204
ENSMUSG00000073490	3	0	47	21	215	329	100.404	5.13327	0.978169	4.64978	3.32293e-06	0.000776178	1h_vs_0h	ENSMUSG00000073490	Ifi207
ENSMUSG00000073555	1	0	49	20	638	723	237.796	6.70793	1.46792	4.17116	3.03059e-05	0.00601328	1h_vs_0h	ENSMUSG00000073555	Gm4951
ENSMUSG00000074151	12	7	83	39	4010	6062	1620.3	3.29441	0.515065	5.26032	1.43802e-07	4.08244e-05	1h_vs_0h	ENSMUSG00000074151	Nlrc5
ENSMUSG00000074896	29	9	1607	723	29526	51603	13083.4	6.60619	0.506331	11.8918	1.30543e-32	3.01115e-29	1h_vs_0h	ENSMUSG00000074896	Ifit3
ENSMUSG00000078349	39	21	167	143	512	697	265.288	2.97206	0.35738	6.67934	2.40013e-11	1.13563e-08	1h_vs_0h	ENSMUSG00000078349	NA
ENSMUSG00000078853	54	20	1697	758	8049	11906	3685.21	5.71992	0.478152	10.7391	6.66947e-27	1.0256e-23	1h_vs_0h	ENSMUSG00000078853	Igtp
ENSMUSG00000078920	30	35	259	123	4095	5080	1576.55	3.11707	0.463655	5.46111	4.73171e-08	1.45524e-05	1h_vs_0h	ENSMUSG00000078920	Ifi47
ENSMUSG00000078921	4	0	45	22	1170	1927	498.728	4.68676	0.832964	4.92429	8.46675e-07	0.000211131	1h_vs_0h	ENSMUSG00000078921	Tgtp2
ENSMUSG00000078922	5	1	47	15	974	1682	426.654	4.00873	0.775678	4.41386	1.01544e-05	0.00220446	1h_vs_0h	ENSMUSG00000078922	Tgtp1
ENSMUSG00000079339	16	10	538	179	5225	9013	2367.67	5.41387	0.565161	8.54424	1.29383e-17	9.54999e-15	1h_vs_0h	ENSMUSG00000079339	Ifit1bl1
ENSMUSG00000082292	2	1	119	32	1837	2439	719.571	6.28256	1.00137	5.68978	1.27207e-08	4.34694e-06	1h_vs_0h	ENSMUSG00000082292	NA
ENSMUSG00000090215	14	12	66	48	137	327	96.4289	2.71094	0.495173	4.29333	1.76013e-05	0.0035304	1h_vs_0h	ENSMUSG00000090215	Trim34b
ENSMUSG00000090222	4	6	61	39	462	570	189.58	3.89167	0.606614	5.45103	5.00795e-08	1.51495e-05	1h_vs_0h	ENSMUSG00000090222	NA
ENSMUSG00000090272	32	10	183	97	2056	3380	913.833	3.39456	0.471048	5.96449	2.45393e-09	8.87891e-07	1h_vs_0h	ENSMUSG00000090272	Mndal
ENSMUSG00000090942	0	1	115	15	826	733	291.609	7.60215	1.92388	3.6474	0.000264903	0.0436451	1h_vs_0h	ENSMUSG00000090942	F830016B08Rik
ENSMUSG00000092021	0	0	18	5	71	123	34.9914	6.5557	1.6052	3.71959	0.000199547	0.034738	1h_vs_0h	ENSMUSG00000092021	Gbp11
ENSMUSG00000096727	12	3	142	83	972	1393	424.965	4.54119	0.542859	7.2877	3.15284e-13	1.78583e-10	1h_vs_0h	ENSMUSG00000096727	Psmb9
ENSMUSG00000096954	37	21	184	78	227	362	154.975	2.80559	0.505359	4.39408	1.11241e-05	0.00235946	1h_vs_0h	ENSMUSG00000096954	NA
ENSMUSG00000097194	0	1	29	21	87	61	36.2253	6.21104	1.52174	3.6971	0.000218073	0.0372601	1h_vs_0h	ENSMUSG00000097194	NA
ENSMUSG00000104713	2	0	28	10	307	424	125.11	4.87117	1.15197	3.72072	0.000198653	0.034738	1h_vs_0h	ENSMUSG00000104713	Gbp6
ENSMUSG00000105504	0	1	106	53	1122	1912	505.666	7.89961	1.43911	5.08273	3.72048e-07	9.66959e-05	1h_vs_0h	ENSMUSG00000105504	Gbp5
ENSMUSG00000106734	62	25	337	151	936	1496	494.901	3.1494	0.475909	5.38843	7.10769e-08	2.08188e-05	1h_vs_0h	ENSMUSG00000106734	NA
ENSMUSG00000107017	5	2	45	17	65	74	36.6821	3.78214	0.845406	3.78178	0.000155709	0.0281696	1h_vs_0h	ENSMUSG00000107017	NA
ENSMUSG00000107215	20	6	182	91	396	602	217.774	4.04764	0.535489	6.46631	1.00425e-10	4.41224e-08	1h_vs_0h	ENSMUSG00000107215	NA
ENSMUSG00000108068	8	1	49	33	84	157	55.1193	3.82751	0.695525	4.66195	3.13221e-06	0.000741009	1h_vs_0h	ENSMUSG00000108068	NA
ENSMUSG00000109729	0	0	17	9	14	40	13.3066	6.72114	1.66916	3.67619	0.000236739	0.0393562	1h_vs_0h	ENSMUSG00000109729	NA
ENSMUSG00000116639	0	1	69	28	66	78	43.9368	7.18777	1.51129	4.36896	1.2484e-05	0.0025884	1h_vs_0h	ENSMUSG00000116639	NA
ENSMUSG00000000275	1040	780	2859	2493	2993	4620	2546.94	2.26531	0.232151	7.23802	4.55286e-13	3.98149e-11	6h_vs_0h	ENSMUSG00000000275	Trim25
ENSMUSG00000000386	0	1	549	152	8632	14397	3743.48	14.6639	1.48408	9.48661	2.38674e-21	3.40732e-19	6h_vs_0h	ENSMUSG00000000386	Mx1
ENSMUSG00000000409	9	8	13	15	43	119	31.8619	3.35333	0.622046	4.45037	8.57216e-06	0.000415017	6h_vs_0h	ENSMUSG00000000409	Lck
ENSMUSG00000000708	809	415	565	403	1977	2787	1122.12	2.22194	0.318717	5.13601	2.80627e-07	1.59976e-05	6h_vs_0h	ENSMUSG00000000708	Kat2b
ENSMUSG00000001123	254	105	310	172	1768	1796	739.745	3.65468	0.441875	6.94694	3.73287e-12	3.07143e-10	6h_vs_0h	ENSMUSG00000001123	Lgals9
ENSMUSG00000001156	220	129	118	142	308	685	249.341	1.67344	0.294826	3.69179	0.000222677	0.00913853	6h_vs_0h	ENSMUSG00000001156	Mxd1
ENSMUSG00000001166	13	8	27	23	179	359	95.1807	4.8477	0.46821	9.10426	8.68603e-20	1.15145e-17	6h_vs_0h	ENSMUSG00000001166	Oas1c
ENSMUSG00000001630	277	210	197	220	440	1019	370.549	1.71342	0.277056	4.07291	4.643e-05	0.00204084	6h_vs_0h	ENSMUSG00000001630	Stk38l
ENSMUSG00000001750	899	654	1228	999	5104	7889	2718.14	3.26882	0.247128	10.86	1.787e-27	3.28003e-25	6h_vs_0h	ENSMUSG00000001750	Tcirg1
ENSMUSG00000001768	1388	777	977	778	2899	4264	1786.83	1.9702	0.276	5.01882	5.1989e-07	2.88496e-05	6h_vs_0h	ENSMUSG00000001768	Rin2
ENSMUSG00000002227	300	127	325	190	2017	2247	863.604	3.64408	0.414848	7.37399	1.65597e-13	1.51976e-11	6h_vs_0h	ENSMUSG00000002227	Mov10
ENSMUSG00000002307	691	510	1245	1134	4367	9253	2715.94	3.64963	0.245352	12.4908	8.38508e-36	2.18837e-33	6h_vs_0h	ENSMUSG00000002307	Daxx
ENSMUSG00000002325	450	218	1315	1062	1617	2297	1200.31	2.8154	0.306002	7.28885	3.12604e-13	2.7922e-11	6h_vs_0h	ENSMUSG00000002325	Irf9
ENSMUSG00000002847	29	25	26	28	107	214	67.4966	2.72089	0.409904	5.2107	1.88131e-07	1.10646e-05	6h_vs_0h	ENSMUSG00000002847	Pla1a
ENSMUSG00000003282	692	415	459	323	1354	1782	814.925	1.75812	0.312785	3.75057	0.00017643	0.00731242	6h_vs_0h	ENSMUSG00000003282	Plag1
ENSMUSG00000005640	1	1	0	1	19	36	8.92521	4.94292	1.34655	3.23636	0.00121067	0.0454421	6h_vs_0h	ENSMUSG00000005640	Insrr
ENSMUSG00000006418	782	597	822	761	2225	3873	1460.36	2.32192	0.220543	7.87565	3.38967e-15	3.51662e-13	6h_vs_0h	ENSMUSG00000006418	Rnf114
ENSMUSG00000006611	39	29	29	30	100	184	65.1553	2.23614	0.391925	4.2129	2.5211e-05	0.00115055	6h_vs_0h	ENSMUSG00000006611	Hfe
ENSMUSG00000006930	16	3	90	60	1815	2922	776.256	8.20542	0.480571	15.857	1.25773e-56	8.40314e-54	6h_vs_0h	ENSMUSG00000006930	Hap1
ENSMUSG00000009035	1286	660	934	825	3396	3203	1727.01	2.09738	0.350927	4.30967	1.635e-05	0.000762832	6h_vs_0h	ENSMUSG00000009035	Tmem184b
ENSMUSG00000009207	1072	691	633	595	1575	3381	1239.95	1.65131	0.248574	4.28972	1.78901e-05	0.00083005	6h_vs_0h	ENSMUSG00000009207	Lnpk
ENSMUSG00000009585	318	240	351	279	901	1653	600.075	2.36408	0.269062	6.61213	3.78824e-11	2.9159e-09	6h_vs_0h	ENSMUSG00000009585	Apobec3
ENSMUSG00000010358	378	264	725	626	4138	7796	2199.6	4.38951	0.241528	15.7518	6.6726e-56	4.12787e-53	6h_vs_0h	ENSMUSG00000010358	Ifi35
ENSMUSG00000010601	7	7	13	6	78	153	41.2729	4.19223	0.624644	5.77486	7.70178e-09	5.06468e-07	6h_vs_0h	ENSMUSG00000010601	Apol7a
ENSMUSG00000011267	5	11	4	12	37	132	29.7364	3.38774	0.785044	3.57017	0.000356747	0.0142896	6h_vs_0h	ENSMUSG00000011267	Zfp296
ENSMUSG00000012519	144	167	194	193	2563	4671	1240.27	4.66522	0.297786	13.7019	9.89382e-43	3.24032e-40	6h_vs_0h	ENSMUSG00000012519	Mlkl
ENSMUSG00000014030	0	1	2	0	46	84	20.6638	7.17635	1.52781	4.31424	1.60152e-05	0.00075141	6h_vs_0h	ENSMUSG00000014030	Pax5
ENSMUSG00000014773	11	8	23	19	242	495	123.409	5.43529	0.468614	10.3503	4.17219e-25	6.76583e-23	6h_vs_0h	ENSMUSG00000014773	Dll1
ENSMUSG00000015377	81	57	64	40	178	375	124.219	2.15745	0.384736	4.08709	4.36826e-05	0.00193536	6h_vs_0h	ENSMUSG00000015377	Dennd6b
ENSMUSG00000016206	66	46	54	61	327	789	205.229	3.44938	0.335123	8.54726	1.26047e-17	1.44203e-15	6h_vs_0h	ENSMUSG00000016206	H2-M3
ENSMUSG00000016496	16	14	346	163	1059	3619	782.157	7.34242	0.543578	12.4314	1.76592e-35	4.53786e-33	6h_vs_0h	ENSMUSG00000016496	Cd274
ENSMUSG00000017057	1426	956	1193	1001	2954	5028	2016.92	1.94091	0.237791	5.7021	1.18338e-08	7.66121e-07	6h_vs_0h	ENSMUSG00000017057	Il13ra1
ENSMUSG00000017830	17	19	128	85	1126	1901	520.984	6.55856	0.400514	14.9148	2.6425e-50	1.07653e-47	6h_vs_0h	ENSMUSG00000017830	Dhx58
ENSMUSG00000017929	1276	991	1332	1287	3302	4407	2085.5	1.98892	0.23654	5.93522	2.93454e-09	1.98444e-07	6h_vs_0h	ENSMUSG00000017929	B4galt5
ENSMUSG00000018899	543	322	5203	3785	2512	4751	3083.97	3.26103	0.291523	9.17949	4.33154e-20	5.83465e-18	6h_vs_0h	ENSMUSG00000018899	Irf1
ENSMUSG00000019082	352	281	359	391	1491	2207	826.264	2.74841	0.225285	9.60301	7.76432e-22	1.13761e-19	6h_vs_0h	ENSMUSG00000019082	Slc25a22
ENSMUSG00000019699	1224	833	651	725	2635	3999	1608.24	1.90446	0.201119	6.56056	5.36046e-11	4.10714e-09	6h_vs_0h	ENSMUSG00000019699	Akt3
ENSMUSG00000019866	147	85	132	102	1290	2023	600.587	4.05995	0.28826	12.0549	1.82761e-33	4.36093e-31	6h_vs_0h	ENSMUSG00000019866	Crybg1
ENSMUSG00000020128	1280	995	739	823	1841	3863	1496.59	1.46815	0.228264	3.869	0.000109285	0.00456345	6h_vs_0h	ENSMUSG00000020128	Vps54
ENSMUSG00000020134	499	368	365	360	809	1377	607.286	1.51964	0.220587	4.23704	2.26482e-05	0.00104213	6h_vs_0h	ENSMUSG00000020134	Peli1
ENSMUSG00000020357	188	191	126	201	573	960	358.47	2.1691	0.313132	5.05889	4.21709e-07	2.37165e-05	6h_vs_0h	ENSMUSG00000020357	Flt4
ENSMUSG00000020464	981	803	1229	1092	4727	9025	2833.19	3.09864	0.239176	10.5096	7.8034e-26	1.33e-23	6h_vs_0h	ENSMUSG00000020464	Pnpt1
ENSMUSG00000020572	849	540	993	656	4434	7791	2424.74	3.33445	0.303769	9.05113	1.41491e-19	1.83204e-17	6h_vs_0h	ENSMUSG00000020572	Nampt
ENSMUSG00000020638	6	3	457	226	11002	28834	6032.36	12.2376	0.643272	18.1145	2.44703e-73	3.14405e-70	6h_vs_0h	ENSMUSG00000020638	Cmpk2
ENSMUSG00000020641	3	2	640	307	20229	41074	9537.99	13.7409	0.764137	17.2167	1.98941e-66	1.84606e-63	6h_vs_0h	ENSMUSG00000020641	Rsad2
ENSMUSG00000020676	11	9	46	26	149	166	69.4797	4.23181	0.563103	6.47627	9.40155e-11	7.13792e-09	6h_vs_0h	ENSMUSG00000020676	Ccl11
ENSMUSG00000020707	112	123	93	122	373	1177	301.368	2.76064	0.401656	5.41668	6.07154e-08	3.71476e-06	6h_vs_0h	ENSMUSG00000020707	Rnf135
ENSMUSG00000020790	2579	1674	1845	1777	5188	8688	3482.05	1.90919	0.206627	6.40861	1.4685e-10	1.09993e-08	6h_vs_0h	ENSMUSG00000020790	Ankfy1
ENSMUSG00000020805	2	4	2	2	44	62	18.6174	4.31908	0.867071	4.30655	1.65821e-05	0.000771506	6h_vs_0h	ENSMUSG00000020805	Slc13a5
ENSMUSG00000020961	35	39	22	28	209	546	132.293	3.42943	0.414654	6.85977	6.89708e-12	5.59233e-10	6h_vs_0h	ENSMUSG00000020961	Ston2
ENSMUSG00000021036	2856	1963	2204	1960	5869	10094	3991.94	1.91948	0.219533	6.07873	1.21141e-09	8.53766e-08	6h_vs_0h	ENSMUSG00000021036	Sptlc2
ENSMUSG00000021242	4253	3661	2878	3449	8066	11828	5541.11	1.52313	0.221092	4.24317	2.20385e-05	0.00101688	6h_vs_0h	ENSMUSG00000021242	Npc2
ENSMUSG00000021565	0	0	1	0	26	21	8.25946	7.29242	1.79296	3.74098	0.000183307	0.00757863	6h_vs_0h	ENSMUSG00000021565	Slc6a19
ENSMUSG00000021583	598	348	342	324	1823	2643	973.058	2.47985	0.246336	7.69215	1.44688e-14	1.44714e-12	6h_vs_0h	ENSMUSG00000021583	Erap1
ENSMUSG00000021809	132	70	82	78	278	609	193.541	2.31016	0.325818	5.29484	1.19119e-07	7.15697e-06	6h_vs_0h	ENSMUSG00000021809	Nudt13
ENSMUSG00000022014	1	2	7	12	580	900	237.47	9.14513	0.883003	9.69433	3.18719e-22	4.796e-20	6h_vs_0h	ENSMUSG00000022014	Epsti1
ENSMUSG00000022035	653	472	460	425	971	1855	768.753	1.49623	0.233803	3.89742	9.72229e-05	0.00411117	6h_vs_0h	ENSMUSG00000022035	Ccdc25
ENSMUSG00000022197	107	73	84	64	642	909	302.211	3.33314	0.304698	9.01924	1.89393e-19	2.43341e-17	6h_vs_0h	ENSMUSG00000022197	Pdzd2
ENSMUSG00000022216	496	411	430	492	1652	3263	1064.4	2.58395	0.230504	8.67209	4.24254e-18	5.06165e-16	6h_vs_0h	ENSMUSG00000022216	Psme1
ENSMUSG00000022309	296	228	157	151	648	1103	407.695	1.92154	0.238984	5.59259	2.23702e-08	1.43161e-06	6h_vs_0h	ENSMUSG00000022309	Angpt1
ENSMUSG00000022548	115	26	134	34	2293	1587	729.531	5.25208	1.06725	4.37301	1.22545e-05	0.000581497	6h_vs_0h	ENSMUSG00000022548	Apod
ENSMUSG00000022575	360	322	236	322	1161	1868	682.998	2.32481	0.252615	6.88721	5.68987e-12	4.636e-10	6h_vs_0h	ENSMUSG00000022575	Gsdmd
ENSMUSG00000022587	604	285	573	414	4058	3890	1652.47	3.50194	0.383771	7.60073	2.9446e-14	2.85952e-12	6h_vs_0h	ENSMUSG00000022587	Ly6e
ENSMUSG00000022602	183	139	137	210	418	449	257.418	1.69248	0.342008	3.23818	0.00120295	0.0452543	6h_vs_0h	ENSMUSG00000022602	Arc
ENSMUSG00000022686	461	343	429	290	827	1947	673.838	1.91448	0.33268	3.99626	6.43502e-05	0.00277737	6h_vs_0h	ENSMUSG00000022686	B3gnt5
ENSMUSG00000022867	1640	1142	1187	1136	5205	9568	3132.72	2.5868	0.209665	9.54758	1.32757e-21	1.91159e-19	6h_vs_0h	ENSMUSG00000022867	Usp25
ENSMUSG00000022906	421	223	1117	828	6670	13214	3524.91	5.14339	0.303373	15.0257	4.98479e-51	2.1349e-48	6h_vs_0h	ENSMUSG00000022906	Parp9
ENSMUSG00000023186	2569	1383	1703	1231	5230	7894	3207.08	1.97586	0.299212	4.64842	3.34487e-06	0.000170334	6h_vs_0h	ENSMUSG00000023186	Vwa5a
ENSMUSG00000023206	141	119	105	135	425	1002	298.239	2.57291	0.306641	6.48284	9.00095e-11	6.86497e-09	6h_vs_0h	ENSMUSG00000023206	Il15ra
ENSMUSG00000023249	1090	664	993	856	2649	3498	1604.31	2.06294	0.264217	5.59365	2.22344e-08	1.42839e-06	6h_vs_0h	ENSMUSG00000023249	Parp3
ENSMUSG00000023307	1445	1098	1049	1147	2877	5201	2045.03	1.83831	0.197777	6.33697	2.34329e-10	1.73186e-08	6h_vs_0h	ENSMUSG00000023307	March5
ENSMUSG00000023341	12	6	2232	1173	3394	6475	2224.98	9.28356	0.515171	16.8848	5.82251e-64	4.63111e-61	6h_vs_0h	ENSMUSG00000023341	Mx2
ENSMUSG00000023961	509	281	361	330	2709	4244	1341.32	3.36999	0.251003	11.0954	1.32006e-28	2.56384e-26	6h_vs_0h	ENSMUSG00000023961	Enpp4
ENSMUSG00000024066	72	49	61	42	2213	2613	825.218	5.57785	0.33721	14.8064	1.33249e-49	5.29918e-47	6h_vs_0h	ENSMUSG00000024066	Xdh
ENSMUSG00000024079	1169	581	2144	1485	8516	14147	4520.78	3.93037	0.318616	10.4997	8.6668e-26	1.46224e-23	6h_vs_0h	ENSMUSG00000024079	Eif2ak2
ENSMUSG00000024112	152	87	98	57	585	676	270.511	2.68187	0.390509	5.36957	7.89234e-08	4.7763e-06	6h_vs_0h	ENSMUSG00000024112	Cacna1h
ENSMUSG00000024235	160	80	584	324	307	457	341.238	1.92107	0.402299	3.32109	0.000896659	0.0344296	6h_vs_0h	ENSMUSG00000024235	Map3k8
ENSMUSG00000024302	194	108	113	114	458	555	251.495	2.02059	0.311625	4.60679	4.08938e-06	0.000205738	6h_vs_0h	ENSMUSG00000024302	Dtna
ENSMUSG00000024308	1064	455	871	698	5607	8397	2737.98	3.47539	0.323979	8.92154	4.59868e-19	5.73223e-17	6h_vs_0h	ENSMUSG00000024308	Tapbp
ENSMUSG00000024338	96	47	346	164	3406	5619	1536.22	6.21218	0.420809	13.3723	8.78069e-41	2.716e-38	6h_vs_0h	ENSMUSG00000024338	Psmb8
ENSMUSG00000024339	395	336	417	415	3305	5588	1657.37	3.77566	0.224146	14.2347	5.5789e-46	1.98265e-43	6h_vs_0h	ENSMUSG00000024339	Tap2
ENSMUSG00000024371	45	10	47	11	186	165	78.5394	3.08549	0.750898	3.33	0.000868452	0.0334234	6h_vs_0h	ENSMUSG00000024371	C2
ENSMUSG00000024457	921	732	962	983	1700	3310	1392.01	1.75242	0.22134	5.27435	1.33226e-07	7.94743e-06	6h_vs_0h	ENSMUSG00000024457	Trim26
ENSMUSG00000024472	1884	910	2012	1335	4008	6515	2709.1	2.15623	0.333917	4.70545	2.53303e-06	0.000129783	6h_vs_0h	ENSMUSG00000024472	Dcp2
ENSMUSG00000024601	1025	665	619	592	1665	2224	1101.23	1.44619	0.242588	3.54999	0.000385243	0.0153573	6h_vs_0h	ENSMUSG00000024601	Isoc1
ENSMUSG00000024678	35	8	25	22	312	351	123.891	4.28894	0.511805	7.23701	4.58677e-13	3.99025e-11	6h_vs_0h	ENSMUSG00000024678	Ms4a4d
ENSMUSG00000024789	2744	1762	2464	1985	4143	6849	3242.12	1.4934	0.248859	3.65027	0.000261967	0.0106463	6h_vs_0h	ENSMUSG00000024789	Jak2
ENSMUSG00000024805	302	208	231	193	1178	2202	676.717	2.90476	0.256057	9.05956	1.3098e-19	1.70918e-17	6h_vs_0h	ENSMUSG00000024805	Pcgf5
ENSMUSG00000024887	271	155	160	136	511	741	316.828	1.79605	0.287337	4.21473	2.50079e-05	0.0011444	6h_vs_0h	ENSMUSG00000024887	Asah2
ENSMUSG00000025036	206	181	162	202	652	1169	409.416	2.39282	0.25456	7.10174	1.23196e-12	1.04722e-10	6h_vs_0h	ENSMUSG00000025036	Sfxn2
ENSMUSG00000025076	257	162	145	169	518	925	343.85	1.97763	0.243426	5.72095	1.05928e-08	6.91138e-07	6h_vs_0h	ENSMUSG00000025076	Casp7
ENSMUSG00000025089	951	803	588	744	3407	4748	1815.97	2.42252	0.236345	7.77472	7.56171e-15	7.71133e-13	6h_vs_0h	ENSMUSG00000025089	Gfra1
ENSMUSG00000025165	1	0	0	0	54	64	19.3627	7.13268	1.54777	4.23039	2.3329e-05	0.00107051	6h_vs_0h	ENSMUSG00000025165	Sectm1a
ENSMUSG00000025178	923	740	617	816	1967	2225	1207.53	1.58329	0.282556	3.53309	0.000410738	0.0162959	6h_vs_0h	ENSMUSG00000025178	Pi4k2a
ENSMUSG00000025324	2142	1294	1217	1116	4599	6406	2698.49	1.92463	0.242311	5.52857	3.22854e-08	2.05043e-06	6h_vs_0h	ENSMUSG00000025324	Atp10a
ENSMUSG00000025492	2607	1429	1974	2003	5096	7428	3340.18	1.88206	0.239632	5.41269	6.20863e-08	3.78477e-06	6h_vs_0h	ENSMUSG00000025492	Ifitm3
ENSMUSG00000025498	29	14	969	620	9648	11628	3796.82	9.22871	0.416468	20.7548	1.1092e-95	4.63174e-92	6h_vs_0h	ENSMUSG00000025498	Irf7
ENSMUSG00000025743	1415	1014	1021	1123	2381	3014	1641.03	1.39346	0.236896	3.41272	0.000643175	0.0250419	6h_vs_0h	ENSMUSG00000025743	Sdc3
ENSMUSG00000025746	85	87	367	323	285	705	312.935	2.61507	0.350249	5.79607	6.78874e-09	4.4997e-07	6h_vs_0h	ENSMUSG00000025746	Il6
ENSMUSG00000025790	1157	674	768	679	3134	2976	1567.35	2.05817	0.336428	4.37885	1.19308e-05	0.000569371	6h_vs_0h	ENSMUSG00000025790	Slco3a1
ENSMUSG00000025887	674	270	630	331	1986	2999	1110.96	2.6769	0.419099	4.99142	5.99379e-07	3.29323e-05	6h_vs_0h	ENSMUSG00000025887	Casp12
ENSMUSG00000026088	268	219	353	334	1016	2291	705.301	2.88887	0.27381	8.4141	3.95907e-17	4.40856e-15	6h_vs_0h	ENSMUSG00000026088	Mitd1
ENSMUSG00000026102	804	557	571	511	2151	3695	1316.43	2.29353	0.225047	7.59185	3.15376e-14	3.04493e-12	6h_vs_0h	ENSMUSG00000026102	Inpp1
ENSMUSG00000026104	291	136	946	609	5937	9044	2743.81	5.38803	0.349577	13.7396	5.88281e-43	1.96521e-40	6h_vs_0h	ENSMUSG00000026104	Stat1
ENSMUSG00000026222	10	4	43	15	838	1171	334.813	7.41556	0.589861	11.5799	5.20818e-31	1.11528e-28	6h_vs_0h	ENSMUSG00000026222	Sp100
ENSMUSG00000026269	612	466	351	507	1098	1666	758.219	1.56043	0.244161	3.99502	6.46882e-05	0.00278476	6h_vs_0h	ENSMUSG00000026269	Rnpepl1
ENSMUSG00000026433	265	166	185	170	517	841	343.589	1.86622	0.255565	5.01329	5.35062e-07	2.95932e-05	6h_vs_0h	ENSMUSG00000026433	Rab29
ENSMUSG00000026466	710	443	735	535	3456	5196	1786.13	3.13474	0.283836	8.98315	2.63129e-19	3.30454e-17	6h_vs_0h	ENSMUSG00000026466	Tor1aip1
ENSMUSG00000026535	674	546	2100	1491	15418	24497	7179.16	5.21851	0.285894	16.2071	4.49403e-59	3.12766e-56	6h_vs_0h	ENSMUSG00000026535	Ifi202b
ENSMUSG00000026536	52	34	129	87	1210	1634	512.407	5.28552	0.350224	13.4215	4.52548e-41	1.42621e-38	6h_vs_0h	ENSMUSG00000026536	Ifi211
ENSMUSG00000026797	499	295	387	302	1546	1849	801.506	2.37085	0.309112	5.77734	7.58888e-09	5.01016e-07	6h_vs_0h	ENSMUSG00000026797	Stxbp1
ENSMUSG00000026896	120	70	808	503	9976	19939	4863.34	7.47907	0.345438	19.9575	1.29079e-88	3.08002e-85	6h_vs_0h	ENSMUSG00000026896	Ifih1
ENSMUSG00000026946	59	22	43	34	602	1164	297.018	4.66305	0.374582	10.8869	1.33048e-27	2.48468e-25	6h_vs_0h	ENSMUSG00000026946	Nmi
ENSMUSG00000026971	0	3	0	1	32	87	18.2052	5.3354	1.13038	4.20248	2.64004e-05	0.00120154	6h_vs_0h	ENSMUSG00000026971	Itgb6
ENSMUSG00000027009	272	175	197	178	556	859	360.4	1.87927	0.256748	5.04103	4.6304e-07	2.58667e-05	6h_vs_0h	ENSMUSG00000027009	Itga4
ENSMUSG00000027068	220	217	162	179	504	972	357.103	1.88827	0.280711	4.64274	3.43822e-06	0.000174555	6h_vs_0h	ENSMUSG00000027068	Dhrs9
ENSMUSG00000027078	90	56	174	102	1912	2268	758.586	5.10803	0.377942	11.9675	5.25815e-33	1.21982e-30	6h_vs_0h	ENSMUSG00000027078	Ube2l6
ENSMUSG00000027293	2082	1482	1462	1491	5152	7024	3039.91	2.00218	0.219629	6.45261	1.09943e-10	8.27196e-09	6h_vs_0h	ENSMUSG00000027293	Ehd4
ENSMUSG00000027360	1	1	8	2	137	188	54.4131	7.56724	1.13124	6.17222	6.73372e-10	4.80655e-08	6h_vs_0h	ENSMUSG00000027360	Hdc
ENSMUSG00000027366	2483	1619	1440	1446	4809	6700	2983.88	1.72454	0.220305	5.17257	2.30896e-07	1.33448e-05	6h_vs_0h	ENSMUSG00000027366	Sppl2a
ENSMUSG00000027514	2	4	73	31	1444	1120	463.576	9.03676	0.77853	10.8561	1.86641e-27	3.38855e-25	6h_vs_0h	ENSMUSG00000027514	Zbp1
ENSMUSG00000027555	278	118	207	154	622	851	362.041	2.17921	0.36194	4.40462	1.05968e-05	0.000508614	6h_vs_0h	ENSMUSG00000027555	Car13
ENSMUSG00000027580	543	370	3057	2254	8589	15371	4925.78	4.89906	0.274385	15.7227	1.05786e-55	6.31054e-53	6h_vs_0h	ENSMUSG00000027580	Helz2
ENSMUSG00000027639	1208	650	1386	798	6190	9567	3184.69	3.324	0.353364	7.75122	9.10108e-15	9.21305e-13	6h_vs_0h	ENSMUSG00000027639	Samhd1
ENSMUSG00000027669	1230	1304	729	1076	4386	8002	2635.08	2.41816	0.290338	6.31386	2.72156e-10	1.99378e-08	6h_vs_0h	ENSMUSG00000027669	Gnb4
ENSMUSG00000027931	13	3	5	4	96	77	33.4929	3.82174	0.729466	4.43714	9.1162e-06	0.000440081	6h_vs_0h	ENSMUSG00000027931	Npr1
ENSMUSG00000027951	931	623	1219	1120	3997	6081	2281.8	2.91388	0.222638	10.4604	1.31305e-25	2.19319e-23	6h_vs_0h	ENSMUSG00000027951	Adar
ENSMUSG00000027962	2929	2303	2083	2189	3863	7264	3303.05	1.24809	0.20502	3.23426	0.00121959	0.0456743	6h_vs_0h	ENSMUSG00000027962	Vcam1
ENSMUSG00000027995	256	223	148	165	539	807	343.325	1.68057	0.256219	4.27591	1.90356e-05	0.000880751	6h_vs_0h	ENSMUSG00000027995	Tlr2
ENSMUSG00000028028	467	284	309	234	822	1511	572.798	1.82882	0.284614	4.37018	1.24142e-05	0.000585747	6h_vs_0h	ENSMUSG00000028028	Alpk1
ENSMUSG00000028037	32	21	583	365	11911	17245	4838.16	9.32815	0.380752	22.9628	1.09727e-116	1.83276e-112	6h_vs_0h	ENSMUSG00000028037	Ifi44
ENSMUSG00000028159	220	177	117	179	463	981	333.38	2.00137	0.294615	4.80754	1.52796e-06	8.02563e-05	6h_vs_0h	ENSMUSG00000028159	Dapp1
ENSMUSG00000028214	177	92	109	123	326	606	226.549	1.99813	0.292248	4.83538	1.32892e-06	7.02437e-05	6h_vs_0h	ENSMUSG00000028214	Gem
ENSMUSG00000028228	3318	2199	1963	2049	4424	6691	3324.22	1.22975	0.199994	3.22382	0.00126491	0.0470553	6h_vs_0h	ENSMUSG00000028228	Cpne3
ENSMUSG00000028245	1128	874	612	807	1587	2780	1240.51	1.29943	0.217019	3.29203	0.000994659	0.0377586	6h_vs_0h	ENSMUSG00000028245	Nsmaf
ENSMUSG00000028268	44	16	784	324	11038	17976	4783.05	9.17154	0.496617	17.2901	5.59002e-67	5.49236e-64	6h_vs_0h	ENSMUSG00000028268	Gbp3
ENSMUSG00000028270	437	187	1558	685	17252	26614	7466.9	6.40021	0.444186	13.0918	3.66607e-39	1.03787e-36	6h_vs_0h	ENSMUSG00000028270	Gbp2
ENSMUSG00000028362	7	12	24	18	49	63	29.5124	2.73341	0.6487	3.31187	0.000926755	0.0354224	6h_vs_0h	ENSMUSG00000028362	Tnfsf8
ENSMUSG00000028599	200	173	188	181	425	620	293.179	1.68177	0.272026	4.03186	5.53382e-05	0.00240707	6h_vs_0h	ENSMUSG00000028599	Tnfrsf1b
ENSMUSG00000028793	1144	1079	1558	1703	1982	4893	1998.44	1.71954	0.289172	3.92341	8.73035e-05	0.00371997	6h_vs_0h	ENSMUSG00000028793	Rnf19b
ENSMUSG00000028841	3	0	10	8	80	213	47.2855	6.75667	0.979349	6.30181	2.94187e-10	2.12719e-08	6h_vs_0h	ENSMUSG00000028841	Cnksr1
ENSMUSG00000028954	1545	1120	1094	1055	2676	5442	2040.38	1.76255	0.226278	5.20399	1.95051e-07	1.13914e-05	6h_vs_0h	ENSMUSG00000028954	Nub1
ENSMUSG00000028995	1150	933	663	732	2419	4080	1584.99	1.81714	0.204792	6.01652	1.78208e-09	1.24025e-07	6h_vs_0h	ENSMUSG00000028995	Fam126a
ENSMUSG00000029298	23	9	133	28	3156	4650	1276.39	8.19512	0.639954	11.8917	1.30759e-32	2.95145e-30	6h_vs_0h	ENSMUSG00000029298	Gbp9
ENSMUSG00000029321	29	9	51	24	120	100	57.998	2.91645	0.648933	3.59274	0.000327224	0.0131702	6h_vs_0h	ENSMUSG00000029321	Slc10a6
ENSMUSG00000029322	129	75	99	102	1547	1220	543.322	4.11132	0.398443	8.85025	8.73244e-19	1.08043e-16	6h_vs_0h	ENSMUSG00000029322	Plac8
ENSMUSG00000029330	50	22	33	24	184	227	87.8874	2.79882	0.439579	5.03621	4.74829e-07	2.64369e-05	6h_vs_0h	ENSMUSG00000029330	Cds1
ENSMUSG00000029405	3247	2393	2132	1996	5930	8919	3966.05	1.60413	0.214344	4.75467	1.98772e-06	0.000102789	6h_vs_0h	ENSMUSG00000029405	G3bp2
ENSMUSG00000029417	0	1	7	4	78	123	34.0516	7.83463	1.47273	4.92257	8.54156e-07	4.61714e-05	6h_vs_0h	ENSMUSG00000029417	Cxcl9
ENSMUSG00000029426	2266	1891	1591	1806	3813	6924	2925.19	1.52751	0.208743	4.51519	6.32588e-06	0.000310768	6h_vs_0h	ENSMUSG00000029426	Scarb2
ENSMUSG00000029561	8	4	189	78	4665	5486	1714.68	9.99667	0.613879	15.3315	4.71196e-53	2.31482e-50	6h_vs_0h	ENSMUSG00000029561	Oasl2
ENSMUSG00000029605	19	9	278	152	955	1549	485.283	6.70358	0.467348	13.0921	3.65215e-39	1.03787e-36	6h_vs_0h	ENSMUSG00000029605	Oas1b
ENSMUSG00000029640	914	798	584	650	1536	3569	1254.41	1.68694	0.267005	4.12704	3.6747e-05	0.00164996	6h_vs_0h	ENSMUSG00000029640	Usp12
ENSMUSG00000029771	169	107	91	114	1081	2369	599.722	3.80067	0.272704	11.7918	4.30237e-32	9.3328e-30	6h_vs_0h	ENSMUSG00000029771	Irf5
ENSMUSG00000029780	360	242	203	202	950	1821	589.711	2.37731	0.234205	7.65274	1.96735e-14	1.93298e-12	6h_vs_0h	ENSMUSG00000029780	Nt5c3
ENSMUSG00000029798	41	23	97	49	1737	2742	743.147	6.35076	0.404541	14.2526	4.31933e-46	1.56839e-43	6h_vs_0h	ENSMUSG00000029798	Herc6
ENSMUSG00000029826	1486	1101	2276	2089	8182	12629	4529.26	3.21028	0.216968	12.0998	1.05839e-33	2.56208e-31	6h_vs_0h	ENSMUSG00000029826	Zc3hav1
ENSMUSG00000029923	1	1	4	1	41	61	17.4952	5.87733	1.22755	4.3113	1.62298e-05	0.000759344	6h_vs_0h	ENSMUSG00000029923	Rab19
ENSMUSG00000030088	49	28	44	30	176	198	87.0029	2.56044	0.438094	4.50917	6.50819e-06	0.000318787	6h_vs_0h	ENSMUSG00000030088	Aldh1l1
ENSMUSG00000030102	2669	1503	1496	1296	5213	6362	3011.93	1.75034	0.283702	4.10761	3.99776e-05	0.00178542	6h_vs_0h	ENSMUSG00000030102	Itpr1
ENSMUSG00000030107	16	12	1273	816	7979	16819	4196.67	9.9392	0.430425	21.7325	1.01194e-104	8.45123e-101	6h_vs_0h	ENSMUSG00000030107	Usp18
ENSMUSG00000030157	612	407	1296	1095	2164	3412	1505.67	2.66285	0.243218	8.54315	1.30608e-17	1.48404e-15	6h_vs_0h	ENSMUSG00000030157	Clec2d
ENSMUSG00000030275	1996	1536	1499	1403	6495	12558	3999.62	2.58852	0.222428	9.00751	2.10785e-19	2.68758e-17	6h_vs_0h	ENSMUSG00000030275	Etnk1
ENSMUSG00000030921	6	3	21	8	2079	2579	762.563	9.27169	0.601936	14.4312	3.29063e-47	1.24917e-44	6h_vs_0h	ENSMUSG00000030921	Trim30a
ENSMUSG00000030966	151	113	1382	994	2071	4600	1531.19	4.79645	0.317113	13.2806	2.99926e-40	8.94583e-38	6h_vs_0h	ENSMUSG00000030966	Trim21
ENSMUSG00000031230	15	11	33	15	101	189	58.1988	3.65101	0.551477	5.55964	2.70337e-08	1.72345e-06	6h_vs_0h	ENSMUSG00000031230	Fgf16
ENSMUSG00000031266	244	207	160	223	511	981	368.885	1.87578	0.269174	4.79532	1.62412e-06	8.45098e-05	6h_vs_0h	ENSMUSG00000031266	Gla
ENSMUSG00000031557	669	528	371	328	1289	2439	881.093	1.79764	0.242798	4.99445	5.90023e-07	3.25253e-05	6h_vs_0h	ENSMUSG00000031557	Plekha2
ENSMUSG00000031639	44	23	172	66	2118	3357	919.105	6.58252	0.478129	12.5437	4.3033e-36	1.14092e-33	6h_vs_0h	ENSMUSG00000031639	Tlr3
ENSMUSG00000031652	1173	835	1085	1054	2256	4075	1689.95	1.83537	0.209094	5.97992	2.23251e-09	1.54089e-07	6h_vs_0h	ENSMUSG00000031652	N4bp1
ENSMUSG00000031712	9	10	10	5	96	245	56.3798	4.26149	0.576998	6.37175	1.86886e-10	1.38736e-08	6h_vs_0h	ENSMUSG00000031712	Il15
ENSMUSG00000031762	138	131	246	293	362	491	283.89	1.86409	0.292681	4.37024	1.24108e-05	0.000585747	6h_vs_0h	ENSMUSG00000031762	Mt2
ENSMUSG00000031897	288	180	334	274	3304	5708	1588.9	4.46757	0.254946	15.229	2.2709e-52	1.05363e-49	6h_vs_0h	ENSMUSG00000031897	Psmb10
ENSMUSG00000032265	290	126	571	291	1276	1864	732.393	3.18775	0.420398	6.19116	5.97233e-10	4.28137e-08	6h_vs_0h	ENSMUSG00000032265	Tent5a
ENSMUSG00000032322	49	47	22	27	220	325	109.812	2.69306	0.355158	5.93555	2.92857e-09	1.98444e-07	6h_vs_0h	ENSMUSG00000032322	Pstpip1
ENSMUSG00000032333	646	442	419	405	1078	1476	725.42	1.4637	0.239869	3.66323	0.000249052	0.0101461	6h_vs_0h	ENSMUSG00000032333	Stoml1
ENSMUSG00000032344	169	114	193	161	317	509	240.709	1.75011	0.2853	4.08382	4.43012e-05	0.00195241	6h_vs_0h	ENSMUSG00000032344	Cgas
ENSMUSG00000032372	109	65	192	122	1347	2605	694.067	4.68923	0.338929	12.1094	9.41672e-34	2.31305e-31	6h_vs_0h	ENSMUSG00000032372	Plscr2
ENSMUSG00000032410	1639	974	1340	1000	3020	4993	2085.68	1.83253	0.277267	4.4994	6.8147e-06	0.000332824	6h_vs_0h	ENSMUSG00000032410	Xrn1
ENSMUSG00000032508	658	474	938	857	2056	3322	1365.24	2.44545	0.222332	8.3679	5.86528e-17	6.48793e-15	6h_vs_0h	ENSMUSG00000032508	Myd88
ENSMUSG00000032515	490	366	1058	1101	893	1502	931.212	1.67053	0.208879	5.19692	2.02619e-07	1.17922e-05	6h_vs_0h	ENSMUSG00000032515	Csrnp1
ENSMUSG00000032548	623	536	420	547	1014	2295	854.438	1.6311	0.271043	3.85954	0.000113599	0.0047318	6h_vs_0h	ENSMUSG00000032548	Slco2a1
ENSMUSG00000032596	154	80	540	264	2798	3536	1223.09	5.03627	0.419174	10.6191	2.42773e-26	4.224e-24	6h_vs_0h	ENSMUSG00000032596	Uba7
ENSMUSG00000032661	0	0	9	5	419	719	179.949	11.7621	1.47795	7.56254	3.95263e-14	3.75118e-12	6h_vs_0h	ENSMUSG00000032661	Oas3
ENSMUSG00000032690	0	1	11	7	527	853	220.17	10.6151	1.41493	7.08877	1.35311e-12	1.14147e-10	6h_vs_0h	ENSMUSG00000032690	Oas2
ENSMUSG00000032698	4	2	11	4	225	341	93.392	6.77698	0.714147	8.67046	4.30378e-18	5.0983e-16	6h_vs_0h	ENSMUSG00000032698	Lmo2
ENSMUSG00000032712	1082	763	713	687	1364	2862	1179.23	1.34942	0.236991	3.22552	0.00125744	0.0468818	6h_vs_0h	ENSMUSG00000032712	Resf1
ENSMUSG00000033088	1080	729	715	819	1800	2632	1261.61	1.51541	0.209819	4.43434	9.23555e-06	0.000444557	6h_vs_0h	ENSMUSG00000033088	Triobp
ENSMUSG00000033213	0	0	3	5	32	131	24.6113	8.82652	1.60561	5.13294	2.85244e-07	1.62056e-05	6h_vs_0h	ENSMUSG00000033213	AA467197
ENSMUSG00000033355	20	14	538	320	1664	2441	833.798	7.13311	0.427278	15.3252	5.19085e-53	2.47722e-50	6h_vs_0h	ENSMUSG00000033355	Rtp4
ENSMUSG00000033487	1738	1096	1238	1164	5097	8833	3038.87	2.49755	0.216186	8.84677	9.00924e-19	1.10648e-16	6h_vs_0h	ENSMUSG00000033487	Fndc3a
ENSMUSG00000033538	13	16	122	60	189	416	133.305	4.48832	0.531018	7.35065	1.97252e-13	1.7906e-11	6h_vs_0h	ENSMUSG00000033538	Casp4
ENSMUSG00000033576	41	15	158	54	1566	1897	614.979	6.26041	0.548635	10.3446	4.42746e-25	7.11076e-23	6h_vs_0h	ENSMUSG00000033576	Apol6
ENSMUSG00000033715	48	30	43	27	190	268	98.0654	2.78664	0.406026	5.42242	5.87974e-08	3.61064e-06	6h_vs_0h	ENSMUSG00000033715	Akr1c14
ENSMUSG00000033781	156	142	101	131	789	1198	402.542	2.92192	0.268884	8.69117	3.58728e-18	4.31068e-16	6h_vs_0h	ENSMUSG00000033781	Asb13
ENSMUSG00000033847	8	6	10	2	72	95	31.3289	3.80614	0.71795	4.48658	7.23755e-06	0.000352446	6h_vs_0h	ENSMUSG00000033847	Pla2g4c
ENSMUSG00000033880	230	97	300	203	3001	3702	1234.29	4.66127	0.374438	10.8864	1.33881e-27	2.48468e-25	6h_vs_0h	ENSMUSG00000033880	Lgals3bp
ENSMUSG00000034218	913	603	532	528	2097	4178	1380.49	2.2194	0.225291	7.25463	4.02752e-13	3.55934e-11	6h_vs_0h	ENSMUSG00000034218	Atm
ENSMUSG00000034422	84	59	1342	687	9547	16068	4436.12	7.67749	0.389288	18.2191	3.63904e-74	5.06524e-71	6h_vs_0h	ENSMUSG00000034422	Parp14
ENSMUSG00000034459	23	13	11294	3981	27963	48309	15063.8	11.2536	0.533597	19.9938	6.23136e-89	1.73471e-85	6h_vs_0h	ENSMUSG00000034459	Ifit1
ENSMUSG00000034484	1014	866	535	732	1559	2793	1190.61	1.36957	0.238012	3.29637	0.000979439	0.0372655	6h_vs_0h	ENSMUSG00000034484	Snx2
ENSMUSG00000034485	1184	1088	591	980	2686	5770	1912.97	2.01321	0.30199	4.72934	2.25252e-06	0.000116123	6h_vs_0h	ENSMUSG00000034485	Uaca
ENSMUSG00000034575	1229	805	1210	1040	2109	3087	1562.04	1.57938	0.243478	4.08407	4.42545e-05	0.00195241	6h_vs_0h	ENSMUSG00000034575	Tent4a
ENSMUSG00000034610	426	263	268	267	547	1093	452.584	1.42864	0.25073	3.36475	0.000766142	0.0296224	6h_vs_0h	ENSMUSG00000034610	Tut4
ENSMUSG00000034708	1843	1345	1066	1510	3426	5550	2363.77	1.68862	0.222682	4.95602	7.19522e-07	3.91472e-05	6h_vs_0h	ENSMUSG00000034708	Grn
ENSMUSG00000034855	5	6	547	235	17719	29347	7519.93	12.2364	0.610028	19.0997	2.53831e-81	5.29968e-78	6h_vs_0h	ENSMUSG00000034855	Cxcl10
ENSMUSG00000034947	70	53	91	111	942	1360	423.977	4.44009	0.274993	14.0188	1.19549e-44	4.16007e-42	6h_vs_0h	ENSMUSG00000034947	Tmem106a
ENSMUSG00000034997	777	591	602	677	1423	2891	1105.39	1.80759	0.223863	5.46133	4.72589e-08	2.94539e-06	6h_vs_0h	ENSMUSG00000034997	Htr2a
ENSMUSG00000035021	1150	997	662	934	1808	3441	1427.04	1.43562	0.249422	3.41038	0.000648722	0.0251991	6h_vs_0h	ENSMUSG00000035021	Baz1a
ENSMUSG00000035151	577	390	381	332	1213	2188	803.446	1.99927	0.239788	5.89798	3.67972e-09	2.46837e-07	6h_vs_0h	ENSMUSG00000035151	Elmod2
ENSMUSG00000035208	8	1	38	12	299	506	137.064	6.72957	0.722706	8.50218	1.86062e-17	2.09986e-15	6h_vs_0h	ENSMUSG00000035208	Slfn8
ENSMUSG00000035248	2058	1394	1271	1220	2989	5041	2230.67	1.41476	0.205906	4.0298	5.5825e-05	0.00242194	6h_vs_0h	ENSMUSG00000035248	Tut7
ENSMUSG00000035273	39	38	39	40	111	160	70.0246	2.00512	0.39735	3.57398	0.000351595	0.014117	6h_vs_0h	ENSMUSG00000035273	Hpse
ENSMUSG00000035373	647	287	3470	1948	4521	7208	3088.23	3.90564	0.385796	8.60723	7.48473e-18	8.74248e-16	6h_vs_0h	ENSMUSG00000035373	Ccl7
ENSMUSG00000035385	1218	428	2972	1651	8010	11325	4254.7	3.85693	0.429299	7.62157	2.50607e-14	2.44789e-12	6h_vs_0h	ENSMUSG00000035385	Ccl2
ENSMUSG00000035505	412	375	388	447	751	1853	667.195	1.8234	0.29494	4.19881	2.68327e-05	0.0012146	6h_vs_0h	ENSMUSG00000035505	Cox18
ENSMUSG00000035517	823	563	852	736	3543	6497	2063.26	3.03725	0.234797	10.4441	1.55884e-25	2.57796e-23	6h_vs_0h	ENSMUSG00000035517	Tdrd7
ENSMUSG00000035561	19	33	16	21	220	562	131.085	3.95512	0.481987	6.99213	2.70745e-12	2.26113e-10	6h_vs_0h	ENSMUSG00000035561	Aldh1b1
ENSMUSG00000035566	89	22	63	30	261	490	148.908	3.02904	0.548387	4.45678	8.31991e-06	0.000403975	6h_vs_0h	ENSMUSG00000035566	Pcdh17
ENSMUSG00000035692	30	9	839	607	6589	9761	2894.41	8.97316	0.408284	20.5449	8.54219e-94	2.8536e-90	6h_vs_0h	ENSMUSG00000035692	Isg15
ENSMUSG00000035852	1	1	7	6	75	190	42.2749	7.17091	1.13193	5.81833	5.944e-09	3.95549e-07	6h_vs_0h	ENSMUSG00000035852	Misp
ENSMUSG00000035929	69	34	149	66	2513	3152	975.784	6.06192	0.446921	12.2548	1.58392e-34	4.00852e-32	6h_vs_0h	ENSMUSG00000035929	H2-Q4
ENSMUSG00000036249	182	157	192	182	1092	1691	562.17	3.224	0.253314	10.4179	2.05415e-25	3.36378e-23	6h_vs_0h	ENSMUSG00000036249	Rbm43
ENSMUSG00000036461	919	553	825	662	1759	2872	1228.71	1.86979	0.261881	4.90602	9.29429e-07	4.97572e-05	6h_vs_0h	ENSMUSG00000036461	Elf1
ENSMUSG00000036833	180	197	122	160	843	1830	514.519	2.92526	0.316245	7.40014	1.36036e-13	1.26234e-11	6h_vs_0h	ENSMUSG00000036833	Pnpla7
ENSMUSG00000036908	240	116	118	118	465	760	287.033	2.0191	0.296246	4.84092	1.29242e-06	6.87496e-05	6h_vs_0h	ENSMUSG00000036908	Unc93b1
ENSMUSG00000036912	0	2	1	2	49	80	21.1256	6.16235	1.19049	4.68493	2.80054e-06	0.00014305	6h_vs_0h	ENSMUSG00000036912	Piwil4
ENSMUSG00000036986	607	275	655	515	2576	3050	1274.3	2.98008	0.343271	6.97723	3.01051e-12	2.48933e-10	6h_vs_0h	ENSMUSG00000036986	Pml
ENSMUSG00000037075	1203	814	1015	718	2053	3445	1489.33	1.64453	0.283793	3.73348	0.000188855	0.00778877	6h_vs_0h	ENSMUSG00000037075	Rnf139
ENSMUSG00000037242	12177	9903	8086	8888	24306	40404	16614.1	1.72846	0.194997	5.86401	4.51827e-09	3.01875e-07	6h_vs_0h	ENSMUSG00000037242	Clic4
ENSMUSG00000037321	389	206	1262	811	8739	16527	4391.05	5.61164	0.332547	15.1156	1.27816e-51	5.77002e-49	6h_vs_0h	ENSMUSG00000037321	Tap1
ENSMUSG00000037419	542	465	365	524	2459	3866	1314.38	2.83314	0.247486	9.08388	1.04773e-19	1.37797e-17	6h_vs_0h	ENSMUSG00000037419	Endod1
ENSMUSG00000037440	32	10	24	20	157	240	77.0841	3.50468	0.475664	6.13811	8.35064e-10	5.93535e-08	6h_vs_0h	ENSMUSG00000037440	Vnn1
ENSMUSG00000037490	47	28	25	27	111	183	66.6558	2.17997	0.388253	4.10806	3.98989e-05	0.00178542	6h_vs_0h	ENSMUSG00000037490	Slc2a12
ENSMUSG00000037622	547	331	317	328	1410	1997	792.988	2.1965	0.238171	6.76615	1.32256e-11	1.04695e-09	6h_vs_0h	ENSMUSG00000037622	Wdtc1
ENSMUSG00000037685	35	27	28	37	73	145	54.9966	1.97322	0.42182	3.29103	0.00099821	0.0378075	6h_vs_0h	ENSMUSG00000037685	Atp8a1
ENSMUSG00000037816	296	231	156	216	451	925	357.191	1.53213	0.268884	3.52244	0.00042759	0.0168843	6h_vs_0h	ENSMUSG00000037816	Fbxw17
ENSMUSG00000037826	231	201	266	246	1036	2030	633.963	2.97045	0.261274	9.13006	6.84592e-20	9.1478e-18	6h_vs_0h	ENSMUSG00000037826	Ppm1k
ENSMUSG00000037921	2	3	84	22	1661	4128	884.12	10.2768	0.840096	11.5365	8.63897e-31	1.82654e-28	6h_vs_0h	ENSMUSG00000037921	Ddx60
ENSMUSG00000037940	48	19	34	16	147	218	76.9908	2.71112	0.507519	4.18924	2.79894e-05	0.00126353	6h_vs_0h	ENSMUSG00000037940	Inpp4b
ENSMUSG00000037997	328	225	247	225	1793	3276	954.351	3.37698	0.233704	11.9467	6.75935e-33	1.5466e-30	6h_vs_0h	ENSMUSG00000037997	Parp11
ENSMUSG00000038037	209	95	2390	1181	1355	2041	1320.18	3.74192	0.420866	7.50101	6.33288e-14	5.94259e-12	6h_vs_0h	ENSMUSG00000038037	Socs1
ENSMUSG00000038058	376	314	300	341	1131	1899	698.615	2.30902	0.224187	7.69009	1.47034e-14	1.46185e-12	6h_vs_0h	ENSMUSG00000038058	Nod1
ENSMUSG00000038213	114	131	87	100	468	955	289.558	2.64582	0.327627	6.29013	3.17201e-10	2.28371e-08	6h_vs_0h	ENSMUSG00000038213	Tapbpl
ENSMUSG00000038301	160	155	95	132	333	1109	297.77	2.23876	0.400568	4.12855	3.65056e-05	0.00164354	6h_vs_0h	ENSMUSG00000038301	Snx10
ENSMUSG00000038418	260	167	299	271	379	620	330.872	1.43313	0.258469	3.28137	0.00103306	0.0390388	6h_vs_0h	ENSMUSG00000038418	Egr1
ENSMUSG00000038507	499	351	726	576	7885	14913	3887.5	4.91694	0.257163	16.8451	1.13916e-63	8.64884e-61	6h_vs_0h	ENSMUSG00000038507	Parp12
ENSMUSG00000038774	2841	1782	1708	1660	6474	10336	3952.08	2.07832	0.210286	7.10139	1.23512e-12	1.04722e-10	6h_vs_0h	ENSMUSG00000038774	Ascc3
ENSMUSG00000038884	125	51	119	103	506	767	269.674	3.11691	0.349157	7.2515	4.12183e-13	3.62353e-11	6h_vs_0h	ENSMUSG00000038884	A230050P20Rik
ENSMUSG00000039146	0	0	2	1	791	1184	313.256	12.5818	1.47237	8.14792	3.70224e-16	3.964e-14	6h_vs_0h	ENSMUSG00000039146	Ifi44l
ENSMUSG00000039236	24	21	36	22	396	529	166.83	4.57955	0.410273	9.73633	2.11045e-22	3.20463e-20	6h_vs_0h	ENSMUSG00000039236	Isg20
ENSMUSG00000039285	1544	1175	1006	1099	2653	4558	1923.86	1.58686	0.194452	5.1522	2.57454e-07	1.47571e-05	6h_vs_0h	ENSMUSG00000039285	Azi2
ENSMUSG00000039304	2	2	30	15	438	609	177.228	8.25275	0.815279	9.40506	5.19999e-21	7.23796e-19	6h_vs_0h	ENSMUSG00000039304	Tnfsf10
ENSMUSG00000039501	1151	705	1936	1547	6386	10373	3591.31	3.39	0.256483	10.9364	7.7223e-28	1.46574e-25	6h_vs_0h	ENSMUSG00000039501	Znfx1
ENSMUSG00000039531	252	221	304	210	489	1366	444.058	2.05283	0.375031	3.91389	9.08226e-05	0.00386008	6h_vs_0h	ENSMUSG00000039531	Zup1
ENSMUSG00000039616	80	74	47	73	416	752	226.238	3.07771	0.314228	7.93279	2.14269e-15	2.23684e-13	6h_vs_0h	ENSMUSG00000039616	Mocos
ENSMUSG00000039697	279	211	567	382	2279	4003	1237.62	3.85721	0.303509	10.7813	4.21947e-27	7.49764e-25	6h_vs_0h	ENSMUSG00000039697	Ncoa7
ENSMUSG00000039699	2	3	11	9	100	350	69.3144	6.54558	0.816294	7.302	2.83515e-13	2.54599e-11	6h_vs_0h	ENSMUSG00000039699	Batf2
ENSMUSG00000039853	0	0	6	3	260	514	120.185	11.1818	1.48699	7.12633	1.03078e-12	8.8293e-11	6h_vs_0h	ENSMUSG00000039853	Trim14
ENSMUSG00000039899	464	363	668	463	2801	5050	1561.02	3.41488	0.294091	9.62247	6.42662e-22	9.58427e-20	6h_vs_0h	ENSMUSG00000039899	Fgl2
ENSMUSG00000039911	287	185	428	291	637	859	452.297	1.90625	0.326197	4.05048	5.11136e-05	0.00223495	6h_vs_0h	ENSMUSG00000039911	Spsb1
ENSMUSG00000039983	318	271	185	189	696	1180	450.307	1.84183	0.241274	5.20913	1.89726e-07	1.11193e-05	6h_vs_0h	ENSMUSG00000039983	Ccdc32
ENSMUSG00000039997	94	76	945	560	6422	8757	2766.77	6.6974	0.359806	16.988	1.00727e-64	8.41222e-62	6h_vs_0h	ENSMUSG00000039997	Ifi203
ENSMUSG00000040033	668	362	2986	2361	9178	12393	4696.26	4.65125	0.290651	13.9901	1.79099e-44	6.10509e-42	6h_vs_0h	ENSMUSG00000040033	Stat2
ENSMUSG00000040043	955	865	657	861	2481	4010	1578.81	2.00458	0.238864	5.94307	2.79727e-09	1.91487e-07	6h_vs_0h	ENSMUSG00000040043	Rbms2
ENSMUSG00000040253	141	59	1416	688	8760	13965	4032.63	7.08436	0.430218	15.1071	1.45338e-51	6.38835e-49	6h_vs_0h	ENSMUSG00000040253	Gbp7
ENSMUSG00000040264	286	159	1519	573	29743	48128	12702.6	7.67801	0.457182	15.5146	2.76173e-54	1.44154e-51	6h_vs_0h	ENSMUSG00000040264	Gbp2b
ENSMUSG00000040296	843	617	1411	1463	4695	12458	3318.23	3.66348	0.285498	10.7828	4.14886e-27	7.45145e-25	6h_vs_0h	ENSMUSG00000040296	Ddx58
ENSMUSG00000040328	5	0	18	12	581	1030	256.387	8.53529	0.722002	11.0114	3.36549e-28	6.46135e-26	6h_vs_0h	ENSMUSG00000040328	Olfr56
ENSMUSG00000040329	31	26	20	25	162	293	87.3461	3.16467	0.380632	6.77733	1.22421e-11	9.73715e-10	6h_vs_0h	ENSMUSG00000040329	Il7
ENSMUSG00000040414	371	262	285	287	714	1259	509.06	1.82424	0.225117	5.50488	3.69422e-08	2.33729e-06	6h_vs_0h	ENSMUSG00000040414	Slc25a28
ENSMUSG00000040428	295	113	429	233	2406	3187	1089.75	4.07956	0.425992	8.20335	2.33788e-16	2.53569e-14	6h_vs_0h	ENSMUSG00000040428	Plekha4
ENSMUSG00000040483	147	40	492	296	3310	3826	1354.51	5.60877	0.476489	10.5433	5.45526e-26	9.39374e-24	6h_vs_0h	ENSMUSG00000040483	Xaf1
ENSMUSG00000040613	54	74	125	99	560	1436	360.316	4.0158	0.4101	8.36576	5.97269e-17	6.56328e-15	6h_vs_0h	ENSMUSG00000040613	Apobec1
ENSMUSG00000041645	1871	1417	1464	1701	3079	6109	2498.74	1.63719	0.210925	4.98844	6.08677e-07	3.33335e-05	6h_vs_0h	ENSMUSG00000041645	Ddx24
ENSMUSG00000041827	0	0	328	174	2972	5794	1446.53	14.6845	1.49336	9.44145	3.67671e-21	5.16069e-19	6h_vs_0h	ENSMUSG00000041827	Oasl1
ENSMUSG00000041945	133	101	59	79	318	504	189.255	2.00793	0.280773	5.06792	4.02187e-07	2.2695e-05	6h_vs_0h	ENSMUSG00000041945	Mfsd9
ENSMUSG00000042106	372	224	590	462	552	995	535.715	1.57394	0.283136	3.49281	0.000477967	0.0187847	6h_vs_0h	ENSMUSG00000042106	Inka1
ENSMUSG00000042228	151	136	108	123	261	485	201.891	1.52899	0.284726	3.31544	0.000914984	0.0350527	6h_vs_0h	ENSMUSG00000042228	Lyn
ENSMUSG00000042333	35	16	44	29	128	175	70.3169	2.83198	0.468032	4.80091	1.57945e-06	8.24423e-05	6h_vs_0h	ENSMUSG00000042333	Tnfrsf14
ENSMUSG00000042350	1312	869	755	797	2488	4342	1672.78	1.84007	0.199002	6.3068	2.84858e-10	2.07772e-08	6h_vs_0h	ENSMUSG00000042350	Arel1
ENSMUSG00000042726	903	686	632	599	3980	7212	2199.29	2.98676	0.215301	11.1554	6.7407e-29	1.32459e-26	6h_vs_0h	ENSMUSG00000042726	Trafd1
ENSMUSG00000042772	1097	638	813	704	1954	2677	1285.38	1.66856	0.264501	4.09664	4.19189e-05	0.00186216	6h_vs_0h	ENSMUSG00000042772	Smg7
ENSMUSG00000042812	139	102	143	152	419	833	284.373	2.53743	0.265486	7.35417	1.92121e-13	1.75355e-11	6h_vs_0h	ENSMUSG00000042812	Foxf1
ENSMUSG00000042842	127	69	68	52	304	469	172.75	2.21232	0.330714	4.92064	8.62622e-07	4.64786e-05	6h_vs_0h	ENSMUSG00000042842	Serpinb6b
ENSMUSG00000042901	1403	1057	904	924	3129	4754	1956.07	1.88316	0.205022	6.33183	2.42264e-10	1.78262e-08	6h_vs_0h	ENSMUSG00000042901	Aida
ENSMUSG00000043263	0	2	4	3	190	462	98.992	8.45742	1.09286	7.2035	5.8687e-13	5.05283e-11	6h_vs_0h	ENSMUSG00000043263	Ifi209
ENSMUSG00000043811	47	15	44	30	162	215	83.8269	2.90289	0.492057	4.71062	2.46967e-06	0.000126926	6h_vs_0h	ENSMUSG00000043811	Rtn4r
ENSMUSG00000043953	5	1	26	16	681	1471	334.866	8.65118	0.680926	11.8459	2.25978e-32	4.96647e-30	6h_vs_0h	ENSMUSG00000043953	Ccrl2
ENSMUSG00000044703	0	0	0	0	66	188	37.2002	9.51619	1.55688	5.73661	9.65891e-09	6.32677e-07	6h_vs_0h	ENSMUSG00000044703	Phf11a
ENSMUSG00000045795	176	169	113	185	505	1049	344.459	2.29332	0.322853	5.29133	1.2143e-07	7.26971e-06	6h_vs_0h	ENSMUSG00000045795	Whamm
ENSMUSG00000045827	446	209	260	197	1953	2603	912.456	3.07856	0.328726	7.58553	3.31131e-14	3.17866e-12	6h_vs_0h	ENSMUSG00000045827	Serpinb9
ENSMUSG00000045932	638	363	989	589	30965	47793	12879.3	6.53105	0.337978	17.593	2.78619e-69	3.32412e-66	6h_vs_0h	ENSMUSG00000045932	Ifit2
ENSMUSG00000046031	1	1	10	13	56	142	34.3236	6.75112	1.14126	5.4029	6.55716e-08	3.9827e-06	6h_vs_0h	ENSMUSG00000046031	Calhm6
ENSMUSG00000046157	60	32	49	31	374	354	150.984	3.30536	0.448087	6.07106	1.27065e-09	8.91752e-08	6h_vs_0h	ENSMUSG00000046157	Tmem229b
ENSMUSG00000046688	83	79	97	64	334	695	212.245	2.79249	0.366815	6.01799	1.76599e-09	1.2342e-07	6h_vs_0h	ENSMUSG00000046688	Tifa
ENSMUSG00000046718	146	136	414	378	4334	5674	1813.14	5.35915	0.280787	17.0028	7.83361e-65	6.88657e-62	6h_vs_0h	ENSMUSG00000046718	Bst2
ENSMUSG00000046805	15	5	23	9	289	352	113.451	5.29329	0.570897	8.24718	1.62174e-16	1.77046e-14	6h_vs_0h	ENSMUSG00000046805	Mpeg1
ENSMUSG00000046879	364	344	4164	2794	11663	18498	6274.67	5.58196	0.318554	15.6864	1.87443e-55	1.0499e-52	6h_vs_0h	ENSMUSG00000046879	Irgm1
ENSMUSG00000047067	53	56	43	49	427	754	217.186	3.5875	0.320202	9.3769	6.79386e-21	9.37833e-19	6h_vs_0h	ENSMUSG00000047067	Dusp28
ENSMUSG00000047098	514	337	858	656	1200	1749	895.26	2.01955	0.278455	5.15181	2.57981e-07	1.47571e-05	6h_vs_0h	ENSMUSG00000047098	Rnf31
ENSMUSG00000047735	814	406	2540	1553	13246	23828	6742.59	5.14589	0.347862	13.1112	2.84094e-39	8.32496e-37	6h_vs_0h	ENSMUSG00000047735	Samd9l
ENSMUSG00000048186	8	6	4	3	59	107	29.0086	3.74427	0.633709	4.98536	6.18457e-07	3.37584e-05	6h_vs_0h	ENSMUSG00000048186	Bend7
ENSMUSG00000048388	352	282	242	278	837	1136	509.472	1.85425	0.247914	5.11974	3.0596e-07	1.73236e-05	6h_vs_0h	ENSMUSG00000048388	Fam171b
ENSMUSG00000048852	0	2	34	8	349	636	161.296	9.08445	1.15066	7.38659	1.50641e-13	1.39014e-11	6h_vs_0h	ENSMUSG00000048852	Gm12185
ENSMUSG00000048897	293	192	225	219	423	681	329.643	1.39425	0.245469	3.29673	0.000978162	0.0372655	6h_vs_0h	ENSMUSG00000048897	Zfp710
ENSMUSG00000049191	244	173	136	133	472	601	285.298	1.60397	0.279575	3.6447	0.000267704	0.0108268	6h_vs_0h	ENSMUSG00000049191	Rtl5
ENSMUSG00000049401	1576	1403	1316	1588	2871	5825	2329.5	1.67672	0.240372	4.54178	5.57823e-06	0.00027566	6h_vs_0h	ENSMUSG00000049401	Ogfr
ENSMUSG00000049488	200	133	108	126	452	646	267.625	1.94764	0.261504	5.21077	1.88058e-07	1.10646e-05	6h_vs_0h	ENSMUSG00000049488	Tmem67
ENSMUSG00000049502	291	151	1849	1118	5917	8711	2993.43	5.29926	0.353006	13.3546	1.11358e-40	3.38183e-38	6h_vs_0h	ENSMUSG00000049502	Dtx3l
ENSMUSG00000049659	1101	1061	708	894	2054	4692	1641.28	1.7429	0.281937	4.10693	4.00945e-05	0.00178586	6h_vs_0h	ENSMUSG00000049659	Aftph
ENSMUSG00000050002	225	219	157	200	534	1081	380.824	1.98798	0.286763	4.89247	9.95783e-07	5.31392e-05	6h_vs_0h	ENSMUSG00000050002	Idnk
ENSMUSG00000050014	3	2	3	5	100	155	42.4752	5.87933	0.788523	6.71425	1.89042e-11	1.4755e-09	6h_vs_0h	ENSMUSG00000050014	Apol10b
ENSMUSG00000050370	239	225	708	784	947	2828	918.647	3.08668	0.343314	7.28688	3.17221e-13	2.81838e-11	6h_vs_0h	ENSMUSG00000050370	Ch25h
ENSMUSG00000050565	3875	2448	3178	2801	10000	14419	5963.92	2.18321	0.237081	6.74123	1.57056e-11	1.23741e-09	6h_vs_0h	ENSMUSG00000050565	Tor1aip2
ENSMUSG00000051790	636	318	585	355	1884	1751	932.548	2.27062	0.414039	4.07116	4.67805e-05	0.00205085	6h_vs_0h	ENSMUSG00000051790	Nlgn2
ENSMUSG00000052776	8	0	25	12	982	1839	442.747	8.77531	1.16222	7.04712	1.82653e-12	1.53309e-10	6h_vs_0h	ENSMUSG00000052776	Oas1a
ENSMUSG00000053093	4	1	0	1	25	40	11.0263	3.94607	1.04576	3.214	0.00130898	0.0485864	6h_vs_0h	ENSMUSG00000053093	Myh7
ENSMUSG00000053263	5	1	3	1	31	41	13.1672	3.87205	0.980499	3.35243	0.00080106	0.0309009	6h_vs_0h	ENSMUSG00000053263	NA
ENSMUSG00000053835	7	2	16	13	228	246	85.3441	6.01422	0.643444	8.43775	3.23502e-17	3.62648e-15	6h_vs_0h	ENSMUSG00000053835	H2-T24
ENSMUSG00000053846	119	111	68	77	731	899	326.246	3.04519	0.307725	7.99476	1.29822e-15	1.36379e-13	6h_vs_0h	ENSMUSG00000053846	Lipg
ENSMUSG00000054072	24	15	5258	1496	29486	42832	12919.1	11.0863	0.574488	18.2794	1.20804e-74	2.01779e-71	6h_vs_0h	ENSMUSG00000054072	Iigp1
ENSMUSG00000054203	11	10	152	85	1649	2281	680.498	7.76336	0.479476	14.9713	1.13167e-50	4.72555e-48	6h_vs_0h	ENSMUSG00000054203	Ifi205
ENSMUSG00000054404	45	9	414	137	3812	5756	1635.3	7.78344	0.606845	11.8621	1.86311e-32	4.14928e-30	6h_vs_0h	ENSMUSG00000054404	Slfn5
ENSMUSG00000054676	642	450	335	425	941	1628	702.34	1.42246	0.21599	3.87732	0.000105614	0.00442121	6h_vs_0h	ENSMUSG00000054676	1600014C10Rik
ENSMUSG00000054728	27	24	12	15	86	188	53.952	2.55732	0.450808	4.37508	1.21385e-05	0.000577635	6h_vs_0h	ENSMUSG00000054728	Phactr1
ENSMUSG00000055447	895	778	710	823	2707	4630	1686.03	2.29781	0.218566	7.83658	4.62979e-15	4.77354e-13	6h_vs_0h	ENSMUSG00000055447	Cd47
ENSMUSG00000055670	2886	2339	1925	2186	4780	10116	3816.04	1.6463	0.228883	4.63688	3.53706e-06	0.000179029	6h_vs_0h	ENSMUSG00000055670	Zzef1
ENSMUSG00000056116	373	283	631	473	3364	5276	1676.86	3.91618	0.273128	12.1964	3.24797e-34	8.09714e-32	6h_vs_0h	ENSMUSG00000056116	H2-T22
ENSMUSG00000056144	13	7	27	28	98	174	56.0215	3.96136	0.501156	6.73714	1.61539e-11	1.26675e-09	6h_vs_0h	ENSMUSG00000056144	Trim34a
ENSMUSG00000056268	631	382	403	330	901	1453	656.092	1.43381	0.263123	3.22592	0.00125568	0.0468818	6h_vs_0h	ENSMUSG00000056268	Dennd1b
ENSMUSG00000057137	114	72	154	149	833	2084	520.598	4.10571	0.312373	11.2708	1.82822e-29	3.67913e-27	6h_vs_0h	ENSMUSG00000057137	Tmem140
ENSMUSG00000057143	385	291	398	378	974	2095	715.797	2.32461	0.25559	6.80627	1.00159e-11	8.00457e-10	6h_vs_0h	ENSMUSG00000057143	Trim12c
ENSMUSG00000057346	7	9	77	79	352	636	186.84	6.11069	0.460245	12.006	3.30534e-33	7.77592e-31	6h_vs_0h	ENSMUSG00000057346	Apol9a
ENSMUSG00000057554	1310	1053	1281	1031	6066	11184	3460.69	3.02822	0.254525	9.59911	8.06354e-22	1.17118e-19	6h_vs_0h	ENSMUSG00000057554	Lgals8
ENSMUSG00000057596	0	0	0	0	54	54	18.0001	8.45796	1.63165	4.82515	1.39895e-06	7.37119e-05	6h_vs_0h	ENSMUSG00000057596	Trim30d
ENSMUSG00000058163	0	1	5	3	194	401	92.2781	9.35797	1.4333	6.1208	9.31057e-10	6.5896e-08	6h_vs_0h	ENSMUSG00000058163	Gm5431
ENSMUSG00000058589	74	52	43	48	222	325	122.545	2.33395	0.319132	5.48033	4.24527e-08	2.66574e-06	6h_vs_0h	ENSMUSG00000058589	Anks1b
ENSMUSG00000060183	0	0	3	0	101	256	53.6256	10.0215	2.36629	3.98791	6.66591e-05	0.00286223	6h_vs_0h	ENSMUSG00000060183	Cxcl11
ENSMUSG00000060519	391	425	1583	1274	11374	18894	5430.66	5.35752	0.301544	15.8269	2.02868e-56	1.30327e-53	6h_vs_0h	ENSMUSG00000060519	Tor3a
ENSMUSG00000060802	5575	2876	3901	3427	12635	16395	7305.54	2.05772	0.283533	5.19418	2.05622e-07	1.19253e-05	6h_vs_0h	ENSMUSG00000060802	B2m
ENSMUSG00000061013	226	112	124	108	432	542	250.059	1.8084	0.332922	3.67475	0.000238081	0.00974672	6h_vs_0h	ENSMUSG00000061013	Mkx
ENSMUSG00000061232	650	554	500	536	4531	6718	2160.91	3.41755	0.223149	12.6936	6.41883e-37	1.72925e-34	6h_vs_0h	ENSMUSG00000061232	H2-K1
ENSMUSG00000061288	420	361	297	338	993	1584	642.205	1.90213	0.230989	5.70215	1.18307e-08	7.66121e-07	6h_vs_0h	ENSMUSG00000061288	Taok3
ENSMUSG00000062007	0	0	0	1	39	69	16.9304	8.35979	1.60736	4.83698	1.31824e-06	6.99004e-05	6h_vs_0h	ENSMUSG00000062007	Hsh2d
ENSMUSG00000062488	11	5	683	289	10112	16868	4417.52	10.9341	0.566491	18.2688	1.46731e-74	2.22804e-71	6h_vs_0h	ENSMUSG00000062488	Ifit3b
ENSMUSG00000063268	124	46	330	229	2299	4624	1193.34	5.56969	0.381848	13.0541	6.01796e-39	1.6753e-36	6h_vs_0h	ENSMUSG00000063268	Parp10
ENSMUSG00000063286	5	3	7	4	281	333	103.503	6.51988	0.642638	9.23519	2.57835e-20	3.50132e-18	6h_vs_0h	ENSMUSG00000063286	Gm8995
ENSMUSG00000063388	0	0	303	87	581	972	324.501	12.2151	1.5486	7.51008	5.90893e-14	5.57609e-12	6h_vs_0h	ENSMUSG00000063388	NA
ENSMUSG00000064128	214	145	139	132	295	802	265.74	1.7285	0.333063	3.43328	0.000596334	0.0232724	6h_vs_0h	ENSMUSG00000064128	Cenpj
ENSMUSG00000066677	0	0	4	2	193	213	68.0734	10.3527	1.51364	6.45308	1.096e-10	8.27196e-09	6h_vs_0h	ENSMUSG00000066677	Ifi208
ENSMUSG00000066755	242	171	120	133	425	1168	342.116	2.05733	0.322667	4.563	5.04287e-06	0.000249944	6h_vs_0h	ENSMUSG00000066755	Tnfsf18
ENSMUSG00000066800	95	43	84	59	595	937	288.59	3.7171	0.355597	8.808	1.27396e-18	1.55321e-16	6h_vs_0h	ENSMUSG00000066800	Rnasel
ENSMUSG00000066861	0	0	5	0	292	455	118.721	11.1721	2.8478	3.71765	0.000201082	0.00827259	6h_vs_0h	ENSMUSG00000066861	Oas1g
ENSMUSG00000067212	95	72	184	103	988	1232	442.196	3.97196	0.384599	8.80648	1.29137e-18	1.56302e-16	6h_vs_0h	ENSMUSG00000067212	H2-T23
ENSMUSG00000067297	12	8	10	8	31	89	23.9743	2.69992	0.659155	3.20853	0.00133416	0.0494111	6h_vs_0h	ENSMUSG00000067297	Ifit1bl2
ENSMUSG00000068245	45	22	263	155	3467	5755	1536.19	7.32733	0.387836	17.3845	1.0817e-67	1.12923e-64	6h_vs_0h	ENSMUSG00000068245	Phf11d
ENSMUSG00000068246	1	2	21	32	215	493	117.442	8.01147	0.908057	8.17841	2.87604e-16	3.09925e-14	6h_vs_0h	ENSMUSG00000068246	Apol9b
ENSMUSG00000068417	36	42	51	51	219	516	141.938	3.32844	0.392801	6.98431	2.86258e-12	2.37879e-10	6h_vs_0h	ENSMUSG00000068417	Pnp2
ENSMUSG00000068606	0	0	199	55	1113	1856	517.093	13.1506	1.54542	8.13087	4.2623e-16	4.5346e-14	6h_vs_0h	ENSMUSG00000068606	Gm4841
ENSMUSG00000068735	117	55	78	63	314	319	156.954	2.20226	0.40779	3.96592	7.3113e-05	0.0031313	6h_vs_0h	ENSMUSG00000068735	Trp53i11
ENSMUSG00000069793	297	82	888	314	3812	4675	1678.39	4.83464	0.561552	7.56767	3.79979e-14	3.62673e-12	6h_vs_0h	ENSMUSG00000069793	Slfn9
ENSMUSG00000069874	63	28	2222	1118	4453	7766	2603.71	7.29639	0.429276	15.6342	4.25703e-55	2.29372e-52	6h_vs_0h	ENSMUSG00000069874	Irgm2
ENSMUSG00000069892	30	22	28	39	218	397	115.64	3.74036	0.367586	8.58402	9.16176e-18	1.05537e-15	6h_vs_0h	ENSMUSG00000069892	9930111J21Rik2
ENSMUSG00000069893	8	19	13	11	66	150	41.4475	3.04643	0.630136	3.90619	9.3764e-05	0.00397497	6h_vs_0h	ENSMUSG00000069893	9930111J21Rik1
ENSMUSG00000070031	3	6	8	4	131	287	66.9363	5.64758	0.654461	7.73549	1.03003e-14	1.03642e-12	6h_vs_0h	ENSMUSG00000070031	Sp140
ENSMUSG00000070034	2	5	11	6	229	362	97.4885	6.57298	0.665373	8.99943	2.26891e-19	2.87103e-17	6h_vs_0h	ENSMUSG00000070034	Sp110
ENSMUSG00000070327	1667	1170	7079	4202	47622	91290	24038.1	5.78317	0.331389	15.686	1.88571e-55	1.0499e-52	6h_vs_0h	ENSMUSG00000070327	Rnf213
ENSMUSG00000070427	41	27	28	32	178	208	84.5014	2.7646	0.401628	5.42691	5.73376e-08	3.54707e-06	6h_vs_0h	ENSMUSG00000070427	Il18bp
ENSMUSG00000070501	1	2	1	1	81	217	44.7985	6.73061	0.97491	6.30378	2.90474e-10	2.10948e-08	6h_vs_0h	ENSMUSG00000070501	Ifi214
ENSMUSG00000070730	918	693	504	673	1274	2954	1093.47	1.5206	0.264655	3.53516	0.000407527	0.016207	6h_vs_0h	ENSMUSG00000070730	Rmdn3
ENSMUSG00000071350	268	136	309	198	1654	2341	795.375	3.56549	0.347062	8.58778	8.86646e-18	1.02845e-15	6h_vs_0h	ENSMUSG00000071350	Setdb2
ENSMUSG00000072244	12	6	32	26	48	66	32.5407	2.90604	0.59614	3.89345	9.88279e-05	0.00416849	6h_vs_0h	ENSMUSG00000072244	Trim6
ENSMUSG00000072620	14	13	63	57	506	1002	258.805	5.95593	0.396709	13.5387	9.23995e-42	2.96798e-39	6h_vs_0h	ENSMUSG00000072620	Slfn2
ENSMUSG00000072621	7	4	28	9	122	258	66.8598	5.27375	0.688547	6.80963	9.78511e-12	7.85773e-10	6h_vs_0h	ENSMUSG00000072621	Slfn10-ps
ENSMUSG00000073144	7	4	17	17	58	85	31.1136	3.92345	0.647279	5.15767	2.5004e-07	1.44014e-05	6h_vs_0h	ENSMUSG00000073144	4930599N23Rik
ENSMUSG00000073411	831	772	776	894	5517	8196	2736.34	3.2794	0.237676	11.3364	8.66211e-30	1.78621e-27	6h_vs_0h	ENSMUSG00000073411	H2-D1
ENSMUSG00000073489	386	275	945	768	8854	14207	4060.33	5.32454	0.248551	19.0687	4.59571e-81	8.52913e-78	6h_vs_0h	ENSMUSG00000073489	Ifi204
ENSMUSG00000073490	3	0	47	21	215	329	100.404	7.73831	0.964754	7.41465	1.21943e-13	1.13789e-11	6h_vs_0h	ENSMUSG00000073490	Ifi207
ENSMUSG00000073491	0	0	2	0	15	27	6.92656	6.99435	1.83956	3.48417	0.000493673	0.0193564	6h_vs_0h	ENSMUSG00000073491	Ifi213
ENSMUSG00000073555	1	0	49	20	638	723	237.796	10.6677	1.45833	6.91383	4.71743e-12	3.86251e-10	6h_vs_0h	ENSMUSG00000073555	Gm4951
ENSMUSG00000074151	12	7	83	39	4010	6062	1620.3	9.27023	0.498723	17.4149	6.35742e-68	7.0792e-65	6h_vs_0h	ENSMUSG00000074151	Nlrc5
ENSMUSG00000074896	29	9	1607	723	29526	51603	13083.4	11.3023	0.505494	21.2016	9.23331e-100	5.1408e-96	6h_vs_0h	ENSMUSG00000074896	Ifit3
ENSMUSG00000075010	0	0	2	1	22	27	8.58034	7.2808	1.72415	3.88354	0.000102947	0.00432041	6h_vs_0h	ENSMUSG00000075010	AW112010
ENSMUSG00000075602	1461	778	1167	942	5483	4747	2467.66	2.53899	0.373894	5.22606	1.73164e-07	1.02931e-05	6h_vs_0h	ENSMUSG00000075602	Ly6a
ENSMUSG00000078153	3	3	4	6	44	57	19.1484	4.29394	0.843725	4.39591	1.1031e-05	0.000527941	6h_vs_0h	ENSMUSG00000078153	Psme2b
ENSMUSG00000078349	39	21	167	143	512	697	265.288	4.57968	0.350456	11.3985	4.25396e-30	8.88174e-28	6h_vs_0h	ENSMUSG00000078349	NA
ENSMUSG00000078606	9	4	13	11	203	414	100.587	5.74245	0.536682	9.60987	7.26389e-22	1.07371e-19	6h_vs_0h	ENSMUSG00000078606	Gm4070
ENSMUSG00000078616	0	1	0	0	106	251	53.5637	8.59637	1.4621	5.47935	4.26898e-08	2.67059e-06	6h_vs_0h	ENSMUSG00000078616	NA
ENSMUSG00000078853	54	20	1697	758	8049	11906	3685.21	8.34736	0.477398	16.2597	1.90644e-59	1.38449e-56	6h_vs_0h	ENSMUSG00000078853	Igtp
ENSMUSG00000078920	30	35	259	123	4095	5080	1576.55	7.34374	0.458108	14.7536	2.91688e-49	1.13304e-46	6h_vs_0h	ENSMUSG00000078920	Ifi47
ENSMUSG00000078921	4	0	45	22	1170	1927	498.728	9.8151	0.814793	11.3282	9.5188e-30	1.93893e-27	6h_vs_0h	ENSMUSG00000078921	Tgtp2
ENSMUSG00000078922	5	1	47	15	974	1682	426.654	9.00563	0.754772	11.1565	6.65459e-29	1.32323e-26	6h_vs_0h	ENSMUSG00000078922	Tgtp1
ENSMUSG00000078954	17	13	9	16	121	227	62.6858	3.70521	0.466856	6.68347	2.33352e-11	1.80448e-09	6h_vs_0h	ENSMUSG00000078954	Arhgap8
ENSMUSG00000079017	68	25	33	26	356	251	129.761	3.11515	0.530706	4.76753	1.86501e-06	9.67428e-05	6h_vs_0h	ENSMUSG00000079017	Ifi27l2a
ENSMUSG00000079018	180	87	119	85	630	569	279.764	2.51208	0.418934	4.59997	4.22546e-06	0.000211311	6h_vs_0h	ENSMUSG00000079018	Ly6c1
ENSMUSG00000079197	264	222	302	257	786	1604	545.892	2.43738	0.276892	6.68988	2.23352e-11	1.73519e-09	6h_vs_0h	ENSMUSG00000079197	Psme2
ENSMUSG00000079339	16	10	538	179	5225	9013	2367.67	9.2932	0.562796	15.4731	5.26972e-54	2.66728e-51	6h_vs_0h	ENSMUSG00000079339	Ifit1bl1
ENSMUSG00000079363	0	1	24	3	697	887	261.926	10.817	1.85904	5.50392	3.71437e-08	2.34118e-06	6h_vs_0h	ENSMUSG00000079363	Gbp4
ENSMUSG00000079491	17	15	20	16	211	319	95.637	4.24752	0.425122	8.61522	6.98091e-18	8.21141e-16	6h_vs_0h	ENSMUSG00000079491	H2-T10
ENSMUSG00000079505	1	2	6	5	38	67	18.9828	5.28817	1.02964	4.56779	4.92898e-06	0.000245026	6h_vs_0h	ENSMUSG00000079505	NA
ENSMUSG00000079659	23	22	8	16	94	107	44.0638	2.39097	0.520563	3.46926	0.000521889	0.0204148	6h_vs_0h	ENSMUSG00000079659	Tmem243
ENSMUSG00000080717	121	81	97	90	236	379	162.189	1.81118	0.291985	4.19947	2.67541e-05	0.00121433	6h_vs_0h	ENSMUSG00000080717	B230307C23Rik
ENSMUSG00000082292	2	1	119	32	1837	2439	719.571	10.7191	0.994917	10.1858	2.29361e-24	3.61416e-22	6h_vs_0h	ENSMUSG00000082292	NA
ENSMUSG00000082361	24	20	15	29	345	539	154.083	4.52302	0.387063	10.1741	2.58733e-24	4.0389e-22	6h_vs_0h	ENSMUSG00000082361	Btc
ENSMUSG00000084846	6	2	6	2	61	85	26.0325	4.44525	0.78593	4.9117	9.02915e-07	4.84932e-05	6h_vs_0h	ENSMUSG00000084846	NA
ENSMUSG00000085007	3	2	5	3	31	39	13.6656	4.04914	0.956559	3.62146	0.000292945	0.011819	6h_vs_0h	ENSMUSG00000085007	Gm11549
ENSMUSG00000086184	3	2	6	4	56	128	30.3812	5.34563	0.83572	5.69644	1.22333e-08	7.88933e-07	6h_vs_0h	ENSMUSG00000086184	NA
ENSMUSG00000086513	2	1	3	5	50	57	19.5469	5.42176	1.04652	4.62174	3.80526e-06	0.000192022	6h_vs_0h	ENSMUSG00000086513	NA
ENSMUSG00000089809	40	7	97	39	195	156	94.398	3.33924	0.70897	3.88485	0.000102392	0.00430793	6h_vs_0h	ENSMUSG00000089809	A930011G23Rik
ENSMUSG00000090125	6	7	7	7	83	127	37.8587	4.19773	0.608268	5.93937	2.86125e-09	1.95067e-07	6h_vs_0h	ENSMUSG00000090125	Pou3f1
ENSMUSG00000090215	14	12	66	48	137	327	96.4289	4.2806	0.481702	7.67196	1.69389e-14	1.67414e-12	6h_vs_0h	ENSMUSG00000090215	Trim34b
ENSMUSG00000090222	4	6	61	39	462	570	189.58	6.91335	0.591132	10.7055	9.59207e-27	1.68649e-24	6h_vs_0h	ENSMUSG00000090222	NA
ENSMUSG00000090272	32	10	183	97	2056	3380	913.833	7.26689	0.463657	14.4113	4.39428e-47	1.63106e-44	6h_vs_0h	ENSMUSG00000090272	Mndal
ENSMUSG00000090523	1110	501	747	534	2522	2543	1319.26	1.9905	0.383064	3.6691	0.000243405	0.00994033	6h_vs_0h	ENSMUSG00000090523	Gypc
ENSMUSG00000090881	0	0	1	0	14	29	6.75128	7.00547	1.81785	3.5319	0.000412582	0.0163302	6h_vs_0h	ENSMUSG00000090881	Phf11-ps
ENSMUSG00000090942	0	1	115	15	826	733	291.609	10.8544	1.92022	5.34804	8.89138e-08	5.36147e-06	6h_vs_0h	ENSMUSG00000090942	F830016B08Rik
ENSMUSG00000091144	15	11	35	21	166	201	74.8491	4.06571	0.509387	6.83314	8.30763e-12	6.70349e-10	6h_vs_0h	ENSMUSG00000091144	Phf11c
ENSMUSG00000091549	90	72	129	124	544	867	295.634	3.31354	0.27213	10.0266	1.16479e-23	1.80144e-21	6h_vs_0h	ENSMUSG00000091549	NA
ENSMUSG00000091649	0	1	1	1	708	1029	276.567	10.9664	1.41412	7.34124	2.11629e-13	1.91072e-11	6h_vs_0h	ENSMUSG00000091649	Phf11b
ENSMUSG00000092021	0	0	18	5	71	123	34.9914	9.20816	1.58102	5.45417	4.92028e-08	3.05515e-06	6h_vs_0h	ENSMUSG00000092021	Gbp11
ENSMUSG00000092564	26	15	25	28	106	216	65.3263	3.14789	0.432067	5.93169	2.9984e-09	2.01944e-07	6h_vs_0h	ENSMUSG00000092564	BC051226
ENSMUSG00000093661	116	152	103	134	558	1035	331.999	2.6799	0.349979	5.98577	2.15363e-09	1.49262e-07	6h_vs_0h	ENSMUSG00000093661	Eif4e3
ENSMUSG00000096727	12	3	142	83	972	1393	424.965	7.55731	0.535244	13.0264	8.65792e-39	2.37071e-36	6h_vs_0h	ENSMUSG00000096727	Psmb9
ENSMUSG00000096954	37	21	184	78	227	362	154.975	3.56515	0.501351	5.94424	2.77749e-09	1.90915e-07	6h_vs_0h	ENSMUSG00000096954	NA
ENSMUSG00000097000	133	74	91	65	298	442	177.122	2.07583	0.342466	4.35323	1.34146e-05	0.000631165	6h_vs_0h	ENSMUSG00000097000	NA
ENSMUSG00000097006	74	45	58	41	587	923	273.978	3.88223	0.321642	10.2512	1.16848e-24	1.85877e-22	6h_vs_0h	ENSMUSG00000097006	9530082P21Rik
ENSMUSG00000097194	0	1	29	21	87	61	36.2253	7.52654	1.51257	4.58922	4.44897e-06	0.000221824	6h_vs_0h	ENSMUSG00000097194	NA
ENSMUSG00000097572	13	11	25	15	94	139	48.5487	3.4813	0.53384	5.42541	5.78203e-08	3.56374e-06	6h_vs_0h	ENSMUSG00000097572	NA
ENSMUSG00000100706	7	4	6	4	47	88	24.3147	3.80271	0.698572	4.60613	4.10229e-06	0.000205767	6h_vs_0h	ENSMUSG00000100706	NA
ENSMUSG00000102964	21	7	82	21	71	123	55.482	3.04156	0.727361	3.37736	0.000731861	0.0283626	6h_vs_0h	ENSMUSG00000102964	NA
ENSMUSG00000104654	1	0	2	0	41	53	15.71	6.79064	1.5733	3.94435	8.00168e-05	0.00341821	6h_vs_0h	ENSMUSG00000104654	NA
ENSMUSG00000104713	2	0	28	10	307	424	125.11	8.75976	1.12969	7.23629	4.61112e-13	3.99065e-11	6h_vs_0h	ENSMUSG00000104713	Gbp6
ENSMUSG00000105096	0	0	0	0	22	25	7.70713	7.23527	1.8238	3.64638	0.000265961	0.0107824	6h_vs_0h	ENSMUSG00000105096	Gbp10
ENSMUSG00000105504	0	1	106	53	1122	1912	505.666	11.7406	1.43488	7.77455	7.57145e-15	7.71133e-13	6h_vs_0h	ENSMUSG00000105504	Gbp5
ENSMUSG00000106734	62	25	337	151	936	1496	494.901	5.05803	0.472461	9.46752	2.86558e-21	4.05626e-19	6h_vs_0h	ENSMUSG00000106734	NA
ENSMUSG00000107017	5	2	45	17	65	74	36.6821	4.59478	0.834902	4.8027	1.56542e-06	8.19661e-05	6h_vs_0h	ENSMUSG00000107017	NA
ENSMUSG00000107215	20	6	182	91	396	602	217.774	5.52274	0.530522	9.30732	1.31092e-20	1.79478e-18	6h_vs_0h	ENSMUSG00000107215	NA
ENSMUSG00000108068	8	1	49	33	84	157	55.1193	4.96495	0.684027	6.40318	1.52175e-10	1.13472e-08	6h_vs_0h	ENSMUSG00000108068	NA
ENSMUSG00000108732	35	14	28	15	307	453	135.842	4.21158	0.44643	8.12353	4.52819e-16	4.78699e-14	6h_vs_0h	ENSMUSG00000108732	NA
ENSMUSG00000108801	13	21	13	20	93	224	58.9492	3.28893	0.535612	5.0483	4.45765e-07	2.49853e-05	6h_vs_0h	ENSMUSG00000108801	NA
ENSMUSG00000109729	0	0	17	9	14	40	13.3066	7.28847	1.65841	4.04211	5.2972e-05	0.00231016	6h_vs_0h	ENSMUSG00000109729	NA
ENSMUSG00000110206	41	16	31	19	99	144	56.3713	2.35836	0.504677	3.51385	0.00044166	0.0173987	6h_vs_0h	ENSMUSG00000110206	Flt3l
ENSMUSG00000111118	0	3	0	0	27	61	13.7296	4.91071	1.21351	3.56461	0.000364393	0.0145609	6h_vs_0h	ENSMUSG00000111118	NA
ENSMUSG00000112627	117	72	72	71	291	395	164.664	2.10165	0.308055	4.92331	8.50903e-07	4.61449e-05	6h_vs_0h	ENSMUSG00000112627	4933412E12Rik
ENSMUSG00000115338	420	381	482	425	2259	4751	1361.01	3.25353	0.273373	9.7615	1.64702e-22	2.52387e-20	6h_vs_0h	ENSMUSG00000115338	Pnp
ENSMUSG00000116033	3	1	1	3	31	45	13.3858	4.49035	1.03106	3.78771	0.00015204	0.00631723	6h_vs_0h	ENSMUSG00000116033	NA
ENSMUSG00000116617	6	4	4	3	49	55	19.8799	3.64064	0.761887	4.01062	6.05594e-05	0.00262053	6h_vs_0h	ENSMUSG00000116617	NA
ENSMUSG00000116639	0	1	69	28	66	78	43.9368	7.3995	1.50922	4.51525	6.3242e-06	0.000310768	6h_vs_0h	ENSMUSG00000116639	NA
ENSMUSG00000116946	3	2	5	6	47	95	24.5604	4.99194	0.844959	5.21557	1.83252e-07	1.08541e-05	6h_vs_0h	ENSMUSG00000116946	NA
ENSMUSG00000000386	0	1	549	152	8632	14397	3743.48	4.60639	0.54821	7.33549	2.20914e-13	3.70951e-11	6h_vs_1h	ENSMUSG00000000386	Mx1
ENSMUSG00000000708	809	415	565	403	1977	2787	1122.12	1.92997	0.319243	4.213	2.52003e-05	0.00159933	6h_vs_1h	ENSMUSG00000000708	Kat2b
ENSMUSG00000001123	254	105	310	172	1768	1796	739.745	2.56827	0.439656	4.51097	6.4532e-06	0.000448386	6h_vs_1h	ENSMUSG00000001123	Lgals9
ENSMUSG00000001166	13	8	27	23	179	359	95.1807	3.00803	0.400178	6.05489	1.40512e-09	1.52017e-07	6h_vs_1h	ENSMUSG00000001166	Oas1c
ENSMUSG00000001750	899	654	1228	999	5104	7889	2718.14	2.16356	0.246224	6.41107	1.44503e-10	1.77816e-08	6h_vs_1h	ENSMUSG00000001750	Tcirg1
ENSMUSG00000001768	1388	777	977	778	2899	4264	1786.83	1.65628	0.276308	3.87712	0.0001057	0.00599959	6h_vs_1h	ENSMUSG00000001768	Rin2
ENSMUSG00000002227	300	127	325	190	2017	2247	863.604	2.71658	0.413366	5.15663	2.51437e-07	2.11102e-05	6h_vs_1h	ENSMUSG00000002227	Mov10
ENSMUSG00000002307	691	510	1245	1134	4367	9253	2715.94	2.08435	0.243504	6.1574	7.39469e-10	8.39454e-08	6h_vs_1h	ENSMUSG00000002307	Daxx
ENSMUSG00000002847	29	25	26	28	107	214	67.4966	2.15904	0.409598	3.84289	0.000121593	0.00677926	6h_vs_1h	ENSMUSG00000002847	Pla1a
ENSMUSG00000003282	692	415	459	323	1354	1782	814.925	1.64664	0.313865	3.38246	0.000718394	0.0347763	6h_vs_1h	ENSMUSG00000003282	Plag1
ENSMUSG00000006418	782	597	822	761	2225	3873	1460.36	1.54843	0.220021	4.37882	1.19322e-05	0.000794822	6h_vs_1h	ENSMUSG00000006418	Rnf114
ENSMUSG00000006930	16	3	90	60	1815	2922	776.256	4.58819	0.361453	11.0753	1.65331e-28	1.48063e-25	6h_vs_1h	ENSMUSG00000006930	Hap1
ENSMUSG00000009207	1072	691	633	595	1575	3381	1239.95	1.5795	0.249514	3.98575	6.72667e-05	0.00398654	6h_vs_1h	ENSMUSG00000009207	Lnpk
ENSMUSG00000009585	318	240	351	279	901	1653	600.075	1.60756	0.268081	3.81439	0.000136521	0.00751096	6h_vs_1h	ENSMUSG00000009585	Apobec3
ENSMUSG00000010358	378	264	725	626	4138	7796	2199.6	2.72884	0.237779	9.01612	1.94861e-19	7.85288e-17	6h_vs_1h	ENSMUSG00000010358	Ifi35
ENSMUSG00000010601	7	7	13	6	78	153	41.2729	3.17675	0.591512	4.38157	1.17826e-05	0.000788117	6h_vs_1h	ENSMUSG00000010601	Apol7a
ENSMUSG00000012519	144	167	194	193	2563	4671	1240.27	3.82195	0.295691	10.9471	6.86286e-28	5.38831e-25	6h_vs_1h	ENSMUSG00000012519	Mlkl
ENSMUSG00000014030	0	1	2	0	46	84	20.6638	5.61055	1.20931	4.15572	3.24259e-05	0.00203429	6h_vs_1h	ENSMUSG00000014030	Pax5
ENSMUSG00000014773	11	8	23	19	242	495	123.409	3.70996	0.398127	7.84915	4.18876e-15	8.76919e-13	6h_vs_1h	ENSMUSG00000014773	Dll1
ENSMUSG00000015377	81	57	64	40	178	375	124.219	1.97131	0.390365	3.55132	0.000383301	0.0190704	6h_vs_1h	ENSMUSG00000015377	Dennd6b
ENSMUSG00000016206	66	46	54	61	327	789	205.229	2.83446	0.333854	6.73785	1.60742e-11	2.15931e-09	6h_vs_1h	ENSMUSG00000016206	H2-M3
ENSMUSG00000016496	16	14	346	163	1059	3619	782.157	2.6656	0.479184	4.34196	1.41216e-05	0.000925368	6h_vs_1h	ENSMUSG00000016496	Cd274
ENSMUSG00000017057	1426	956	1193	1001	2954	5028	2016.92	1.46591	0.237878	3.70322	0.00021288	0.0111507	6h_vs_1h	ENSMUSG00000017057	Il13ra1
ENSMUSG00000017830	17	19	128	85	1126	1901	520.984	3.42684	0.335456	8.47155	2.42147e-17	7.80682e-15	6h_vs_1h	ENSMUSG00000017830	Dhx58
ENSMUSG00000019082	352	281	359	391	1491	2207	826.264	1.93987	0.224032	6.04768	1.46945e-09	1.57917e-07	6h_vs_1h	ENSMUSG00000019082	Slc25a22
ENSMUSG00000019699	1224	833	651	725	2635	3999	1608.24	1.90395	0.202292	6.52006	7.02806e-11	8.85096e-09	6h_vs_1h	ENSMUSG00000019699	Akt3
ENSMUSG00000019866	147	85	132	102	1290	2023	600.587	3.44024	0.28745	9.93298	2.99169e-23	1.72236e-20	6h_vs_1h	ENSMUSG00000019866	Crybg1
ENSMUSG00000020128	1280	995	739	823	1841	3863	1496.59	1.44571	0.229144	3.75619	0.000172522	0.00927021	6h_vs_1h	ENSMUSG00000020128	Vps54
ENSMUSG00000020357	188	191	126	201	573	960	358.47	1.85843	0.314651	4.04713	5.185e-05	0.00317803	6h_vs_1h	ENSMUSG00000020357	Flt4
ENSMUSG00000020415	401	343	210	271	603	1099	463.519	1.43053	0.250545	3.37476	0.000738799	0.0355505	6h_vs_1h	ENSMUSG00000020415	Pttg1
ENSMUSG00000020464	981	803	1229	1092	4727	9025	2833.19	2.1512	0.238564	6.56509	5.20024e-11	6.653e-09	6h_vs_1h	ENSMUSG00000020464	Pnpt1
ENSMUSG00000020572	849	540	993	656	4434	7791	2424.74	2.47784	0.303263	6.24158	4.33169e-10	5.02352e-08	6h_vs_1h	ENSMUSG00000020572	Nampt
ENSMUSG00000020638	6	3	457	226	11002	28834	6032.36	5.37405	0.426432	11.2305	2.88774e-29	3.10336e-26	6h_vs_1h	ENSMUSG00000020638	Cmpk2
ENSMUSG00000020641	3	2	640	307	20229	41074	9537.99	5.56667	0.409194	12.1743	4.2586e-34	1.14414e-30	6h_vs_1h	ENSMUSG00000020641	Rsad2
ENSMUSG00000020707	112	123	93	122	373	1177	301.368	2.36727	0.40284	4.42427	9.67711e-06	0.000655441	6h_vs_1h	ENSMUSG00000020707	Rnf135
ENSMUSG00000020790	2579	1674	1845	1777	5188	8688	3482.05	1.54877	0.206789	4.66066	3.15196e-06	0.000230953	6h_vs_1h	ENSMUSG00000020790	Ankfy1
ENSMUSG00000020805	2	4	2	2	44	62	18.6174	4.37242	0.965575	3.92245	8.76525e-05	0.00506437	6h_vs_1h	ENSMUSG00000020805	Slc13a5
ENSMUSG00000020961	35	39	22	28	209	546	132.293	3.46258	0.431048	6.67579	2.4591e-11	3.22283e-09	6h_vs_1h	ENSMUSG00000020961	Ston2
ENSMUSG00000021036	2856	1963	2204	1960	5869	10094	3991.94	1.54169	0.219653	4.35546	1.32791e-05	0.000880898	6h_vs_1h	ENSMUSG00000021036	Sptlc2
ENSMUSG00000021583	598	348	342	324	1823	2643	973.058	2.38227	0.248005	7.24691	4.26397e-13	7.0138e-11	6h_vs_1h	ENSMUSG00000021583	Erap1
ENSMUSG00000021809	132	70	82	78	278	609	193.541	2.03742	0.329228	4.41161	1.02605e-05	0.000692046	6h_vs_1h	ENSMUSG00000021809	Nudt13
ENSMUSG00000022014	1	2	7	12	580	900	237.47	5.91878	0.445237	11.9796	4.54275e-33	9.15364e-30	6h_vs_1h	ENSMUSG00000022014	Epsti1
ENSMUSG00000022197	107	73	84	64	642	909	302.211	3.02476	0.308168	7.91701	2.43295e-15	5.37248e-13	6h_vs_1h	ENSMUSG00000022197	Pdzd2
ENSMUSG00000022216	496	411	430	492	1652	3263	1064.4	2.00305	0.230366	6.15564	7.4774e-10	8.42907e-08	6h_vs_1h	ENSMUSG00000022216	Psme1
ENSMUSG00000022309	296	228	157	151	648	1103	407.695	2.11645	0.244573	6.26174	3.80705e-10	4.44707e-08	6h_vs_1h	ENSMUSG00000022309	Angpt1
ENSMUSG00000022548	115	26	134	34	2293	1587	729.531	4.25471	1.06515	3.44527	0.000570487	0.0278674	6h_vs_1h	ENSMUSG00000022548	Apod
ENSMUSG00000022575	360	322	236	322	1161	1868	682.998	2.07181	0.253959	5.85452	4.78392e-09	4.85012e-07	6h_vs_1h	ENSMUSG00000022575	Gsdmd
ENSMUSG00000022587	604	285	573	414	4058	3890	1652.47	2.71151	0.383252	5.54858	2.88002e-08	2.66815e-06	6h_vs_1h	ENSMUSG00000022587	Ly6e
ENSMUSG00000022867	1640	1142	1187	1136	5205	9568	3132.72	2.26303	0.209961	7.99209	1.32675e-15	3.19212e-13	6h_vs_1h	ENSMUSG00000022867	Usp25
ENSMUSG00000022906	421	223	1117	828	6670	13214	3524.91	2.92433	0.299499	7.81079	5.68317e-15	1.15965e-12	6h_vs_1h	ENSMUSG00000022906	Parp9
ENSMUSG00000023186	2569	1383	1703	1231	5230	7894	3207.08	1.77981	0.29946	3.98989	6.61029e-05	0.00396126	6h_vs_1h	ENSMUSG00000023186	Vwa5a
ENSMUSG00000023206	141	119	105	135	425	1002	298.239	2.13545	0.307651	5.03963	4.66429e-07	3.81667e-05	6h_vs_1h	ENSMUSG00000023206	Il15ra
ENSMUSG00000023307	1445	1098	1049	1147	2877	5201	2045.03	1.48157	0.198063	4.5267	5.99118e-06	0.000419904	6h_vs_1h	ENSMUSG00000023307	March5
ENSMUSG00000023961	509	281	361	330	2709	4244	1341.32	2.95244	0.251494	9.41351	4.7983e-21	2.3439e-18	6h_vs_1h	ENSMUSG00000023961	Enpp4
ENSMUSG00000024066	72	49	61	42	2213	2613	825.218	5.21713	0.340809	13.5916	4.49224e-42	1.81037e-38	6h_vs_1h	ENSMUSG00000024066	Xdh
ENSMUSG00000024079	1169	581	2144	1485	8516	14147	4520.78	2.24201	0.317529	5.21844	1.80433e-07	1.53083e-05	6h_vs_1h	ENSMUSG00000024079	Eif2ak2
ENSMUSG00000024112	152	87	98	57	585	676	270.511	2.6861	0.395824	5.30816	1.1074e-07	9.70178e-06	6h_vs_1h	ENSMUSG00000024112	Cacna1h
ENSMUSG00000024302	194	108	113	114	458	555	251.495	1.82831	0.314785	3.94973	7.82392e-05	0.00458624	6h_vs_1h	ENSMUSG00000024302	Dtna
ENSMUSG00000024308	1064	455	871	698	5607	8397	2737.98	2.78209	0.32375	6.78639	1.14976e-11	1.57068e-09	6h_vs_1h	ENSMUSG00000024308	Tapbp
ENSMUSG00000024338	96	47	346	164	3406	5619	1536.22	3.73316	0.407158	7.73204	1.0584e-14	2.05559e-12	6h_vs_1h	ENSMUSG00000024338	Psmb8
ENSMUSG00000024339	395	336	417	415	3305	5588	1657.37	3.02896	0.223294	10.945	7.0195e-28	5.38831e-25	6h_vs_1h	ENSMUSG00000024339	Tap2
ENSMUSG00000024678	35	8	25	22	312	351	123.891	3.49961	0.503981	5.78318	7.33032e-09	7.1615e-07	6h_vs_1h	ENSMUSG00000024678	Ms4a4d
ENSMUSG00000024805	302	208	231	193	1178	2202	676.717	2.5822	0.257402	7.75907	8.55578e-15	1.70271e-12	6h_vs_1h	ENSMUSG00000024805	Pcgf5
ENSMUSG00000024887	271	155	160	136	511	741	316.828	1.71337	0.290642	3.88232	0.000103463	0.00589337	6h_vs_1h	ENSMUSG00000024887	Asah2
ENSMUSG00000025036	206	181	162	202	652	1169	409.416	1.93155	0.255186	5.27673	1.31513e-07	1.13978e-05	6h_vs_1h	ENSMUSG00000025036	Sfxn2
ENSMUSG00000025076	257	162	145	169	518	925	343.85	1.80758	0.246525	4.95927	7.07596e-07	5.64675e-05	6h_vs_1h	ENSMUSG00000025076	Casp7
ENSMUSG00000025089	951	803	588	744	3407	4748	1815.97	2.26927	0.237125	7.10285	1.22208e-12	1.89423e-10	6h_vs_1h	ENSMUSG00000025089	Gfra1
ENSMUSG00000025165	1	0	0	0	54	64	19.3627	7.99922	1.59948	4.6354	3.56255e-06	0.000259856	6h_vs_1h	ENSMUSG00000025165	Sectm1a
ENSMUSG00000025324	2142	1294	1217	1116	4599	6406	2698.49	1.88063	0.242843	5.33527	9.54019e-08	8.49657e-06	6h_vs_1h	ENSMUSG00000025324	Atp10a
ENSMUSG00000025498	29	14	969	620	9648	11628	3796.82	3.39858	0.353112	7.96795	1.61329e-15	3.71518e-13	6h_vs_1h	ENSMUSG00000025498	Irf7
ENSMUSG00000025790	1157	674	768	679	3134	2976	1567.35	1.78944	0.336792	3.57622	0.000348603	0.0175062	6h_vs_1h	ENSMUSG00000025790	Slco3a1
ENSMUSG00000025887	674	270	630	331	1986	2999	1110.96	1.98173	0.418809	3.33501	0.000852967	0.0403221	6h_vs_1h	ENSMUSG00000025887	Casp12
ENSMUSG00000026088	268	219	353	334	1016	2291	705.301	1.82608	0.271399	4.57289	4.81047e-06	0.000343541	6h_vs_1h	ENSMUSG00000026088	Mitd1
ENSMUSG00000026102	804	557	571	511	2151	3695	1316.43	2.03774	0.225808	6.43351	1.24689e-10	1.55813e-08	6h_vs_1h	ENSMUSG00000026102	Inpp1
ENSMUSG00000026104	291	136	946	609	5937	9044	2743.81	2.88072	0.344033	6.67297	2.50684e-11	3.25889e-09	6h_vs_1h	ENSMUSG00000026104	Stat1
ENSMUSG00000026222	10	4	43	15	838	1171	334.813	4.73212	0.479688	8.64545	5.35943e-18	1.83817e-15	6h_vs_1h	ENSMUSG00000026222	Sp100
ENSMUSG00000026433	265	166	185	170	517	841	343.589	1.55091	0.257233	3.755	0.000173342	0.00928331	6h_vs_1h	ENSMUSG00000026433	Rab29
ENSMUSG00000026466	710	443	735	535	3456	5196	1786.13	2.38811	0.283394	6.36256	1.98423e-10	2.40494e-08	6h_vs_1h	ENSMUSG00000026466	Tor1aip1
ENSMUSG00000026535	674	546	2100	1491	15418	24497	7179.16	3.08293	0.283855	8.80001	1.36801e-18	5.12843e-16	6h_vs_1h	ENSMUSG00000026535	Ifi202b
ENSMUSG00000026536	52	34	129	87	1210	1634	512.407	3.35773	0.327744	8.46004	2.67275e-17	8.44798e-15	6h_vs_1h	ENSMUSG00000026536	Ifi211
ENSMUSG00000026797	499	295	387	302	1546	1849	801.506	1.96531	0.309544	4.45919	8.22706e-06	0.00056195	6h_vs_1h	ENSMUSG00000026797	Stxbp1
ENSMUSG00000026896	120	70	808	503	9976	19939	4863.34	4.07456	0.330937	10.5445	5.38616e-26	3.77499e-23	6h_vs_1h	ENSMUSG00000026896	Ifih1
ENSMUSG00000026946	59	22	43	34	602	1164	297.018	4.10163	0.3743	9.39522	5.70961e-21	2.70703e-18	6h_vs_1h	ENSMUSG00000026946	Nmi
ENSMUSG00000026971	0	3	0	1	32	87	18.2052	6.43646	1.62657	3.59742	0.000321391	0.0161901	6h_vs_1h	ENSMUSG00000026971	Itgb6
ENSMUSG00000027009	272	175	197	178	556	859	360.4	1.5395	0.258161	3.69729	0.000217912	0.0113681	6h_vs_1h	ENSMUSG00000027009	Itga4
ENSMUSG00000027068	220	217	162	179	504	972	357.103	1.70601	0.283107	3.95969	7.50468e-05	0.00441516	6h_vs_1h	ENSMUSG00000027068	Dhrs9
ENSMUSG00000027078	90	56	174	102	1912	2268	758.586	3.57774	0.368174	8.12862	4.34221e-16	1.16661e-13	6h_vs_1h	ENSMUSG00000027078	Ube2l6
ENSMUSG00000027293	2082	1482	1462	1491	5152	7024	3039.91	1.69464	0.219867	5.04689	4.49057e-07	3.69326e-05	6h_vs_1h	ENSMUSG00000027293	Ehd4
ENSMUSG00000027360	1	1	8	2	137	188	54.4131	4.65476	0.666812	6.1033	1.03899e-09	1.15507e-07	6h_vs_1h	ENSMUSG00000027360	Hdc
ENSMUSG00000027366	2483	1619	1440	1446	4809	6700	2983.88	1.64187	0.220748	4.78767	1.68729e-06	0.000128298	6h_vs_1h	ENSMUSG00000027366	Sppl2a
ENSMUSG00000027514	2	4	73	31	1444	1120	463.576	4.34771	0.533155	7.05743	1.69606e-12	2.53153e-10	6h_vs_1h	ENSMUSG00000027514	Zbp1
ENSMUSG00000027580	543	370	3057	2254	8589	15371	4925.78	1.76184	0.270786	4.34602	1.38631e-05	0.00091411	6h_vs_1h	ENSMUSG00000027580	Helz2
ENSMUSG00000027639	1208	650	1386	798	6190	9567	3184.69	2.45654	0.353024	5.30146	1.14882e-07	1.00103e-05	6h_vs_1h	ENSMUSG00000027639	Samhd1
ENSMUSG00000027669	1230	1304	729	1076	4386	8002	2635.08	2.39134	0.290937	6.2087	5.34237e-10	6.10773e-08	6h_vs_1h	ENSMUSG00000027669	Gnb4
ENSMUSG00000027931	13	3	5	4	96	77	33.4929	4.00244	0.789975	4.32601	1.51832e-05	0.000986911	6h_vs_1h	ENSMUSG00000027931	Npr1
ENSMUSG00000027951	931	623	1219	1120	3997	6081	2281.8	1.7339	0.221522	5.18639	2.14412e-07	1.80959e-05	6h_vs_1h	ENSMUSG00000027951	Adar
ENSMUSG00000027995	256	223	148	165	539	807	343.325	1.7408	0.260624	4.43473	9.21886e-06	0.000627038	6h_vs_1h	ENSMUSG00000027995	Tlr2
ENSMUSG00000028028	467	284	309	234	822	1511	572.798	1.68929	0.286232	3.85803	0.000114305	0.00644266	6h_vs_1h	ENSMUSG00000028028	Alpk1
ENSMUSG00000028037	32	21	583	365	11911	17245	4838.16	4.56407	0.327206	12.1607	5.02994e-34	1.15832e-30	6h_vs_1h	ENSMUSG00000028037	Ifi44
ENSMUSG00000028159	220	177	117	179	463	981	333.38	1.87373	0.29761	4.33025	1.48938e-05	0.000972019	6h_vs_1h	ENSMUSG00000028159	Dapp1
ENSMUSG00000028214	177	92	109	123	326	606	226.549	1.60577	0.293784	3.47457	0.000511664	0.0251464	6h_vs_1h	ENSMUSG00000028214	Gem
ENSMUSG00000028268	44	16	784	324	11038	17976	4783.05	4.2953	0.460003	8.06582	7.27458e-16	1.86137e-13	6h_vs_1h	ENSMUSG00000028268	Gbp3
ENSMUSG00000028270	437	187	1558	685	17252	26614	7466.9	3.88587	0.441179	7.48192	7.32429e-14	1.28334e-11	6h_vs_1h	ENSMUSG00000028270	Gbp2
ENSMUSG00000028841	3	0	10	8	80	213	47.2855	3.55939	0.602596	4.93596	7.97594e-07	6.27181e-05	6h_vs_1h	ENSMUSG00000028841	Cnksr1
ENSMUSG00000028954	1545	1120	1094	1055	2676	5442	2040.38	1.49416	0.226644	4.01142	6.03552e-05	0.00365761	6h_vs_1h	ENSMUSG00000028954	Nub1
ENSMUSG00000028995	1150	933	663	732	2419	4080	1584.99	1.83517	0.20596	6.06999	1.2792e-09	1.39329e-07	6h_vs_1h	ENSMUSG00000028995	Fam126a
ENSMUSG00000029298	23	9	133	28	3156	4650	1276.39	5.18675	0.594423	7.74154	9.82218e-15	1.9309e-12	6h_vs_1h	ENSMUSG00000029298	Gbp9
ENSMUSG00000029322	129	75	99	102	1547	1220	543.322	3.53315	0.398118	7.40522	1.30931e-13	2.24533e-11	6h_vs_1h	ENSMUSG00000029322	Plac8
ENSMUSG00000029330	50	22	33	24	184	227	87.8874	2.50803	0.446273	4.30908	1.63935e-05	0.0010613	6h_vs_1h	ENSMUSG00000029330	Cds1
ENSMUSG00000029405	3247	2393	2132	1996	5930	8919	3966.05	1.47628	0.214634	4.15256	3.28783e-05	0.00205426	6h_vs_1h	ENSMUSG00000029405	G3bp2
ENSMUSG00000029417	0	1	7	4	78	123	34.0516	3.80798	0.671755	4.79785	1.60377e-06	0.000122525	6h_vs_1h	ENSMUSG00000029417	Cxcl9
ENSMUSG00000029561	8	4	189	78	4665	5486	1714.68	4.89515	0.455406	9.46442	2.95203e-21	1.48709e-18	6h_vs_1h	ENSMUSG00000029561	Oasl2
ENSMUSG00000029605	19	9	278	152	955	1549	485.283	2.13801	0.38289	4.05601	4.99172e-05	0.00307124	6h_vs_1h	ENSMUSG00000029605	Oas1b
ENSMUSG00000029640	914	798	584	650	1536	3569	1254.41	1.60819	0.267869	3.81973	0.000133597	0.00740062	6h_vs_1h	ENSMUSG00000029640	Usp12
ENSMUSG00000029771	169	107	91	114	1081	2369	599.722	3.6465	0.277106	11.0481	2.23826e-28	1.89898e-25	6h_vs_1h	ENSMUSG00000029771	Irf5
ENSMUSG00000029780	360	242	203	202	950	1821	589.711	2.36385	0.237548	7.48838	6.97309e-14	1.23523e-11	6h_vs_1h	ENSMUSG00000029780	Nt5c3
ENSMUSG00000029798	41	23	97	49	1737	2742	743.147	4.54114	0.379619	10.4214	1.9809e-25	1.33051e-22	6h_vs_1h	ENSMUSG00000029798	Herc6
ENSMUSG00000029826	1486	1101	2276	2089	8182	12629	4529.26	1.87722	0.216163	5.97798	2.25916e-09	2.38024e-07	6h_vs_1h	ENSMUSG00000029826	Zc3hav1
ENSMUSG00000029923	1	1	4	1	41	61	17.4952	3.96856	0.936787	3.61188	0.000303988	0.0153614	6h_vs_1h	ENSMUSG00000029923	Rab19
ENSMUSG00000030102	2669	1503	1496	1296	5213	6362	3011.93	1.71644	0.284088	3.98271	6.81326e-05	0.00402307	6h_vs_1h	ENSMUSG00000030102	Itpr1
ENSMUSG00000030107	16	12	1273	816	7979	16819	4196.67	3.1233	0.333377	7.61391	2.65932e-14	4.92739e-12	6h_vs_1h	ENSMUSG00000030107	Usp18
ENSMUSG00000030275	1996	1536	1499	1403	6495	12558	3999.62	2.29904	0.222683	7.69723	1.39042e-14	2.66829e-12	6h_vs_1h	ENSMUSG00000030275	Etnk1
ENSMUSG00000030921	6	3	21	8	2079	2579	762.563	6.97998	0.446238	14.3309	1.40338e-46	2.26224e-42	6h_vs_1h	ENSMUSG00000030921	Trim30a
ENSMUSG00000031266	244	207	160	223	511	981	368.885	1.56295	0.270667	3.6131	0.000302561	0.0153374	6h_vs_1h	ENSMUSG00000031266	Gla
ENSMUSG00000031557	669	528	371	328	1289	2439	881.093	2.00176	0.245249	5.77683	7.61227e-09	7.39216e-07	6h_vs_1h	ENSMUSG00000031557	Plekha2
ENSMUSG00000031639	44	23	172	66	2118	3357	919.105	4.11349	0.452535	7.79717	6.33132e-15	1.27576e-12	6h_vs_1h	ENSMUSG00000031639	Tlr3
ENSMUSG00000031712	9	10	10	5	96	245	56.3798	4.04053	0.601233	5.7474	9.06236e-09	8.6441e-07	6h_vs_1h	ENSMUSG00000031712	Il15
ENSMUSG00000031897	288	180	334	274	3304	5708	1588.9	3.48974	0.252585	11.5	1.31879e-30	1.77158e-27	6h_vs_1h	ENSMUSG00000031897	Psmb10
ENSMUSG00000032322	49	47	22	27	220	325	109.812	3.11576	0.383423	6.60044	4.09929e-11	5.28645e-09	6h_vs_1h	ENSMUSG00000032322	Pstpip1
ENSMUSG00000032372	109	65	192	122	1347	2605	694.067	3.22497	0.330207	7.99489	1.29686e-15	3.16748e-13	6h_vs_1h	ENSMUSG00000032372	Plscr2
ENSMUSG00000032596	154	80	540	264	2798	3536	1223.09	2.61505	0.410976	4.93959	7.82884e-07	6.21679e-05	6h_vs_1h	ENSMUSG00000032596	Uba7
ENSMUSG00000032661	0	0	9	5	419	719	179.949	5.95059	0.501064	10.7084	9.29651e-27	6.81181e-24	6h_vs_1h	ENSMUSG00000032661	Oas3
ENSMUSG00000032690	0	1	11	7	527	853	220.17	5.8771	0.456443	11.5942	4.40893e-31	6.46108e-28	6h_vs_1h	ENSMUSG00000032690	Oas2
ENSMUSG00000032698	4	2	11	4	225	341	93.392	4.85681	0.54492	7.83934	4.52919e-15	9.36032e-13	6h_vs_1h	ENSMUSG00000032698	Lmo2
ENSMUSG00000033213	0	0	3	5	32	131	24.6113	3.8371	0.870981	3.73384	0.000188585	0.010033	6h_vs_1h	ENSMUSG00000033213	AA467197
ENSMUSG00000033355	20	14	538	320	1664	2441	833.798	1.87514	0.35046	3.68129	0.000232061	0.0120672	6h_vs_1h	ENSMUSG00000033355	Rtp4
ENSMUSG00000033487	1738	1096	1238	1164	5097	8833	3038.87	2.13986	0.216422	7.18438	6.75122e-13	1.07752e-10	6h_vs_1h	ENSMUSG00000033487	Fndc3a
ENSMUSG00000033576	41	15	158	54	1566	1897	614.979	3.66511	0.520575	5.91675	3.28363e-09	3.39308e-07	6h_vs_1h	ENSMUSG00000033576	Apol6
ENSMUSG00000033715	48	30	43	27	190	268	98.0654	2.34029	0.408506	4.29686	1.73237e-05	0.00111703	6h_vs_1h	ENSMUSG00000033715	Akr1c14
ENSMUSG00000033781	156	142	101	131	789	1198	402.542	2.73744	0.272564	7.89702	2.85657e-15	6.13973e-13	6h_vs_1h	ENSMUSG00000033781	Asb13
ENSMUSG00000033847	8	6	10	2	72	95	31.3289	3.42686	0.731421	3.88539	0.000102164	0.00584004	6h_vs_1h	ENSMUSG00000033847	Pla2g4c
ENSMUSG00000033880	230	97	300	203	3001	3702	1234.29	3.39013	0.370821	7.56465	3.88917e-14	6.96593e-12	6h_vs_1h	ENSMUSG00000033880	Lgals3bp
ENSMUSG00000034218	913	603	532	528	2097	4178	1380.49	2.14726	0.226494	6.89756	5.29051e-12	7.41592e-10	6h_vs_1h	ENSMUSG00000034218	Atm
ENSMUSG00000034422	84	59	1342	687	9547	16068	4436.12	3.24393	0.370989	7.16713	7.65841e-13	1.21033e-10	6h_vs_1h	ENSMUSG00000034422	Parp14
ENSMUSG00000034484	1014	866	535	732	1559	2793	1190.61	1.39297	0.239133	3.37876	0.000728138	0.0351425	6h_vs_1h	ENSMUSG00000034484	Snx2
ENSMUSG00000034485	1184	1088	591	980	2686	5770	1912.97	2.01648	0.302685	4.72926	2.25345e-06	0.000168956	6h_vs_1h	ENSMUSG00000034485	Uaca
ENSMUSG00000034614	533	385	220	263	622	1244	508.486	1.53873	0.239137	3.98822	6.65718e-05	0.00397195	6h_vs_1h	ENSMUSG00000034614	Pik3ip1
ENSMUSG00000034708	1843	1345	1066	1510	3426	5550	2363.77	1.4332	0.223009	3.80344	0.000142702	0.00779782	6h_vs_1h	ENSMUSG00000034708	Grn
ENSMUSG00000034855	5	6	547	235	17719	29347	7519.93	5.49453	0.431837	11.3689	5.97076e-30	7.19015e-27	6h_vs_1h	ENSMUSG00000034855	Cxcl10
ENSMUSG00000034947	70	53	91	111	942	1360	423.977	3.15643	0.262283	9.80404	1.08172e-22	5.81243e-20	6h_vs_1h	ENSMUSG00000034947	Tmem106a
ENSMUSG00000034997	777	591	602	677	1423	2891	1105.39	1.3373	0.224035	3.35796	0.000785207	0.0376713	6h_vs_1h	ENSMUSG00000034997	Htr2a
ENSMUSG00000035151	577	390	381	332	1213	2188	803.446	1.84862	0.24122	5.23846	1.6192e-07	1.3958e-05	6h_vs_1h	ENSMUSG00000035151	Elmod2
ENSMUSG00000035208	8	1	38	12	299	506	137.064	3.58807	0.565711	5.30849	1.10538e-07	9.70178e-06	6h_vs_1h	ENSMUSG00000035208	Slfn8
ENSMUSG00000035248	2058	1394	1271	1220	2989	5041	2230.67	1.29838	0.20642	3.45598	0.000548291	0.0268646	6h_vs_1h	ENSMUSG00000035248	Tut7
ENSMUSG00000035517	823	563	852	736	3543	6497	2063.26	2.25113	0.234279	7.11172	1.14604e-12	1.7936e-10	6h_vs_1h	ENSMUSG00000035517	Tdrd7
ENSMUSG00000035561	19	33	16	21	220	562	131.085	3.9511	0.500077	6.73117	1.68301e-11	2.24216e-09	6h_vs_1h	ENSMUSG00000035561	Aldh1b1
ENSMUSG00000035566	89	22	63	30	261	490	148.908	2.58151	0.549666	3.63223	0.000280984	0.0143792	6h_vs_1h	ENSMUSG00000035566	Pcdh17
ENSMUSG00000035692	30	9	839	607	6589	9761	2894.41	3.12136	0.334954	7.57228	3.66742e-14	6.64255e-12	6h_vs_1h	ENSMUSG00000035692	Isg15
ENSMUSG00000035852	1	1	7	6	75	190	42.2749	3.89461	0.632772	5.23034	1.69203e-07	1.44865e-05	6h_vs_1h	ENSMUSG00000035852	Misp
ENSMUSG00000035929	69	34	149	66	2513	3152	975.784	4.35729	0.433627	8.69938	3.33691e-18	1.16937e-15	6h_vs_1h	ENSMUSG00000035929	H2-Q4
ENSMUSG00000036249	182	157	192	182	1092	1691	562.17	2.5208	0.252036	7.68064	1.58294e-14	2.9671e-12	6h_vs_1h	ENSMUSG00000036249	Rbm43
ENSMUSG00000036833	180	197	122	160	843	1830	514.519	2.82188	0.319308	7.0054	2.46277e-12	3.60907e-10	6h_vs_1h	ENSMUSG00000036833	Pnpla7
ENSMUSG00000036908	240	116	118	118	465	760	287.033	1.99341	0.300696	4.68384	2.81554e-06	0.000207245	6h_vs_1h	ENSMUSG00000036908	Unc93b1
ENSMUSG00000036912	0	2	1	2	49	80	21.1256	5.0525	1.04926	4.25777	2.06474e-05	0.00132078	6h_vs_1h	ENSMUSG00000036912	Piwil4
ENSMUSG00000036986	607	275	655	515	2576	3050	1274.3	1.93218	0.342182	3.93704	8.2494e-05	0.00480073	6h_vs_1h	ENSMUSG00000036986	Pml
ENSMUSG00000037242	12177	9903	8086	8888	24306	40404	16614.1	1.54829	0.195066	4.93828	7.88143e-07	6.22787e-05	6h_vs_1h	ENSMUSG00000037242	Clic4
ENSMUSG00000037321	389	206	1262	811	8739	16527	4391.05	3.18062	0.328484	7.90183	2.74846e-15	5.98718e-13	6h_vs_1h	ENSMUSG00000037321	Tap1
ENSMUSG00000037419	542	465	365	524	2459	3866	1314.38	2.46857	0.248033	7.59403	3.10105e-14	5.68055e-12	6h_vs_1h	ENSMUSG00000037419	Endod1
ENSMUSG00000037440	32	10	24	20	157	240	77.0841	2.79854	0.470059	4.70908	2.48842e-06	0.000184854	6h_vs_1h	ENSMUSG00000037440	Vnn1
ENSMUSG00000037490	47	28	25	27	111	183	66.6558	2.11792	0.402792	3.80573	0.000141389	0.00775235	6h_vs_1h	ENSMUSG00000037490	Slc2a12
ENSMUSG00000037622	547	331	317	328	1410	1997	792.988	2.04534	0.23977	6.09057	1.12507e-09	1.24221e-07	6h_vs_1h	ENSMUSG00000037622	Wdtc1
ENSMUSG00000037816	296	231	156	216	451	925	357.191	1.47692	0.271869	3.28069	0.00103554	0.0488095	6h_vs_1h	ENSMUSG00000037816	Fbxw17
ENSMUSG00000037826	231	201	266	246	1036	2030	633.963	2.16464	0.259718	6.08215	1.18583e-09	1.30038e-07	6h_vs_1h	ENSMUSG00000037826	Ppm1k
ENSMUSG00000037921	2	3	84	22	1661	4128	884.12	5.2733	0.558799	8.38996	4.86319e-17	1.47915e-14	6h_vs_1h	ENSMUSG00000037921	Ddx60
ENSMUSG00000037940	48	19	34	16	147	218	76.9908	2.48143	0.515422	3.67937	0.000233813	0.0121192	6h_vs_1h	ENSMUSG00000037940	Inpp4b
ENSMUSG00000037997	328	225	247	225	1793	3276	954.351	3.0192	0.234834	10.3656	3.5547e-25	2.29207e-22	6h_vs_1h	ENSMUSG00000037997	Parp11
ENSMUSG00000038058	376	314	300	341	1131	1899	698.615	1.85803	0.224632	5.6672	1.45154e-08	1.36835e-06	6h_vs_1h	ENSMUSG00000038058	Nod1
ENSMUSG00000038213	114	131	87	100	468	955	289.558	2.51143	0.331805	5.80591	6.40171e-09	6.33101e-07	6h_vs_1h	ENSMUSG00000038213	Tapbpl
ENSMUSG00000038301	160	155	95	132	333	1109	297.77	2.179	0.403826	3.94725	7.9054e-05	0.00461721	6h_vs_1h	ENSMUSG00000038301	Snx10
ENSMUSG00000038507	499	351	726	576	7885	14913	3887.5	3.71189	0.25535	12.2455	1.77566e-34	5.72473e-31	6h_vs_1h	ENSMUSG00000038507	Parp12
ENSMUSG00000038774	2841	1782	1708	1660	6474	10336	3952.08	1.93943	0.210641	6.43002	1.27586e-10	1.58206e-08	6h_vs_1h	ENSMUSG00000038774	Ascc3
ENSMUSG00000038884	125	51	119	103	506	767	269.674	2.14536	0.344526	4.52901	5.92608e-06	0.000417155	6h_vs_1h	ENSMUSG00000038884	A230050P20Rik
ENSMUSG00000039146	0	0	2	1	791	1184	313.256	8.99792	0.882929	9.52843	1.59685e-21	8.30363e-19	6h_vs_1h	ENSMUSG00000039146	Ifi44l
ENSMUSG00000039236	24	21	36	22	396	529	166.83	3.63718	0.396679	7.69433	1.42233e-14	2.69741e-12	6h_vs_1h	ENSMUSG00000039236	Isg20
ENSMUSG00000039285	1544	1175	1006	1099	2653	4558	1923.86	1.38788	0.194987	4.1176	3.82835e-05	0.00237358	6h_vs_1h	ENSMUSG00000039285	Azi2
ENSMUSG00000039304	2	2	30	15	438	609	177.228	4.17112	0.435968	8.22565	1.94129e-16	5.49011e-14	6h_vs_1h	ENSMUSG00000039304	Tnfsf10
ENSMUSG00000039501	1151	705	1936	1547	6386	10373	3591.31	1.87563	0.255363	5.05409	4.32439e-07	3.57483e-05	6h_vs_1h	ENSMUSG00000039501	Znfx1
ENSMUSG00000039616	80	74	47	73	416	752	226.238	2.89601	0.320394	7.21304	5.47146e-13	8.90909e-11	6h_vs_1h	ENSMUSG00000039616	Mocos
ENSMUSG00000039697	279	211	567	382	2279	4003	1237.62	2.31567	0.299911	5.7706	7.89896e-09	7.62463e-07	6h_vs_1h	ENSMUSG00000039697	Ncoa7
ENSMUSG00000039699	2	3	11	9	100	350	69.3144	3.98415	0.597551	5.68846	1.28188e-08	1.21552e-06	6h_vs_1h	ENSMUSG00000039699	Batf2
ENSMUSG00000039853	0	0	6	3	260	514	120.185	6.00792	0.600091	9.03684	1.6127e-19	6.66583e-17	6h_vs_1h	ENSMUSG00000039853	Trim14
ENSMUSG00000039899	464	363	668	463	2801	5050	1561.02	2.38046	0.292822	6.13156	8.702e-10	9.7414e-08	6h_vs_1h	ENSMUSG00000039899	Fgl2
ENSMUSG00000039983	318	271	185	189	696	1180	450.307	1.93833	0.245367	5.51555	3.47684e-08	3.20267e-06	6h_vs_1h	ENSMUSG00000039983	Ccdc32
ENSMUSG00000039997	94	76	945	560	6422	8757	2766.77	2.96414	0.344087	6.91436	4.6998e-12	6.64569e-10	6h_vs_1h	ENSMUSG00000039997	Ifi203
ENSMUSG00000040033	668	362	2986	2361	9178	12393	4696.26	1.6548	0.28765	3.71911	0.000199924	0.0105665	6h_vs_1h	ENSMUSG00000040033	Stat2
ENSMUSG00000040043	955	865	657	861	2481	4010	1578.81	1.7258	0.239341	4.76643	1.87522e-06	0.000141255	6h_vs_1h	ENSMUSG00000040043	Rbms2
ENSMUSG00000040253	141	59	1416	688	8760	13965	4032.63	3.0268	0.418288	5.8376	5.29569e-09	5.26954e-07	6h_vs_1h	ENSMUSG00000040253	Gbp7
ENSMUSG00000040264	286	159	1519	573	29743	48128	12702.6	4.80067	0.452859	9.30901	1.29024e-20	5.9425e-18	6h_vs_1h	ENSMUSG00000040264	Gbp2b
ENSMUSG00000040296	843	617	1411	1463	4695	12458	3318.23	2.11144	0.284203	5.37097	7.83154e-08	7.01358e-06	6h_vs_1h	ENSMUSG00000040296	Ddx58
ENSMUSG00000040328	5	0	18	12	581	1030	256.387	5.34524	0.40831	11.6584	2.07928e-31	3.72423e-28	6h_vs_1h	ENSMUSG00000040328	Olfr56
ENSMUSG00000040329	31	26	20	25	162	293	87.3461	2.94454	0.393001	6.00391	1.92623e-09	2.04282e-07	6h_vs_1h	ENSMUSG00000040329	Il7
ENSMUSG00000040414	371	262	285	287	714	1259	509.06	1.39066	0.225705	3.56955	0.000357599	0.0179022	6h_vs_1h	ENSMUSG00000040414	Slc25a28
ENSMUSG00000040428	295	113	429	233	2406	3187	1089.75	2.71104	0.423166	5.02413	5.05716e-07	4.09655e-05	6h_vs_1h	ENSMUSG00000040428	Plekha4
ENSMUSG00000040483	147	40	492	296	3310	3826	1354.51	2.8398	0.466316	4.83535	1.32913e-06	0.000102027	6h_vs_1h	ENSMUSG00000040483	Xaf1
ENSMUSG00000040613	54	74	125	99	560	1436	360.316	2.68669	0.401882	5.22963	1.69848e-07	1.44865e-05	6h_vs_1h	ENSMUSG00000040613	Apobec1
ENSMUSG00000041827	0	0	328	174	2972	5794	1446.53	3.68795	0.390983	7.93627	2.08346e-15	4.66464e-13	6h_vs_1h	ENSMUSG00000041827	Oasl1
ENSMUSG00000041945	133	101	59	79	318	504	189.255	2.20583	0.291445	5.56134	2.67708e-08	2.49448e-06	6h_vs_1h	ENSMUSG00000041945	Mfsd9
ENSMUSG00000042350	1312	869	755	797	2488	4342	1672.78	1.74517	0.199896	5.80389	6.47949e-09	6.36886e-07	6h_vs_1h	ENSMUSG00000042350	Arel1
ENSMUSG00000042726	903	686	632	599	3980	7212	2199.29	2.7811	0.216111	10.1619	2.93173e-24	1.81767e-21	6h_vs_1h	ENSMUSG00000042726	Trafd1
ENSMUSG00000042812	139	102	143	152	419	833	284.373	1.6717	0.262171	4.145	3.39814e-05	0.00211498	6h_vs_1h	ENSMUSG00000042812	Foxf1
ENSMUSG00000042842	127	69	68	52	304	469	172.75	2.30724	0.339923	5.06657	4.05053e-07	3.3657e-05	6h_vs_1h	ENSMUSG00000042842	Serpinb6b
ENSMUSG00000042901	1403	1057	904	924	3129	4754	1956.07	1.73956	0.205687	5.61318	1.98641e-08	1.86168e-06	6h_vs_1h	ENSMUSG00000042901	Aida
ENSMUSG00000043263	0	2	4	3	190	462	98.992	6.09209	0.680693	8.09041	5.94651e-16	1.54609e-13	6h_vs_1h	ENSMUSG00000043263	Ifi209
ENSMUSG00000043953	5	1	26	16	681	1471	334.866	5.23897	0.400698	11.6147	3.47192e-31	5.59673e-28	6h_vs_1h	ENSMUSG00000043953	Ccrl2
ENSMUSG00000044703	0	0	0	0	66	188	37.2002	8.95953	1.55688	5.37903	7.48866e-08	6.74398e-06	6h_vs_1h	ENSMUSG00000044703	Phf11a
ENSMUSG00000045795	176	169	113	185	505	1049	344.459	1.97554	0.324425	4.28615	1.81794e-05	0.00116754	6h_vs_1h	ENSMUSG00000045795	Whamm
ENSMUSG00000045827	446	209	260	197	1953	2603	912.456	2.96157	0.33047	7.19149	6.40875e-13	1.03309e-10	6h_vs_1h	ENSMUSG00000045827	Serpinb9
ENSMUSG00000045932	638	363	989	589	30965	47793	12879.3	5.24857	0.336679	13.8517	1.24274e-43	1.00165e-39	6h_vs_1h	ENSMUSG00000045932	Ifit2
ENSMUSG00000046031	1	1	10	13	56	142	34.3236	2.6601	0.593881	3.49413	0.000475612	0.0234461	6h_vs_1h	ENSMUSG00000046031	Calhm6
ENSMUSG00000046157	60	32	49	31	374	354	150.984	2.88688	0.450509	5.10952	3.22983e-07	2.69766e-05	6h_vs_1h	ENSMUSG00000046157	Tmem229b
ENSMUSG00000046688	83	79	97	64	334	695	212.245	2.23813	0.366696	4.50818	6.53861e-06	0.000452371	6h_vs_1h	ENSMUSG00000046688	Tifa
ENSMUSG00000046718	146	136	414	378	4334	5674	1813.14	3.31382	0.272112	10.0283	1.14469e-23	6.83421e-21	6h_vs_1h	ENSMUSG00000046718	Bst2
ENSMUSG00000046805	15	5	23	9	289	352	113.451	3.97304	0.530373	6.38803	1.68038e-10	2.0521e-08	6h_vs_1h	ENSMUSG00000046805	Mpeg1
ENSMUSG00000046879	364	344	4164	2794	11663	18498	6274.67	1.72237	0.314355	3.61812	0.000296756	0.0151206	6h_vs_1h	ENSMUSG00000046879	Irgm1
ENSMUSG00000047067	53	56	43	49	427	754	217.186	3.29054	0.325842	8.30323	1.01321e-16	3.02462e-14	6h_vs_1h	ENSMUSG00000047067	Dusp28
ENSMUSG00000047735	814	406	2540	1553	13246	23828	6742.59	2.75924	0.345983	6.28425	3.29446e-10	3.90491e-08	6h_vs_1h	ENSMUSG00000047735	Samd9l
ENSMUSG00000048186	8	6	4	3	59	107	29.0086	4.1671	0.740235	4.83914	1.304e-06	0.000100576	6h_vs_1h	ENSMUSG00000048186	Bend7
ENSMUSG00000048388	352	282	242	278	837	1136	509.472	1.57899	0.249276	3.9875	6.67741e-05	0.00397195	6h_vs_1h	ENSMUSG00000048388	Fam171b
ENSMUSG00000048852	0	2	34	8	349	636	161.296	4.11218	0.595079	5.92726	3.08039e-09	3.2036e-07	6h_vs_1h	ENSMUSG00000048852	Gm12185
ENSMUSG00000049191	244	173	136	133	472	601	285.298	1.65626	0.284208	3.76929	0.000163711	0.00882614	6h_vs_1h	ENSMUSG00000049191	Rtl5
ENSMUSG00000049488	200	133	108	126	452	646	267.625	1.87593	0.266228	4.84896	1.24111e-06	9.61862e-05	6h_vs_1h	ENSMUSG00000049488	Tmem67
ENSMUSG00000049502	291	151	1849	1118	5917	8711	2993.43	1.9179	0.346915	3.84215	0.000121959	0.00677926	6h_vs_1h	ENSMUSG00000049502	Dtx3l
ENSMUSG00000049659	1101	1061	708	894	2054	4692	1641.28	1.64139	0.282543	3.73887	0.000184851	0.0098669	6h_vs_1h	ENSMUSG00000049659	Aftph
ENSMUSG00000050002	225	219	157	200	534	1081	380.824	1.76632	0.288792	4.09057	4.30312e-05	0.00265771	6h_vs_1h	ENSMUSG00000050002	Idnk
ENSMUSG00000050014	3	2	3	5	100	155	42.4752	4.62869	0.681163	5.93645	2.91258e-09	3.04875e-07	6h_vs_1h	ENSMUSG00000050014	Apol10b
ENSMUSG00000050565	3875	2448	3178	2801	10000	14419	5963.92	1.66478	0.237091	4.5543	5.25606e-06	0.000371612	6h_vs_1h	ENSMUSG00000050565	Tor1aip2
ENSMUSG00000052776	8	0	25	12	982	1839	442.747	5.81943	1.05531	4.96008	7.0463e-07	5.64675e-05	6h_vs_1h	ENSMUSG00000052776	Oas1a
ENSMUSG00000053835	7	2	16	13	228	246	85.3441	3.71781	0.498303	6.28696	3.2374e-10	3.8657e-08	6h_vs_1h	ENSMUSG00000053835	H2-T24
ENSMUSG00000053846	119	111	68	77	731	899	326.246	3.16333	0.316216	8.15368	3.53012e-16	9.64499e-14	6h_vs_1h	ENSMUSG00000053846	Lipg
ENSMUSG00000054072	24	15	5258	1496	29486	42832	12919.1	3.01429	0.524805	4.62894	3.67536e-06	0.000266878	6h_vs_1h	ENSMUSG00000054072	Iigp1
ENSMUSG00000054203	11	10	152	85	1649	2281	680.498	3.6791	0.372994	8.29529	1.08316e-16	3.17465e-14	6h_vs_1h	ENSMUSG00000054203	Ifi205
ENSMUSG00000054404	45	9	414	137	3812	5756	1635.3	3.70988	0.574082	5.44326	5.23153e-08	4.79161e-06	6h_vs_1h	ENSMUSG00000054404	Slfn5
ENSMUSG00000054676	642	450	335	425	941	1628	702.34	1.373	0.217824	3.6176	0.000297347	0.0151206	6h_vs_1h	ENSMUSG00000054676	1600014C10Rik
ENSMUSG00000054728	27	24	12	15	86	188	53.952	2.91967	0.489365	4.77082	1.83474e-06	0.000138854	6h_vs_1h	ENSMUSG00000054728	Phactr1
ENSMUSG00000055447	895	778	710	823	2707	4630	1686.03	1.87341	0.218806	5.88839	3.8998e-09	4.00413e-07	6h_vs_1h	ENSMUSG00000055447	Cd47
ENSMUSG00000055670	2886	2339	1925	2186	4780	10116	3816.04	1.43339	0.229107	3.70301	0.000213053	0.0111507	6h_vs_1h	ENSMUSG00000055670	Zzef1
ENSMUSG00000056116	373	283	631	473	3364	5276	1676.86	2.58175	0.270606	7.37883	1.59692e-13	2.70972e-11	6h_vs_1h	ENSMUSG00000056116	H2-T22
ENSMUSG00000057137	114	72	154	149	833	2084	520.598	2.80992	0.304797	7.29968	2.88461e-13	4.7938e-11	6h_vs_1h	ENSMUSG00000057137	Tmem140
ENSMUSG00000057143	385	291	398	378	974	2095	715.797	1.55091	0.254673	3.79273	0.000148998	0.00811433	6h_vs_1h	ENSMUSG00000057143	Trim12c
ENSMUSG00000057346	7	9	77	79	352	636	186.84	2.26429	0.309422	5.4272	5.72452e-08	5.21352e-06	6h_vs_1h	ENSMUSG00000057346	Apol9a
ENSMUSG00000057554	1310	1053	1281	1031	6066	11184	3460.69	2.48601	0.254521	7.46898	8.08206e-14	1.40089e-11	6h_vs_1h	ENSMUSG00000057554	Lgals8
ENSMUSG00000057596	0	0	0	0	54	54	18.0001	7.9013	1.63166	4.48396	7.32691e-06	0.000502595	6h_vs_1h	ENSMUSG00000057596	Trim30d
ENSMUSG00000058163	0	1	5	3	194	401	92.2781	5.79263	0.63707	8.17436	2.97453e-16	8.26714e-14	6h_vs_1h	ENSMUSG00000058163	Gm5431
ENSMUSG00000058589	74	52	43	48	222	325	122.545	2.22701	0.328464	4.99906	5.76098e-07	4.64335e-05	6h_vs_1h	ENSMUSG00000058589	Anks1b
ENSMUSG00000060519	391	425	1583	1274	11374	18894	5430.66	3.0105	0.298529	8.12484	4.47961e-16	1.18379e-13	6h_vs_1h	ENSMUSG00000060519	Tor3a
ENSMUSG00000060802	5575	2876	3901	3427	12635	16395	7305.54	1.64013	0.283573	3.72083	0.000198568	0.0105293	6h_vs_1h	ENSMUSG00000060802	B2m
ENSMUSG00000061013	226	112	124	108	432	542	250.059	1.72913	0.336586	3.39922	0.000675771	0.0328116	6h_vs_1h	ENSMUSG00000061013	Mkx
ENSMUSG00000061232	650	554	500	536	4531	6718	2160.91	3.07823	0.223735	11.1437	7.68605e-29	7.28818e-26	6h_vs_1h	ENSMUSG00000061232	H2-K1
ENSMUSG00000061288	420	361	297	338	993	1584	642.205	1.64707	0.232267	4.57263	4.8164e-06	0.000343541	6h_vs_1h	ENSMUSG00000061288	Taok3
ENSMUSG00000062007	0	0	0	1	39	69	16.9304	6.36533	1.59006	3.63529	0.000277665	0.0142546	6h_vs_1h	ENSMUSG00000062007	Hsh2d
ENSMUSG00000062488	11	5	683	289	10112	16868	4417.52	4.37594	0.435193	8.71095	3.01334e-18	1.07945e-15	6h_vs_1h	ENSMUSG00000062488	Ifit3b
ENSMUSG00000063268	124	46	330	229	2299	4624	1193.34	3.19647	0.36932	7.07104	1.53781e-12	2.33864e-10	6h_vs_1h	ENSMUSG00000063268	Parp10
ENSMUSG00000063286	5	3	7	4	281	333	103.503	5.47309	0.582034	8.39829	4.53027e-17	1.40438e-14	6h_vs_1h	ENSMUSG00000063286	Gm8995
ENSMUSG00000066677	0	0	4	2	193	213	68.0734	5.76338	0.745102	6.9499	3.65546e-12	5.26126e-10	6h_vs_1h	ENSMUSG00000066677	Ifi208
ENSMUSG00000066755	242	171	120	133	425	1168	342.116	2.188	0.327391	4.89629	9.76623e-07	7.60539e-05	6h_vs_1h	ENSMUSG00000066755	Tnfsf18
ENSMUSG00000066800	95	43	84	59	595	937	288.59	3.03439	0.353579	6.92741	4.28619e-12	6.11445e-10	6h_vs_1h	ENSMUSG00000066800	Rnasel
ENSMUSG00000067212	95	72	184	103	988	1232	442.196	2.59715	0.377294	5.3331	9.65507e-08	8.55163e-06	6h_vs_1h	ENSMUSG00000067212	H2-T23
ENSMUSG00000068245	45	22	263	155	3467	5755	1536.19	4.05849	0.350772	9.90241	4.06369e-23	2.25885e-20	6h_vs_1h	ENSMUSG00000068245	Phf11d
ENSMUSG00000068246	1	2	21	32	215	493	117.442	3.31147	0.41682	6.54113	6.10561e-11	7.7498e-09	6h_vs_1h	ENSMUSG00000068246	Apol9b
ENSMUSG00000068417	36	42	51	51	219	516	141.938	2.40537	0.385042	4.72772	2.27059e-06	0.000169453	6h_vs_1h	ENSMUSG00000068417	Pnp2
ENSMUSG00000068606	0	0	199	55	1113	1856	517.093	3.11706	0.561188	4.51196	6.42298e-06	0.000448218	6h_vs_1h	ENSMUSG00000068606	Gm4841
ENSMUSG00000069793	297	82	888	314	3812	4675	1678.39	2.45146	0.55765	3.34701	0.000816868	0.0389583	6h_vs_1h	ENSMUSG00000069793	Slfn9
ENSMUSG00000069892	30	22	28	39	218	397	115.64	2.80659	0.354636	6.26441	3.74242e-10	4.4035e-08	6h_vs_1h	ENSMUSG00000069892	9930111J21Rik2
ENSMUSG00000069893	8	19	13	11	66	150	41.4475	2.72895	0.640256	3.34858	0.000812261	0.0388536	6h_vs_1h	ENSMUSG00000069893	9930111J21Rik1
ENSMUSG00000070031	3	6	8	4	131	287	66.9363	4.68267	0.610914	6.70743	1.98078e-11	2.61723e-09	6h_vs_1h	ENSMUSG00000070031	Sp140
ENSMUSG00000070034	2	5	11	6	229	362	97.4885	4.73589	0.52089	7.96884	1.60165e-15	3.71518e-13	6h_vs_1h	ENSMUSG00000070034	Sp110
ENSMUSG00000070327	1667	1170	7079	4202	47622	91290	24038.1	3.18963	0.330522	7.88034	3.26484e-15	6.9249e-13	6h_vs_1h	ENSMUSG00000070327	Rnf213
ENSMUSG00000070427	41	27	28	32	178	208	84.5014	2.36418	0.405879	4.38353	1.16773e-05	0.000784324	6h_vs_1h	ENSMUSG00000070427	Il18bp
ENSMUSG00000070501	1	2	1	1	81	217	44.7985	6.75891	1.14169	5.4077	6.38408e-08	5.78154e-06	6h_vs_1h	ENSMUSG00000070501	Ifi214
ENSMUSG00000071350	268	136	309	198	1654	2341	795.375	2.60483	0.345084	5.85315	4.8234e-09	4.85957e-07	6h_vs_1h	ENSMUSG00000071350	Setdb2
ENSMUSG00000072620	14	13	63	57	506	1002	258.805	3.2335	0.312148	8.48476	2.16172e-17	7.11163e-15	6h_vs_1h	ENSMUSG00000072620	Slfn2
ENSMUSG00000072621	7	4	28	9	122	258	66.8598	2.90451	0.579867	4.00008	6.33219e-05	0.00382303	6h_vs_1h	ENSMUSG00000072621	Slfn10-ps
ENSMUSG00000073411	831	772	776	894	5517	8196	2736.34	2.6776	0.23756	8.80872	1.26587e-18	4.85853e-16	6h_vs_1h	ENSMUSG00000073411	H2-D1
ENSMUSG00000073489	386	275	945	768	8854	14207	4060.33	3.36313	0.244446	11.365	6.24455e-30	7.19015e-27	6h_vs_1h	ENSMUSG00000073489	Ifi204
ENSMUSG00000073490	3	0	47	21	215	329	100.404	2.60505	0.501045	4.03166	5.53833e-05	0.00336897	6h_vs_1h	ENSMUSG00000073490	Ifi207
ENSMUSG00000073555	1	0	49	20	638	723	237.796	3.95973	0.491601	6.86478	6.65948e-12	9.17528e-10	6h_vs_1h	ENSMUSG00000073555	Gm4951
ENSMUSG00000074151	12	7	83	39	4010	6062	1620.3	5.97582	0.392499	13.7346	6.30041e-43	3.38542e-39	6h_vs_1h	ENSMUSG00000074151	Nlrc5
ENSMUSG00000074896	29	9	1607	723	29526	51603	13083.4	4.69608	0.445352	9.23108	2.67913e-20	1.19965e-17	6h_vs_1h	ENSMUSG00000074896	Ifit3
ENSMUSG00000075602	1461	778	1167	942	5483	4747	2467.66	2.00263	0.373896	3.7915	0.000149738	0.0081272	6h_vs_1h	ENSMUSG00000075602	Ly6a
ENSMUSG00000078349	39	21	167	143	512	697	265.288	1.60761	0.306304	3.33855	0.000842156	0.0399281	6h_vs_1h	ENSMUSG00000078349	NA
ENSMUSG00000078606	9	4	13	11	203	414	100.587	4.2632	0.459973	7.99656	1.2794e-15	3.16748e-13	6h_vs_1h	ENSMUSG00000078606	Gm4070
ENSMUSG00000078616	0	1	0	0	106	251	53.5637	9.47944	1.5208	5.84853	4.95942e-09	4.96558e-07	6h_vs_1h	ENSMUSG00000078616	NA
ENSMUSG00000078853	54	20	1697	758	8049	11906	3685.21	2.62744	0.445883	4.58066	4.63521e-06	0.000333569	6h_vs_1h	ENSMUSG00000078853	Igtp
ENSMUSG00000078920	30	35	259	123	4095	5080	1576.55	4.22666	0.428364	8.50134	1.87419e-17	6.29414e-15	6h_vs_1h	ENSMUSG00000078920	Ifi47
ENSMUSG00000078921	4	0	45	22	1170	1927	498.728	5.12835	0.405169	11.2135	3.50181e-29	3.52807e-26	6h_vs_1h	ENSMUSG00000078921	Tgtp2
ENSMUSG00000078922	5	1	47	15	974	1682	426.654	4.99689	0.496298	8.8896	6.133e-19	2.41132e-16	6h_vs_1h	ENSMUSG00000078922	Tgtp1
ENSMUSG00000078954	17	13	9	16	121	227	62.6858	3.40575	0.481286	5.86085	4.6051e-09	4.69837e-07	6h_vs_1h	ENSMUSG00000078954	Arhgap8
ENSMUSG00000079017	68	25	33	26	356	251	129.761	3.12157	0.541084	4.68794	2.75972e-06	0.000204067	6h_vs_1h	ENSMUSG00000079017	Ifi27l2a
ENSMUSG00000079018	180	87	119	85	630	569	279.764	2.26712	0.421169	3.99393	6.49859e-05	0.00390885	6h_vs_1h	ENSMUSG00000079018	Ly6c1
ENSMUSG00000079197	264	222	302	257	786	1604	545.892	1.66846	0.27575	3.92916	8.52441e-05	0.00494293	6h_vs_1h	ENSMUSG00000079197	Psme2
ENSMUSG00000079339	16	10	538	179	5225	9013	2367.67	3.87933	0.48745	6.75828	1.39639e-11	1.89158e-09	6h_vs_1h	ENSMUSG00000079339	Ifit1bl1
ENSMUSG00000079363	0	1	24	3	697	887	261.926	5.48075	1.28296	3.81599	0.000135637	0.00748793	6h_vs_1h	ENSMUSG00000079363	Gbp4
ENSMUSG00000079491	17	15	20	16	211	319	95.637	3.50767	0.415936	7.02673	2.11436e-12	3.12693e-10	6h_vs_1h	ENSMUSG00000079491	H2-T10
ENSMUSG00000079659	23	22	8	16	94	107	44.0638	2.76058	0.55879	3.89337	9.88596e-05	0.00567124	6h_vs_1h	ENSMUSG00000079659	Tmem243
ENSMUSG00000082292	2	1	119	32	1837	2439	719.571	4.43651	0.55015	7.00083	2.54446e-12	3.69519e-10	6h_vs_1h	ENSMUSG00000082292	NA
ENSMUSG00000082361	24	20	15	29	345	539	154.083	3.9686	0.387142	8.73994	2.33236e-18	8.54492e-16	6h_vs_1h	ENSMUSG00000082361	Btc
ENSMUSG00000084846	6	2	6	2	61	85	26.0325	3.82006	0.778469	4.15568	3.24326e-05	0.00203429	6h_vs_1h	ENSMUSG00000084846	NA
ENSMUSG00000086184	3	2	6	4	56	128	30.3812	3.76016	0.697083	4.55492	5.2405e-06	0.000371612	6h_vs_1h	ENSMUSG00000086184	NA
ENSMUSG00000086513	2	1	3	5	50	57	19.5469	3.42935	0.809173	3.51513	0.000439542	0.0218013	6h_vs_1h	ENSMUSG00000086513	NA
ENSMUSG00000090125	6	7	7	7	83	127	37.8587	3.53703	0.599469	4.92441	8.46156e-07	6.62138e-05	6h_vs_1h	ENSMUSG00000090125	Pou3f1
ENSMUSG00000090222	4	6	61	39	462	570	189.58	3.02168	0.40461	6.0223	1.71954e-09	1.8357e-07	6h_vs_1h	ENSMUSG00000090222	NA
ENSMUSG00000090272	32	10	183	97	2056	3380	913.833	3.87233	0.412175	7.97556	1.51687e-15	3.59588e-13	6h_vs_1h	ENSMUSG00000090272	Mndal
ENSMUSG00000091144	15	11	35	21	166	201	74.8491	2.36786	0.463815	3.8439	0.000121095	0.00677793	6h_vs_1h	ENSMUSG00000091144	Phf11c
ENSMUSG00000091549	90	72	129	124	544	867	295.634	2.10024	0.263163	5.75781	8.52107e-09	8.17617e-07	6h_vs_1h	ENSMUSG00000091549	NA
ENSMUSG00000091649	0	1	1	1	708	1029	276.567	9.40453	1.06371	8.29131	1.12003e-16	3.2241e-14	6h_vs_1h	ENSMUSG00000091649	Phf11b
ENSMUSG00000092564	26	15	25	28	106	216	65.3263	2.18839	0.417074	3.84437	0.000120865	0.00677793	6h_vs_1h	ENSMUSG00000092564	BC051226
ENSMUSG00000093661	116	152	103	134	558	1035	331.999	2.35308	0.351727	5.02686	4.98567e-07	4.05904e-05	6h_vs_1h	ENSMUSG00000093661	Eif4e3
ENSMUSG00000096727	12	3	142	83	972	1393	424.965	3.01612	0.38986	6.23588	4.4926e-10	5.1729e-08	6h_vs_1h	ENSMUSG00000096727	Psmb9
ENSMUSG00000097000	133	74	91	65	298	442	177.122	1.86956	0.346478	3.70747	0.000209338	0.0110278	6h_vs_1h	ENSMUSG00000097000	NA
ENSMUSG00000097006	74	45	58	41	587	923	273.978	3.5467	0.326078	9.08279	1.05822e-19	4.48909e-17	6h_vs_1h	ENSMUSG00000097006	9530082P21Rik
ENSMUSG00000100706	7	4	6	4	47	88	24.3147	3.34551	0.708667	3.89535	9.80556e-05	0.0056452	6h_vs_1h	ENSMUSG00000100706	NA
ENSMUSG00000104654	1	0	2	0	41	53	15.71	5.19789	1.25868	3.66486	0.000247471	0.012786	6h_vs_1h	ENSMUSG00000104654	NA
ENSMUSG00000104713	2	0	28	10	307	424	125.11	3.88859	0.522182	6.32651	2.50767e-10	3.01668e-08	6h_vs_1h	ENSMUSG00000104713	Gbp6
ENSMUSG00000105096	0	0	0	0	22	25	7.70713	6.6786	1.82381	3.34114	0.000834358	0.0396751	6h_vs_1h	ENSMUSG00000105096	Gbp10
ENSMUSG00000105504	0	1	106	53	1122	1912	505.666	3.84097	0.40504	8.03864	9.08405e-16	2.28804e-13	6h_vs_1h	ENSMUSG00000105504	Gbp5
ENSMUSG00000108732	35	14	28	15	307	453	135.842	3.76506	0.450185	7.06389	1.6191e-12	2.43924e-10	6h_vs_1h	ENSMUSG00000108732	NA
ENSMUSG00000108801	13	21	13	20	93	224	58.9492	2.82914	0.539236	4.1617	3.15889e-05	0.00199692	6h_vs_1h	ENSMUSG00000108801	NA
ENSMUSG00000111118	0	3	0	0	27	61	13.7296	7.46704	1.70364	4.03961	5.35398e-05	0.00326917	6h_vs_1h	ENSMUSG00000111118	NA
ENSMUSG00000112627	117	72	72	71	291	395	164.664	1.91125	0.313171	4.23491	2.28642e-05	0.0014568	6h_vs_1h	ENSMUSG00000112627	4933412E12Rik
ENSMUSG00000115338	420	381	482	425	2259	4751	1361.01	2.51774	0.272766	7.08571	1.38335e-12	2.12377e-10	6h_vs_1h	ENSMUSG00000115338	Pnp
ENSMUSG00000116617	6	4	4	3	49	55	19.8799	3.57029	0.815792	3.65937	0.000252837	0.0130215	6h_vs_1h	ENSMUSG00000116617	NA
ENSMUSG00000116946	3	2	5	6	47	95	24.5604	3.2783	0.69552	3.87236	0.000107789	0.00609667	6h_vs_1h	ENSMUSG00000116946	NA

## Sheet: ISGs_in_NPCs
index	NPC_Ola_IFNb_0h_Rep3	NPC_Ola_IFNb_0h_Rep4	NPC_Ola_IFNb_0h_Rep5	NPC_Ola_IFNb_0h_Rep6	NPC_Ola_IFNb_1h_Rep3	NPC_Ola_IFNb_1h_Rep4	NPC_Ola_IFNb_1h_Rep5	NPC_Ola_IFNb_1h_Rep6	NPC_Ola_IFNb_6h_Rep3	NPC_Ola_IFNb_6h_Rep4	NPC_Ola_IFNb_6h_Rep5	NPC_Ola_IFNb_6h_Rep6	baseMean	log2FoldChange	lfcSE	stat	pvalue	padj	deseq_group	ENSEMBL	SYMBOL
ENSMUSG00000000386	0	0	1	0	37	86	73	67	589	449	1586	253	249.266	7.67237	1.11896	6.33387	2.39086e-10	1.25713e-07	1h_vs_0h	ENSMUSG00000000386	Mx1
ENSMUSG00000002325	160	204	312	134	1279	1392	1312	1483	1817	1801	2691	1153	1126.08	2.76942	0.205769	10.6159	2.5139e-26	4.75857e-23	1h_vs_0h	ENSMUSG00000002325	Irf9
ENSMUSG00000016496	17	18	15	20	157	124	264	123	223	241	630	166	164.656	3.25736	0.463239	5.76886	7.98083e-09	3.68461e-06	1h_vs_0h	ENSMUSG00000016496	Cd274
ENSMUSG00000018899	216	207	416	166	1304	1328	2015	1193	565	553	1427	338	798.374	2.60106	0.375662	5.36668	8.01981e-08	2.97661e-05	1h_vs_0h	ENSMUSG00000018899	Irf1
ENSMUSG00000020638	44	84	39	62	543	421	491	460	3194	2359	5587	1448	1205.27	3.04162	0.393016	6.25067	4.08686e-10	2.03579e-07	1h_vs_0h	ENSMUSG00000020638	Cmpk2
ENSMUSG00000020641	3	2	7	2	494	541	700	457	5468	5500	17928	3746	2794.31	7.33391	0.580846	11.6191	3.29549e-31	1.24761e-27	1h_vs_0h	ENSMUSG00000020641	Rsad2
ENSMUSG00000022906	35	71	67	53	270	299	318	277	2708	2494	3960	1587	1004.19	2.3605	0.259001	6.8552	7.12116e-12	4.49321e-09	1h_vs_0h	ENSMUSG00000022906	Parp9
ENSMUSG00000023341	4	4	11	4	883	1124	1287	1057	1211	1613	2161	982	847.652	7.56476	0.377084	18.5098	1.72013e-76	3.25603e-72	1h_vs_0h	ENSMUSG00000023341	Mx2
ENSMUSG00000025498	1	1	3	1	26	34	103	43	751	837	2219	411	351.952	5.13805	0.797568	5.70867	1.13862e-08	5.01232e-06	1h_vs_0h	ENSMUSG00000025498	Irf7
ENSMUSG00000026104	128	121	223	95	647	1029	732	1018	4885	5054	6184	3193	1928.55	2.55462	0.154924	12.7135	4.97836e-37	3.14118e-33	1h_vs_0h	ENSMUSG00000026104	Stat1
ENSMUSG00000026222	0	2	0	2	18	15	37	11	1196	514	1709	380	319.241	4.36443	0.916861	4.12214	3.75375e-05	0.0102978	1h_vs_0h	ENSMUSG00000026222	Sp100
ENSMUSG00000026535	18	45	61	44	151	224	397	283	1918	1133	3197	915	689.106	2.6462	0.415553	4.96013	7.04467e-07	0.000233945	1h_vs_0h	ENSMUSG00000026535	Ifi202b
ENSMUSG00000026896	11	15	15	13	179	165	277	182	2761	2065	5172	1339	995.108	3.90055	0.410256	8.08167	6.3887e-16	5.2579e-13	1h_vs_0h	ENSMUSG00000026896	Ifih1
ENSMUSG00000027580	134	131	331	107	814	944	1796	1017	3838	4276	10320	2532	2118.4	2.7755	0.408016	5.36866	7.93248e-08	2.97661e-05	1h_vs_0h	ENSMUSG00000027580	Helz2
ENSMUSG00000028037	3	0	3	0	212	166	231	154	5408	2904	6223	2031	1443.64	7.0407	0.719949	8.96688	3.05037e-19	2.88702e-16	1h_vs_0h	ENSMUSG00000028037	Ifi44
ENSMUSG00000028268	12	19	16	18	252	206	260	202	4932	3661	5725	2239	1458.95	3.83064	0.353162	9.19021	3.92089e-20	4.12325e-17	1h_vs_0h	ENSMUSG00000028268	Gbp3
ENSMUSG00000028270	66	109	127	93	595	411	1003	414	6249	3997	10648	2431	2137.09	2.68972	0.445206	4.72752	2.27277e-06	0.000682876	1h_vs_0h	ENSMUSG00000028270	Gbp2
ENSMUSG00000029417	0	0	0	0	13	5	14	2	244	105	110	62	47.678	5.62833	1.23469	4.0847	4.41335e-05	0.0119343	1h_vs_0h	ENSMUSG00000029417	Cxcl9
ENSMUSG00000029561	11	11	16	14	302	195	307	187	7832	5607	7853	3485	2163.12	4.3017	0.404002	9.19971	3.58931e-20	3.99659e-17	1h_vs_0h	ENSMUSG00000029561	Oasl2
ENSMUSG00000029605	8	2	13	1	103	157	175	164	455	518	781	290	217.096	4.62463	0.402162	10.0448	9.687e-24	1.4105e-20	1h_vs_0h	ENSMUSG00000029605	Oas1b
ENSMUSG00000030107	6	5	5	5	1298	1140	954	1103	7055	9380	9722	5118	2964.92	7.74152	0.389833	18.3579	2.85418e-75	2.70134e-71	1h_vs_0h	ENSMUSG00000030107	Usp18
ENSMUSG00000030157	25	21	12	16	116	85	52	93	157	84	132	70	72.8789	2.17687	0.426939	3.72856	0.000192577	0.048604	1h_vs_0h	ENSMUSG00000030157	Clec2d
ENSMUSG00000030921	1	0	3	0	19	19	33	21	2832	1557	3058	1074	719.124	4.54238	0.830865	4.76297	1.90769e-06	0.000591977	1h_vs_0h	ENSMUSG00000030921	Trim30a
ENSMUSG00000030966	76	58	117	51	935	777	1076	794	1221	1366	2330	743	784.572	3.61589	0.319999	9.47155	2.75725e-21	3.47947e-18	1h_vs_0h	ENSMUSG00000030966	Trim21
ENSMUSG00000031639	9	7	11	6	118	68	98	109	952	514	1221	416	294.537	3.59643	0.447975	6.72231	1.78866e-11	1.05805e-08	1h_vs_0h	ENSMUSG00000031639	Tlr3
ENSMUSG00000032690	0	0	0	0	11	8	3	8	662	369	549	236	155.317	5.30013	1.11876	4.21461	2.50208e-05	0.00717605	1h_vs_0h	ENSMUSG00000032690	Oas2
ENSMUSG00000033355	0	1	4	5	140	122	218	127	1174	856	1391	558	383.319	5.95216	0.590138	9.09476	9.47981e-20	9.44438e-17	1h_vs_0h	ENSMUSG00000033355	Rtp4
ENSMUSG00000034422	16	21	22	18	223	221	264	202	4022	3674	6767	2377	1468.61	3.56449	0.32214	9.24905	2.26507e-20	2.67972e-17	1h_vs_0h	ENSMUSG00000034422	Parp14
ENSMUSG00000034459	3	2	6	2	1444	766	2426	642	5617	4595	11504	3570	2545.35	8.79954	0.662383	12.4015	2.56455e-35	1.21361e-31	1h_vs_0h	ENSMUSG00000034459	Ifit1
ENSMUSG00000034855	5	5	7	1	428	189	1015	158	4815	2848	15433	1825	2123.71	6.7996	0.794327	7.82374	5.12786e-15	3.73328e-12	1h_vs_0h	ENSMUSG00000034855	Cxcl10
ENSMUSG00000035692	3	4	6	2	293	256	472	256	3938	4177	9554	2297	1714.11	6.46678	0.549718	10.6996	1.02195e-26	2.41807e-23	1h_vs_0h	ENSMUSG00000035692	Isg15
ENSMUSG00000037921	6	2	6	4	30	64	80	52	1141	852	1491	615	361.907	3.59938	0.469051	6.42656	1.30526e-10	7.26686e-08	1h_vs_0h	ENSMUSG00000037921	Ddx60
ENSMUSG00000038037	72	48	107	35	700	470	761	487	500	377	720	213	375.314	3.29068	0.397271	6.81067	9.71435e-12	5.9317e-09	1h_vs_0h	ENSMUSG00000038037	Socs1
ENSMUSG00000039853	2	4	2	3	23	30	11	12	262	294	408	153	98.6742	2.75385	0.560258	3.87115	0.000108321	0.0280878	1h_vs_0h	ENSMUSG00000039853	Trim14
ENSMUSG00000039997	3	2	3	1	54	48	140	42	1273	384	2328	330	373.744	5.04079	0.789101	5.64666	1.63596e-08	6.88157e-06	1h_vs_0h	ENSMUSG00000039997	Ifi203
ENSMUSG00000040033	469	582	682	487	1841	2243	1925	2358	7569	6867	12014	4098	3362.45	1.87602	0.203039	6.35849	2.03747e-10	1.10192e-07	1h_vs_0h	ENSMUSG00000040033	Stat2
ENSMUSG00000040253	40	26	43	23	503	322	535	314	4295	2939	5229	1839	1340.52	3.72014	0.396308	7.91088	2.55584e-15	1.98802e-12	1h_vs_0h	ENSMUSG00000040253	Gbp7
ENSMUSG00000040264	41	83	78	57	474	378	798	363	6628	4894	13235	3476	2496.16	3.01833	0.421754	5.76955	7.94833e-09	3.68461e-06	1h_vs_0h	ENSMUSG00000040264	Gbp2b
ENSMUSG00000040296	212	222	405	177	1229	1139	1357	1330	5433	4854	6544	3200	2172.65	2.34733	0.230003	7.6622	1.82769e-14	1.28134e-11	1h_vs_0h	ENSMUSG00000040296	Ddx58
ENSMUSG00000040483	20	43	57	28	183	197	263	156	2165	1732	3145	1077	747.815	2.48828	0.343902	5.53437	3.12356e-08	1.258e-05	1h_vs_0h	ENSMUSG00000040483	Xaf1
ENSMUSG00000041827	0	0	2	0	29	14	16	33	203	229	259	131	76.0238	5.49599	1.0308	4.76423	1.89572e-06	0.000591977	1h_vs_0h	ENSMUSG00000041827	Oasl1
ENSMUSG00000046879	55	62	106	46	1529	1074	2195	1077	4414	4303	8474	2816	2164.61	4.54248	0.380191	10.4092	2.25142e-25	3.87429e-22	1h_vs_0h	ENSMUSG00000046879	Irgm1
ENSMUSG00000047735	17	23	54	17	294	205	462	224	2847	1581	4073	1400	936.075	3.54289	0.455546	6.49306	8.41106e-11	4.82463e-08	1h_vs_0h	ENSMUSG00000047735	Samd9l
ENSMUSG00000048852	0	0	0	0	30	19	38	12	239	132	290	107	73.0051	7.12801	1.14236	5.72763	1.01846e-08	4.59009e-06	1h_vs_0h	ENSMUSG00000048852	Gm12185
ENSMUSG00000049502	62	75	75	58	804	647	782	729	3481	3060	4905	2070	1393.36	3.46025	0.267392	10.7529	5.74073e-27	1.55237e-23	1h_vs_0h	ENSMUSG00000049502	Dtx3l
ENSMUSG00000050370	37	43	43	35	215	180	372	170	40	59	108	34	112.085	2.59623	0.393471	5.11152	3.19585e-07	0.000109989	1h_vs_0h	ENSMUSG00000050370	Ch25h
ENSMUSG00000053113	369	560	840	473	1615	2234	2566	2244	376	637	1073	360	1073.87	1.95053	0.269209	5.07237	3.92893e-07	0.000132805	1h_vs_0h	ENSMUSG00000053113	Socs3
ENSMUSG00000054072	26	5	40	6	1804	732	2220	634	5934	4712	11578	3669	2621.33	6.31504	0.646933	8.85725	8.20137e-19	7.39256e-16	1h_vs_0h	ENSMUSG00000054072	Iigp1
ENSMUSG00000054203	0	0	0	0	7	19	37	34	118	141	440	116	73.417	6.94149	1.15414	5.50756	3.63834e-08	1.43479e-05	1h_vs_0h	ENSMUSG00000054203	Ifi205
ENSMUSG00000056144	6	7	7	5	28	27	32	29	50	53	78	26	28.4728	2.18648	0.400642	3.99728	6.40732e-05	0.0170823	1h_vs_0h	ENSMUSG00000056144	Trim34a
ENSMUSG00000060519	39	58	86	48	499	465	744	439	4947	4078	10377	2198	1935.61	3.2707	0.389031	6.90356	5.07155e-12	3.31032e-09	1h_vs_0h	ENSMUSG00000060519	Tor3a
ENSMUSG00000062488	0	0	2	0	273	105	307	101	1721	1637	4134	1122	770.413	8.76624	1.13863	7.18519	6.71147e-13	4.5372e-10	1h_vs_0h	ENSMUSG00000062488	Ifit3b
ENSMUSG00000063388	0	2	5	2	177	201	421	191	96	133	508	125	152.57	6.85598	0.73448	8.53798	1.36586e-17	1.17519e-14	1h_vs_0h	ENSMUSG00000063388	NA
ENSMUSG00000068606	0	0	0	0	110	96	155	85	113	125	277	102	88.5257	9.25847	1.09686	7.90752	2.62562e-15	1.98802e-12	1h_vs_0h	ENSMUSG00000068606	Gm4841
ENSMUSG00000069874	27	16	47	15	2094	1129	2280	1123	2579	1891	5171	1154	1458.7	6.10642	0.494641	11.1625	6.22391e-29	1.96354e-25	1h_vs_0h	ENSMUSG00000069874	Irgm2
ENSMUSG00000070327	999	758	2414	642	2956	3963	5444	3908	40393	65596	77775	40260	20252.1	1.82116	0.327642	3.7729	0.000161362	0.0412759	1h_vs_0h	ENSMUSG00000070327	Rnf213
ENSMUSG00000073489	7	6	20	7	45	103	136	94	1134	588	1825	410	356.395	3.24004	0.4962	5.35075	8.75903e-08	3.12829e-05	1h_vs_0h	ENSMUSG00000073489	Ifi204
ENSMUSG00000073490	0	2	2	0	10	31	37	23	74	80	154	50	37.4782	4.62173	0.829511	4.8664	1.13648e-06	0.000370903	1h_vs_0h	ENSMUSG00000073490	Ifi207
ENSMUSG00000073555	0	0	0	0	62	31	68	12	541	229	610	214	149.736	7.9887	1.2041	6.14873	7.81057e-10	3.79093e-07	1h_vs_0h	ENSMUSG00000073555	Gm4951
ENSMUSG00000074896	1	1	3	2	623	229	684	225	4104	4027	10516	2451	1856.83	8.11729	0.779518	9.66275	4.34072e-22	5.86897e-19	1h_vs_0h	ENSMUSG00000074896	Ifit3
ENSMUSG00000078853	7	10	18	9	931	462	910	459	2632	2386	6669	1447	1300.68	6.09841	0.516703	10.6704	1.40078e-26	2.94615e-23	1h_vs_0h	ENSMUSG00000078853	Igtp
ENSMUSG00000078920	0	5	3	0	93	26	121	28	1037	573	1517	352	309.399	5.27975	0.861714	5.44816	5.08946e-08	1.96609e-05	1h_vs_0h	ENSMUSG00000078920	Ifi47
ENSMUSG00000078921	0	0	0	0	5	10	9	5	228	137	348	143	74.4886	5.23485	1.11479	4.17105	3.032e-05	0.00856607	1h_vs_0h	ENSMUSG00000078921	Tgtp2
ENSMUSG00000079363	1	4	1	2	67	31	76	35	1019	463	1750	323	307.61	4.77917	0.757292	5.53838	3.05283e-08	1.25624e-05	1h_vs_0h	ENSMUSG00000079363	Gbp4
ENSMUSG00000082292	4	5	2	4	52	30	85	20	910	384	1475	235	260.836	3.69274	0.710455	4.3743	1.21822e-05	0.00354764	1h_vs_0h	ENSMUSG00000082292	NA
ENSMUSG00000085977	0	0	0	0	10	3	8	6	123	46	85	29	26.2225	5.22091	1.18938	3.89777	9.70844e-05	0.0255238	1h_vs_0h	ENSMUSG00000085977	NA
ENSMUSG00000090942	9	3	8	6	446	254	533	231	840	927	1955	792	504.741	5.87749	0.526762	10.0472	9.45075e-24	1.4105e-20	1h_vs_0h	ENSMUSG00000090942	F830016B08Rik
ENSMUSG00000097194	1	2	7	1	30	24	46	20	33	18	69	12	21.6717	3.56932	0.717956	4.15669	3.22889e-05	0.00898818	1h_vs_0h	ENSMUSG00000097194	NA
ENSMUSG00000102964	10	16	12	14	24	82	58	85	30	48	56	34	37.1151	2.12995	0.329359	4.69078	2.72167e-06	0.000804978	1h_vs_0h	ENSMUSG00000102964	NA
ENSMUSG00000104713	1	1	0	1	63	31	24	28	411	303	530	180	130.639	5.65722	0.947105	5.3555	8.53197e-08	3.1058e-05	1h_vs_0h	ENSMUSG00000104713	Gbp6
ENSMUSG00000106734	6	1	6	1	46	43	41	53	327	203	336	193	106.686	3.68618	0.490924	6.31702	2.66653e-10	1.36418e-07	1h_vs_0h	ENSMUSG00000106734	NA
ENSMUSG00000107017	0	0	0	0	20	20	8	10	23	42	26	26	14.7763	6.27568	1.10976	5.12786	2.93053e-07	0.000102726	1h_vs_0h	ENSMUSG00000107017	NA
ENSMUSG00000107215	2	2	0	0	33	36	40	32	184	113	219	86	62.3537	5.11732	0.795781	5.69544	1.23055e-08	5.29387e-06	1h_vs_0h	ENSMUSG00000107215	NA
ENSMUSG00000108068	0	5	0	2	36	18	23	26	48	38	57	25	23.4007	3.89583	0.693296	4.7755	1.7926e-06	0.000575121	1h_vs_0h	ENSMUSG00000108068	NA
ENSMUSG00000116639	0	0	0	0	11	11	11	9	9	13	14	14	7.86195	5.79147	1.09984	4.73385	2.20304e-06	0.000672603	1h_vs_0h	ENSMUSG00000116639	NA
ENSMUSG00000000275	386	384	925	303	1650	1235	2722	1262	3347	3180	7469	1826	2018.67	3.02892	0.427391	5.71823	1.07639e-08	1.75557e-06	6h_vs_0h	ENSMUSG00000000275	Trim25
ENSMUSG00000000386	0	0	1	0	37	86	73	67	589	449	1586	253	249.266	11.1481	1.11562	9.46832	2.84367e-21	9.33698e-19	6h_vs_0h	ENSMUSG00000000386	Mx1
ENSMUSG00000000409	35	56	41	42	36	64	32	59	118	129	131	92	69.2082	1.46362	0.205407	4.27749	1.89014e-05	0.00235833	6h_vs_0h	ENSMUSG00000000409	Lck
ENSMUSG00000000708	201	235	320	186	227	389	336	415	651	631	997	432	408.983	1.55681	0.164857	5.89486	3.75009e-09	6.36597e-07	6h_vs_0h	ENSMUSG00000000708	Kat2b
ENSMUSG00000001123	125	83	255	59	253	124	339	123	3343	1749	4403	984	971.421	4.3949	0.536671	7.09914	1.25539e-12	2.44743e-10	6h_vs_0h	ENSMUSG00000001123	Lgals9
ENSMUSG00000001166	8	13	12	7	19	44	41	33	131	163	264	88	66.5795	4.01173	0.348397	9.8357	7.9015e-23	2.73853e-20	6h_vs_0h	ENSMUSG00000001166	Oas1c
ENSMUSG00000001642	100	104	147	84	129	180	182	208	367	284	503	182	201.493	1.64143	0.223634	4.72391	2.31351e-06	0.000312061	6h_vs_0h	ENSMUSG00000001642	Akr1b3
ENSMUSG00000001750	271	296	736	233	450	451	826	468	1351	1522	4034	752	909.261	2.34519	0.434385	4.05213	5.07529e-05	0.005974	6h_vs_0h	ENSMUSG00000001750	Tcirg1
ENSMUSG00000002227	664	635	1214	490	876	943	1105	1025	2827	2555	4330	1358	1466.07	1.91569	0.266116	5.00043	5.72034e-07	8.19941e-05	6h_vs_0h	ENSMUSG00000002227	Mov10
ENSMUSG00000002307	402	477	627	382	859	924	1175	1030	1627	1578	3630	887	1101.78	2.01707	0.296719	4.82634	1.39064e-06	0.00019067	6h_vs_0h	ENSMUSG00000002307	Daxx
ENSMUSG00000002325	160	204	312	134	1279	1392	1312	1483	1817	1801	2691	1153	1126.08	3.25641	0.205547	12.9966	1.27928e-38	7.9808e-36	6h_vs_0h	ENSMUSG00000002325	Irf9
ENSMUSG00000004952	38	53	47	32	29	65	38	61	72	161	219	75	71.0159	1.60449	0.284533	3.58304	0.000339614	0.0360627	6h_vs_0h	ENSMUSG00000004952	Rasa4
ENSMUSG00000006611	2	2	2	1	5	5	4	2	21	11	33	6	7.68502	3.33653	0.74981	3.66963	0.000242901	0.0268201	6h_vs_0h	ENSMUSG00000006611	Hfe
ENSMUSG00000006930	692	839	696	676	825	1231	517	1303	4229	3869	6792	1903	1907.45	2.48631	0.282326	6.73443	1.64577e-11	3.04211e-09	6h_vs_0h	ENSMUSG00000006930	Hap1
ENSMUSG00000010358	14	23	86	22	84	101	219	107	1331	1221	3054	581	546.787	5.49635	0.522388	9.40174	5.367e-21	1.73933e-18	6h_vs_0h	ENSMUSG00000010358	Ifi35
ENSMUSG00000012519	2	5	7	2	11	16	13	10	187	120	322	67	61.6393	5.46151	0.539334	9.04172	1.5422e-19	4.81052e-17	6h_vs_0h	ENSMUSG00000012519	Mlkl
ENSMUSG00000016206	7	7	28	5	8	14	33	23	74	56	228	42	41.7212	3.16078	0.600744	4.28764	1.8058e-05	0.00226442	6h_vs_0h	ENSMUSG00000016206	H2-M3
ENSMUSG00000016496	17	18	15	20	157	124	264	123	223	241	630	166	164.656	4.1071	0.461918	7.62495	2.44135e-14	5.69359e-12	6h_vs_0h	ENSMUSG00000016496	Cd274
ENSMUSG00000017830	9	21	14	16	26	34	44	35	518	438	841	276	186.652	5.10335	0.343925	13.1376	2.00411e-39	1.38918e-36	6h_vs_0h	ENSMUSG00000017830	Dhx58
ENSMUSG00000019866	7	13	29	14	12	18	18	22	81	69	233	43	44.4281	2.77262	0.461161	4.74371	2.0984e-06	0.000284585	6h_vs_0h	ENSMUSG00000019866	Crybg1
ENSMUSG00000020143	2	3	6	2	2	3	2	4	56	26	37	8	12.3195	3.33532	0.640541	4.29375	1.75683e-05	0.00221413	6h_vs_0h	ENSMUSG00000020143	Dock2
ENSMUSG00000020464	289	378	432	309	550	937	734	905	2479	2223	3647	1600	1190.9	2.84482	0.16525	13.6752	1.42905e-42	1.11439e-39	6h_vs_0h	ENSMUSG00000020464	Pnpt1
ENSMUSG00000020572	489	676	592	547	717	1019	771	1108	2031	1865	2246	1143	1086.02	1.66892	0.15338	7.06688	1.58455e-12	3.06518e-10	6h_vs_0h	ENSMUSG00000020572	Nampt
ENSMUSG00000020638	44	84	39	62	543	421	491	460	3194	2359	5587	1448	1205.27	5.72671	0.391883	13.1205	2.512e-39	1.69417e-36	6h_vs_0h	ENSMUSG00000020638	Cmpk2
ENSMUSG00000020641	3	2	7	2	494	541	700	457	5468	5500	17928	3746	2794.31	11.1834	0.580096	18.2701	1.43226e-74	3.57407e-71	6h_vs_0h	ENSMUSG00000020641	Rsad2
ENSMUSG00000020676	0	6	2	2	7	8	2	2	29	22	29	18	10.7629	3.35521	0.656026	4.22271	2.41379e-05	0.00292594	6h_vs_0h	ENSMUSG00000020676	Ccl11
ENSMUSG00000020790	1979	2258	2787	1914	1992	2923	2323	3242	4620	4763	5740	2911	3062.8	1.03501	0.0957769	4.69858	2.61983e-06	0.0003496	6h_vs_0h	ENSMUSG00000020790	Ankfy1
ENSMUSG00000020953	21	34	18	18	12	29	19	23	676	147	319	100	120.071	3.80233	0.529586	6.07517	1.23857e-09	2.17656e-07	6h_vs_0h	ENSMUSG00000020953	Coch
ENSMUSG00000021583	83	110	132	78	88	137	145	172	740	571	767	386	282.621	2.65892	0.196632	10.5472	5.23323e-26	2.00908e-23	6h_vs_0h	ENSMUSG00000021583	Erap1
ENSMUSG00000021809	56	60	81	54	51	113	74	101	148	158	239	86	98.3932	1.33513	0.20647	3.63314	0.000279995	0.0302467	6h_vs_0h	ENSMUSG00000021809	Nudt13
ENSMUSG00000022014	0	1	1	0	0	2	2	3	28	21	31	20	9.23575	5.69675	1.04533	4.8901	1.00786e-06	0.000140504	6h_vs_0h	ENSMUSG00000022014	Epsti1
ENSMUSG00000022216	534	569	808	489	573	720	685	760	1751	1492	2642	845	967.177	1.49421	0.218199	4.16687	3.08811e-05	0.00369843	6h_vs_0h	ENSMUSG00000022216	Psme1
ENSMUSG00000022514	107	239	186	182	140	308	185	358	437	498	744	280	294.479	1.44885	0.247038	3.49682	0.000470837	0.0491602	6h_vs_0h	ENSMUSG00000022514	Il1rap
ENSMUSG00000022548	3	11	9	7	15	17	6	24	583	361	299	230	133.592	5.69308	0.441609	11.567	6.05822e-31	2.85239e-28	6h_vs_0h	ENSMUSG00000022548	Apod
ENSMUSG00000022587	530	489	871	372	544	572	635	628	5734	3350	6341	1903	1807.3	2.97716	0.306056	7.81609	5.44902e-15	1.28278e-12	6h_vs_0h	ENSMUSG00000022587	Ly6e
ENSMUSG00000022867	525	621	815	510	645	908	809	993	1852	1623	3301	1059	1110.29	1.67291	0.217606	4.99942	5.75017e-07	8.19941e-05	6h_vs_0h	ENSMUSG00000022867	Usp25
ENSMUSG00000022906	35	71	67	53	270	299	318	277	2708	2494	3960	1587	1004.19	5.59071	0.255921	19.5596	3.4185e-85	1.21865e-81	6h_vs_0h	ENSMUSG00000022906	Parp9
ENSMUSG00000023186	493	574	910	491	631	849	1120	976	2086	1867	3460	1211	1196.74	1.83459	0.247365	5.0516	4.38116e-07	6.35625e-05	6h_vs_0h	ENSMUSG00000023186	Vwa5a
ENSMUSG00000023206	0	2	2	3	1	6	4	3	13	15	34	6	7.01492	3.24416	0.749105	3.54978	0.000385559	0.0407679	6h_vs_0h	ENSMUSG00000023206	Il15ra
ENSMUSG00000023224	67	93	102	77	110	128	138	121	490	281	815	147	208.205	2.32911	0.372525	4.68187	2.84276e-06	0.000373359	6h_vs_0h	ENSMUSG00000023224	Serping1
ENSMUSG00000023341	4	4	11	4	883	1124	1287	1057	1211	1613	2161	982	847.652	8.04847	0.376933	19.8005	2.94806e-87	1.2261e-83	6h_vs_0h	ENSMUSG00000023341	Mx2
ENSMUSG00000024019	115	123	135	108	123	252	142	277	273	386	317	214	199.809	1.32204	0.145992	5.04849	4.45327e-07	6.42352e-05	6h_vs_0h	ENSMUSG00000024019	Cmtr1
ENSMUSG00000024066	14	3	16	5	6	20	10	10	239	79	435	54	71.4604	4.39032	0.634118	6.00096	1.96156e-09	3.39922e-07	6h_vs_0h	ENSMUSG00000024066	Xdh
ENSMUSG00000024079	410	443	693	331	1128	1167	1295	1285	5661	4596	7467	3148	2288.71	3.52378	0.224519	13.0892	3.79492e-39	2.49206e-36	6h_vs_0h	ENSMUSG00000024079	Eif2ak2
ENSMUSG00000024308	502	548	1116	453	639	846	1096	863	5311	4530	8176	2419	2154.72	3.00711	0.291881	8.29826	1.05647e-16	2.74615e-14	6h_vs_0h	ENSMUSG00000024308	Tapbp
ENSMUSG00000024338	3	8	12	8	27	30	58	40	648	607	1437	281	252.506	6.56856	0.47893	12.4936	8.09081e-36	4.6953e-33	6h_vs_0h	ENSMUSG00000024338	Psmb8
ENSMUSG00000024339	47	69	117	57	86	85	112	80	944	844	1983	383	385.064	3.84425	0.371374	8.77617	1.69132e-18	4.96533e-16	6h_vs_0h	ENSMUSG00000024339	Tap2
ENSMUSG00000024371	3	10	9	6	6	6	8	6	30	32	63	15	15.6298	2.32055	0.455893	3.80692	0.000140709	0.0156752	6h_vs_0h	ENSMUSG00000024371	C2
ENSMUSG00000024421	6	9	19	9	8	28	12	27	54	54	32	31	23.4874	2.07083	0.382669	3.88281	0.000103254	0.0116589	6h_vs_0h	ENSMUSG00000024421	Lama3
ENSMUSG00000024457	629	772	1166	627	872	1430	1373	1536	1642	1939	3245	1086	1312.5	1.32385	0.205306	3.59878	0.000319712	0.0340945	6h_vs_0h	ENSMUSG00000024457	Trim26
ENSMUSG00000024678	0	0	1	0	2	1	4	0	74	25	84	18	17.3134	7.3659	1.21227	5.59356	2.22456e-08	3.53578e-06	6h_vs_0h	ENSMUSG00000024678	Ms4a4d
ENSMUSG00000025324	127	181	231	154	105	219	205	241	714	673	1157	390	356.637	2.09304	0.226377	6.66163	2.70805e-11	4.96888e-09	6h_vs_0h	ENSMUSG00000025324	Atp10a
ENSMUSG00000025492	303	277	711	226	688	556	1077	563	4527	3243	7229	1843	1735.19	3.53051	0.410644	7.17291	7.34205e-13	1.47753e-10	6h_vs_0h	ENSMUSG00000025492	Ifitm3
ENSMUSG00000025498	1	1	3	1	26	34	103	43	751	837	2219	411	351.952	9.4349	0.79163	11.1793	5.14701e-29	2.25331e-26	6h_vs_0h	ENSMUSG00000025498	Irf7
ENSMUSG00000026088	67	74	120	74	126	187	194	214	383	296	508	270	207.976	2.18059	0.21639	7.3737	1.65957e-13	3.69758e-11	6h_vs_0h	ENSMUSG00000026088	Mitd1
ENSMUSG00000026104	128	121	223	95	647	1029	732	1018	4885	5054	6184	3193	1928.55	5.14304	0.153236	29.7452	2.00136e-194	4.99419e-190	6h_vs_0h	ENSMUSG00000026104	Stat1
ENSMUSG00000026222	0	2	0	2	18	15	37	11	1196	514	1709	380	319.241	9.86537	0.903685	10.2695	9.67317e-25	3.60275e-22	6h_vs_0h	ENSMUSG00000026222	Sp100
ENSMUSG00000026466	503	545	809	446	680	820	956	881	2676	2157	4827	1437	1365.88	2.28219	0.267584	6.34263	2.25874e-10	4.08439e-08	6h_vs_0h	ENSMUSG00000026466	Tor1aip1
ENSMUSG00000026535	18	45	61	44	151	224	397	283	1918	1133	3197	915	689.106	5.44689	0.413504	11.7578	6.43863e-32	3.0898e-29	6h_vs_0h	ENSMUSG00000026535	Ifi202b
ENSMUSG00000026536	1	6	4	4	11	10	16	18	153	91	310	54	54.5153	5.31997	0.585814	8.08272	6.33393e-16	1.56492e-13	6h_vs_0h	ENSMUSG00000026536	Ifi211
ENSMUSG00000026896	11	15	15	13	179	165	277	182	2761	2065	5172	1339	995.108	7.69548	0.407372	17.4545	3.18007e-68	6.61295e-65	6h_vs_0h	ENSMUSG00000026896	Ifih1
ENSMUSG00000026946	18	9	23	7	17	28	24	23	210	139	301	94	73.3429	3.734	0.379768	8.29191	1.11446e-16	2.86704e-14	6h_vs_0h	ENSMUSG00000026946	Nmi
ENSMUSG00000027078	96	44	272	45	176	95	328	95	1884	1257	2785	585	622.485	3.9291	0.607285	5.50664	3.65745e-08	5.77645e-06	6h_vs_0h	ENSMUSG00000027078	Ube2l6
ENSMUSG00000027360	3	3	3	2	1	1	5	2	32	17	32	12	9.45958	3.10827	0.614406	4.10685	4.01088e-05	0.00474348	6h_vs_0h	ENSMUSG00000027360	Hdc
ENSMUSG00000027514	1	0	1	1	10	10	11	10	479	314	743	202	146.122	9.17623	0.903613	9.50764	1.95041e-21	6.48942e-19	6h_vs_0h	ENSMUSG00000027514	Zbp1
ENSMUSG00000027580	134	131	331	107	814	944	1796	1017	3838	4276	10320	2532	2118.4	4.93834	0.407594	10.6806	1.25476e-26	5.05022e-24	6h_vs_0h	ENSMUSG00000027580	Helz2
ENSMUSG00000027639	536	376	749	335	569	555	728	597	2676	1400	4207	928	1115.47	2.21491	0.382791	4.25796	2.06303e-05	0.00256124	6h_vs_0h	ENSMUSG00000027639	Samhd1
ENSMUSG00000027669	593	531	709	413	593	662	525	738	2182	1596	2876	925	1010.86	1.75697	0.248285	4.72027	2.35531e-06	0.000315991	6h_vs_0h	ENSMUSG00000027669	Gnb4
ENSMUSG00000027951	940	1312	1422	1078	1534	2286	1591	2493	4774	5691	7546	3161	2751.66	2.15751	0.132144	11.9	1.18309e-32	5.90455e-30	6h_vs_0h	ENSMUSG00000027951	Adar
ENSMUSG00000028037	3	0	3	0	212	166	231	154	5408	2904	6223	2031	1443.64	11.4636	0.7182	15.1471	7.92427e-52	8.59749e-49	6h_vs_0h	ENSMUSG00000028037	Ifi44
ENSMUSG00000028268	12	19	16	18	252	206	260	202	4932	3661	5725	2239	1458.95	7.9947	0.350202	21.1584	2.31146e-99	1.442e-95	6h_vs_0h	ENSMUSG00000028268	Gbp3
ENSMUSG00000028270	66	109	127	93	595	411	1003	414	6249	3997	10648	2431	2137.09	5.87949	0.444393	11.914	1.00083e-32	5.0969e-30	6h_vs_0h	ENSMUSG00000028270	Gbp2
ENSMUSG00000028995	1040	1314	1367	1085	907	1390	1056	1680	3540	3016	4567	1842	1864.61	1.43621	0.167488	5.08224	3.73005e-07	5.54045e-05	6h_vs_0h	ENSMUSG00000028995	Fam126a
ENSMUSG00000029298	56	19	68	20	249	125	271	110	4386	2720	5477	1815	1273.94	6.49976	0.519092	11.3944	4.45685e-30	2.02211e-27	6h_vs_0h	ENSMUSG00000029298	Gbp9
ENSMUSG00000029322	6	10	16	8	15	12	16	10	210	40	211	13	46.1517	3.59195	0.693544	4.33563	1.45344e-05	0.00185995	6h_vs_0h	ENSMUSG00000029322	Plac8
ENSMUSG00000029417	0	0	0	0	13	5	14	2	244	105	110	62	47.678	9.50905	1.21357	7.35355	1.93013e-13	4.22495e-11	6h_vs_0h	ENSMUSG00000029417	Cxcl9
ENSMUSG00000029561	11	11	16	14	302	195	307	187	7832	5607	7853	3485	2163.12	8.91521	0.401618	20.7416	1.45923e-95	7.28272e-92	6h_vs_0h	ENSMUSG00000029561	Oasl2
ENSMUSG00000029605	8	2	13	1	103	157	175	164	455	518	781	290	217.096	6.44065	0.39907	14.6732	9.56642e-49	8.52573e-46	6h_vs_0h	ENSMUSG00000029605	Oas1b
ENSMUSG00000029798	9	14	11	10	10	35	27	31	304	211	524	173	111.836	4.78882	0.385949	10.8922	1.25629e-27	5.31347e-25	6h_vs_0h	ENSMUSG00000029798	Herc6
ENSMUSG00000029826	332	326	507	264	746	733	864	797	5921	5436	8875	3405	2327.19	4.07365	0.234089	14.9031	3.14715e-50	3.14136e-47	6h_vs_0h	ENSMUSG00000029826	Zc3hav1
ENSMUSG00000030046	0	0	0	0	6	0	2	1	36	6	18	6	6.56232	6.53583	1.43083	4.15901	3.19635e-05	0.00379818	6h_vs_0h	ENSMUSG00000030046	Bmp10
ENSMUSG00000030107	6	5	5	5	1298	1140	954	1103	7055	9380	9722	5118	2964.92	10.5467	0.389334	25.5866	2.14898e-144	2.68128e-140	6h_vs_0h	ENSMUSG00000030107	Usp18
ENSMUSG00000030157	25	21	12	16	116	85	52	93	157	84	132	70	72.8789	2.58147	0.4256	4.69095	2.71933e-06	0.000359038	6h_vs_0h	ENSMUSG00000030157	Clec2d
ENSMUSG00000030921	1	0	3	0	19	19	33	21	2832	1557	3058	1074	719.124	11.1077	0.817417	12.8731	6.37876e-38	3.88233e-35	6h_vs_0h	ENSMUSG00000030921	Trim30a
ENSMUSG00000030966	76	58	117	51	935	777	1076	794	1221	1366	2330	743	784.572	4.23858	0.319728	11.4272	3.05961e-30	1.41388e-27	6h_vs_0h	ENSMUSG00000030966	Trim21
ENSMUSG00000031639	9	7	11	6	118	68	98	109	952	514	1221	416	294.537	6.58104	0.442939	13.5369	9.46378e-42	6.94586e-39	6h_vs_0h	ENSMUSG00000031639	Tlr3
ENSMUSG00000031897	119	104	188	92	156	182	218	171	1752	1133	2952	550	614.66	3.65955	0.368438	8.34482	7.13207e-17	1.9137e-14	6h_vs_0h	ENSMUSG00000031897	Psmb10
ENSMUSG00000032265	276	247	269	221	535	633	645	640	904	736	1069	517	554.11	1.67649	0.212907	5.12663	2.94978e-07	4.40772e-05	6h_vs_0h	ENSMUSG00000032265	Tent5a
ENSMUSG00000032372	14	24	79	20	35	39	113	59	261	129	599	78	115.507	3.03909	0.608085	4.03577	5.44243e-05	0.00631676	6h_vs_0h	ENSMUSG00000032372	Plscr2
ENSMUSG00000032596	37	26	118	25	104	122	284	126	809	756	1783	373	366.618	4.24626	0.512867	7.1388	9.41459e-13	1.86454e-10	6h_vs_0h	ENSMUSG00000032596	Uba7
ENSMUSG00000032661	1	2	1	0	2	6	0	2	90	72	179	32	30.8644	6.51741	0.877982	6.75687	1.41009e-11	2.62592e-09	6h_vs_0h	ENSMUSG00000032661	Oas3
ENSMUSG00000032690	0	0	0	0	11	8	3	8	662	369	549	236	155.317	11.2876	1.088	9.83696	7.80344e-23	2.73853e-20	6h_vs_0h	ENSMUSG00000032690	Oas2
ENSMUSG00000033355	0	1	4	5	140	122	218	127	1174	856	1391	558	383.319	8.66126	0.587758	13.7408	5.78441e-43	4.65627e-40	6h_vs_0h	ENSMUSG00000033355	Rtp4
ENSMUSG00000033487	1547	1742	1965	1426	1437	2229	1824	2466	3054	3523	4416	2396	2296.79	1.02382	0.0991252	4.42695	9.55733e-06	0.00123572	6h_vs_0h	ENSMUSG00000033487	Fndc3a
ENSMUSG00000033538	0	0	1	0	3	8	18	2	9	5	42	9	7.94065	5.71057	1.33256	3.84641	0.000119862	0.0134732	6h_vs_0h	ENSMUSG00000033538	Casp4
ENSMUSG00000033576	3	5	12	2	10	26	25	32	61	102	158	70	40.9839	4.2053	0.439364	8.23985	1.72425e-16	4.34615e-14	6h_vs_0h	ENSMUSG00000033576	Apol6
ENSMUSG00000033880	49	42	152	42	156	125	303	136	2553	1742	4872	849	885.839	5.19233	0.507663	9.07556	1.13093e-19	3.57231e-17	6h_vs_0h	ENSMUSG00000033880	Lgals3bp
ENSMUSG00000034422	16	21	22	18	223	221	264	202	4022	3674	6767	2377	1468.61	7.77237	0.318813	22.5442	1.53159e-112	1.27398e-108	6h_vs_0h	ENSMUSG00000034422	Parp14
ENSMUSG00000034438	0	2	7	3	3	2	5	4	42	14	53	8	11.5915	3.34883	0.753497	3.66801	0.000244447	0.026872	6h_vs_0h	ENSMUSG00000034438	Gbp8
ENSMUSG00000034459	3	2	6	2	1444	766	2426	642	5617	4595	11504	3570	2545.35	10.9572	0.662173	15.664	2.66762e-55	3.6982e-52	6h_vs_0h	ENSMUSG00000034459	Ifit1
ENSMUSG00000034842	0	0	0	0	1	2	0	3	20	8	10	2	3.74327	5.76667	1.28958	4.0181	5.86687e-05	0.00674663	6h_vs_0h	ENSMUSG00000034842	Art3
ENSMUSG00000034855	5	5	7	1	428	189	1015	158	4815	2848	15433	1825	2123.71	10.4141	0.793716	12.3837	3.2024e-35	1.77584e-32	6h_vs_0h	ENSMUSG00000034855	Cxcl10
ENSMUSG00000034947	14	28	37	24	24	68	60	68	238	281	433	166	116.916	3.46156	0.27968	10.2852	8.21711e-25	3.10681e-22	6h_vs_0h	ENSMUSG00000034947	Tmem106a
ENSMUSG00000035208	0	2	1	3	21	8	6	9	179	75	134	59	42.4209	6.25092	0.791116	7.16194	7.95443e-13	1.58796e-10	6h_vs_0h	ENSMUSG00000035208	Slfn8
ENSMUSG00000035505	151	185	251	157	237	275	385	290	600	492	1054	294	356.516	1.71633	0.295878	3.82363	0.000131501	0.0147152	6h_vs_0h	ENSMUSG00000035505	Cox18
ENSMUSG00000035517	211	328	394	236	394	595	460	654	2134	2495	3355	1371	1028.73	3.02196	0.145787	16.7159	1.00328e-62	1.92584e-59	6h_vs_0h	ENSMUSG00000035517	Tdrd7
ENSMUSG00000035692	3	4	6	2	293	256	472	256	3938	4177	9554	2297	1714.11	10.3717	0.548375	17.8467	3.06659e-71	6.9567e-68	6h_vs_0h	ENSMUSG00000035692	Isg15
ENSMUSG00000035929	31	55	56	39	77	71	99	96	1358	675	2352	332	421.007	4.68119	0.439003	9.33067	1.05202e-20	3.36566e-18	6h_vs_0h	ENSMUSG00000035929	H2-Q4
ENSMUSG00000036912	0	3	2	4	2	4	2	0	24	24	51	14	10.5879	3.63096	0.676094	4.50523	6.63006e-06	0.000866212	6h_vs_0h	ENSMUSG00000036912	Piwil4
ENSMUSG00000036986	697	807	1330	665	984	1275	1292	1435	3815	3657	6790	2121	2017.24	2.25058	0.228862	7.27766	3.39656e-13	7.1225e-11	6h_vs_0h	ENSMUSG00000036986	Pml
ENSMUSG00000037321	338	435	1194	368	786	889	1734	952	4262	3827	10693	1892	2184.73	3.19526	0.45795	5.69987	1.19896e-08	1.94279e-06	6h_vs_0h	ENSMUSG00000037321	Tap1
ENSMUSG00000037826	105	187	137	142	173	272	150	312	363	394	600	250	250.399	1.48625	0.222699	4.04694	5.18915e-05	0.00607934	6h_vs_0h	ENSMUSG00000037826	Ppm1k
ENSMUSG00000037860	4	16	18	15	9	26	24	28	77	45	168	38	37.6094	2.63975	0.486613	4.22256	2.41542e-05	0.00292594	6h_vs_0h	ENSMUSG00000037860	Aim2
ENSMUSG00000037921	6	2	6	4	30	64	80	52	1141	852	1491	615	361.907	7.85109	0.459494	15.8132	2.52178e-56	3.93302e-53	6h_vs_0h	ENSMUSG00000037921	Ddx60
ENSMUSG00000038037	72	48	107	35	700	470	761	487	500	377	720	213	375.314	2.81943	0.397772	5.61735	1.93909e-08	3.1018e-06	6h_vs_0h	ENSMUSG00000038037	Socs1
ENSMUSG00000038213	39	43	62	34	33	39	47	50	196	166	335	85	91.3817	2.13476	0.298147	5.19796	2.01492e-07	3.0473e-05	6h_vs_0h	ENSMUSG00000038213	Tapbpl
ENSMUSG00000038507	228	185	285	144	322	359	405	442	5164	4811	6726	2765	1803.03	4.54816	0.214086	18.512	1.65315e-76	4.58364e-73	6h_vs_0h	ENSMUSG00000038507	Parp12
ENSMUSG00000038774	744	940	1083	765	813	1378	1085	1553	3296	3298	4204	2299	1766.48	1.92453	0.106537	12.5734	2.9586e-36	1.75783e-33	6h_vs_0h	ENSMUSG00000038774	Ascc3
ENSMUSG00000038866	323	403	589	323	470	527	616	540	1171	923	1662	614	669.816	1.45264	0.241063	3.59922	0.000319168	0.0340945	6h_vs_0h	ENSMUSG00000038866	Zcchc2
ENSMUSG00000038884	38	46	96	23	104	100	103	83	381	389	594	210	177.075	3.02564	0.331539	7.36155	1.81785e-13	4.01438e-11	6h_vs_0h	ENSMUSG00000038884	A230050P20Rik
ENSMUSG00000039146	0	1	0	0	0	1	0	1	346	88	171	73	58.523	9.17591	1.17694	7.29937	2.89124e-13	6.11425e-11	6h_vs_0h	ENSMUSG00000039146	Ifi44l
ENSMUSG00000039236	7	13	12	8	21	41	47	40	323	181	778	84	122.781	5.04771	0.534682	8.34647	7.03347e-17	1.90775e-14	6h_vs_0h	ENSMUSG00000039236	Isg20
ENSMUSG00000039304	0	0	0	0	4	5	2	1	66	34	87	22	18.2043	8.1386	1.1388	6.63297	3.28999e-11	5.99258e-09	6h_vs_0h	ENSMUSG00000039304	Tnfsf10
ENSMUSG00000039501	526	573	757	481	1423	1556	1526	1708	2979	2841	6485	1710	1829.37	2.56901	0.270525	7.3339	2.23547e-13	4.76786e-11	6h_vs_0h	ENSMUSG00000039501	Znfx1
ENSMUSG00000039616	14	16	41	10	11	23	34	22	67	86	243	49	48.7299	2.49217	0.487734	3.91026	9.21973e-05	0.0105054	6h_vs_0h	ENSMUSG00000039616	Mocos
ENSMUSG00000039699	1	0	0	0	3	2	1	4	9	8	26	2	4.36876	5.13369	1.2364	3.67897	0.000234179	0.025972	6h_vs_0h	ENSMUSG00000039699	Batf2
ENSMUSG00000039853	2	4	2	3	23	30	11	12	262	294	408	153	98.6742	6.65691	0.537141	11.3041	1.25212e-29	5.57952e-27	6h_vs_0h	ENSMUSG00000039853	Trim14
ENSMUSG00000039997	3	2	3	1	54	48	140	42	1273	384	2328	330	373.744	8.88758	0.784974	10.5769	3.81437e-26	1.51086e-23	6h_vs_0h	ENSMUSG00000039997	Ifi203
ENSMUSG00000040033	469	582	682	487	1841	2243	1925	2358	7569	6867	12014	4098	3362.45	3.78227	0.202591	15.7819	4.1463e-56	6.08628e-53	6h_vs_0h	ENSMUSG00000040033	Stat2
ENSMUSG00000040253	40	26	43	23	503	322	535	314	4295	2939	5229	1839	1340.52	6.76807	0.395002	15.6533	3.15512e-55	4.14383e-52	6h_vs_0h	ENSMUSG00000040253	Gbp7
ENSMUSG00000040264	41	83	78	57	474	378	798	363	6628	4894	13235	3476	2496.16	6.77063	0.420665	14.7044	6.04078e-49	5.58303e-46	6h_vs_0h	ENSMUSG00000040264	Gbp2b
ENSMUSG00000040296	212	222	405	177	1229	1139	1357	1330	5433	4854	6544	3200	2172.65	4.36586	0.229344	16.4855	4.66382e-61	7.75873e-58	6h_vs_0h	ENSMUSG00000040296	Ddx58
ENSMUSG00000040328	0	0	0	0	6	2	12	1	247	60	218	54	50.5148	9.63456	1.27462	7.09982	1.24919e-12	2.44743e-10	6h_vs_0h	ENSMUSG00000040328	Olfr56
ENSMUSG00000040428	26	33	65	33	52	71	100	66	394	229	1110	119	181.649	3.5389	0.510823	5.78262	7.35473e-09	1.20743e-06	6h_vs_0h	ENSMUSG00000040428	Plekha4
ENSMUSG00000040483	20	43	57	28	183	197	263	156	2165	1732	3145	1077	747.815	5.82588	0.34055	15.3895	1.92586e-53	2.28847e-50	6h_vs_0h	ENSMUSG00000040483	Xaf1
ENSMUSG00000040613	35	47	78	45	86	122	108	138	298	283	551	212	163.676	2.74974	0.242893	8.91231	4.99787e-19	1.52094e-16	6h_vs_0h	ENSMUSG00000040613	Apobec1
ENSMUSG00000041827	0	0	2	0	29	14	16	33	203	229	259	131	76.0238	8.70507	1.02107	7.95251	1.82769e-15	4.3854e-13	6h_vs_0h	ENSMUSG00000041827	Oasl1
ENSMUSG00000042901	397	416	528	348	377	575	502	604	1372	994	1936	766	724.333	1.60717	0.207833	4.91824	8.73245e-07	0.000122421	6h_vs_0h	ENSMUSG00000042901	Aida
ENSMUSG00000043953	1	1	1	0	7	3	0	1	35	12	82	11	12.4706	5.52821	1.16627	4.23846	2.25053e-05	0.0027665	6h_vs_0h	ENSMUSG00000043953	Ccrl2
ENSMUSG00000045827	163	104	275	99	204	187	260	199	950	435	1855	328	410.243	2.49485	0.45842	4.16617	3.09759e-05	0.00369843	6h_vs_0h	ENSMUSG00000045827	Serpinb9
ENSMUSG00000045932	180	70	166	65	619	395	790	410	3658	4387	9065	3005	1873.62	5.3691	0.452431	10.5742	3.92459e-26	1.53022e-23	6h_vs_0h	ENSMUSG00000045932	Ifit2
ENSMUSG00000046718	60	68	111	48	197	194	240	169	3876	3465	5805	1698	1298.43	5.71447	0.307237	16.6955	1.41406e-62	2.52046e-59	6h_vs_0h	ENSMUSG00000046718	Bst2
ENSMUSG00000046805	1	0	3	0	1	9	6	9	164	85	138	52	38.9009	6.83907	0.836504	7.47644	7.63644e-14	1.73236e-11	6h_vs_0h	ENSMUSG00000046805	Mpeg1
ENSMUSG00000046879	55	62	106	46	1529	1074	2195	1077	4414	4303	8474	2816	2164.61	6.25181	0.379891	14.9169	2.55728e-50	2.65893e-47	6h_vs_0h	ENSMUSG00000046879	Irgm1
ENSMUSG00000047067	57	47	76	43	56	68	68	68	163	157	345	76	98.7042	1.70731	0.318969	3.51855	0.000433919	0.0454959	6h_vs_0h	ENSMUSG00000047067	Dusp28
ENSMUSG00000047735	17	23	54	17	294	205	462	224	2847	1581	4073	1400	936.075	6.57614	0.453934	13.1983	8.97894e-40	6.40173e-37	6h_vs_0h	ENSMUSG00000047735	Samd9l
ENSMUSG00000048852	0	0	0	0	30	19	38	12	239	132	290	107	73.0051	10.0391	1.13491	8.33029	8.06419e-17	2.14078e-14	6h_vs_0h	ENSMUSG00000048852	Gm12185
ENSMUSG00000049502	62	75	75	58	804	647	782	729	3481	3060	4905	2070	1393.36	5.65515	0.266397	19.0323	9.21941e-81	2.87576e-77	6h_vs_0h	ENSMUSG00000049502	Dtx3l
ENSMUSG00000050541	32	35	40	25	38	31	33	32	110	106	137	64	56.7161	1.68195	0.248566	4.41309	1.01903e-05	0.00131077	6h_vs_0h	ENSMUSG00000050541	Adra1b
ENSMUSG00000050565	1515	1660	2380	1358	1586	2358	2656	2501	4044	4151	7427	2712	2796.84	1.42443	0.215442	3.89631	9.76707e-05	0.0110785	6h_vs_0h	ENSMUSG00000050565	Tor1aip2
ENSMUSG00000052776	3	5	2	3	10	17	17	21	749	544	1165	272	227.626	7.68505	0.522668	13.5842	4.96723e-42	3.75613e-39	6h_vs_0h	ENSMUSG00000052776	Oas1a
ENSMUSG00000053835	1	0	6	0	8	4	5	4	121	86	81	37	29.3866	5.6277	0.722478	6.97973	2.95754e-12	5.63378e-10	6h_vs_0h	ENSMUSG00000053835	H2-T24
ENSMUSG00000054072	26	5	40	6	1804	732	2220	634	5934	4712	11578	3669	2621.33	8.45723	0.646726	12.1724	4.35891e-34	2.26609e-31	6h_vs_0h	ENSMUSG00000054072	Iigp1
ENSMUSG00000054203	0	0	0	0	7	19	37	34	118	141	440	116	73.417	10.0755	1.14555	8.28469	1.18418e-16	3.01532e-14	6h_vs_0h	ENSMUSG00000054203	Ifi205
ENSMUSG00000054404	9	2	19	4	24	41	53	47	1472	991	2111	618	442.615	7.30888	0.464349	14.4802	1.61594e-47	1.39049e-44	6h_vs_0h	ENSMUSG00000054404	Slfn5
ENSMUSG00000056116	93	64	191	53	218	187	306	215	1914	1444	3161	629	683.497	4.19071	0.421185	8.56088	1.12005e-17	3.14041e-15	6h_vs_0h	ENSMUSG00000056116	H2-T22
ENSMUSG00000056144	6	7	7	5	28	27	32	29	50	53	78	26	28.4728	3.05041	0.391383	6.29923	2.99131e-10	5.37016e-08	6h_vs_0h	ENSMUSG00000056144	Trim34a
ENSMUSG00000057137	10	11	13	7	11	47	46	32	51	106	226	66	49.9176	3.43048	0.481559	5.90889	3.44412e-09	5.88661e-07	6h_vs_0h	ENSMUSG00000057137	Tmem140
ENSMUSG00000057143	155	94	283	74	222	209	301	237	510	553	529	352	291.697	1.77916	0.326334	3.65933	0.00025288	0.0275562	6h_vs_0h	ENSMUSG00000057143	Trim12c
ENSMUSG00000057346	2	0	6	0	11	8	16	11	102	151	244	69	49.8316	6.16091	0.647728	8.60841	7.40837e-18	2.12492e-15	6h_vs_0h	ENSMUSG00000057346	Apol9a
ENSMUSG00000057554	317	394	583	326	429	702	857	793	2156	1882	3973	1307	1117.56	2.54902	0.261741	7.50367	6.20544e-14	1.42065e-11	6h_vs_0h	ENSMUSG00000057554	Lgals8
ENSMUSG00000057596	0	0	0	0	2	0	0	1	182	65	182	36	38.5953	9.29289	1.18725	7.3345	2.22554e-13	4.76786e-11	6h_vs_0h	ENSMUSG00000057596	Trim30d
ENSMUSG00000058163	0	0	0	0	0	1	3	1	48	27	55	16	12.4637	7.62783	1.1327	6.21775	5.04328e-10	8.98929e-08	6h_vs_0h	ENSMUSG00000058163	Gm5431
ENSMUSG00000060183	1	2	0	3	12	4	6	7	142	65	120	54	35.4597	6.00032	0.744389	7.27484	3.46819e-13	7.21209e-11	6h_vs_0h	ENSMUSG00000060183	Cxcl11
ENSMUSG00000060519	39	58	86	48	499	465	744	439	4947	4078	10377	2198	1935.61	6.54662	0.387944	15.3672	2.71547e-53	3.08009e-50	6h_vs_0h	ENSMUSG00000060519	Tor3a
ENSMUSG00000060802	831	715	1561	584	1170	1119	1954	1196	5171	3472	7227	2529	2273.95	2.37968	0.34836	5.15178	2.5802e-07	3.8787e-05	6h_vs_0h	ENSMUSG00000060802	B2m
ENSMUSG00000061232	58	175	245	134	88	214	217	252	752	961	2480	498	479.699	2.94548	0.41648	5.6677	1.44727e-08	2.33002e-06	6h_vs_0h	ENSMUSG00000061232	H2-K1
ENSMUSG00000062488	0	0	2	0	273	105	307	101	1721	1637	4134	1122	770.413	12.0822	1.13767	10.1059	5.2029e-24	1.88164e-21	6h_vs_0h	ENSMUSG00000062488	Ifit3b
ENSMUSG00000063268	39	63	128	44	129	148	250	156	1281	1412	2542	599	544.798	4.45177	0.377186	10.2516	1.16375e-24	4.2706e-22	6h_vs_0h	ENSMUSG00000063268	Parp10
ENSMUSG00000063388	0	2	5	2	177	201	421	191	96	133	508	125	152.57	6.60769	0.73486	8.1957	2.49136e-16	6.21693e-14	6h_vs_0h	ENSMUSG00000063388	NA
ENSMUSG00000066677	0	0	0	0	2	0	1	0	98	13	73	10	16.5059	8.05072	1.37549	5.42768	5.70906e-08	8.79407e-06	6h_vs_0h	ENSMUSG00000066677	Ifi208
ENSMUSG00000066861	1	0	1	3	3	9	15	13	156	146	305	76	58.7245	7.05309	0.755255	8.56411	1.08911e-17	3.08836e-15	6h_vs_0h	ENSMUSG00000066861	Oas1g
ENSMUSG00000067203	0	0	0	0	2	8	5	5	1	17	22	6	5.07867	5.8821	1.25844	4.20926	2.56214e-05	0.00308868	6h_vs_0h	ENSMUSG00000067203	H2-K2
ENSMUSG00000067212	26	21	52	19	38	30	58	22	298	239	474	79	108.998	3.21229	0.480021	5.47328	4.41788e-08	6.93358e-06	6h_vs_0h	ENSMUSG00000067212	H2-T23
ENSMUSG00000067297	1	0	0	0	0	3	6	2	10	12	21	10	5.39943	5.45801	1.15385	4.22325	2.408e-05	0.00292594	6h_vs_0h	ENSMUSG00000067297	Ifit1bl2
ENSMUSG00000068079	12	22	18	14	13	54	22	52	72	120	95	46	42.7578	2.32896	0.319271	5.46232	4.69954e-08	7.32953e-06	6h_vs_0h	ENSMUSG00000068079	Tcf15
ENSMUSG00000068245	4	6	4	6	14	15	32	20	454	130	648	117	118.993	6.04513	0.611671	8.92658	4.3938e-19	1.35362e-16	6h_vs_0h	ENSMUSG00000068245	Phf11d
ENSMUSG00000068246	0	0	0	0	0	3	4	4	78	112	176	68	36.3475	9.18599	1.06566	8.07103	6.97069e-16	1.70536e-13	6h_vs_0h	ENSMUSG00000068246	Apol9b
ENSMUSG00000068417	7	7	13	3	14	11	20	14	35	31	147	20	25.562	2.94525	0.603435	3.91135	9.17812e-05	0.0105054	6h_vs_0h	ENSMUSG00000068417	Pnp2
ENSMUSG00000068606	0	0	0	0	110	96	155	85	113	125	277	102	88.5257	9.70309	1.09642	8.31623	9.08077e-17	2.38528e-14	6h_vs_0h	ENSMUSG00000068606	Gm4841
ENSMUSG00000069793	29	18	45	13	201	84	219	77	1420	423	1714	302	377.147	5.24075	0.612255	7.60427	2.86513e-14	6.62005e-12	6h_vs_0h	ENSMUSG00000069793	Slfn9
ENSMUSG00000069874	27	16	47	15	2094	1129	2280	1123	2579	1891	5171	1154	1458.7	6.70522	0.494554	12.3752	3.55874e-35	1.93054e-32	6h_vs_0h	ENSMUSG00000069874	Irgm2
ENSMUSG00000069892	0	0	1	0	2	1	9	1	41	24	110	28	17.8504	7.36753	1.24774	5.43586	5.45332e-08	8.4523e-06	6h_vs_0h	ENSMUSG00000069892	9930111J21Rik2
ENSMUSG00000069893	0	1	0	0	1	0	2	0	7	5	31	6	4.29596	5.29239	1.33782	3.51872	0.000433641	0.0454959	6h_vs_0h	ENSMUSG00000069893	9930111J21Rik1
ENSMUSG00000070031	0	1	4	1	2	1	7	2	42	25	120	10	16.8366	5.04909	0.951134	4.69344	2.68648e-06	0.000356587	6h_vs_0h	ENSMUSG00000070031	Sp140
ENSMUSG00000070034	0	0	1	0	1	0	1	2	124	65	260	48	40.534	8.63968	1.15497	6.97396	3.08151e-12	5.82546e-10	6h_vs_0h	ENSMUSG00000070034	Sp110
ENSMUSG00000070327	999	758	2414	642	2956	3963	5444	3908	40393	65596	77775	40260	20252.1	5.63427	0.32746	15.4195	1.20989e-53	1.50958e-50	6h_vs_0h	ENSMUSG00000070327	Rnf213
ENSMUSG00000071350	103	114	127	75	106	144	150	175	313	228	599	168	187.11	1.6418	0.292806	3.60921	0.00030713	0.033035	6h_vs_0h	ENSMUSG00000071350	Setdb2
ENSMUSG00000072620	1	8	13	6	2	46	36	33	37	121	196	78	45.8741	4.00272	0.686069	4.9816	6.30593e-07	8.94081e-05	6h_vs_0h	ENSMUSG00000072620	Slfn2
ENSMUSG00000072621	6	5	10	3	11	25	12	20	115	79	113	54	37.4998	3.96321	0.395977	8.53135	1.44654e-17	4.01077e-15	6h_vs_0h	ENSMUSG00000072621	Slfn10-ps
ENSMUSG00000073144	3	1	2	0	9	12	14	5	22	27	54	12	13.0158	4.23276	0.754045	4.83758	1.31427e-06	0.000181647	6h_vs_0h	ENSMUSG00000073144	4930599N23Rik
ENSMUSG00000073411	188	304	254	259	145	425	224	462	1295	1909	2777	902	732.869	2.73208	0.269923	7.95444	1.7995e-15	4.35967e-13	6h_vs_0h	ENSMUSG00000073411	H2-D1
ENSMUSG00000073489	7	6	20	7	45	103	136	94	1134	588	1825	410	356.395	6.67385	0.491018	12.4005	2.5981e-35	1.47348e-32	6h_vs_0h	ENSMUSG00000073489	Ifi204
ENSMUSG00000073490	0	2	2	0	10	31	37	23	74	80	154	50	37.4782	6.50457	0.820414	7.21534	5.37974e-13	1.10947e-10	6h_vs_0h	ENSMUSG00000073490	Ifi207
ENSMUSG00000073555	0	0	0	0	62	31	68	12	541	229	610	214	149.736	11.0989	1.20011	8.76075	1.93957e-18	5.62792e-16	6h_vs_0h	ENSMUSG00000073555	Gm4951
ENSMUSG00000074151	14	30	53	27	30	141	109	155	1229	1222	2410	646	487.769	5.50274	0.401133	12.2596	1.49194e-34	7.92123e-32	6h_vs_0h	ENSMUSG00000074151	Nlrc5
ENSMUSG00000074896	1	1	3	2	623	229	684	225	4104	4027	10516	2451	1856.83	11.5434	0.778895	14.0691	5.87866e-45	4.88987e-42	6h_vs_0h	ENSMUSG00000074896	Ifit3
ENSMUSG00000075010	0	0	0	0	0	0	0	0	25	4	17	3	4.1161	6.07471	1.50542	3.64662	0.00026571	0.0288284	6h_vs_0h	ENSMUSG00000075010	AW112010
ENSMUSG00000075602	0	0	3	1	4	3	2	3	65	40	67	19	17.0024	5.61485	0.842063	5.97324	2.32586e-09	4.00272e-07	6h_vs_0h	ENSMUSG00000075602	Ly6a
ENSMUSG00000078349	16	35	16	30	42	80	75	81	296	333	449	195	135.221	3.6921	0.287201	10.8185	2.81225e-27	1.15044e-24	6h_vs_0h	ENSMUSG00000078349	NA
ENSMUSG00000078616	0	0	1	0	1	4	1	1	21	44	74	28	14.1886	7.0798	1.11102	5.84578	5.04198e-09	8.50119e-07	6h_vs_0h	ENSMUSG00000078616	NA
ENSMUSG00000078853	7	10	18	9	931	462	910	459	2632	2386	6669	1447	1300.68	8.22454	0.516188	14.7999	1.46671e-49	1.4077e-46	6h_vs_0h	ENSMUSG00000078853	Igtp
ENSMUSG00000078920	0	5	3	0	93	26	121	28	1037	573	1517	352	309.399	8.82825	0.858016	9.60734	7.44473e-22	2.51048e-19	6h_vs_0h	ENSMUSG00000078920	Ifi47
ENSMUSG00000078921	0	0	0	0	5	10	9	5	228	137	348	143	74.4886	10.2044	1.08311	8.88132	6.60724e-19	1.98647e-16	6h_vs_0h	ENSMUSG00000078921	Tgtp2
ENSMUSG00000078922	0	0	1	0	6	4	14	4	78	102	215	98	43.735	8.67621	1.12261	7.20753	5.69755e-13	1.15591e-10	6h_vs_0h	ENSMUSG00000078922	Tgtp1
ENSMUSG00000078954	27	57	51	39	35	78	36	61	217	170	421	83	101.814	2.33527	0.361843	4.83709	1.31755e-06	0.000181647	6h_vs_0h	ENSMUSG00000078954	Arhgap8
ENSMUSG00000079017	2	0	3	1	3	1	6	0	62	38	69	20	16.982	5.00047	0.817015	5.40439	6.50308e-08	9.9557e-06	6h_vs_0h	ENSMUSG00000079017	Ifi27l2a
ENSMUSG00000079197	108	127	192	111	174	222	218	238	595	554	771	282	292.766	2.05297	0.199794	7.34744	2.02042e-13	4.38414e-11	6h_vs_0h	ENSMUSG00000079197	Psme2
ENSMUSG00000079363	1	4	1	2	67	31	76	35	1019	463	1750	323	307.61	8.76561	0.751525	10.8853	1.35392e-27	5.63096e-25	6h_vs_0h	ENSMUSG00000079363	Gbp4
ENSMUSG00000079491	3	2	2	1	5	3	10	8	65	31	82	19	18.9912	4.61902	0.696339	5.79319	6.90639e-09	1.14895e-06	6h_vs_0h	ENSMUSG00000079491	H2-T10
ENSMUSG00000082292	4	5	2	4	52	30	85	20	910	384	1475	235	260.836	7.57939	0.70367	9.93986	2.79206e-23	9.95329e-21	6h_vs_0h	ENSMUSG00000082292	NA
ENSMUSG00000085977	0	0	0	0	10	3	8	6	123	46	85	29	26.2225	8.60817	1.16133	6.90862	4.89379e-12	9.18194e-10	6h_vs_0h	ENSMUSG00000085977	NA
ENSMUSG00000086184	1	3	5	3	4	6	8	2	27	15	61	14	12.171	3.30816	0.67387	4.04108	5.32047e-05	0.00620406	6h_vs_0h	ENSMUSG00000086184	NA
ENSMUSG00000090215	9	10	26	8	35	45	32	48	67	103	115	52	44.3946	2.70322	0.284101	7.45588	8.92704e-14	2.00689e-11	6h_vs_0h	ENSMUSG00000090215	Trim34b
ENSMUSG00000090222	0	0	0	1	10	1	7	2	123	41	240	24	36.1025	8.40398	1.30188	6.00589	1.90286e-09	3.32056e-07	6h_vs_0h	ENSMUSG00000090222	NA
ENSMUSG00000090272	1	0	0	0	10	8	12	9	260	71	335	39	60.5324	9.14906	1.18713	7.21412	5.4285e-13	1.11035e-10	6h_vs_0h	ENSMUSG00000090272	Mndal
ENSMUSG00000090942	9	3	8	6	446	254	533	231	840	927	1955	792	504.741	7.43502	0.525953	13.024	8.9367e-39	5.71811e-36	6h_vs_0h	ENSMUSG00000090942	F830016B08Rik
ENSMUSG00000091549	37	58	104	51	114	127	151	153	543	650	1117	417	287.739	3.49022	0.266555	10.8992	1.16331e-27	5.00505e-25	6h_vs_0h	ENSMUSG00000091549	NA
ENSMUSG00000091649	0	0	0	0	0	0	0	1	70	18	134	12	18.7228	8.25628	1.32514	5.78904	7.07905e-09	1.16987e-06	6h_vs_0h	ENSMUSG00000091649	Phf11b
ENSMUSG00000092021	0	0	0	1	9	5	10	3	29	15	61	11	11.8551	6.54351	1.19803	4.9736	6.57196e-07	9.26535e-05	6h_vs_0h	ENSMUSG00000092021	Gbp11
ENSMUSG00000096727	14	20	29	20	76	72	89	70	435	309	774	174	169.254	4.3437	0.384853	9.7666	1.56623e-22	5.35392e-20	6h_vs_0h	ENSMUSG00000096727	Psmb9
ENSMUSG00000097006	2	6	10	3	7	5	7	14	60	45	129	21	24.5145	3.6211	0.562303	5.3994	6.68655e-08	1.01742e-05	6h_vs_0h	ENSMUSG00000097006	9530082P21Rik
ENSMUSG00000097194	1	2	7	1	30	24	46	20	33	18	69	12	21.6717	3.64159	0.71815	4.25621	2.07925e-05	0.00256859	6h_vs_0h	ENSMUSG00000097194	NA
ENSMUSG00000097572	2	2	4	2	2	8	1	9	20	51	24	32	13.0572	3.72891	0.620905	5.06343	4.11785e-07	6.08028e-05	6h_vs_0h	ENSMUSG00000097572	NA
ENSMUSG00000104713	1	1	0	1	63	31	24	28	411	303	530	180	130.639	8.88189	0.940793	8.81904	1.15449e-18	3.42967e-16	6h_vs_0h	ENSMUSG00000104713	Gbp6
ENSMUSG00000105096	0	0	0	0	2	4	3	4	146	91	128	46	35.1482	9.12712	1.08213	7.89382	2.93081e-15	6.96529e-13	6h_vs_0h	ENSMUSG00000105096	Gbp10
ENSMUSG00000105504	2	0	5	0	9	5	17	6	266	81	337	48	63.3483	6.77362	0.877361	7.05367	1.74262e-12	3.34503e-10	6h_vs_0h	ENSMUSG00000105504	Gbp5
ENSMUSG00000106734	6	1	6	1	46	43	41	53	327	203	336	193	106.686	6.30904	0.481199	11.8954	1.25117e-32	6.12189e-30	6h_vs_0h	ENSMUSG00000106734	NA
ENSMUSG00000107017	0	0	0	0	20	20	8	10	23	42	26	26	14.7763	7.33781	1.10199	6.12785	8.90726e-10	1.5764e-07	6h_vs_0h	ENSMUSG00000107017	NA
ENSMUSG00000107215	2	2	0	0	33	36	40	32	184	113	219	86	62.3537	7.25621	0.788765	8.45779	2.72494e-17	7.47231e-15	6h_vs_0h	ENSMUSG00000107215	NA
ENSMUSG00000108068	0	5	0	2	36	18	23	26	48	38	57	25	23.4007	4.59966	0.688449	5.83146	5.49447e-09	9.20195e-07	6h_vs_0h	ENSMUSG00000108068	NA
ENSMUSG00000108732	22	17	52	12	28	36	69	39	190	118	397	>	85.2757	2.97789	0.496268	4.82177	1.42293e-06	0.000194032	6h_vs_0h	ENSMUSG00000108732	NA
ENSMUSG00000108801	4	4	8	5	6	9	11	9	18	30	59	16	14.3593	2.53999	0.48646	4.01882	5.84911e-05	0.00674663	6h_vs_0h	ENSMUSG00000108801	NA
ENSMUSG00000109729	1	0	0	0	4	4	5	5	31	20	26	9	8.67778	6.14888	1.09937	5.06097	4.17125e-07	6.1229e-05	6h_vs_0h	ENSMUSG00000109729	NA
ENSMUSG00000111118	0	2	0	2	0	2	3	5	55	13	64	10	12.7416	5.11563	1.00964	4.48737	7.21093e-06	0.000937196	6h_vs_0h	ENSMUSG00000111118	NA
ENSMUSG00000112627	17	25	33	21	21	33	33	18	96	102	172	42	49.4573	2.09078	0.348298	4.32323	1.53758e-05	0.00195759	6h_vs_0h	ENSMUSG00000112627	4933412E12Rik
ENSMUSG00000115338	57	67	144	53	93	101	160	112	370	296	1228	152	223.931	2.66918	0.484142	4.30489	1.67071e-05	0.00211629	6h_vs_0h	ENSMUSG00000115338	Pnp
ENSMUSG00000116033	0	0	1	0	1	1	5	4	11	6	26	3	4.5792	5.19052	1.25807	3.66079	0.000251436	0.027519	6h_vs_0h	ENSMUSG00000116033	NA
ENSMUSG00000116639	0	0	0	0	11	11	11	9	9	13	14	14	7.86195	6.13143	1.09638	5.05884	4.2181e-07	6.15546e-05	6h_vs_0h	ENSMUSG00000116639	NA
ENSMUSG00000000386	0	0	1	0	37	86	73	67	589	449	1586	253	249.266	3.47572	0.46065	6.27531	3.48941e-10	1.5384e-07	6h_vs_1h	ENSMUSG00000000386	Mx1
ENSMUSG00000000409	35	56	41	42	36	64	32	59	118	129	131	92	69.2082	1.42246	0.203513	4.11504	3.8711e-05	0.00859224	6h_vs_1h	ENSMUSG00000000409	Lck
ENSMUSG00000001123	125	83	255	59	253	124	339	123	3343	1749	4403	984	971.421	3.53976	0.534812	5.52486	3.29744e-08	1.12899e-05	6h_vs_1h	ENSMUSG00000001123	Lgals9
ENSMUSG00000001166	8	13	12	7	19	44	41	33	131	163	264	88	66.5795	2.29168	0.290182	5.88142	4.06759e-09	1.61619e-06	6h_vs_1h	ENSMUSG00000001166	Oas1c
ENSMUSG00000006930	692	839	696	676	825	1231	517	1303	4229	3869	6792	1903	1907.45	2.18722	0.282058	5.68047	1.34323e-08	4.91257e-06	6h_vs_1h	ENSMUSG00000006930	Hap1
ENSMUSG00000010358	14	23	86	22	84	101	219	107	1331	1221	3054	581	546.787	3.54734	0.510813	5.79928	6.66005e-09	2.5825e-06	6h_vs_1h	ENSMUSG00000010358	Ifi35
ENSMUSG00000012519	2	5	7	2	11	16	13	10	187	120	322	67	61.6393	3.81667	0.4452	7.25893	3.90153e-13	2.92016e-10	6h_vs_1h	ENSMUSG00000012519	Mlkl
ENSMUSG00000017830	9	21	14	16	26	34	44	35	518	438	841	276	186.652	3.93547	0.313785	10.6776	1.29561e-26	2.77986e-23	6h_vs_1h	ENSMUSG00000017830	Dhx58
ENSMUSG00000019866	7	13	29	14	12	18	18	22	81	69	233	43	44.4281	2.63444	0.456545	4.48903	7.1548e-06	0.00177131	6h_vs_1h	ENSMUSG00000019866	Crybg1
ENSMUSG00000020143	2	3	6	2	2	3	2	4	56	26	37	8	12.3195	3.62067	0.661888	4.58638	4.50997e-06	0.00118974	6h_vs_1h	ENSMUSG00000020143	Dock2
ENSMUSG00000020464	289	378	432	309	550	937	734	905	2479	2223	3647	1600	1190.9	1.7608	0.162752	7.22452	5.02864e-13	3.67822e-10	6h_vs_1h	ENSMUSG00000020464	Pnpt1
ENSMUSG00000020638	44	84	39	62	543	421	491	460	3194	2359	5587	1448	1205.27	2.68509	0.381595	5.50345	3.72422e-08	1.25091e-05	6h_vs_1h	ENSMUSG00000020638	Cmpk2
ENSMUSG00000020641	3	2	7	2	494	541	700	457	5468	5500	17928	3746	2794.31	3.8495	0.428957	7.6103	2.73451e-14	2.31598e-11	6h_vs_1h	ENSMUSG00000020641	Rsad2
ENSMUSG00000020953	21	34	18	18	12	29	19	23	676	147	319	100	120.071	4.047	0.532751	6.49834	8.121e-11	3.96009e-08	6h_vs_1h	ENSMUSG00000020953	Coch
ENSMUSG00000021583	83	110	132	78	88	137	145	172	740	571	767	386	282.621	2.28669	0.193207	8.80762	1.27836e-18	1.52381e-15	6h_vs_1h	ENSMUSG00000021583	Erap1
ENSMUSG00000022014	0	1	1	0	0	2	2	3	28	21	31	20	9.23575	3.97859	0.656315	5.17068	2.33244e-07	7.21801e-05	6h_vs_1h	ENSMUSG00000022014	Epsti1
ENSMUSG00000022548	3	11	9	7	15	17	6	24	583	361	299	230	133.592	4.71749	0.398896	10.3598	3.77732e-25	7.59809e-22	6h_vs_1h	ENSMUSG00000022548	Apod
ENSMUSG00000022575	12	12	21	7	6	14	12	12	41	36	82	23	22.387	2.11999	0.39399	3.89601	9.77885e-05	0.0204365	6h_vs_1h	ENSMUSG00000022575	Gsdmd
ENSMUSG00000022587	530	489	871	372	544	572	635	628	5734	3350	6341	1903	1807.3	2.8887	0.30592	7.5304	5.05857e-14	4.17448e-11	6h_vs_1h	ENSMUSG00000022587	Ly6e
ENSMUSG00000022906	35	71	67	53	270	299	318	277	2708	2494	3960	1587	1004.19	3.23021	0.24054	10.9969	3.95284e-28	9.78602e-25	6h_vs_1h	ENSMUSG00000022906	Parp9
ENSMUSG00000024066	14	3	16	5	6	20	10	10	239	79	435	54	71.4604	4.19542	0.627223	5.7562	8.60278e-09	3.25731e-06	6h_vs_1h	ENSMUSG00000024066	Xdh
ENSMUSG00000024079	410	443	693	331	1128	1167	1295	1285	5661	4596	7467	3148	2288.71	2.13363	0.222891	6.94794	3.7065e-12	2.33902e-09	6h_vs_1h	ENSMUSG00000024079	Eif2ak2
ENSMUSG00000024308	502	548	1116	453	639	846	1096	863	5311	4530	8176	2419	2154.72	2.58357	0.291482	6.85657	7.05333e-12	3.98253e-09	6h_vs_1h	ENSMUSG00000024308	Tapbp
ENSMUSG00000024338	3	8	12	8	27	30	58	40	648	607	1437	281	252.506	4.23839	0.416678	8.76789	1.82038e-18	2.09239e-15	6h_vs_1h	ENSMUSG00000024338	Psmb8
ENSMUSG00000024339	47	69	117	57	86	85	112	80	944	844	1983	383	385.064	3.4715	0.368814	7.82643	5.01915e-15	4.61532e-12	6h_vs_1h	ENSMUSG00000024339	Tap2
ENSMUSG00000024371	3	10	9	6	6	6	8	6	30	32	63	15	15.6298	2.44946	0.459998	4.05319	5.05231e-05	0.0109867	6h_vs_1h	ENSMUSG00000024371	C2
ENSMUSG00000024678	0	0	1	0	2	1	4	0	74	25	84	18	17.3134	4.82031	0.842939	5.02446	5.04861e-07	0.000147713	6h_vs_1h	ENSMUSG00000024678	Ms4a4d
ENSMUSG00000025324	127	181	231	154	105	219	205	241	714	673	1157	390	356.637	2.01255	0.225807	6.32199	2.58216e-10	1.15422e-07	6h_vs_1h	ENSMUSG00000025324	Atp10a
ENSMUSG00000025492	303	277	711	226	688	556	1077	563	4527	3243	7229	1843	1735.19	2.49428	0.409697	4.66023	3.15862e-06	0.000861501	6h_vs_1h	ENSMUSG00000025492	Ifitm3
ENSMUSG00000025498	1	1	3	1	26	34	103	43	751	837	2219	411	351.952	4.29685	0.530184	7.00106	2.5403e-12	1.63514e-09	6h_vs_1h	ENSMUSG00000025498	Irf7
ENSMUSG00000026104	128	121	223	95	647	1029	732	1018	4885	5054	6184	3193	1928.55	2.58842	0.142495	14.0596	6.72447e-45	7.21401e-41	6h_vs_1h	ENSMUSG00000026104	Stat1
ENSMUSG00000026222	0	2	0	2	18	15	37	11	1196	514	1709	380	319.241	5.50094	0.572839	8.58172	9.34674e-18	1.03729e-14	6h_vs_1h	ENSMUSG00000026222	Sp100
ENSMUSG00000026466	503	545	809	446	680	820	956	881	2676	2157	4827	1437	1365.88	1.7548	0.267012	4.38106	1.18106e-05	0.00281564	6h_vs_1h	ENSMUSG00000026466	Tor1aip1
ENSMUSG00000026535	18	45	61	44	151	224	397	283	1918	1133	3197	915	689.106	2.8007	0.400114	5.53767	3.06522e-08	1.06077e-05	6h_vs_1h	ENSMUSG00000026535	Ifi202b
ENSMUSG00000026536	1	6	4	4	11	10	16	18	153	91	310	54	54.5153	3.48092	0.490659	5.9021	3.58899e-09	1.44385e-06	6h_vs_1h	ENSMUSG00000026536	Ifi211
ENSMUSG00000026896	11	15	15	13	179	165	277	182	2761	2065	5172	1339	995.108	3.79493	0.359953	8.91764	4.76341e-19	6.13222e-16	6h_vs_1h	ENSMUSG00000026896	Ifih1
ENSMUSG00000026946	18	9	23	7	17	28	24	23	210	139	301	94	73.3429	3.07836	0.36023	6.92158	4.4662e-12	2.67767e-09	6h_vs_1h	ENSMUSG00000026946	Nmi
ENSMUSG00000027078	96	44	272	45	176	95	328	95	1884	1257	2785	585	622.485	3.11684	0.605419	4.18196	2.89002e-05	0.00645919	6h_vs_1h	ENSMUSG00000027078	Ube2l6
ENSMUSG00000027360	3	3	3	2	1	1	5	2	32	17	32	12	9.45958	3.44438	0.645668	4.42856	9.48665e-06	0.00231302	6h_vs_1h	ENSMUSG00000027360	Hdc
ENSMUSG00000027514	1	0	1	1	10	10	11	10	479	314	743	202	146.122	5.43792	0.417264	11.6303	2.89005e-31	1.03348e-27	6h_vs_1h	ENSMUSG00000027514	Zbp1
ENSMUSG00000027580	134	131	331	107	814	944	1796	1017	3838	4276	10320	2532	2118.4	2.16284	0.404227	3.90335	9.48688e-05	0.0199559	6h_vs_1h	ENSMUSG00000027580	Helz2
ENSMUSG00000027669	593	531	709	413	593	662	525	738	2182	1596	2876	925	1010.86	1.6311	0.248074	4.21687	2.47714e-05	0.00557513	6h_vs_1h	ENSMUSG00000027669	Gnb4
ENSMUSG00000027951	940	1312	1422	1078	1534	2286	1591	2493	4774	5691	7546	3161	2751.66	1.4959	0.131487	6.92766	4.27864e-12	2.64815e-09	6h_vs_1h	ENSMUSG00000027951	Adar
ENSMUSG00000028037	3	0	3	0	212	166	231	154	5408	2904	6223	2031	1443.64	4.42292	0.409133	9.38061	6.55913e-21	1.00523e-17	6h_vs_1h	ENSMUSG00000028037	Ifi44
ENSMUSG00000028268	12	19	16	18	252	206	260	202	4932	3661	5725	2239	1458.95	4.16407	0.304507	11.7537	6.76258e-32	3.10924e-28	6h_vs_1h	ENSMUSG00000028268	Gbp3
ENSMUSG00000028270	66	109	127	93	595	411	1003	414	6249	3997	10648	2431	2137.09	3.18977	0.439168	5.93114	3.00836e-09	1.2413e-06	6h_vs_1h	ENSMUSG00000028270	Gbp2
ENSMUSG00000028995	1040	1314	1367	1085	907	1390	1056	1680	3540	3016	4567	1842	1864.61	1.45901	0.16747	5.21888	1.80006e-07	5.62459e-05	6h_vs_1h	ENSMUSG00000028995	Fam126a
ENSMUSG00000029298	56	19	68	20	249	125	271	110	4386	2720	5477	1815	1273.94	4.16982	0.508689	7.04718	1.82576e-12	1.22417e-09	6h_vs_1h	ENSMUSG00000029298	Gbp9
ENSMUSG00000029322	6	10	16	8	15	12	16	10	210	40	211	13	46.1517	3.11925	0.681587	3.71815	0.000200683	0.0411388	6h_vs_1h	ENSMUSG00000029322	Plac8
ENSMUSG00000029417	0	0	0	0	13	5	14	2	244	105	110	62	47.678	3.88072	0.698474	4.71845	2.37648e-06	0.000665083	6h_vs_1h	ENSMUSG00000029417	Cxcl9
ENSMUSG00000029561	11	11	16	14	302	195	307	187	7832	5607	7853	3485	2163.12	4.61351	0.350599	11.4903	1.4753e-30	4.74809e-27	6h_vs_1h	ENSMUSG00000029561	Oasl2
ENSMUSG00000029605	8	2	13	1	103	157	175	164	455	518	781	290	217.096	1.81602	0.271633	4.53193	5.84467e-06	0.00148114	6h_vs_1h	ENSMUSG00000029605	Oas1b
ENSMUSG00000029798	9	14	11	10	10	35	27	31	304	211	524	173	111.836	3.6696	0.350152	8.8093	1.25927e-18	1.52381e-15	6h_vs_1h	ENSMUSG00000029798	Herc6
ENSMUSG00000029826	332	326	507	264	746	733	864	797	5921	5436	8875	3405	2327.19	2.92668	0.232273	10.0816	6.6646e-24	1.26173e-20	6h_vs_1h	ENSMUSG00000029826	Zc3hav1
ENSMUSG00000030107	6	5	5	5	1298	1140	954	1103	7055	9380	9722	5118	2964.92	2.80523	0.230368	9.63776	5.53833e-22	8.91228e-19	6h_vs_1h	ENSMUSG00000030107	Usp18
ENSMUSG00000030921	1	0	3	0	19	19	33	21	2832	1557	3058	1074	719.124	6.56532	0.400077	14.9479	1.60657e-50	5.17057e-46	6h_vs_1h	ENSMUSG00000030921	Trim30a
ENSMUSG00000031639	9	7	11	6	118	68	98	109	952	514	1221	416	294.537	2.98461	0.3707	6.47319	9.59538e-11	4.60922e-08	6h_vs_1h	ENSMUSG00000031639	Tlr3
ENSMUSG00000031897	119	104	188	92	156	182	218	171	1752	1133	2952	550	614.66	3.11801	0.366491	6.9115	4.7955e-12	2.80615e-09	6h_vs_1h	ENSMUSG00000031897	Psmb10
ENSMUSG00000032596	37	26	118	25	104	122	284	126	809	756	1783	373	366.618	2.49613	0.505087	3.78376	0.000154476	0.0318695	6h_vs_1h	ENSMUSG00000032596	Uba7
ENSMUSG00000032661	1	2	1	0	2	6	0	2	90	72	179	32	30.8644	5.28179	0.678654	6.92075	4.49273e-12	2.67767e-09	6h_vs_1h	ENSMUSG00000032661	Oas3
ENSMUSG00000032690	0	0	0	0	11	8	3	8	662	369	549	236	155.317	5.98746	0.46058	11.7297	8.98007e-32	3.61268e-28	6h_vs_1h	ENSMUSG00000032690	Oas2
ENSMUSG00000033355	0	1	4	5	140	122	218	127	1174	856	1391	558	383.319	2.7091	0.373147	5.69239	1.25275e-08	4.63431e-06	6h_vs_1h	ENSMUSG00000033355	Rtp4
ENSMUSG00000033576	3	5	12	2	10	26	25	32	61	102	158	70	40.9839	2.17475	0.343803	4.62401	3.76386e-06	0.00100112	6h_vs_1h	ENSMUSG00000033576	Apol6
ENSMUSG00000033880	49	42	152	42	156	125	303	136	2553	1742	4872	849	885.839	3.71998	0.502535	6.23832	4.42295e-10	1.92362e-07	6h_vs_1h	ENSMUSG00000033880	Lgals3bp
ENSMUSG00000034422	16	21	22	18	223	221	264	202	4022	3674	6767	2377	1468.61	4.20788	0.276728	13.0918	3.6675e-39	2.95087e-35	6h_vs_1h	ENSMUSG00000034422	Parp14
ENSMUSG00000034855	5	5	7	1	428	189	1015	158	4815	2848	15433	1825	2123.71	3.61453	0.714237	4.24163	2.219e-05	0.00511049	6h_vs_1h	ENSMUSG00000034855	Cxcl10
ENSMUSG00000034947	14	28	37	24	24	68	60	68	238	281	433	166	116.916	2.43992	0.259573	7.14602	8.93303e-13	6.3889e-10	6h_vs_1h	ENSMUSG00000034947	Tmem106a
ENSMUSG00000035208	0	2	1	3	21	8	6	9	179	75	134	59	42.4209	3.333	0.570983	4.81276	1.48859e-06	0.000422166	6h_vs_1h	ENSMUSG00000035208	Slfn8
ENSMUSG00000035517	211	328	394	236	394	595	460	654	2134	2495	3355	1371	1028.73	2.22432	0.14297	11.4661	1.95157e-30	5.70995e-27	6h_vs_1h	ENSMUSG00000035517	Tdrd7
ENSMUSG00000035692	3	4	6	2	293	256	472	256	3938	4177	9554	2297	1714.11	3.90491	0.400203	8.29555	1.08084e-16	1.02311e-13	6h_vs_1h	ENSMUSG00000035692	Isg15
ENSMUSG00000035929	31	55	56	39	77	71	99	96	1358	675	2352	332	421.007	3.76136	0.432385	7.34613	2.04034e-13	1.60162e-10	6h_vs_1h	ENSMUSG00000035929	H2-Q4
ENSMUSG00000036912	0	3	2	4	2	4	2	0	24	24	51	14	10.5879	3.85461	0.69592	4.69825	2.62399e-06	0.000721798	6h_vs_1h	ENSMUSG00000036912	Piwil4
ENSMUSG00000036986	697	807	1330	665	984	1275	1292	1435	3815	3657	6790	2121	2017.24	1.75072	0.228435	5.10305	3.34215e-07	9.95962e-05	6h_vs_1h	ENSMUSG00000036986	Pml
ENSMUSG00000037921	6	2	6	4	30	64	80	52	1141	852	1491	615	361.907	4.25171	0.323439	11.3366	8.64168e-30	2.3177e-26	6h_vs_1h	ENSMUSG00000037921	Ddx60
ENSMUSG00000038213	39	43	62	34	33	39	47	50	196	166	335	85	91.3817	2.24073	0.298948	5.5385	3.05069e-08	1.06077e-05	6h_vs_1h	ENSMUSG00000038213	Tapbpl
ENSMUSG00000038507	228	185	285	144	322	359	405	442	5164	4811	6726	2765	1803.03	3.71501	0.211372	14.8081	1.29954e-49	2.09122e-45	6h_vs_1h	ENSMUSG00000038507	Parp12
ENSMUSG00000038774	744	940	1083	765	813	1378	1085	1553	3296	3298	4204	2299	1766.48	1.55281	0.105827	9.14515	5.95485e-20	8.33265e-17	6h_vs_1h	ENSMUSG00000038774	Ascc3
ENSMUSG00000038884	38	46	96	23	104	100	103	83	381	389	594	210	177.075	2.00306	0.322759	4.39354	1.11521e-05	0.0026785	6h_vs_1h	ENSMUSG00000038884	A230050P20Rik
ENSMUSG00000039146	0	1	0	0	0	1	0	1	346	88	171	73	58.523	8.54095	1.13527	7.008	2.41753e-12	1.58787e-09	6h_vs_1h	ENSMUSG00000039146	Ifi44l
ENSMUSG00000039236	7	13	12	8	21	41	47	40	323	181	778	84	122.781	3.19797	0.496977	5.25774	1.4584e-07	4.64723e-05	6h_vs_1h	ENSMUSG00000039236	Isg20
ENSMUSG00000039304	0	0	0	0	4	5	2	1	66	34	87	22	18.2043	4.15597	0.653909	5.46096	4.73555e-08	1.57123e-05	6h_vs_1h	ENSMUSG00000039304	Tnfsf10
ENSMUSG00000039853	2	4	2	3	23	30	11	12	262	294	408	153	98.6742	3.90306	0.35631	9.31228	1.25117e-20	1.83034e-17	6h_vs_1h	ENSMUSG00000039853	Trim14
ENSMUSG00000039997	3	2	3	1	54	48	140	42	1273	384	2328	330	373.744	3.84679	0.623406	5.23221	1.67494e-07	5.28493e-05	6h_vs_1h	ENSMUSG00000039997	Ifi203
ENSMUSG00000040033	469	582	682	487	1841	2243	1925	2358	7569	6867	12014	4098	3362.45	1.90625	0.200842	6.57856	4.75011e-11	2.46576e-08	6h_vs_1h	ENSMUSG00000040033	Stat2
ENSMUSG00000040253	40	26	43	23	503	322	535	314	4295	2939	5229	1839	1340.52	3.04793	0.375733	6.555	5.56426e-11	2.79813e-08	6h_vs_1h	ENSMUSG00000040253	Gbp7
ENSMUSG00000040264	41	83	78	57	474	378	798	363	6628	4894	13235	3476	2496.16	3.7523	0.411902	7.68945	1.47767e-14	1.28533e-11	6h_vs_1h	ENSMUSG00000040264	Gbp2b
ENSMUSG00000040296	212	222	405	177	1229	1139	1357	1330	5433	4854	6544	3200	2172.65	2.01852	0.225518	6.35658	2.0629e-10	9.35106e-08	6h_vs_1h	ENSMUSG00000040296	Ddx58
ENSMUSG00000040328	0	0	0	0	6	2	12	1	247	60	218	54	50.5148	4.70798	0.821328	5.01989	5.17002e-07	0.000149903	6h_vs_1h	ENSMUSG00000040328	Olfr56
ENSMUSG00000040428	26	33	65	33	52	71	100	66	394	229	1110	119	181.649	2.63381	0.50421	4.06341	4.83614e-05	0.0105882	6h_vs_1h	ENSMUSG00000040428	Plekha4
ENSMUSG00000040483	20	43	57	28	183	197	263	156	2165	1732	3145	1077	747.815	3.3376	0.322141	8.54472	1.28853e-17	1.38233e-14	6h_vs_1h	ENSMUSG00000040483	Xaf1
ENSMUSG00000040613	35	47	78	45	86	122	108	138	298	283	551	212	163.676	1.6398	0.230707	4.57201	4.83062e-06	0.00126397	6h_vs_1h	ENSMUSG00000040613	Apobec1
ENSMUSG00000041827	0	0	2	0	29	14	16	33	203	229	259	131	76.0238	3.20908	0.315096	8.32787	8.23122e-17	8.5456e-14	6h_vs_1h	ENSMUSG00000041827	Oasl1
ENSMUSG00000042901	397	416	528	348	377	575	502	604	1372	994	1936	766	724.333	1.38322	0.20732	3.85016	0.000118042	0.0245101	6h_vs_1h	ENSMUSG00000042901	Aida
ENSMUSG00000045932	180	70	166	65	619	395	790	410	3658	4387	9065	3005	1873.62	3.11392	0.448538	5.63815	1.71886e-08	6.14665e-06	6h_vs_1h	ENSMUSG00000045932	Ifit2
ENSMUSG00000046718	60	68	111	48	197	194	240	169	3876	3465	5805	1698	1298.43	4.19011	0.298955	12.059	1.73776e-33	9.32134e-30	6h_vs_1h	ENSMUSG00000046718	Bst2
ENSMUSG00000046805	1	0	3	0	1	9	6	9	164	85	138	52	38.9009	4.28191	0.505397	7.31486	2.57645e-13	1.97429e-10	6h_vs_1h	ENSMUSG00000046805	Mpeg1
ENSMUSG00000047735	17	23	54	17	294	205	462	224	2847	1581	4073	1400	936.075	3.03325	0.433114	5.65266	1.57983e-08	5.71296e-06	6h_vs_1h	ENSMUSG00000047735	Samd9l
ENSMUSG00000048852	0	0	0	0	30	19	38	12	239	132	290	107	73.0051	2.91113	0.516856	4.50054	6.7781e-06	0.00169106	6h_vs_1h	ENSMUSG00000048852	Gm12185
ENSMUSG00000049502	62	75	75	58	804	647	782	729	3481	3060	4905	2070	1393.36	2.1949	0.252676	6.37138	1.87339e-10	8.6133e-08	6h_vs_1h	ENSMUSG00000049502	Dtx3l
ENSMUSG00000050541	32	35	40	25	38	31	33	32	110	106	137	64	56.7161	1.68142	0.247364	4.43241	9.31858e-06	0.00228938	6h_vs_1h	ENSMUSG00000050541	Adra1b
ENSMUSG00000052776	3	5	2	3	10	17	17	21	749	544	1165	272	227.626	5.4493	0.382968	12.7016	5.79603e-37	3.73079e-33	6h_vs_1h	ENSMUSG00000052776	Oas1a
ENSMUSG00000053835	1	0	6	0	8	4	5	4	121	86	81	37	29.3866	3.96751	0.552106	6.12656	8.97989e-10	3.80275e-07	6h_vs_1h	ENSMUSG00000053835	H2-T24
ENSMUSG00000054203	0	0	0	0	7	19	37	34	118	141	440	116	73.417	3.134	0.542329	4.7001	2.6004e-06	0.000721476	6h_vs_1h	ENSMUSG00000054203	Ifi205
ENSMUSG00000054404	9	2	19	4	24	41	53	47	1472	991	2111	618	442.615	5.03268	0.405314	10.9734	5.12962e-28	1.17923e-24	6h_vs_1h	ENSMUSG00000054404	Slfn5
ENSMUSG00000056116	93	64	191	53	218	187	306	215	1914	1444	3161	629	683.497	2.90188	0.417191	5.55354	2.79947e-08	9.90089e-06	6h_vs_1h	ENSMUSG00000056116	H2-T22
ENSMUSG00000057346	2	0	6	0	11	8	16	11	102	151	244	69	49.8316	3.6004	0.441013	6.83744	8.06202e-12	4.47359e-09	6h_vs_1h	ENSMUSG00000057346	Apol9a
ENSMUSG00000057554	317	394	583	326	429	702	857	793	2156	1882	3973	1307	1117.56	1.79904	0.260659	4.65758	3.19952e-06	0.000865322	6h_vs_1h	ENSMUSG00000057554	Lgals8
ENSMUSG00000057596	0	0	0	0	2	0	0	1	182	65	182	36	38.5953	7.31043	1.02371	6.56969	5.04193e-11	2.57571e-08	6h_vs_1h	ENSMUSG00000057596	Trim30d
ENSMUSG00000058163	0	0	0	0	0	1	3	1	48	27	55	16	12.4637	4.94023	0.811741	5.3653	8.08157e-08	2.62725e-05	6h_vs_1h	ENSMUSG00000058163	Gm5431
ENSMUSG00000060183	1	2	0	3	12	4	6	7	142	65	120	54	35.4597	3.74193	0.53267	5.92661	3.09249e-09	1.25986e-06	6h_vs_1h	ENSMUSG00000060183	Cxcl11
ENSMUSG00000060519	39	58	86	48	499	465	744	439	4947	4078	10377	2198	1935.61	3.27592	0.376886	7.13989	9.34031e-13	6.53497e-10	6h_vs_1h	ENSMUSG00000060519	Tor3a
ENSMUSG00000061232	58	175	245	134	88	214	217	252	752	961	2480	498	479.699	2.65176	0.415575	4.97325	6.5839e-07	0.000189193	6h_vs_1h	ENSMUSG00000061232	H2-K1
ENSMUSG00000062488	0	0	2	0	273	105	307	101	1721	1637	4134	1122	770.413	3.31597	0.56755	4.81185	1.49537e-06	0.000422166	6h_vs_1h	ENSMUSG00000062488	Ifit3b
ENSMUSG00000063268	39	63	128	44	129	148	250	156	1281	1412	2542	599	544.798	3.06055	0.370295	6.68535	2.30366e-11	1.24374e-08	6h_vs_1h	ENSMUSG00000063268	Parp10
ENSMUSG00000066677	0	0	0	0	2	0	1	0	98	13	73	10	16.5059	5.95776	1.21897	4.40761	1.04518e-05	0.00252917	6h_vs_1h	ENSMUSG00000066677	Ifi208
ENSMUSG00000066861	1	0	1	3	3	9	15	13	156	146	305	76	58.7245	4.14992	0.461138	7.73069	1.06967e-14	9.56281e-12	6h_vs_1h	ENSMUSG00000066861	Oas1g
ENSMUSG00000067212	26	21	52	19	38	30	58	22	298	239	474	79	108.998	2.78949	0.474637	4.64457	3.40778e-06	0.000913968	6h_vs_1h	ENSMUSG00000067212	H2-T23
ENSMUSG00000068245	4	6	4	6	14	15	32	20	454	130	648	117	118.993	4.06677	0.544376	6.39589	1.59615e-10	7.44499e-08	6h_vs_1h	ENSMUSG00000068245	Phf11d
ENSMUSG00000068246	0	0	0	0	0	3	4	4	78	112	176	68	36.3475	5.38556	0.53606	8.95526	3.38937e-19	4.54515e-16	6h_vs_1h	ENSMUSG00000068246	Apol9b
ENSMUSG00000069892	0	0	1	0	2	1	9	1	41	24	110	28	17.8504	3.90922	0.816836	4.06963	4.70875e-05	0.0103799	6h_vs_1h	ENSMUSG00000069892	9930111J21Rik2
ENSMUSG00000070031	0	1	4	1	2	1	7	2	42	25	120	10	16.8366	3.94469	0.837367	4.01221	6.01526e-05	0.0129063	6h_vs_1h	ENSMUSG00000070031	Sp140
ENSMUSG00000070034	0	0	1	0	1	0	1	2	124	65	260	48	40.534	7.00164	0.903512	7.10188	1.23073e-12	8.42762e-10	6h_vs_1h	ENSMUSG00000070034	Sp110
ENSMUSG00000070327	999	758	2414	642	2956	3963	5444	3908	40393	65596	77775	40260	20252.1	3.81312	0.32694	9.87373	5.41144e-23	9.67566e-20	6h_vs_1h	ENSMUSG00000070327	Rnf213
ENSMUSG00000072621	6	5	10	3	11	25	12	20	115	79	113	54	37.4998	2.53078	0.316618	6.1455	7.97118e-10	3.42059e-07	6h_vs_1h	ENSMUSG00000072621	Slfn10-ps
ENSMUSG00000073411	188	304	254	259	145	425	224	462	1295	1909	2777	902	732.869	2.57144	0.269412	7.37323	1.66539e-13	1.33997e-10	6h_vs_1h	ENSMUSG00000073411	H2-D1
ENSMUSG00000073489	7	6	20	7	45	103	136	94	1134	588	1825	410	356.395	3.43381	0.438135	6.50213	7.91885e-11	3.92093e-08	6h_vs_1h	ENSMUSG00000073489	Ifi204
ENSMUSG00000073555	0	0	0	0	62	31	68	12	541	229	610	214	149.736	3.1102	0.640739	3.94107	8.11174e-05	0.0171755	6h_vs_1h	ENSMUSG00000073555	Gm4951
ENSMUSG00000074151	14	30	53	27	30	141	109	155	1229	1222	2410	646	487.769	3.78314	0.38524	8.30168	1.02648e-16	1.00514e-13	6h_vs_1h	ENSMUSG00000074151	Nlrc5
ENSMUSG00000074896	1	1	3	2	623	229	684	225	4104	4027	10516	2451	1856.83	3.42609	0.552449	5.14272	2.7079e-07	8.22179e-05	6h_vs_1h	ENSMUSG00000074896	Ifit3
ENSMUSG00000075010	0	0	0	0	0	0	0	0	25	4	17	3	4.1161	6.13082	1.50543	3.68388	0.000229709	0.0464966	6h_vs_1h	ENSMUSG00000075010	AW112010
ENSMUSG00000075602	0	0	3	1	4	3	2	3	65	40	67	19	17.0024	4.04494	0.591491	5.84953	4.92969e-09	1.93484e-06	6h_vs_1h	ENSMUSG00000075602	Ly6a
ENSMUSG00000078349	16	35	16	30	42	80	75	81	296	333	449	195	135.221	2.27579	0.262599	6.43866	1.20531e-10	5.70468e-08	6h_vs_1h	ENSMUSG00000078349	NA
ENSMUSG00000078616	0	0	1	0	1	4	1	1	21	44	74	28	14.1886	4.64865	0.704096	5.77144	7.85976e-09	3.01141e-06	6h_vs_1h	ENSMUSG00000078616	NA
ENSMUSG00000078920	0	5	3	0	93	26	121	28	1037	573	1517	352	309.399	3.5485	0.683459	4.33603	1.45081e-05	0.00340825	6h_vs_1h	ENSMUSG00000078920	Ifi47
ENSMUSG00000078921	0	0	0	0	5	10	9	5	228	137	348	143	74.4886	4.96959	0.452332	9.6933	3.21944e-22	5.4534e-19	6h_vs_1h	ENSMUSG00000078921	Tgtp2
ENSMUSG00000078922	0	0	1	0	6	4	14	4	78	102	215	98	43.735	4.14256	0.53959	6.59308	4.30782e-11	2.27284e-08	6h_vs_1h	ENSMUSG00000078922	Tgtp1
ENSMUSG00000078954	27	57	51	39	35	78	36	61	217	170	421	83	101.814	2.15185	0.359342	4.36032	1.29875e-05	0.00307345	6h_vs_1h	ENSMUSG00000078954	Arhgap8
ENSMUSG00000079017	2	0	3	1	3	1	6	0	62	38	69	20	16.982	4.20214	0.714328	5.0637	4.11196e-07	0.000121412	6h_vs_1h	ENSMUSG00000079017	Ifi27l2a
ENSMUSG00000079197	108	127	192	111	174	222	218	238	595	554	771	282	292.766	1.41429	0.195991	4.23128	2.32365e-05	0.00530387	6h_vs_1h	ENSMUSG00000079197	Psme2
ENSMUSG00000079363	1	4	1	2	67	31	76	35	1019	463	1750	323	307.61	3.98644	0.560629	6.06718	1.30174e-09	5.44092e-07	6h_vs_1h	ENSMUSG00000079363	Gbp4
ENSMUSG00000079491	3	2	2	1	5	3	10	8	65	31	82	19	18.9912	2.95407	0.551567	4.29517	1.74562e-05	0.00407108	6h_vs_1h	ENSMUSG00000079491	H2-T10
ENSMUSG00000082292	4	5	2	4	52	30	85	20	910	384	1475	235	260.836	3.88664	0.60754	5.43445	5.49657e-08	1.80512e-05	6h_vs_1h	ENSMUSG00000082292	NA
ENSMUSG00000085977	0	0	0	0	10	3	8	6	123	46	85	29	26.2225	3.38726	0.617705	4.53657	5.71764e-06	0.00146045	6h_vs_1h	ENSMUSG00000085977	NA
ENSMUSG00000090222	0	0	0	1	10	1	7	2	123	41	240	24	36.1025	4.23068	0.864252	4.21831	2.46146e-05	0.00557513	6h_vs_1h	ENSMUSG00000090222	NA
ENSMUSG00000090272	1	0	0	0	10	8	12	9	260	71	335	39	60.5324	4.15615	0.648932	5.50312	3.73127e-08	1.25091e-05	6h_vs_1h	ENSMUSG00000090272	Mndal
ENSMUSG00000091549	37	58	104	51	114	127	151	153	543	650	1117	417	287.739	2.35403	0.257244	6.87688	6.11784e-12	3.51601e-09	6h_vs_1h	ENSMUSG00000091549	NA
ENSMUSG00000091649	0	0	0	0	0	0	0	1	70	18	134	12	18.7228	7.59104	1.32514	5.28701	1.2433e-07	4.00145e-05	6h_vs_1h	ENSMUSG00000091649	Phf11b
ENSMUSG00000096727	14	20	29	20	76	72	89	70	435	309	774	174	169.254	2.44052	0.359269	5.16471	2.40817e-07	7.38139e-05	6h_vs_1h	ENSMUSG00000096727	Psmb9
ENSMUSG00000097006	2	6	10	3	7	5	7	14	60	45	129	21	24.5145	2.98309	0.526037	4.5588	5.14479e-06	0.00132464	6h_vs_1h	ENSMUSG00000097006	9530082P21Rik
ENSMUSG00000097572	2	2	4	2	2	8	1	9	20	51	24	32	13.0572	2.84919	0.533852	4.24122	2.22306e-05	0.00511049	6h_vs_1h	ENSMUSG00000097572	NA
ENSMUSG00000104713	1	1	0	1	63	31	24	28	411	303	530	180	130.639	3.22467	0.461062	5.72519	1.03317e-08	3.86645e-06	6h_vs_1h	ENSMUSG00000104713	Gbp6
ENSMUSG00000105096	0	0	0	0	2	4	3	4	146	91	128	46	35.1482	5.07722	0.541153	8.3012	1.03062e-16	1.00514e-13	6h_vs_1h	ENSMUSG00000105096	Gbp10
ENSMUSG00000105504	2	0	5	0	9	5	17	6	266	81	337	48	63.3483	4.24204	0.711933	5.13678	2.79484e-07	8.40645e-05	6h_vs_1h	ENSMUSG00000105504	Gbp5
ENSMUSG00000106734	6	1	6	1	46	43	41	53	327	203	336	193	106.686	2.62286	0.304868	6.6844	2.31869e-11	1.24374e-08	6h_vs_1h	ENSMUSG00000106734	NA
ENSMUSG00000107215	2	2	0	0	33	36	40	32	184	113	219	86	62.3537	2.13888	0.344941	4.50478	6.64415e-06	0.00167059	6h_vs_1h	ENSMUSG00000107215	NA
ENSMUSG00000111118	0	2	0	2	0	2	3	5	55	13	64	10	12.7416	3.96456	0.85526	3.9515	7.76622e-05	0.0165529	6h_vs_1h	ENSMUSG00000111118	NA
ENSMUSG00000112627	17	25	33	21	21	33	33	18	96	102	172	42	49.4573	1.97125	0.34474	4.02115	5.79156e-05	0.0125098	6h_vs_1h	ENSMUSG00000112627	4933412E12Rik

## Sheet: Overlap_ISGs
ENSEMBL	Gene_Symbol	ISG_in_ESC	ISG_in_MEF	ISG_in_NPC
ENSMUSG00000085977	NA	FALSE	FALSE	TRUE
ENSMUSG00000001642	Akr1b3	FALSE	FALSE	TRUE
ENSMUSG00000004952	Rasa4	FALSE	FALSE	TRUE
ENSMUSG00000020143	Dock2	FALSE	FALSE	TRUE
ENSMUSG00000020953	Coch	FALSE	FALSE	TRUE
ENSMUSG00000022514	Il1rap	FALSE	FALSE	TRUE
ENSMUSG00000023224	Serping1	FALSE	FALSE	TRUE
ENSMUSG00000024019	Cmtr1	FALSE	FALSE	TRUE
ENSMUSG00000024421	Lama3	FALSE	FALSE	TRUE
ENSMUSG00000030046	Bmp10	FALSE	FALSE	TRUE
ENSMUSG00000034438	Gbp8	FALSE	FALSE	TRUE
ENSMUSG00000034842	Art3	FALSE	FALSE	TRUE
ENSMUSG00000037860	Aim2	FALSE	FALSE	TRUE
ENSMUSG00000038866	Zcchc2	FALSE	FALSE	TRUE
ENSMUSG00000050541	Adra1b	FALSE	FALSE	TRUE
ENSMUSG00000067203	H2-K2	FALSE	FALSE	TRUE
ENSMUSG00000068079	Tcf15	FALSE	FALSE	TRUE
ENSMUSG00000029417	Cxcl9	FALSE	TRUE	TRUE
ENSMUSG00000039997	Ifi203	FALSE	TRUE	TRUE
ENSMUSG00000048852	Gm12185	FALSE	TRUE	TRUE
ENSMUSG00000050370	Ch25h	FALSE	TRUE	TRUE
ENSMUSG00000054203	Ifi205	FALSE	TRUE	TRUE
ENSMUSG00000063388	NA	FALSE	TRUE	TRUE
ENSMUSG00000068606	Gm4841	FALSE	TRUE	TRUE
ENSMUSG00000073489	Ifi204	FALSE	TRUE	TRUE
ENSMUSG00000073490	Ifi207	FALSE	TRUE	TRUE
ENSMUSG00000090942	F830016B08Rik	FALSE	TRUE	TRUE
ENSMUSG00000097194	NA	FALSE	TRUE	TRUE
ENSMUSG00000102964	NA	FALSE	TRUE	TRUE
ENSMUSG00000104713	Gbp6	FALSE	TRUE	TRUE
ENSMUSG00000107017	NA	FALSE	TRUE	TRUE
ENSMUSG00000000708	Kat2b	FALSE	TRUE	TRUE
ENSMUSG00000002227	Mov10	FALSE	TRUE	TRUE
ENSMUSG00000006611	Hfe	FALSE	TRUE	TRUE
ENSMUSG00000006930	Hap1	FALSE	TRUE	TRUE
ENSMUSG00000019866	Crybg1	FALSE	TRUE	TRUE
ENSMUSG00000020572	Nampt	FALSE	TRUE	TRUE
ENSMUSG00000020676	Ccl11	FALSE	TRUE	TRUE
ENSMUSG00000020790	Ankfy1	FALSE	TRUE	TRUE
ENSMUSG00000021809	Nudt13	FALSE	TRUE	TRUE
ENSMUSG00000022548	Apod	FALSE	TRUE	TRUE
ENSMUSG00000023186	Vwa5a	FALSE	TRUE	TRUE
ENSMUSG00000023206	Il15ra	FALSE	TRUE	TRUE
ENSMUSG00000024066	Xdh	FALSE	TRUE	TRUE
ENSMUSG00000024457	Trim26	FALSE	TRUE	TRUE
ENSMUSG00000024678	Ms4a4d	FALSE	TRUE	TRUE
ENSMUSG00000026536	Ifi211	FALSE	TRUE	TRUE
ENSMUSG00000027360	Hdc	FALSE	TRUE	TRUE
ENSMUSG00000027639	Samhd1	FALSE	TRUE	TRUE
ENSMUSG00000027669	Gnb4	FALSE	TRUE	TRUE
ENSMUSG00000028995	Fam126a	FALSE	TRUE	TRUE
ENSMUSG00000029322	Plac8	FALSE	TRUE	TRUE
ENSMUSG00000032372	Plscr2	FALSE	TRUE	TRUE
ENSMUSG00000033487	Fndc3a	FALSE	TRUE	TRUE
ENSMUSG00000033538	Casp4	FALSE	TRUE	TRUE
ENSMUSG00000033576	Apol6	FALSE	TRUE	TRUE
ENSMUSG00000034947	Tmem106a	FALSE	TRUE	TRUE
ENSMUSG00000035208	Slfn8	FALSE	TRUE	TRUE
ENSMUSG00000035505	Cox18	FALSE	TRUE	TRUE
ENSMUSG00000036912	Piwil4	FALSE	TRUE	TRUE
ENSMUSG00000036986	Pml	FALSE	TRUE	TRUE
ENSMUSG00000037826	Ppm1k	FALSE	TRUE	TRUE
ENSMUSG00000038213	Tapbpl	FALSE	TRUE	TRUE
ENSMUSG00000039146	Ifi44l	FALSE	TRUE	TRUE
ENSMUSG00000039616	Mocos	FALSE	TRUE	TRUE
ENSMUSG00000040328	Olfr56	FALSE	TRUE	TRUE
ENSMUSG00000040428	Plekha4	FALSE	TRUE	TRUE
ENSMUSG00000042901	Aida	FALSE	TRUE	TRUE
ENSMUSG00000043953	Ccrl2	FALSE	TRUE	TRUE
ENSMUSG00000045827	Serpinb9	FALSE	TRUE	TRUE
ENSMUSG00000047067	Dusp28	FALSE	TRUE	TRUE
ENSMUSG00000057137	Tmem140	FALSE	TRUE	TRUE
ENSMUSG00000058163	Gm5431	FALSE	TRUE	TRUE
ENSMUSG00000060183	Cxcl11	FALSE	TRUE	TRUE
ENSMUSG00000066677	Ifi208	FALSE	TRUE	TRUE
ENSMUSG00000068245	Phf11d	FALSE	TRUE	TRUE
ENSMUSG00000068417	Pnp2	FALSE	TRUE	TRUE
ENSMUSG00000069892	9930111J21Rik2	FALSE	TRUE	TRUE
ENSMUSG00000069893	9930111J21Rik1	FALSE	TRUE	TRUE
ENSMUSG00000070031	Sp140	FALSE	TRUE	TRUE
ENSMUSG00000070034	Sp110	FALSE	TRUE	TRUE
ENSMUSG00000071350	Setdb2	FALSE	TRUE	TRUE
ENSMUSG00000072620	Slfn2	FALSE	TRUE	TRUE
ENSMUSG00000072621	Slfn10-ps	FALSE	TRUE	TRUE
ENSMUSG00000075010	AW112010	FALSE	TRUE	TRUE
ENSMUSG00000078616	NA	FALSE	TRUE	TRUE
ENSMUSG00000078954	Arhgap8	FALSE	TRUE	TRUE
ENSMUSG00000079017	Ifi27l2a	FALSE	TRUE	TRUE
ENSMUSG00000086184	NA	FALSE	TRUE	TRUE
ENSMUSG00000090222	NA	FALSE	TRUE	TRUE
ENSMUSG00000090272	Mndal	FALSE	TRUE	TRUE
ENSMUSG00000091649	Phf11b	FALSE	TRUE	TRUE
ENSMUSG00000092021	Gbp11	FALSE	TRUE	TRUE
ENSMUSG00000105096	Gbp10	FALSE	TRUE	TRUE
ENSMUSG00000105504	Gbp5	FALSE	TRUE	TRUE
ENSMUSG00000108732	NA	FALSE	TRUE	TRUE
ENSMUSG00000108801	NA	FALSE	TRUE	TRUE
ENSMUSG00000112627	4933412E12Rik	FALSE	TRUE	TRUE
ENSMUSG00000115338	Pnp	FALSE	TRUE	TRUE
ENSMUSG00000116033	NA	FALSE	TRUE	TRUE
ENSMUSG00000022575	Gsdmd	FALSE	TRUE	TRUE
ENSMUSG00000079339	Ifit1bl1	FALSE	TRUE	FALSE
ENSMUSG00000035373	Ccl7	FALSE	TRUE	FALSE
ENSMUSG00000096954	NA	FALSE	TRUE	FALSE
ENSMUSG00000003665	Has1	FALSE	TRUE	FALSE
ENSMUSG00000053175	Bcl3	FALSE	TRUE	FALSE
ENSMUSG00000025746	Il6	FALSE	TRUE	FALSE
ENSMUSG00000044786	Zfp36	FALSE	TRUE	FALSE
ENSMUSG00000021250	Fos	FALSE	TRUE	FALSE
ENSMUSG00000035385	Ccl2	FALSE	TRUE	FALSE
ENSMUSG00000037447	Arid5a	FALSE	TRUE	FALSE
ENSMUSG00000032515	Csrnp1	FALSE	TRUE	FALSE
ENSMUSG00000035828	Pim3	FALSE	TRUE	FALSE
ENSMUSG00000071637	Cebpd	FALSE	TRUE	FALSE
ENSMUSG00000023087	Noct	FALSE	TRUE	FALSE
ENSMUSG00000003541	Ier3	FALSE	TRUE	FALSE
ENSMUSG00000035673	Sbno2	FALSE	TRUE	FALSE
ENSMUSG00000044703	Phf11a	FALSE	TRUE	FALSE
ENSMUSG00000033213	AA467197	FALSE	TRUE	FALSE
ENSMUSG00000043263	Ifi209	FALSE	TRUE	FALSE
ENSMUSG00000021565	Slc6a19	FALSE	TRUE	FALSE
ENSMUSG00000014030	Pax5	FALSE	TRUE	FALSE
ENSMUSG00000035852	Misp	FALSE	TRUE	FALSE
ENSMUSG00000025165	Sectm1a	FALSE	TRUE	FALSE
ENSMUSG00000090881	Phf11-ps	FALSE	TRUE	FALSE
ENSMUSG00000073491	Ifi213	FALSE	TRUE	FALSE
ENSMUSG00000104654	NA	FALSE	TRUE	FALSE
ENSMUSG00000028841	Cnksr1	FALSE	TRUE	FALSE
ENSMUSG00000046031	Calhm6	FALSE	TRUE	FALSE
ENSMUSG00000070501	Ifi214	FALSE	TRUE	FALSE
ENSMUSG00000063286	Gm8995	FALSE	TRUE	FALSE
ENSMUSG00000050014	Apol10b	FALSE	TRUE	FALSE
ENSMUSG00000029923	Rab19	FALSE	TRUE	FALSE
ENSMUSG00000078606	Gm4070	FALSE	TRUE	FALSE
ENSMUSG00000014773	Dll1	FALSE	TRUE	FALSE
ENSMUSG00000086513	NA	FALSE	TRUE	FALSE
ENSMUSG00000026971	Itgb6	FALSE	TRUE	FALSE
ENSMUSG00000079505	NA	FALSE	TRUE	FALSE
ENSMUSG00000116946	NA	FALSE	TRUE	FALSE
ENSMUSG00000005640	Insrr	FALSE	TRUE	FALSE
ENSMUSG00000082361	Btc	FALSE	TRUE	FALSE
ENSMUSG00000084846	NA	FALSE	TRUE	FALSE
ENSMUSG00000020805	Slc13a5	FALSE	TRUE	FALSE
ENSMUSG00000078153	Psme2b	FALSE	TRUE	FALSE
ENSMUSG00000031712	Il15	FALSE	TRUE	FALSE
ENSMUSG00000010601	Apol7a	FALSE	TRUE	FALSE
ENSMUSG00000085007	Gm11549	FALSE	TRUE	FALSE
ENSMUSG00000035561	Aldh1b1	FALSE	TRUE	FALSE
ENSMUSG00000053093	Myh7	FALSE	TRUE	FALSE
ENSMUSG00000053263	NA	FALSE	TRUE	FALSE
ENSMUSG00000027931	Npr1	FALSE	TRUE	FALSE
ENSMUSG00000033847	Pla2g4c	FALSE	TRUE	FALSE
ENSMUSG00000100706	NA	FALSE	TRUE	FALSE
ENSMUSG00000029771	Irf5	FALSE	TRUE	FALSE
ENSMUSG00000048186	Bend7	FALSE	TRUE	FALSE
ENSMUSG00000066800	Rnasel	FALSE	TRUE	FALSE
ENSMUSG00000031230	Fgf16	FALSE	TRUE	FALSE
ENSMUSG00000116617	NA	FALSE	TRUE	FALSE
ENSMUSG00000037440	Vnn1	FALSE	TRUE	FALSE
ENSMUSG00000020961	Ston2	FALSE	TRUE	FALSE
ENSMUSG00000039899	Fgl2	FALSE	TRUE	FALSE
ENSMUSG00000011267	Zfp296	FALSE	TRUE	FALSE
ENSMUSG00000037997	Parp11	FALSE	TRUE	FALSE
ENSMUSG00000023961	Enpp4	FALSE	TRUE	FALSE
ENSMUSG00000089809	A930011G23Rik	FALSE	TRUE	FALSE
ENSMUSG00000022197	Pdzd2	FALSE	TRUE	FALSE
ENSMUSG00000046157	Tmem229b	FALSE	TRUE	FALSE
ENSMUSG00000040329	Il7	FALSE	TRUE	FALSE
ENSMUSG00000092564	BC051226	FALSE	TRUE	FALSE
ENSMUSG00000053846	Lipg	FALSE	TRUE	FALSE
ENSMUSG00000035566	Pcdh17	FALSE	TRUE	FALSE
ENSMUSG00000042726	Trafd1	FALSE	TRUE	FALSE
ENSMUSG00000036833	Pnpla7	FALSE	TRUE	FALSE
ENSMUSG00000033781	Asb13	FALSE	TRUE	FALSE
ENSMUSG00000029321	Slc10a6	FALSE	TRUE	FALSE
ENSMUSG00000024805	Pcgf5	FALSE	TRUE	FALSE
ENSMUSG00000043811	Rtn4r	FALSE	TRUE	FALSE
ENSMUSG00000037419	Endod1	FALSE	TRUE	FALSE
ENSMUSG00000042333	Tnfrsf14	FALSE	TRUE	FALSE
ENSMUSG00000029330	Cds1	FALSE	TRUE	FALSE
ENSMUSG00000046688	Tifa	FALSE	TRUE	FALSE
ENSMUSG00000033715	Akr1c14	FALSE	TRUE	FALSE
ENSMUSG00000070427	Il18bp	FALSE	TRUE	FALSE
ENSMUSG00000020707	Rnf135	FALSE	TRUE	FALSE
ENSMUSG00000019082	Slc25a22	FALSE	TRUE	FALSE
ENSMUSG00000028362	Tnfsf8	FALSE	TRUE	FALSE
ENSMUSG00000002847	Pla1a	FALSE	TRUE	FALSE
ENSMUSG00000037940	Inpp4b	FALSE	TRUE	FALSE
ENSMUSG00000032322	Pstpip1	FALSE	TRUE	FALSE
ENSMUSG00000024112	Cacna1h	FALSE	TRUE	FALSE
ENSMUSG00000093661	Eif4e3	FALSE	TRUE	FALSE
ENSMUSG00000025887	Casp12	FALSE	TRUE	FALSE
ENSMUSG00000030275	Etnk1	FALSE	TRUE	FALSE
ENSMUSG00000030088	Aldh1l1	FALSE	TRUE	FALSE
ENSMUSG00000054728	Phactr1	FALSE	TRUE	FALSE
ENSMUSG00000042812	Foxf1	FALSE	TRUE	FALSE
ENSMUSG00000079018	Ly6c1	FALSE	TRUE	FALSE
ENSMUSG00000025089	Gfra1	FALSE	TRUE	FALSE
ENSMUSG00000025036	Sfxn2	FALSE	TRUE	FALSE
ENSMUSG00000079659	Tmem243	FALSE	TRUE	FALSE
ENSMUSG00000029780	Nt5c3	FALSE	TRUE	FALSE
ENSMUSG00000026797	Stxbp1	FALSE	TRUE	FALSE
ENSMUSG00000009585	Apobec3	FALSE	TRUE	FALSE
ENSMUSG00000110206	Flt3l	FALSE	TRUE	FALSE
ENSMUSG00000058589	Anks1b	FALSE	TRUE	FALSE
ENSMUSG00000006418	Rnf114	FALSE	TRUE	FALSE
ENSMUSG00000038058	Nod1	FALSE	TRUE	FALSE
ENSMUSG00000055447	Cd47	FALSE	TRUE	FALSE
ENSMUSG00000026102	Inpp1	FALSE	TRUE	FALSE
ENSMUSG00000045795	Whamm	FALSE	TRUE	FALSE
ENSMUSG00000051790	Nlgn2	FALSE	TRUE	FALSE
ENSMUSG00000038301	Snx10	FALSE	TRUE	FALSE
ENSMUSG00000034218	Atm	FALSE	TRUE	FALSE
ENSMUSG00000042842	Serpinb6b	FALSE	TRUE	FALSE
ENSMUSG00000068735	Trp53i11	FALSE	TRUE	FALSE
ENSMUSG00000037622	Wdtc1	FALSE	TRUE	FALSE
ENSMUSG00000037490	Slc2a12	FALSE	TRUE	FALSE
ENSMUSG00000027555	Car13	FALSE	TRUE	FALSE
ENSMUSG00000020357	Flt4	FALSE	TRUE	FALSE
ENSMUSG00000015377	Dennd6b	FALSE	TRUE	FALSE
ENSMUSG00000024472	Dcp2	FALSE	TRUE	FALSE
ENSMUSG00000097000	NA	FALSE	TRUE	FALSE
ENSMUSG00000023249	Parp3	FALSE	TRUE	FALSE
ENSMUSG00000025790	Slco3a1	FALSE	TRUE	FALSE
ENSMUSG00000066755	Tnfsf18	FALSE	TRUE	FALSE
ENSMUSG00000039531	Zup1	FALSE	TRUE	FALSE
ENSMUSG00000024302	Dtna	FALSE	TRUE	FALSE
ENSMUSG00000047098	Rnf31	FALSE	TRUE	FALSE
ENSMUSG00000036908	Unc93b1	FALSE	TRUE	FALSE
ENSMUSG00000034485	Uaca	FALSE	TRUE	FALSE
ENSMUSG00000041945	Mfsd9	FALSE	TRUE	FALSE
ENSMUSG00000035273	Hpse	FALSE	TRUE	FALSE
ENSMUSG00000040043	Rbms2	FALSE	TRUE	FALSE
ENSMUSG00000027293	Ehd4	FALSE	TRUE	FALSE
ENSMUSG00000028159	Dapp1	FALSE	TRUE	FALSE
ENSMUSG00000035151	Elmod2	FALSE	TRUE	FALSE
ENSMUSG00000028214	Gem	FALSE	TRUE	FALSE
ENSMUSG00000090523	Gypc	FALSE	TRUE	FALSE
ENSMUSG00000017929	B4galt5	FALSE	TRUE	FALSE
ENSMUSG00000050002	Idnk	FALSE	TRUE	FALSE
ENSMUSG00000025076	Casp7	FALSE	TRUE	FALSE
ENSMUSG00000037685	Atp8a1	FALSE	TRUE	FALSE
ENSMUSG00000001768	Rin2	FALSE	TRUE	FALSE
ENSMUSG00000049488	Tmem67	FALSE	TRUE	FALSE
ENSMUSG00000017057	Il13ra1	FALSE	TRUE	FALSE
ENSMUSG00000022309	Angpt1	FALSE	TRUE	FALSE
ENSMUSG00000021036	Sptlc2	FALSE	TRUE	FALSE
ENSMUSG00000022686	B3gnt5	FALSE	TRUE	FALSE
ENSMUSG00000039911	Spsb1	FALSE	TRUE	FALSE
ENSMUSG00000019699	Akt3	FALSE	TRUE	FALSE
ENSMUSG00000061288	Taok3	FALSE	TRUE	FALSE
ENSMUSG00000027068	Dhrs9	FALSE	TRUE	FALSE
ENSMUSG00000027009	Itga4	FALSE	TRUE	FALSE
ENSMUSG00000031266	Gla	FALSE	TRUE	FALSE
ENSMUSG00000026433	Rab29	FALSE	TRUE	FALSE
ENSMUSG00000031762	Mt2	FALSE	TRUE	FALSE
ENSMUSG00000048388	Fam171b	FALSE	TRUE	FALSE
ENSMUSG00000039983	Ccdc32	FALSE	TRUE	FALSE
ENSMUSG00000042350	Arel1	FALSE	TRUE	FALSE
ENSMUSG00000023307	March5	FALSE	TRUE	FALSE
ENSMUSG00000031652	N4bp1	FALSE	TRUE	FALSE
ENSMUSG00000032410	Xrn1	FALSE	TRUE	FALSE
ENSMUSG00000028028	Alpk1	FALSE	TRUE	FALSE
ENSMUSG00000040414	Slc25a28	FALSE	TRUE	FALSE
ENSMUSG00000080717	B230307C23Rik	FALSE	TRUE	FALSE
ENSMUSG00000061013	Mkx	FALSE	TRUE	FALSE
ENSMUSG00000034997	Htr2a	FALSE	TRUE	FALSE
ENSMUSG00000031557	Plekha2	FALSE	TRUE	FALSE
ENSMUSG00000024887	Asah2	FALSE	TRUE	FALSE
ENSMUSG00000003282	Plag1	FALSE	TRUE	FALSE
ENSMUSG00000030102	Itpr1	FALSE	TRUE	FALSE
ENSMUSG00000032344	Cgas	FALSE	TRUE	FALSE
ENSMUSG00000049659	Aftph	FALSE	TRUE	FALSE
ENSMUSG00000064128	Cenpj	FALSE	TRUE	FALSE
ENSMUSG00000037242	Clic4	FALSE	TRUE	FALSE
ENSMUSG00000027366	Sppl2a	FALSE	TRUE	FALSE
ENSMUSG00000028793	Rnf19b	FALSE	TRUE	FALSE
ENSMUSG00000001630	Stk38l	FALSE	TRUE	FALSE
ENSMUSG00000022602	Arc	FALSE	TRUE	FALSE
ENSMUSG00000034708	Grn	FALSE	TRUE	FALSE
ENSMUSG00000029640	Usp12	FALSE	TRUE	FALSE
ENSMUSG00000028599	Tnfrsf1b	FALSE	TRUE	FALSE
ENSMUSG00000027995	Tlr2	FALSE	TRUE	FALSE
ENSMUSG00000001156	Mxd1	FALSE	TRUE	FALSE
ENSMUSG00000042772	Smg7	FALSE	TRUE	FALSE
ENSMUSG00000009207	Lnpk	FALSE	TRUE	FALSE
ENSMUSG00000055670	Zzef1	FALSE	TRUE	FALSE
ENSMUSG00000037075	Rnf139	FALSE	TRUE	FALSE
ENSMUSG00000032548	Slco2a1	FALSE	TRUE	FALSE
ENSMUSG00000029405	G3bp2	FALSE	TRUE	FALSE
ENSMUSG00000049191	Rtl5	FALSE	TRUE	FALSE
ENSMUSG00000039285	Azi2	FALSE	TRUE	FALSE
ENSMUSG00000025178	Pi4k2a	FALSE	TRUE	FALSE
ENSMUSG00000034575	Tent4a	FALSE	TRUE	FALSE
ENSMUSG00000042106	Inka1	FALSE	TRUE	FALSE
ENSMUSG00000026269	Rnpepl1	FALSE	TRUE	FALSE
ENSMUSG00000037816	Fbxw17	FALSE	TRUE	FALSE
ENSMUSG00000042228	Lyn	FALSE	TRUE	FALSE
ENSMUSG00000029426	Scarb2	FALSE	TRUE	FALSE
ENSMUSG00000021242	Npc2	FALSE	TRUE	FALSE
ENSMUSG00000070730	Rmdn3	FALSE	TRUE	FALSE
ENSMUSG00000020134	Peli1	FALSE	TRUE	FALSE
ENSMUSG00000033088	Triobp	FALSE	TRUE	FALSE
ENSMUSG00000022035	Ccdc25	FALSE	TRUE	FALSE
ENSMUSG00000024789	Jak2	FALSE	TRUE	FALSE
ENSMUSG00000020128	Vps54	FALSE	TRUE	FALSE
ENSMUSG00000032333	Stoml1	FALSE	TRUE	FALSE
ENSMUSG00000024601	Isoc1	FALSE	TRUE	FALSE
ENSMUSG00000035021	Baz1a	FALSE	TRUE	FALSE
ENSMUSG00000056268	Dennd1b	FALSE	TRUE	FALSE
ENSMUSG00000038418	Egr1	FALSE	TRUE	FALSE
ENSMUSG00000034610	Tut4	FALSE	TRUE	FALSE
ENSMUSG00000054676	1600014C10Rik	FALSE	TRUE	FALSE
ENSMUSG00000035248	Tut7	FALSE	TRUE	FALSE
ENSMUSG00000048897	Zfp710	FALSE	TRUE	FALSE
ENSMUSG00000034484	Snx2	FALSE	TRUE	FALSE
ENSMUSG00000032712	Resf1	FALSE	TRUE	FALSE
ENSMUSG00000028245	Nsmaf	FALSE	TRUE	FALSE
ENSMUSG00000027962	Vcam1	FALSE	TRUE	FALSE
ENSMUSG00000028228	Cpne3	FALSE	TRUE	FALSE
ENSMUSG00000034614	Pik3ip1	FALSE	TRUE	FALSE
ENSMUSG00000020415	Pttg1	FALSE	TRUE	FALSE
ENSMUSG00000000386	Mx1	TRUE	TRUE	TRUE
ENSMUSG00000002325	Irf9	TRUE	TRUE	TRUE
ENSMUSG00000016496	Cd274	TRUE	TRUE	TRUE
ENSMUSG00000018899	Irf1	TRUE	TRUE	TRUE
ENSMUSG00000020638	Cmpk2	TRUE	TRUE	TRUE
ENSMUSG00000020641	Rsad2	TRUE	TRUE	TRUE
ENSMUSG00000022906	Parp9	TRUE	TRUE	TRUE
ENSMUSG00000023341	Mx2	TRUE	TRUE	TRUE
ENSMUSG00000025498	Irf7	TRUE	TRUE	TRUE
ENSMUSG00000026104	Stat1	TRUE	TRUE	TRUE
ENSMUSG00000026222	Sp100	TRUE	TRUE	TRUE
ENSMUSG00000026535	Ifi202b	TRUE	TRUE	TRUE
ENSMUSG00000026896	Ifih1	TRUE	TRUE	TRUE
ENSMUSG00000027580	Helz2	TRUE	TRUE	TRUE
ENSMUSG00000028037	Ifi44	TRUE	TRUE	TRUE
ENSMUSG00000028268	Gbp3	TRUE	TRUE	TRUE
ENSMUSG00000028270	Gbp2	TRUE	TRUE	TRUE
ENSMUSG00000029561	Oasl2	TRUE	TRUE	TRUE
ENSMUSG00000029605	Oas1b	TRUE	TRUE	TRUE
ENSMUSG00000030107	Usp18	TRUE	TRUE	TRUE
ENSMUSG00000030157	Clec2d	TRUE	TRUE	TRUE
ENSMUSG00000030921	Trim30a	TRUE	TRUE	TRUE
ENSMUSG00000030966	Trim21	TRUE	TRUE	TRUE
ENSMUSG00000031639	Tlr3	TRUE	TRUE	TRUE
ENSMUSG00000032690	Oas2	TRUE	TRUE	TRUE
ENSMUSG00000033355	Rtp4	TRUE	TRUE	TRUE
ENSMUSG00000034422	Parp14	TRUE	TRUE	TRUE
ENSMUSG00000034459	Ifit1	TRUE	TRUE	TRUE
ENSMUSG00000034855	Cxcl10	TRUE	TRUE	TRUE
ENSMUSG00000035692	Isg15	TRUE	TRUE	TRUE
ENSMUSG00000037921	Ddx60	TRUE	TRUE	TRUE
ENSMUSG00000038037	Socs1	TRUE	TRUE	TRUE
ENSMUSG00000039853	Trim14	TRUE	TRUE	TRUE
ENSMUSG00000040033	Stat2	TRUE	TRUE	TRUE
ENSMUSG00000040253	Gbp7	TRUE	TRUE	TRUE
ENSMUSG00000040264	Gbp2b	TRUE	TRUE	TRUE
ENSMUSG00000040296	Ddx58	TRUE	TRUE	TRUE
ENSMUSG00000040483	Xaf1	TRUE	TRUE	TRUE
ENSMUSG00000041827	Oasl1	TRUE	TRUE	TRUE
ENSMUSG00000046879	Irgm1	TRUE	TRUE	TRUE
ENSMUSG00000047735	Samd9l	TRUE	TRUE	TRUE
ENSMUSG00000049502	Dtx3l	TRUE	TRUE	TRUE
ENSMUSG00000053113	Socs3	TRUE	TRUE	TRUE
ENSMUSG00000054072	Iigp1	TRUE	TRUE	TRUE
ENSMUSG00000056144	Trim34a	TRUE	TRUE	TRUE
ENSMUSG00000060519	Tor3a	TRUE	TRUE	TRUE
ENSMUSG00000062488	Ifit3b	TRUE	TRUE	TRUE
ENSMUSG00000069874	Irgm2	TRUE	TRUE	TRUE
ENSMUSG00000070327	Rnf213	TRUE	TRUE	TRUE
ENSMUSG00000073555	Gm4951	TRUE	TRUE	TRUE
ENSMUSG00000074896	Ifit3	TRUE	TRUE	TRUE
ENSMUSG00000078853	Igtp	TRUE	TRUE	TRUE
ENSMUSG00000078920	Ifi47	TRUE	TRUE	TRUE
ENSMUSG00000078921	Tgtp2	TRUE	TRUE	TRUE
ENSMUSG00000079363	Gbp4	TRUE	TRUE	TRUE
ENSMUSG00000082292	NA	TRUE	TRUE	TRUE
ENSMUSG00000106734	NA	TRUE	TRUE	TRUE
ENSMUSG00000107215	NA	TRUE	TRUE	TRUE
ENSMUSG00000108068	NA	TRUE	TRUE	TRUE
ENSMUSG00000116639	NA	TRUE	TRUE	TRUE
ENSMUSG00000000275	Trim25	TRUE	TRUE	TRUE
ENSMUSG00000000409	Lck	TRUE	TRUE	TRUE
ENSMUSG00000001123	Lgals9	TRUE	TRUE	TRUE
ENSMUSG00000001166	Oas1c	TRUE	TRUE	TRUE
ENSMUSG00000001750	Tcirg1	TRUE	TRUE	TRUE
ENSMUSG00000002307	Daxx	TRUE	TRUE	TRUE
ENSMUSG00000010358	Ifi35	TRUE	TRUE	TRUE
ENSMUSG00000012519	Mlkl	TRUE	TRUE	TRUE
ENSMUSG00000016206	H2-M3	TRUE	TRUE	TRUE
ENSMUSG00000017830	Dhx58	TRUE	TRUE	TRUE
ENSMUSG00000020464	Pnpt1	TRUE	TRUE	TRUE
ENSMUSG00000021583	Erap1	TRUE	TRUE	TRUE
ENSMUSG00000022014	Epsti1	TRUE	TRUE	TRUE
ENSMUSG00000022216	Psme1	TRUE	TRUE	TRUE
ENSMUSG00000022587	Ly6e	TRUE	TRUE	TRUE
ENSMUSG00000022867	Usp25	TRUE	TRUE	TRUE
ENSMUSG00000024079	Eif2ak2	TRUE	TRUE	TRUE
ENSMUSG00000024308	Tapbp	TRUE	TRUE	TRUE
ENSMUSG00000024338	Psmb8	TRUE	TRUE	TRUE
ENSMUSG00000024339	Tap2	TRUE	TRUE	TRUE
ENSMUSG00000024371	C2	TRUE	TRUE	TRUE
ENSMUSG00000025324	Atp10a	TRUE	TRUE	TRUE
ENSMUSG00000025492	Ifitm3	TRUE	TRUE	TRUE
ENSMUSG00000026088	Mitd1	TRUE	TRUE	TRUE
ENSMUSG00000026466	Tor1aip1	TRUE	TRUE	TRUE
ENSMUSG00000026946	Nmi	TRUE	TRUE	TRUE
ENSMUSG00000027078	Ube2l6	TRUE	TRUE	TRUE
ENSMUSG00000027514	Zbp1	TRUE	TRUE	TRUE
ENSMUSG00000027951	Adar	TRUE	TRUE	TRUE
ENSMUSG00000029298	Gbp9	TRUE	TRUE	TRUE
ENSMUSG00000029798	Herc6	TRUE	TRUE	TRUE
ENSMUSG00000029826	Zc3hav1	TRUE	TRUE	TRUE
ENSMUSG00000031897	Psmb10	TRUE	TRUE	TRUE
ENSMUSG00000032265	Tent5a	TRUE	TRUE	TRUE
ENSMUSG00000032596	Uba7	TRUE	TRUE	TRUE
ENSMUSG00000032661	Oas3	TRUE	TRUE	TRUE
ENSMUSG00000033880	Lgals3bp	TRUE	TRUE	TRUE
ENSMUSG00000035517	Tdrd7	TRUE	TRUE	TRUE
ENSMUSG00000035929	H2-Q4	TRUE	TRUE	TRUE
ENSMUSG00000037321	Tap1	TRUE	TRUE	TRUE
ENSMUSG00000038507	Parp12	TRUE	TRUE	TRUE
ENSMUSG00000038774	Ascc3	TRUE	TRUE	TRUE
ENSMUSG00000038884	A230050P20Rik	TRUE	TRUE	TRUE
ENSMUSG00000039236	Isg20	TRUE	TRUE	TRUE
ENSMUSG00000039304	Tnfsf10	TRUE	TRUE	TRUE
ENSMUSG00000039501	Znfx1	TRUE	TRUE	TRUE
ENSMUSG00000039699	Batf2	TRUE	TRUE	TRUE
ENSMUSG00000040613	Apobec1	TRUE	TRUE	TRUE
ENSMUSG00000045932	Ifit2	TRUE	TRUE	TRUE
ENSMUSG00000046718	Bst2	TRUE	TRUE	TRUE
ENSMUSG00000046805	Mpeg1	TRUE	TRUE	TRUE
ENSMUSG00000050565	Tor1aip2	TRUE	TRUE	TRUE
ENSMUSG00000052776	Oas1a	TRUE	TRUE	TRUE
ENSMUSG00000053835	H2-T24	TRUE	TRUE	TRUE
ENSMUSG00000054404	Slfn5	TRUE	TRUE	TRUE
ENSMUSG00000056116	H2-T22	TRUE	TRUE	TRUE
ENSMUSG00000057143	Trim12c	TRUE	TRUE	TRUE
ENSMUSG00000057346	Apol9a	TRUE	TRUE	TRUE
ENSMUSG00000057554	Lgals8	TRUE	TRUE	TRUE
ENSMUSG00000057596	Trim30d	TRUE	TRUE	TRUE
ENSMUSG00000060802	B2m	TRUE	TRUE	TRUE
ENSMUSG00000061232	H2-K1	TRUE	TRUE	TRUE
ENSMUSG00000063268	Parp10	TRUE	TRUE	TRUE
ENSMUSG00000066861	Oas1g	TRUE	TRUE	TRUE
ENSMUSG00000067212	H2-T23	TRUE	TRUE	TRUE
ENSMUSG00000067297	Ifit1bl2	TRUE	TRUE	TRUE
ENSMUSG00000068246	Apol9b	TRUE	TRUE	TRUE
ENSMUSG00000069793	Slfn9	TRUE	TRUE	TRUE
ENSMUSG00000073144	4930599N23Rik	TRUE	TRUE	TRUE
ENSMUSG00000073411	H2-D1	TRUE	TRUE	TRUE
ENSMUSG00000074151	Nlrc5	TRUE	TRUE	TRUE
ENSMUSG00000075602	Ly6a	TRUE	TRUE	TRUE
ENSMUSG00000078349	NA	TRUE	TRUE	TRUE
ENSMUSG00000078922	Tgtp1	TRUE	TRUE	TRUE
ENSMUSG00000079197	Psme2	TRUE	TRUE	TRUE
ENSMUSG00000079491	H2-T10	TRUE	TRUE	TRUE
ENSMUSG00000090215	Trim34b	TRUE	TRUE	TRUE
ENSMUSG00000091549	NA	TRUE	TRUE	TRUE
ENSMUSG00000096727	Psmb9	TRUE	TRUE	TRUE
ENSMUSG00000097006	9530082P21Rik	TRUE	TRUE	TRUE
ENSMUSG00000097572	NA	TRUE	TRUE	TRUE
ENSMUSG00000109729	NA	TRUE	TRUE	TRUE
ENSMUSG00000111118	NA	TRUE	TRUE	TRUE
ENSMUSG00000024235	Map3k8	TRUE	TRUE	FALSE
ENSMUSG00000062007	Hsh2d	TRUE	TRUE	FALSE
ENSMUSG00000032698	Lmo2	TRUE	TRUE	FALSE
ENSMUSG00000090125	Pou3f1	TRUE	TRUE	FALSE
ENSMUSG00000091144	Phf11c	TRUE	TRUE	FALSE
ENSMUSG00000039697	Ncoa7	TRUE	TRUE	FALSE
ENSMUSG00000036249	Rbm43	TRUE	TRUE	FALSE
ENSMUSG00000072244	Trim6	TRUE	TRUE	FALSE
ENSMUSG00000032508	Myd88	TRUE	TRUE	FALSE
ENSMUSG00000009035	Tmem184b	TRUE	TRUE	FALSE
ENSMUSG00000036461	Elf1	TRUE	TRUE	FALSE
ENSMUSG00000028954	Nub1	TRUE	TRUE	FALSE
ENSMUSG00000049401	Ogfr	TRUE	TRUE	FALSE
ENSMUSG00000041645	Ddx24	TRUE	TRUE	FALSE
ENSMUSG00000025743	Sdc3	TRUE	TRUE	FALSE
ENSMUSG00000087477	NA	TRUE	FALSE	FALSE
ENSMUSG00000052837	Junb	TRUE	FALSE	FALSE
ENSMUSG00000064215	Ifi27	TRUE	FALSE	FALSE
ENSMUSG00000043279	Trim56	TRUE	FALSE	FALSE
ENSMUSG00000073929	Trim30e-ps1	TRUE	FALSE	FALSE
ENSMUSG00000099469	NA	TRUE	FALSE	FALSE
ENSMUSG00000091199	NA	TRUE	FALSE	FALSE
ENSMUSG00000000204	Slfn4	TRUE	FALSE	FALSE
ENSMUSG00000032128	Robo3	TRUE	FALSE	FALSE
ENSMUSG00000037034	Pax1	TRUE	FALSE	FALSE
ENSMUSG00000020297	Nsg2	TRUE	FALSE	FALSE
ENSMUSG00000022245	Skor1	TRUE	FALSE	FALSE
ENSMUSG00000032420	Nt5e	TRUE	FALSE	FALSE
ENSMUSG00000048782	Insc	TRUE	FALSE	FALSE
ENSMUSG00000048988	Elfn1	TRUE	FALSE	FALSE
ENSMUSG00000000184	Ccnd2	TRUE	FALSE	FALSE
ENSMUSG00000047631	Apof	TRUE	FALSE	FALSE
ENSMUSG00000038623	Tm6sf1	TRUE	FALSE	FALSE
ENSMUSG00000025647	Shisa5	TRUE	FALSE	FALSE
ENSMUSG00000108072	Gm20362	TRUE	FALSE	FALSE
ENSMUSG00000037580	Gch1	TRUE	FALSE	FALSE
ENSMUSG00000028435	Aqp3	TRUE	FALSE	FALSE
ENSMUSG00000019461	Plscr3	TRUE	FALSE	FALSE
ENSMUSG00000097768	NA	TRUE	FALSE	FALSE
ENSMUSG00000022564	Grina	TRUE	FALSE	FALSE
ENSMUSG00000043496	Tril	TRUE	FALSE	FALSE
ENSMUSG00000023931	Efhb	TRUE	FALSE	FALSE
ENSMUSG00000032623	Oas1d	TRUE	FALSE	FALSE
ENSMUSG00000069041	Slc25a31	TRUE	FALSE	FALSE
ENSMUSG00000027959	Sass6	TRUE	FALSE	FALSE
ENSMUSG00000031990	Jam3	TRUE	FALSE	FALSE
ENSMUSG00000079042	Apela	TRUE	FALSE	FALSE
ENSMUSG00000038855	Itpkb	TRUE	FALSE	FALSE

## Sheet: TPMs_ISGs_ESCs
gene_id	transcript_id.s.	length	effective_length	ESC_Rep1_0h	ESC_Rep1_1h	ESC_Rep1_6h	ESC_Rep2_0h	ESC_Rep2_1h	ESC_Rep2_6h	ESC_Rep3_0h	ESC_Rep3_1h	ESC_Rep3_6h	ESC_Rep4_0h	ESC_Rep4_1h	ESC_Rep4_6h
ENSMUSG00000000001	ENSMUST00000000001	3262	3212	18.7	17.61	16.56	18.51	17.35	17.02	45.21	59.86	51.24	35.38	41.64	30.84
ENSMUSG00000000003	ENSMUST00000000003,ENSMUST00000114041	799.5	749.5	0	0	0	0.03	0	0.02	0	0.14	0	0	0	0
ENSMUSG00000000028	ENSMUST00000000028,ENSMUST00000096990,ENSMUST00000115585,ENSMUST00000231819	1902.69	1852.69	14.16	13.65	13.3	15.2	12.38	12.8	34.84	35.4	35.49	24.12	33.32	20.01
ENSMUSG00000000031	ENSMUST00000132294,ENSMUST00000136359,ENSMUST00000140716,ENSMUST00000149974,ENSMUST00000152754,ENSMUST00000228259,ENSMUST00000228514	1380.51	1330.51	1.34	0.96	0.62	0.82	1.03	1.01	6.76	7.57	7.26	5.42	6.46	4.29
ENSMUSG00000000037	ENSMUST00000019101,ENSMUST00000074802,ENSMUST00000077375,ENSMUST00000087090,ENSMUST00000101113,ENSMUST00000112345,ENSMUST00000124775	3296.66	3246.66	1.64	1.56	1.38	1.89	1.47	1.28	2.49	5.93	3.91	2.43	2.61	2.04
ENSMUSG00000000049	ENSMUST00000000049,ENSMUST00000133383,ENSMUST00000146050,ENSMUST00000152958	665.5	615.5	0	0.01	0	0	0	0.05	0	0	0	0	0	0.02
ENSMUSG00000000056	ENSMUST00000103015,ENSMUST00000151088,ENSMUST00000154047	2957.8	2907.8	4.5	3.24	4.69	4.67	3.16	4.5	8.28	12.52	4.73	9.21	8.35	2.28
ENSMUSG00000000058	ENSMUST00000000058,ENSMUST00000115459,ENSMUST00000115462	2626	2576	0.03	0.05	0.02	0.03	0.02	0.02	0.15	0.14	0.14	0.15	0.17	0.04
ENSMUSG00000000078	ENSMUST00000000080,ENSMUST00000221734,ENSMUST00000222857	3015.58	2965.58	7.48	5.96	7.48	6.98	6.25	7.65	21.28	36.96	26.69	14.99	27.97	15.09
ENSMUSG00000000085	ENSMUST00000000087,ENSMUST00000064991,ENSMUST00000106298,ENSMUST00000106301,ENSMUST00000122860,ENSMUST00000132116,ENSMUST00000133169,ENSMUST00000133290,ENSMUST00000134375,ENSMUST00000136801,ENSMUST00000144555,ENSMUST00000144862,ENSMUST00000151345,ENSMUST00000153099	1575.71	1525.71	0.9	0.65	0.84	0.76	1.01	0.94	4.53	5.81	2.92	3.27	3.19	2.25
ENSMUSG00000000088	ENSMUST00000000090,ENSMUST00000213678,ENSMUST00000214154	662.87	612.87	104.88	86.15	110	94.87	86.52	105.8	340.11	301.9	358.33	228.47	305.84	232.14
ENSMUSG00000000093	ENSMUST00000000095	3626	3576	0.1	0.04	0.07	0.06	0.06	0.08	0.28	0.42	0.12	0.17	0.26	0.05
ENSMUSG00000000094	ENSMUST00000000096,ENSMUST00000108045,ENSMUST00000108047	3011	2961	0.04	0.05	0.06	0.02	0.06	0.03	0.29	0.27	0.17	0.16	0.22	0.11
ENSMUSG00000000103	ENSMUST00000115891,ENSMUST00000187148	2816	2766	0.14	0.1	0.09	0.07	0.13	0.1	0.08	0.24	0.08	0.21	0.1	0.07
ENSMUSG00000000120	ENSMUST00000000122	3446	3396	1.67	1.23	1.43	1.73	1.46	1.57	4.35	3.01	3.66	2.5	2.85	2.53
ENSMUSG00000000125	ENSMUST00000000127	3076	3026	0.01	0.02	0.02	0.01	0.01	0.03	0.2	0.07	0.19	0.09	0.14	0.09
ENSMUSG00000000126	ENSMUST00000000128,ENSMUST00000108783	3318.11	3268.11	0.08	0.06	0.08	0.1	0.08	0.09	0.28	0.13	0.22	0.19	0.1	0.11
ENSMUSG00000000127	ENSMUST00000000129,ENSMUST00000038080	2966.99	2916.99	4.56	4.03	4.32	4.98	3.85	4.51	15.17	24.67	14.76	11.44	14.26	8.87
ENSMUSG00000000131	ENSMUST00000009344,ENSMUST00000163959,ENSMUST00000164741,ENSMUST00000165608,ENSMUST00000165660,ENSMUST00000166368,ENSMUST00000166538,ENSMUST00000166540,ENSMUST00000166719,ENSMUST00000167147,ENSMUST00000167268,ENSMUST00000167315,ENSMUST00000168189,ENSMUST00000168564,ENSMUST00000168649,ENSMUST00000168933,ENSMUST00000169059,ENSMUST00000170675,ENSMUST00000171861,ENSMUST00000206784	3117.6	3067.6	10.5	10.44	14.3	11.91	9.77	13.89	51.55	76.39	57.11	30.4	45.39	36.38
ENSMUSG00000000134	ENSMUST00000077680,ENSMUST00000079542,ENSMUST00000101695,ENSMUST00000115677,ENSMUST00000115678,ENSMUST00000115679,ENSMUST00000115680,ENSMUST00000126694,ENSMUST00000132209,ENSMUST00000133456,ENSMUST00000137467,ENSMUST00000143680,ENSMUST00000144715,ENSMUST00000144900	3193.45	3143.45	3.33	3.27	4.19	3.5	3.49	4.28	17.83	29.94	17.25	12.48	19.85	10.6
ENSMUSG00000000142	ENSMUST00000052915,ENSMUST00000106711,ENSMUST00000139682,ENSMUST00000140821,ENSMUST00000144130,ENSMUST00000144511,ENSMUST00000152909	3056.28	3006.28	0.65	0.64	0.93	1.16	0.72	0.89	2.6	3.05	2.53	2.48	1.96	1.01
ENSMUSG00000000148	ENSMUST00000041588,ENSMUST00000100505,ENSMUST00000110806,ENSMUST00000124892,ENSMUST00000131905,ENSMUST00000153440	3302.97	3252.97	2.49	2.2	3.05	2.89	2.43	2.57	8.02	8.84	10.03	5.23	6.24	5.65
ENSMUSG00000000149	ENSMUST00000000153,ENSMUST00000198447	3199.45	3149.45	6.51	5.5	6.1	6.75	5.23	6.14	15.3	15.71	13.5	10.08	13.38	8.57
ENSMUSG00000000154	ENSMUST00000052348,ENSMUST00000105917,ENSMUST00000141988,ENSMUST00000145943,ENSMUST00000150791	1453.3	1403.3	0.59	0.44	0.81	0.54	0.34	0.72	1.58	1.62	1.41	1.23	1.7	0.63
ENSMUSG00000000157	ENSMUST00000000161,ENSMUST00000113773,ENSMUST00000131567,ENSMUST00000131777	2581	2531	0.04	0.01	0.04	0.06	0.03	0	0	0	0	0	0.01	0
ENSMUSG00000000159	ENSMUST00000000163,ENSMUST00000081093,ENSMUST00000113794,ENSMUST00000113795,ENSMUST00000136292,ENSMUST00000139595	1572.45	1522.45	0.06	0.01	0	0	0	0.05	0.02	0.27	0.06	0	0.02	0.03
ENSMUSG00000000167	ENSMUST00000000171,ENSMUST00000124029,ENSMUST00000125606,ENSMUST00000132187,ENSMUST00000141366,ENSMUST00000151197,ENSMUST00000155773	690.73	640.73	0.63	0.49	0.49	0.52	0.68	0.76	2.2	1.79	1.92	1.28	1.82	1.17
ENSMUSG00000000168	ENSMUST00000034567,ENSMUST00000125919,ENSMUST00000126933,ENSMUST00000132455,ENSMUST00000142275,ENSMUST00000155417	2071.56	2021.56	13.86	15.13	12.76	16.16	13.21	12.22	42.81	47.42	40.5	30.17	39.18	23.78
ENSMUSG00000000171	ENSMUST00000000175	1231	1181	30.06	28.99	27.83	31.89	27.34	29.45	71	62.35	80.56	48.35	62.06	49.46
ENSMUSG00000000182	ENSMUST00000000186	1814	1764	0.23	0.27	0.51	0.32	0.24	0.47	0.79	0.8	0.51	0.46	0.52	0.24
ENSMUSG00000000183	ENSMUST00000000187	4657	4607	0.01	0.02	0	0	0.01	0.01	0.02	0.04	0.01	0.02	0.02	0
ENSMUSG00000000184	ENSMUST00000000188,ENSMUST00000201066,ENSMUST00000201564,ENSMUST00000201637,ENSMUST00000201857,ENSMUST00000201902,ENSMUST00000201985,ENSMUST00000202363	3303.31	3253.31	0.39	0.51	4.73	0.5	0.88	3.94	1.84	1.92	11.51	1.49	2.04	8.25
ENSMUSG00000000194	ENSMUST00000056433,ENSMUST00000127872,ENSMUST00000133207,ENSMUST00000146747,ENSMUST00000147099,ENSMUST00000149622,ENSMUST00000151991,ENSMUST00000153032,ENSMUST00000169333,ENSMUST00000172422,ENSMUST00000194084	2428.7	2378.7	11.43	10.93	13.01	12.32	11.12	11.99	36.9	54.15	34.41	25.92	35.16	18.99
ENSMUSG00000000197	ENSMUST00000000201,ENSMUST00000226617,ENSMUST00000227541,ENSMUST00000227818,ENSMUST00000228766,ENSMUST00000228789,ENSMUST00000228860	4516.85	4466.85	0.28	0.19	0.16	0.23	0.24	0.25	0.98	1.82	0.72	0.85	0.75	0.49
ENSMUSG00000000202	ENSMUST00000000206,ENSMUST00000137965,ENSMUST00000141386,ENSMUST00000141481,ENSMUST00000146853,ENSMUST00000156053,ENSMUST00000156192	2246	2196	0.1	0.05	0.07	0.09	0.07	0.05	0.17	0.28	0.21	0.25	0.31	0.1
ENSMUSG00000000204	ENSMUST00000000208,ENSMUST00000167596,ENSMUST00000215472	3703	3653	0.05	0.07	0.32	0.02	0.03	0.24	0	0.1	1.24	0.01	0.07	0.89
ENSMUSG00000000214	ENSMUST00000000219,ENSMUST00000105929,ENSMUST00000123057,ENSMUST00000124951,ENSMUST00000138482,ENSMUST00000140344	1164.31	1114.31	0.08	0.04	0.08	0.03	0	0.03	0.03	0.1	0.05	0.03	0	0
ENSMUSG00000000215	ENSMUST00000000220,ENSMUST00000105930,ENSMUST00000105931,ENSMUST00000105932,ENSMUST00000105933,ENSMUST00000105934,ENSMUST00000125933,ENSMUST00000162317,ENSMUST00000210288	710.45	660.45	0.05	0.03	0.02	0.03	0	0.06	0.1	0.1	0	0	0.05	0.02
ENSMUSG00000000216	ENSMUST00000000221	2991	2941	0.02	0.01	0.01	0.02	0	0.02	0	0	0.01	0.02	0	0.01
ENSMUSG00000000223	ENSMUST00000000228,ENSMUST00000113224,ENSMUST00000113226,ENSMUST00000113228,ENSMUST00000142146,ENSMUST00000153424	5009.53	4959.53	0.08	0.07	0.12	0.07	0.07	0.12	0.18	0.27	0.32	0.16	0.15	0.22
ENSMUSG00000000244	ENSMUST00000009396,ENSMUST00000075172,ENSMUST00000082008,ENSMUST00000105923,ENSMUST00000105924,ENSMUST00000105925,ENSMUST00000141186,ENSMUST00000143512,ENSMUST00000145212,ENSMUST00000154264,ENSMUST00000207211,ENSMUST00000207449	1747.45	1697.45	1.16	1.18	1.54	1.22	1.25	1.43	2.44	2.36	1.81	1.69	1.96	1.26
ENSMUSG00000000247	ENSMUST00000000253,ENSMUST00000133661,ENSMUST00000143783,ENSMUST00000149664,ENSMUST00000155964,ENSMUST00000175896,ENSMUST00000176229	1695.61	1645.61	0.15	0.1	0.14	0.22	0.06	0.06	0.16	0.41	0.3	0.17	0.09	0.09
ENSMUSG00000000248	ENSMUST00000000254,ENSMUST00000075789,ENSMUST00000142388,ENSMUST00000146925,ENSMUST00000203405,ENSMUST00000204259	2404	2354	0.01	0.01	0	0.01	0.02	0.01	0.04	0.02	0	0.01	0.01	0
ENSMUSG00000000253	ENSMUST00000000260,ENSMUST00000128873,ENSMUST00000129176,ENSMUST00000222227	1396.44	1346.44	2.14	1.36	1.85	1.92	1.37	2.26	4.91	5.46	3.78	4.53	4.35	2.54
ENSMUSG00000000263	ENSMUST00000075603,ENSMUST00000102716,ENSMUST00000108853	2037	1987	0.01	0.02	0	0.01	0	0.02	0	0.06	0.02	0.01	0	0.02
ENSMUSG00000000266	ENSMUST00000112988,ENSMUST00000112990,ENSMUST00000112993,ENSMUST00000128809,ENSMUST00000140144	4942.57	4892.57	0.04	0.02	0.01	0.02	0.01	0.03	0.05	0.11	0.02	0.08	0.08	0.1
ENSMUSG00000000275	ENSMUST00000000284,ENSMUST00000100627,ENSMUST00000107896	5229.73	5179.73	5.08	8.49	14.22	5.4	9.89	15.08	22.16	53.75	43.44	15.16	44.54	31.93
ENSMUSG00000000276	ENSMUST00000000285,ENSMUST00000107894,ENSMUST00000152772	5853.23	5803.23	2.47	2.39	3.01	2.53	2.37	2.73	11.14	20.19	7.32	8.2	11.18	4.58
ENSMUSG00000000278	ENSMUST00000000287	2097	2047	18.64	16.65	22.01	19.12	17.29	23.15	65.5	56.47	52.42	40.88	49.57	31.62
ENSMUSG00000000282	ENSMUST00000000291,ENSMUST00000132150,ENSMUST00000133217	4590	4540	0.74	0.69	0.83	0.83	0.77	0.83	4.4	6.77	3.03	2.59	4.45	1.94
ENSMUSG00000000290	ENSMUST00000000299,ENSMUST00000130059,ENSMUST00000131023,ENSMUST00000153541,ENSMUST00000156644	2970	2920	0.03	0.01	0.03	0.03	0.1	0.05	0.08	0.08	0.07	0.03	0.15	0.05
ENSMUSG00000000295	ENSMUST00000000304,ENSMUST00000159194,ENSMUST00000159659,ENSMUST00000160447,ENSMUST00000162076	862.99	812.99	10.71	8.43	7.95	10.26	9.22	7.99	19.92	22.94	19.15	16.02	16.11	11.94
ENSMUSG00000000296	ENSMUST00000000305,ENSMUST00000213528,ENSMUST00000213639,ENSMUST00000214644,ENSMUST00000215515	1013.37	963.37	6.17	4.72	5.11	5.37	5.19	4.92	11.87	16.39	9.98	9.3	11.06	6.63
ENSMUSG00000000301	ENSMUST00000000310,ENSMUST00000102692,ENSMUST00000102693,ENSMUST00000133028,ENSMUST00000136660,ENSMUST00000143646,ENSMUST00000146461,ENSMUST00000147422,ENSMUST00000148512,ENSMUST00000150954	891.5	841.5	0.75	0.73	1.28	1.41	1.02	1.11	2.97	2.32	3.06	1.76	2.17	2.81
ENSMUSG00000000303	ENSMUST00000000312,ENSMUST00000136580,ENSMUST00000167688	4265.13	4215.13	12.82	9.5	13.4	13.28	11.69	13.95	62.58	60.29	57.05	43.02	51.99	39.81
ENSMUSG00000000305	ENSMUST00000000314,ENSMUST00000098996,ENSMUST00000108911,ENSMUST00000124708,ENSMUST00000129659,ENSMUST00000136411	3849.48	3799.48	0.44	0.26	0.48	0.55	0.28	0.34	1.59	1.78	2.06	1.18	1.51	0.77
ENSMUSG00000000308	ENSMUST00000000317,ENSMUST00000078222,ENSMUST00000125221,ENSMUST00000125812,ENSMUST00000126130,ENSMUST00000128612,ENSMUST00000129130,ENSMUST00000145380,ENSMUST00000150271,ENSMUST00000153040	1393.42	1343.42	3.21	2.96	5.98	3.81	3.18	4.59	13.95	10.93	14.64	9.01	11.06	8.25
ENSMUSG00000000317	ENSMUST00000000326,ENSMUST00000140542,ENSMUST00000153449	2875.98	2825.98	0.16	0.12	0.18	0.18	0.19	0.11	0.61	0.59	0.95	0.63	0.43	0.44
ENSMUSG00000000318	ENSMUST00000000327,ENSMUST00000102571,ENSMUST00000143298,ENSMUST00000144935,ENSMUST00000150966,ENSMUST00000152635,ENSMUST00000153959,ENSMUST00000178567,ENSMUST00000178945,ENSMUST00000180106	686.31	636.31	0.11	0.08	0	0	0	0.06	0.26	0.31	0.08	0	0.01	0
ENSMUSG00000000320	ENSMUST00000000329,ENSMUST00000108574	2528.66	2478.66	0.15	0.06	0.19	0.15	0.09	0.15	0.23	0.16	0.38	0.16	0.14	0.09
ENSMUSG00000000325	ENSMUST00000090103,ENSMUST00000115610,ENSMUST00000115612,ENSMUST00000115613,ENSMUST00000115614,ENSMUST00000126183,ENSMUST00000150253,ENSMUST00000150484,ENSMUST00000152132,ENSMUST00000155548,ENSMUST00000231791,ENSMUST00000232025,ENSMUST00000232241	2738.75	2688.75	11.61	10.08	11.68	12.84	10.1	12.34	35.76	35.27	28.92	27.73	26.35	19.04
ENSMUSG00000000326	ENSMUST00000000335,ENSMUST00000115609,ENSMUST00000147720,ENSMUST00000165430	1814.01	1764.01	2.56	2.07	2.39	2.13	2.11	3.09	11.58	10.57	11.09	7.14	8.38	6.4
ENSMUSG00000000339	ENSMUST00000000348,ENSMUST00000124486,ENSMUST00000140677,ENSMUST00000143425,ENSMUST00000153005	1569.82	1519.82	8.87	9.06	10.14	10.1	8.97	10.26	20.82	24.22	23.06	16.3	19.76	15.84
ENSMUSG00000000340	ENSMUST00000000349,ENSMUST00000196376,ENSMUST00000197201,ENSMUST00000199614	2873.42	2823.42	6.82	5.45	6.32	6.61	5.61	6.42	23.35	32.12	19.98	18.38	20.92	11.83
ENSMUSG00000000346	ENSMUST00000000356,ENSMUST00000229424,ENSMUST00000230384,ENSMUST00000230661	1798.26	1748.26	5.25	4.6	5.65	4.89	4.21	6.31	18.48	16.39	16.17	9.27	13.28	10.76
ENSMUSG00000000355	ENSMUST00000000365,ENSMUST00000133128,ENSMUST00000134573,ENSMUST00000140204,ENSMUST00000148938	753.98	703.98	13.45	11.69	12.97	12.9	12.18	12.61	33.38	41.68	37.77	26.57	32.99	23.46
ENSMUSG00000000359	ENSMUST00000000369,ENSMUST00000139370,ENSMUST00000150913	1663	1613	0.03	0.01	0.08	0.01	0	0.03	0.03	0.15	0.1	0.05	0.04	0.01
ENSMUSG00000000365	ENSMUST00000095793,ENSMUST00000223627,ENSMUST00000223646,ENSMUST00000225361,ENSMUST00000225621,ENSMUST00000225737	2021.75	1971.75	25.05	22.81	20.86	25.75	23.17	19.9	53.44	83.43	53.11	43.18	50.7	34.31
ENSMUSG00000000374	ENSMUST00000000384,ENSMUST00000217858,ENSMUST00000217980,ENSMUST00000218124,ENSMUST00000219948	4329.41	4279.41	3.68	3.47	3.73	4.12	3.66	3.98	11.54	15.32	11.61	7.52	10.46	7.64
ENSMUSG00000000378	ENSMUST00000000388,ENSMUST00000109721,ENSMUST00000109722,ENSMUST00000144293,ENSMUST00000159007,ENSMUST00000160633,ENSMUST00000161501,ENSMUST00000161667	1716.17	1666.17	2.58	2.42	2.73	2.27	2.63	2.37	6.03	8.34	6.9	4.51	5.26	4.78
ENSMUSG00000000381	ENSMUST00000102910,ENSMUST00000127341,ENSMUST00000141868	659.33	609.33	0	0	0.05	0.03	0.02	0	0	0	0	0	0.03	0
ENSMUSG00000000384	ENSMUST00000000394,ENSMUST00000131313,ENSMUST00000131477,ENSMUST00000131815,ENSMUST00000132446,ENSMUST00000134016,ENSMUST00000136682,ENSMUST00000144463,ENSMUST00000150697,ENSMUST00000151008,ENSMUST00000156969,ENSMUST00000189268	1445.62	1395.62	12.44	11.73	15.14	14.33	11.76	14.61	56.24	80.14	63.83	37.93	59.88	40.86
ENSMUSG00000000385	ENSMUST00000000395,ENSMUST00000231544,ENSMUST00000231715,ENSMUST00000231908,ENSMUST00000232141,ENSMUST00000232599	732	682	0.05	0.01	0.03	0.01	0.02	0.02	0.08	0.09	0.09	0.08	0.16	0.08
ENSMUSG00000000386	ENSMUST00000023655,ENSMUST00000113768,ENSMUST00000135184,ENSMUST00000142883,ENSMUST00000155233,ENSMUST00000231455,ENSMUST00000231461,ENSMUST00000231995,ENSMUST00000232193,ENSMUST00000232282	2967	2917	0.01	0.29	3.4	0.02	0.3	2.31	0.08	1.16	6.76	0.04	0.27	4.88
ENSMUSG00000000392	ENSMUST00000000402,ENSMUST00000102732,ENSMUST00000128139,ENSMUST00000136297,ENSMUST00000152085,ENSMUST00000172676,ENSMUST00000173745,ENSMUST00000174234,ENSMUST00000174448	2343	2293	0.01	0.01	0.05	0.12	0.01	0.06	0	0	0.24	0	0	0.2
ENSMUSG00000000394	ENSMUST00000102733,ENSMUST00000136686,ENSMUST00000155624	836.33	786.33	0	0	0.03	0	0	0.02	0	0	0	0	0	0
ENSMUSG00000000399	ENSMUST00000088194,ENSMUST00000200890,ENSMUST00000205002	1290.75	1240.75	43.34	40.9	42.69	45.54	39.73	41.4	104.17	114.53	126.74	71.84	98.62	73.68
ENSMUSG00000000402	ENSMUST00000000412	2704	2654	0.29	0.24	0.23	0.23	0.29	0.27	0.72	0.66	0.42	0.6	0.71	0.38
ENSMUSG00000000409	ENSMUST00000067240,ENSMUST00000102596,ENSMUST00000123640,ENSMUST00000127943,ENSMUST00000132030,ENSMUST00000134336,ENSMUST00000139957,ENSMUST00000167288	1425.23	1375.23	2.97	3.42	6.33	3.91	3.98	5.89	9.86	15.36	24.01	4.92	12.21	13.97
ENSMUSG00000000411	ENSMUST00000000421	1280	1230	0.01	0.01	0.02	0	0	0.05	0.04	0.18	0.02	0.06	0.07	0
ENSMUSG00000000416	ENSMUST00000090601,ENSMUST00000129669,ENSMUST00000139557,ENSMUST00000140416,ENSMUST00000141581,ENSMUST00000142963,ENSMUST00000146775,ENSMUST00000148602,ENSMUST00000152499	2350.89	2300.89	0.15	0.07	0.1	0.3	0.06	0.12	0.21	1.34	0.33	0.35	0.5	0.2
ENSMUSG00000000420	ENSMUST00000000430,ENSMUST00000164066,ENSMUST00000164998,ENSMUST00000169474,ENSMUST00000170191,ENSMUST00000170243,ENSMUST00000171583,ENSMUST00000178605	3127.5	3077.5	7.86	7.16	6.79	8.12	7.24	7.49	27.93	37.25	29.69	23.33	27.21	18.41
ENSMUSG00000000435	ENSMUST00000000445	2083	2033	0	0.01	0	0.01	0.01	0	0	0	0.01	0	0	0.03
ENSMUSG00000000439	ENSMUST00000000449,ENSMUST00000204409,ENSMUST00000205248	2549.62	2499.62	10.52	9.01	8.01	9.35	9.03	8.37	18.37	19.54	17.69	12.34	19.35	10.2
ENSMUSG00000000440	ENSMUST00000000450,ENSMUST00000171644,ENSMUST00000203308,ENSMUST00000203732,ENSMUST00000203896,ENSMUST00000204305,ENSMUST00000205213	1168.29	1118.29	0	0.05	0.01	0.04	0.14	0	0.03	0.18	0.02	0.03	0.11	0.02
ENSMUSG00000000441	ENSMUST00000000451,ENSMUST00000112949,ENSMUST00000124553,ENSMUST00000127503,ENSMUST00000130528,ENSMUST00000147979,ENSMUST00000203142,ENSMUST00000203276,ENSMUST00000203759,ENSMUST00000203826,ENSMUST00000204512	2804.75	2754.75	27.43	25.53	27.01	30.75	26.26	26.17	82.79	135.1	99.25	64.63	88	60.16
ENSMUSG00000000486	ENSMUST00000106313,ENSMUST00000106314,ENSMUST00000131208,ENSMUST00000133591,ENSMUST00000133733,ENSMUST00000133913,ENSMUST00000138541,ENSMUST00000142356,ENSMUST00000152267,ENSMUST00000205570	1007.94	957.94	56.92	50.88	66.11	57.4	51.66	64.63	135.65	133.88	119.86	97.97	96.27	78.52
ENSMUSG00000000489	ENSMUST00000000500,ENSMUST00000229168,ENSMUST00000229795,ENSMUST00000229912	2531.29	2481.29	0.47	0.33	0.43	0.65	0.54	0.51	2.2	3.52	1.57	1.35	2.76	1.17
ENSMUSG00000000530	ENSMUST00000000542,ENSMUST00000117984,ENSMUST00000119063,ENSMUST00000120028,ENSMUST00000120754,ENSMUST00000121718,ENSMUST00000124151,ENSMUST00000128525,ENSMUST00000128868,ENSMUST00000130432,ENSMUST00000144229	2192.8	2142.8	0.18	0.08	0.12	0.3	0.06	0.18	0.34	0.45	0.41	0.36	0.36	0.18
ENSMUSG00000000531	ENSMUST00000000543	2033	1983	1.66	1.36	1.9	1.86	1.32	1.91	3.37	2.39	3.08	2.19	2.07	1.97
ENSMUSG00000000532	ENSMUST00000000544	4418	4368	4.65	3.98	4.9	5.13	4.03	4.53	13.84	13.42	10.89	10.1	10.9	6.73
ENSMUSG00000000538	ENSMUST00000064019,ENSMUST00000093046,ENSMUST00000093048,ENSMUST00000095254,ENSMUST00000102682,ENSMUST00000102683,ENSMUST00000133420,ENSMUST00000142225,ENSMUST00000143124,ENSMUST00000151284,ENSMUST00000153920	4281.36	4231.36	0.99	1.32	1.44	1.39	1.05	1.64	5.09	6.83	4.34	2.98	3.56	2.47
ENSMUSG00000000544	ENSMUST00000027847,ENSMUST00000060833,ENSMUST00000166159,ENSMUST00000166860	2109.48	2059.48	12.29	12.21	16.44	14.02	12.4	15.53	38.93	42.82	47.76	26.01	32.78	27.53
ENSMUSG00000000552	ENSMUST00000168828,ENSMUST00000229373,ENSMUST00000229551	2273.22	2223.22	0.3	0.43	0.51	0.37	0.34	0.46	1.59	1.74	1.42	0.9	0.97	0.86
ENSMUSG00000000555	ENSMUST00000023128,ENSMUST00000215331,ENSMUST00000230460,ENSMUST00000230775	3746.02	3696.02	1.11	0.89	1.52	1.4	1.3	1.46	6.91	8.83	6.55	5.5	6.87	3.92
ENSMUSG00000000560	ENSMUST00000000572,ENSMUST00000197124,ENSMUST00000197284,ENSMUST00000198625,ENSMUST00000199012,ENSMUST00000199861	5852	5802	0.01	0.01	0.02	0.01	0.03	0.02	0	0.16	0.01	0.01	0.01	0.01
ENSMUSG00000000561	ENSMUST00000010278,ENSMUST00000127464,ENSMUST00000128005,ENSMUST00000130994,ENSMUST00000151263	2238.08	2188.08	25.42	23.1	24.44	25.27	22.49	26.76	74.93	104.42	90.4	53.27	75.07	47.82
ENSMUSG00000000562	ENSMUST00000000574,ENSMUST00000164730,ENSMUST00000197613	1524.75	1474.75	0.05	0.05	0	0.02	0.01	0.01	0.01	0.03	0	0.05	0.05	0
ENSMUSG00000000563	ENSMUST00000118209,ENSMUST00000123959,ENSMUST00000133320,ENSMUST00000143022,ENSMUST00000153666,ENSMUST00000199311	1101.62	1051.62	89.36	83.83	84.61	97.47	83.85	87.45	220.09	230.68	264.47	159.38	212.27	161.22
ENSMUSG00000000567	ENSMUST00000000579	4135	4085	0	0	0	0	0	0.01	0.04	0.02	0.02	0.01	0.03	0
ENSMUSG00000000568	ENSMUST00000019128,ENSMUST00000072750,ENSMUST00000112939,ENSMUST00000164833,ENSMUST00000168396,ENSMUST00000170654,ENSMUST00000170912,ENSMUST00000171106,ENSMUST00000171640,ENSMUST00000171786,ENSMUST00000172361	1379.06	1329.06	20.28	16.73	27.45	23.4	21	25.57	103.52	98.21	101.02	79.39	103.57	78.35
ENSMUSG00000000579	ENSMUST00000092966,ENSMUST00000124894,ENSMUST00000138598,ENSMUST00000149027	789.19	739.19	7.67	6.62	7.99	8.35	6.08	7.22	27.43	31.9	27.82	20.75	18.08	17.57
ENSMUSG00000000581	ENSMUST00000000594,ENSMUST00000130330,ENSMUST00000131227,ENSMUST00000135568,ENSMUST00000156784	1241.97	1191.97	11.74	10.05	10.86	10.76	11.31	10.23	23.47	37.22	30.19	17.15	23.11	15.4
ENSMUSG00000000594	ENSMUST00000000608	4127	4077	4.46	3.47	4.52	4.37	3.64	4.67	9.11	5.37	3.88	5.43	6.16	2.83
ENSMUSG00000000600	ENSMUST00000080085,ENSMUST00000171023,ENSMUST00000196098,ENSMUST00000197611,ENSMUST00000197742,ENSMUST00000198079,ENSMUST00000199234,ENSMUST00000199475,ENSMUST00000199845,ENSMUST00000200004,ENSMUST00000200386,ENSMUST00000200577	3019.7	2969.7	7.59	7.18	6.9	7.29	7.19	6.82	20.95	46.33	25.57	17.83	22.85	14.03
ENSMUSG00000000605	ENSMUST00000000619,ENSMUST00000209916,ENSMUST00000210061,ENSMUST00000210362,ENSMUST00000210444,ENSMUST00000210594,ENSMUST00000210809,ENSMUST00000210989,ENSMUST00000211551,ENSMUST00000211574	4315.58	4265.58	0.53	0.45	0.74	0.62	0.6	0.56	2.54	3.7	2.74	1.99	2.35	1.72
ENSMUSG00000000606	ENSMUST00000022438,ENSMUST00000159674,ENSMUST00000163019,ENSMUST00000228139	2918	2868	0	0.03	0	0.01	0.02	0.01	0.05	0	0	0.01	0	0.01
ENSMUSG00000000617	ENSMUST00000000631,ENSMUST00000126890,ENSMUST00000156890,ENSMUST00000171427	2448.43	2398.43	0.04	0.02	0.01	0.01	0.02	0.09	0.04	0.07	0	0.02	0.09	0.01
ENSMUSG00000000627	ENSMUST00000000641,ENSMUST00000125579,ENSMUST00000203271,ENSMUST00000203911	3944.07	3894.07	0.18	0.18	0.44	0.2	0.37	0.2	1.2	1.78	0.96	1.26	0.93	0.75
ENSMUSG00000000628	ENSMUST00000000642,ENSMUST00000168725,ENSMUST00000169270,ENSMUST00000170833	5383.97	5333.97	17.52	16.29	15.62	18.59	16.34	15.08	57.89	64.34	48.72	39.55	53.64	33.08
ENSMUSG00000000631	ENSMUST00000000645,ENSMUST00000092884,ENSMUST00000092887,ENSMUST00000100443,ENSMUST00000100794,ENSMUST00000100795,ENSMUST00000102488,ENSMUST00000108375,ENSMUST00000108376,ENSMUST00000130305,ENSMUST00000130627,ENSMUST00000130956,ENSMUST00000134196,ENSMUST00000135045,ENSMUST00000135375,ENSMUST00000142571,ENSMUST00000151373,ENSMUST00000154892,ENSMUST00000164315,ENSMUST00000164334,ENSMUST00000167856,…	4844.5	4794.5	3.77	3.56	5.1	3.89	4.04	5.08	15.91	22.4	17.93	12.82	15.24	13.82
ENSMUSG00000000632	ENSMUST00000000646,ENSMUST00000093995,ENSMUST00000126866,ENSMUST00000138346,ENSMUST00000138749,ENSMUST00000140630,ENSMUST00000142542,ENSMUST00000151982,ENSMUST00000155087	2348.26	2298.26	0.09	0.04	0.1	0.04	0.06	0.15	0.51	0.58	0.56	0.3	0.44	0.14
ENSMUSG00000000673	ENSMUST00000000687	1222	1172	0.06	0.07	0.03	0.03	0.04	0.03	0.04	0.11	0.05	0.02	0.02	0.01
ENSMUSG00000000682	ENSMUST00000000696,ENSMUST00000137445,ENSMUST00000145122	514	464	0.08	0.07	0	0	0.16	0.07	0.05	0.19	0.13	0	0.18	0.04
ENSMUSG00000000686	ENSMUST00000094004,ENSMUST00000145676,ENSMUST00000147386	2662	2612	0.06	0.06	0.11	0.12	0.09	0.05	0.19	0.82	0.15	0.11	0.29	0.1
ENSMUSG00000000690	ENSMUST00000000704,ENSMUST00000173432	1321	1271	0.04	0.01	0	0	0.01	0	0	0	0	0	0.02	0
ENSMUSG00000000693	ENSMUST00000000707,ENSMUST00000101257,ENSMUST00000152679,ENSMUST00000155502,ENSMUST00000204318	1645.07	1595.07	0.24	0.34	0.21	0.43	0.17	0.3	0.46	1.76	0.89	0.86	0.65	0.59
ENSMUSG00000000701	ENSMUST00000000717	1055	1005	0.1	0.02	0.02	0	0	0.02	0	0	0	0	0	0
ENSMUSG00000000706	ENSMUST00000041674,ENSMUST00000110434,ENSMUST00000225831	3423	3373	0.04	0.06	0.06	0.09	0.03	0.03	0.03	0.01	0.04	0.01	0.01	0.03
ENSMUSG00000000708	ENSMUST00000000724,ENSMUST00000163648,ENSMUST00000164390,ENSMUST00000166525,ENSMUST00000167092,ENSMUST00000171072,ENSMUST00000172160	2890.99	2840.99	17.69	16.41	19.74	18.67	17.11	21.22	32.66	45.93	53.48	23.99	35.23	33.17
ENSMUSG00000000711	ENSMUST00000000727,ENSMUST00000220593	3039.52	2989.52	12.37	11.01	12.75	13.41	10.81	11.69	34.72	33.55	32.01	23.96	26.62	19.75
ENSMUSG00000000724	ENSMUST00000078623,ENSMUST00000124178	1142	1092	0.05	0.04	0.03	0.05	0.01	0.03	0.17	0.26	0.02	0.07	0.1	0
ENSMUSG00000000730	ENSMUST00000000746,ENSMUST00000123940,ENSMUST00000131825,ENSMUST00000135316,ENSMUST00000138785,ENSMUST00000139539,ENSMUST00000144446,ENSMUST00000151242	1641.02	1591.02	98.32	90.82	104.84	100.41	91.57	102.72	220.99	218.99	231.44	143.85	193.76	142.17
ENSMUSG00000000731	ENSMUST00000019257,ENSMUST00000105395,ENSMUST00000105396,ENSMUST00000128241,ENSMUST00000130972,ENSMUST00000131028,ENSMUST00000140636,ENSMUST00000141255,ENSMUST00000143452,ENSMUST00000143548,ENSMUST00000143735,ENSMUST00000145975,ENSMUST00000148469,ENSMUST00000154374,ENSMUST00000155021,ENSMUST00000156417	1417.74	1367.74	13.34	12.64	13.11	16.77	11.21	12.67	33.31	49.6	7.14	26.14	32.73	4.26
ENSMUSG00000000732	ENSMUST00000105393,ENSMUST00000217675,ENSMUST00000219038,ENSMUST00000219633	2558.57	2508.57	2.53	2.73	3.52	2.89	2.81	3.28	12.07	31.3	7.89	9.26	17.03	4.51
ENSMUSG00000000738	ENSMUST00000108868,ENSMUST00000125975,ENSMUST00000128234,ENSMUST00000128803,ENSMUST00000130787,ENSMUST00000135991,ENSMUST00000142150,ENSMUST00000142541,ENSMUST00000149248,ENSMUST00000152972,ENSMUST00000153285,ENSMUST00000153492,ENSMUST00000212364	2093.28	2043.28	9.71	10.1	10.36	9.52	9.37	11.49	29.27	33.06	26.58	21.34	25.31	15.75
ENSMUSG00000000739	ENSMUST00000000755,ENSMUST00000122819,ENSMUST00000126951,ENSMUST00000137998,ENSMUST00000146007,ENSMUST00000152722	1417.73	1367.73	0.19	0.21	0.3	0.34	0.15	0.25	0.67	0.46	0.98	0.64	0.36	0.68
ENSMUSG00000000740	ENSMUST00000000756,ENSMUST00000129311,ENSMUST00000132275,ENSMUST00000152444,ENSMUST00000212887	787.81	737.81	277.87	251.67	269.2	251.89	251.86	247.27	685.66	629.9	844.19	472.34	637.94	489.82
ENSMUSG00000000743	ENSMUST00000000759,ENSMUST00000167655,ENSMUST00000172336,ENSMUST00000212107	1947.99	1897.99	14.64	12.83	13.12	15.86	13.51	13.04	30.14	31.49	35.24	23.29	33.59	22.56
ENSMUSG00000000751	ENSMUST00000000767,ENSMUST00000092907,ENSMUST00000135770,ENSMUST00000149365,ENSMUST00000154894	2784	2734	31.45	29	28.58	32.37	29.12	26.86	69.31	66.7	74.39	49.52	58.58	45
ENSMUSG00000000753	ENSMUST00000000769,ENSMUST00000125982,ENSMUST00000137103,ENSMUST00000138661,ENSMUST00000139403,ENSMUST00000155009,ENSMUST00000167281,ENSMUST00000168902	860.77	810.77	0.22	0.08	0.27	0.2	0.29	0.16	0.52	0.39	1.05	0.4	0.45	0.6
ENSMUSG00000000759	ENSMUST00000000776,ENSMUST00000164611,ENSMUST00000164774,ENSMUST00000164861,ENSMUST00000164971,ENSMUST00000165321,ENSMUST00000167547,ENSMUST00000168657,ENSMUST00000172056	3124.07	3074.07	4.57	4.49	5.06	4.76	4.25	4.48	15.31	19.3	16.61	10.28	15.45	10.94
ENSMUSG00000000766	ENSMUST00000000783,ENSMUST00000052751,ENSMUST00000056385,ENSMUST00000063036,ENSMUST00000078634,ENSMUST00000092729,ENSMUST00000092731,ENSMUST00000092734,ENSMUST00000105597,ENSMUST00000105601,ENSMUST00000105602,ENSMUST00000105603,ENSMUST00000105604,ENSMUST00000105605,ENSMUST00000105607,ENSMUST00000105611,ENSMUST00000105615,ENSMUST00000123861,ENSMUST00000129221,ENSMUST00000129954,ENSMUST00000133486,…	1834.21	1784.21	0.06	0.03	0.07	0.17	0.02	0.1	0	0.14	0	0.01	0	0.02
ENSMUSG00000000776	ENSMUST00000000793,ENSMUST00000180358,ENSMUST00000226523,ENSMUST00000226549,ENSMUST00000227748,ENSMUST00000227985	1532.26	1482.26	6.26	5.52	6.85	7.55	5.99	6.5	23.42	38.8	31.18	15.76	24.8	19.07
ENSMUSG00000000782	ENSMUST00000086844,ENSMUST00000109071	2354.4	2304.4	1.92	1.35	2.44	1.82	1.39	1.91	13.13	12.34	7.33	8.77	9.29	5.15
ENSMUSG00000000787	ENSMUST00000000804,ENSMUST00000123096,ENSMUST00000149639,ENSMUST00000153611,ENSMUST00000153851	3822.43	3772.43	65.93	61.13	60.61	68.98	63.55	62.45	198.93	178.07	214.47	139.67	206.63	156.4
ENSMUSG00000000791	ENSMUST00000000808,ENSMUST00000211936,ENSMUST00000212146,ENSMUST00000212251,ENSMUST00000212657,ENSMUST00000212826	2331.51	2281.51	0.27	0.11	0.22	0.15	0.11	0.17	0.39	0.15	0.32	0.29	0.21	0.23
ENSMUSG00000000792	ENSMUST00000000809	2928	2878	0.14	0.06	0.08	0.13	0.08	0.09	0.53	0.29	0.26	0.29	0.49	0.24
ENSMUSG00000000794	ENSMUST00000000811,ENSMUST00000124584	6098.65	6048.65	0.06	0.02	0.07	0.04	0.02	0.08	0.12	0.31	0.1	0.11	0.06	0.09
ENSMUSG00000000804	ENSMUST00000000821,ENSMUST00000108075,ENSMUST00000172515,ENSMUST00000172595,ENSMUST00000172950,ENSMUST00000173156,ENSMUST00000173271,ENSMUST00000174602,ENSMUST00000174809	4115.57	4065.57	4.1	2.88	3.93	4.18	3.31	3.61	12.9	20.36	9.29	9.93	10.71	6.19
ENSMUSG00000000805	ENSMUST00000103194,ENSMUST00000108076,ENSMUST00000127827,ENSMUST00000138331,ENSMUST00000139416,ENSMUST00000150596	987.75	937.75	0.21	0.06	0.17	0.35	0.23	0.14	4.09	1.92	2.53	2.36	3.61	2.34
ENSMUSG00000000811	ENSMUST00000000828,ENSMUST00000101171	2836	2786	2.28	2.12	1.84	2.44	1.9	2.02	6.45	7.05	5.09	4.56	5.93	3.13
ENSMUSG00000000817	ENSMUST00000000834,ENSMUST00000193648	1937	1887	0.03	0.01	0	0	0	0	0.03	0	0.02	0	0.01	0
ENSMUSG00000000823	ENSMUST00000108789,ENSMUST00000128553,ENSMUST00000131866,ENSMUST00000132538,ENSMUST00000133598,ENSMUST00000135561,ENSMUST00000140103,ENSMUST00000150552,ENSMUST00000153998,ENSMUST00000155947	3763.17	3713.17	3.53	3.59	5.26	4.17	3.38	4.28	23.05	43.33	23.51	15.43	23.71	13.91
ENSMUSG00000000826	ENSMUST00000072334,ENSMUST00000108796,ENSMUST00000108797,ENSMUST00000116365,ENSMUST00000141523,ENSMUST00000152578	3528.39	3478.39	7.23	7.31	6.99	7.5	6.38	6.67	19.67	26.19	21.39	14.63	16.65	11.45
ENSMUSG00000000827	ENSMUST00000000844,ENSMUST00000069712,ENSMUST00000108799,ENSMUST00000108800,ENSMUST00000129390,ENSMUST00000130261,ENSMUST00000141825,ENSMUST00000149163,ENSMUST00000155589,ENSMUST00000183956,ENSMUST00000184588,ENSMUST00000184849	1266.24	1216.24	29.98	26.89	26.8	30.37	26.22	25.9	71.3	75.86	75.86	50	69.31	46.65
ENSMUSG00000000838	ENSMUST00000088546,ENSMUST00000114653,ENSMUST00000114654,ENSMUST00000114655,ENSMUST00000114656,ENSMUST00000114657,ENSMUST00000127954,ENSMUST00000127993,ENSMUST00000133327,ENSMUST00000141728,ENSMUST00000142584,ENSMUST00000146177,ENSMUST00000148348	3336.99	3286.99	13	11.85	13.95	14.31	13.38	14.74	46.58	72.37	45.86	35.36	44.22	29.61
ENSMUSG00000000861	ENSMUST00000000881,ENSMUST00000109514,ENSMUST00000109516,ENSMUST00000118955,ENSMUST00000124148,ENSMUST00000127494	4275.35	4225.35	0.22	0.18	0.23	0.18	0.16	0.21	0.65	1.61	1.35	0.53	0.82	0.86
ENSMUSG00000000869	ENSMUST00000000889,ENSMUST00000127858,ENSMUST00000140684,ENSMUST00000150568	566.5	516.5	0	0	0	0.03	0	0.06	0.1	0.09	0.11	0.15	0	0
ENSMUSG00000000876	ENSMUST00000000896,ENSMUST00000109703	1813.89	1763.89	2.09	1.78	1.74	2.17	1.65	2	4.09	3.4	3.86	2.9	4.48	1.96
ENSMUSG00000000881	ENSMUST00000000901,ENSMUST00000087984,ENSMUST00000113735,ENSMUST00000113736,ENSMUST00000146772,ENSMUST00000147863,ENSMUST00000148076,ENSMUST00000151020	2455.02	2405.02	2.77	2.02	3.3	3.21	2.3	2.3	9.69	6.45	5.61	6.09	7.76	3.55
ENSMUSG00000000884	ENSMUST00000000904,ENSMUST00000090086,ENSMUST00000115600,ENSMUST00000115601,ENSMUST00000124924,ENSMUST00000129952,ENSMUST00000139625,ENSMUST00000147739,ENSMUST00000149035,ENSMUST00000151253,ENSMUST00000167778,ENSMUST00000231621,ENSMUST00000232235	1267.84	1217.84	3.18	2.73	2.87	2.99	3.03	3.16	8.37	9.3	8.65	5.86	7.14	4.88
ENSMUSG00000000889	ENSMUST00000000910,ENSMUST00000155290	2552	2502	0.01	0.01	0	0	0	0	0	0	0	0	0	0.03
ENSMUSG00000000901	ENSMUST00000000924,ENSMUST00000120281,ENSMUST00000132869,ENSMUST00000133897,ENSMUST00000152222,ENSMUST00000219728	2108.97	2058.97	5.01	4.98	5.37	5.25	5.46	5.42	16.63	16.44	13.2	10.99	13.37	7.22
ENSMUSG00000000902	ENSMUST00000000925,ENSMUST00000121304,ENSMUST00000133189,ENSMUST00000140388,ENSMUST00000140408,ENSMUST00000146555	1766.47	1716.47	14.25	12.13	14.63	16.73	13.01	14.98	39.22	36.27	39.64	23.53	34.16	25.52
ENSMUSG00000000903	ENSMUST00000000926,ENSMUST00000121151	729	679	0.18	0.32	0.18	0.2	0.13	0.36	0.29	0.38	0.31	0.07	0.29	0.13
ENSMUSG00000000915	ENSMUST00000000939,ENSMUST00000166258,ENSMUST00000166684,ENSMUST00000167325,ENSMUST00000167879,ENSMUST00000171407,ENSMUST00000198664	3378.38	3328.38	4.14	3.25	5	5.06	3.67	4.11	13.87	16.12	10.27	9.82	11.27	5.98
ENSMUSG00000000916	ENSMUST00000000940,ENSMUST00000124453,ENSMUST00000126454,ENSMUST00000127746,ENSMUST00000131863,ENSMUST00000141867,ENSMUST00000170342,ENSMUST00000202422,ENSMUST00000202792	1159.91	1109.91	8.6	7.36	7.64	8.18	8.95	8.42	21.14	22.95	23.74	17	20.69	15.36
ENSMUSG00000000934	ENSMUST00000000958,ENSMUST00000230469,ENSMUST00000230774	1902.47	1852.47	1.94	1.74	1.68	1.93	1.67	1.97	6.19	6.39	5.56	4.36	4.77	3.22
ENSMUSG00000000938	ENSMUST00000121043,ENSMUST00000125581,ENSMUST00000126402,ENSMUST00000142611	1436	1386	0.05	0.01	0.02	0.04	0.04	0.02	0	0.03	0.03	0.05	0.11	0.02
ENSMUSG00000000942	ENSMUST00000101395	1594	1544	0.02	0.01	0.01	0	0.01	0.03	0.02	0	0	0.05	0.02	0
ENSMUSG00000000948	ENSMUST00000179360,ENSMUST00000189432,ENSMUST00000191456,ENSMUST00000191491	1978.62	1928.62	26.16	26.7	32.16	27.8	30.85	28.51	77.69	146.78	70.59	64.29	83.19	43.48
ENSMUSG00000000957	ENSMUST00000089688,ENSMUST00000196155,ENSMUST00000197874,ENSMUST00000197947,ENSMUST00000198679,ENSMUST00000225641,ENSMUST00000226710	2528.23	2478.23	2.31	2.3	2.81	2.57	2.11	2.62	9.01	6.58	9.92	6.6	7.44	4.77
ENSMUSG00000000958	ENSMUST00000000984,ENSMUST00000195970,ENSMUST00000195999,ENSMUST00000196215,ENSMUST00000196966,ENSMUST00000197440,ENSMUST00000197667,ENSMUST00000200545,ENSMUST00000226753,ENSMUST00000227334,ENSMUST00000227967,ENSMUST00000228488	1651.95	1601.95	10.03	10.8	11.87	11.31	10.64	10.86	28.74	45.07	33.91	19.05	29.99	21.44
ENSMUSG00000000959	ENSMUST00000000985,ENSMUST00000196882,ENSMUST00000198107,ENSMUST00000228567,ENSMUST00000228719	1321.05	1271.05	12.72	11.45	14.78	12.19	10.31	14.93	39.58	43.84	35.36	27.3	35.99	21.43
ENSMUSG00000000976	ENSMUST00000001002,ENSMUST00000125602,ENSMUST00000125831,ENSMUST00000127428,ENSMUST00000136572	3247.79	3197.79	2.32	1.46	2.2	2.11	1.5	1.69	6.44	10.36	7.73	5.66	6.44	5.01
ENSMUSG00000000982	ENSMUST00000001008	766	716	0	0	0	0.05	0.02	0	0	0.12	0	0	0	0
ENSMUSG00000000983	ENSMUST00000001009,ENSMUST00000135654,ENSMUST00000139762	657.33	607.33	0	0	0	0	0.02	0.02	0.03	0.19	0	0	0	0
ENSMUSG00000001014	ENSMUST00000001040,ENSMUST00000215077	1028	978	0.59	0.45	0.51	0.52	0.48	0.44	0.99	0.24	0.38	1.01	1.09	0.57
ENSMUSG00000001016	ENSMUST00000001042,ENSMUST00000196769,ENSMUST00000197644,ENSMUST00000198325,ENSMUST00000198641,ENSMUST00000198738	1746.28	1696.28	37.21	36.01	35.34	38.83	34.93	36.46	97.19	103.64	110.12	68.18	90.69	64.64
ENSMUSG00000001017	ENSMUST00000001043,ENSMUST00000049937,ENSMUST00000076639,ENSMUST00000107342,ENSMUST00000107343,ENSMUST00000107344,ENSMUST00000107346,ENSMUST00000131868,ENSMUST00000146740	2125.43	2075.43	28.59	26.14	30.03	30.1	27.22	28.51	74.87	89.21	95.75	53.06	68.01	58.92
ENSMUSG00000001018	ENSMUST00000107351,ENSMUST00000107352,ENSMUST00000149884,ENSMUST00000184877,ENSMUST00000185005	1474.34	1424.34	10.15	8.13	9.17	9.46	8.63	9.03	17.48	22.89	18.1	14.15	19.06	11.64
ENSMUSG00000001020	ENSMUST00000001046,ENSMUST00000142476	417	367	0	0	0	0	0	0	0.11	0	0	0	0.01	0
ENSMUSG00000001021	ENSMUST00000001047,ENSMUST00000196635,ENSMUST00000199225,ENSMUST00000200290,ENSMUST00000200508	1346.94	1296.94	0.12	0.07	0.01	0.08	0.03	0.08	0.71	0.19	0.34	0.08	0.41	0.24
ENSMUSG00000001023	ENSMUST00000001049,ENSMUST00000107329	426.5	376.5	0	0	0.05	0	0	0	0	0	0	0	0	0
ENSMUSG00000001025	ENSMUST00000001051,ENSMUST00000197189,ENSMUST00000198128,ENSMUST00000200289	464	414	4.25	2.82	3.34	2.96	3.21	3.29	10.11	7.09	24.1	6.65	8.56	14.2
ENSMUSG00000001027	ENSMUST00000021056,ENSMUST00000174877	6598	6548	0.02	0.01	0.01	0.01	0	0.02	0.02	0.02	0.02	0.01	0.08	0.02
ENSMUSG00000001029	ENSMUST00000001055,ENSMUST00000106809,ENSMUST00000106813,ENSMUST00000141146,ENSMUST00000173795	678.8	628.8	0.17	0.15	0.36	0.11	0.06	0.12	0.26	0.42	0.41	0.2	0.25	0.09
ENSMUSG00000001034	ENSMUST00000079080,ENSMUST00000101085,ENSMUST00000108714,ENSMUST00000123360,ENSMUST00000125840,ENSMUST00000126495,ENSMUST00000128478,ENSMUST00000129272,ENSMUST00000135521,ENSMUST00000139663,ENSMUST00000139932,ENSMUST00000140779,ENSMUST00000152755,ENSMUST00000153441	2442.25	2392.25	3.21	2.47	3.59	3.21	2.31	3.23	16.69	16.36	12.7	8.78	12.4	8.83
ENSMUSG00000001036	ENSMUST00000001063,ENSMUST00000108711,ENSMUST00000108712,ENSMUST00000108713,ENSMUST00000137525,ENSMUST00000141335,ENSMUST00000146455,ENSMUST00000147501,ENSMUST00000148956,ENSMUST00000151545,ENSMUST00000153984,ENSMUST00000178202,ENSMUST00000179936	3683.77	3633.77	8.23	8.59	8	12.04	8.73	7.83	34.6	43.45	26.13	27.17	28.17	16.68
ENSMUSG00000001039	ENSMUST00000102657,ENSMUST00000127889,ENSMUST00000138057,ENSMUST00000140548,ENSMUST00000146562,ENSMUST00000155176	690.63	640.63	9.67	7.21	7.29	8.91	7.66	8.61	22.57	13.88	23.78	15.4	18.94	14.25
ENSMUSG00000001052	ENSMUST00000001079,ENSMUST00000164758,ENSMUST00000165873,ENSMUST00000165889,ENSMUST00000168644,ENSMUST00000168675,ENSMUST00000168908,ENSMUST00000170163,ENSMUST00000172324	1677.71	1627.71	2.13	1.93	2.08	2.6	1.69	2.54	11.41	16.31	11.5	9.6	10.19	7.81
ENSMUSG00000001053	ENSMUST00000001080,ENSMUST00000142721,ENSMUST00000156835	2233.3	2183.3	8.35	7.24	7.72	8.85	7.19	7.52	26.13	25.09	33.99	18.43	23.32	19.28
ENSMUSG00000001054	ENSMUST00000001081,ENSMUST00000132854,ENSMUST00000136020,ENSMUST00000147009	1726.56	1676.56	15.07	13.37	15.28	15.49	12.82	14.41	35.33	36.63	30.46	25.52	26.57	18.09
ENSMUSG00000001056	ENSMUST00000001083,ENSMUST00000127405	921.7	871.7	63.52	58.04	56.89	66.71	55.17	58.9	147.4	160.48	214.74	102.49	142.34	121.52
ENSMUSG00000001062	ENSMUST00000117643,ENSMUST00000118279,ENSMUST00000122363,ENSMUST00000124508,ENSMUST00000127978,ENSMUST00000129591,ENSMUST00000130275,ENSMUST00000130965,ENSMUST00000137569,ENSMUST00000146136,ENSMUST00000149490,ENSMUST00000155853,ENSMUST00000155869	1503.51	1453.51	1.61	0.9	1.19	0.92	1.73	1.32	5.5	6.62	4.74	3.08	4.8	3.8
ENSMUSG00000001065	ENSMUST00000001092,ENSMUST00000130333,ENSMUST00000146158,ENSMUST00000147312,ENSMUST00000150356,ENSMUST00000154450,ENSMUST00000156896,ENSMUST00000211828	2484.07	2434.07	1.56	1.68	1.68	1.69	1.9	1.42	4.23	8.48	6.49	3.51	4.45	3.81
ENSMUSG00000001076	ENSMUST00000064462	1474	1424	0.04	0.05	0.14	0.06	0.09	0.04	0.19	0.12	0.06	0.14	0.06	0.01
ENSMUSG00000001082	ENSMUST00000001109,ENSMUST00000114329,ENSMUST00000114331,ENSMUST00000124668,ENSMUST00000126257,ENSMUST00000128670,ENSMUST00000130347,ENSMUST00000134156,ENSMUST00000136010,ENSMUST00000137150,ENSMUST00000137506,ENSMUST00000137744,ENSMUST00000138212,ENSMUST00000148270,ENSMUST00000149657,ENSMUST00000151247,ENSMUST00000155577,ENSMUST00000200717,ENSMUST00000201147,ENSMUST00000202065,ENSMUST00000202378	1180.2	1130.2	13.93	13.62	17.78	16.09	13.79	18.75	40.5	69.47	71.74	30.43	45.33	40.82
ENSMUSG00000001089	ENSMUST00000001116,ENSMUST00000063021,ENSMUST00000105849,ENSMUST00000129230,ENSMUST00000142248,ENSMUST00000168936,ENSMUST00000170102	6305.99	6255.99	6.96	6	6.96	7.62	6.31	6.63	23.16	33.03	20.09	16.84	21.41	13.48
ENSMUSG00000001095	ENSMUST00000001122	2412	2362	0.13	0.06	0.12	0.05	0.06	0.12	0.05	0.06	0.06	0.08	0.07	0.02
ENSMUSG00000001098	ENSMUST00000001125,ENSMUST00000102581,ENSMUST00000123538,ENSMUST00000132646,ENSMUST00000134173,ENSMUST00000134532,ENSMUST00000135170	2674.49	2624.49	3.61	3.58	4.84	3.56	3.39	5.11	10.25	16.53	15.77	8.2	9.61	9.78
ENSMUSG00000001100	ENSMUST00000001127,ENSMUST00000133601,ENSMUST00000136284,ENSMUST00000147930,ENSMUST00000151499,ENSMUST00000156754	1643.28	1593.28	28.1	25.2	25.97	30.43	25.35	27.67	57.7	40.68	53.46	32.23	43.09	31.43
ENSMUSG00000001103	ENSMUST00000001130,ENSMUST00000125670	1351	1301	0.03	0.02	0.02	0	0.04	0	0.04	0.07	0.02	0.04	0	0.03
ENSMUSG00000001105	ENSMUST00000050366,ENSMUST00000108275,ENSMUST00000128788,ENSMUST00000137120,ENSMUST00000152016	1008.53	958.53	7.4	7.15	7.54	8.13	6.74	7.94	17.42	19.86	19.3	13.6	18.74	10.56
ENSMUSG00000001119	ENSMUST00000001147,ENSMUST00000137599	2150	2100	0.1	0.05	0.09	0.04	0.05	0.04	0.15	0.13	0.06	0.1	0.08	0.08
ENSMUSG00000001120	ENSMUST00000001148,ENSMUST00000092393,ENSMUST00000105411,ENSMUST00000165571,ENSMUST00000168240,ENSMUST00000168465,ENSMUST00000168505,ENSMUST00000171437,ENSMUST00000173854	1942.07	1892.07	1.66	1.97	2.6	2.27	1.6	2.53	8.77	11.36	4.88	6.46	9.98	4.82
ENSMUSG00000001123	ENSMUST00000073001,ENSMUST00000108268,ENSMUST00000108269,ENSMUST00000140073	1433.58	1383.58	0.23	0.48	5.3	0.35	0.47	5.17	1.31	1.33	10.41	0.98	1.7	6.5
ENSMUSG00000001127	ENSMUST00000001155,ENSMUST00000120356,ENSMUST00000122312,ENSMUST00000122850,ENSMUST00000123219,ENSMUST00000128250,ENSMUST00000136451,ENSMUST00000148032,ENSMUST00000150190,ENSMUST00000152955	1945.59	1895.59	9.69	9.25	11.92	12.07	8.85	10.93	34.43	49.82	32.82	25.67	30.82	19.14
ENSMUSG00000001128	ENSMUST00000001156,ENSMUST00000122862	1509.06	1459.06	2.93	2.2	3.21	3.5	2.4	2.9	6.94	9.13	7.62	4.91	6.84	4.5
ENSMUSG00000001131	ENSMUST00000009530,ENSMUST00000115342	838.59	788.59	9.82	7.77	10.79	9.58	9.54	11.08	17.98	16.36	21.91	10.91	16.23	12.35
ENSMUSG00000001134	ENSMUST00000001162,ENSMUST00000123836,ENSMUST00000129899,ENSMUST00000142341,ENSMUST00000147205,ENSMUST00000150719	663.52	613.52	8.34	9.3	8.92	11.09	9.32	9.37	21.73	25.18	29.08	15.47	22.74	16.7
ENSMUSG00000001138	ENSMUST00000001166,ENSMUST00000097776,ENSMUST00000135100,ENSMUST00000154225,ENSMUST00000195264	2871.52	2821.52	2.22	1.96	2.64	2.66	2.42	2.24	13.18	13.87	10.61	9.4	10.51	8.21
ENSMUSG00000001143	ENSMUST00000001171,ENSMUST00000115011,ENSMUST00000123583,ENSMUST00000125304,ENSMUST00000134594,ENSMUST00000152088,ENSMUST00000192969,ENSMUST00000193502	2388.69	2338.69	1.19	1.21	1.96	1.42	1.08	1.43	8.52	10.21	7.69	5.99	8.5	4.61
ENSMUSG00000001150	ENSMUST00000170795,ENSMUST00000218361,ENSMUST00000218881,ENSMUST00000218904,ENSMUST00000219811,ENSMUST00000220410	3194.51	3144.51	22.17	19.58	19.19	23.33	21.01	17.38	59.9	66.96	86.65	43.04	56.45	52.36
ENSMUSG00000001151	ENSMUST00000001179,ENSMUST00000217838,ENSMUST00000218747,ENSMUST00000219011,ENSMUST00000219243,ENSMUST00000219403,ENSMUST00000219701,ENSMUST00000220395	7822.15	7772.15	9.63	8.68	9.22	10.99	8.97	8.97	35.28	66.32	37.55	26.05	38.28	24.85
ENSMUSG00000001155	ENSMUST00000001183,ENSMUST00000137347,ENSMUST00000146344	1099.26	1049.26	0.12	0.02	0	0.04	0.02	0.04	0.01	0	0.05	0	0.08	0.02
ENSMUSG00000001156	ENSMUST00000001184,ENSMUST00000203946,ENSMUST00000204437,ENSMUST00000205076	3407.07	3357.07	0.77	0.45	1.08	0.82	0.45	0.95	2.16	3.35	1.91	1.29	2.15	1.39
ENSMUSG00000001157	ENSMUST00000001185,ENSMUST00000113679,ENSMUST00000135880,ENSMUST00000203741	2753.4	2703.4	4.39	3.85	3.93	4.19	3.78	4.2	15.13	16.86	14.52	10.76	12.78	9.25
ENSMUSG00000001158	ENSMUST00000001186,ENSMUST00000113683,ENSMUST00000131674,ENSMUST00000133404	861.78	811.78	14.51	12.03	12.72	14.85	12.63	12.38	36.99	36.94	38.96	23.63	33.74	23.29
ENSMUSG00000001166	ENSMUST00000117193,ENSMUST00000125547,ENSMUST00000130045	2291	2241	1.81	4.5	8.48	1.77	4.07	7.62	4.92	9.07	12.78	2.77	6.52	7.47
ENSMUSG00000001168	ENSMUST00000072476,ENSMUST00000171820	1232.24	1182.24	0.06	0	0.02	0.04	0.02	0	0.06	0.15	0.03	0.1	0.03	0.02
ENSMUSG00000001173	ENSMUST00000001202,ENSMUST00000115013,ENSMUST00000115020,ENSMUST00000142719,ENSMUST00000144664,ENSMUST00000146486,ENSMUST00000154732	4300.34	4250.34	1.92	1.48	1.93	1.88	1.6	2.23	9.45	9.65	4.93	6.57	6.95	3.59
ENSMUSG00000001175	ENSMUST00000001204,ENSMUST00000110082,ENSMUST00000127300,ENSMUST00000153524	1583.75	1533.75	67.69	61.56	66.28	72.28	59.05	62.89	131.41	167.61	175.32	94.5	141.23	101.69
ENSMUSG00000001211	ENSMUST00000001240,ENSMUST00000105387,ENSMUST00000105388,ENSMUST00000105389,ENSMUST00000105390,ENSMUST00000138035,ENSMUST00000139282,ENSMUST00000146296,ENSMUST00000146899,ENSMUST00000150828,ENSMUST00000166360,ENSMUST00000219907,ENSMUST00000219932	1778.17	1728.17	5.93	5.35	6.58	6.87	5.11	6.55	17.14	17.49	14.48	13.97	14.66	8.79
ENSMUSG00000001225	ENSMUST00000001254,ENSMUST00000109275,ENSMUST00000110854,ENSMUST00000165816,ENSMUST00000167432,ENSMUST00000168209,ENSMUST00000171616	3246.93	3196.93	0.02	0.02	0	0.06	0.02	0.01	0.01	0.04	0	0	0	0.02
ENSMUSG00000001227	ENSMUST00000001256,ENSMUST00000167545	3736	3686	0.39	0.38	0.4	0.43	0.35	0.41	1.31	1.1	0.84	0.94	1.13	0.41
ENSMUSG00000001228	ENSMUST00000001258,ENSMUST00000113035,ENSMUST00000113038,ENSMUST00000113039,ENSMUST00000137876,ENSMUST00000139654,ENSMUST00000142387	3185.91	3135.91	57.37	49.28	58.53	61.15	52.74	57.24	170.75	172.42	175.51	125.29	148.09	119.95
ENSMUSG00000001229	ENSMUST00000038794,ENSMUST00000223616	3594.37	3544.37	1.64	1.29	1.98	1.65	1.36	1.78	6.72	8.87	7.9	4.59	6.55	4.99
ENSMUSG00000001240	ENSMUST00000107282,ENSMUST00000122006,ENSMUST00000128260,ENSMUST00000129680,ENSMUST00000138229,ENSMUST00000149006,ENSMUST00000149585,ENSMUST00000151830	1136.82	1086.82	0.19	0.08	0.14	0.09	0.06	0.15	0.46	0.59	0.73	0.35	0.31	0.32
ENSMUSG00000001247	ENSMUST00000001279,ENSMUST00000098553,ENSMUST00000108116,ENSMUST00000147431,ENSMUST00000205961	2004.79	1954.79	3.24	2.77	3.42	3.4	2.71	3.2	11.18	11.8	11.09	8.44	10.05	6.03
ENSMUSG00000001248	ENSMUST00000001280,ENSMUST00000085636,ENSMUST00000185514,ENSMUST00000185589,ENSMUST00000185985,ENSMUST00000186634,ENSMUST00000186723,ENSMUST00000187679,ENSMUST00000188032,ENSMUST00000202814,ENSMUST00000205298,ENSMUST00000206233,ENSMUST00000206432,ENSMUST00000220635	2143.58	2093.58	6.03	5.5	5.86	6.98	5.49	5.38	22.93	29.92	21	15.53	22.47	12.46
ENSMUSG00000001249	ENSMUST00000039435,ENSMUST00000108102,ENSMUST00000164340,ENSMUST00000164929,ENSMUST00000165124,ENSMUST00000165480,ENSMUST00000167719,ENSMUST00000168623,ENSMUST00000168884,ENSMUST00000171225,ENSMUST00000171259	1601.57	1551.57	0.57	0.53	0.68	1	0.99	0.5	2.29	2.49	1.8	2.54	2.3	0.72
ENSMUSG00000001260	ENSMUST00000031119,ENSMUST00000197068,ENSMUST00000199705,ENSMUST00000200126	2610.67	2560.67	0.08	0.04	0	0.01	0.01	0.01	0.03	0.1	0.05	0.02	0.01	0.02
ENSMUSG00000001270	ENSMUST00000001304,ENSMUST00000220888,ENSMUST00000222513,ENSMUST00000222705,ENSMUST00000223099	1481.92	1431.92	162.87	145.45	139.83	166.33	134.09	145.2	344.32	268.26	357	239.8	297.73	207.75
ENSMUSG00000001280	ENSMUST00000001326,ENSMUST00000163709,ENSMUST00000165837,ENSMUST00000168802,ENSMUST00000169619,ENSMUST00000170884	5705.82	5655.82	11.85	9.36	13.32	11.2	10.61	13	49.22	78.06	48.98	33.4	44.83	30.54
ENSMUSG00000001281	ENSMUST00000001327,ENSMUST00000127014,ENSMUST00000229440,ENSMUST00000230550,ENSMUST00000230652	2165	2115	1.17	1.39	1.38	1.29	1.54	2.02	4.53	4.47	5.59	2.29	3.89	3.56
ENSMUSG00000001285	ENSMUST00000001331,ENSMUST00000113682,ENSMUST00000164019,ENSMUST00000164961,ENSMUST00000168547,ENSMUST00000170078,ENSMUST00000170281,ENSMUST00000170713,ENSMUST00000171244,ENSMUST00000171733	899.7	849.7	15.55	14.29	14.87	15.98	13.86	13.62	43.91	48.71	51.76	31.34	43.62	29.73
ENSMUSG00000001288	ENSMUST00000043172,ENSMUST00000063339,ENSMUST00000124224,ENSMUST00000130204,ENSMUST00000135466,ENSMUST00000155563,ENSMUST00000230330	2424.5	2374.5	5	4.36	5.75	5.68	4.18	5.99	12.69	16.75	19.2	8.13	10.86	11.5
ENSMUSG00000001289	ENSMUST00000001335,ENSMUST00000062492,ENSMUST00000165671,ENSMUST00000165717,ENSMUST00000166658,ENSMUST00000168805,ENSMUST00000169637,ENSMUST00000170627	485.38	435.38	47.91	43.4	44.66	52.68	39.79	41.82	109.4	79.45	117.21	80.65	96.53	73.72
ENSMUSG00000001300	ENSMUST00000001319,ENSMUST00000152698,ENSMUST00000209169	3698.32	3648.32	1.44	1	1.38	1.2	1.38	1.54	4.06	3.26	2.72	2.43	2.97	2.14
ENSMUSG00000001305	ENSMUST00000001339,ENSMUST00000162336	1403.13	1353.13	21.73	18.88	17.26	22.38	18.2	18.78	50.27	62.9	77.2	37.92	51.26	45.42
ENSMUSG00000001313	ENSMUST00000001347,ENSMUST00000134980,ENSMUST00000153185	1400.01	1350.01	1.85	1.53	1.88	1.84	1.46	2.06	5.25	3.56	4.45	3.85	3.81	2.94
ENSMUSG00000001323	ENSMUST00000065211,ENSMUST00000108447,ENSMUST00000108448,ENSMUST00000121738,ENSMUST00000123855,ENSMUST00000127499,ENSMUST00000128556,ENSMUST00000135587,ENSMUST00000138612,ENSMUST00000147817	1724.05	1674.05	0.22	0.15	0.24	0.16	0.16	0.23	1.2	2.56	0.95	0.75	1.39	0.58
ENSMUSG00000001333	ENSMUST00000102599,ENSMUST00000146448	2111.09	2061.09	0.28	0.15	0.17	0.24	0.2	0.29	0.54	0.62	0.52	0.32	0.47	0.26
ENSMUSG00000001334	ENSMUST00000102600	2763	2713	0.11	0.17	0.15	0.22	0.13	0.13	0.31	0.31	0.24	0.12	0.18	0.18
ENSMUSG00000001348	ENSMUST00000069330,ENSMUST00000115315,ENSMUST00000165735,ENSMUST00000213815,ENSMUST00000216684,ENSMUST00000217643	1356	1306	0.69	0.64	0.67	0.7	0.59	0.6	1.72	0.61	1.01	0.99	1.57	0.62
ENSMUSG00000001349	ENSMUST00000001384,ENSMUST00000213607,ENSMUST00000214601,ENSMUST00000216141,ENSMUST00000216872	1458	1408	0.27	0.31	0.2	0.25	0.2	0.31	2.79	4.17	3.96	1.9	2.85	2.49
ENSMUSG00000001366	ENSMUST00000001402,ENSMUST00000085311,ENSMUST00000159099,ENSMUST00000159453,ENSMUST00000162310,ENSMUST00000162451,ENSMUST00000162625	1636.84	1586.84	2.68	2.24	2.31	2.98	2.61	2.44	7.71	12.58	11.26	6.06	6.71	5.01
ENSMUSG00000001376	ENSMUST00000001412,ENSMUST00000164052,ENSMUST00000170873,ENSMUST00000183532,ENSMUST00000183935,ENSMUST00000184411,ENSMUST00000184461,ENSMUST00000184780,ENSMUST00000184959	3618.27	3568.27	9.7	9.13	10.79	11.14	10.03	9.35	27.47	46.87	31.33	19.51	26.55	19.33
ENSMUSG00000001380	ENSMUST00000001416	1987	1937	18.96	18.26	17.71	21.05	17.8	17.73	42.44	50.34	54.64	31.35	39.68	32.62
ENSMUSG00000001383	ENSMUST00000001419	2257	2207	11.46	10.02	11.41	11.53	10.86	11.49	31.11	32.29	34.55	21.17	25.86	23.42
ENSMUSG00000001403	ENSMUST00000001439,ENSMUST00000088248	967.74	917.74	36.48	32.29	42.28	38.27	34.94	45.12	78.88	69.71	86.04	49.61	62.19	54.44
ENSMUSG00000001415	ENSMUST00000001451,ENSMUST00000192009,ENSMUST00000192057,ENSMUST00000192377,ENSMUST00000193007,ENSMUST00000193097,ENSMUST00000193224,ENSMUST00000194359,ENSMUST00000194942	3052.1	3002.1	15.35	15.8	18.44	17.69	15.97	17.74	65.32	110.84	69.33	44.34	71.15	45.09
ENSMUSG00000001416	ENSMUST00000001452,ENSMUST00000163735,ENSMUST00000164122,ENSMUST00000164166,ENSMUST00000164783,ENSMUST00000167000,ENSMUST00000167718,ENSMUST00000168062,ENSMUST00000168971,ENSMUST00000193666	1677.87	1627.87	137.07	152.16	249.05	134.75	138.37	230.58	374.62	399.79	791.05	263.26	359.51	461.71
ENSMUSG00000001418	ENSMUST00000001454,ENSMUST00000131666,ENSMUST00000140039,ENSMUST00000152801,ENSMUST00000153716,ENSMUST00000154381,ENSMUST00000176425,ENSMUST00000176519,ENSMUST00000177005,ENSMUST00000193646	872.08	822.08	14.55	13.67	17.77	13.93	13.25	22.02	38.71	35.36	34.06	20.89	27.15	22.41
ENSMUSG00000001419	ENSMUST00000001455,ENSMUST00000107558,ENSMUST00000107559,ENSMUST00000119251,ENSMUST00000139153,ENSMUST00000140927,ENSMUST00000152861	3719.47	3669.47	0.7	0.5	0.6	0.83	0.68	0.66	4.65	4.92	3.34	2.9	3.66	1.45
ENSMUSG00000001420	ENSMUST00000001456,ENSMUST00000107552,ENSMUST00000107553,ENSMUST00000193872	1214.16	1164.16	2.98	3.16	3.26	2.78	3.16	2.82	5.19	8.13	8.33	2.97	6.3	5.12
ENSMUSG00000001424	ENSMUST00000001460,ENSMUST00000163772,ENSMUST00000164915,ENSMUST00000165151,ENSMUST00000166136,ENSMUST00000167201,ENSMUST00000168362,ENSMUST00000169321,ENSMUST00000169579,ENSMUST00000171195,ENSMUST00000171532,ENSMUST00000183161	3069.92	3019.92	20.57	16.86	19	18.97	16.41	19.07	71.83	63.94	60.58	44.27	59.98	41.59
ENSMUSG00000001435	ENSMUST00000072755,ENSMUST00000081654,ENSMUST00000105409,ENSMUST00000156009,ENSMUST00000218407	4922.97	4872.97	21.64	19.56	21.12	24.68	20.76	19.16	129.4	155.59	129.45	88.34	118.57	83.48
ENSMUSG00000001436	ENSMUST00000105410,ENSMUST00000127249,ENSMUST00000130703,ENSMUST00000131031,ENSMUST00000132984,ENSMUST00000133059,ENSMUST00000136150,ENSMUST00000136925,ENSMUST00000144234	2021.67	1971.67	1.95	1.67	2.24	2.32	1.66	1.95	6.35	7.04	8.4	4.16	4.98	5.23
ENSMUSG00000001440	ENSMUST00000001479,ENSMUST00000132633,ENSMUST00000153727	4826.91	4776.91	54.68	48.84	54.36	57.61	48.1	51.62	197.61	277.12	242.57	138.7	198.66	157.35
ENSMUSG00000001441	ENSMUST00000001480,ENSMUST00000107608,ENSMUST00000109294,ENSMUST00000133907,ENSMUST00000146833,ENSMUST00000147287,ENSMUST00000152546,ENSMUST00000152820,ENSMUST00000154372,ENSMUST00000154917,ENSMUST00000163164,ENSMUST00000163950,ENSMUST00000165216,ENSMUST00000165489,ENSMUST00000167806,ENSMUST00000168743,ENSMUST00000170506,ENSMUST00000171320,ENSMUST00000172108	2255.81	2205.81	10.99	10.35	12.11	11.86	9.25	10.81	63.5	80.55	51.95	53.58	54.89	35.3
ENSMUSG00000001444	ENSMUST00000001484	2488	2438	0.37	0.38	0.49	0.47	0.3	0.49	0.5	0.22	0.33	0.31	0.23	0.23
ENSMUSG00000001445	ENSMUST00000001485,ENSMUST00000054252	1708	1658	11.81	10.77	11.85	11.68	10.17	10.94	23.52	22.82	27.96	18.37	21.33	16.88
ENSMUSG00000001467	ENSMUST00000001507,ENSMUST00000129448,ENSMUST00000151539,ENSMUST00000199909	3074.66	3024.66	18.05	15.65	14.93	19.06	14.76	14.2	56.49	82.94	67.78	43.48	64.27	42.93
ENSMUSG00000001472	ENSMUST00000057934,ENSMUST00000108840,ENSMUST00000211932,ENSMUST00000211964,ENSMUST00000212470,ENSMUST00000212498,ENSMUST00000212569,ENSMUST00000212571,ENSMUST00000212741,ENSMUST00000212880,ENSMUST00000212996	1711.61	1661.61	28.35	23.23	24.73	25.86	22.12	25.21	71.62	87.9	89.23	52.41	79.59	54.58
ENSMUSG00000001473	ENSMUST00000001513	1757	1707	9.15	8.15	8.08	10.21	7.75	7.72	23.33	24.29	23.54	17	22.25	15.17
ENSMUSG00000001482	ENSMUST00000001522,ENSMUST00000065534,ENSMUST00000093049,ENSMUST00000108830,ENSMUST00000108832,ENSMUST00000124741,ENSMUST00000128424,ENSMUST00000132063,ENSMUST00000212391,ENSMUST00000212827,ENSMUST00000212883	2869.86	2819.86	7.82	6.56	7.19	8.13	6.83	6.57	21.01	21.37	21.56	17.14	17.74	13.89
ENSMUSG00000001493	ENSMUST00000057054	2228	2178	0.01	0.01	0.02	0.01	0	0.01	0	0.08	0.06	0	0.06	0.07
ENSMUSG00000001494	ENSMUST00000001534	2066	2016	0.01	0.01	0.03	0.01	0.02	0.02	0.07	0	0.01	0.02	0.04	0
ENSMUSG00000001496	ENSMUST00000001536,ENSMUST00000178477	2242	2192	0.01	0	0.01	0.01	0	0.02	0.01	0	0.01	0.01	0	0
ENSMUSG00000001497	ENSMUST00000001538,ENSMUST00000152848,ENSMUST00000153250	4232	4182	0.02	0.02	0.02	0.02	0	0.02	0.02	0.04	0.03	0.01	0	0.02
ENSMUSG00000001504	ENSMUST00000074372,ENSMUST00000163393,ENSMUST00000167067,ENSMUST00000169028,ENSMUST00000172353	1633.71	1583.71	0.89	0.72	1.09	1.06	0.88	0.73	2.31	2.37	2.98	1.27	1.61	1.18
ENSMUSG00000001506	ENSMUST00000001547,ENSMUST00000139974,ENSMUST00000148046,ENSMUST00000148593	5930	5880	0.01	0	0.02	0.04	0.06	0.17	0.39	0.45	0.67	0.43	0.39	0.71
ENSMUSG00000001507	ENSMUST00000001548,ENSMUST00000107739,ENSMUST00000120375,ENSMUST00000140342,ENSMUST00000141693,ENSMUST00000145671	4792.49	4742.49	0.55	0.61	0.83	0.71	0.49	0.73	4.97	6	5.41	4.44	4.64	3.92
ENSMUSG00000001508	ENSMUST00000100551,ENSMUST00000103162,ENSMUST00000139855,ENSMUST00000152042,ENSMUST00000166320	1115.6	1065.6	0	0.03	0	0.11	0.05	0	0.05	0.16	0.1	0.13	0.05	0.03
ENSMUSG00000001510	ENSMUST00000092768	2607	2557	0	0.01	0	0	0	0.01	0.01	0.03	0.02	0.02	0.03	0
ENSMUSG00000001517	ENSMUST00000073316,ENSMUST00000112148,ENSMUST00000123988,ENSMUST00000125456,ENSMUST00000136395,ENSMUST00000153423,ENSMUST00000203040,ENSMUST00000203258	2156.39	2106.39	5.57	5.06	8.29	6.97	5.91	7.12	26.43	29.04	28.55	18.76	19.43	17.29
ENSMUSG00000001518	ENSMUST00000001559,ENSMUST00000133994,ENSMUST00000142615,ENSMUST00000203026,ENSMUST00000203195,ENSMUST00000203374,ENSMUST00000203853,ENSMUST00000203984,ENSMUST00000204362,ENSMUST00000204467	1619.42	1569.42	7	5.26	5.76	6.99	5.99	5.39	18.65	25.66	22.15	11.74	23.27	12.11
ENSMUSG00000001520	ENSMUST00000001561,ENSMUST00000120405,ENSMUST00000123867,ENSMUST00000136631,ENSMUST00000147155,ENSMUST00000204836	2413.33	2363.33	0.07	0.06	0.01	0.05	0	0.07	0.11	0.4	0.15	0.11	0.08	0.06
ENSMUSG00000001521	ENSMUST00000001562,ENSMUST00000128708,ENSMUST00000133134,ENSMUST00000138313,ENSMUST00000157005,ENSMUST00000203625	2609.55	2559.55	3.72	2.92	5.08	3.76	3.21	4.86	16.36	19.63	13.17	12.75	14.04	9.66
ENSMUSG00000001524	ENSMUST00000001565,ENSMUST00000159671,ENSMUST00000159852,ENSMUST00000160039,ENSMUST00000160535,ENSMUST00000160711,ENSMUST00000160734,ENSMUST00000160752,ENSMUST00000162266,ENSMUST00000162604,ENSMUST00000162894,ENSMUST00000162927	1396.62	1346.62	11.64	12.08	11.89	12.46	12.17	10.81	31.43	30.32	38.07	23.79	27.41	23.81
ENSMUSG00000001525	ENSMUST00000001566,ENSMUST00000134978,ENSMUST00000156050,ENSMUST00000173253	2507.07	2457.07	192.91	175.44	193.5	196.73	166.13	191.52	520.12	539.9	571.84	355.69	458.71	339.59
ENSMUSG00000001542	ENSMUST00000001583,ENSMUST00000220572,ENSMUST00000221432,ENSMUST00000221979,ENSMUST00000222194,ENSMUST00000222564,ENSMUST00000222853,ENSMUST00000222892,ENSMUST00000223535	2433.8	2383.8	9.01	7.99	9.73	8.88	9.68	8.77	32.57	48.1	24.41	25.48	28.03	15.49
ENSMUSG00000001552	ENSMUST00000001592,ENSMUST00000107403,ENSMUST00000123903,ENSMUST00000124659,ENSMUST00000128268,ENSMUST00000149798,ENSMUST00000151476,ENSMUST00000152774,ENSMUST00000155746	2802.58	2752.58	21.13	17.57	21.39	21.26	18.94	21.2	60.27	76.46	58.73	40.3	58.49	35.65
ENSMUSG00000001555	ENSMUST00000001595,ENSMUST00000107400,ENSMUST00000125616,ENSMUST00000134815,ENSMUST00000139084	2405.86	2355.86	0.69	0.6	0.85	1.14	1	0.7	3.06	2.34	4.31	2.19	2.38	3.36
ENSMUSG00000001558	ENSMUST00000001599,ENSMUST00000107395	2017	1967	0.06	0.1	0.12	0.07	0.09	0.11	0.38	0.53	0.29	0.22	0.36	0.21
ENSMUSG00000001566	ENSMUST00000001608,ENSMUST00000165512	2153.72	2103.72	0.26	0.07	0.08	0.12	0.07	0.04	0.26	0.27	0.14	0.19	0.21	0.12
ENSMUSG00000001569	ENSMUST00000001611,ENSMUST00000146347	2916.62	2866.62	6.92	4.84	4.69	6.49	6.02	5.82	15.74	24.7	19.96	15.5	15.57	12.63
ENSMUSG00000001576	ENSMUST00000001619,ENSMUST00000163213,ENSMUST00000165021,ENSMUST00000165802,ENSMUST00000167070,ENSMUST00000167662,ENSMUST00000170640	2388.24	2338.24	9.83	8.92	10.87	11.28	9.4	10.81	33.41	36.88	25.73	23.73	27.52	15.8
ENSMUSG00000001583	ENSMUST00000001626,ENSMUST00000108626,ENSMUST00000108628,ENSMUST00000125571,ENSMUST00000156507	2606.81	2556.81	1.16	1.01	1.55	1.48	0.89	1.36	5.62	5.89	4.16	4.29	3.6	2.47
ENSMUSG00000001588	ENSMUST00000001631,ENSMUST00000108622,ENSMUST00000127238,ENSMUST00000148037	2322.74	2272.74	4.17	4.27	3.88	4.5	3.68	4.03	9.03	10.28	6.73	5.91	7.53	3.71
ENSMUSG00000001604	ENSMUST00000102533,ENSMUST00000136812,ENSMUST00000143942	1199.65	1149.65	13.82	12.07	10.58	13.54	11.72	11.82	40.79	40.23	46.78	27.39	36.48	26.16
ENSMUSG00000001622	ENSMUST00000001667,ENSMUST00000113267,ENSMUST00000113271,ENSMUST00000140690,ENSMUST00000144929,ENSMUST00000148793	1432.27	1382.27	0.05	0.05	0.08	0.01	0.02	0.06	0	0	0.03	0.02	0	0.03
ENSMUSG00000001627	ENSMUST00000001672,ENSMUST00000164047,ENSMUST00000164354,ENSMUST00000165027,ENSMUST00000169319,ENSMUST00000169926,ENSMUST00000170119,ENSMUST00000170752,ENSMUST00000171530,ENSMUST00000171553	1029.73	979.73	31.59	31.29	30.79	30.73	28.4	34.33	108.33	169.74	120.99	75.19	117.57	68.5
ENSMUSG00000001630	ENSMUST00000001675,ENSMUST00000111644,ENSMUST00000203318	3189.42	3139.42	4.33	3.1	4.27	4.47	3.45	4.04	10.71	15.57	11.35	8.44	11.62	7.15
ENSMUSG00000001632	ENSMUST00000113117,ENSMUST00000113119,ENSMUST00000113121,ENSMUST00000113122,ENSMUST00000124530,ENSMUST00000131594,ENSMUST00000138737,ENSMUST00000203577,ENSMUST00000204198,ENSMUST00000204626	4234.3	4184.3	5.84	5.36	6.2	7.05	5.47	5.95	22.58	36.64	25.14	16.63	22.56	15.14
ENSMUSG00000001642	ENSMUST00000102980,ENSMUST00000126991,ENSMUST00000136559,ENSMUST00000142761,ENSMUST00000154655,ENSMUST00000201392	1325.17	1275.17	44.15	40.93	50.88	44.38	38.43	48.62	79.16	39.58	110.19	57.82	75.61	77.52
ENSMUSG00000001655	ENSMUST00000001700	2461	2411	0.47	0.29	0.4	0.34	0.33	0.62	1.08	1.02	0.99	0.65	0.76	0.66
ENSMUSG00000001656	ENSMUST00000001701	2021	1971	0.02	0	0	0.03	0.02	0	0.1	0.58	0.08	0.11	0.31	0
ENSMUSG00000001657	ENSMUST00000001703,ENSMUST00000189484	1868	1818	0.04	0.01	0.01	0.02	0.04	0.01	0.05	0.1	0	0.03	0.07	0.01
ENSMUSG00000001661	ENSMUST00000001711,ENSMUST00000173210,ENSMUST00000173421	651.63	601.63	0.12	0	0	0.01	0	0.01	0.02	0.11	0.02	0.06	0	0.03
ENSMUSG00000001663	ENSMUST00000001713,ENSMUST00000120177,ENSMUST00000139724	1038.68	988.68	1.17	1.09	1.45	1.47	1.01	1.03	2.32	2.26	2.12	1.31	1.91	1.41
ENSMUSG00000001665	ENSMUST00000001715,ENSMUST00000133869,ENSMUST00000173537,ENSMUST00000174187,ENSMUST00000174649,ENSMUST00000218091	1595.75	1545.75	1.42	1.26	2.05	1.77	0.94	2.14	2.94	3.16	4.19	3.31	2.75	2.21
ENSMUSG00000001666	ENSMUST00000001716,ENSMUST00000172820	644.29	594.29	20.73	15.31	18.36	20.28	18.01	19.9	47.41	41.07	42.03	30.82	40.67	24.83
ENSMUSG00000001670	ENSMUST00000001720,ENSMUST00000143741	2375	2325	0.03	0.06	0	0.05	0.06	0	0.01	0.06	0	0	0	0
ENSMUSG00000001672	ENSMUST00000001722,ENSMUST00000051430,ENSMUST00000155052	2170.3	2120.3	0.08	0.2	0.2	0.09	0.06	0.23	0.71	0.91	0.93	0.58	0.48	0.38
ENSMUSG00000001674	ENSMUST00000001724,ENSMUST00000131471,ENSMUST00000134417,ENSMUST00000148809	2137.52	2087.52	22.09	17.95	23.31	22.15	19.75	21.15	52.01	60.06	69.77	31.98	48.27	43.63
ENSMUSG00000001687	ENSMUST00000079324,ENSMUST00000164904,ENSMUST00000201139,ENSMUST00000201595,ENSMUST00000201597,ENSMUST00000201688,ENSMUST00000202938	1765.36	1715.36	21.91	20.38	21.91	24.91	19.65	22.72	58.48	67.72	66.79	40.91	64.67	43.2
ENSMUSG00000001700	ENSMUST00000070166	2605	2555	0.36	0.22	0.21	0.25	0.24	0.2	1.59	1.26	1.06	0.99	1.38	1.05
ENSMUSG00000001707	ENSMUST00000001757,ENSMUST00000223823,ENSMUST00000224487	1545.18	1495.18	17.75	17.97	16.87	18.44	15.85	16.81	48.06	47.59	54.69	31	45.82	31.42
ENSMUSG00000001729	ENSMUST00000001780,ENSMUST00000123563,ENSMUST00000127588,ENSMUST00000127902,ENSMUST00000128300,ENSMUST00000130342,ENSMUST00000139388,ENSMUST00000144550,ENSMUST00000159815	2170.92	2120.92	4.26	4.15	4.23	4.73	3.64	4.65	16.85	15.02	16.74	10.24	13.97	8.53
ENSMUSG00000001739	ENSMUST00000001790,ENSMUST00000111093,ENSMUST00000128391	1850	1800	0.03	0.09	0.12	0.09	0.05	0.12	0.58	1.41	0.34	0.34	0.87	0.12
ENSMUSG00000001741	ENSMUST00000001792,ENSMUST00000131916,ENSMUST00000145610,ENSMUST00000151047,ENSMUST00000153560,ENSMUST00000156553	2897.76	2847.76	0.05	0.02	0.02	0.02	0	0.05	0.03	0.1	0.02	0.02	0	0
ENSMUSG00000001750	ENSMUST00000001801,ENSMUST00000122885,ENSMUST00000125792,ENSMUST00000126070,ENSMUST00000126643,ENSMUST00000127308,ENSMUST00000131327,ENSMUST00000132164,ENSMUST00000134698,ENSMUST00000135070,ENSMUST00000145791,ENSMUST00000159824,ENSMUST00000162688	1607.23	1557.23	4.04	5.57	20.68	4.09	4.66	17.59	8.89	18.83	65.84	7.08	11.9	38.88
ENSMUSG00000001751	ENSMUST00000001802,ENSMUST00000138409,ENSMUST00000140735	2560	2510	0.34	0.41	0.52	0.51	0.4	0.55	1.29	1.01	1.34	0.69	0.71	0.75
ENSMUSG00000001755	ENSMUST00000001806,ENSMUST00000107308,ENSMUST00000151056,ENSMUST00000151686	1940.76	1890.76	3.82	3.18	3.98	3.48	3.1	3.5	9.47	8.9	9.33	6.82	8.72	5.93
ENSMUSG00000001761	ENSMUST00000001812,ENSMUST00000201515	3748.54	3698.54	2.64	2.14	2.06	2.49	2.25	2.13	7.24	6.68	3.91	4.56	5.38	2.38
ENSMUSG00000001763	ENSMUST00000046750,ENSMUST00000115250,ENSMUST00000137925	2155.37	2105.37	0.54	0.63	0.49	0.55	0.58	0.45	1.56	1.46	0.91	1.1	1.01	0.59
ENSMUSG00000001767	ENSMUST00000001818,ENSMUST00000145425,ENSMUST00000147904	3209.18	3159.18	9.01	7.83	8.12	9.66	8.17	8.43	24.1	38.98	33.6	17.54	23.78	20.68
ENSMUSG00000001768	ENSMUST00000094480,ENSMUST00000110005,ENSMUST00000137180,ENSMUST00000142847,ENSMUST00000144278,ENSMUST00000144661,ENSMUST00000145874,ENSMUST00000147976,ENSMUST00000149269,ENSMUST00000150449,ENSMUST00000231581	2911.89	2861.89	1.01	0.68	1.27	0.9	0.9	1.25	3.92	6.46	3.69	2.88	3.8	2.26
ENSMUSG00000001773	ENSMUST00000001824,ENSMUST00000107271,ENSMUST00000209082	3009.2	2959.2	0.04	0.05	0.09	0.03	0.04	0.08	0.11	0.09	0.33	0.11	0.13	0.09
ENSMUSG00000001774	ENSMUST00000001825,ENSMUST00000213605,ENSMUST00000214441,ENSMUST00000215421,ENSMUST00000216526,ENSMUST00000216666,ENSMUST00000216800,ENSMUST00000217031,ENSMUST00000217083	2105.25	2055.25	20.63	17.54	21.4	22.47	20.81	21.53	63.78	95.27	70.75	45.54	63.94	48.67
ENSMUSG00000001783	ENSMUST00000001834,ENSMUST00000139413	1988.9	1938.9	26.88	24.45	25.39	28.4	22.93	23.8	65.68	75.35	78.95	47.65	62.92	47.68
ENSMUSG00000001785	ENSMUST00000001836,ENSMUST00000217667,ENSMUST00000219256,ENSMUST00000219626,ENSMUST00000219902	2232.13	2182.13	14.13	14.04	12.91	15.71	12.02	12.68	38.96	48.37	49.67	28.85	38.27	34.38
ENSMUSG00000001786	ENSMUST00000001837,ENSMUST00000117597,ENSMUST00000120344,ENSMUST00000130320,ENSMUST00000130383,ENSMUST00000134490,ENSMUST00000147168	1467.88	1417.88	4.18	3.82	4.31	4.03	3.34	5.87	16.41	32.24	16.87	12.86	17.42	11.28
ENSMUSG00000001794	ENSMUST00000001845,ENSMUST00000108196,ENSMUST00000126116,ENSMUST00000129761,ENSMUST00000141851,ENSMUST00000146852,ENSMUST00000148973,ENSMUST00000207082	1114.81	1064.81	25.13	20.55	21.83	25.16	19.02	23.17	72.71	65.51	65.72	47.82	54.77	41.46
ENSMUSG00000001802	ENSMUST00000118444,ENSMUST00000122409,ENSMUST00000153163,ENSMUST00000155404	3330.63	3280.63	0.57	0.38	0.39	0.52	0.44	0.47	2.38	2.09	0.88	1.65	1.59	0.76
ENSMUSG00000001804	ENSMUST00000019426	3478	3428	0.02	0	0.01	0	0	0.01	0	0	0	0	0	0
ENSMUSG00000001815	ENSMUST00000001867,ENSMUST00000173623	4191	4141	0.01	0.01	0.01	0.01	0	0	0	0.03	0.02	0	0	0.01
ENSMUSG00000001819	ENSMUST00000001872	2483	2433	0.19	0.11	0.15	0.17	0.14	0.16	0.29	0.42	0.37	0.26	0.23	0.18
ENSMUSG00000001823	ENSMUST00000001878	2534	2484	0.02	0	0.02	0	0.01	0.02	0	0	0	0.01	0	0
ENSMUSG00000001827	ENSMUST00000106981,ENSMUST00000106982,ENSMUST00000106983,ENSMUST00000106985,ENSMUST00000106986,ENSMUST00000123321,ENSMUST00000123630,ENSMUST00000124026,ENSMUST00000125298,ENSMUST00000126204,ENSMUST00000134145,ENSMUST00000140068,ENSMUST00000140584,ENSMUST00000150184,ENSMUST00000151706,ENSMUST00000155311	765.14	715.14	10.36	8.61	9.18	10.36	8.35	8.35	25.95	26.27	28.98	18.28	22.79	17.08
ENSMUSG00000001829	ENSMUST00000001884,ENSMUST00000106998,ENSMUST00000123870,ENSMUST00000136193,ENSMUST00000137214,ENSMUST00000142803,ENSMUST00000147439,ENSMUST00000150355,ENSMUST00000150832,ENSMUST00000153473,ENSMUST00000209579	1955.7	1905.7	16.25	15.26	14.85	17.87	12.49	14.97	39.61	46.57	44.83	31.82	39.29	29.27
ENSMUSG00000001833	ENSMUST00000115272,ENSMUST00000165594,ENSMUST00000213435,ENSMUST00000213980,ENSMUST00000214360,ENSMUST00000214520,ENSMUST00000214911,ENSMUST00000215692,ENSMUST00000215721,ENSMUST00000217598	2486.33	2436.33	22.92	19.65	18.99	23.1	21.55	20.28	53.48	73	57.87	39.48	50.12	38.04
ENSMUSG00000001844	ENSMUST00000001900,ENSMUST00000159718,ENSMUST00000159813,ENSMUST00000159941,ENSMUST00000160061,ENSMUST00000161199,ENSMUST00000161333,ENSMUST00000161915,ENSMUST00000162066,ENSMUST00000162284,ENSMUST00000162287,ENSMUST00000162358,ENSMUST00000162941	1200.64	1150.64	2.83	2.96	4.15	3.21	3.02	4.27	9.94	15.21	12.85	5.99	9.9	8.03
ENSMUSG00000001847	ENSMUST00000080537,ENSMUST00000100489,ENSMUST00000131513,ENSMUST00000145709	1560.98	1510.98	21.09	17.33	20.44	22.61	19.93	22.39	52.05	43.54	46.03	38.05	47.02	32
ENSMUSG00000001855	ENSMUST00000065398,ENSMUST00000123062,ENSMUST00000124455,ENSMUST00000126301,ENSMUST00000129496,ENSMUST00000130185,ENSMUST00000130975,ENSMUST00000138012,ENSMUST00000146138,ENSMUST00000152791,ENSMUST00000153096	2375.59	2325.59	6.68	5.15	6.92	6.15	6.47	7.34	26.54	45.25	29.87	21.07	26.73	19.66
ENSMUSG00000001864	ENSMUST00000001920,ENSMUST00000125457,ENSMUST00000128271,ENSMUST00000138833,ENSMUST00000140649,ENSMUST00000145137,ENSMUST00000148056,ENSMUST00000151276,ENSMUST00000156564,ENSMUST00000156743	1947.41	1897.41	0.46	0.48	0.65	0.29	0.25	0.31	2.49	2.44	2.27	1.26	1.9	0.73
ENSMUSG00000001865	ENSMUST00000001921,ENSMUST00000191659	1449	1399	0.01	0	0.04	0	0.02	0.02	0	0	0	0	0	0
ENSMUSG00000001870	ENSMUST00000001927,ENSMUST00000112514,ENSMUST00000112516,ENSMUST00000127458,ENSMUST00000135447,ENSMUST00000135750,ENSMUST00000146839	5766.2	5716.2	1.12	0.96	1.09	1.32	0.95	1.02	6.04	8.59	3.91	3.83	5.09	2.52
ENSMUSG00000001891	ENSMUST00000060895,ENSMUST00000102875,ENSMUST00000133343,ENSMUST00000143890	2163.46	2113.46	8.58	7.85	7.52	9.03	8.24	8.28	21.03	24.67	21.17	14.98	18.89	12.64
ENSMUSG00000001901	ENSMUST00000001965,ENSMUST00000106903,ENSMUST00000140695,ENSMUST00000145539	3252.29	3202.29	0.09	0.13	0.14	0.17	0.08	0.17	0.66	0.56	0.44	0.31	0.5	0.22
ENSMUSG00000001909	ENSMUST00000001974,ENSMUST00000077990,ENSMUST00000109767,ENSMUST00000109768,ENSMUST00000125370,ENSMUST00000127915,ENSMUST00000128022,ENSMUST00000128537,ENSMUST00000131700,ENSMUST00000136423,ENSMUST00000137953,ENSMUST00000138300,ENSMUST00000143427,ENSMUST00000148118,ENSMUST00000150085,ENSMUST00000152301,ENSMUST00000175704,ENSMUST00000175767,ENSMUST00000175784,ENSMUST00000175870,ENSMUST00000175884,…	1395.3	1345.3	23.71	22.59	26.88	27.22	23.42	23.84	80.18	99.45	92.29	61.45	79.45	52.62
ENSMUSG00000001910	ENSMUST00000001975	4300	4250	9.55	8.39	11.43	10.27	8.67	10.44	34.53	39.37	34.56	21.47	28.26	22.66
ENSMUSG00000001911	ENSMUST00000076715,ENSMUST00000099070,ENSMUST00000109762,ENSMUST00000109764,ENSMUST00000126806,ENSMUST00000132236,ENSMUST00000148644,ENSMUST00000148746	2644.17	2594.17	0.15	0.21	0.35	0.19	0.15	0.22	0.2	0.39	0.28	0.21	0.26	0.28
ENSMUSG00000001918	ENSMUST00000108496,ENSMUST00000127401,ENSMUST00000131664,ENSMUST00000134407,ENSMUST00000135817,ENSMUST00000141349,ENSMUST00000147814,ENSMUST00000206444	2137.76	2087.76	6.82	6.86	8.95	7.91	7.14	7.75	18.75	33.83	23.23	13.46	20.71	16.15
ENSMUSG00000001924	ENSMUST00000001989,ENSMUST00000089217,ENSMUST00000130694,ENSMUST00000136915,ENSMUST00000137892,ENSMUST00000152235	3420.61	3370.61	36.15	32.92	41.69	35.86	31.19	42.99	115.79	144.3	125.9	83.25	103.13	74.82
ENSMUSG00000001930	ENSMUST00000100941,ENSMUST00000112253,ENSMUST00000112254,ENSMUST00000126709,ENSMUST00000129436,ENSMUST00000134073,ENSMUST00000139678,ENSMUST00000141521,ENSMUST00000146264,ENSMUST00000147101,ENSMUST00000150548	5098.08	5048.08	1.77	1.83	1.89	2.54	1.89	2.18	8.38	8.87	4.17	6.09	7.9	2.67
ENSMUSG00000001942	ENSMUST00000002007,ENSMUST00000213126,ENSMUST00000213964,ENSMUST00000215474,ENSMUST00000215678,ENSMUST00000215829,ENSMUST00000217567	2899.95	2849.95	2.6	1.95	2.81	2.46	1.73	2.27	5.63	4.7	5.5	4.2	4.45	3.18
ENSMUSG00000001943	ENSMUST00000002008,ENSMUST00000213502,ENSMUST00000213699,ENSMUST00000215271,ENSMUST00000215710,ENSMUST00000215957	733.73	683.73	0.64	0.29	0.52	0.17	0.27	0.62	0.99	1.19	1.01	0.51	0.89	0.71
ENSMUSG00000001946	ENSMUST00000002011,ENSMUST00000123198,ENSMUST00000131832,ENSMUST00000144596,ENSMUST00000146860,ENSMUST00000214142	1865	1815	0.04	0.15	0.26	0.22	0.18	0.36	0.26	0.69	0.69	0.29	0.58	0.42
ENSMUSG00000001948	ENSMUST00000002013,ENSMUST00000214786,ENSMUST00000215336	699.42	649.42	0.54	0.22	0.3	0.27	0.51	0.44	1.03	0.48	1.02	0.57	0.73	0.79
ENSMUSG00000001962	ENSMUST00000114160,ENSMUST00000138242,ENSMUST00000149312	1306.04	1256.04	8.05	6.08	7.31	7.29	6.72	7.38	16.22	10.48	13.73	10.74	12.36	11.54
ENSMUSG00000001964	ENSMUST00000002029,ENSMUST00000088313,ENSMUST00000096424,ENSMUST00000119197,ENSMUST00000129516,ENSMUST00000152288	1358.41	1308.41	7.73	7.89	11.51	9.38	8.05	11.04	31.26	21.83	33.97	22.01	29.15	22.69
ENSMUSG00000001983	ENSMUST00000002048	1383	1333	2.73	2.58	2.55	3.02	2.37	2.52	7.94	7.61	11.01	5.56	7.66	6.95
ENSMUSG00000001985	ENSMUST00000030676	8973	8923	1.59	1.48	3.64	1.8	1.68	3.55	8.83	9.92	10.46	5.71	7.11	7.09
ENSMUSG00000001986	ENSMUST00000076349,ENSMUST00000115103,ENSMUST00000124169,ENSMUST00000126843,ENSMUST00000128197,ENSMUST00000139965,ENSMUST00000148212,ENSMUST00000156721,ENSMUST00000165288	4453.71	4403.71	0.1	0.21	0.07	0.1	0.22	0.12	1.44	1.52	1.01	0.55	1.02	0.5
ENSMUSG00000001988	ENSMUST00000002053,ENSMUST00000210748,ENSMUST00000211103,ENSMUST00000211695	2502.77	2452.77	0.06	0.02	0.01	0.07	0.01	0.02	0.2	0.17	0.1	0.05	0.05	0.03
ENSMUSG00000001995	ENSMUST00000108775,ENSMUST00000212168,ENSMUST00000212604,ENSMUST00000212987	6413.93	6363.93	4.45	4.13	4.8	4.96	4.16	4.7	15.4	19.39	11.58	10.89	12.69	7.26
ENSMUSG00000001998	ENSMUST00000002063,ENSMUST00000110393,ENSMUST00000110394,ENSMUST00000129859,ENSMUST00000142740,ENSMUST00000149254,ENSMUST00000175663,ENSMUST00000177372	4159.41	4109.41	1.86	2.18	2.86	2.4	2.77	2.25	6.97	13.68	8.24	5.94	9.13	5.63
ENSMUSG00000001999	ENSMUST00000002064,ENSMUST00000110389,ENSMUST00000135529,ENSMUST00000142737,ENSMUST00000142861	1120.32	1070.32	1.5	1.38	1.23	1.52	1.33	1.62	3.85	4.18	3.6	2.92	3.58	2.29
ENSMUSG00000002006	ENSMUST00000002080,ENSMUST00000114438	3935	3885	11.41	11.09	10.52	12.49	11.35	10.09	35	38.57	30.47	26.14	32.82	18.35
ENSMUSG00000002007	ENSMUST00000002081,ENSMUST00000136664,ENSMUST00000137045,ENSMUST00000139630	1981	1931	0.01	0.01	0.04	0.01	0	0.01	0.12	0.5	0.15	0.01	0.03	0.09
ENSMUSG00000002010	ENSMUST00000052761,ENSMUST00000129070,ENSMUST00000129367,ENSMUST00000130119,ENSMUST00000140944,ENSMUST00000142707,ENSMUST00000145341,ENSMUST00000148419,ENSMUST00000156299	1101.49	1051.49	39.56	36.38	38.94	42.38	36.91	41.67	92.85	88.13	89.73	62.4	78.68	56.39
ENSMUSG00000002012	ENSMUST00000002087,ENSMUST00000114472,ENSMUST00000114473,ENSMUST00000129106,ENSMUST00000144187	1218.61	1168.61	0.99	0.96	0.8	1.01	0.86	0.9	3.21	2.96	2.35	2.34	2.02	0.97
ENSMUSG00000002014	ENSMUST00000002090,ENSMUST00000129239,ENSMUST00000130738,ENSMUST00000136544,ENSMUST00000141721,ENSMUST00000142829,ENSMUST00000155552,ENSMUST00000166518	796.27	746.27	28.74	28.29	29.68	29.33	25.72	26.55	65.43	56.52	78.93	46.58	55.12	43.3
ENSMUSG00000002015	ENSMUST00000002091	1219	1169	31.86	28.97	30.76	32.1	28.68	31.69	92.99	74.83	100.48	65.16	81.46	58.96
ENSMUSG00000002017	ENSMUST00000112507,ENSMUST00000140729,ENSMUST00000141969	2542.63	2492.63	4.23	3.36	5.05	3.94	3.66	4.44	18.31	25.9	15.78	14.81	18.71	12.17
ENSMUSG00000002020	ENSMUST00000002073,ENSMUST00000110254,ENSMUST00000163189,ENSMUST00000163214,ENSMUST00000165141,ENSMUST00000166383,ENSMUST00000168699	4657.59	4607.59	0.11	0.05	0.13	0.09	0.07	0.22	0.45	0.52	0.52	0.54	0.6	0.34
ENSMUSG00000002028	ENSMUST00000002095,ENSMUST00000114689,ENSMUST00000128768,ENSMUST00000138119,ENSMUST00000152241,ENSMUST00000215489	10204.8	10154.8	0.93	0.75	0.97	0.79	1.03	1.19	8.45	15.11	7.65	6.26	8.75	4.96
ENSMUSG00000002031	ENSMUST00000002099,ENSMUST00000118186,ENSMUST00000124534,ENSMUST00000125877,ENSMUST00000128150,ENSMUST00000133167,ENSMUST00000142586,ENSMUST00000143654,ENSMUST00000147559,ENSMUST00000149020,ENSMUST00000151905,ENSMUST00000154090,ENSMUST00000214854	836.9	786.9	17.73	14.96	19.91	18.83	16.17	17.32	41.5	44.96	40.75	28.47	38.78	24.96
ENSMUSG00000002032	ENSMUST00000002100,ENSMUST00000114705,ENSMUST00000132020,ENSMUST00000213203,ENSMUST00000213363,ENSMUST00000213972,ENSMUST00000214431,ENSMUST00000214833	2422	2372	0.15	0.07	0.1	0.2	0.18	0.12	0.31	0.29	0.18	0.62	0.47	0.09
ENSMUSG00000002033	ENSMUST00000002101,ENSMUST00000159019,ENSMUST00000160886	1324.67	1274.67	0	0.05	0	0.04	0	0.1	0	0	0.08	0.02	0.04	0
ENSMUSG00000002043	ENSMUST00000002112,ENSMUST00000108455,ENSMUST00000129808,ENSMUST00000135972,ENSMUST00000136873,ENSMUST00000147114,ENSMUST00000207730	714.12	664.12	9.25	7.73	8.3	9.31	7.48	8.93	20.38	16.92	16.06	13.04	16.58	10.08
ENSMUSG00000002052	ENSMUST00000002121,ENSMUST00000108314	6378.14	6328.14	9.43	7.99	11.07	10.44	8.89	10.79	38.33	52.56	33.87	27.09	34.83	22.22
ENSMUSG00000002055	ENSMUST00000045026,ENSMUST00000125477,ENSMUST00000128359,ENSMUST00000133579,ENSMUST00000141026,ENSMUST00000146068,ENSMUST00000149711,ENSMUST00000150016	2861.85	2811.85	12.12	10.99	12.7	13.21	11.39	11.73	32.85	41.59	41.13	23.98	29.69	25.02
ENSMUSG00000002057	ENSMUST00000108294	3214	3164	0.01	0.01	0	0.01	0	0	0.02	0	0	0	0.06	0.02
ENSMUSG00000002058	ENSMUST00000002127,ENSMUST00000100755,ENSMUST00000108295,ENSMUST00000125720,ENSMUST00000149161,ENSMUST00000154700,ENSMUST00000155471	1194.57	1144.57	4.89	4.21	5.12	5.07	4.09	4.19	11.1	10.1	9.14	8.9	9.35	5.59
ENSMUSG00000002059	ENSMUST00000002128,ENSMUST00000056241,ENSMUST00000108322,ENSMUST00000126864,ENSMUST00000148603,ENSMUST00000150941,ENSMUST00000154542,ENSMUST00000156435,ENSMUST00000207728	1281.08	1231.08	7.96	8.63	9.49	8.56	7.28	7.42	24.59	27.98	21.67	17.35	19.56	11.34
ENSMUSG00000002064	ENSMUST00000002133,ENSMUST00000133020,ENSMUST00000154080	1007.46	957.46	8.78	9.37	12.23	10.11	8.5	11.52	26.13	28.87	26.28	17.19	23.69	13.75
ENSMUSG00000002068	ENSMUST00000108023,ENSMUST00000124979,ENSMUST00000128785,ENSMUST00000130329,ENSMUST00000137097	1807.39	1757.39	21.58	20.64	24.72	23.01	20.01	23.2	71.88	68.29	84.71	50.23	68.14	55.98
ENSMUSG00000002076	ENSMUST00000002145,ENSMUST00000133308,ENSMUST00000138172	1268.67	1218.67	31.18	28.68	28.28	32.51	27.2	29.51	78.48	84.03	80.45	59.31	72.28	43.42
ENSMUSG00000002083	ENSMUST00000002152,ENSMUST00000136781,ENSMUST00000147267,ENSMUST00000209688	1603.59	1553.59	6.17	5.49	5.04	5.39	4.97	5.13	17	20.15	15.57	10.47	14.23	9.78
ENSMUSG00000002100	ENSMUST00000111430,ENSMUST00000137942,ENSMUST00000169776	4154	4104	0.24	0.19	0.23	0.22	0.24	0.26	0.41	0.47	0.48	0.26	0.29	0.2
ENSMUSG00000002102	ENSMUST00000002171,ENSMUST00000067663,ENSMUST00000111441,ENSMUST00000131473,ENSMUST00000141462,ENSMUST00000145317,ENSMUST00000146506,ENSMUST00000151419,ENSMUST00000152269,ENSMUST00000185715	1293.89	1243.89	70.88	61.39	60.17	71.07	59.02	63.49	142.86	141.57	195.96	101.05	141.7	115.44
ENSMUSG00000002103	ENSMUST00000002172,ENSMUST00000124131,ENSMUST00000127643,ENSMUST00000150403,ENSMUST00000155418	3202.45	3152.45	1.76	1.51	1.92	1.72	1.66	1.78	5.06	5.75	5.4	2.85	3.69	2.96
ENSMUSG00000002104	ENSMUST00000050323,ENSMUST00000111445,ENSMUST00000111446,ENSMUST00000128008	1395.44	1345.44	0.67	0.59	0.67	0.61	0.58	0.67	1.36	0.72	0.92	0.75	0.49	0.47
ENSMUSG00000002105	ENSMUST00000073575,ENSMUST00000079976,ENSMUST00000111436,ENSMUST00000123685,ENSMUST00000130252,ENSMUST00000133047,ENSMUST00000141328,ENSMUST00000142943,ENSMUST00000149430,ENSMUST00000150348,ENSMUST00000153367	1596.63	1546.63	1.51	1.1	2.27	2.24	1.1	1.38	4.28	6.72	3.42	2.31	4.43	2.36
ENSMUSG00000002107	ENSMUST00000002176,ENSMUST00000100429,ENSMUST00000114923,ENSMUST00000114924,ENSMUST00000114927,ENSMUST00000114934,ENSMUST00000123142,ENSMUST00000126742,ENSMUST00000137733,ENSMUST00000138347,ENSMUST00000142941,ENSMUST00000148321,ENSMUST00000150624,ENSMUST00000170438,ENSMUST00000182037,ENSMUST00000182355,ENSMUST00000182404,ENSMUST00000182523,ENSMUST00000182560,ENSMUST00000182657,ENSMUST00000182706,…	2995.34	2945.34	0.57	0.37	0.43	0.58	0.4	0.37	2.34	4.03	0.95	1.42	2.43	0.81
ENSMUSG00000002108	ENSMUST00000002177,ENSMUST00000111354,ENSMUST00000111355,ENSMUST00000111356,ENSMUST00000130031,ENSMUST00000133261,ENSMUST00000136234,ENSMUST00000150654	1364.4	1314.4	0.16	0.25	0.06	0.23	0.17	0.2	0.33	0.48	0.8	0.14	0.25	0.37
ENSMUSG00000002109	ENSMUST00000028696,ENSMUST00000111352,ENSMUST00000135927,ENSMUST00000150427,ENSMUST00000152277	1960.81	1910.81	3.04	3	3.14	3.46	2.92	3.34	10	10.42	7.18	6.85	8.13	4.71
ENSMUSG00000002111	ENSMUST00000002180,ENSMUST00000131400,ENSMUST00000132741,ENSMUST00000169852	471.84	421.84	0.17	0.15	0.12	0.05	0.04	0.1	0.38	0.27	0.08	0.19	0.27	0.14
ENSMUSG00000002129	ENSMUST00000002198,ENSMUST00000129583,ENSMUST00000132666,ENSMUST00000133095	4589.08	4539.08	6.26	5.89	8.56	7.31	6.26	7.75	27.96	37.88	30.2	16.98	24.77	18.3
ENSMUSG00000002147	ENSMUST00000092074,ENSMUST00000120279,ENSMUST00000128072,ENSMUST00000145470,ENSMUST00000156231	2202.41	2152.41	7.42	6.19	7.15	7.07	5.99	7.47	14.78	8.82	12.53	9.53	10.5	8.45
ENSMUSG00000002190	ENSMUST00000002259,ENSMUST00000109831	2999.07	2949.07	0.5	0.44	0.51	0.7	0.52	0.65	3.7	4.89	2.05	2.81	3.12	1.51
ENSMUSG00000002204	ENSMUST00000002274,ENSMUST00000153124,ENSMUST00000207302,ENSMUST00000207543,ENSMUST00000208514	1429.25	1379.25	3.52	3.81	5.9	3.21	3.43	5.41	3.73	1.29	4.14	2.52	2.65	2.23
ENSMUSG00000002205	ENSMUST00000002275,ENSMUST00000125705,ENSMUST00000134750,ENSMUST00000135783,ENSMUST00000136069,ENSMUST00000144515,ENSMUST00000147952,ENSMUST00000165957,ENSMUST00000171821,ENSMUST00000208083	1582.32	1532.32	3.95	4.1	5.33	5.13	3.99	4.23	13.55	13.65	13.23	7.56	11.77	8.17
ENSMUSG00000002210	ENSMUST00000002280,ENSMUST00000108434,ENSMUST00000123188,ENSMUST00000139481,ENSMUST00000146381,ENSMUST00000146686,ENSMUST00000148288	1817.43	1767.43	2.82	2.52	2.89	3.04	2.33	2.43	9.54	13.08	9.71	6.56	8.9	5.4
ENSMUSG00000002221	ENSMUST00000002291,ENSMUST00000196605,ENSMUST00000196641,ENSMUST00000196734,ENSMUST00000197625,ENSMUST00000199714,ENSMUST00000199993	2620.7	2570.7	9.43	8.37	10.37	10.51	8.79	9.6	35.96	49.49	32.94	20.99	32.42	19.23
ENSMUSG00000002222	ENSMUST00000002292,ENSMUST00000123947,ENSMUST00000140696,ENSMUST00000144081,ENSMUST00000149415	5109.59	5059.59	12.55	12.14	12.23	14.02	12.45	11.54	41.83	52.96	36.7	30.39	35.61	23.4
ENSMUSG00000002227	ENSMUST00000002297,ENSMUST00000106774,ENSMUST00000106775,ENSMUST00000136148,ENSMUST00000145414,ENSMUST00000166979,ENSMUST00000168015,ENSMUST00000196161,ENSMUST00000196211	3236.91	3186.91	18.21	17.13	26.68	19.74	17.11	26.15	68.11	73.26	63.24	43.02	54.58	39.99
ENSMUSG00000002228	ENSMUST00000002298,ENSMUST00000197264	1468.29	1418.29	4.51	4.46	4.61	4.59	3.86	3.26	12.4	12.92	12.77	8.93	8.35	6.03
ENSMUSG00000002233	ENSMUST00000002303,ENSMUST00000106787,ENSMUST00000132721,ENSMUST00000176347,ENSMUST00000196817,ENSMUST00000199824	1015.92	965.92	6.16	5.37	5.97	7.23	5.03	5.9	13.27	8.33	11.54	9.38	10.62	5.72
ENSMUSG00000002240	ENSMUST00000002310,ENSMUST00000101056	1313	1263	0.06	0	0	0.01	0	0.01	0.04	0	0	0	0	0.04
ENSMUSG00000002249	ENSMUST00000114799,ENSMUST00000127212,ENSMUST00000146668,ENSMUST00000151557,ENSMUST00000154873,ENSMUST00000156862,ENSMUST00000219703,ENSMUST00000226172	2102.14	2052.14	0.47	0.32	0.69	0.53	0.28	0.6	2.23	2.16	1.7	1.08	1.61	0.87
ENSMUSG00000002250	ENSMUST00000002320,ENSMUST00000123020,ENSMUST00000142226,ENSMUST00000144200,ENSMUST00000166744,ENSMUST00000169040	2327.02	2277.02	0.58	0.55	0.89	0.48	0.48	0.72	2.25	3.01	2.32	1.52	1.73	1.68
ENSMUSG00000002257	ENSMUST00000002327,ENSMUST00000146724	2277	2227	3.19	2.95	3.06	3.59	2.61	3.16	8.4	9.43	10.79	6.41	7.12	6.81
ENSMUSG00000002265	ENSMUST00000051209,ENSMUST00000143703,ENSMUST00000150182,ENSMUST00000155910	7391.66	7341.66	6.28	5.36	5.93	6.88	5.64	5.96	29.36	51.73	19.48	21.62	31.01	12.38
ENSMUSG00000002266	ENSMUST00000002336,ENSMUST00000122432,ENSMUST00000203908,ENSMUST00000213399	5296.36	5246.36	0.11	0.08	0.15	0.17	0.05	0.13	0.51	0.67	0.47	0.57	0.54	0.23
ENSMUSG00000002274	ENSMUST00000002344,ENSMUST00000165838	1106.01	1056.01	9.31	8.2	7.82	8.71	7.04	7.72	17.69	13.18	18.16	12.22	15.3	10.73
ENSMUSG00000002279	ENSMUST00000063344,ENSMUST00000116641,ENSMUST00000126164,ENSMUST00000127280,ENSMUST00000128146,ENSMUST00000137201,ENSMUST00000141606,ENSMUST00000142264,ENSMUST00000154842,ENSMUST00000156868	1729.72	1679.72	2.6	1.9	2.81	2.19	2.63	2.67	9.47	10.04	6.72	5.11	8.24	4.16
ENSMUSG00000002280	ENSMUST00000002350,ENSMUST00000130861,ENSMUST00000131458,ENSMUST00000134108,ENSMUST00000149645,ENSMUST00000154711	2045.13	1995.13	5.34	5.06	4.9	6.02	5.16	5.27	12.51	13.54	18.46	10.04	11.26	11
ENSMUSG00000002289	ENSMUST00000002360,ENSMUST00000173869,ENSMUST00000174858,ENSMUST00000174872	1881.59	1831.59	3.21	2.84	2.62	3.39	2.61	2.55	6.38	6.4	7.53	4.42	5.02	4.29
ENSMUSG00000002297	ENSMUST00000002368,ENSMUST00000163141,ENSMUST00000166364,ENSMUST00000168500,ENSMUST00000168637,ENSMUST00000170927,ENSMUST00000171808,ENSMUST00000197442,ENSMUST00000198785	2145.07	2095.07	36.9	32.76	37.52	37.95	32.53	38.91	98.65	151.06	113.95	72.97	99.53	70.89
ENSMUSG00000002307	ENSMUST00000079421,ENSMUST00000170075,ENSMUST00000172859,ENSMUST00000173028,ENSMUST00000173279,ENSMUST00000173626,ENSMUST00000174146,ENSMUST00000174541,ENSMUST00000174646	2129.8	2079.8	11.24	16.21	26.14	11.77	16.42	24.71	31.24	53.4	88.03	22.8	38.2	53.96
ENSMUSG00000002308	ENSMUST00000002379,ENSMUST00000087559,ENSMUST00000173418	1118.63	1068.63	12.25	11.05	11.46	12.84	10.25	11.05	30.56	16.77	27.93	22.99	23.65	17.82
ENSMUSG00000002319	ENSMUST00000047131,ENSMUST00000125133,ENSMUST00000126064,ENSMUST00000127773,ENSMUST00000135221,ENSMUST00000141499,ENSMUST00000141848,ENSMUST00000146528,ENSMUST00000148351,ENSMUST00000148942,ENSMUST00000150951,ENSMUST00000155464,ENSMUST00000228754	1526.8	1476.8	14.59	11.86	16.01	15.23	11.09	15.58	43.41	52.93	59.32	28.86	40.44	36.11
ENSMUSG00000002320	ENSMUST00000002391,ENSMUST00000120041,ENSMUST00000121791,ENSMUST00000121937,ENSMUST00000122358,ENSMUST00000127473,ENSMUST00000130167,ENSMUST00000132338,ENSMUST00000133707,ENSMUST00000138085,ENSMUST00000139313,ENSMUST00000146588,ENSMUST00000149726	1943.52	1893.52	4.77	4.29	4.39	4.12	4.52	5.4	12.79	10.54	15.36	10.08	11.33	9.79
ENSMUSG00000002324	ENSMUST00000002395,ENSMUST00000141425,ENSMUST00000155193,ENSMUST00000227922	1655.5	1605.5	1.15	0.97	1.41	1.43	1.26	1.64	4.35	5.08	3.41	4.25	3.87	1.72
ENSMUSG00000002325	ENSMUST00000126269,ENSMUST00000130697,ENSMUST00000134863,ENSMUST00000136109,ENSMUST00000138037,ENSMUST00000145680,ENSMUST00000226275	2159.24	2109.24	2.37	12.53	13.69	2.53	12.38	13.18	5.88	54.4	49.1	4.66	41.01	30.09
ENSMUSG00000002326	ENSMUST00000002397,ENSMUST00000226735,ENSMUST00000226787,ENSMUST00000227178,ENSMUST00000227696,ENSMUST00000227914	1529.17	1479.17	2.72	2.34	2.16	2.32	2.22	2.65	7.7	6.79	8.64	5.84	7.12	5.51
ENSMUSG00000002329	ENSMUST00000002400,ENSMUST00000226659,ENSMUST00000228093	1573.97	1523.97	7.63	7.29	7.3	8.33	7.36	6.96	19.08	20.12	19.02	12.18	17.1	10.96
ENSMUSG00000002332	ENSMUST00000002403,ENSMUST00000128802,ENSMUST00000142043,ENSMUST00000155969	1113.4	1063.4	4.42	3.8	3.82	4.05	3.43	3.73	6.88	8.26	5.17	5.26	5.93	3.75
ENSMUSG00000002341	ENSMUST00000002412	7195	7145	0.16	0.1	0.14	0.14	0.12	0.14	0.61	0.89	0.4	0.48	0.54	0.25
ENSMUSG00000002342	ENSMUST00000002413,ENSMUST00000123923,ENSMUST00000125755,ENSMUST00000125906,ENSMUST00000126268,ENSMUST00000133084,ENSMUST00000133339,ENSMUST00000143543,ENSMUST00000147656,ENSMUST00000149105,ENSMUST00000182365,ENSMUST00000182715,ENSMUST00000182942,ENSMUST00000182980	1362.08	1312.08	7.17	7.72	4.69	6.91	4.37	4.96	13.68	16.72	12.56	8.97	11.47	7.53
ENSMUSG00000002343	ENSMUST00000019679,ENSMUST00000130319,ENSMUST00000135931,ENSMUST00000136666,ENSMUST00000139765,ENSMUST00000147387	1960.27	1910.27	3.84	3.87	4.53	5.18	3.69	3.76	13.81	11.75	17.56	7.35	10.92	12.67
ENSMUSG00000002345	ENSMUST00000002418,ENSMUST00000110139,ENSMUST00000123760,ENSMUST00000123976,ENSMUST00000129668	740.8	690.8	6.55	5.47	5.38	7.49	5.24	5.66	14.58	15.19	14.56	8.87	13.57	8.8
ENSMUSG00000002346	ENSMUST00000063788,ENSMUST00000110127,ENSMUST00000134596,ENSMUST00000139333,ENSMUST00000150706	2453.77	2403.77	1.13	0.8	1.17	1.09	0.82	1.13	3.33	4.16	3.35	2.29	2.6	2.01
ENSMUSG00000002365	ENSMUST00000002436,ENSMUST00000231803	3331	3281	1.23	1.15	1.01	1.27	1.25	1.15	4.77	6.57	4.13	3.52	3.79	2.61
ENSMUSG00000002372	ENSMUST00000002445	2511	2461	14.51	13.55	14.65	15.64	12.69	14.4	38.71	53.93	50.98	28.87	38.93	30.22
ENSMUSG00000002379	ENSMUST00000002452	2661	2611	10.09	9.78	9.03	10.46	8.44	9.27	18.33	14.28	22.38	12.75	17.39	12.51
ENSMUSG00000002384	ENSMUST00000002457,ENSMUST00000151850	2302.23	2252.23	0.05	0.01	0.05	0.06	0.03	0.07	0.22	0.37	0.26	0.18	0.25	0.14
ENSMUSG00000002393	ENSMUST00000002466,ENSMUST00000124732,ENSMUST00000127443,ENSMUST00000132630,ENSMUST00000137058,ENSMUST00000137734,ENSMUST00000155463,ENSMUST00000156270	1628.4	1578.4	5.07	4.7	4.81	6.44	5.02	4.77	14.61	18.78	16.38	11.66	13.19	7.87
ENSMUSG00000002395	ENSMUST00000019169,ENSMUST00000110053,ENSMUST00000110054,ENSMUST00000127517,ENSMUST00000136368,ENSMUST00000137137,ENSMUST00000139541,ENSMUST00000140236,ENSMUST00000142685,ENSMUST00000143657,ENSMUST00000146221,ENSMUST00000154550	823.38	773.38	25.66	21.64	22.6	25.48	20.38	23.74	62.46	55.17	72.26	45.77	58.2	43.67
ENSMUSG00000002396	ENSMUST00000002469,ENSMUST00000110051,ENSMUST00000110052,ENSMUST00000126049	1386.2	1336.2	2.12	1.92	2.05	2.14	1.63	2.34	5.66	5.32	5.69	3.74	4.9	2.65
ENSMUSG00000002409	ENSMUST00000085901,ENSMUST00000172467,ENSMUST00000172761	2214.13	2164.13	0.71	0.48	0.85	0.76	0.67	0.77	3.31	5.6	2.76	1.96	3.41	1.57
ENSMUSG00000002413	ENSMUST00000002487,ENSMUST00000101497,ENSMUST00000167073,ENSMUST00000167169,ENSMUST00000169647	5513.24	5463.24	2.66	2	2.44	2.54	1.9	2.65	14.56	24.82	11.19	9.6	12.29	5.48
ENSMUSG00000002416	ENSMUST00000002490,ENSMUST00000119379,ENSMUST00000128064,ENSMUST00000135239,ENSMUST00000135671,ENSMUST00000146793	496.71	446.71	29.43	30.17	29.06	31.14	27.59	26.59	78.03	66.54	98.1	59.46	72.14	56.39
ENSMUSG00000002428	ENSMUST00000002502,ENSMUST00000128127,ENSMUST00000143005,ENSMUST00000145853,ENSMUST00000154233,ENSMUST00000155635	3876.64	3826.64	10.29	9.31	8.62	11.51	9.3	8.04	32.29	55.53	33.32	23.39	31.08	20.18
ENSMUSG00000002455	ENSMUST00000002529,ENSMUST00000132714,ENSMUST00000136481,ENSMUST00000139955	3049.37	2999.37	13.29	11.19	11.3	13.14	11.27	12.14	33.25	38.11	36.7	23.68	30.02	21.93
ENSMUSG00000002458	ENSMUST00000002532,ENSMUST00000108769,ENSMUST00000108771,ENSMUST00000108772,ENSMUST00000108776,ENSMUST00000108778,ENSMUST00000108779,ENSMUST00000124776,ENSMUST00000130712,ENSMUST00000143510,ENSMUST00000144476,ENSMUST00000165416	852.23	802.23	5.13	3.54	3.96	4.07	2.97	3.99	10.87	10.27	10.35	7.51	10.13	6.63
ENSMUSG00000002459	ENSMUST00000002533,ENSMUST00000118000,ENSMUST00000119256,ENSMUST00000133521,ENSMUST00000147158,ENSMUST00000156289,ENSMUST00000170566	1499.35	1449.35	0.12	0.03	0.08	0.06	0.05	0.02	0.19	0.23	0.1	0.2	0.16	0.14
ENSMUSG00000002475	ENSMUST00000002549,ENSMUST00000117726,ENSMUST00000117828,ENSMUST00000144150	1885	1835	0.38	0.35	0.32	0.4	0.32	0.33	1.05	1.17	0.57	0.78	1.16	0.39
ENSMUSG00000002477	ENSMUST00000002551	837	787	48.39	43.2	42.84	42.9	44.12	43.28	115.59	95.89	124.22	79.93	92.43	77.89
ENSMUSG00000002486	ENSMUST00000094441,ENSMUST00000112199,ENSMUST00000124242,ENSMUST00000128625,ENSMUST00000131679,ENSMUST00000152999,ENSMUST00000202105,ENSMUST00000202252	2293.5	2243.5	1.95	1.76	2.09	2.11	1.7	2.08	7.07	9.7	9.17	5.05	5.89	5.75
ENSMUSG00000002489	ENSMUST00000002588,ENSMUST00000089084,ENSMUST00000114122,ENSMUST00000114124,ENSMUST00000124433,ENSMUST00000130951,ENSMUST00000134021,ENSMUST00000136760,ENSMUST00000139544,ENSMUST00000144691,ENSMUST00000151655,ENSMUST00000155915,ENSMUST00000163370,ENSMUST00000164263,ENSMUST00000178095	5146.2	5096.2	5.26	4.42	6.65	6.7	4.19	6.58	21.24	27.49	15.68	14.2	20.09	10.72
ENSMUSG00000002496	ENSMUST00000097373,ENSMUST00000226242,ENSMUST00000226284,ENSMUST00000226309,ENSMUST00000226398,ENSMUST00000226428,ENSMUST00000226473,ENSMUST00000226691,ENSMUST00000226985,ENSMUST00000227094,ENSMUST00000227330,ENSMUST00000227432,ENSMUST00000227509,ENSMUST00000227543,ENSMUST00000227607,ENSMUST00000227658,ENSMUST00000227745,ENSMUST00000227754,ENSMUST00000227804,ENSMUST00000228220,ENSMUST00000228412,…	3480.33	3430.33	6.32	6.13	9.14	8.21	6.42	8.36	39.49	56.32	39.88	25.02	30.54	22.05
ENSMUSG00000002500	ENSMUST00000045186,ENSMUST00000170239,ENSMUST00000183214	1086.54	1036.54	0.37	0.23	0.2	0.18	0.22	0.16	0.38	0.22	0.12	0.18	0.21	0.2
ENSMUSG00000002504	ENSMUST00000002572,ENSMUST00000019684	1967.23	1917.23	5.83	4.52	5.24	5.77	4.88	4.75	12.77	12.4	11.78	8.76	10.2	6.51
ENSMUSG00000002524	ENSMUST00000002599,ENSMUST00000100527,ENSMUST00000227251,ENSMUST00000227316,ENSMUST00000228459,ENSMUST00000229030,ENSMUST00000229474,ENSMUST00000229496,ENSMUST00000230143,ENSMUST00000230924,ENSMUST00000230968	1671.63	1621.63	29.2	27.7	29.78	33.18	28.01	29.32	79.95	88.34	96.81	56.23	80.02	58.13
ENSMUSG00000002546	ENSMUST00000081670,ENSMUST00000100194,ENSMUST00000113377,ENSMUST00000126276,ENSMUST00000127276,ENSMUST00000129193,ENSMUST00000131712,ENSMUST00000139494,ENSMUST00000146544,ENSMUST00000147707,ENSMUST00000149141	3971.21	3921.21	2.69	3.24	3.8	3.25	3.17	3.97	12.69	17.05	12.36	6.98	10.99	7.32
ENSMUSG00000002550	ENSMUST00000002625,ENSMUST00000133804,ENSMUST00000134351,ENSMUST00000138133,ENSMUST00000142797	1390.5	1340.5	6.6	6.11	6.67	8.69	4.97	7.16	14.74	19	20.23	12.21	15.14	11.41
ENSMUSG00000002565	ENSMUST00000002640,ENSMUST00000078481	2995	2945	0.03	0.03	0.04	0.05	0.03	0.08	0.1	0.06	0.17	0.07	0.17	0.09
ENSMUSG00000002578	ENSMUST00000133342,ENSMUST00000221022,ENSMUST00000221150,ENSMUST00000222067,ENSMUST00000222899,ENSMUST00000222901,ENSMUST00000223145,ENSMUST00000223162	1546	1496	0.2	0.14	0.06	0.1	0.07	0.22	0.41	0.39	0.59	0.23	0.5	0.27
ENSMUSG00000002580	ENSMUST00000002655	747	697	6.92	5.23	5.27	6.48	4.98	5.72	17.77	8.83	19.9	13.28	15.33	13
ENSMUSG00000002588	ENSMUST00000002663,ENSMUST00000176933,ENSMUST00000176945,ENSMUST00000177159	903.5	853.5	0.06	0.03	0	0.03	0.03	0	0.04	0	0	0	0	0
ENSMUSG00000002602	ENSMUST00000002677,ENSMUST00000085948,ENSMUST00000124442,ENSMUST00000132038,ENSMUST00000132989,ENSMUST00000137211,ENSMUST00000137383,ENSMUST00000147680	2980.16	2930.16	0.51	0.55	0.94	0.63	0.91	1	2.38	1.9	3.48	2.03	2.05	2.08
ENSMUSG00000002603	ENSMUST00000002678,ENSMUST00000169009,ENSMUST00000171757,ENSMUST00000206348,ENSMUST00000206584	1723.3	1673.3	0.77	0.72	0.98	1.06	0.68	1.13	2.33	2.04	2.14	1.95	1.56	1.46
ENSMUSG00000002608	ENSMUST00000002683,ENSMUST00000125699,ENSMUST00000129429,ENSMUST00000129519,ENSMUST00000134201,ENSMUST00000137046,ENSMUST00000140847,ENSMUST00000154143,ENSMUST00000156365	1531.68	1481.68	2.08	1.35	1.65	1.74	1.34	1.59	6.48	10.23	7.03	5.22	6.61	5.1
ENSMUSG00000002617	ENSMUST00000037057,ENSMUST00000135840,ENSMUST00000140313,ENSMUST00000142999,ENSMUST00000151447,ENSMUST00000172177	2839.76	2789.76	1.7	1.45	1.56	1.83	1.28	1.6	5.08	9.31	4.74	4.07	4.7	2.79
ENSMUSG00000002625	ENSMUST00000050214	2075	2025	7.86	7.02	7.19	8.09	6.51	7.19	22.49	27.66	20.45	16.66	19.47	12.77
ENSMUSG00000002633	ENSMUST00000002708	2847	2797	0.03	0.01	0	0.02	0	0	0	0	0.01	0	0.02	0.01
ENSMUSG00000002635	ENSMUST00000002710,ENSMUST00000125803,ENSMUST00000148381,ENSMUST00000206088	1091.64	1041.64	14.17	12.3	11.55	14.56	11.25	12.74	26.26	23.87	27.33	17.54	25.86	17.18
ENSMUSG00000002658	ENSMUST00000002733	1717	1667	16.48	14.84	16.35	17.3	14.08	15.91	40.7	49.87	56.22	27.38	39.16	34.77
ENSMUSG00000002660	ENSMUST00000002735	1207	1157	15.45	11.8	13.36	15.61	12.85	13.55	30.07	23.13	37.89	22.19	25.47	22.92
ENSMUSG00000002661	ENSMUST00000002737,ENSMUST00000074141,ENSMUST00000149632	865.83	815.83	10.31	9.24	9.51	9.49	8.78	8.1	17.56	13.81	17.48	13.18	15.47	11.58
ENSMUSG00000002664	ENSMUST00000002740	474	424	0.04	0	0	0	0.04	0	0	0	0	0	0.13	0
ENSMUSG00000002668	ENSMUST00000011623	2520	2470	0.14	0.11	0.26	0.21	0.17	0.17	1.1	0.94	0.73	0.58	0.68	0.43
ENSMUSG00000002679	ENSMUST00000002756,ENSMUST00000159187,ENSMUST00000160739,ENSMUST00000161211,ENSMUST00000161598,ENSMUST00000161902	976.13	926.13	14	12.47	12.52	13.83	13.68	12.63	35.93	54.07	44.37	25.3	38.8	26.78
ENSMUSG00000002688	ENSMUST00000002765	3653	3603	0.23	0.26	0.25	0.3	0.19	0.26	1.08	1.13	0.73	0.7	0.76	0.39
ENSMUSG00000002699	ENSMUST00000052413,ENSMUST00000109329,ENSMUST00000133120,ENSMUST00000146318	2066	2016	0.03	0	0.01	0.02	0.1	0.06	0.01	0	0.04	0	0	0
ENSMUSG00000002718	ENSMUST00000002790,ENSMUST00000129061,ENSMUST00000132402,ENSMUST00000135139,ENSMUST00000145819,ENSMUST00000163437,ENSMUST00000163917,ENSMUST00000164974,ENSMUST00000166871,ENSMUST00000168599,ENSMUST00000169290,ENSMUST00000171410	3106.93	3056.93	34.91	28.53	31.24	34.72	30.27	34.52	93.61	115.36	102.66	67.03	85.36	68.34
ENSMUSG00000002728	ENSMUST00000002805,ENSMUST00000110000,ENSMUST00000129502,ENSMUST00000134759,ENSMUST00000136330,ENSMUST00000149461,ENSMUST00000150316,ENSMUST00000165635,ENSMUST00000169732	1107.17	1057.17	20.49	20.14	29.29	21.84	21	28.97	49.38	67.97	87.81	36.18	53.34	54.66
ENSMUSG00000002731	ENSMUST00000002808,ENSMUST00000140493	1562.61	1512.61	3.48	3.74	3.35	3.35	3.14	3.04	11.07	8.7	8.01	8.18	9.94	5.56
ENSMUSG00000002732	ENSMUST00000002809,ENSMUST00000147355,ENSMUST00000154097,ENSMUST00000176815	860	810	0.76	0.6	0.6	0.61	0.75	0.75	2.37	1.69	2.15	1.7	1.85	0.54
ENSMUSG00000002733	ENSMUST00000111920,ENSMUST00000125119	2489.61	2439.61	3.57	2.86	3.71	3.66	3.43	3.71	9.55	13.72	10.62	8.87	9.94	6.38
ENSMUSG00000002741	ENSMUST00000002818,ENSMUST00000143834	2495.15	2445.15	8.12	8.09	8.22	9.31	8.03	7.99	22.44	24.07	29.96	17.16	22.31	17.51
ENSMUSG00000002748	ENSMUST00000002825,ENSMUST00000136947,ENSMUST00000142307,ENSMUST00000176793,ENSMUST00000201894	6022.86	5972.86	12.71	11.93	12.07	14.41	12.16	11.6	46.36	89.39	49.03	35.99	48.56	31.33
ENSMUSG00000002763	ENSMUST00000002840,ENSMUST00000127897,ENSMUST00000144964,ENSMUST00000148872	3153.24	3103.24	1.01	0.98	1.05	1.22	0.83	1.03	4.49	6.65	5.06	3.73	4.07	2.52
ENSMUSG00000002767	ENSMUST00000002844,ENSMUST00000113429,ENSMUST00000113430,ENSMUST00000146183,ENSMUST00000156464	971.55	921.55	36.05	36.34	31.67	39.05	29.78	32.52	76.73	73.69	83.64	53.43	66.2	46.94
ENSMUSG00000002768	ENSMUST00000002845	840	790	13.9	11.91	12.31	13.74	10.53	13.51	37.2	35.21	36.68	26.24	33.81	24.92
ENSMUSG00000002769	ENSMUST00000002846,ENSMUST00000147112	1035	985	0.41	0.57	0.44	0.37	0.53	0.47	0.6	1.01	0.5	0.39	0.84	0.24
ENSMUSG00000002771	ENSMUST00000002848,ENSMUST00000211250,ENSMUST00000211713	4062.66	4012.66	0.07	0.01	0.03	0.03	0.01	0.02	0.08	0.03	0.09	0.1	0.08	0.08
ENSMUSG00000002778	ENSMUST00000002855,ENSMUST00000211152,ENSMUST00000211234,ENSMUST00000211495,ENSMUST00000211716	1318.31	1268.31	10.78	8.87	11.16	9.57	7.88	9.81	26.63	26.49	23.59	19.07	18.46	14.76
ENSMUSG00000002781	ENSMUST00000069772,ENSMUST00000209292,ENSMUST00000209350,ENSMUST00000209395,ENSMUST00000209580,ENSMUST00000210044,ENSMUST00000210503,ENSMUST00000210574,ENSMUST00000210692,ENSMUST00000211280	1377.27	1327.27	6.65	5.47	5.98	6.2	5.34	4.38	11.1	9.89	9.68	8.9	9.51	5.37
ENSMUSG00000002791	ENSMUST00000159650,ENSMUST00000160550,ENSMUST00000183934	1118.51	1068.51	0.07	0.07	0	0	0.01	0.03	0.06	0.07	0.03	0.09	0.11	0.04
ENSMUSG00000002797	ENSMUST00000002874,ENSMUST00000131475,ENSMUST00000136527,ENSMUST00000203208,ENSMUST00000204301,ENSMUST00000204770	830.19	780.19	4.19	3.23	3.28	3.9	3.64	4.22	14.8	11.89	13.61	10.4	12.69	9.96
ENSMUSG00000002799	ENSMUST00000075827,ENSMUST00000220771,ENSMUST00000220855,ENSMUST00000221320,ENSMUST00000221454,ENSMUST00000221647,ENSMUST00000221696,ENSMUST00000222402,ENSMUST00000223140,ENSMUST00000223304	3109.68	3059.68	3.88	3.39	3.99	4.46	3.61	3.48	15.39	17.83	12.12	12.48	10.57	6.87
ENSMUSG00000002803	ENSMUST00000002880,ENSMUST00000165079,ENSMUST00000220567,ENSMUST00000221104,ENSMUST00000221500,ENSMUST00000222209,ENSMUST00000223287,ENSMUST00000223368,ENSMUST00000223508	1724.98	1674.98	1.66	1.37	1.47	1.81	1.17	1.36	4.45	3.28	3.64	2.11	2.87	2
ENSMUSG00000002804	ENSMUST00000002881,ENSMUST00000221397,ENSMUST00000221497,ENSMUST00000222793,ENSMUST00000222932	887.38	837.38	4.73	5.04	5.86	5.56	4.99	5.86	17.44	10.95	14.83	11.8	15.65	10.1
ENSMUSG00000002808	ENSMUST00000002885,ENSMUST00000220755,ENSMUST00000220944,ENSMUST00000221014	2088.27	2038.27	1.94	1.66	2.04	1.97	1.45	1.7	5.35	5.68	3.98	3.53	3.7	2.45
ENSMUSG00000002812	ENSMUST00000002889,ENSMUST00000137226,ENSMUST00000154141,ENSMUST00000154465	3630.02	3580.02	7.27	7.09	7.72	8.88	6.87	8.48	22.73	28.32	20.29	16.59	20.17	13.05
ENSMUSG00000002814	ENSMUST00000002891,ENSMUST00000102668,ENSMUST00000117743,ENSMUST00000120417,ENSMUST00000124799,ENSMUST00000130068	3241.78	3191.78	3.65	2.98	4.25	3.16	3.5	3.79	10.84	13.65	10.39	7.15	10.84	6.6
ENSMUSG00000002820	ENSMUST00000065005,ENSMUST00000215767,ENSMUST00000216826,ENSMUST00000217269,ENSMUST00000217591	1617.69	1567.69	6.36	6.74	6.6	8.2	6.06	7.29	19.15	21.84	18.52	15.28	21.66	13.69
ENSMUSG00000002825	ENSMUST00000002902,ENSMUST00000213718,ENSMUST00000213967,ENSMUST00000214101,ENSMUST00000214128,ENSMUST00000214681,ENSMUST00000214900,ENSMUST00000216277,ENSMUST00000216527,ENSMUST00000217060,ENSMUST00000217188	950.92	900.92	18.32	15.72	14.98	18.4	14.88	14.57	38.04	44.6	45.19	29.73	47.04	28.58
ENSMUSG00000002831	ENSMUST00000002908,ENSMUST00000190703	5756	5706	0.02	0.03	0.03	0.07	0.04	0.04	0.18	0.56	0.06	0.13	0.12	0.07
ENSMUSG00000002833	ENSMUST00000002911,ENSMUST00000224078,ENSMUST00000224101,ENSMUST00000224172,ENSMUST00000224655,ENSMUST00000224701,ENSMUST00000225208,ENSMUST00000225342,ENSMUST00000225731,ENSMUST00000225843,ENSMUST00000226035,ENSMUST00000226053	2017.99	1967.99	23.91	19.34	22.78	24.77	19.79	21.95	70.76	85.63	74.89	49.45	66.99	47.2
ENSMUSG00000002835	ENSMUST00000002914	3308	3258	8.96	7.87	8.47	9.48	8.36	8.46	33.02	43.68	35.67	24	29.83	22.74
ENSMUSG00000002844	ENSMUST00000002923,ENSMUST00000232145	2746.31	2696.31	7.33	7.1	7.61	7.79	6.77	8.52	15.32	12.08	17.74	11.16	11.95	10
ENSMUSG00000002845	ENSMUST00000002924,ENSMUST00000163133,ENSMUST00000163549,ENSMUST00000163884,ENSMUST00000163948,ENSMUST00000165140,ENSMUST00000165631,ENSMUST00000166235,ENSMUST00000166854,ENSMUST00000167033,ENSMUST00000169554,ENSMUST00000170097,ENSMUST00000171064,ENSMUST00000171687	1370.79	1320.79	22.55	20.23	27.39	23.97	20.26	27.79	61.78	75.05	67.46	46.84	51.35	40.05
ENSMUSG00000002846	ENSMUST00000002925,ENSMUST00000147543	1421.79	1371.79	4.54	4.41	5	5.23	3.89	4.39	13.5	15.26	13.12	9.94	12.68	8.5
ENSMUSG00000002847	ENSMUST00000002926,ENSMUST00000232224	1974	1924	3.23	2.7	3.56	3.31	2.84	3.9	4.89	5.59	4.49	2.99	4.58	3.24
ENSMUSG00000002870	ENSMUST00000058011,ENSMUST00000203172,ENSMUST00000203935,ENSMUST00000204217,ENSMUST00000204365,ENSMUST00000204393,ENSMUST00000205165	2972.79	2922.79	50.46	44.74	45.99	53.75	45.78	45.06	139.66	198.37	159.82	104.97	132.64	99.93
ENSMUSG00000002871	ENSMUST00000055022,ENSMUST00000123257,ENSMUST00000128171,ENSMUST00000128790,ENSMUST00000129979,ENSMUST00000135778,ENSMUST00000138415,ENSMUST00000141163,ENSMUST00000144405,ENSMUST00000148874,ENSMUST00000150236,ENSMUST00000151379,ENSMUST00000152045,ENSMUST00000152585,ENSMUST00000153874,ENSMUST00000153885,ENSMUST00000203155,ENSMUST00000203185,ENSMUST00000203345,ENSMUST00000203648,ENSMUST00000203694,…	1066.62	1016.62	2.22	1.72	2.24	2.46	1.86	3.29	6.71	8.34	6.8	5.15	6.12	3.53
ENSMUSG00000002881	ENSMUST00000069792,ENSMUST00000167732,ENSMUST00000168082,ENSMUST00000170269,ENSMUST00000186764	2437.01	2387.01	1.59	1.32	1.35	1.46	1.31	1.43	4.42	5.7	5.57	3.63	3.67	2.45
ENSMUSG00000002885	ENSMUST00000002964,ENSMUST00000075843,ENSMUST00000109802,ENSMUST00000139797,ENSMUST00000140606,ENSMUST00000149368,ENSMUST00000154075,ENSMUST00000166939	2290.37	2240.37	1.96	1.35	1.64	1.71	1.41	1.44	7.17	7.6	4.65	4.44	6.27	2.04
ENSMUSG00000002897	ENSMUST00000002976,ENSMUST00000204078,ENSMUST00000204239	2989.87	2939.87	1.28	0.73	1.07	0.84	0.87	1.11	2.19	3.35	2.46	1.58	2.98	1.32
ENSMUSG00000002900	ENSMUST00000002979,ENSMUST00000164009,ENSMUST00000164228,ENSMUST00000169065,ENSMUST00000169088,ENSMUST00000170495,ENSMUST00000172134	5367.71	5317.71	5.71	5.13	5.08	5.7	5.04	5.17	36.74	45.04	38.51	27.38	37.71	24.42
ENSMUSG00000002908	ENSMUST00000110078,ENSMUST00000110081,ENSMUST00000212084,ENSMUST00000212086,ENSMUST00000212243,ENSMUST00000212414,ENSMUST00000212509,ENSMUST00000212611	2835.7	2785.7	1.26	1.19	1.37	1.34	1.05	1.61	4.42	3.49	3.35	2.46	2.33	1.94
ENSMUSG00000002910	ENSMUST00000002989,ENSMUST00000212405,ENSMUST00000212508,ENSMUST00000212770,ENSMUST00000212855,ENSMUST00000212898,ENSMUST00000213095	1804.41	1754.41	4.72	4.36	4.51	6.15	3.6	4.31	15.94	15.64	15.3	11.44	11.31	8.21
ENSMUSG00000002930	ENSMUST00000052827	1757	1707	0.01	0	0.01	0.02	0.01	0.02	0	0	0	0	0	0
ENSMUSG00000002944	ENSMUST00000082367,ENSMUST00000165232,ENSMUST00000169095,ENSMUST00000170051,ENSMUST00000197574,ENSMUST00000197890	2564	2514	0.01	0	0.03	0.01	0.02	0	0.03	0	0	0	0	0
ENSMUSG00000002948	ENSMUST00000003027,ENSMUST00000062686,ENSMUST00000110994,ENSMUST00000110995,ENSMUST00000110996,ENSMUST00000110998,ENSMUST00000110999,ENSMUST00000129537,ENSMUST00000129866,ENSMUST00000207247	1999.7	1949.7	4.93	4.66	6.41	5.36	4.07	4.59	19.38	16.58	17.33	10.17	16.93	12.1
ENSMUSG00000002949	ENSMUST00000003029,ENSMUST00000135755,ENSMUST00000141195,ENSMUST00000147831,ENSMUST00000148672,ENSMUST00000149827,ENSMUST00000160371,ENSMUST00000160549,ENSMUST00000161143	1505.34	1455.34	14.97	11.47	10.84	15.13	12.79	13.06	41.52	59.21	40.05	31.15	39.06	26.55
ENSMUSG00000002957	ENSMUST00000003038,ENSMUST00000201261,ENSMUST00000201320	4511.51	4461.51	14.32	12.56	15.78	15.9	12.84	15.25	42.79	40.74	41.34	29.5	35.91	25.86
ENSMUSG00000002963	ENSMUST00000003044,ENSMUST00000098478,ENSMUST00000107876,ENSMUST00000123015,ENSMUST00000124168,ENSMUST00000126860,ENSMUST00000139003,ENSMUST00000144669,ENSMUST00000145850,ENSMUST00000152747,ENSMUST00000154968,ENSMUST00000155050,ENSMUST00000200892,ENSMUST00000201882,ENSMUST00000202646,ENSMUST00000208385,ENSMUST00000208666	1555.66	1505.66	7.83	9.07	7.86	8.49	8.03	7.68	17.44	19.41	18.95	10.98	19.15	10.73
ENSMUSG00000002968	ENSMUST00000003049,ENSMUST00000123130,ENSMUST00000207196,ENSMUST00000207206,ENSMUST00000207278,ENSMUST00000207490,ENSMUST00000207654,ENSMUST00000207788,ENSMUST00000207848,ENSMUST00000208253,ENSMUST00000208551,ENSMUST00000208552,ENSMUST00000208556,ENSMUST00000209191	1738.29	1688.29	13.66	12.4	14.44	14.19	12.2	16.69	37.46	42.7	34.4	22.8	33.46	24.54
ENSMUSG00000002980	ENSMUST00000003061,ENSMUST00000133271,ENSMUST00000133427,ENSMUST00000135632,ENSMUST00000155244	2257.42	2207.42	7.06	6.41	8.04	7.8	5.6	7.41	33.3	41.53	43.77	25.48	30.14	25.68
ENSMUSG00000002981	ENSMUST00000055242,ENSMUST00000207704,ENSMUST00000208174,ENSMUST00000208215,ENSMUST00000208554,ENSMUST00000208594,ENSMUST00000208599,ENSMUST00000208846,ENSMUST00000208868	2371.46	2321.46	10.19	10.5	12.87	12.13	9.82	12.38	30.6	30.77	32	22.8	28.34	20.32
ENSMUSG00000002983	ENSMUST00000049912,ENSMUST00000094762,ENSMUST00000098754,ENSMUST00000130543,ENSMUST00000131759,ENSMUST00000137615,ENSMUST00000141586,ENSMUST00000148040,ENSMUST00000153309,ENSMUST00000208087	1742.88	1692.88	4.07	3.33	3.87	4.4	3.88	3.72	9.38	13.04	6.87	6.82	10.08	4.65
ENSMUSG00000002984	ENSMUST00000032555,ENSMUST00000093552,ENSMUST00000172705,ENSMUST00000173966,ENSMUST00000174476,ENSMUST00000208286	1538.91	1488.91	27.4	23.15	31.99	27.98	24.23	31.37	83.64	101.94	100.86	58.3	79.31	62
ENSMUSG00000002985	ENSMUST00000003066,ENSMUST00000167646,ENSMUST00000172808,ENSMUST00000172983,ENSMUST00000173739,ENSMUST00000174064,ENSMUST00000174144,ENSMUST00000174191,ENSMUST00000174355,ENSMUST00000174710,ENSMUST00000207525	1051.63	1001.63	254.82	228.11	235.53	265.38	223.62	240.87	497.92	441.55	422.36	348.26	389.47	252.64
ENSMUSG00000002992	ENSMUST00000003074,ENSMUST00000134116,ENSMUST00000142352	569	519	0.14	0.11	0.04	0.06	0.03	0.18	0.14	0.76	0.17	0.28	0.05	0.1
ENSMUSG00000002996	ENSMUST00000167458,ENSMUST00000172314,ENSMUST00000175666,ENSMUST00000175686,ENSMUST00000176084,ENSMUST00000176103,ENSMUST00000176138,ENSMUST00000176520,ENSMUST00000176643	2551.46	2501.46	16.83	14.4	17.36	18.05	14.99	15.52	37.16	39.11	28.3	26.5	29.53	17.24
ENSMUSG00000002997	ENSMUST00000003079,ENSMUST00000036497,ENSMUST00000146865	2345.02	2295.02	0.47	0.48	0.43	0.44	0.39	0.44	2.32	3.33	1.17	1.61	2.02	0.67
ENSMUSG00000003031	ENSMUST00000003115,ENSMUST00000067327,ENSMUST00000204807	2840.84	2790.84	16.92	16.38	18.37	18.21	17.68	18.54	41.7	34.81	34.21	31.33	32.48	23.1
ENSMUSG00000003032	ENSMUST00000107619,ENSMUST00000129250,ENSMUST00000132746	2712.99	2662.99	9.01	8.36	7.07	9.14	9.4	8.37	30.15	40.69	22.82	20.39	34.16	15.6
ENSMUSG00000003033	ENSMUST00000003117,ENSMUST00000126885,ENSMUST00000145213,ENSMUST00000151546,ENSMUST00000156735,ENSMUST00000212708,ENSMUST00000212841,ENSMUST00000212940	1772.22	1722.22	3.69	2.86	3.59	3.71	3.15	4.42	11.72	12.2	11.97	8.08	9.67	8.64
ENSMUSG00000003037	ENSMUST00000003121,ENSMUST00000128203,ENSMUST00000135613	1754.78	1704.78	12.28	9.73	10.92	12.59	10.54	11.54	23.63	30.64	32.09	16.43	25.96	21.01
ENSMUSG00000003038	ENSMUST00000100472,ENSMUST00000102552,ENSMUST00000102553,ENSMUST00000105893,ENSMUST00000123234,ENSMUST00000125266,ENSMUST00000130809,ENSMUST00000136327,ENSMUST00000136859,ENSMUST00000137456,ENSMUST00000138458,ENSMUST00000145025,ENSMUST00000153622	1260.68	1210.68	21.52	20.81	20.35	21.17	21.09	21.9	70.63	81.89	101.41	52.92	76.53	61.61
ENSMUSG00000003039	ENSMUST00000003123,ENSMUST00000212117	2725.75	2675.75	7.45	6.93	7.2	7.91	6.52	7.01	19.91	23.25	26.57	14.68	18.95	15.9
ENSMUSG00000003051	ENSMUST00000003135,ENSMUST00000185752,ENSMUST00000188895	1721.2	1671.2	1.67	0.79	2.53	1.48	1.13	1.65	8.88	5.93	6.15	4.61	4.79	3.92
ENSMUSG00000003053	ENSMUST00000003137,ENSMUST00000176624,ENSMUST00000177087	2328.67	2278.67	0.03	0.03	0.03	0.03	0.03	0.03	0.1	0.15	0.1	0.09	0.1	0.08
ENSMUSG00000003062	ENSMUST00000039694,ENSMUST00000196268,ENSMUST00000196537,ENSMUST00000196712,ENSMUST00000197565,ENSMUST00000199278,ENSMUST00000199924,ENSMUST00000200323,ENSMUST00000221380,ENSMUST00000222869	1244.06	1194.06	17.89	15.43	16.7	18.3	15.63	17.47	51.75	36.72	51.68	39.92	41.59	33.35
ENSMUSG00000003068	ENSMUST00000003152,ENSMUST00000105370,ENSMUST00000105371,ENSMUST00000128992,ENSMUST00000129235,ENSMUST00000144108,ENSMUST00000144119,ENSMUST00000144883,ENSMUST00000152592,ENSMUST00000213772	1913.73	1863.73	13.13	13.43	14.34	16.34	13.11	13.5	47.54	65.26	55.78	36.26	50.88	32.92
ENSMUSG00000003070	ENSMUST00000003154	2131	2081	0.52	0.35	0.56	0.5	0.4	0.38	1.93	1.1	0.95	0.95	1.12	0.7
ENSMUSG00000003072	ENSMUST00000003156,ENSMUST00000105366,ENSMUST00000105367,ENSMUST00000150347	882.94	832.94	24.36	20.38	24.26	23.26	21.68	24.45	55.87	43.52	48.74	34.89	44.69	31.82
ENSMUSG00000003099	ENSMUST00000003183,ENSMUST00000124573,ENSMUST00000127311,ENSMUST00000138353,ENSMUST00000142597,ENSMUST00000142831,ENSMUST00000145997,ENSMUST00000146920,ENSMUST00000153242,ENSMUST00000154880,ENSMUST00000156366	1485.71	1435.71	9.46	8.4	11.9	9.97	8.76	11.97	36.42	37.08	36.84	22.58	29.98	23.41
ENSMUSG00000003119	ENSMUST00000003203,ENSMUST00000107538,ENSMUST00000107539,ENSMUST00000125152,ENSMUST00000145113,ENSMUST00000147441	4578.43	4528.43	7.02	6.47	7.58	8.09	6.64	7.13	36.55	69.77	37.61	24.88	39.5	23.55
ENSMUSG00000003123	ENSMUST00000003207,ENSMUST00000054301,ENSMUST00000105177,ENSMUST00000149349,ENSMUST00000205698,ENSMUST00000205923,ENSMUST00000206588,ENSMUST00000206861	3115.61	3065.61	1.14	0.95	1.21	1.4	0.77	1.02	2.9	3.01	2.86	1.73	2.29	1.89
ENSMUSG00000003131	ENSMUST00000172450,ENSMUST00000213853,ENSMUST00000214179,ENSMUST00000214996,ENSMUST00000215060,ENSMUST00000215427,ENSMUST00000216334,ENSMUST00000217514,ENSMUST00000217636	2829.31	2779.31	9.44	9.39	7.24	9.61	7.72	7.9	22.56	38.85	27	19.57	24.25	17.3
ENSMUSG00000003134	ENSMUST00000054462,ENSMUST00000192099,ENSMUST00000192531,ENSMUST00000193823,ENSMUST00000195854	2256.19	2206.19	3.5	2.65	3.43	3.47	2.63	3.37	9.99	13.65	7.3	7.98	8.54	4.78
ENSMUSG00000003135	ENSMUST00000003219,ENSMUST00000160145,ENSMUST00000161515,ENSMUST00000195567	2315	2265	6.59	6.53	7.61	7.47	6.3	6.24	19.06	20.58	19.87	12.53	15.85	11.6
ENSMUSG00000003153	ENSMUST00000032476,ENSMUST00000165884,ENSMUST00000166135,ENSMUST00000168704,ENSMUST00000168801,ENSMUST00000169979,ENSMUST00000170724,ENSMUST00000171541	3612.29	3562.29	150.46	141.41	187.95	155.78	135.19	185.8	563.27	550.68	365.47	417.2	432.85	216.47
ENSMUSG00000003154	ENSMUST00000003238,ENSMUST00000177927,ENSMUST00000203075	4832.56	4782.56	0.17	0.13	0.19	0.23	0.1	0.24	1.16	0.89	0.81	0.71	0.82	0.52
ENSMUSG00000003161	ENSMUST00000003245,ENSMUST00000088786,ENSMUST00000144265,ENSMUST00000145119,ENSMUST00000148633,ENSMUST00000149420,ENSMUST00000197065	929.87	879.87	11.06	10.18	9.54	10.88	9.53	8.32	22.57	19.68	24	15.67	19.41	14.36
ENSMUSG00000003166	ENSMUST00000012152,ENSMUST00000066127,ENSMUST00000117082,ENSMUST00000117945,ENSMUST00000126919,ENSMUST00000135229,ENSMUST00000155611,ENSMUST00000155943,ENSMUST00000231306,ENSMUST00000231750	3734.46	3684.46	6.88	6.95	7.6	7.51	5.98	6.63	23.27	27.77	20.88	15.43	19.66	12.42
ENSMUSG00000003184	ENSMUST00000003284,ENSMUST00000107834,ENSMUST00000207128,ENSMUST00000207129,ENSMUST00000207476,ENSMUST00000207521,ENSMUST00000207555,ENSMUST00000208143,ENSMUST00000208767,ENSMUST00000208906,ENSMUST00000208958,ENSMUST00000209006,ENSMUST00000209066	1111.47	1061.47	7.56	7.55	7.89	9.57	8.2	7.47	22.99	30.92	34.45	15.76	19.99	21.32
ENSMUSG00000003190	ENSMUST00000003290,ENSMUST00000207213,ENSMUST00000207342,ENSMUST00000207443,ENSMUST00000207755,ENSMUST00000208128	1139.98	1089.98	2.49	2.1	3.1	2.89	2.17	2.61	6.92	10.9	8.64	6.15	6.98	5.2
ENSMUSG00000003198	ENSMUST00000054780,ENSMUST00000224294,ENSMUST00000224379	1477.05	1427.05	2.09	2.15	2.37	2.6	1.9	2.16	4.82	12.65	5.83	3.95	7.64	4.43
ENSMUSG00000003199	ENSMUST00000124302,ENSMUST00000133998,ENSMUST00000140926,ENSMUST00000149441,ENSMUST00000153197,ENSMUST00000159340,ENSMUST00000159420,ENSMUST00000159996,ENSMUST00000162883	1350.58	1300.58	14.07	14.21	15.99	16.43	13.75	13.34	48.27	55.86	51.99	35.62	44.66	31.76
ENSMUSG00000003200	ENSMUST00000003268	2072	2022	9.35	7.83	7.86	9.43	7.47	7.94	24.56	28.12	27.64	17.08	23.27	16.68
ENSMUSG00000003206	ENSMUST00000003274	1170	1120	0.5	0.35	0.3	0.34	0.31	0.3	1.24	1.26	0.59	0.7	0.89	0.54
ENSMUSG00000003208	ENSMUST00000086869	1311	1261	2.15	1.9	2.04	2.52	2.03	2.03	7.29	10.8	7.08	6.2	6.94	5.07
ENSMUSG00000003226	ENSMUST00000003310,ENSMUST00000219332,ENSMUST00000220131	9247.58	9197.58	16.09	14.57	15.14	16.49	15.41	15.11	54.87	104.1	60.12	42.1	53.02	36.6
ENSMUSG00000003227	ENSMUST00000003312	3637	3587	0.02	0.01	0.01	0	0.01	0.02	0	0.02	0.01	0.01	0.02	0
ENSMUSG00000003228	ENSMUST00000003313	3165	3115	0.42	0.39	0.46	0.51	0.44	0.49	1.34	1.45	1.15	0.95	1.14	0.74
ENSMUSG00000003233	ENSMUST00000003318,ENSMUST00000169552,ENSMUST00000171572,ENSMUST00000171774	2803.74	2753.74	0.72	0.6	0.81	0.71	0.65	0.67	4.24	5.89	4.18	2.79	3.56	2.13
ENSMUSG00000003234	ENSMUST00000003319,ENSMUST00000135861,ENSMUST00000148679,ENSMUST00000152339,ENSMUST00000154660,ENSMUST00000231258,ENSMUST00000231590,ENSMUST00000232127,ENSMUST00000232490,ENSMUST00000232680	1119.88	1069.88	15.94	14.32	13.6	16.9	14.08	13	40.44	43.74	52.98	25.42	41.97	30.84
ENSMUSG00000003235	ENSMUST00000003320,ENSMUST00000148714,ENSMUST00000231315	2403.05	2353.05	38.42	35.63	36.9	40.46	32.02	36.3	76.77	72.22	102.21	58.62	75.58	58.26
ENSMUSG00000003269	ENSMUST00000056820,ENSMUST00000107729,ENSMUST00000209245,ENSMUST00000210137,ENSMUST00000210853,ENSMUST00000210898,ENSMUST00000211263,ENSMUST00000211783,ENSMUST00000223361	1124.4	1074.4	21.28	19.39	19.72	22.66	19.5	19.7	48.16	50.48	56.74	34.24	46.81	33.44
ENSMUSG00000003271	ENSMUST00000075571,ENSMUST00000209435,ENSMUST00000209464,ENSMUST00000209739,ENSMUST00000210021,ENSMUST00000210147,ENSMUST00000210754,ENSMUST00000211779	1284.14	1234.14	1.6	1.28	1.66	1.32	1.36	1.97	2.37	2.57	1.99	2.27	2.04	0.93
ENSMUSG00000003273	ENSMUST00000003360,ENSMUST00000209796,ENSMUST00000210027,ENSMUST00000210872,ENSMUST00000211259	885.13	835.13	0.29	0.57	0.61	0.45	0.62	0.5	3.86	2.07	1.23	1.81	1.14	1.13
ENSMUSG00000003279	ENSMUST00000060072,ENSMUST00000097288,ENSMUST00000125691,ENSMUST00000126801,ENSMUST00000130971,ENSMUST00000133717,ENSMUST00000133983,ENSMUST00000135938,ENSMUST00000140728,ENSMUST00000146730,ENSMUST00000148486,ENSMUST00000150260,ENSMUST00000150798,ENSMUST00000155016,ENSMUST00000155823,ENSMUST00000156946	3377.28	3327.28	0.36	0.3	0.43	0.37	0.26	0.38	0.49	0.73	0.41	0.29	0.54	0.38
ENSMUSG00000003282	ENSMUST00000003369,ENSMUST00000137439,ENSMUST00000147035,ENSMUST00000151543	3174.66	3124.66	2.6	1.72	2.02	2.24	1.72	1.61	5.79	9.85	5.41	4.7	4.92	2.78
ENSMUSG00000003283	ENSMUST00000003370,ENSMUST00000109799,ENSMUST00000189688,ENSMUST00000191431	1927.16	1877.16	11.34	9.92	10.09	12.14	9.72	10.62	31.15	32.87	26.29	22.95	26.68	15.61
ENSMUSG00000003299	ENSMUST00000003386,ENSMUST00000213977,ENSMUST00000214124,ENSMUST00000216175,ENSMUST00000216325,ENSMUST00000216466,ENSMUST00000216818,ENSMUST00000216824	1349.03	1299.03	11.87	9.86	11.88	11.47	9.44	12.6	27.81	28.95	32.07	17.41	27.46	19.06
ENSMUSG00000003308	ENSMUST00000049567,ENSMUST00000164812,ENSMUST00000193247,ENSMUST00000193982,ENSMUST00000194542,ENSMUST00000216436	2993.25	2943.25	3.41	3.63	4.42	4.53	4.11	4.41	10.84	13.28	14.73	8.61	9.38	9.89
ENSMUSG00000003309	ENSMUST00000003397,ENSMUST00000115433,ENSMUST00000213250,ENSMUST00000213483,ENSMUST00000213762	1577.8	1527.8	3.25	2.79	2.71	3.02	2.8	2.79	10.26	8.91	10.36	7.86	9.62	6
ENSMUSG00000003316	ENSMUST00000003404,ENSMUST00000164283,ENSMUST00000168741,ENSMUST00000169020	5089.49	5039.49	5.73	4.91	6.4	6.19	5.44	5.46	28.42	40.63	24.32	22.26	27.37	15.42
ENSMUSG00000003341	ENSMUST00000020383,ENSMUST00000219648,ENSMUST00000220326	3660.93	3610.93	0.25	0.1	0.15	0.15	0.12	0.16	0.48	0.52	0.41	0.34	0.45	0.22
ENSMUSG00000003344	ENSMUST00000003434,ENSMUST00000126980,ENSMUST00000131876,ENSMUST00000147162,ENSMUST00000151794	2035.7	1985.7	5.98	5.91	6.82	6.26	5.63	6.88	17.07	13.86	14.44	11.4	13.87	8.59
ENSMUSG00000003345	ENSMUST00000079773,ENSMUST00000085435,ENSMUST00000217902,ENSMUST00000218093,ENSMUST00000219814,ENSMUST00000220025,ENSMUST00000220163,ENSMUST00000220431	2144.02	2094.02	16.72	16.61	14.23	17.97	15.76	16.66	50.85	59.9	49.32	42.02	46.51	30.98
ENSMUSG00000003346	ENSMUST00000003436,ENSMUST00000187646,ENSMUST00000189605,ENSMUST00000191440	1342.06	1292.06	7.78	6.67	7.14	7.7	6.36	6.6	17	18.4	18.7	13.41	15.32	10.82
ENSMUSG00000003348	ENSMUST00000003438,ENSMUST00000218090,ENSMUST00000218439,ENSMUST00000220138	2118.19	2068.19	3.22	2.19	2.89	2.69	2.47	2.93	7.08	10.92	8.63	5.58	9.15	4.73
ENSMUSG00000003352	ENSMUST00000003442,ENSMUST00000109150,ENSMUST00000229223,ENSMUST00000229282,ENSMUST00000230064,ENSMUST00000230490,ENSMUST00000230769	2419.23	2369.23	2.67	2.16	2.66	2.78	2.13	3	7.53	9.97	7.38	5.12	6.41	4.52
ENSMUSG00000003354	ENSMUST00000003444,ENSMUST00000229471	1900	1850	0.13	0.14	0.14	0.13	0.04	0.08	0.13	0.34	0.19	0.14	0.27	0.07
ENSMUSG00000003355	ENSMUST00000003445,ENSMUST00000229562,ENSMUST00000230743	816.96	766.96	6.56	6.39	6.43	7.19	6.41	6.97	14.5	11.11	11.13	10.33	12.36	6.58
ENSMUSG00000003360	ENSMUST00000003450,ENSMUST00000159170,ENSMUST00000159423,ENSMUST00000160506,ENSMUST00000161030,ENSMUST00000162384,ENSMUST00000228973	2994.74	2944.74	12.57	10.58	11.49	13.34	11.23	11.97	36.92	40.32	44.33	30.08	32.74	28.4
ENSMUSG00000003363	ENSMUST00000117095,ENSMUST00000117611,ENSMUST00000127240,ENSMUST00000131106,ENSMUST00000142981,ENSMUST00000143903,ENSMUST00000150964,ENSMUST00000155287	2007.96	1957.96	5.73	4.82	5.52	6.45	4.39	5.77	18.67	16.13	14.19	12.37	11.88	8.44
ENSMUSG00000003378	ENSMUST00000003468,ENSMUST00000205328,ENSMUST00000205661,ENSMUST00000205993,ENSMUST00000206095,ENSMUST00000206132,ENSMUST00000206134	3015.6	2965.6	0.47	0.38	0.46	0.46	0.38	0.47	2.26	2.6	1.09	1.46	1.88	0.87
ENSMUSG00000003379	ENSMUST00000003469	1457	1407	0.08	0.01	0	0.02	0.02	0.01	0.07	0.06	0.06	0.02	0.04	0.01
ENSMUSG00000003380	ENSMUST00000076961,ENSMUST00000205771,ENSMUST00000205871,ENSMUST00000206222,ENSMUST00000206868,ENSMUST00000206941	810.34	760.34	24.46	24.28	25.83	25.77	19.9	24.75	69.46	51.91	57.72	49.09	57.23	29.66
ENSMUSG00000003382	ENSMUST00000117293,ENSMUST00000119109,ENSMUST00000136680,ENSMUST00000152010,ENSMUST00000170036	5048.52	4998.52	1.52	1.43	1.58	1.56	1.31	1.45	5.14	9.28	6.08	4.07	5.95	4.14
ENSMUSG00000003402	ENSMUST00000003493,ENSMUST00000115331,ENSMUST00000214565,ENSMUST00000215795,ENSMUST00000216344	1940.96	1890.96	18.92	17.39	17.64	20.4	16.56	18.55	57.74	48.29	60.98	38.97	49.48	41.56
ENSMUSG00000003410	ENSMUST00000003501,ENSMUST00000213700,ENSMUST00000215901	4568.37	4518.37	0.25	0.14	0.29	0.51	0.18	0.2	0.66	1.27	0.88	0.47	0.61	0.33
ENSMUSG00000003411	ENSMUST00000003502,ENSMUST00000106650,ENSMUST00000106651,ENSMUST00000157062	1253.6	1203.6	0.26	0.36	0.31	0.49	0.19	0.35	0.78	1.01	0.71	0.33	0.59	0.31
ENSMUSG00000003418	ENSMUST00000003509,ENSMUST00000150781	4914	4864	0.23	0.19	0.21	0.26	0.2	0.23	0.65	0.75	0.75	0.38	0.62	0.36
ENSMUSG00000003420	ENSMUST00000003512,ENSMUST00000209830,ENSMUST00000210642,ENSMUST00000211085,ENSMUST00000211535,ENSMUST00000211668	1554.17	1504.17	2.61	2.21	2.06	2.43	2.16	2.42	5.08	3.94	2.67	3.8	4.82	1.84
ENSMUSG00000003421	ENSMUST00000003513,ENSMUST00000107829,ENSMUST00000209243,ENSMUST00000209308,ENSMUST00000209901,ENSMUST00000210088,ENSMUST00000210520,ENSMUST00000210668,ENSMUST00000210998,ENSMUST00000211465	952.35	902.35	18.97	17.64	18.01	19.49	17.27	18.1	48.14	46.05	48.75	32.86	44.71	29.25
ENSMUSG00000003423	ENSMUST00000085375,ENSMUST00000107811,ENSMUST00000209400,ENSMUST00000209847,ENSMUST00000209954,ENSMUST00000210139,ENSMUST00000211336,ENSMUST00000211414,ENSMUST00000211709	938.48	888.48	12.93	12.73	12.93	13.35	11.7	11.79	31.6	28.93	33.59	20.96	27.08	23.19
ENSMUSG00000003429	ENSMUST00000003521,ENSMUST00000209838,ENSMUST00000211583,ENSMUST00000211725	658.88	608.88	374.79	359.03	337.7	385.35	338.36	348.57	870.2	856.91	1102.45	609	837.41	624.14
ENSMUSG00000003435	ENSMUST00000003527,ENSMUST00000207563,ENSMUST00000207879,ENSMUST00000208243,ENSMUST00000208367,ENSMUST00000208726,ENSMUST00000209105,ENSMUST00000209141	3038.53	2988.53	10.91	9.59	12.95	12.18	10.17	12.45	45.78	58.97	49.02	33.01	42.21	30.35
ENSMUSG00000003436	ENSMUST00000108315,ENSMUST00000138721,ENSMUST00000145512	1338.85	1288.85	0.66	0.55	0.36	0.47	0.38	0.53	1.26	1.91	0.83	0.8	1.1	0.63
ENSMUSG00000003437	ENSMUST00000003529,ENSMUST00000122857,ENSMUST00000132910,ENSMUST00000143201,ENSMUST00000145339,ENSMUST00000146604,ENSMUST00000146886,ENSMUST00000146913,ENSMUST00000152512,ENSMUST00000154823	1397.2	1347.2	16.21	13.92	11.77	14.55	13.01	15.03	56.56	84.76	69.59	40.36	53.17	43.09
ENSMUSG00000003438	ENSMUST00000081946,ENSMUST00000131849,ENSMUST00000134263,ENSMUST00000135220,ENSMUST00000136427,ENSMUST00000151990	1230.66	1180.66	13.35	11.39	16.18	13.99	10.64	16.17	38.33	38.22	43.7	25.95	37.22	25.23
ENSMUSG00000003444	ENSMUST00000003536	1281	1231	5.29	4.57	5.01	4.74	4.52	5.25	10.59	13.63	13.85	7.32	11.49	7.5
ENSMUSG00000003452	ENSMUST00000003544,ENSMUST00000086829,ENSMUST00000111513,ENSMUST00000130270,ENSMUST00000140759,ENSMUST00000172926,ENSMUST00000173408,ENSMUST00000174886,ENSMUST00000203502	3884.4	3834.4	2.27	1.41	1.24	1.42	1.47	1.45	6.28	11.64	8.09	5.69	6.65	4.56
ENSMUSG00000003458	ENSMUST00000003550,ENSMUST00000122986,ENSMUST00000135928,ENSMUST00000140643,ENSMUST00000142825,ENSMUST00000146137	2576.17	2526.17	2.92	2.7	3.51	2.9	2.56	3.37	13.06	19.1	15.28	8.54	11.15	8.76
ENSMUSG00000003464	ENSMUST00000075895,ENSMUST00000111252,ENSMUST00000127662,ENSMUST00000133081,ENSMUST00000133546,ENSMUST00000147799	1800.65	1750.65	12.32	11.58	13.39	12.04	11.68	12.33	36.12	44.43	37.72	24.98	34.19	20.97
ENSMUSG00000003469	ENSMUST00000003561,ENSMUST00000159180	2838	2788	0.28	0.21	0.29	0.48	0.25	0.46	1.01	1.45	1.01	0.6	0.79	0.7
ENSMUSG00000003476	ENSMUST00000003568,ENSMUST00000095898,ENSMUST00000114374,ENSMUST00000164012,ENSMUST00000166954,ENSMUST00000169777,ENSMUST00000204117,ENSMUST00000212633,ENSMUST00000213026	2237.45	2187.45	0.19	0.07	0.16	0.14	0.1	0.13	0.35	0.38	0.46	0.28	0.39	0.32
ENSMUSG00000003477	ENSMUST00000003569,ENSMUST00000152720	998	948	0	0.02	0.02	0.02	0	0.03	0	0.05	0	0	0	0.02
ENSMUSG00000003484	ENSMUST00000003574,ENSMUST00000125448,ENSMUST00000141975	603	553	0.06	0	0.04	0	0.03	0	0	0	0.02	0	0	0.03
ENSMUSG00000003500	ENSMUST00000078155,ENSMUST00000159124,ENSMUST00000160613,ENSMUST00000160749,ENSMUST00000160878,ENSMUST00000161654,ENSMUST00000162099,ENSMUST00000162215,ENSMUST00000162242,ENSMUST00000162739	1698.29	1648.29	4.7	3.65	4.53	5.35	2.97	3.95	9.91	11.33	12.12	8.08	9.01	6.75
ENSMUSG00000003505	ENSMUST00000003597,ENSMUST00000098783,ENSMUST00000182983,ENSMUST00000183222	950.28	900.28	0.09	0.04	0.11	0	0.03	0.04	0	0.03	0	0.03	0.04	0
ENSMUSG00000003518	ENSMUST00000003612,ENSMUST00000107172,ENSMUST00000107173,ENSMUST00000125794,ENSMUST00000143177,ENSMUST00000151678,ENSMUST00000176261	3571.57	3521.57	1.45	1.68	2.14	1.65	1.44	1.98	4.5	4.71	5.26	3.87	4.71	3.43
ENSMUSG00000003526	ENSMUST00000003620,ENSMUST00000123969,ENSMUST00000126087,ENSMUST00000132241,ENSMUST00000136776,ENSMUST00000139861,ENSMUST00000141635,ENSMUST00000232384,ENSMUST00000232502,ENSMUST00000232554	1898.23	1848.23	5.99	6.59	5.85	8.07	5.52	5.24	19.36	23.37	20.89	12.85	16.81	14.12
ENSMUSG00000003527	ENSMUST00000003621,ENSMUST00000231921,ENSMUST00000232111,ENSMUST00000232366,ENSMUST00000232423	2296.07	2246.07	3.7	3.62	3.9	4.53	3.77	4.37	14.22	19.6	14.63	9.24	13.08	10.32
ENSMUSG00000003528	ENSMUST00000003622,ENSMUST00000129270,ENSMUST00000131507,ENSMUST00000142022,ENSMUST00000147384,ENSMUST00000150925	1303.29	1253.29	31.93	28.04	26.06	34.8	28.12	26.35	85.11	76.14	60.83	59.73	72.88	42.7
ENSMUSG00000003531	ENSMUST00000066027,ENSMUST00000076757,ENSMUST00000143343,ENSMUST00000148372,ENSMUST00000148521,ENSMUST00000151266,ENSMUST00000153123,ENSMUST00000155387	975.48	925.48	6.6	5.3	5.4	6.75	6.2	4.67	17.78	12.24	13.33	11.87	15.65	9.71
ENSMUSG00000003534	ENSMUST00000003628,ENSMUST00000097333,ENSMUST00000117301,ENSMUST00000119825,ENSMUST00000134995,ENSMUST00000135078,ENSMUST00000145900,ENSMUST00000146472,ENSMUST00000148065,ENSMUST00000155628,ENSMUST00000155957,ENSMUST00000166980	3498.29	3448.29	1.55	1.32	1.9	1.74	1.27	1.57	8.76	7.96	7.71	5.83	6.71	4.32
ENSMUSG00000003541	ENSMUST00000003635	1131	1081	1.69	2.19	1.81	2.16	1.63	2.56	4.65	8.7	3.88	2.55	7.42	2.68
ENSMUSG00000003545	ENSMUST00000003640,ENSMUST00000207334,ENSMUST00000207716,ENSMUST00000208230,ENSMUST00000208326,ENSMUST00000208446,ENSMUST00000208505	1483.04	1433.04	0.09	0.05	0.07	0.05	0.01	0.06	0.13	1.15	0.12	0.06	0.52	0.06
ENSMUSG00000003546	ENSMUST00000003642	2322	2272	3.62	3.65	3.61	4.31	3.25	3.24	8.35	9.13	7.79	6.2	8.73	4.79
ENSMUSG00000003549	ENSMUST00000003645,ENSMUST00000160192,ENSMUST00000160369,ENSMUST00000160909,ENSMUST00000161378,ENSMUST00000162197,ENSMUST00000162992,ENSMUST00000176723,ENSMUST00000176818,ENSMUST00000177486	624.28	574.28	9.56	8.38	9.15	10.49	8.16	9.59	22.03	20.2	25.88	13.54	18.4	13.59
ENSMUSG00000003555	ENSMUST00000026012,ENSMUST00000131142,ENSMUST00000156577	1815	1765	0.01	0.01	0	0.06	0.05	0	0	0	0	0	0	0
ENSMUSG00000003559	ENSMUST00000003655	1751	1701	1.98	2.02	1.85	2.45	2.1	2.37	6.31	6.84	6.52	4.32	5.71	3.89
ENSMUSG00000003573	ENSMUST00000003669,ENSMUST00000087467,ENSMUST00000110124,ENSMUST00000135368,ENSMUST00000135692,ENSMUST00000140212,ENSMUST00000143528,ENSMUST00000155711	1408.5	1358.5	3.7	3.67	3	4.29	3.27	3.46	15.7	15.68	12.14	12.07	12.73	7.87
ENSMUSG00000003575	ENSMUST00000076615,ENSMUST00000125273,ENSMUST00000125613,ENSMUST00000142769,ENSMUST00000153632	1749.01	1699.01	0.54	0.43	0.57	0.48	0.24	0.5	1.42	4.01	2.64	1.27	1.64	0.86
ENSMUSG00000003581	ENSMUST00000003677,ENSMUST00000124670,ENSMUST00000127165,ENSMUST00000145705	1590.7	1540.7	2.27	2.23	2.55	2.75	1.87	1.69	6.07	6.64	7.88	4.08	4.83	3.98
ENSMUSG00000003585	ENSMUST00000003681,ENSMUST00000123901,ENSMUST00000132421,ENSMUST00000133631,ENSMUST00000136420,ENSMUST00000145173	1585.81	1535.81	2.41	2.44	2.62	2.45	2.34	2.51	6.35	7.58	5.07	5.39	5.45	4.11
ENSMUSG00000003604	ENSMUST00000003705,ENSMUST00000099588,ENSMUST00000127894	1517.57	1467.57	4.82	4.5	4.45	5.1	4.36	4.88	11.86	12.35	15.66	9.65	12.5	8.75
ENSMUSG00000003617	ENSMUST00000003714,ENSMUST00000091309,ENSMUST00000108325,ENSMUST00000108328,ENSMUST00000108329,ENSMUST00000125994,ENSMUST00000128615,ENSMUST00000129135,ENSMUST00000131454,ENSMUST00000131811,ENSMUST00000150264,ENSMUST00000172605,ENSMUST00000172860,ENSMUST00000173779,ENSMUST00000173848,ENSMUST00000174803	1915.9	1865.9	0.11	0.03	0.04	0.01	0.01	0.1	0.12	0.17	0.08	0.15	0.04	0.08
ENSMUSG00000003623	ENSMUST00000003720,ENSMUST00000146115,ENSMUST00000157024	2966.64	2916.64	5.5	5.03	4.69	5.46	5.09	4.45	14.49	16.56	13.39	11.04	13.16	7.71
ENSMUSG00000003644	ENSMUST00000003741,ENSMUST00000105894,ENSMUST00000129636,ENSMUST00000137486,ENSMUST00000157067,ENSMUST00000168974,ENSMUST00000173961,ENSMUST00000173989,ENSMUST00000174481	2767.51	2717.51	18.51	16.95	19.73	20.63	18.04	19.46	65.89	58.53	59.24	46.07	53.46	37.57
ENSMUSG00000003657	ENSMUST00000003754,ENSMUST00000212297	1431	1381	0.15	0.14	0.2	0.11	0.09	0.12	0.41	0.54	0.33	0.26	0.38	0.27
ENSMUSG00000003660	ENSMUST00000103220,ENSMUST00000131435,ENSMUST00000140868,ENSMUST00000142327,ENSMUST00000143481	5762.78	5712.78	27.58	23.68	29.23	28.26	25.46	29.26	76.85	98.7	84.62	58.08	71.48	53.6
ENSMUSG00000003662	ENSMUST00000003759,ENSMUST00000143575,ENSMUST00000172636,ENSMUST00000174030,ENSMUST00000174863	1079.65	1029.65	16.52	15.37	15.56	17.75	13.79	15.44	35.24	29.92	44.42	26.16	31.95	24.36
ENSMUSG00000003665	ENSMUST00000003762,ENSMUST00000232410	3541	3491	0.05	0.02	0	0	0.02	0.02	0.01	0.06	0.04	0.02	0.01	0
ENSMUSG00000003680	ENSMUST00000003777,ENSMUST00000010249,ENSMUST00000176080,ENSMUST00000176331,ENSMUST00000176496,ENSMUST00000176610,ENSMUST00000176688,ENSMUST00000176719,ENSMUST00000176747,ENSMUST00000176991,ENSMUST00000177056,ENSMUST00000177216,ENSMUST00000189739	1228.55	1178.55	11.29	10.33	11.22	12.81	10.29	11.14	25.67	30.47	26.69	17.94	22.46	16.84
ENSMUSG00000003721	ENSMUST00000003818,ENSMUST00000071064,ENSMUST00000159085,ENSMUST00000159125,ENSMUST00000159192,ENSMUST00000159528,ENSMUST00000160688,ENSMUST00000160968,ENSMUST00000161068,ENSMUST00000161818,ENSMUST00000162019,ENSMUST00000162582,ENSMUST00000162790,ENSMUST00000186915	1871.77	1821.77	3.69	3.37	4.39	4.7	3.76	3.98	10.33	11.37	9.44	5.59	10.24	5.76
ENSMUSG00000003731	ENSMUST00000003828,ENSMUST00000102590,ENSMUST00000126010,ENSMUST00000138916,ENSMUST00000146215,ENSMUST00000146361	4003.38	3953.38	6.29	6.33	7.04	7.46	6.17	8.74	19.75	24.69	23.08	12.65	16.77	13.09
ENSMUSG00000003746	ENSMUST00000003843,ENSMUST00000105469,ENSMUST00000105470,ENSMUST00000133330,ENSMUST00000146483,ENSMUST00000218317,ENSMUST00000219234,ENSMUST00000220088	3900.72	3850.72	0.77	0.61	0.54	0.79	0.55	0.72	2.59	5.82	2.15	2.04	2.98	1.19
ENSMUSG00000003752	ENSMUST00000003850,ENSMUST00000147170,ENSMUST00000149067,ENSMUST00000206441	3184.67	3134.67	2.04	1.94	2.14	2.57	1.79	2.1	5.49	6.53	6.35	3.72	5.47	4.75
ENSMUSG00000003762	ENSMUST00000003860,ENSMUST00000108378,ENSMUST00000123012,ENSMUST00000128090,ENSMUST00000142910,ENSMUST00000143372,ENSMUST00000206312	2126.69	2076.69	1.65	1.81	2.22	1.98	1.46	1.81	5.49	8.63	3.91	4.66	4.67	2.27
ENSMUSG00000003778	ENSMUST00000003876,ENSMUST00000097626,ENSMUST00000115765,ENSMUST00000115766,ENSMUST00000127159,ENSMUST00000145431,ENSMUST00000152612,ENSMUST00000153569	3578.53	3528.53	16.82	15.56	18.19	18.52	15.93	16.69	56.51	98.08	58.85	40.57	56.57	36.01
ENSMUSG00000003779	ENSMUST00000166044,ENSMUST00000167161	3565.93	3515.93	26.87	24.19	24.54	28.38	23.64	23.77	54.5	69.78	71.7	38.42	51.04	42.97
ENSMUSG00000003808	ENSMUST00000003906,ENSMUST00000109754,ENSMUST00000129595,ENSMUST00000141480,ENSMUST00000144404,ENSMUST00000156970	1782.34	1732.34	16.13	14.85	15.19	16.94	13.65	14.68	46.35	56.12	58.63	31.8	48.25	35.87
ENSMUSG00000003809	ENSMUST00000003907,ENSMUST00000109745,ENSMUST00000128023,ENSMUST00000136462,ENSMUST00000139180,ENSMUST00000142748	1650.75	1600.75	12.87	12.12	12.31	13.46	11.55	11.15	32.78	33.88	39.9	26.58	32.72	22.29
ENSMUSG00000003810	ENSMUST00000003908,ENSMUST00000106484,ENSMUST00000106485,ENSMUST00000106486,ENSMUST00000123072,ENSMUST00000123761,ENSMUST00000128252,ENSMUST00000128713,ENSMUST00000131809,ENSMUST00000134460,ENSMUST00000144281,ENSMUST00000147262,ENSMUST00000147459,ENSMUST00000151347,ENSMUST00000156884	2886.52	2836.52	3.48	3.5	3	3.97	4.35	2.94	16.98	21.6	13.58	14.07	14.04	9.04
ENSMUSG00000003812	ENSMUST00000003910,ENSMUST00000109744,ENSMUST00000128400,ENSMUST00000134569,ENSMUST00000135219,ENSMUST00000145292,ENSMUST00000148573,ENSMUST00000153215,ENSMUST00000155942	1489.78	1439.78	8.35	7.1	8.02	8.17	7.22	7.68	23.15	21.42	19.49	18.71	17.25	13.25
ENSMUSG00000003813	ENSMUST00000003911,ENSMUST00000109761,ENSMUST00000125711,ENSMUST00000128035,ENSMUST00000134395,ENSMUST00000144675,ENSMUST00000144994	1613.09	1563.09	8.26	8.91	10.78	12.06	8.47	10.4	31.94	35.31	33.66	20.86	26.95	22.27
ENSMUSG00000003814	ENSMUST00000003912,ENSMUST00000125998,ENSMUST00000128028,ENSMUST00000154774	1889.6	1839.6	86.11	73.53	89.36	94.02	71.39	88.5	301.29	260.38	306.79	195.9	254.43	197.27
ENSMUSG00000003824	ENSMUST00000003922,ENSMUST00000136026,ENSMUST00000144466,ENSMUST00000170296	841.62	791.62	18.63	15.89	17.11	19.17	15.7	17.1	45.5	49.87	35.41	30.42	40.01	20.39
ENSMUSG00000003847	ENSMUST00000075922,ENSMUST00000077440,ENSMUST00000125721,ENSMUST00000126333,ENSMUST00000126397,ENSMUST00000133026,ENSMUST00000144100,ENSMUST00000147588,ENSMUST00000148006,ENSMUST00000149972,ENSMUST00000151114,ENSMUST00000151582,ENSMUST00000154474,ENSMUST00000169453	5764.23	5714.23	1.85	1.92	2.61	2.68	2.06	2.35	11.26	25.84	7.15	9.45	11.79	5.6
ENSMUSG00000003848	ENSMUST00000003946,ENSMUST00000076585,ENSMUST00000109273,ENSMUST00000163757,ENSMUST00000163973,ENSMUST00000165266,ENSMUST00000169311,ENSMUST00000170796	1473.69	1423.69	10.54	6.96	7.84	8.76	8.53	9.39	22.79	18.21	22.71	11.74	19.69	16.42
ENSMUSG00000003849	ENSMUST00000003947	1553	1503	24.49	21.72	20.57	24.94	20.02	21.38	45.52	33.79	44.48	31.72	37.64	26.55
ENSMUSG00000003863	ENSMUST00000003961,ENSMUST00000209424,ENSMUST00000210248,ENSMUST00000210479,ENSMUST00000210586,ENSMUST00000210844,ENSMUST00000211067,ENSMUST00000211098	2458.98	2408.98	2.62	2.17	2.26	2.66	1.92	2.51	4.61	3.64	3.31	2.83	3.09	1.93
ENSMUSG00000003865	ENSMUST00000003964,ENSMUST00000209230,ENSMUST00000209640,ENSMUST00000210563,ENSMUST00000210715,ENSMUST00000211150	3387.76	3337.76	2.37	2.39	2.95	3.04	2.39	3.29	7.6	6.19	5.27	4.84	4.78	3.6
ENSMUSG00000003868	ENSMUST00000107771,ENSMUST00000209426,ENSMUST00000210271,ENSMUST00000210439,ENSMUST00000211214,ENSMUST00000211440,ENSMUST00000211478,ENSMUST00000211666	1162.49	1112.49	55.66	44.44	50.12	50.69	44.11	46.84	122.55	132.57	144.79	83	106.63	79.91
ENSMUSG00000003872	ENSMUST00000003971,ENSMUST00000209226,ENSMUST00000209756,ENSMUST00000210216,ENSMUST00000210865,ENSMUST00000211416	532.03	482.03	2.12	1.38	1.66	2.11	2.03	2.15	4.75	7.66	2.59	2.76	4.04	1.67
ENSMUSG00000003873	ENSMUST00000033093,ENSMUST00000210019,ENSMUST00000210392,ENSMUST00000211195,ENSMUST00000211365,ENSMUST00000211615	820.34	770.34	61.3	60.04	65.72	64.91	60.23	69.97	154.83	145.65	201.98	107.45	141.56	123.27
ENSMUSG00000003882	ENSMUST00000003981,ENSMUST00000227234,ENSMUST00000228673,ENSMUST00000228782	3516	3466	0.02	0.01	0	0	0.01	0.08	0.08	0.03	0	0.01	0	0.01
ENSMUSG00000003923	ENSMUST00000092430,ENSMUST00000105432,ENSMUST00000121685,ENSMUST00000145220,ENSMUST00000152505	1315.15	1265.15	26.4	24.52	23.78	25.83	24.12	29.34	64.86	93.08	100.94	48.94	65.59	61.71
ENSMUSG00000003929	ENSMUST00000054072	6639	6589	1.02	0.87	1.12	1.06	0.91	0.9	3.68	6.92	2.7	2.61	3.33	1.65
ENSMUSG00000003934	ENSMUST00000004036	3183	3133	0.35	0.22	0.46	0.36	0.24	0.36	1.63	2.92	0.98	0.9	1.33	0.53
ENSMUSG00000003948	ENSMUST00000004050,ENSMUST00000107887	2583.65	2533.65	0.93	0.64	0.77	0.89	0.65	0.85	3.36	2.98	2.61	2.6	2.95	1.35
ENSMUSG00000003949	ENSMUST00000004051,ENSMUST00000043658,ENSMUST00000107881,ENSMUST00000137957,ENSMUST00000145786,ENSMUST00000176001	1172.07	1122.07	0.3	0.03	0.11	0.18	0.06	0.13	0.94	0.97	0.48	0.52	0.18	0.4
ENSMUSG00000003955	ENSMUST00000004057,ENSMUST00000231351,ENSMUST00000231379,ENSMUST00000232390	581.53	531.53	19	14.76	14.94	18.02	16.27	15.39	47.75	51.05	42.4	37.35	43.17	22.41
ENSMUSG00000003970	ENSMUST00000004072,ENSMUST00000229183,ENSMUST00000229591	852.11	802.11	739.43	679.96	660.46	749.48	629.2	668.7	1631.43	1381.73	1847.98	1174.29	1481.57	1105.24
ENSMUSG00000003974	ENSMUST00000004076	3049	2999	0.04	0.01	0	0	0.03	0.02	0	0.03	0	0	0	0.01
ENSMUSG00000003992	ENSMUST00000004094,ENSMUST00000042122,ENSMUST00000133984,ENSMUST00000137493,ENSMUST00000137658,ENSMUST00000138488,ENSMUST00000141381,ENSMUST00000144659,ENSMUST00000156547,ENSMUST00000231481	1467.13	1417.13	0.76	0.68	0.73	0.85	0.67	0.94	2.04	2.06	1.13	1.34	1.47	0.61
ENSMUSG00000004018	ENSMUST00000004120,ENSMUST00000109509,ENSMUST00000134445,ENSMUST00000136830,ENSMUST00000143471	1229.72	1179.72	11.35	10.02	10.61	10.39	11.2	9.51	25.24	26.75	27.33	17.38	25.68	18.85
ENSMUSG00000004031	ENSMUST00000004133,ENSMUST00000192709,ENSMUST00000194578,ENSMUST00000195271	4353.9	4303.9	0.07	0.06	0.06	0.04	0.08	0.05	0.25	0.26	0.18	0.23	0.24	0.11
ENSMUSG00000004032	ENSMUST00000004134,ENSMUST00000167387,ENSMUST00000167523,ENSMUST00000169365,ENSMUST00000170058,ENSMUST00000172247	901.2	851.2	0.72	0.66	0.81	0.58	0.48	0.99	6.07	6.04	6.85	4.68	5.4	2.58
ENSMUSG00000004035	ENSMUST00000004137,ENSMUST00000106687,ENSMUST00000106688,ENSMUST00000124215,ENSMUST00000133947	1255.89	1205.89	0.74	0.64	0.79	0.95	0.89	0.88	2.58	3.65	2.61	1.97	2.31	1.42
ENSMUSG00000004038	ENSMUST00000004136	1311	1261	0.19	0.05	0.44	0.15	0.19	0.2	3.11	1.69	1.56	0.96	1.99	1.17
ENSMUSG00000004040	ENSMUST00000092671,ENSMUST00000103114,ENSMUST00000127638,ENSMUST00000130686,ENSMUST00000137093,ENSMUST00000137367,ENSMUST00000138438,ENSMUST00000146971,ENSMUST00000151544,ENSMUST00000152601,ENSMUST00000152623,ENSMUST00000154170,ENSMUST00000155972,ENSMUST00000156645	3390.52	3340.52	6.58	7.06	9.44	7.25	7.76	8.7	22.13	75.79	37.33	15.6	54.59	26.08
ENSMUSG00000004043	ENSMUST00000004145,ENSMUST00000107356,ENSMUST00000107357,ENSMUST00000133036,ENSMUST00000135272,ENSMUST00000138083,ENSMUST00000154087	3712.86	3662.86	0.78	0.57	1	0.85	0.74	0.92	2.2	2.47	2.23	1.62	1.86	1.63
ENSMUSG00000004044	ENSMUST00000060792,ENSMUST00000132934	3491	3441	1.37	1.4	1.84	1.48	1.27	1.79	4.23	4.44	6.26	3.65	3.78	4.34
ENSMUSG00000004054	ENSMUST00000004156	3801	3751	1.49	1.15	1.59	1.51	1.2	1.54	3.75	4.81	4.4	2.62	3.31	2.67
ENSMUSG00000004056	ENSMUST00000051356,ENSMUST00000085917,ENSMUST00000108342,ENSMUST00000108343,ENSMUST00000108344,ENSMUST00000128540,ENSMUST00000136962,ENSMUST00000136981,ENSMUST00000138459,ENSMUST00000142365,ENSMUST00000143347,ENSMUST00000143499,ENSMUST00000147263,ENSMUST00000167435	2674.27	2624.27	4.95	4.66	5.55	5.6	5.36	5.4	22.69	34.91	26.47	15.31	26.66	15.14
ENSMUSG00000004069	ENSMUST00000060067,ENSMUST00000115854,ENSMUST00000138495,ENSMUST00000144815,ENSMUST00000229529	2525.08	2475.08	12.95	12.85	11.54	14.66	11.98	12.25	33.8	33.13	41.32	23.83	31.23	24.9
ENSMUSG00000004070	ENSMUST00000004172,ENSMUST00000118885,ENSMUST00000120232,ENSMUST00000121529,ENSMUST00000140367,ENSMUST00000154117	1320.77	1270.77	6.15	6.09	6.01	7.68	6.22	5.9	16.16	13.14	16.08	10.29	13.68	10.66
ENSMUSG00000004071	ENSMUST00000004173,ENSMUST00000117713,ENSMUST00000118703,ENSMUST00000140187,ENSMUST00000147225,ENSMUST00000152667,ENSMUST00000229452	2727.52	2677.52	5.03	4.87	6.33	6.5	4.69	5.38	16.58	18.52	16.33	11.84	13.94	9.03
ENSMUSG00000004085	ENSMUST00000090824,ENSMUST00000112073,ENSMUST00000135204,ENSMUST00000135469,ENSMUST00000144111,ENSMUST00000150126	3944.85	3894.85	1.92	1.67	1.93	2.19	1.73	1.55	9.3	14.75	8.96	7.19	8.74	6.16
ENSMUSG00000004096	ENSMUST00000004200,ENSMUST00000213913,ENSMUST00000215143,ENSMUST00000216619	893.96	843.96	29.4	23.73	24.57	28.28	24.37	23.7	65.68	81.87	86.63	44.6	62.48	55.73
ENSMUSG00000004098	ENSMUST00000004201,ENSMUST00000145974	5823.53	5773.53	0.32	0.33	0.48	0.41	0.3	0.43	1.56	2.15	2.11	0.92	1.19	1.33
ENSMUSG00000004099	ENSMUST00000004202,ENSMUST00000177754,ENSMUST00000178110,ENSMUST00000214964,ENSMUST00000215545,ENSMUST00000216135,ENSMUST00000216540	5075.4	5025.4	24.8	22.46	24.45	28.7	22.35	23.39	92.45	115.19	87.32	63.75	80.33	61.18
ENSMUSG00000004100	ENSMUST00000004203,ENSMUST00000135608,ENSMUST00000145231,ENSMUST00000147780,ENSMUST00000153227,ENSMUST00000157047,ENSMUST00000214331	1768	1718	23.58	20.36	20.21	25.29	18.52	19.75	81.44	104.54	100.93	54.47	85.39	64.45
ENSMUSG00000004105	ENSMUST00000004208,ENSMUST00000139148,ENSMUST00000143252,ENSMUST00000193373	2816.67	2766.67	0.16	0.16	0.17	0.19	0.15	0.24	0.98	1.03	1.2	0.73	0.74	0.62
ENSMUSG00000004110	ENSMUST00000004214,ENSMUST00000186256,ENSMUST00000187541,ENSMUST00000188321,ENSMUST00000188384,ENSMUST00000188965,ENSMUST00000211821,ENSMUST00000226546	3265.25	3215.25	0.17	0.06	0.1	0.09	0.06	0.1	0.44	0.84	0.53	0.16	0.38	0.53
ENSMUSG00000004113	ENSMUST00000041342,ENSMUST00000070864,ENSMUST00000100348,ENSMUST00000102939,ENSMUST00000114447,ENSMUST00000124183,ENSMUST00000125798,ENSMUST00000131861,ENSMUST00000133892,ENSMUST00000155356	8744.86	8694.86	0.21	0.2	0.28	0.33	0.26	0.23	2.69	3.92	1.47	1.66	2.1	0.9
ENSMUSG00000004127	ENSMUST00000040321,ENSMUST00000159481,ENSMUST00000159622,ENSMUST00000161141,ENSMUST00000161791,ENSMUST00000162864	1865.61	1815.61	4.42	3.82	4.23	4.29	3.81	3.66	10.7	14.89	16.93	6.69	11.99	11.59
ENSMUSG00000004151	ENSMUST00000095767,ENSMUST00000159334,ENSMUST00000160244,ENSMUST00000160701,ENSMUST00000160856,ENSMUST00000160996,ENSMUST00000161164,ENSMUST00000161513,ENSMUST00000161591,ENSMUST00000161980,ENSMUST00000162563,ENSMUST00000162730,ENSMUST00000220492	2501.24	2451.24	2.77	3.05	3.89	3.47	2.92	3.81	7.17	11.97	8.15	4.84	6.23	4.88
ENSMUSG00000004187	ENSMUST00000004294,ENSMUST00000229112,ENSMUST00000229513,ENSMUST00000230124,ENSMUST00000230451,ENSMUST00000230964	2675.63	2625.63	0.78	0.54	0.69	0.87	0.59	0.79	3.98	4.33	2.76	2.2	2.48	1.63
ENSMUSG00000004207	ENSMUST00000004316,ENSMUST00000105465,ENSMUST00000165878,ENSMUST00000177779,ENSMUST00000179238	2585.94	2535.94	36.01	32.23	36.46	38.62	32.43	36.2	116.11	115.12	104.6	85.01	97.04	65.47
ENSMUSG00000004221	ENSMUST00000004330,ENSMUST00000064407,ENSMUST00000114127,ENSMUST00000114128,ENSMUST00000114129,ENSMUST00000114130,ENSMUST00000114133,ENSMUST00000130802,ENSMUST00000132749,ENSMUST00000135165,ENSMUST00000138564,ENSMUST00000139036,ENSMUST00000143784,ENSMUST00000144947,ENSMUST00000149525,ENSMUST00000156707,ENSMUST00000164101,ENSMUST00000180230	2806	2756	4.51	5.41	5.04	5.4	4.38	4.25	12.45	17.54	14.38	11.69	13.17	9.6
ENSMUSG00000004231	ENSMUST00000004340,ENSMUST00000173346,ENSMUST00000174490	4110	4060	0.03	0.02	0.01	0.01	0.01	0.04	0.01	0.04	0.01	0.01	0.02	0.02
ENSMUSG00000004233	ENSMUST00000004343,ENSMUST00000126875,ENSMUST00000135960,ENSMUST00000145650,ENSMUST00000198044	3558.48	3508.48	0.68	1.07	0.75	0.91	0.83	1.05	2.04	3.13	2.56	1.92	2.78	2.14
[truncated: 53,426 more rows]

## Sheet: TPMs_ISGs_MEFs
gene_id	transcript_id.s.	length	effective_length	MEF_IFNb_0h_Rep1	MEF_IFNb_0h_Rep2	MEF_IFNb_1h_Rep1	MEF_IFNb_1h_Rep2	MEF_IFNb_6h_Rep1	MEF_IFNb_6h_Rep2
[truncated: 54,109 more rows]

[truncated: 1 more sheets: TPMs_ISGs_NPCs]
