# Supplementary material for: Epigenetic signals that direct cell type–specific interferon beta response in mouse cells
Source: Life Sci Alliance. 2023 Feb 2;6(4):e202201823. doi: 10.26508/lsa.202201823 (PMC9900254; doi:10.26508/lsa.202201823)
Supplement: Supplementary file 6 [file LSA-2022-01823_SdataFS2.xlsx]

## Sheet: Source Data content
	Source Data
	Epigenetic signals that direct cell type specific interferon beta response in mouse cells
	Markus Muckenhuber, Isabelle Seufert, Katharina Müller-Ott, Jan-Philipp Mallm, Lara C. Klett, Caroline Knotz, Jana Hechler, Nick Kepper, Fabian Erdel, Karsten Rippe
	This Source Data file contains the data for the indicated main and supplementary figures. Other main and supplementary figures that have source data not suited for inclusion in this Excel file can be recreated with the data publicly available at accession number GSE160764 of Gene Expression Omnibus ((https://www.ncbi.nlm.nih.gov/geo/) and the R-scripts and description that are provided at the Git…

## Sheet: Fig. S2
	Figure S2
	A	Supplementary Table S3	Worksheets: TPMs_ISGs_ESCs, TPMs_ISGs_MEFs, TPMs_ISGs_NPCs
	B - C	GSE160764	https://www.ncbi.nlm.nih.gov/geo/query/acc.cgi?acc=GSE160764
	D	GSE160764	https://www.ncbi.nlm.nih.gov/geo/query/acc.cgi?acc=GSE160764
