# Supplementary material for: Epigenetic signals that direct cell type–specific interferon beta response in mouse cells
Source: Life Sci Alliance. 2023 Feb 2;6(4):e202201823. doi: 10.26508/lsa.202201823 (PMC9900254; doi:10.26508/lsa.202201823)
Supplement: Supplementary file 11 [file LSA-2022-01823_TableS5.xlsx]

## Sheet: Table S5 content
	Supplementary Table S5. Assignment of regulatory mechanism to ISGs.
	Promoter binding of STAT1 and/or STAT2 as well as assignment of STAT1/2 bound enhancers predicted from the co-regulation analysis. The data refer to Fig. 4, S3, S4 and Table S6
	Worksheet description
	Summary_STAT1-2_peaks	Contains the chromatin coordinates (A to C) for all identified STAT1/2 peaks. The next three columns (D to F) contain the coordinated of the 2kb expaned STAT1/2 peak reagions. Element_ID contains a unique identifier. The following column ESC 0 h IFNb / cluster_ESC_0h contain the information about the chromatine state of these binding sites in ESCs at baseline (0h). The column MEF 0 h IFNb / clust…
	ISG_TSS_w_STAT_ESC	Contains the genomic coordinates of ISGs promoters (chr, start, end) followed by the ENSEMBL gene ID and the gene symbole in ESCs. The next four columns contain TRUE/FALSE categories if the ISG is bound by STAT1 only, STAT1/2, STAT2 only or not bound. Followed by three identical sets either STAT1, STAT1/2 or STAT2 peaks, whcih containing the genomic coordinates of the STAT peak (chr, start, end).…
	ISG_TSS_w_STAT_MEF	Contains the genomic coordinates of ISGs promoters (chr, start, end) followed by the ENSEMBL gene ID and the gene symbole in MEFs. The next four columns contain TRUE/FALSE categories if the ISG is bound by STAT1 only, STAT1/2, STAT2 only or not bound. Followed by three identical sets either STAT1, STAT1/2 or STAT2 peaks, whcih containing the genomic coordinates of the STAT peak (chr, start, end).…
	ChomStat_S1-2_peaks_ESC	Contains information about the chromatin stated of the STAT1/2 peaks in ESCs. First three columns contain the genomic coordinates (chr, start, end) of the STAT1/2 peak, the genomic coordinates of the 2kb STAT1/2 peak region, the cluster_id and cluster_name of the chromatin state. Followed by the unique element_ID, cell type and the treatment time point. The remaining columns contain the normalize…
	ChomStat_S1-2_peaks_MEF	Contains information about the chromatin stated of the STAT1/2 peaks in MEFs. First three columns contain the genomic coordinates (chr, start, end) of the STAT1/2 peak, the genomic coordinates of the 2kb STAT1/2 peak region, the cluster_id and cluster_name of the chromatin state. Followed by the unique element_ID, cell type and the treatment time point. The remaining columns contain the normalize…

## Sheet: Summary_STAT1-2_peaks
STAT1/2 peak			STAT1/2 peak region (2k)				ESC 0 h IFNb	MEF 0 h IFNb	Binding in ESC			Binding in MEF
chr	start	end	chr	start	end	element_ID	cluster_ESC_0h	cluster_MEF_0h	bound_ESC	bound_ESC_1h	bound_ESC_6h	bound_MEF	bound_MEF_1h	bound_MEF_6h
chrX	14091756	14092161	chrX	14090958	14092959	element_390	Repressed	Bivalent	unbound	FALSE	FALSE	bound_1h_6h	TRUE	TRUE
chr9	107975339	107975703	chr9	107974521	107976522	element_370	Poised	Active Enhancer	unbound	FALSE	FALSE	bound_1h_6h	TRUE	TRUE
chr9	109054694	109055076	chr9	109053885	109055886	element_372	Poised	Active Enhancer	bound_1h	TRUE	FALSE	bound_1h_6h	TRUE	TRUE
chr9	120001904	120002236	chr9	120001070	120003071	element_373	Active Enhancer	Active Enhancer	unbound	FALSE	FALSE	bound_1h	TRUE	FALSE
chr9	122310735	122311174	chr9	122309954	122311955	element_374	Poised	Bivalent	bound_1h	TRUE	FALSE	bound_1h_6h	TRUE	TRUE
chr9	20868571	20868992	chr9	20867781	20869782	element_377	Active Enhancer	Active Enhancer	bound_1h	TRUE	FALSE	bound_1h_6h	TRUE	TRUE
chr9	21235347	21235628	chr9	21234487	21236488	element_378	Poised	Poised	unbound	FALSE	FALSE	bound_6h	FALSE	TRUE
chr9	37656374	37656655	chr9	37655514	37657515	element_380	Active Promoter	Active Promoter	unbound	FALSE	FALSE	bound_6h	FALSE	TRUE
chr9	44881316	44881616	chr9	44880466	44882467	element_381	Active Promoter	Active Promoter	unbound	FALSE	FALSE	bound_1h	TRUE	FALSE
chr9	58249483	58249893	chr9	58248688	58250689	element_383	Active Promoter	Active Enhancer	bound_1h	TRUE	FALSE	bound_1h_6h	TRUE	TRUE
chr9	7862967	7863330	chr9	7862148	7864149	element_385	Poised	Repressed	bound_1h_6h	TRUE	TRUE	bound_6h	FALSE	TRUE
chr8	22808381	22808822	chr8	22807601	22809602	element_358	Active Enhancer	Active Enhancer	bound_1h	TRUE	FALSE	bound_1h_6h	TRUE	TRUE
chr8	45409797	45410360	chr8	45409078	45411079	element_359	Poised	Bivalent	unbound	FALSE	FALSE	bound_1h_6h	TRUE	TRUE
chr8	46739399	46739745	chr8	46738572	46740573	element_360	Poised	Active Promoter	unbound	FALSE	FALSE	bound_1h	TRUE	FALSE
chr8	61909202	61909596	chr8	61908399	61910400	element_361	Repressed	Poised	unbound	FALSE	FALSE	bound_6h	FALSE	TRUE
chr8	61927748	61928470	chr8	61927109	61929110	element_362	Bivalent	Bivalent	bound_1h_6h	TRUE	TRUE	bound_1h_6h	TRUE	TRUE
chr8	71537257	71538085	chr8	71536671	71538672	element_364	Active Enhancer	Active Enhancer	bound_1h_6h	TRUE	TRUE	bound_1h_6h	TRUE	TRUE
chr8	83332602	83332910	chr8	83331756	83333757	element_367	Active Promoter	Active Enhancer	unbound	FALSE	FALSE	bound_1h_6h	TRUE	TRUE
chr7	104244233	104244757	chr7	104243495	104245496	element_337	Active Promoter	Active Promoter	bound_1h_6h	TRUE	TRUE	bound_1h_6h	TRUE	TRUE
chr7	104353012	104353556	chr7	104352284	104354285	element_338	Active Promoter	Active Promoter	bound_1h_6h	TRUE	TRUE	bound_1h_6h	TRUE	TRUE
chr7	104445876	104446270	chr7	104445073	104447074	element_339	Poised	Repressed	bound_6h	FALSE	TRUE	bound_1h_6h	TRUE	TRUE
chr7	104464960	104465400	chr7	104464180	104466181	element_340	Poised	Repressed	bound_1h_6h	TRUE	TRUE	bound_6h	FALSE	TRUE
chr7	106236660	106237091	chr7	106235875	106237876	element_341	Repressed	Active Enhancer	unbound	FALSE	FALSE	bound_1h_6h	TRUE	TRUE
chr7	109567465	109567702	chr7	109566583	109568584	element_342	Poised	Poised	unbound	FALSE	FALSE	bound_6h	FALSE	TRUE
chr7	114744794	114745035	chr7	114743914	114745915	element_344	Poised	Active Enhancer	unbound	FALSE	FALSE	bound_6h	FALSE	TRUE
chr7	134028571	134028844	chr7	134027707	134029708	element_345	Repressed	Bivalent	unbound	FALSE	FALSE	bound_1h	TRUE	FALSE
chr7	139440051	139440289	chr7	139439170	139441171	element_346	Poised	Bivalent	unbound	FALSE	FALSE	bound_6h	FALSE	TRUE
chr7	141010511	141010910	chr7	141009710	141011711	element_347	Bivalent	Active Promoter	bound_1h_6h	TRUE	TRUE	bound_1h_6h	TRUE	TRUE
chr7	141265808	141266393	chr7	141265100	141267101	element_348	Poised	Active Enhancer	bound_1h_6h	TRUE	TRUE	bound_1h_6h	TRUE	TRUE
chr7	141435285	141435689	chr7	141434487	141436488	element_349	Poised	Active Enhancer	unbound	FALSE	FALSE	bound_1h_6h	TRUE	TRUE
chr7	141476618	141476867	chr7	141475742	141477743	element_350	Active Enhancer	Active Promoter	unbound	FALSE	FALSE	bound_1h	TRUE	FALSE
chr7	28381221	28381675	chr7	28380448	28382449	element_351	Active Promoter	Active Enhancer	bound_1h	TRUE	FALSE	bound_1h_6h	TRUE	TRUE
chr7	47008653	47008954	chr7	47007803	47009804	element_353	Active Promoter	Active Promoter	unbound	FALSE	FALSE	bound_6h	FALSE	TRUE
chr7	73618193	73618623	chr7	73617408	73619409	element_354	Active Promoter	Active Promoter	unbound	FALSE	FALSE	bound_1h	TRUE	FALSE
chr7	74695278	74695713	chr7	74694495	74696496	element_355	Repressed	Repressed	unbound	FALSE	FALSE	bound_6h	FALSE	TRUE
chr6	108246352	108246708	chr6	108245530	108247531	element_310	Poised	Poised	unbound	FALSE	FALSE	bound_6h	FALSE	TRUE
chr6	111734021	111734459	chr6	111733240	111735241	element_311	Repressed	Repressed	bound_1h_6h	TRUE	TRUE	bound_1h_6h	TRUE	TRUE
chr6	120016730	120017064	chr6	120015897	120017898	element_312	Repressed	Bivalent	unbound	FALSE	FALSE	bound_1h_6h	TRUE	TRUE
chr6	121245570	121246071	chr6	121244820	121246821	element_314	Poised	Active Enhancer	bound_1h_6h	TRUE	TRUE	bound_1h_6h	TRUE	TRUE
chr6	127245802	127246244	chr6	127245023	127247024	element_316	Poised	Repressed	bound_1h_6h	TRUE	TRUE	bound_6h	FALSE	TRUE
chr6	127446595	127447091	chr6	127445843	127447844	element_317	Repressed	Bivalent	unbound	FALSE	FALSE	bound_1h_6h	TRUE	TRUE
chr6	129180271	129180675	chr6	129179473	129181474	element_318	Active Enhancer	Active Promoter	bound_1h	TRUE	FALSE	bound_1h_6h	TRUE	TRUE
chr6	129230215	129230582	chr6	129229398	129231399	element_319	Repressed	Active Enhancer	unbound	FALSE	FALSE	bound_1h_6h	TRUE	TRUE
chr6	17655182	17655568	chr6	17654375	17656376	element_322	Repressed	Poised	bound_1h	TRUE	FALSE	bound_6h	FALSE	TRUE
chr6	28864706	28865130	chr6	28863918	28865919	element_323	Poised	Bivalent	unbound	FALSE	FALSE	bound_1h_6h	TRUE	TRUE
chr6	3399322	3399724	chr6	3398523	3400524	element_324	Poised	Repressed	bound_1h	TRUE	FALSE	bound_1h_6h	TRUE	TRUE
chr6	34862940	34863247	chr6	34862093	34864094	element_325	Poised	Active Enhancer	unbound	FALSE	FALSE	bound_1h	TRUE	FALSE
chr6	38353903	38354603	chr6	38353253	38355254	element_326	Active Promoter	Active Enhancer	bound_1h	TRUE	FALSE	bound_1h_6h	TRUE	TRUE
chr6	39117830	39118676	chr6	39117253	39119254	element_327	Bivalent	Active Promoter	bound_1h_6h	TRUE	TRUE	bound_1h_6h	TRUE	TRUE
chr6	49259691	49260039	chr6	49258865	49260866	element_328	Active Enhancer	Bivalent	unbound	FALSE	FALSE	bound_6h	FALSE	TRUE
chr6	52486724	52486965	chr6	52485844	52487845	element_329	Repressed	Bivalent	unbound	FALSE	FALSE	bound_6h	FALSE	TRUE
chr6	66916910	66917333	chr6	66916121	66918122	element_332	Repressed	Poised	unbound	FALSE	FALSE	bound_1h_6h	TRUE	TRUE
chr6	90531435	90531809	chr6	90530622	90532623	element_334	Poised	Poised	unbound	FALSE	FALSE	bound_6h	FALSE	TRUE
chr5	100587611	100588023	chr5	100586817	100588818	element_283	Repressed	Poised	unbound	FALSE	FALSE	bound_1h_6h	TRUE	TRUE
chr5	100636744	100637197	chr5	100635970	100637971	element_284	Repressed	Poised	bound_1h_6h	TRUE	TRUE	bound_1h_6h	TRUE	TRUE
chr5	103592785	103593279	chr5	103592032	103594033	element_285	Repressed	Poised	unbound	FALSE	FALSE	bound_1h_6h	TRUE	TRUE
chr5	105110231	105110518	chr5	105109374	105111375	element_286	Poised	Poised	unbound	FALSE	FALSE	bound_1h_6h	TRUE	TRUE
chr5	105239484	105239771	chr5	105238627	105240628	element_287	Repressed	Repressed	unbound	FALSE	FALSE	bound_6h	FALSE	TRUE
chr5	105293651	105294072	chr5	105292861	105294862	element_288	Poised	Bivalent	unbound	FALSE	FALSE	bound_1h_6h	TRUE	TRUE
chr5	114897217	114897770	chr5	114896493	114898494	element_290	Poised	Bivalent	bound_1h_6h	TRUE	TRUE	bound_1h_6h	TRUE	TRUE
chr5	120749487	120750276	chr5	120748881	120750882	element_291	Poised	Poised	bound_1h_6h	TRUE	TRUE	bound_1h_6h	TRUE	TRUE
chr5	120777511	120777888	chr5	120776699	120778700	element_292	Poised	Poised	unbound	FALSE	FALSE	bound_1h_6h	TRUE	TRUE
chr5	120812345	120812957	chr5	120811651	120813652	element_293	Active Enhancer	Active Enhancer	bound_1h_6h	TRUE	TRUE	bound_1h_6h	TRUE	TRUE
chr5	120907360	120907800	chr5	120906580	120908581	element_295	Bivalent	Poised	bound_1h_6h	TRUE	TRUE	bound_1h_6h	TRUE	TRUE
chr5	121383912	121384349	chr5	121383130	121385131	element_296	Poised	Bivalent	unbound	FALSE	FALSE	bound_1h_6h	TRUE	TRUE
chr5	137115985	137116480	chr5	137115232	137117233	element_299	Active Enhancer	Active Enhancer	bound_1h_6h	TRUE	TRUE	bound_1h_6h	TRUE	TRUE
chr5	21366628	21367079	chr5	21365853	21367854	element_300	Repressed	Poised	unbound	FALSE	FALSE	bound_6h	FALSE	TRUE
chr5	76051783	76052142	chr5	76050962	76052963	element_302	Repressed	Poised	unbound	FALSE	FALSE	bound_6h	FALSE	TRUE
chr5	90271409	90271774	chr5	90270591	90272592	element_303	Repressed	Repressed	unbound	FALSE	FALSE	bound_6h	FALSE	TRUE
chr5	92080249	92080647	chr5	92079448	92081449	element_304	Active Enhancer	Poised	unbound	FALSE	FALSE	bound_6h	FALSE	TRUE
chr5	92332329	92332677	chr5	92331503	92333504	element_305	Repressed	Bivalent	unbound	FALSE	FALSE	bound_1h_6h	TRUE	TRUE
chr5	92353421	92353842	chr5	92352631	92354632	element_306	Poised	Poised	unbound	FALSE	FALSE	bound_6h	FALSE	TRUE
chr5	92368363	92368743	chr5	92367553	92369554	element_307	Repressed	Bivalent	unbound	FALSE	FALSE	bound_1h_6h	TRUE	TRUE
chr5	92377148	92377490	chr5	92376319	92378320	element_308	Poised	Poised	unbound	FALSE	FALSE	bound_1h_6h	TRUE	TRUE
chr5	99214401	99214821	chr5	99213611	99215612	element_309	Repressed	Bivalent	unbound	FALSE	FALSE	bound_1h_6h	TRUE	TRUE
chr4	100275500	100275936	chr4	100274718	100276719	element_257	Repressed	Bivalent	unbound	FALSE	FALSE	bound_6h	FALSE	TRUE
chr4	101357355	101357757	chr4	101356556	101358557	element_258	Active Promoter	Active Promoter	unbound	FALSE	FALSE	bound_1h_6h	TRUE	TRUE
chr4	11900023	11900393	chr4	11899208	11901209	element_261	Repressed	Repressed	unbound	FALSE	FALSE	bound_1h_6h	TRUE	TRUE
chr4	129009813	129010109	chr4	129008961	129010962	element_263	Poised	Active Enhancer	unbound	FALSE	FALSE	bound_1h	TRUE	FALSE
chr4	130802006	130802560	chr4	130801283	130803284	element_266	Poised	Bivalent	unbound	FALSE	FALSE	bound_6h	FALSE	TRUE
chr4	136590005	136590644	chr4	136589324	136591325	element_269	Bivalent	Poised	bound_1h_6h	TRUE	TRUE	bound_1h_6h	TRUE	TRUE
chr4	149943249	149943504	chr4	149942376	149944377	element_272	Poised	Bivalent	unbound	FALSE	FALSE	bound_1h_6h	TRUE	TRUE
chr4	156200675	156201147	chr4	156199911	156201912	element_273	Poised	Active Enhancer	bound_1h_6h	TRUE	TRUE	bound_1h_6h	TRUE	TRUE
chr4	3929115	3929463	chr4	3928289	3930290	element_274	Poised	Bivalent	unbound	FALSE	FALSE	bound_6h	FALSE	TRUE
chr4	40239470	40240138	chr4	40238804	40240805	element_276	Active Enhancer	Active Promoter	bound_1h	TRUE	FALSE	bound_1h_6h	TRUE	TRUE
chr4	45972080	45972662	chr4	45971371	45973372	element_277	Poised	Active Promoter	bound_1h	TRUE	FALSE	bound_1h_6h	TRUE	TRUE
chr4	56222197	56222798	chr4	56221497	56223498	element_278	Poised	Bivalent	unbound	FALSE	FALSE	bound_6h	FALSE	TRUE
chr4	59224873	59225192	chr4	59224032	59226033	element_279	Repressed	Poised	unbound	FALSE	FALSE	bound_6h	FALSE	TRUE
chr4	63870776	63871068	chr4	63869922	63871923	element_280	Repressed	Bivalent	unbound	FALSE	FALSE	bound_6h	FALSE	TRUE
chr4	86074992	86075298	chr4	86074145	86076146	element_281	Repressed	Bivalent	unbound	FALSE	FALSE	bound_6h	FALSE	TRUE
chr3	104791965	104792324	chr3	104791144	104793145	element_238	Poised	Bivalent	unbound	FALSE	FALSE	bound_1h_6h	TRUE	TRUE
chr3	104817815	104818316	chr3	104817065	104819066	element_239	Active Promoter	Active Promoter	unbound	FALSE	FALSE	bound_1h_6h	TRUE	TRUE
chr3	107760122	107760448	chr3	107759285	107761286	element_240	Poised	Active Promoter	unbound	FALSE	FALSE	bound_6h	FALSE	TRUE
chr3	116047023	116047281	chr3	116046152	116048153	element_242	Repressed	Bivalent	unbound	FALSE	FALSE	bound_1h_6h	TRUE	TRUE
chr3	142530040	142530486	chr3	142529263	142531264	element_244	Poised	Active Enhancer	bound_1h_6h	TRUE	TRUE	bound_1h_6h	TRUE	TRUE
chr3	142559771	142560259	chr3	142559015	142561016	element_245	Poised	Active Enhancer	bound_1h_6h	TRUE	TRUE	bound_1h_6h	TRUE	TRUE
chr3	145102058	145102511	chr3	145101284	145103285	element_246	Repressed	Bivalent	unbound	FALSE	FALSE	bound_1h_6h	TRUE	TRUE
chr3	151749708	151750117	chr3	151748912	151750913	element_248	Repressed	Bivalent	unbound	FALSE	FALSE	bound_1h_6h	TRUE	TRUE
chr3	154692199	154692500	chr3	154691349	154693350	element_249	Poised	Bivalent	bound_1h	TRUE	FALSE	bound_1h	TRUE	FALSE
chr3	40453210	40453535	chr3	40452372	40454373	element_251	Poised	Active Enhancer	unbound	FALSE	FALSE	bound_6h	FALSE	TRUE
chr3	40714612	40714877	chr3	40713744	40715745	element_252	Repressed	Repressed	bound_1h	TRUE	FALSE	bound_6h	FALSE	TRUE
chr3	89730475	89731055	chr3	89729765	89731766	element_256	Active Enhancer	Active Enhancer	bound_1h_6h	TRUE	TRUE	bound_1h_6h	TRUE	TRUE
chr2	103117158	103117568	chr2	103116363	103118364	element_201	Repressed	Repressed	unbound	FALSE	FALSE	bound_6h	FALSE	TRUE
chr2	117018556	117018704	chr2	117017630	117019631	element_202	Active Enhancer	Bivalent	unbound	FALSE	FALSE	bound_1h	TRUE	FALSE
chr2	118035287	118035621	chr2	118034454	118036455	element_203	Repressed	Bivalent	unbound	FALSE	FALSE	bound_6h	FALSE	TRUE
chr2	119478116	119478456	chr2	119477286	119479287	element_204	Active Promoter	Active Promoter	unbound	FALSE	FALSE	bound_1h_6h	TRUE	TRUE
chr2	122147420	122147679	chr2	122146549	122148550	element_206	Active Enhancer	Active Promoter	unbound	FALSE	FALSE	bound_1h_6h	TRUE	TRUE
chr2	122164244	122164614	chr2	122163429	122165430	element_207	Poised	Active Enhancer	unbound	FALSE	FALSE	bound_1h_6h	TRUE	TRUE
chr2	126933009	126933424	chr2	126932216	126934217	element_208	Active Promoter	Active Promoter	unbound	FALSE	FALSE	bound_1h_6h	TRUE	TRUE
chr2	128420424	128420694	chr2	128419559	128421560	element_209	Repressed	Bivalent	unbound	FALSE	FALSE	bound_6h	FALSE	TRUE
chr2	145905194	145905532	chr2	145904363	145906364	element_210	Bivalent	Bivalent	unbound	FALSE	FALSE	bound_6h	FALSE	TRUE
chr2	147012498	147012846	chr2	147011672	147013673	element_211	Active Promoter	Active Promoter	unbound	FALSE	FALSE	bound_6h	FALSE	TRUE
chr2	152876375	152876688	chr2	152875531	152877532	element_213	Poised	Poised	unbound	FALSE	FALSE	bound_6h	FALSE	TRUE
chr2	154658015	154658316	chr2	154657165	154659166	element_214	Active Promoter	Active Promoter	unbound	FALSE	FALSE	bound_1h_6h	TRUE	TRUE
chr2	156857432	156857649	chr2	156856540	156858541	element_215	Poised	Poised	unbound	FALSE	FALSE	bound_6h	FALSE	TRUE
chr2	157135220	157135473	chr2	157134346	157136347	element_216	Active Promoter	Active Promoter	unbound	FALSE	FALSE	bound_1h	TRUE	FALSE
chr2	167351436	167351774	chr2	167350605	167352606	element_219	Poised	Active Enhancer	unbound	FALSE	FALSE	bound_6h	FALSE	TRUE
chr2	167505202	167505644	chr2	167504423	167506424	element_220	Poised	Active Enhancer	unbound	FALSE	FALSE	bound_1h_6h	TRUE	TRUE
chr2	173218772	173219151	chr2	173217961	173219962	element_221	Poised	Bivalent	bound_1h_6h	TRUE	TRUE	bound_1h_6h	TRUE	TRUE
chr2	180589179	180589804	chr2	180588491	180590492	element_222	Active Enhancer	Active Promoter	bound_1h	TRUE	FALSE	bound_1h_6h	TRUE	TRUE
chr2	181241733	181242192	chr2	181240962	181242963	element_223	Poised	Active Enhancer	bound_1h	TRUE	FALSE	bound_1h_6h	TRUE	TRUE
chr2	18821644	18822114	chr2	18820879	18822880	element_224	Repressed	Active Enhancer	unbound	FALSE	FALSE	bound_6h	FALSE	TRUE
chr2	26493499	26493771	chr2	26492635	26494636	element_225	Active Enhancer	Active Enhancer	unbound	FALSE	FALSE	bound_1h	TRUE	FALSE
chr2	29965253	29965481	chr2	29964367	29966368	element_226	Active Promoter	Active Promoter	unbound	FALSE	FALSE	bound_1h	TRUE	FALSE
chr2	30133018	30133344	chr2	30132181	30134182	element_227	Active Promoter	Active Promoter	unbound	FALSE	FALSE	bound_6h	FALSE	TRUE
chr2	62645997	62646468	chr2	62645232	62647233	element_229	Poised	Bivalent	bound_1h	TRUE	FALSE	bound_1h_6h	TRUE	TRUE
chr2	79087226	79087596	chr2	79086411	79088412	element_231	Repressed	Bivalent	unbound	FALSE	FALSE	bound_1h_6h	TRUE	TRUE
chr2	79349057	79349376	chr2	79348216	79350217	element_232	Repressed	Repressed	unbound	FALSE	FALSE	bound_6h	FALSE	TRUE
chr2	84774857	84775109	chr2	84773983	84775984	element_233	Active Enhancer	Bivalent	bound_1h	TRUE	FALSE	bound_1h_6h	TRUE	TRUE
chr2	84800343	84800685	chr2	84799514	84801515	element_234	Poised	Bivalent	unbound	FALSE	FALSE	bound_1h_6h	TRUE	TRUE
chr2	90746080	90746406	chr2	90745243	90747244	element_235	Active Promoter	Active Promoter	unbound	FALSE	FALSE	bound_1h_6h	TRUE	TRUE
chr19	11494528	11494896	chr19	11493712	11495713	element_193	Repressed	Repressed	unbound	FALSE	FALSE	bound_6h	FALSE	TRUE
chr19	11540131	11540595	chr19	11539363	11541364	element_194	Repressed	Repressed	unbound	FALSE	FALSE	bound_1h_6h	TRUE	TRUE
chr19	29366892	29367338	chr19	29366115	29368116	element_195	Poised	Bivalent	unbound	FALSE	FALSE	bound_1h_6h	TRUE	TRUE
chr19	34553401	34553903	chr19	34552652	34554653	element_196	Repressed	Active Enhancer	unbound	FALSE	FALSE	bound_1h_6h	TRUE	TRUE
chr19	34607388	34607985	chr19	34606686	34608687	element_197	Repressed	Bivalent	unbound	FALSE	FALSE	bound_1h_6h	TRUE	TRUE
chr19	34640590	34641048	chr19	34639819	34641820	element_198	Poised	Active Enhancer	bound_1h_6h	TRUE	TRUE	bound_1h_6h	TRUE	TRUE
chr19	37208215	37208555	chr19	37207385	37209386	element_199	Active Promoter	Active Promoter	bound_1h_6h	TRUE	TRUE	bound_1h_6h	TRUE	TRUE
chr19	6045968	6046256	chr19	6045112	6047113	element_200	Active Promoter	Active Promoter	unbound	FALSE	FALSE	bound_6h	FALSE	TRUE
chr18	13941755	13942042	chr18	13940898	13942899	element_181	Repressed	Bivalent	unbound	FALSE	FALSE	bound_1h_6h	TRUE	TRUE
chr18	36027108	36027467	chr18	36026287	36028288	element_183	Poised	Poised	bound_1h_6h	TRUE	TRUE	bound_6h	FALSE	TRUE
chr18	44380982	44381353	chr18	44380167	44382168	element_184	Active Promoter	Active Promoter	unbound	FALSE	FALSE	bound_6h	FALSE	TRUE
chr18	60211733	60212088	chr18	60210910	60212911	element_186	Repressed	Poised	unbound	FALSE	FALSE	bound_1h_6h	TRUE	TRUE
chr18	60238665	60239023	chr18	60237844	60239845	element_187	Repressed	Poised	unbound	FALSE	FALSE	bound_1h_6h	TRUE	TRUE
chr18	60439025	60439458	chr18	60438241	60440242	element_188	Repressed	Repressed	unbound	FALSE	FALSE	bound_1h_6h	TRUE	TRUE
chr18	6319621	6320015	chr18	6318818	6320819	element_190	Repressed	Repressed	unbound	FALSE	FALSE	bound_1h_6h	TRUE	TRUE
chr18	70420370	70420550	chr18	70419460	70421461	element_191	Repressed	Bivalent	unbound	FALSE	FALSE	bound_1h	TRUE	FALSE
chr17	27826211	27826555	chr17	27825383	27827384	element_156	Active Enhancer	Active Enhancer	unbound	FALSE	FALSE	bound_1h	TRUE	FALSE
chr17	29398337	29398618	chr17	29397477	29399478	element_158	Poised	Bivalent	unbound	FALSE	FALSE	bound_1h_6h	TRUE	TRUE
chr17	29442057	29442344	chr17	29441200	29443201	element_159	Poised	Poised	unbound	FALSE	FALSE	unbound	FALSE	FALSE
chr17	29660480	29660854	chr17	29659667	29661668	element_160	Active Promoter	Active Promoter	bound_1h	TRUE	FALSE	bound_1h_6h	TRUE	TRUE
chr17	33902457	33902793	chr17	33901625	33903626	element_162	Active Enhancer	Repressed	unbound	FALSE	FALSE	bound_6h	FALSE	TRUE
chr17	33909960	33910355	chr17	33909157	33911158	element_163	Active Promoter	Active Enhancer	unbound	FALSE	FALSE	bound_1h_6h	TRUE	TRUE
chr17	34121091	34121334	chr17	34120212	34122213	element_165	Active Promoter	Active Promoter	unbound	FALSE	FALSE	bound_1h	TRUE	FALSE
chr17	34187534	34187993	chr17	34186763	34188764	element_166	Active Enhancer	Active Promoter	bound_1h	TRUE	FALSE	bound_1h_6h	TRUE	TRUE
chr17	34198176	34198542	chr17	34197359	34199360	element_167	Repressed	Active Enhancer	unbound	FALSE	FALSE	bound_1h_6h	TRUE	TRUE
chr17	34879521	34879823	chr17	34878672	34880673	element_168	Poised	Poised	unbound	FALSE	FALSE	bound_6h	FALSE	TRUE
chr17	36020587	36021165	chr17	36019876	36021877	element_169	Poised	Active Enhancer	bound_1h_6h	TRUE	TRUE	bound_1h_6h	TRUE	TRUE
chr17	36023529	36023949	chr17	36022739	36024740	element_170	Poised	Bivalent	bound_1h_6h	TRUE	TRUE	bound_1h_6h	TRUE	TRUE
chr17	41251184	41251437	chr17	41250310	41252311	element_172	Repressed	Repressed	unbound	FALSE	FALSE	bound_6h	FALSE	TRUE
chr17	53478643	53478820	chr17	53477731	53479732	element_173	Active Promoter	Active Promoter	unbound	FALSE	FALSE	bound_1h	TRUE	FALSE
chr17	63738189	63738425	chr17	63737307	63739308	element_175	Repressed	Poised	unbound	FALSE	FALSE	bound_6h	FALSE	TRUE
chr17	74668104	74668413	chr17	74667258	74669259	element_177	Repressed	Poised	unbound	FALSE	FALSE	bound_6h	FALSE	TRUE
chr17	78248962	78249257	chr17	78248109	78250110	element_178	Repressed	Active Enhancer	unbound	FALSE	FALSE	bound_6h	FALSE	TRUE
chr17	78882304	78882748	chr17	78881526	78883527	element_179	Active Promoter	Active Enhancer	bound_1h_6h	TRUE	TRUE	bound_1h_6h	TRUE	TRUE
chr17	79821074	79821441	chr17	79820257	79822258	element_180	Repressed	Bivalent	unbound	FALSE	FALSE	bound_1h_6h	TRUE	TRUE
chr16	10785400	10785836	chr16	10784618	10786619	element_136	Active Promoter	Active Promoter	bound_1h	TRUE	FALSE	bound_1h_6h	TRUE	TRUE
chr16	10814724	10815052	chr16	10813888	10815889	element_137	Poised	Poised	bound_1h_6h	TRUE	TRUE	bound_6h	FALSE	TRUE
chr16	20808267	20808496	chr16	20807381	20809382	element_138	Poised	Poised	unbound	FALSE	FALSE	bound_6h	FALSE	TRUE
chr16	22070651	22071011	chr16	22069831	22071832	element_139	Poised	Poised	unbound	FALSE	FALSE	bound_6h	FALSE	TRUE
chr16	23609351	23610256	chr16	23608803	23610804	element_140	Poised	Active Enhancer	bound_1h_6h	TRUE	TRUE	bound_1h_6h	TRUE	TRUE
chr16	31314825	31315341	chr16	31314083	31316084	element_141	Poised	Bivalent	unbound	FALSE	FALSE	bound_1h_6h	TRUE	TRUE
chr16	35871191	35871749	chr16	35870470	35872471	element_143	Active Enhancer	Active Enhancer	unbound	FALSE	FALSE	bound_1h_6h	TRUE	TRUE
chr16	35918956	35919456	chr16	35918206	35920207	element_144	Repressed	Repressed	unbound	FALSE	FALSE	bound_6h	FALSE	TRUE
chr16	35938611	35939225	chr16	35937918	35939919	element_145	Active Enhancer	Active Promoter	bound_1h	TRUE	FALSE	bound_1h_6h	TRUE	TRUE
chr16	44676585	44676875	chr16	44675730	44677731	element_146	Repressed	Poised	unbound	FALSE	FALSE	bound_1h	TRUE	FALSE
chr16	49857476	49857913	chr16	49856694	49858695	element_148	Poised	Bivalent	unbound	FALSE	FALSE	bound_1h_6h	TRUE	TRUE
chr16	84621428	84621583	chr16	84620505	84622506	element_150	Repressed	Poised	unbound	FALSE	FALSE	bound_1h	TRUE	FALSE
chr16	97462842	97463164	chr16	97462003	97464004	element_152	Poised	Poised	unbound	FALSE	FALSE	bound_6h	FALSE	TRUE
chr16	97534620	97535385	chr16	97534002	97536003	element_153	Poised	Active Enhancer	bound_1h_6h	TRUE	TRUE	bound_1h_6h	TRUE	TRUE
chr16	97535744	97536163	chr16	97534953	97536954	element_154	Poised	Active Enhancer	bound_1h_6h	TRUE	TRUE	bound_1h_6h	TRUE	TRUE
chr15	12549521	12549809	chr15	12548665	12550666	element_122	Active Enhancer	Active Enhancer	bound_1h	TRUE	FALSE	bound_6h	FALSE	TRUE
chr15	6874295	6874515	chr15	6873405	6875406	element_124	Poised	Active Promoter	unbound	FALSE	FALSE	bound_1h	TRUE	FALSE
chr15	74960661	74961209	chr15	74959935	74961936	element_125	Poised	Poised	bound_1h_6h	TRUE	TRUE	bound_1h_6h	TRUE	TRUE
chr15	74967651	74968294	chr15	74966972	74968973	element_126	Poised	Active Enhancer	bound_1h_6h	TRUE	TRUE	bound_1h_6h	TRUE	TRUE
chr15	74989179	74989764	chr15	74988471	74990472	element_127	Poised	Active Enhancer	bound_1h_6h	TRUE	TRUE	bound_1h_6h	TRUE	TRUE
chr15	76243155	76243588	chr15	76242371	76244372	element_129	Poised	Active Enhancer	bound_1h	TRUE	FALSE	bound_1h_6h	TRUE	TRUE
chr15	7670031	7670412	chr15	7669221	7671222	element_130	Repressed	Poised	unbound	FALSE	FALSE	bound_6h	FALSE	TRUE
chr15	77044875	77045108	chr15	77043991	77045992	element_131	Poised	Active Enhancer	unbound	FALSE	FALSE	bound_1h_6h	TRUE	TRUE
chr15	77058635	77059172	chr15	77057903	77059904	element_132	Bivalent	Poised	bound_1h_6h	TRUE	TRUE	bound_6h	FALSE	TRUE
chr15	79403263	79403818	chr15	79402540	79404541	element_133	Active Promoter	Active Promoter	bound_1h_6h	TRUE	TRUE	bound_1h_6h	TRUE	TRUE
chr15	93654393	93654726	chr15	93653559	93655560	element_135	Repressed	Bivalent	unbound	FALSE	FALSE	bound_1h_6h	TRUE	TRUE
chr14	55603810	55604546	chr14	55603178	55605179	element_115	Active Enhancer	Active Enhancer	bound_1h_6h	TRUE	TRUE	bound_1h_6h	TRUE	TRUE
chr14	59365219	59365663	chr14	59364441	59366442	element_116	Poised	Bivalent	unbound	FALSE	FALSE	bound_1h_6h	TRUE	TRUE
chr13	104285831	104286283	chr13	104285057	104287058	element_104	Bivalent	Active Enhancer	unbound	FALSE	FALSE	bound_1h_6h	TRUE	TRUE
chr13	107741935	107742324	chr13	107741129	107743130	element_105	Repressed	Repressed	unbound	FALSE	FALSE	bound_1h_6h	TRUE	TRUE
chr13	23445921	23446121	chr13	23445021	23447022	element_106	Active Promoter	Active Promoter	unbound	FALSE	FALSE	bound_1h	TRUE	FALSE
chr13	24268036	24268458	chr13	24267247	24269248	element_107	Poised	Poised	unbound	FALSE	FALSE	bound_6h	FALSE	TRUE
chr13	32924960	32925288	chr13	32924124	32926125	element_108	Repressed	Poised	unbound	FALSE	FALSE	bound_6h	FALSE	TRUE
chr13	50418736	50419127	chr13	50417931	50419932	element_111	Active Enhancer	Active Enhancer	unbound	FALSE	FALSE	bound_1h_6h	TRUE	TRUE
chr13	56116031	56116433	chr13	56115232	56117233	element_112	Active Enhancer	Active Enhancer	bound_1h	TRUE	FALSE	bound_1h_6h	TRUE	TRUE
chr13	69534762	69535081	chr13	69533921	69535922	element_113	Active Promoter	Active Promoter	bound_1h	TRUE	FALSE	bound_1h_6h	TRUE	TRUE
chr12	84762379	84762807	chr12	84761593	84763594	element_100	Poised	Poised	unbound	FALSE	FALSE	bound_1h_6h	TRUE	TRUE
chr12	8922393	8922783	chr12	8921588	8923589	element_103	Active Promoter	Active Promoter	unbound	FALSE	FALSE	bound_6h	FALSE	TRUE
chr12	103433685	103434569	chr12	103433127	103435128	element_90	Repressed	Active Enhancer	bound_1h_6h	TRUE	TRUE	bound_1h_6h	TRUE	TRUE
chr12	26464337	26464692	chr12	26463514	26465515	element_94	Repressed	Repressed	unbound	FALSE	FALSE	bound_6h	FALSE	TRUE
chr12	26469039	26469551	chr12	26468295	26470296	element_95	Active Enhancer	Active Enhancer	bound_1h	TRUE	FALSE	bound_1h_6h	TRUE	TRUE
chr12	32820864	32821372	chr12	32820118	32822119	element_96	Active Promoter	Active Promoter	unbound	FALSE	FALSE	bound_1h_6h	TRUE	TRUE
chr12	58851888	58852220	chr12	58851054	58853055	element_97	Repressed	Repressed	unbound	FALSE	FALSE	bound_6h	FALSE	TRUE
chr12	75622819	75623149	chr12	75621984	75623985	element_98	Repressed	Bivalent	unbound	FALSE	FALSE	bound_6h	FALSE	TRUE
chr12	80811978	80812165	chr12	80811071	80813072	element_99	Bivalent	Active Enhancer	unbound	FALSE	FALSE	bound_1h	TRUE	FALSE
chr11	100355467	100355670	chr11	100354568	100356569	element_46	Active Promoter	Bivalent	unbound	FALSE	FALSE	bound_6h	FALSE	TRUE
chr11	100704075	100704441	chr11	100703258	100705259	element_47	Poised	Active Enhancer	unbound	FALSE	FALSE	bound_1h_6h	TRUE	TRUE
chr11	101448260	101448643	chr11	101447451	101449452	element_48	Active Enhancer	Active Enhancer	unbound	FALSE	FALSE	bound_1h_6h	TRUE	TRUE
chr11	109362377	109362711	chr11	109361544	109363545	element_49	Active Promoter	Active Promoter	bound_1h	TRUE	FALSE	bound_1h	TRUE	FALSE
chr11	117989871	117990134	chr11	117989002	117991003	element_51	Poised	Active Enhancer	unbound	FALSE	FALSE	bound_1h	TRUE	FALSE
chr11	118401808	118402154	chr11	118400981	118402982	element_52	Poised	Active Enhancer	unbound	FALSE	FALSE	bound_1h	TRUE	FALSE
chr11	119392768	119393465	chr11	119392116	119394117	element_54	Active Enhancer	Active Enhancer	bound_1h_6h	TRUE	TRUE	bound_1h_6h	TRUE	TRUE
chr11	121090991	121091395	chr11	121090193	121092194	element_55	Poised	Poised	unbound	FALSE	FALSE	bound_6h	FALSE	TRUE
chr11	121550054	121550536	chr11	121549295	121551296	element_56	Poised	Bivalent	unbound	FALSE	FALSE	bound_1h_6h	TRUE	TRUE
chr11	20712152	20712471	chr11	20711311	20713312	element_57	Repressed	Bivalent	unbound	FALSE	FALSE	bound_6h	FALSE	TRUE
chr11	29130360	29130878	chr11	29129619	29131620	element_59	Active Promoter	Active Promoter	bound_1h_6h	TRUE	TRUE	bound_1h_6h	TRUE	TRUE
chr11	30244099	30244363	chr11	30243231	30245232	element_60	Poised	Active Enhancer	unbound	FALSE	FALSE	bound_6h	FALSE	TRUE
chr11	43767099	43767506	chr11	43766302	43768303	element_61	Poised	Poised	bound_1h	TRUE	FALSE	bound_1h_6h	TRUE	TRUE
chr11	48871114	48871830	chr11	48870472	48872473	element_62	Bivalent	Active Promoter	bound_1h_6h	TRUE	TRUE	bound_1h_6h	TRUE	TRUE
chr11	48927045	48927474	chr11	48926259	48928260	element_63	Repressed	Poised	unbound	FALSE	FALSE	bound_1h_6h	TRUE	TRUE
chr11	48992169	48992612	chr11	48991390	48993391	element_64	Poised	Poised	bound_1h_6h	TRUE	TRUE	bound_1h_6h	TRUE	TRUE
chr11	48994056	48994486	chr11	48993271	48995272	element_65	Repressed	Poised	unbound	FALSE	FALSE	bound_1h_6h	TRUE	TRUE
chr11	49081400	49081842	chr11	49080621	49082622	element_66	Repressed	Poised	bound_1h_6h	TRUE	TRUE	bound_1h_6h	TRUE	TRUE
chr11	49086763	49087181	chr11	49085972	49087973	element_67	Repressed	Bivalent	unbound	FALSE	FALSE	bound_1h_6h	TRUE	TRUE
chr11	53762792	53763269	chr11	53762030	53764031	element_68	Active Enhancer	Active Enhancer	bound_1h	TRUE	FALSE	bound_1h_6h	TRUE	TRUE
chr11	53763443	53763607	chr11	53762525	53764526	element_69	Active Enhancer	Active Enhancer	unbound	FALSE	FALSE	bound_1h	TRUE	FALSE
chr11	53763710	53764185	chr11	53762947	53764948	element_70	Active Enhancer	Active Enhancer	bound_1h	TRUE	FALSE	bound_1h_6h	TRUE	TRUE
chr11	53769754	53770075	chr11	53768914	53770915	element_71	Active Promoter	Active Enhancer	bound_1h	TRUE	FALSE	bound_6h	FALSE	TRUE
chr11	58183615	58183980	chr11	58182797	58184798	element_72	Repressed	Poised	unbound	FALSE	FALSE	bound_1h_6h	TRUE	TRUE
chr11	58199332	58199654	chr11	58198493	58200494	element_73	Poised	Poised	bound_1h_6h	TRUE	TRUE	bound_1h_6h	TRUE	TRUE
chr11	58214690	58215094	chr11	58213892	58215893	element_75	Poised	Bivalent	bound_1h	TRUE	FALSE	bound_1h_6h	TRUE	TRUE
chr11	72301391	72301992	chr11	72300691	72302692	element_76	Active Enhancer	Active Enhancer	bound_1h_6h	TRUE	TRUE	bound_1h_6h	TRUE	TRUE
chr11	72690183	72690594	chr11	72689388	72691389	element_77	Active Promoter	Active Promoter	bound_1h	TRUE	FALSE	bound_1h_6h	TRUE	TRUE
chr11	81614297	81614565	chr11	81613431	81615432	element_79	Active Enhancer	Poised	unbound	FALSE	FALSE	bound_6h	FALSE	TRUE
chr11	82000433	82000842	chr11	81999637	82001638	element_80	Repressed	Poised	unbound	FALSE	FALSE	bound_1h_6h	TRUE	TRUE
chr11	82039149	82039454	chr11	82038301	82040302	element_81	Repressed	Active Enhancer	unbound	FALSE	FALSE	bound_1h_6h	TRUE	TRUE
chr11	82952627	82953013	chr11	82951820	82953821	element_82	Poised	Repressed	unbound	FALSE	FALSE	bound_6h	FALSE	TRUE
chr11	82991795	82992019	chr11	82990907	82992908	element_83	Poised	Bivalent	unbound	FALSE	FALSE	bound_6h	FALSE	TRUE
chr11	83077952	83078481	chr11	83077216	83079217	element_84	Repressed	Poised	bound_1h_6h	TRUE	TRUE	bound_1h_6h	TRUE	TRUE
chr11	83118149	83118403	chr11	83117276	83119277	element_85	Repressed	Repressed	unbound	FALSE	FALSE	bound_6h	FALSE	TRUE
chr11	88999207	88999739	chr11	88998473	89000474	element_87	Active Promoter	Active Enhancer	bound_1h	TRUE	FALSE	bound_1h_6h	TRUE	TRUE
chr11	97127002	97127283	chr11	97126142	97128143	element_89	Poised	Bivalent	unbound	FALSE	FALSE	bound_1h	TRUE	FALSE
chr10	107952557	107952905	chr10	107951731	107953732	element_32	Repressed	Bivalent	unbound	FALSE	FALSE	bound_6h	FALSE	TRUE
chr10	109986181	109986518	chr10	109985349	109987350	element_33	Repressed	Bivalent	unbound	FALSE	FALSE	bound_1h	TRUE	FALSE
chr10	128270005	128270563	chr10	128269284	128271285	element_35	Active Promoter	Active Promoter	bound_1h_6h	TRUE	TRUE	bound_1h_6h	TRUE	TRUE
chr10	50592084	50592644	chr10	50591364	50593365	element_39	Active Promoter	Active Promoter	bound_1h	TRUE	FALSE	bound_1h_6h	TRUE	TRUE
chr10	58446255	58446587	chr10	58445421	58447422	element_40	Active Promoter	Active Promoter	unbound	FALSE	FALSE	bound_6h	FALSE	TRUE
chr10	83836296	83836645	chr10	83835470	83837471	element_43	Repressed	Bivalent	unbound	FALSE	FALSE	bound_1h_6h	TRUE	TRUE
chr1	105971824	105972289	chr1	105971056	105973057	element_1	Repressed	Poised	unbound	FALSE	FALSE	bound_1h_6h	TRUE	TRUE
chr1	156344438	156344745	chr1	156343591	156345592	element_10	Repressed	Repressed	unbound	FALSE	FALSE	bound_6h	FALSE	TRUE
chr1	156674278	156674802	chr1	156673540	156675541	element_11	Active Enhancer	Active Enhancer	bound_1h	TRUE	FALSE	bound_1h_6h	TRUE	TRUE
chr1	172711511	172711776	chr1	172710643	172712644	element_13	Poised	Poised	unbound	FALSE	FALSE	bound_6h	FALSE	TRUE
chr1	173766925	173767308	chr1	173766116	173768117	element_14	Repressed	Active Enhancer	unbound	FALSE	FALSE	bound_1h_6h	TRUE	TRUE
chr1	173912860	173913371	chr1	173912115	173914116	element_15	Repressed	Active Enhancer	unbound	FALSE	FALSE	bound_1h_6h	TRUE	TRUE
chr1	173942423	173942625	chr1	173941524	173943525	element_16	Repressed	Poised	unbound	FALSE	FALSE	bound_1h	TRUE	FALSE
chr1	185047897	185048282	chr1	185047089	185049090	element_18	Repressed	Poised	unbound	FALSE	FALSE	bound_6h	FALSE	TRUE
chr1	35274687	35275064	chr1	35273875	35275876	element_22	Repressed	Bivalent	unbound	FALSE	FALSE	bound_6h	FALSE	TRUE
chr1	37889887	37890544	chr1	37889215	37891216	element_23	Active Promoter	Active Promoter	bound_1h_6h	TRUE	TRUE	bound_1h_6h	TRUE	TRUE
chr1	45723398	45723646	chr1	45722522	45724523	element_24	Repressed	Bivalent	unbound	FALSE	FALSE	bound_1h_6h	TRUE	TRUE
chr1	47398816	47399243	chr1	47398029	47400030	element_25	Repressed	Active Enhancer	unbound	FALSE	FALSE	bound_1h_6h	TRUE	TRUE
chr1	52113577	52114147	chr1	52112862	52114863	element_26	Poised	Active Enhancer	bound_1h	TRUE	FALSE	bound_1h_6h	TRUE	TRUE
chr1	57849817	57850211	chr1	57849014	57851015	element_28	Repressed	Bivalent	unbound	FALSE	FALSE	bound_1h_6h	TRUE	TRUE
chr1	79766285	79766563	chr1	79765424	79767425	element_29	Repressed	Repressed	unbound	FALSE	FALSE	bound_6h	FALSE	TRUE
chr1	80622510	80622974	chr1	80621742	80623743	element_30	Bivalent	Poised	bound_1h	TRUE	FALSE	bound_6h	FALSE	TRUE
chr1	85649833	85650219	chr1	85649026	85651027	element_31	Repressed	Repressed	unbound	FALSE	FALSE	bound_6h	FALSE	TRUE
chr1	128078991	128079447	chr1	128078219	128080220	element_4	Repressed	Poised	unbound	FALSE	FALSE	bound_1h_6h	TRUE	TRUE
chr1	131446591	131446949	chr1	131445770	131447771	element_5	Poised	Bivalent	unbound	FALSE	FALSE	bound_1h_6h	TRUE	TRUE
chr1	149833912	149834212	chr1	149833062	149835063	element_6	Repressed	Active Enhancer	unbound	FALSE	FALSE	bound_6h	FALSE	TRUE
chr1	152904334	152904790	chr1	152903562	152905563	element_8	Active Enhancer	Bivalent	unbound	FALSE	FALSE	bound_1h_6h	TRUE	TRUE
chr1	156037191	156037622	chr1	156036406	156038407	element_9	Active Promoter	Active Promoter	bound_1h_6h	TRUE	TRUE	bound_1h_6h	TRUE	TRUE
chr12	86329089	86329320	chr12	86328204	86330205	element_101	Poised	Repressed	bound_1h	TRUE	FALSE	unbound	FALSE	FALSE
chr12	86501727	86501941	chr12	86500834	86502835	element_102	Active Promoter	Repressed	bound_1h	TRUE	FALSE	unbound	FALSE	FALSE
chr13	34109018	34109219	chr13	34108118	34110119	element_109	Active Enhancer	Poised	bound_1h	TRUE	FALSE	unbound	FALSE	FALSE
chr13	44722214	44722444	chr13	44721329	44723330	element_110	Active Enhancer	Repressed	bound_1h	TRUE	FALSE	unbound	FALSE	FALSE
chr14	27436937	27437276	chr14	27436106	27438107	element_114	Active Enhancer	Repressed	bound_1h	TRUE	FALSE	unbound	FALSE	FALSE
chr14	63500455	63500666	chr14	63499560	63501561	element_117	Active Promoter	Repressed	bound_1h	TRUE	FALSE	unbound	FALSE	FALSE
chr14	77904166	77904518	chr14	77903342	77905343	element_118	Repressed	Poised	bound_1h	TRUE	FALSE	unbound	FALSE	FALSE
chr14	79481752	79482069	chr14	79480910	79482911	element_119	Active Promoter	Active Promoter	bound_1h	TRUE	FALSE	unbound	FALSE	FALSE
chr1	156956474	156956723	chr1	156955598	156957599	element_12	Active Enhancer	Repressed	bound_1h	TRUE	FALSE	unbound	FALSE	FALSE
chr14	7953966	7954186	chr14	7953076	7955077	element_120	Active Enhancer	Bivalent	bound_1h	TRUE	FALSE	unbound	FALSE	FALSE
chr14	99339715	99340008	chr14	99338861	99340862	element_121	Active Enhancer	Repressed	bound_1h	TRUE	FALSE	unbound	FALSE	FALSE
chr15	25770039	25770242	chr15	25769140	25771141	element_123	Active Enhancer	Poised	bound_1h	TRUE	FALSE	unbound	FALSE	FALSE
chr15	75634352	75634586	chr15	75633469	75635470	element_128	Active Enhancer	Repressed	bound_1h	TRUE	FALSE	unbound	FALSE	FALSE
chr15	81522051	81522270	chr15	81521160	81523161	element_134	Active Promoter	Active Enhancer	bound_6h	FALSE	TRUE	unbound	FALSE	FALSE
chr16	35869105	35869410	chr16	35868257	35870258	element_142	Active Enhancer	Poised	bound_1h	TRUE	FALSE	unbound	FALSE	FALSE
chr16	48435610	48435978	chr16	48434794	48436795	element_147	Active Enhancer	Repressed	bound_1h	TRUE	FALSE	unbound	FALSE	FALSE
chr16	69078212	69078436	chr16	69077324	69079325	element_149	Repressed	Repressed	bound_6h	FALSE	TRUE	unbound	FALSE	FALSE
chr16	93816208	93816792	chr16	93815500	93817501	element_151	Active Promoter	Active Enhancer	bound_1h_6h	TRUE	TRUE	unbound	FALSE	FALSE
chr17	10367141	10367471	chr17	10366306	10368307	element_155	Active Enhancer	Poised	bound_1h	TRUE	FALSE	unbound	FALSE	FALSE
chr17	29082027	29082285	chr17	29081156	29083157	element_157	Active Enhancer	Active Enhancer	bound_1h	TRUE	FALSE	unbound	FALSE	FALSE
chr17	31819386	31819567	chr17	31818476	31820477	element_161	Active Enhancer	Poised	bound_1h	TRUE	FALSE	unbound	FALSE	FALSE
chr17	33919497	33919704	chr17	33918600	33920601	element_164	Active Promoter	Active Enhancer	bound_1h	TRUE	FALSE	unbound	FALSE	FALSE
chr1	182030271	182030764	chr1	182029517	182031518	element_17	Active Promoter	Poised	bound_1h	TRUE	FALSE	unbound	FALSE	FALSE
chr17	36836909	36837116	chr17	36836012	36838013	element_171	Active Promoter	Active Promoter	bound_1h	TRUE	FALSE	unbound	FALSE	FALSE
chr17	53569777	53570201	chr17	53568989	53570990	element_174	Active Enhancer	Active Enhancer	bound_1h_6h	TRUE	TRUE	unbound	FALSE	FALSE
chr17	71485802	71486113	chr17	71484957	71486958	element_176	Bivalent	Bivalent	bound_1h_6h	TRUE	TRUE	unbound	FALSE	FALSE
chr18	24444265	24444711	chr18	24443488	24445489	element_182	Poised	Repressed	bound_1h	TRUE	FALSE	unbound	FALSE	FALSE
chr18	58654939	58655186	chr18	58654062	58656063	element_185	Poised	Repressed	bound_1h	TRUE	FALSE	unbound	FALSE	FALSE
chr18	60843853	60844228	chr18	60843040	60845041	element_189	Active Enhancer	Poised	bound_1h_6h	TRUE	TRUE	unbound	FALSE	FALSE
chr1	189729609	189729815	chr1	189728712	189730713	element_19	Bivalent	Active Promoter	bound_6h	FALSE	TRUE	unbound	FALSE	FALSE
chr18	75464934	75465279	chr18	75464106	75466107	element_192	Active Enhancer	Poised	bound_1h	TRUE	FALSE	unbound	FALSE	FALSE
chr1	120643923	120644262	chr1	120643092	120645093	element_2	Active Enhancer	Repressed	bound_1h	TRUE	FALSE	unbound	FALSE	FALSE
chr1	191986831	191987103	chr1	191985967	191987968	element_20	Repressed	Repressed	bound_1h	TRUE	FALSE	unbound	FALSE	FALSE
chr2	119504239	119504472	chr2	119503355	119505356	element_205	Poised	Repressed	bound_1h	TRUE	FALSE	unbound	FALSE	FALSE
chr1	34103755	34104020	chr1	34102887	34104888	element_21	Active Enhancer	Bivalent	bound_1h	TRUE	FALSE	unbound	FALSE	FALSE
chr2	152349907	152350109	chr2	152349008	152351009	element_212	Active Enhancer	Poised	bound_1h	TRUE	FALSE	unbound	FALSE	FALSE
chr2	157575065	157575347	chr2	157574206	157576207	element_217	Repressed	Repressed	bound_1h	TRUE	FALSE	unbound	FALSE	FALSE
chr2	166157287	166157543	chr2	166156415	166158416	element_218	Active Enhancer	Poised	bound_1h	TRUE	FALSE	unbound	FALSE	FALSE
chr2	32153585	32153764	chr2	32152674	32154675	element_228	Active Promoter	Bivalent	bound_1h	TRUE	FALSE	unbound	FALSE	FALSE
chr2	71714324	71714721	chr2	71713522	71715523	element_230	Poised	Repressed	bound_1h_6h	TRUE	TRUE	unbound	FALSE	FALSE
chr2	96314969	96315192	chr2	96314080	96316081	element_236	Bivalent	Repressed	bound_1h	TRUE	FALSE	unbound	FALSE	FALSE
chr3	101073415	101073621	chr3	101072518	101074519	element_237	Poised	Bivalent	bound_1h	TRUE	FALSE	unbound	FALSE	FALSE
chr3	115858634	115859025	chr3	115857829	115859830	element_241	Poised	Poised	bound_1h	TRUE	FALSE	unbound	FALSE	FALSE
chr3	116598062	116598349	chr3	116597205	116599206	element_243	Poised	Repressed	bound_1h_6h	TRUE	TRUE	unbound	FALSE	FALSE
chr3	149219891	149220207	chr3	149219049	149221050	element_247	Active Enhancer	Poised	bound_1h	TRUE	FALSE	unbound	FALSE	FALSE
chr3	27142410	27142730	chr3	27141570	27143571	element_250	Poised	Repressed	bound_1h	TRUE	FALSE	unbound	FALSE	FALSE
chr3	63641521	63641734	chr3	63640627	63642628	element_253	Poised	Repressed	bound_1h	TRUE	FALSE	unbound	FALSE	FALSE
chr3	68492547	68492789	chr3	68491668	68493669	element_254	Active Promoter	Active Enhancer	bound_1h	TRUE	FALSE	unbound	FALSE	FALSE
chr3	88294919	88295631	chr3	88294275	88296276	element_255	Active Enhancer	Bivalent	bound_1h_6h	TRUE	TRUE	unbound	FALSE	FALSE
chr4	11044748	11045092	chr4	11043920	11045921	element_259	Active Enhancer	Poised	bound_1h	TRUE	FALSE	unbound	FALSE	FALSE
chr4	118639130	118639361	chr4	118638245	118640246	element_260	Repressed	Repressed	bound_1h	TRUE	FALSE	unbound	FALSE	FALSE
chr4	124646527	124646972	chr4	124645749	124647750	element_262	Poised	Poised	bound_1h_6h	TRUE	TRUE	unbound	FALSE	FALSE
chr4	129556567	129556801	chr4	129555684	129557685	element_264	Active Promoter	Active Enhancer	bound_1h	TRUE	FALSE	unbound	FALSE	FALSE
chr4	130519936	130520389	chr4	130519162	130521163	element_265	Active Promoter	Active Enhancer	bound_1h	TRUE	FALSE	unbound	FALSE	FALSE
chr4	13421631	13421863	chr4	13420747	13422748	element_267	Bivalent	Bivalent	bound_1h	TRUE	FALSE	unbound	FALSE	FALSE
chr4	135312879	135313163	chr4	135312021	135314022	element_268	Active Enhancer	Active Enhancer	bound_1h	TRUE	FALSE	unbound	FALSE	FALSE
chr1	52119259	52119585	chr1	52118422	52120423	element_27	Active Enhancer	Active Enhancer	bound_1h	TRUE	FALSE	unbound	FALSE	FALSE
chr4	142070846	142071126	chr4	142069986	142071987	element_270	Active Enhancer	Bivalent	bound_1h	TRUE	FALSE	unbound	FALSE	FALSE
chr4	142171472	142171737	chr4	142170604	142172605	element_271	Active Enhancer	Active Enhancer	bound_1h	TRUE	FALSE	unbound	FALSE	FALSE
chr4	40233176	40233446	chr4	40232311	40234312	element_275	Active Enhancer	Repressed	bound_1h	TRUE	FALSE	unbound	FALSE	FALSE
chr4	99675356	99675586	chr4	99674471	99676472	element_282	Active Enhancer	Repressed	bound_1h	TRUE	FALSE	unbound	FALSE	FALSE
chr5	110082889	110083303	chr5	110082096	110084097	element_289	Bivalent	Repressed	bound_1h_6h	TRUE	TRUE	unbound	FALSE	FALSE
chr5	120887521	120887795	chr5	120886658	120888659	element_294	Active Enhancer	Repressed	bound_1h	TRUE	FALSE	unbound	FALSE	FALSE
chr5	122762184	122762393	chr5	122761288	122763289	element_297	Poised	Repressed	bound_1h	TRUE	FALSE	unbound	FALSE	FALSE
chr5	135962295	135962680	chr5	135961487	135963488	element_298	Active Promoter	Active Enhancer	bound_1h	TRUE	FALSE	unbound	FALSE	FALSE
chr1	12744627	12745064	chr1	12743845	12745846	element_3	Active Enhancer	Bivalent	bound_1h	TRUE	FALSE	unbound	FALSE	FALSE
chr5	53505803	53506017	chr5	53504910	53506911	element_301	Active Enhancer	Repressed	bound_1h	TRUE	FALSE	unbound	FALSE	FALSE
chr6	121241828	121242001	chr6	121240914	121242915	element_313	Repressed	Repressed	bound_6h	FALSE	TRUE	unbound	FALSE	FALSE
chr6	122770218	122770712	chr6	122769465	122771466	element_315	Active Enhancer	Poised	bound_1h	TRUE	FALSE	unbound	FALSE	FALSE
chr6	144454484	144454745	chr6	144453614	144455615	element_320	Active Enhancer	Repressed	bound_1h	TRUE	FALSE	unbound	FALSE	FALSE
chr6	149335929	149336271	chr6	149335100	149337101	element_321	Poised	Repressed	bound_1h_6h	TRUE	TRUE	unbound	FALSE	FALSE
chr6	53799056	53799483	chr6	53798269	53800270	element_330	Poised	Repressed	bound_1h_6h	TRUE	TRUE	unbound	FALSE	FALSE
chr6	66864529	66864778	chr6	66863653	66865654	element_331	Repressed	Repressed	bound_1h	TRUE	FALSE	unbound	FALSE	FALSE
chr6	67170316	67170654	chr6	67169485	67171486	element_333	Poised	Bivalent	bound_1h_6h	TRUE	TRUE	unbound	FALSE	FALSE
chr6	95239001	95239230	chr6	95238115	95240116	element_335	Repressed	Repressed	bound_1h	TRUE	FALSE	unbound	FALSE	FALSE
chr7	102565306	102565617	chr7	102564461	102566462	element_336	Active Enhancer	Active Enhancer	bound_1h	TRUE	FALSE	unbound	FALSE	FALSE
chr10	11801750	11801965	chr10	11800857	11802858	element_34	Bivalent	Repressed	bound_1h	TRUE	FALSE	unbound	FALSE	FALSE
chr7	112691426	112691761	chr7	112690593	112692594	element_343	Active Enhancer	Poised	bound_1h	TRUE	FALSE	unbound	FALSE	FALSE
chr7	3206528	3206879	chr7	3205703	3207704	element_352	Active Promoter	Repressed	bound_1h	TRUE	FALSE	unbound	FALSE	FALSE
chr7	81151118	81151623	chr7	81150370	81152371	element_356	Active Promoter	Repressed	bound_1h_6h	TRUE	TRUE	unbound	FALSE	FALSE
chr7	96204907	96205089	chr7	96203998	96205999	element_357	Active Enhancer	Repressed	bound_1h	TRUE	FALSE	unbound	FALSE	FALSE
chr10	21826972	21827169	chr10	21826070	21828071	element_36	Active Enhancer	Poised	bound_1h	TRUE	FALSE	unbound	FALSE	FALSE
chr8	65067873	65068288	chr8	65067080	65069081	element_363	Bivalent	Repressed	bound_1h_6h	TRUE	TRUE	unbound	FALSE	FALSE
chr8	72189490	72189843	chr8	72188666	72190667	element_365	Poised	Poised	bound_1h	TRUE	FALSE	unbound	FALSE	FALSE
chr8	75089552	75089740	chr8	75088646	75090647	element_366	Active Enhancer	Active Enhancer	bound_1h	TRUE	FALSE	unbound	FALSE	FALSE
chr8	84650240	84650587	chr8	84649413	84651414	element_368	Active Enhancer	Poised	bound_1h	TRUE	FALSE	unbound	FALSE	FALSE
chr8	90001865	90002152	chr8	90001008	90003009	element_369	Repressed	Repressed	bound_1h	TRUE	FALSE	unbound	FALSE	FALSE
chr10	4249313	4249595	chr10	4248454	4250455	element_37	Active Enhancer	Poised	bound_1h	TRUE	FALSE	unbound	FALSE	FALSE
chr9	108035394	108035868	chr9	108034631	108036632	element_371	Poised	Poised	bound_1h	TRUE	FALSE	unbound	FALSE	FALSE
chr9	124273074	124273396	chr9	124272235	124274236	element_375	Repressed	Repressed	bound_1h_6h	TRUE	TRUE	unbound	FALSE	FALSE
chr9	20835643	20835989	chr9	20834816	20836817	element_376	Poised	Repressed	bound_1h_6h	TRUE	TRUE	unbound	FALSE	FALSE
chr9	27313423	27313790	chr9	27312606	27314607	element_379	Poised	Poised	bound_1h	TRUE	FALSE	unbound	FALSE	FALSE
chr10	43559697	43559957	chr10	43558827	43560828	element_38	Poised	Repressed	bound_1h	TRUE	FALSE	unbound	FALSE	FALSE
chr9	57780669	57781061	chr9	57779865	57781866	element_382	Repressed	Repressed	bound_1h_6h	TRUE	TRUE	unbound	FALSE	FALSE
chr9	70477386	70477669	chr9	70476527	70478528	element_384	Active Enhancer	Repressed	bound_1h	TRUE	FALSE	unbound	FALSE	FALSE
chr9	95499405	95499624	chr9	95498514	95500515	element_386	Poised	Repressed	bound_1h	TRUE	FALSE	unbound	FALSE	FALSE
chr9	95954783	95954996	chr9	95953889	95955890	element_387	Active Promoter	Active Promoter	bound_1h	TRUE	FALSE	unbound	FALSE	FALSE
chr9	99420402	99420585	chr9	99419493	99421494	element_388	Active Enhancer	Poised	bound_1h	TRUE	FALSE	unbound	FALSE	FALSE
chrX	117316771	117317076	chrX	117315923	117317924	element_389	Bivalent	Repressed	bound_1h	TRUE	FALSE	unbound	FALSE	FALSE
chrX	164407362	164407619	chrX	164406490	164408491	element_391	Poised	Repressed	bound_1h	TRUE	FALSE	unbound	FALSE	FALSE
chrX	36772650	36772850	chrX	36771750	36773751	element_392	Bivalent	Repressed	bound_1h	TRUE	FALSE	unbound	FALSE	FALSE
chr10	74919455	74919732	chr10	74918593	74920594	element_41	Poised	Repressed	bound_1h	TRUE	FALSE	unbound	FALSE	FALSE
chr10	77572406	77572676	chr10	77571541	77573542	element_42	Active Enhancer	Repressed	bound_1h	TRUE	FALSE	unbound	FALSE	FALSE
chr10	88513490	88513894	chr10	88512692	88514693	element_44	Poised	Poised	bound_1h_6h	TRUE	TRUE	unbound	FALSE	FALSE
chr10	99353536	99353792	chr10	99352664	99354665	element_45	Active Enhancer	Bivalent	bound_1h	TRUE	FALSE	unbound	FALSE	FALSE
chr11	117975463	117975930	chr11	117974696	117976697	element_50	Active Enhancer	Active Enhancer	bound_1h	TRUE	FALSE	unbound	FALSE	FALSE
chr11	11905028	11905369	chr11	11904198	11906199	element_53	Active Enhancer	Repressed	bound_1h	TRUE	FALSE	unbound	FALSE	FALSE
chr11	27213355	27213568	chr11	27212461	27214462	element_58	Bivalent	Repressed	bound_1h	TRUE	FALSE	unbound	FALSE	FALSE
chr1	150496679	150497031	chr1	150495855	150497856	element_7	Bivalent	Poised	bound_1h	TRUE	FALSE	unbound	FALSE	FALSE
chr11	58211471	58211755	chr11	58210613	58212614	element_74	Poised	Poised	bound_1h	TRUE	FALSE	unbound	FALSE	FALSE
chr11	79002240	79002963	chr11	79001601	79003602	element_78	Active Enhancer	Poised	bound_1h_6h	TRUE	TRUE	unbound	FALSE	FALSE
chr11	8569507	8569693	chr11	8568600	8570601	element_86	Active Enhancer	Active Enhancer	bound_1h	TRUE	FALSE	unbound	FALSE	FALSE
chr11	9117074	9117343	chr11	9116208	9118209	element_88	Active Promoter	Poised	bound_1h	TRUE	FALSE	unbound	FALSE	FALSE
chr12	110471262	110471644	chr12	110470453	110472454	element_91	Active Enhancer	Poised	bound_1h	TRUE	FALSE	unbound	FALSE	FALSE
chr12	12943173	12943679	chr12	12942426	12944427	element_92	Active Promoter	Poised	bound_1h	TRUE	FALSE	unbound	FALSE	FALSE
chr12	21462572	21463138	chr12	21461855	21463856	element_93	Active Enhancer	Poised	bound_1h	TRUE	FALSE	unbound	FALSE	FALSE

## Sheet: ISG_TSS_w_STAT_ESC
ISG Promoter Region							Bound by STAT				STAT1 peak			STAT1/2 peak					STAT2 peak
chr	start	end	strand	ENSEMBLE Gene ID	ENSEMBLE Transcript ID	Gene Symbole	STAT1 bound	STAT1/2 bound	STAT2 bound	Not bound	chr	start	end	chr	start	end	element_ID	cluster_name	chr	start	end
chr1	52119072	52120073	1	ENSMUSG00000026104	ENSMUST00000185743	Stat1	FALSE	TRUE	FALSE	FALSE	.	0	0	chr1	52119259	52119585	element_27	Active Enhancer	.	0	0
chr1	52118998	52119999	1	ENSMUSG00000026104	ENSMUST00000188681	Stat1	FALSE	TRUE	FALSE	FALSE	.	0	0	chr1	52119259	52119585	element_27	Active Enhancer	.	0	0
chr1	52149758	52150759	1	ENSMUSG00000026104	ENSMUST00000189244	Stat1	FALSE	FALSE	FALSE	TRUE	.	0	0	.	0	0	.	.	.	0	0
chr1	52118940	52119941	1	ENSMUSG00000026104	ENSMUST00000186574	Stat1	FALSE	TRUE	FALSE	FALSE	.	0	0	chr1	52119259	52119585	element_27	Active Enhancer	.	0	0
chr1	52118990	52119991	1	ENSMUSG00000026104	ENSMUST00000191435	Stat1	FALSE	TRUE	FALSE	FALSE	.	0	0	chr1	52119259	52119585	element_27	Active Enhancer	.	0	0
chr1	52149604	52150605	1	ENSMUSG00000026104	ENSMUST00000189075	Stat1	FALSE	FALSE	FALSE	TRUE	.	0	0	.	0	0	.	.	.	0	0
chr1	52119059	52120060	1	ENSMUSG00000026104	ENSMUST00000186186	Stat1	FALSE	TRUE	FALSE	FALSE	.	0	0	chr1	52119259	52119585	element_27	Active Enhancer	.	0	0
chr1	52119124	52120125	1	ENSMUSG00000026104	ENSMUST00000186057	Stat1	FALSE	TRUE	FALSE	FALSE	.	0	0	chr1	52119259	52119585	element_27	Active Enhancer	.	0	0
chr1	52119049	52120050	1	ENSMUSG00000026104	ENSMUST00000189347	Stat1	FALSE	TRUE	FALSE	FALSE	.	0	0	chr1	52119259	52119585	element_27	Active Enhancer	.	0	0
chr1	52118992	52119993	1	ENSMUSG00000026104	ENSMUST00000186857	Stat1	FALSE	TRUE	FALSE	FALSE	.	0	0	chr1	52119259	52119585	element_27	Active Enhancer	.	0	0
chr1	52118955	52119956	1	ENSMUSG00000026104	ENSMUST00000070968	Stat1	FALSE	TRUE	FALSE	FALSE	.	0	0	chr1	52119259	52119585	element_27	Active Enhancer	.	0	0
chr1	52151753	52152754	1	ENSMUSG00000026104	ENSMUST00000189336	Stat1	FALSE	FALSE	FALSE	TRUE	.	0	0	.	0	0	.	.	.	0	0
chr1	103363486	103364487	1	ENSMUSG00000099469	ENSMUST00000190357	Gm29141	FALSE	FALSE	FALSE	TRUE	.	0	0	.	0	0	.	.	.	0	0
chr1	156040390	156041391	1	ENSMUSG00000050565	ENSMUST00000131359	Tor1aip2	FALSE	FALSE	FALSE	TRUE	.	0	0	.	0	0	.	.	.	0	0
chr1	156035226	156036227	1	ENSMUSG00000050565	ENSMUST00000111754	Tor1aip2	FALSE	FALSE	FALSE	TRUE	.	0	0	.	0	0	.	.	.	0	0
chr1	156040417	156041418	1	ENSMUSG00000050565	ENSMUST00000065648	Tor1aip2	FALSE	FALSE	FALSE	TRUE	.	0	0	.	0	0	.	.	.	0	0
chr1	156062713	156063714	1	ENSMUSG00000050565	ENSMUST00000125371	Tor1aip2	FALSE	FALSE	FALSE	TRUE	.	0	0	.	0	0	.	.	.	0	0
chr1	156040390	156041391	1	ENSMUSG00000050565	ENSMUST00000060404	Tor1aip2	FALSE	FALSE	FALSE	TRUE	.	0	0	.	0	0	.	.	.	0	0
chr1	156034903	156035904	1	ENSMUSG00000050565	ENSMUST00000111757	Tor1aip2	FALSE	FALSE	FALSE	TRUE	.	0	0	.	0	0	.	.	.	0	0
chr1	156040417	156041418	1	ENSMUSG00000050565	ENSMUST00000097526	Tor1aip2	FALSE	FALSE	FALSE	TRUE	.	0	0	.	0	0	.	.	.	0	0
chr1	156035272	156036273	1	ENSMUSG00000050565	ENSMUST00000133152	Tor1aip2	FALSE	FALSE	FALSE	TRUE	.	0	0	.	0	0	.	.	.	0	0
chr1	156035633	156036634	1	ENSMUSG00000050565	ENSMUST00000128941	Tor1aip2	FALSE	FALSE	FALSE	TRUE	.	0	0	.	0	0	.	.	.	0	0
chr1	180329985	180330986	1	ENSMUSG00000038855	ENSMUST00000070181	Itpkb	FALSE	FALSE	FALSE	TRUE	.	0	0	.	0	0	.	.	.	0	0
chr1	180333366	180334367	1	ENSMUSG00000038855	ENSMUST00000195043	Itpkb	FALSE	FALSE	FALSE	TRUE	.	0	0	.	0	0	.	.	.	0	0
chr1	85649508	85650509	1	ENSMUSG00000026222	ENSMUST00000145440	Sp100	FALSE	FALSE	FALSE	TRUE	.	0	0	.	0	0	.	.	.	0	0
chr1	85649488	85650489	1	ENSMUSG00000026222	ENSMUST00000141998	Sp100	FALSE	FALSE	FALSE	TRUE	.	0	0	.	0	0	.	.	.	0	0
chr1	85649514	85650515	1	ENSMUSG00000026222	ENSMUST00000147552	Sp100	FALSE	FALSE	FALSE	TRUE	.	0	0	.	0	0	.	.	.	0	0
chr1	85649514	85650515	1	ENSMUSG00000026222	ENSMUST00000054279	Sp100	FALSE	FALSE	FALSE	TRUE	.	0	0	.	0	0	.	.	.	0	0
chr1	85649488	85650489	1	ENSMUSG00000026222	ENSMUST00000155094	Sp100	FALSE	FALSE	FALSE	TRUE	.	0	0	.	0	0	.	.	.	0	0
chr1	85649515	85650516	1	ENSMUSG00000026222	ENSMUST00000150967	Sp100	FALSE	FALSE	FALSE	TRUE	.	0	0	.	0	0	.	.	.	0	0
chr1	85649514	85650515	1	ENSMUSG00000026222	ENSMUST00000153574	Sp100	FALSE	FALSE	FALSE	TRUE	.	0	0	.	0	0	.	.	.	0	0
chr1	85693797	85694798	1	ENSMUSG00000026222	ENSMUST00000132641	Sp100	FALSE	FALSE	FALSE	TRUE	.	0	0	.	0	0	.	.	.	0	0
chr1	85673217	85674218	1	ENSMUSG00000026222	ENSMUST00000140758	Sp100	FALSE	FALSE	FALSE	TRUE	.	0	0	.	0	0	.	.	.	0	0
chr1	85671325	85672326	1	ENSMUSG00000026222	ENSMUST00000129951	Sp100	FALSE	FALSE	FALSE	TRUE	.	0	0	.	0	0	.	.	.	0	0
chr1	85702942	85703943	1	ENSMUSG00000026222	ENSMUST00000141709	Sp100	FALSE	FALSE	FALSE	TRUE	.	0	0	.	0	0	.	.	.	0	0
chr1	85649550	85650551	1	ENSMUSG00000026222	ENSMUST00000066427	Sp100	FALSE	FALSE	FALSE	TRUE	.	0	0	.	0	0	.	.	.	0	0
chr1	85693439	85694440	1	ENSMUSG00000026222	ENSMUST00000134283	Sp100	FALSE	FALSE	FALSE	TRUE	.	0	0	.	0	0	.	.	.	0	0
chr1	173982243	173983244	-1	ENSMUSG00000026535	ENSMUST00000000266	Ifi202b	FALSE	FALSE	FALSE	TRUE	.	0	0	.	0	0	.	.	.	0	0
chr1	156018118	156019119	-1	ENSMUSG00000026466	ENSMUST00000124212	Tor1aip1	FALSE	FALSE	FALSE	TRUE	.	0	0	.	0	0	.	.	.	0	0
chr1	156032452	156033453	-1	ENSMUSG00000026466	ENSMUST00000136397	Tor1aip1	FALSE	FALSE	FALSE	TRUE	.	0	0	.	0	0	.	.	.	0	0
chr1	156034316	156035317	-1	ENSMUSG00000026466	ENSMUST00000169241	Tor1aip1	FALSE	FALSE	FALSE	TRUE	.	0	0	.	0	0	.	.	.	0	0
chr1	156035979	156036980	-1	ENSMUSG00000026466	ENSMUST00000130995	Tor1aip1	FALSE	FALSE	FALSE	TRUE	.	0	0	.	0	0	.	.	.	0	0
chr1	156035979	156036980	-1	ENSMUSG00000026466	ENSMUST00000136331	Tor1aip1	FALSE	FALSE	FALSE	TRUE	.	0	0	.	0	0	.	.	.	0	0
chr1	156035549	156036550	-1	ENSMUSG00000026466	ENSMUST00000123705	Tor1aip1	FALSE	FALSE	FALSE	TRUE	.	0	0	.	0	0	.	.	.	0	0
chr1	156034379	156035380	-1	ENSMUSG00000026466	ENSMUST00000141878	Tor1aip1	FALSE	FALSE	FALSE	TRUE	.	0	0	.	0	0	.	.	.	0	0
chr1	156035926	156036927	-1	ENSMUSG00000026466	ENSMUST00000097527	Tor1aip1	FALSE	FALSE	FALSE	TRUE	.	0	0	.	0	0	.	.	.	0	0
chr1	156035646	156036647	-1	ENSMUSG00000026466	ENSMUST00000141980	Tor1aip1	FALSE	FALSE	FALSE	TRUE	.	0	0	.	0	0	.	.	.	0	0
chr1	156035979	156036980	-1	ENSMUSG00000026466	ENSMUST00000027738	Tor1aip1	FALSE	FALSE	FALSE	TRUE	.	0	0	.	0	0	.	.	.	0	0
chr1	156673834	156674835	-1	ENSMUSG00000060519	ENSMUST00000190607	Tor3a	FALSE	TRUE	FALSE	FALSE	.	0	0	chr1	156674301	156674686	element_11	Active Enhancer	.	0	0
chr1	156673855	156674856	-1	ENSMUSG00000060519	ENSMUST00000079625	Tor3a	FALSE	TRUE	FALSE	FALSE	.	0	0	chr1	156674301	156674686	element_11	Active Enhancer	.	0	0
chr1	156673813	156674814	-1	ENSMUSG00000060519	ENSMUST00000122242	Tor3a	FALSE	TRUE	FALSE	FALSE	.	0	0	chr1	156674301	156674686	element_11	Active Enhancer	.	0	0
chr1	156673824	156674825	-1	ENSMUSG00000060519	ENSMUST00000156861	Tor3a	FALSE	TRUE	FALSE	FALSE	.	0	0	chr1	156674301	156674686	element_11	Active Enhancer	.	0	0
chr1	156666229	156667230	-1	ENSMUSG00000060519	ENSMUST00000152604	Tor3a	FALSE	FALSE	FALSE	TRUE	.	0	0	.	0	0	.	.	.	0	0
chr1	156673813	156674814	-1	ENSMUSG00000060519	ENSMUST00000188964	Tor3a	FALSE	TRUE	FALSE	FALSE	.	0	0	chr1	156674301	156674686	element_11	Active Enhancer	.	0	0
chr1	156657957	156658958	-1	ENSMUSG00000060519	ENSMUST00000154353	Tor3a	FALSE	FALSE	FALSE	TRUE	.	0	0	.	0	0	.	.	.	0	0
chr1	156673855	156674856	-1	ENSMUSG00000060519	ENSMUST00000150557	Tor3a	FALSE	TRUE	FALSE	FALSE	.	0	0	chr1	156674301	156674686	element_11	Active Enhancer	.	0	0
chr1	85326784	85327785	-1	ENSMUSG00000091199	ENSMUST00000162276	Gm2619	FALSE	FALSE	FALSE	TRUE	.	0	0	.	0	0	.	.	.	0	0
chr1	85326805	85327806	-1	ENSMUSG00000091199	ENSMUST00000166777	Gm2619	FALSE	FALSE	FALSE	TRUE	.	0	0	.	0	0	.	.	.	0	0
chr1	37881367	37882368	-1	ENSMUSG00000026088	ENSMUST00000127170	Mitd1	FALSE	FALSE	FALSE	TRUE	.	0	0	.	0	0	.	.	.	0	0
chr1	37889906	37890907	-1	ENSMUSG00000026088	ENSMUST00000139725	Mitd1	FALSE	TRUE	FALSE	FALSE	.	0	0	chr1	37889927	37890544	element_23	Active Promoter	.	0	0
chr1	37889910	37890911	-1	ENSMUSG00000026088	ENSMUST00000027257	Mitd1	FALSE	TRUE	FALSE	FALSE	.	0	0	chr1	37889927	37890544	element_23	Active Promoter	.	0	0
chr1	37879617	37880618	-1	ENSMUSG00000026088	ENSMUST00000131754	Mitd1	FALSE	FALSE	FALSE	TRUE	.	0	0	.	0	0	.	.	.	0	0
chr1	37889775	37890776	-1	ENSMUSG00000026088	ENSMUST00000138806	Mitd1	FALSE	TRUE	FALSE	FALSE	.	0	0	chr1	37889927	37890544	element_23	Active Promoter	.	0	0
chr10	128268171	128269172	1	ENSMUSG00000047631	ENSMUST00000050901	Apof	FALSE	FALSE	FALSE	TRUE	.	0	0	.	0	0	.	.	.	0	0
chr10	128282317	128283318	1	ENSMUSG00000040033	ENSMUST00000217727	Stat2	FALSE	FALSE	FALSE	TRUE	.	0	0	.	0	0	.	.	.	0	0
chr10	128283607	128284608	1	ENSMUSG00000040033	ENSMUST00000220277	Stat2	FALSE	FALSE	FALSE	TRUE	.	0	0	.	0	0	.	.	.	0	0
chr10	128283070	128284071	1	ENSMUSG00000040033	ENSMUST00000218862	Stat2	FALSE	FALSE	FALSE	TRUE	.	0	0	.	0	0	.	.	.	0	0
chr10	128277358	128278359	1	ENSMUSG00000040033	ENSMUST00000217852	Stat2	FALSE	FALSE	FALSE	TRUE	.	0	0	.	0	0	.	.	.	0	0
chr10	128270076	128271077	1	ENSMUSG00000040033	ENSMUST00000085708	Stat2	FALSE	TRUE	FALSE	FALSE	.	0	0	chr10	128270049	128270496	element_35	Active Promoter	.	0	0
chr10	128270076	128271077	1	ENSMUSG00000040033	ENSMUST00000105238	Stat2	FALSE	TRUE	FALSE	FALSE	.	0	0	chr10	128270049	128270496	element_35	Active Promoter	.	0	0
chr10	128281148	128282149	1	ENSMUSG00000040033	ENSMUST00000220142	Stat2	FALSE	FALSE	FALSE	TRUE	.	0	0	.	0	0	.	.	.	0	0
chr10	128270059	128271060	1	ENSMUSG00000040033	ENSMUST00000218863	Stat2	FALSE	TRUE	FALSE	FALSE	.	0	0	chr10	128270049	128270496	element_35	Active Promoter	.	0	0
chr10	50641942	50642943	1	ENSMUSG00000038774	ENSMUST00000217968	Ascc3	FALSE	FALSE	FALSE	TRUE	.	0	0	.	0	0	.	.	.	0	0
chr10	50763296	50764297	1	ENSMUSG00000038774	ENSMUST00000217725	Ascc3	FALSE	FALSE	FALSE	TRUE	.	0	0	.	0	0	.	.	.	0	0
chr10	50604251	50605252	1	ENSMUSG00000038774	ENSMUST00000219226	Ascc3	FALSE	FALSE	FALSE	TRUE	.	0	0	.	0	0	.	.	.	0	0
chr10	50648555	50649556	1	ENSMUSG00000038774	ENSMUST00000220026	Ascc3	FALSE	FALSE	FALSE	TRUE	.	0	0	.	0	0	.	.	.	0	0
chr10	50728458	50729459	1	ENSMUSG00000038774	ENSMUST00000219085	Ascc3	FALSE	FALSE	FALSE	TRUE	.	0	0	.	0	0	.	.	.	0	0
chr10	50592169	50593170	1	ENSMUSG00000038774	ENSMUST00000035606	Ascc3	FALSE	TRUE	FALSE	FALSE	.	0	0	chr10	50592084	50592644	element_39	Active Promoter	.	0	0
chr10	50604272	50605273	1	ENSMUSG00000038774	ENSMUST00000220178	Ascc3	FALSE	FALSE	FALSE	TRUE	.	0	0	.	0	0	.	.	.	0	0
chr10	50753341	50754342	1	ENSMUSG00000038774	ENSMUST00000219172	Ascc3	FALSE	FALSE	FALSE	TRUE	.	0	0	.	0	0	.	.	.	0	0
chr10	50596316	50597317	1	ENSMUSG00000038774	ENSMUST00000220355	Ascc3	FALSE	FALSE	FALSE	TRUE	.	0	0	.	0	0	.	.	.	0	0
chr10	30655282	30656283	-1	ENSMUSG00000039697	ENSMUST00000092610	Ncoa7	TRUE	FALSE	FALSE	FALSE	chr10	30655772	30656026	.	0	0	.	.	.	0	0
chr10	30802606	30803607	-1	ENSMUSG00000039697	ENSMUST00000068567	Ncoa7	FALSE	FALSE	FALSE	TRUE	.	0	0	.	0	0	.	.	.	0	0
chr10	30655366	30656367	-1	ENSMUSG00000039697	ENSMUST00000216172	Ncoa7	TRUE	FALSE	FALSE	FALSE	chr10	30655772	30656026	.	0	0	.	.	.	0	0
chr10	30771440	30772441	-1	ENSMUSG00000039697	ENSMUST00000215740	Ncoa7	FALSE	FALSE	FALSE	TRUE	.	0	0	.	0	0	.	.	.	0	0
chr10	30802825	30803826	-1	ENSMUSG00000039697	ENSMUST00000215725	Ncoa7	FALSE	FALSE	FALSE	TRUE	.	0	0	.	0	0	.	.	.	0	0
chr10	30655336	30656337	-1	ENSMUSG00000039697	ENSMUST00000217644	Ncoa7	TRUE	FALSE	FALSE	FALSE	chr10	30655772	30656026	.	0	0	.	.	.	0	0
chr10	30771341	30772342	-1	ENSMUSG00000039697	ENSMUST00000213836	Ncoa7	FALSE	FALSE	FALSE	TRUE	.	0	0	.	0	0	.	.	.	0	0
chr10	30655266	30656267	-1	ENSMUSG00000039697	ENSMUST00000213889	Ncoa7	TRUE	FALSE	FALSE	FALSE	chr10	30655772	30656026	.	0	0	.	.	.	0	0
chr10	30771339	30772340	-1	ENSMUSG00000039697	ENSMUST00000215926	Ncoa7	FALSE	FALSE	FALSE	TRUE	.	0	0	.	0	0	.	.	.	0	0
chr10	30722204	30723205	-1	ENSMUSG00000039697	ENSMUST00000217398	Ncoa7	FALSE	FALSE	FALSE	TRUE	.	0	0	.	0	0	.	.	.	0	0
chr10	30655335	30656336	-1	ENSMUSG00000039697	ENSMUST00000217138	Ncoa7	TRUE	FALSE	FALSE	FALSE	chr10	30655772	30656026	.	0	0	.	.	.	0	0
chr10	30655290	30656291	-1	ENSMUSG00000039697	ENSMUST00000213897	Ncoa7	TRUE	FALSE	FALSE	FALSE	chr10	30655772	30656026	.	0	0	.	.	.	0	0
chr11	83174694	83175695	1	ENSMUSG00000000204	ENSMUST00000167596	Slfn4	FALSE	FALSE	FALSE	TRUE	.	0	0	.	0	0	.	.	.	0	0
chr11	83176103	83177104	1	ENSMUSG00000000204	ENSMUST00000215472	Slfn4	FALSE	FALSE	FALSE	TRUE	.	0	0	.	0	0	.	.	.	0	0
chr11	83174686	83175687	1	ENSMUSG00000000204	ENSMUST00000000208	Slfn4	FALSE	FALSE	FALSE	TRUE	.	0	0	.	0	0	.	.	.	0	0
chr11	72301163	72302164	1	ENSMUSG00000040483	ENSMUST00000094041	Xaf1	FALSE	TRUE	FALSE	FALSE	.	0	0	chr11	72301391	72301992	element_76	Active Enhancer	.	0	0
chr11	72301130	72302131	1	ENSMUSG00000040483	ENSMUST00000146233	Xaf1	FALSE	TRUE	FALSE	FALSE	.	0	0	chr11	72301391	72301992	element_76	Active Enhancer	.	0	0
chr11	72301129	72302130	1	ENSMUSG00000040483	ENSMUST00000151440	Xaf1	FALSE	TRUE	FALSE	FALSE	.	0	0	chr11	72301391	72301992	element_76	Active Enhancer	.	0	0
chr11	72301139	72302140	1	ENSMUSG00000040483	ENSMUST00000140842	Xaf1	FALSE	TRUE	FALSE	FALSE	.	0	0	chr11	72301391	72301992	element_76	Active Enhancer	.	0	0
chr11	72301165	72302166	1	ENSMUSG00000040483	ENSMUST00000142921	Xaf1	FALSE	TRUE	FALSE	FALSE	.	0	0	chr11	72301391	72301992	element_76	Active Enhancer	.	0	0
chr11	58187239	58188240	1	ENSMUSG00000082292	ENSMUST00000119467	Gm12250	FALSE	FALSE	FALSE	TRUE	.	0	0	.	0	0	.	.	.	0	0
chr11	58199118	58200119	1	ENSMUSG00000069874	ENSMUST00000058704	Irgm2	FALSE	TRUE	FALSE	FALSE	.	0	0	chr11	58199358	58199627	element_73	Poised	.	0	0
chr11	58214508	58215509	1	ENSMUSG00000069874	ENSMUST00000209079	Irgm2	FALSE	TRUE	FALSE	FALSE	.	0	0	chr11	58214694	58215002	element_75	Poised	.	0	0
chr11	58214528	58215529	1	ENSMUSG00000069874	ENSMUST00000108836	Irgm2	FALSE	TRUE	FALSE	FALSE	.	0	0	chr11	58214694	58215002	element_75	Poised	.	0	0
chr11	58199086	58200087	1	ENSMUSG00000078853	ENSMUST00000094169	Igtp	FALSE	TRUE	FALSE	FALSE	.	0	0	chr11	58199358	58199627	element_73	Poised	.	0	0
chr11	58199056	58200057	1	ENSMUSG00000078853	ENSMUST00000035266	Igtp	FALSE	TRUE	FALSE	FALSE	.	0	0	chr11	58199358	58199627	element_73	Poised	.	0	0
chr11	58199088	58200089	1	ENSMUSG00000078853	ENSMUST00000168280	Igtp	FALSE	TRUE	FALSE	FALSE	.	0	0	chr11	58199358	58199627	element_73	Poised	.	0	0
chr11	29130248	29131249	1	ENSMUSG00000020464	ENSMUST00000148173	Pnpt1	FALSE	TRUE	FALSE	FALSE	.	0	0	chr11	29130411	29130878	element_59	Active Promoter	.	0	0
chr11	29137687	29138688	1	ENSMUSG00000020464	ENSMUST00000131527	Pnpt1	FALSE	FALSE	FALSE	TRUE	.	0	0	.	0	0	.	.	.	0	0
chr11	29130244	29131245	1	ENSMUSG00000020464	ENSMUST00000154924	Pnpt1	FALSE	TRUE	FALSE	FALSE	.	0	0	chr11	29130411	29130878	element_59	Active Promoter	.	0	0
chr11	29130248	29131249	1	ENSMUSG00000020464	ENSMUST00000020756	Pnpt1	FALSE	TRUE	FALSE	FALSE	.	0	0	chr11	29130411	29130878	element_59	Active Promoter	.	0	0
chr11	119477557	119478558	1	ENSMUSG00000070327	ENSMUST00000172235	Rnf213	FALSE	FALSE	FALSE	TRUE	.	0	0	.	0	0	.	.	.	0	0
chr11	119392600	119393601	1	ENSMUSG00000070327	ENSMUST00000131035	Rnf213	FALSE	TRUE	FALSE	FALSE	.	0	0	chr11	119392768	119393228	element_54	Active Enhancer	.	0	0
chr11	119392600	119393601	1	ENSMUSG00000070327	ENSMUST00000093902	Rnf213	FALSE	TRUE	FALSE	FALSE	.	0	0	chr11	119392768	119393228	element_54	Active Enhancer	.	0	0
chr11	82954161	82955162	1	ENSMUSG00000054404	ENSMUST00000108157	Slfn5	FALSE	FALSE	FALSE	TRUE	.	0	0	.	0	0	.	.	.	0	0
chr11	82951595	82952596	1	ENSMUSG00000054404	ENSMUST00000108158	Slfn5	FALSE	FALSE	FALSE	TRUE	.	0	0	.	0	0	.	.	.	0	0
chr11	82950849	82951850	1	ENSMUSG00000054404	ENSMUST00000150687	Slfn5	FALSE	FALSE	FALSE	TRUE	.	0	0	.	0	0	.	.	.	0	0
chr11	82951602	82952603	1	ENSMUSG00000054404	ENSMUST00000067443	Slfn5	FALSE	FALSE	FALSE	TRUE	.	0	0	.	0	0	.	.	.	0	0
chr11	49086200	49087201	1	ENSMUSG00000078920	ENSMUST00000152914	Ifi47	FALSE	FALSE	FALSE	TRUE	.	0	0	.	0	0	.	.	.	0	0
chr11	49076087	49077088	1	ENSMUSG00000078920	ENSMUST00000109202	Ifi47	FALSE	FALSE	FALSE	TRUE	.	0	0	.	0	0	.	.	.	0	0
chr11	49086568	49087569	1	ENSMUSG00000078920	ENSMUST00000214804	Ifi47	FALSE	FALSE	FALSE	TRUE	.	0	0	.	0	0	.	.	.	0	0
chr11	49087764	49088765	1	ENSMUSG00000078920	ENSMUST00000213728	Ifi47	FALSE	FALSE	FALSE	TRUE	.	0	0	.	0	0	.	.	.	0	0
chr11	49086539	49087540	1	ENSMUSG00000078920	ENSMUST00000046704	Ifi47	FALSE	FALSE	FALSE	TRUE	.	0	0	.	0	0	.	.	.	0	0
chr11	88998876	88999877	1	ENSMUSG00000000275	ENSMUST00000000284	Trim25	FALSE	TRUE	FALSE	FALSE	.	0	0	chr11	88999207	88999739	element_87	Active Promoter	.	0	0
chr11	88998876	88999877	1	ENSMUSG00000000275	ENSMUST00000107896	Trim25	FALSE	TRUE	FALSE	FALSE	.	0	0	chr11	88999207	88999739	element_87	Active Promoter	.	0	0
chr11	88998876	88999877	1	ENSMUSG00000000275	ENSMUST00000100627	Trim25	FALSE	TRUE	FALSE	FALSE	.	0	0	chr11	88999207	88999739	element_87	Active Promoter	.	0	0
chr11	31999963	32000964	1	ENSMUSG00000020297	ENSMUST00000109409	Nsg2	FALSE	FALSE	FALSE	TRUE	.	0	0	.	0	0	.	.	.	0	0
chr11	32000002	32001003	1	ENSMUSG00000020297	ENSMUST00000093219	Nsg2	FALSE	FALSE	FALSE	TRUE	.	0	0	.	0	0	.	.	.	0	0
chr11	31999963	32000964	1	ENSMUSG00000020297	ENSMUST00000020537	Nsg2	FALSE	FALSE	FALSE	TRUE	.	0	0	.	0	0	.	.	.	0	0
chr11	53769977	53770978	1	ENSMUSG00000018899	ENSMUST00000138913	Irf1	FALSE	TRUE	FALSE	FALSE	.	0	0	chr11	53769754	53770033	element_71	Active Promoter	.	0	0
chr11	53769995	53770996	1	ENSMUSG00000018899	ENSMUST00000019043	Irf1	FALSE	TRUE	FALSE	FALSE	.	0	0	chr11	53769754	53770033	element_71	Active Promoter	.	0	0
chr11	53769605	53770606	1	ENSMUSG00000018899	ENSMUST00000142221	Irf1	FALSE	TRUE	FALSE	FALSE	.	0	0	chr11	53769754	53770033	element_71	Active Promoter	.	0	0
chr11	53769571	53770572	1	ENSMUSG00000018899	ENSMUST00000128336	Irf1	FALSE	TRUE	FALSE	FALSE	.	0	0	chr11	53769754	53770033	element_71	Active Promoter	.	0	0
chr11	53770009	53771010	1	ENSMUSG00000018899	ENSMUST00000133291	Irf1	FALSE	TRUE	FALSE	FALSE	.	0	0	chr11	53769754	53770033	element_71	Active Promoter	.	0	0
chr11	53769551	53770552	1	ENSMUSG00000018899	ENSMUST00000108922	Irf1	FALSE	TRUE	FALSE	FALSE	.	0	0	chr11	53769754	53770033	element_71	Active Promoter	.	0	0
chr11	53772653	53773654	1	ENSMUSG00000018899	ENSMUST00000153054	Irf1	FALSE	FALSE	FALSE	TRUE	.	0	0	.	0	0	.	.	.	0	0
chr11	53769987	53770988	1	ENSMUSG00000018899	ENSMUST00000123376	Irf1	FALSE	TRUE	FALSE	FALSE	.	0	0	chr11	53769754	53770033	element_71	Active Promoter	.	0	0
chr11	53769548	53770549	1	ENSMUSG00000018899	ENSMUST00000140866	Irf1	FALSE	TRUE	FALSE	FALSE	.	0	0	chr11	53769754	53770033	element_71	Active Promoter	.	0	0
chr11	53769514	53770515	1	ENSMUSG00000018899	ENSMUST00000108920	Irf1	FALSE	TRUE	FALSE	FALSE	.	0	0	chr11	53769754	53770033	element_71	Active Promoter	.	0	0
chr11	101447907	101448908	1	ENSMUSG00000010358	ENSMUST00000010502	Ifi35	FALSE	FALSE	TRUE	FALSE	.	0	0	.	0	0	.	.	chr11	101448352	101448574
chr11	101448070	101449071	1	ENSMUSG00000010358	ENSMUST00000131024	Ifi35	FALSE	FALSE	TRUE	FALSE	.	0	0	.	0	0	.	.	chr11	101448352	101448574
chr11	101447944	101448945	1	ENSMUSG00000010358	ENSMUST00000125958	Ifi35	FALSE	FALSE	TRUE	FALSE	.	0	0	.	0	0	.	.	chr11	101448352	101448574
chr11	69846117	69847118	1	ENSMUSG00000019461	ENSMUST00000108633	Plscr3	FALSE	FALSE	FALSE	TRUE	.	0	0	.	0	0	.	.	.	0	0
chr11	69846176	69847177	1	ENSMUSG00000019461	ENSMUST00000019605	Plscr3	FALSE	FALSE	FALSE	TRUE	.	0	0	.	0	0	.	.	.	0	0
chr11	69846117	69847118	1	ENSMUSG00000019461	ENSMUST00000152566	Plscr3	FALSE	FALSE	FALSE	TRUE	.	0	0	.	0	0	.	.	.	0	0
chr11	69845876	69846877	1	ENSMUSG00000019461	ENSMUST00000108632	Plscr3	FALSE	FALSE	FALSE	TRUE	.	0	0	.	0	0	.	.	.	0	0
chr11	78969829	78970830	-1	ENSMUSG00000001123	ENSMUST00000140073	Lgals9	FALSE	FALSE	FALSE	TRUE	.	0	0	.	0	0	.	.	.	0	0
chr11	78984423	78985424	-1	ENSMUSG00000001123	ENSMUST00000108269	Lgals9	FALSE	FALSE	FALSE	TRUE	.	0	0	.	0	0	.	.	.	0	0
chr11	78984330	78985331	-1	ENSMUSG00000001123	ENSMUST00000073001	Lgals9	FALSE	FALSE	FALSE	TRUE	.	0	0	.	0	0	.	.	.	0	0
chr11	78984445	78985446	-1	ENSMUSG00000001123	ENSMUST00000108268	Lgals9	FALSE	FALSE	FALSE	TRUE	.	0	0	.	0	0	.	.	.	0	0
chr11	82991328	82992329	-1	ENSMUSG00000069793	ENSMUST00000092840	Slfn9	FALSE	FALSE	FALSE	TRUE	.	0	0	.	0	0	.	.	.	0	0
chr11	82990636	82991637	-1	ENSMUSG00000069793	ENSMUST00000138797	Slfn9	FALSE	FALSE	FALSE	TRUE	.	0	0	.	0	0	.	.	.	0	0
chr11	82991329	82992330	-1	ENSMUSG00000069793	ENSMUST00000038211	Slfn9	FALSE	FALSE	FALSE	TRUE	.	0	0	.	0	0	.	.	.	0	0
chr11	117969546	117970547	-1	ENSMUSG00000053113	ENSMUST00000123255	Socs3	FALSE	FALSE	FALSE	TRUE	.	0	0	.	0	0	.	.	.	0	0
chr11	117968950	117969951	-1	ENSMUSG00000053113	ENSMUST00000132295	Socs3	FALSE	FALSE	FALSE	TRUE	.	0	0	.	0	0	.	.	.	0	0
chr11	117968685	117969686	-1	ENSMUSG00000053113	ENSMUST00000054002	Socs3	FALSE	FALSE	FALSE	TRUE	.	0	0	.	0	0	.	.	.	0	0
chr11	118400537	118401538	-1	ENSMUSG00000033880	ENSMUST00000127054	Lgals3bp	FALSE	FALSE	FALSE	TRUE	.	0	0	.	0	0	.	.	.	0	0
chr11	118401591	118402592	-1	ENSMUSG00000033880	ENSMUST00000043722	Lgals3bp	TRUE	FALSE	FALSE	FALSE	chr11	118401851	118402114	.	0	0	.	.	.	0	0
chr11	118397650	118398651	-1	ENSMUSG00000033880	ENSMUST00000144529	Lgals3bp	FALSE	FALSE	FALSE	TRUE	.	0	0	.	0	0	.	.	.	0	0
chr11	118401351	118402352	-1	ENSMUSG00000033880	ENSMUST00000106290	Lgals3bp	TRUE	FALSE	FALSE	FALSE	chr11	118401851	118402114	.	0	0	.	.	.	0	0
chr11	118401371	118402372	-1	ENSMUSG00000033880	ENSMUST00000141459	Lgals3bp	TRUE	FALSE	FALSE	FALSE	chr11	118401851	118402114	.	0	0	.	.	.	0	0
chr11	100703752	100704753	-1	ENSMUSG00000017830	ENSMUST00000126167	Dhx58	FALSE	FALSE	FALSE	TRUE	.	0	0	.	0	0	.	.	.	0	0
chr11	100702846	100703847	-1	ENSMUSG00000017830	ENSMUST00000150656	Dhx58	FALSE	FALSE	FALSE	TRUE	.	0	0	.	0	0	.	.	.	0	0
chr11	100703770	100704771	-1	ENSMUSG00000017830	ENSMUST00000132930	Dhx58	FALSE	FALSE	FALSE	TRUE	.	0	0	.	0	0	.	.	.	0	0
chr11	100703770	100704771	-1	ENSMUSG00000017830	ENSMUST00000017974	Dhx58	FALSE	FALSE	FALSE	TRUE	.	0	0	.	0	0	.	.	.	0	0
chr11	100696119	100697120	-1	ENSMUSG00000017830	ENSMUST00000140543	Dhx58	FALSE	FALSE	FALSE	TRUE	.	0	0	.	0	0	.	.	.	0	0
chr11	100698734	100699735	-1	ENSMUSG00000017830	ENSMUST00000149869	Dhx58	FALSE	FALSE	FALSE	TRUE	.	0	0	.	0	0	.	.	.	0	0
chr11	48992389	48993390	-1	ENSMUSG00000078922	ENSMUST00000132745	Tgtp1	FALSE	TRUE	FALSE	FALSE	.	0	0	chr11	48992169	48992612	element_64	Poised	.	0	0
chr11	48993671	48994672	-1	ENSMUSG00000078922	ENSMUST00000146439	Tgtp1	TRUE	FALSE	FALSE	FALSE	chr11	48994146	48994490	.	0	0	.	.	.	0	0
chr11	48991757	48992758	-1	ENSMUSG00000078922	ENSMUST00000068063	Tgtp1	FALSE	TRUE	FALSE	FALSE	.	0	0	chr11	48992169	48992612	element_64	Poised	.	0	0
chr11	49063703	49064704	-1	ENSMUSG00000078921	ENSMUST00000046745	Tgtp2	FALSE	FALSE	TRUE	FALSE	.	0	0	.	0	0	.	.	chr11	49064170	49064462
chr11	49063705	49064706	-1	ENSMUSG00000078921	ENSMUST00000128411	Tgtp2	FALSE	FALSE	TRUE	FALSE	.	0	0	.	0	0	.	.	chr11	49064170	49064462
chr11	48871182	48872183	-1	ENSMUSG00000046879	ENSMUST00000147151	Irgm1	FALSE	TRUE	FALSE	FALSE	.	0	0	chr11	48871114	48871830	element_62	Bivalent	.	0	0
chr11	48870873	48871874	-1	ENSMUSG00000046879	ENSMUST00000049519	Irgm1	FALSE	TRUE	FALSE	FALSE	.	0	0	chr11	48871114	48871830	element_62	Bivalent	.	0	0
chr11	48870919	48871920	-1	ENSMUSG00000046879	ENSMUST00000097271	Irgm1	FALSE	TRUE	FALSE	FALSE	.	0	0	chr11	48871114	48871830	element_62	Bivalent	.	0	0
chr12	103433711	103434712	1	ENSMUSG00000064215	ENSMUST00000079294	Ifi27	FALSE	TRUE	FALSE	FALSE	.	0	0	chr12	103433685	103434569	element_90	Repressed	.	0	0
chr12	103433711	103434712	1	ENSMUSG00000064215	ENSMUST00000076788	Ifi27	FALSE	TRUE	FALSE	FALSE	.	0	0	chr12	103433685	103434569	element_90	Repressed	.	0	0
chr12	103433785	103434786	1	ENSMUSG00000064215	ENSMUST00000148824	Ifi27	FALSE	TRUE	FALSE	FALSE	.	0	0	chr12	103433685	103434569	element_90	Repressed	.	0	0
chr12	103433792	103434793	1	ENSMUSG00000064215	ENSMUST00000140838	Ifi27	FALSE	TRUE	FALSE	FALSE	.	0	0	chr12	103433685	103434569	element_90	Repressed	.	0	0
chr12	103433745	103434746	1	ENSMUSG00000064215	ENSMUST00000122905	Ifi27	FALSE	TRUE	FALSE	FALSE	.	0	0	chr12	103433685	103434569	element_90	Repressed	.	0	0
chr12	103433711	103434712	1	ENSMUSG00000064215	ENSMUST00000076702	Ifi27	FALSE	TRUE	FALSE	FALSE	.	0	0	chr12	103433685	103434569	element_90	Repressed	.	0	0
chr12	103433759	103434760	1	ENSMUSG00000064215	ENSMUST00000085065	Ifi27	FALSE	TRUE	FALSE	FALSE	.	0	0	chr12	103433685	103434569	element_90	Repressed	.	0	0
chr12	103437127	103438128	1	ENSMUSG00000064215	ENSMUST00000153670	Ifi27	FALSE	FALSE	FALSE	TRUE	.	0	0	.	0	0	.	.	.	0	0
chr12	103433712	103434713	1	ENSMUSG00000064215	ENSMUST00000066701	Ifi27	FALSE	TRUE	FALSE	FALSE	.	0	0	chr12	103433685	103434569	element_90	Repressed	.	0	0
chr12	26468704	26469705	1	ENSMUSG00000020638	ENSMUST00000020969	Cmpk2	FALSE	TRUE	FALSE	FALSE	.	0	0	chr12	26469090	26469451	element_95	Active Enhancer	.	0	0
chr12	26473430	26474431	1	ENSMUSG00000020638	ENSMUST00000221060	Cmpk2	FALSE	FALSE	FALSE	TRUE	.	0	0	.	0	0	.	.	.	0	0
chr12	26470245	26471246	1	ENSMUSG00000020638	ENSMUST00000220466	Cmpk2	FALSE	FALSE	FALSE	TRUE	.	0	0	.	0	0	.	.	.	0	0
chr12	26470009	26471010	1	ENSMUSG00000020638	ENSMUST00000221826	Cmpk2	FALSE	FALSE	FALSE	TRUE	.	0	0	.	0	0	.	.	.	0	0
chr12	103425283	103426284	-1	ENSMUSG00000041645	ENSMUST00000223233	Ddx24	FALSE	FALSE	FALSE	TRUE	.	0	0	.	0	0	.	.	.	0	0
chr12	103425323	103426324	-1	ENSMUSG00000041645	ENSMUST00000221211	Ddx24	FALSE	FALSE	FALSE	TRUE	.	0	0	.	0	0	.	.	.	0	0
chr12	103416834	103417835	-1	ENSMUSG00000041645	ENSMUST00000222782	Ddx24	FALSE	FALSE	FALSE	TRUE	.	0	0	.	0	0	.	.	.	0	0
chr12	103425279	103426280	-1	ENSMUSG00000041645	ENSMUST00000110001	Ddx24	FALSE	FALSE	FALSE	TRUE	.	0	0	.	0	0	.	.	.	0	0
chr12	103410411	103411412	-1	ENSMUSG00000041645	ENSMUST00000222715	Ddx24	FALSE	FALSE	FALSE	TRUE	.	0	0	.	0	0	.	.	.	0	0
chr12	103425329	103426330	-1	ENSMUSG00000041645	ENSMUST00000220705	Ddx24	FALSE	FALSE	FALSE	TRUE	.	0	0	.	0	0	.	.	.	0	0
chr12	103410932	103411933	-1	ENSMUSG00000041645	ENSMUST00000220481	Ddx24	FALSE	FALSE	FALSE	TRUE	.	0	0	.	0	0	.	.	.	0	0
chr12	103425281	103426282	-1	ENSMUSG00000041645	ENSMUST00000220975	Ddx24	FALSE	FALSE	FALSE	TRUE	.	0	0	.	0	0	.	.	.	0	0
chr12	103425318	103426319	-1	ENSMUSG00000041645	ENSMUST00000044923	Ddx24	FALSE	FALSE	FALSE	TRUE	.	0	0	.	0	0	.	.	.	0	0
chr12	26455930	26456931	-1	ENSMUSG00000020641	ENSMUST00000137792	Rsad2	FALSE	FALSE	FALSE	TRUE	.	0	0	.	0	0	.	.	.	0	0
chr12	26454341	26455342	-1	ENSMUSG00000020641	ENSMUST00000142732	Rsad2	FALSE	FALSE	FALSE	TRUE	.	0	0	.	0	0	.	.	.	0	0
chr12	26455951	26456952	-1	ENSMUSG00000020641	ENSMUST00000020970	Rsad2	FALSE	FALSE	FALSE	TRUE	.	0	0	.	0	0	.	.	.	0	0
chr13	74639373	74640374	1	ENSMUSG00000021583	ENSMUST00000221526	Erap1	FALSE	FALSE	FALSE	TRUE	.	0	0	.	0	0	.	.	.	0	0
chr13	74639068	74640069	1	ENSMUSG00000021583	ENSMUST00000169114	Erap1	FALSE	FALSE	FALSE	TRUE	.	0	0	.	0	0	.	.	.	0	0
chr13	74639353	74640354	1	ENSMUSG00000021583	ENSMUST00000220594	Erap1	FALSE	FALSE	FALSE	TRUE	.	0	0	.	0	0	.	.	.	0	0
chr13	74639355	74640356	1	ENSMUSG00000021583	ENSMUST00000221822	Erap1	FALSE	FALSE	FALSE	TRUE	.	0	0	.	0	0	.	.	.	0	0
chr13	74662967	74663968	1	ENSMUSG00000021583	ENSMUST00000221606	Erap1	FALSE	FALSE	FALSE	TRUE	.	0	0	.	0	0	.	.	.	0	0
chr13	74665599	74666600	1	ENSMUSG00000021583	ENSMUST00000222127	Erap1	FALSE	FALSE	FALSE	TRUE	.	0	0	.	0	0	.	.	.	0	0
chr13	12461005	12462006	-1	ENSMUSG00000057554	ENSMUST00000135166	Lgals8	FALSE	FALSE	FALSE	TRUE	.	0	0	.	0	0	.	.	.	0	0
chr13	12460546	12461547	-1	ENSMUSG00000057554	ENSMUST00000152478	Lgals8	FALSE	FALSE	FALSE	TRUE	.	0	0	.	0	0	.	.	.	0	0
chr13	12461237	12462238	-1	ENSMUSG00000057554	ENSMUST00000099821	Lgals8	FALSE	FALSE	FALSE	TRUE	.	0	0	.	0	0	.	.	.	0	0
chr13	12456022	12457023	-1	ENSMUSG00000057554	ENSMUST00000155871	Lgals8	FALSE	FALSE	FALSE	TRUE	.	0	0	.	0	0	.	.	.	0	0
chr13	12461002	12462003	-1	ENSMUSG00000057554	ENSMUST00000099820	Lgals8	FALSE	FALSE	FALSE	TRUE	.	0	0	.	0	0	.	.	.	0	0
chr13	12460992	12461993	-1	ENSMUSG00000057554	ENSMUST00000143693	Lgals8	FALSE	FALSE	FALSE	TRUE	.	0	0	.	0	0	.	.	.	0	0
chr13	12464443	12465444	-1	ENSMUSG00000057554	ENSMUST00000124888	Lgals8	FALSE	FALSE	FALSE	TRUE	.	0	0	.	0	0	.	.	.	0	0
chr13	12454513	12455514	-1	ENSMUSG00000057554	ENSMUST00000135060	Lgals8	FALSE	FALSE	FALSE	TRUE	.	0	0	.	0	0	.	.	.	0	0
chr13	12448235	12449236	-1	ENSMUSG00000057554	ENSMUST00000133143	Lgals8	FALSE	FALSE	FALSE	TRUE	.	0	0	.	0	0	.	.	.	0	0
chr13	12460994	12461995	-1	ENSMUSG00000057554	ENSMUST00000144283	Lgals8	FALSE	FALSE	FALSE	TRUE	.	0	0	.	0	0	.	.	.	0	0
chr14	79515186	79516187	1	ENSMUSG00000036461	ENSMUST00000227192	Elf1	FALSE	FALSE	FALSE	TRUE	.	0	0	.	0	0	.	.	.	0	0
chr14	79515198	79516199	1	ENSMUSG00000036461	ENSMUST00000227104	Elf1	FALSE	FALSE	FALSE	TRUE	.	0	0	.	0	0	.	.	.	0	0
chr14	79480694	79481695	1	ENSMUSG00000036461	ENSMUST00000040131	Elf1	FALSE	FALSE	FALSE	TRUE	.	0	0	.	0	0	.	.	.	0	0
chr14	79515174	79516175	1	ENSMUSG00000036461	ENSMUST00000110835	Elf1	FALSE	FALSE	FALSE	TRUE	.	0	0	.	0	0	.	.	.	0	0
chr14	77903739	77904740	1	ENSMUSG00000022014	ENSMUST00000022591	Epsti1	FALSE	TRUE	FALSE	FALSE	.	0	0	chr14	77904166	77904518	element_118	Repressed	.	0	0
chr14	77903907	77904908	1	ENSMUSG00000022014	ENSMUST00000227903	Epsti1	FALSE	TRUE	FALSE	FALSE	.	0	0	chr14	77904166	77904518	element_118	Repressed	.	0	0
chr14	77903907	77904908	1	ENSMUSG00000022014	ENSMUST00000169978	Epsti1	FALSE	TRUE	FALSE	FALSE	.	0	0	chr14	77904166	77904518	element_118	Repressed	.	0	0
chr14	55603071	55604072	1	ENSMUSG00000002325	ENSMUST00000134863	Irf9	FALSE	TRUE	FALSE	FALSE	.	0	0	chr14	55603810	55604546	element_115	Active Enhancer	.	0	0
chr14	55606775	55607776	1	ENSMUSG00000002325	ENSMUST00000126269	Irf9	FALSE	FALSE	FALSE	TRUE	.	0	0	.	0	0	.	.	.	0	0
chr14	55607318	55608319	1	ENSMUSG00000002325	ENSMUST00000226275	Irf9	FALSE	FALSE	FALSE	TRUE	.	0	0	.	0	0	.	.	.	0	0
chr14	55605320	55606321	1	ENSMUSG00000002325	ENSMUST00000145680	Irf9	FALSE	FALSE	FALSE	TRUE	.	0	0	.	0	0	.	.	.	0	0
chr14	55604077	55605078	1	ENSMUSG00000002325	ENSMUST00000136109	Irf9	FALSE	TRUE	FALSE	FALSE	.	0	0	chr14	55603810	55604546	element_115	Active Enhancer	.	0	0
chr14	55603485	55604486	1	ENSMUSG00000002325	ENSMUST00000130697	Irf9	FALSE	TRUE	FALSE	FALSE	.	0	0	chr14	55603810	55604546	element_115	Active Enhancer	.	0	0
chr14	55604079	55605080	1	ENSMUSG00000002325	ENSMUST00000138037	Irf9	FALSE	TRUE	FALSE	FALSE	.	0	0	chr14	55603810	55604546	element_115	Active Enhancer	.	0	0
chr14	55578075	55579076	1	ENSMUSG00000022216	ENSMUST00000089619	Psme1	FALSE	FALSE	FALSE	TRUE	.	0	0	.	0	0	.	.	.	0	0
chr14	55577905	55578906	1	ENSMUSG00000022216	ENSMUST00000172941	Psme1	FALSE	FALSE	FALSE	TRUE	.	0	0	.	0	0	.	.	.	0	0
chr14	55578075	55579076	1	ENSMUSG00000022216	ENSMUST00000172738	Psme1	FALSE	FALSE	FALSE	TRUE	.	0	0	.	0	0	.	.	.	0	0
chr14	55578038	55579039	1	ENSMUSG00000022216	ENSMUST00000174563	Psme1	FALSE	FALSE	FALSE	TRUE	.	0	0	.	0	0	.	.	.	0	0
chr14	55577623	55578624	1	ENSMUSG00000022216	ENSMUST00000174484	Psme1	FALSE	FALSE	FALSE	TRUE	.	0	0	.	0	0	.	.	.	0	0
chr14	55577986	55578987	1	ENSMUSG00000022216	ENSMUST00000173388	Psme1	FALSE	FALSE	FALSE	TRUE	.	0	0	.	0	0	.	.	.	0	0
chr14	55577975	55578976	1	ENSMUSG00000022216	ENSMUST00000228834	Psme1	FALSE	FALSE	FALSE	TRUE	.	0	0	.	0	0	.	.	.	0	0
chr14	55580248	55581249	1	ENSMUSG00000022216	ENSMUST00000174419	Psme1	FALSE	FALSE	FALSE	TRUE	.	0	0	.	0	0	.	.	.	0	0
chr14	55577968	55578969	1	ENSMUSG00000022216	ENSMUST00000174791	Psme1	FALSE	FALSE	FALSE	TRUE	.	0	0	.	0	0	.	.	.	0	0
chr14	55577956	55578957	1	ENSMUSG00000022216	ENSMUST00000173544	Psme1	FALSE	FALSE	FALSE	TRUE	.	0	0	.	0	0	.	.	.	0	0
chr14	55579534	55580535	1	ENSMUSG00000022216	ENSMUST00000173113	Psme1	FALSE	FALSE	FALSE	TRUE	.	0	0	.	0	0	.	.	.	0	0
chr14	55579464	55580465	1	ENSMUSG00000022216	ENSMUST00000174148	Psme1	FALSE	FALSE	FALSE	TRUE	.	0	0	.	0	0	.	.	.	0	0
chr14	55577860	55578861	1	ENSMUSG00000022216	ENSMUST00000174259	Psme1	FALSE	FALSE	FALSE	TRUE	.	0	0	.	0	0	.	.	.	0	0
chr14	59394880	59395881	-1	ENSMUSG00000091144	ENSMUST00000166912	Phf11c	FALSE	FALSE	FALSE	TRUE	.	0	0	.	0	0	.	.	.	0	0
chr14	47161371	47162372	-1	ENSMUSG00000037580	ENSMUST00000227883	Gch1	FALSE	FALSE	FALSE	TRUE	.	0	0	.	0	0	.	.	.	0	0
chr14	47188912	47189913	-1	ENSMUSG00000037580	ENSMUST00000089959	Gch1	FALSE	FALSE	FALSE	TRUE	.	0	0	.	0	0	.	.	.	0	0
chr14	55588103	55589104	-1	ENSMUSG00000079197	ENSMUST00000161573	Psme2	FALSE	FALSE	FALSE	TRUE	.	0	0	.	0	0	.	.	.	0	0
chr14	55590612	55591613	-1	ENSMUSG00000079197	ENSMUST00000159687	Psme2	FALSE	FALSE	FALSE	TRUE	.	0	0	.	0	0	.	.	.	0	0
chr14	55590586	55591587	-1	ENSMUSG00000079197	ENSMUST00000161807	Psme2	FALSE	FALSE	FALSE	TRUE	.	0	0	.	0	0	.	.	.	0	0
chr14	55589010	55590011	-1	ENSMUSG00000079197	ENSMUST00000162700	Psme2	FALSE	FALSE	FALSE	TRUE	.	0	0	.	0	0	.	.	.	0	0
chr14	55590600	55591601	-1	ENSMUSG00000079197	ENSMUST00000111378	Psme2	FALSE	FALSE	FALSE	TRUE	.	0	0	.	0	0	.	.	.	0	0
chr14	55590447	55591448	-1	ENSMUSG00000079197	ENSMUST00000159845	Psme2	FALSE	FALSE	FALSE	TRUE	.	0	0	.	0	0	.	.	.	0	0
chr14	55590472	55591473	-1	ENSMUSG00000079197	ENSMUST00000162496	Psme2	FALSE	FALSE	FALSE	TRUE	.	0	0	.	0	0	.	.	.	0	0
chr14	55590363	55591364	-1	ENSMUSG00000079197	ENSMUST00000159282	Psme2	FALSE	FALSE	FALSE	TRUE	.	0	0	.	0	0	.	.	.	0	0
chr14	55590394	55591395	-1	ENSMUSG00000079197	ENSMUST00000159297	Psme2	FALSE	FALSE	FALSE	TRUE	.	0	0	.	0	0	.	.	.	0	0
chr14	55589648	55590649	-1	ENSMUSG00000079197	ENSMUST00000161027	Psme2	FALSE	FALSE	FALSE	TRUE	.	0	0	.	0	0	.	.	.	0	0
chr15	77728648	77729649	1	ENSMUSG00000068246	ENSMUST00000230742	Apol9b	FALSE	FALSE	FALSE	TRUE	.	0	0	.	0	0	.	.	.	0	0
chr15	77728539	77729540	1	ENSMUSG00000068246	ENSMUST00000230979	Apol9b	FALSE	FALSE	FALSE	TRUE	.	0	0	.	0	0	.	.	.	0	0
chr15	77728594	77729595	1	ENSMUSG00000068246	ENSMUST00000109775	Apol9b	FALSE	FALSE	FALSE	TRUE	.	0	0	.	0	0	.	.	.	0	0
chr15	77733104	77734105	1	ENSMUSG00000068246	ENSMUST00000230377	Apol9b	FALSE	FALSE	FALSE	TRUE	.	0	0	.	0	0	.	.	.	0	0
chr15	74954551	74955552	1	ENSMUSG00000022587	ENSMUST00000169343	Ly6e	FALSE	FALSE	FALSE	TRUE	.	0	0	.	0	0	.	.	.	0	0
chr15	74954664	74955665	1	ENSMUSG00000022587	ENSMUST00000187284	Ly6e	FALSE	FALSE	FALSE	TRUE	.	0	0	.	0	0	.	.	.	0	0
chr15	74954741	74955742	1	ENSMUSG00000022587	ENSMUST00000185863	Ly6e	FALSE	FALSE	FALSE	TRUE	.	0	0	.	0	0	.	.	.	0	0
chr15	74954571	74955572	1	ENSMUSG00000022587	ENSMUST00000051698	Ly6e	FALSE	FALSE	FALSE	TRUE	.	0	0	.	0	0	.	.	.	0	0
chr15	74954606	74955607	1	ENSMUSG00000022587	ENSMUST00000187606	Ly6e	FALSE	FALSE	FALSE	TRUE	.	0	0	.	0	0	.	.	.	0	0
chr15	74956055	74957056	1	ENSMUSG00000022587	ENSMUST00000188042	Ly6e	FALSE	FALSE	FALSE	TRUE	.	0	0	.	0	0	.	.	.	0	0
chr15	74955183	74956184	1	ENSMUSG00000022587	ENSMUST00000191439	Ly6e	FALSE	FALSE	FALSE	TRUE	.	0	0	.	0	0	.	.	.	0	0
chr15	74955166	74956167	1	ENSMUSG00000022587	ENSMUST00000186927	Ly6e	FALSE	FALSE	FALSE	TRUE	.	0	0	.	0	0	.	.	.	0	0
chr15	74954760	74955761	1	ENSMUSG00000022587	ENSMUST00000191127	Ly6e	FALSE	FALSE	FALSE	TRUE	.	0	0	.	0	0	.	.	.	0	0
chr15	74955153	74956154	1	ENSMUSG00000022587	ENSMUST00000191436	Ly6e	FALSE	FALSE	FALSE	TRUE	.	0	0	.	0	0	.	.	.	0	0
chr15	74954678	74955679	1	ENSMUSG00000022587	ENSMUST00000190810	Ly6e	FALSE	FALSE	FALSE	TRUE	.	0	0	.	0	0	.	.	.	0	0
chr15	74955168	74956169	1	ENSMUSG00000022587	ENSMUST00000188503	Ly6e	FALSE	FALSE	FALSE	TRUE	.	0	0	.	0	0	.	.	.	0	0
chr15	74954686	74955687	1	ENSMUSG00000022587	ENSMUST00000185861	Ly6e	FALSE	FALSE	FALSE	TRUE	.	0	0	.	0	0	.	.	.	0	0
chr15	74954551	74955552	1	ENSMUSG00000022587	ENSMUST00000188866	Ly6e	FALSE	FALSE	FALSE	TRUE	.	0	0	.	0	0	.	.	.	0	0
chr15	74955172	74956173	1	ENSMUSG00000022587	ENSMUST00000191145	Ly6e	FALSE	FALSE	FALSE	TRUE	.	0	0	.	0	0	.	.	.	0	0
chr15	74954642	74955643	1	ENSMUSG00000022587	ENSMUST00000189186	Ly6e	FALSE	FALSE	FALSE	TRUE	.	0	0	.	0	0	.	.	.	0	0
chr15	76247564	76248565	1	ENSMUSG00000022564	ENSMUST00000229916	Grina	FALSE	FALSE	FALSE	TRUE	.	0	0	.	0	0	.	.	.	0	0
chr15	76246270	76247271	1	ENSMUSG00000022564	ENSMUST00000230347	Grina	FALSE	FALSE	FALSE	TRUE	.	0	0	.	0	0	.	.	.	0	0
chr15	76246275	76247276	1	ENSMUSG00000022564	ENSMUST00000023225	Grina	FALSE	FALSE	FALSE	TRUE	.	0	0	.	0	0	.	.	.	0	0
chr15	76246264	76247265	1	ENSMUSG00000022564	ENSMUST00000229772	Grina	FALSE	FALSE	FALSE	TRUE	.	0	0	.	0	0	.	.	.	0	0
chr15	76246330	76247331	1	ENSMUSG00000022564	ENSMUST00000229380	Grina	FALSE	FALSE	FALSE	TRUE	.	0	0	.	0	0	.	.	.	0	0
chr15	79369492	79370493	-1	ENSMUSG00000009035	ENSMUST00000226929	Tmem184b	FALSE	FALSE	FALSE	TRUE	.	0	0	.	0	0	.	.	.	0	0
chr15	79396355	79397356	-1	ENSMUSG00000009035	ENSMUST00000228472	Tmem184b	FALSE	FALSE	FALSE	TRUE	.	0	0	.	0	0	.	.	.	0	0
chr15	79403068	79404069	-1	ENSMUSG00000009035	ENSMUST00000074991	Tmem184b	FALSE	TRUE	FALSE	FALSE	.	0	0	chr15	79403277	79403818	element_133	Active Promoter	.	0	0
chr15	79402738	79403739	-1	ENSMUSG00000009035	ENSMUST00000231076	Tmem184b	FALSE	TRUE	FALSE	FALSE	.	0	0	chr15	79403277	79403818	element_133	Active Promoter	.	0	0
chr15	79402755	79403756	-1	ENSMUSG00000009035	ENSMUST00000228002	Tmem184b	FALSE	TRUE	FALSE	FALSE	.	0	0	chr15	79403277	79403818	element_133	Active Promoter	.	0	0
chr15	79402474	79403475	-1	ENSMUSG00000009035	ENSMUST00000229049	Tmem184b	FALSE	TRUE	FALSE	FALSE	.	0	0	chr15	79403277	79403818	element_133	Active Promoter	.	0	0
chr15	79402418	79403419	-1	ENSMUSG00000009035	ENSMUST00000178522	Tmem184b	FALSE	TRUE	FALSE	FALSE	.	0	0	chr15	79403277	79403818	element_133	Active Promoter	.	0	0
chr15	79402775	79403776	-1	ENSMUSG00000009035	ENSMUST00000229003	Tmem184b	FALSE	TRUE	FALSE	FALSE	.	0	0	chr15	79403277	79403818	element_133	Active Promoter	.	0	0
chr15	77410634	77411635	-1	ENSMUSG00000057346	ENSMUST00000081776	Apol9a	FALSE	FALSE	FALSE	TRUE	.	0	0	.	0	0	.	.	.	0	0
chr15	77410533	77411534	-1	ENSMUSG00000057346	ENSMUST00000089452	Apol9a	FALSE	FALSE	FALSE	TRUE	.	0	0	.	0	0	.	.	.	0	0
chr15	77410526	77411527	-1	ENSMUSG00000057346	ENSMUST00000229175	Apol9a	FALSE	FALSE	FALSE	TRUE	.	0	0	.	0	0	.	.	.	0	0
chr15	77406064	77407065	-1	ENSMUSG00000057346	ENSMUST00000231161	Apol9a	FALSE	FALSE	FALSE	TRUE	.	0	0	.	0	0	.	.	.	0	0
chr15	76233222	76234223	-1	ENSMUSG00000063268	ENSMUST00000170226	Parp10	FALSE	FALSE	FALSE	TRUE	.	0	0	.	0	0	.	.	.	0	0
chr15	76242933	76243934	-1	ENSMUSG00000063268	ENSMUST00000166151	Parp10	FALSE	TRUE	FALSE	FALSE	.	0	0	chr15	76243190	76243572	element_129	Poised	.	0	0
chr15	76233752	76234753	-1	ENSMUSG00000063268	ENSMUST00000169255	Parp10	FALSE	FALSE	FALSE	TRUE	.	0	0	.	0	0	.	.	.	0	0
chr15	76242919	76243920	-1	ENSMUSG00000063268	ENSMUST00000165738	Parp10	FALSE	TRUE	FALSE	FALSE	.	0	0	chr15	76243190	76243572	element_129	Poised	.	0	0
chr15	76233972	76234973	-1	ENSMUSG00000063268	ENSMUST00000170851	Parp10	FALSE	FALSE	FALSE	TRUE	.	0	0	.	0	0	.	.	.	0	0
chr15	76242940	76243941	-1	ENSMUSG00000063268	ENSMUST00000075689	Parp10	FALSE	TRUE	FALSE	FALSE	.	0	0	chr15	76243190	76243572	element_129	Poised	.	0	0
chr15	74997530	74998531	-1	ENSMUSG00000075602	ENSMUST00000187994	Ly6a	FALSE	FALSE	FALSE	TRUE	.	0	0	.	0	0	.	.	.	0	0
chr15	74997133	74998134	-1	ENSMUSG00000075602	ENSMUST00000023248	Ly6a	FALSE	FALSE	FALSE	TRUE	.	0	0	.	0	0	.	.	.	0	0
chr15	74997406	74998407	-1	ENSMUSG00000075602	ENSMUST00000189068	Ly6a	FALSE	FALSE	FALSE	TRUE	.	0	0	.	0	0	.	.	.	0	0
chr15	74997486	74998487	-1	ENSMUSG00000075602	ENSMUST00000187171	Ly6a	FALSE	FALSE	FALSE	TRUE	.	0	0	.	0	0	.	.	.	0	0
chr15	74997427	74998428	-1	ENSMUSG00000075602	ENSMUST00000186526	Ly6a	FALSE	FALSE	FALSE	TRUE	.	0	0	.	0	0	.	.	.	0	0
chr15	74997334	74998335	-1	ENSMUSG00000075602	ENSMUST00000190188	Ly6a	FALSE	FALSE	FALSE	TRUE	.	0	0	.	0	0	.	.	.	0	0
chr16	97549887	97550888	1	ENSMUSG00000023341	ENSMUST00000190097	Mx2	FALSE	FALSE	FALSE	TRUE	.	0	0	.	0	0	.	.	.	0	0
chr16	97535581	97536582	1	ENSMUSG00000023341	ENSMUST00000188251	Mx2	FALSE	TRUE	FALSE	FALSE	.	0	0	chr16	97535785	97536163	element_153	Poised	.	0	0
chr16	97534808	97535809	1	ENSMUSG00000023341	ENSMUST00000190447	Mx2	FALSE	TRUE	FALSE	FALSE	.	0	0	chr16	97534620	97535385	element_153	Poised	.	0	0
chr16	97534808	97535809	1	ENSMUSG00000023341	ENSMUST00000190447	Mx2	FALSE	TRUE	FALSE	FALSE	.	0	0	chr16	97535785	97536163	element_154	Poised
chr16	97557912	97558913	1	ENSMUSG00000023341	ENSMUST00000191103	Mx2	FALSE	FALSE	FALSE	TRUE	.	0	0	.	0	0	.	.	.	0	0
chr16	97535583	97536584	1	ENSMUSG00000023341	ENSMUST00000024112	Mx2	FALSE	TRUE	FALSE	FALSE	.	0	0	chr16	97535785	97536163	element_153	Poised	.	0	0
chr16	77081002	77082003	1	ENSMUSG00000022867	ENSMUST00000232538	Usp25	FALSE	FALSE	FALSE	TRUE	.	0	0	.	0	0	.	.	.	0	0
chr16	77013206	77014207	1	ENSMUSG00000022867	ENSMUST00000023580	Usp25	FALSE	FALSE	FALSE	TRUE	.	0	0	.	0	0	.	.	.	0	0
chr16	77083400	77084401	1	ENSMUSG00000022867	ENSMUST00000232351	Usp25	FALSE	FALSE	FALSE	TRUE	.	0	0	.	0	0	.	.	.	0	0
chr16	77013287	77014288	1	ENSMUSG00000022867	ENSMUST00000232047	Usp25	FALSE	FALSE	FALSE	TRUE	.	0	0	.	0	0	.	.	.	0	0
chr16	35940533	35941534	1	ENSMUSG00000022906	ENSMUST00000153066	Parp9	FALSE	FALSE	FALSE	TRUE	.	0	0	.	0	0	.	.	.	0	0
chr16	35937970	35938971	1	ENSMUSG00000022906	ENSMUST00000114878	Parp9	FALSE	TRUE	FALSE	FALSE	.	0	0	chr16	35938711	35939211	element_145	Active Enhancer	.	0	0
chr16	35938530	35939531	1	ENSMUSG00000022906	ENSMUST00000128878	Parp9	FALSE	TRUE	FALSE	FALSE	.	0	0	chr16	35938711	35939211	element_145	Active Enhancer	.	0	0
chr16	35938512	35939513	1	ENSMUSG00000022906	ENSMUST00000114877	Parp9	FALSE	TRUE	FALSE	FALSE	.	0	0	chr16	35938711	35939211	element_145	Active Enhancer	.	0	0
chr16	35947784	35948785	1	ENSMUSG00000022906	ENSMUST00000159160	Parp9	FALSE	FALSE	FALSE	TRUE	.	0	0	.	0	0	.	.	.	0	0
chr16	35938561	35939562	1	ENSMUSG00000022906	ENSMUST00000122870	Parp9	FALSE	TRUE	FALSE	FALSE	.	0	0	chr16	35938711	35939211	element_145	Active Enhancer	.	0	0
chr16	35938511	35939512	1	ENSMUSG00000022906	ENSMUST00000023622	Parp9	FALSE	TRUE	FALSE	FALSE	.	0	0	chr16	35938711	35939211	element_145	Active Enhancer	.	0	0
chr16	23519791	23520792	1	ENSMUSG00000033355	ENSMUST00000209422	Rtp4	FALSE	FALSE	FALSE	TRUE	.	0	0	.	0	0	.	.	.	0	0
chr16	23601242	23602243	1	ENSMUSG00000033355	ENSMUST00000211569	Rtp4	FALSE	FALSE	FALSE	TRUE	.	0	0	.	0	0	.	.	.	0	0
chr16	23608557	23609558	1	ENSMUSG00000033355	ENSMUST00000210901	Rtp4	FALSE	TRUE	FALSE	FALSE	.	0	0	chr16	23609351	23610256	element_140	Poised	.	0	0
chr16	23609425	23610426	1	ENSMUSG00000033355	ENSMUST00000211349	Rtp4	FALSE	TRUE	FALSE	FALSE	.	0	0	chr16	23609351	23610256	element_140	Poised	.	0	0
chr16	23609419	23610420	1	ENSMUSG00000033355	ENSMUST00000038423	Rtp4	FALSE	TRUE	FALSE	FALSE	.	0	0	chr16	23609351	23610256	element_140	Poised	.	0	0
chr16	97462405	97463406	-1	ENSMUSG00000000386	ENSMUST00000113768	Mx1	FALSE	FALSE	FALSE	TRUE	.	0	0	.	0	0	.	.	.	0	0
chr16	97460271	97461272	-1	ENSMUSG00000000386	ENSMUST00000232282	Mx1	FALSE	FALSE	FALSE	TRUE	.	0	0	.	0	0	.	.	.	0	0
chr16	97452376	97453377	-1	ENSMUSG00000000386	ENSMUST00000231995	Mx1	FALSE	FALSE	FALSE	TRUE	.	0	0	.	0	0	.	.	.	0	0
chr16	97460271	97461272	-1	ENSMUSG00000000386	ENSMUST00000232193	Mx1	FALSE	FALSE	FALSE	TRUE	.	0	0	.	0	0	.	.	.	0	0
chr16	97462405	97463406	-1	ENSMUSG00000000386	ENSMUST00000023655	Mx1	FALSE	FALSE	FALSE	TRUE	.	0	0	.	0	0	.	.	.	0	0
chr16	97462388	97463389	-1	ENSMUSG00000000386	ENSMUST00000231461	Mx1	FALSE	FALSE	FALSE	TRUE	.	0	0	.	0	0	.	.	.	0	0
chr16	97462404	97463405	-1	ENSMUSG00000000386	ENSMUST00000142883	Mx1	FALSE	FALSE	FALSE	TRUE	.	0	0	.	0	0	.	.	.	0	0
chr16	97462406	97463407	-1	ENSMUSG00000000386	ENSMUST00000135184	Mx1	FALSE	FALSE	FALSE	TRUE	.	0	0	.	0	0	.	.	.	0	0
chr16	97460357	97461358	-1	ENSMUSG00000000386	ENSMUST00000231455	Mx1	FALSE	FALSE	FALSE	TRUE	.	0	0	.	0	0	.	.	.	0	0
chr16	97462404	97463405	-1	ENSMUSG00000000386	ENSMUST00000155233	Mx1	FALSE	FALSE	FALSE	TRUE	.	0	0	.	0	0	.	.	.	0	0
chr16	35867450	35868451	-1	ENSMUSG00000116639	ENSMUST00000231830	AC129574.2	FALSE	FALSE	FALSE	TRUE	.	0	0	.	0	0	.	.	.	0	0
chr16	35871043	35872044	-1	ENSMUSG00000034422	ENSMUST00000042665	Parp14	FALSE	FALSE	FALSE	TRUE	.	0	0	.	0	0	.	.	.	0	0
chr16	35870881	35871882	-1	ENSMUSG00000034422	ENSMUST00000142946	Parp14	FALSE	FALSE	FALSE	TRUE	.	0	0	.	0	0	.	.	.	0	0
chr16	35870881	35871882	-1	ENSMUSG00000034422	ENSMUST00000135669	Parp14	FALSE	FALSE	FALSE	TRUE	.	0	0	.	0	0	.	.	.	0	0
chr16	93794400	93795401	-1	ENSMUSG00000097768	ENSMUST00000180967	2310043M15Rik	TRUE	FALSE	FALSE	FALSE	chr16	93794879	93795287	.	0	0	.	.	.	0	0
chr16	35938650	35939651	-1	ENSMUSG00000049502	ENSMUST00000114885	Dtx3l	FALSE	TRUE	FALSE	FALSE	.	0	0	chr16	35938711	35939211	element_145	Active Enhancer	.	0	0
chr16	35938650	35939651	-1	ENSMUSG00000049502	ENSMUST00000081933	Dtx3l	FALSE	TRUE	FALSE	FALSE	.	0	0	chr16	35938711	35939211	element_145	Active Enhancer	.	0	0
chr16	10785035	10786036	-1	ENSMUSG00000038037	ENSMUST00000229866	Socs1	FALSE	TRUE	FALSE	FALSE	.	0	0	chr16	10785434	10785836	element_136	Active Promoter	.	0	0
chr16	10785035	10786036	-1	ENSMUSG00000038037	ENSMUST00000038099	Socs1	FALSE	TRUE	FALSE	FALSE	.	0	0	chr16	10785434	10785836	element_136	Active Promoter	.	0	0
chr17	34198109	34199110	1	ENSMUSG00000024338	ENSMUST00000172960	Psmb8	FALSE	FALSE	FALSE	TRUE	.	0	0	.	0	0	.	.	.	0	0
chr17	34197221	34198222	1	ENSMUSG00000024338	ENSMUST00000173441	Psmb8	FALSE	FALSE	FALSE	TRUE	.	0	0	.	0	0	.	.	.	0	0
chr17	34197290	34198291	1	ENSMUSG00000024338	ENSMUST00000025196	Psmb8	FALSE	FALSE	FALSE	TRUE	.	0	0	.	0	0	.	.	.	0	0
chr17	34203580	34204581	1	ENSMUSG00000024339	ENSMUST00000138491	Tap2	FALSE	FALSE	FALSE	TRUE	.	0	0	.	0	0	.	.	.	0	0
chr17	34204067	34205068	1	ENSMUSG00000024339	ENSMUST00000127543	Tap2	FALSE	FALSE	FALSE	TRUE	.	0	0	.	0	0	.	.	.	0	0
chr17	34207206	34208207	1	ENSMUSG00000024339	ENSMUST00000145528	Tap2	FALSE	FALSE	FALSE	TRUE	.	0	0	.	0	0	.	.	.	0	0
chr17	34203027	34204028	1	ENSMUSG00000024339	ENSMUST00000025197	Tap2	FALSE	FALSE	FALSE	TRUE	.	0	0	.	0	0	.	.	.	0	0
chr17	34204600	34205601	1	ENSMUSG00000024339	ENSMUST00000131105	Tap2	FALSE	FALSE	FALSE	TRUE	.	0	0	.	0	0	.	.	.	0	0
chr17	34187228	34188229	1	ENSMUSG00000037321	ENSMUST00000166287	Tap1	FALSE	TRUE	FALSE	FALSE	.	0	0	chr17	34187565	34187924	element_166	Active Enhancer	.	0	0
chr17	34190252	34191253	1	ENSMUSG00000037321	ENSMUST00000171148	Tap1	FALSE	FALSE	FALSE	TRUE	.	0	0	.	0	0	.	.	.	0	0
chr17	34192554	34193555	1	ENSMUSG00000037321	ENSMUST00000166582	Tap1	FALSE	FALSE	FALSE	TRUE	.	0	0	.	0	0	.	.	.	0	0
chr17	34187053	34188054	1	ENSMUSG00000037321	ENSMUST00000170086	Tap1	FALSE	TRUE	FALSE	FALSE	.	0	0	chr17	34187565	34187924	element_166	Active Enhancer	.	0	0
chr17	34187302	34188303	1	ENSMUSG00000037321	ENSMUST00000041633	Tap1	FALSE	TRUE	FALSE	FALSE	.	0	0	chr17	34187565	34187924	element_166	Active Enhancer	.	0	0
chr17	34187234	34188235	1	ENSMUSG00000037321	ENSMUST00000166853	Tap1	FALSE	TRUE	FALSE	FALSE	.	0	0	chr17	34187565	34187924	element_166	Active Enhancer	.	0	0
chr17	34189391	34190392	1	ENSMUSG00000037321	ENSMUST00000168351	Tap1	FALSE	FALSE	FALSE	TRUE	.	0	0	.	0	0	.	.	.	0	0
chr17	35265521	35266522	1	ENSMUSG00000073411	ENSMUST00000172503	H2-D1	FALSE	FALSE	FALSE	TRUE	.	0	0	.	0	0	.	.	.	0	0
chr17	35265521	35266522	1	ENSMUSG00000073411	ENSMUST00000173167	H2-D1	FALSE	FALSE	FALSE	TRUE	.	0	0	.	0	0	.	.	.	0	0
chr17	35264977	35265978	1	ENSMUSG00000073411	ENSMUST00000174325	H2-D1	FALSE	FALSE	FALSE	TRUE	.	0	0	.	0	0	.	.	.	0	0
chr17	35262230	35263231	1	ENSMUSG00000073411	ENSMUST00000172785	H2-D1	FALSE	FALSE	FALSE	TRUE	.	0	0	.	0	0	.	.	.	0	0
chr17	35379117	35380118	1	ENSMUSG00000035929	ENSMUST00000173975	H2-Q4	FALSE	FALSE	FALSE	TRUE	.	0	0	.	0	0	.	.	.	0	0
chr17	35379117	35380118	1	ENSMUSG00000035929	ENSMUST00000081435	H2-Q4	FALSE	FALSE	FALSE	TRUE	.	0	0	.	0	0	.	.	.	0	0
chr17	33912250	33913251	1	ENSMUSG00000002307	ENSMUST00000174646	Daxx	FALSE	FALSE	FALSE	TRUE	.	0	0	.	0	0	.	.	.	0	0
chr17	33909015	33910016	1	ENSMUSG00000002307	ENSMUST00000174541	Daxx	FALSE	FALSE	FALSE	TRUE	.	0	0	.	0	0	.	.	.	0	0
chr17	33908914	33909915	1	ENSMUSG00000002307	ENSMUST00000173028	Daxx	FALSE	FALSE	FALSE	TRUE	.	0	0	.	0	0	.	.	.	0	0
chr17	33909926	33910927	1	ENSMUSG00000002307	ENSMUST00000174146	Daxx	FALSE	FALSE	FALSE	TRUE	.	0	0	.	0	0	.	.	.	0	0
chr17	33913059	33914060	1	ENSMUSG00000002307	ENSMUST00000173279	Daxx	FALSE	FALSE	FALSE	TRUE	.	0	0	.	0	0	.	.	.	0	0
chr17	33909101	33910102	1	ENSMUSG00000002307	ENSMUST00000170075	Daxx	FALSE	FALSE	FALSE	TRUE	.	0	0	.	0	0	.	.	.	0	0
chr17	33908998	33909999	1	ENSMUSG00000002307	ENSMUST00000173626	Daxx	FALSE	FALSE	FALSE	TRUE	.	0	0	.	0	0	.	.	.	0	0
chr17	33908945	33909946	1	ENSMUSG00000002307	ENSMUST00000079421	Daxx	FALSE	FALSE	FALSE	TRUE	.	0	0	.	0	0	.	.	.	0	0
chr17	33909777	33910778	1	ENSMUSG00000002307	ENSMUST00000172859	Daxx	FALSE	FALSE	FALSE	TRUE	.	0	0	.	0	0	.	.	.	0	0
chr17	33925618	33926619	1	ENSMUSG00000024308	ENSMUST00000172653	Tapbp	FALSE	FALSE	FALSE	TRUE	.	0	0	.	0	0	.	.	.	0	0
chr17	33915399	33916400	1	ENSMUSG00000024308	ENSMUST00000172619	Tapbp	FALSE	FALSE	FALSE	TRUE	.	0	0	.	0	0	.	.	.	0	0
chr17	33918832	33919833	1	ENSMUSG00000024308	ENSMUST00000025161	Tapbp	FALSE	TRUE	FALSE	FALSE	.	0	0	chr17	33919497	33919704	element_164	Active Promoter	.	0	0
chr17	33919012	33920013	1	ENSMUSG00000024308	ENSMUST00000172888	Tapbp	FALSE	TRUE	FALSE	FALSE	.	0	0	chr17	33919497	33919704	element_164	Active Promoter	.	0	0
chr17	33920028	33921029	1	ENSMUSG00000024308	ENSMUST00000172489	Tapbp	FALSE	FALSE	FALSE	TRUE	.	0	0	.	0	0	.	.	.	0	0
chr17	37269720	37270721	1	ENSMUSG00000016206	ENSMUST00000038580	H2-M3	FALSE	FALSE	FALSE	TRUE	.	0	0	.	0	0	.	.	.	0	0
chr17	23742734	23743735	1	ENSMUSG00000097006	ENSMUST00000181291	9530082P21Rik	FALSE	FALSE	FALSE	TRUE	.	0	0	.	0	0	.	.	.	0	0
chr17	23748736	23749737	1	ENSMUSG00000097006	ENSMUST00000181605	9530082P21Rik	FALSE	FALSE	FALSE	TRUE	.	0	0	.	0	0	.	.	.	0	0
chr17	23748837	23749838	1	ENSMUSG00000097006	ENSMUST00000180547	9530082P21Rik	FALSE	FALSE	FALSE	TRUE	.	0	0	.	0	0	.	.	.	0	0
chr17	53462820	53463821	-1	ENSMUSG00000023931	ENSMUST00000024725	Efhb	FALSE	FALSE	FALSE	TRUE	.	0	0	.	0	0	.	.	.	0	0
chr17	34183230	34184231	-1	ENSMUSG00000096727	ENSMUST00000171321	Psmb9	FALSE	FALSE	FALSE	TRUE	.	0	0	.	0	0	.	.	.	0	0
chr17	34186837	34187838	-1	ENSMUSG00000096727	ENSMUST00000179593	Psmb9	FALSE	TRUE	FALSE	FALSE	.	0	0	chr17	34187565	34187924	element_166	Active Enhancer	.	0	0
chr17	34187263	34188264	-1	ENSMUSG00000096727	ENSMUST00000174576	Psmb9	FALSE	TRUE	FALSE	FALSE	.	0	0	chr17	34187565	34187924	element_166	Active Enhancer	.	0	0
chr17	34183048	34184049	-1	ENSMUSG00000096727	ENSMUST00000178857	Psmb9	FALSE	FALSE	FALSE	TRUE	.	0	0	.	0	0	.	.	.	0	0
chr17	34186852	34187853	-1	ENSMUSG00000096727	ENSMUST00000114230	Psmb9	FALSE	TRUE	FALSE	FALSE	.	0	0	chr17	34187565	34187924	element_166	Active Enhancer	.	0	0
chr17	34186718	34187719	-1	ENSMUSG00000096727	ENSMUST00000173831	Psmb9	FALSE	TRUE	FALSE	FALSE	.	0	0	chr17	34187565	34187924	element_166	Active Enhancer	.	0	0
chr17	33999782	34000783	-1	ENSMUSG00000061232	ENSMUST00000114311	H2-K1	FALSE	FALSE	FALSE	TRUE	.	0	0	.	0	0	.	.	.	0	0
chr17	33996656	33997657	-1	ENSMUSG00000061232	ENSMUST00000173543	H2-K1	FALSE	FALSE	FALSE	TRUE	.	0	0	.	0	0	.	.	.	0	0
chr17	33997254	33998255	-1	ENSMUSG00000061232	ENSMUST00000173602	H2-K1	FALSE	FALSE	FALSE	TRUE	.	0	0	.	0	0	.	.	.	0	0
chr17	33999788	34000789	-1	ENSMUSG00000061232	ENSMUST00000172912	H2-K1	FALSE	FALSE	FALSE	TRUE	.	0	0	.	0	0	.	.	.	0	0
chr17	33999832	34000833	-1	ENSMUSG00000061232	ENSMUST00000025181	H2-K1	FALSE	FALSE	FALSE	TRUE	.	0	0	.	0	0	.	.	.	0	0
chr17	33999759	34000760	-1	ENSMUSG00000061232	ENSMUST00000173075	H2-K1	FALSE	FALSE	FALSE	TRUE	.	0	0	.	0	0	.	.	.	0	0
chr17	33999756	34000757	-1	ENSMUSG00000061232	ENSMUST00000087189	H2-K1	FALSE	FALSE	FALSE	TRUE	.	0	0	.	0	0	.	.	.	0	0
chr17	33997280	33998281	-1	ENSMUSG00000061232	ENSMUST00000173317	H2-K1	FALSE	FALSE	FALSE	TRUE	.	0	0	.	0	0	.	.	.	0	0
chr17	33998973	33999974	-1	ENSMUSG00000061232	ENSMUST00000172782	H2-K1	FALSE	FALSE	FALSE	TRUE	.	0	0	.	0	0	.	.	.	0	0
chr17	78851455	78852456	-1	ENSMUSG00000091549	ENSMUST00000167498	Gm6548	FALSE	FALSE	FALSE	TRUE	.	0	0	.	0	0	.	.	.	0	0
chr17	78882072	78883073	-1	ENSMUSG00000024079	ENSMUST00000024884	Eif2ak2	FALSE	TRUE	FALSE	FALSE	.	0	0	chr17	78882304	78882748	element_179	Active Promoter	.	0	0
chr17	78882053	78883054	-1	ENSMUSG00000024079	ENSMUST00000171451	Eif2ak2	FALSE	TRUE	FALSE	FALSE	.	0	0	chr17	78882304	78882748	element_179	Active Promoter	.	0	0
chr17	78882047	78883048	-1	ENSMUSG00000024079	ENSMUST00000171852	Eif2ak2	FALSE	TRUE	FALSE	FALSE	.	0	0	chr17	78882304	78882748	element_179	Active Promoter	.	0	0
chr17	78858479	78859480	-1	ENSMUSG00000024079	ENSMUST00000169940	Eif2ak2	FALSE	FALSE	FALSE	TRUE	.	0	0	.	0	0	.	.	.	0	0
chr17	34881525	34882526	-1	ENSMUSG00000024371	ENSMUST00000152417	C2	FALSE	FALSE	FALSE	TRUE	.	0	0	.	0	0	.	.	.	0	0
chr17	34881599	34882600	-1	ENSMUSG00000024371	ENSMUST00000025230	C2	FALSE	FALSE	FALSE	TRUE	.	0	0	.	0	0	.	.	.	0	0
chr17	34895056	34896057	-1	ENSMUSG00000024371	ENSMUST00000174880	C2	FALSE	FALSE	FALSE	TRUE	.	0	0	.	0	0	.	.	.	0	0
chr17	34881466	34882467	-1	ENSMUSG00000024371	ENSMUST00000130728	C2	FALSE	FALSE	FALSE	TRUE	.	0	0	.	0	0	.	.	.	0	0
chr17	34864451	34865452	-1	ENSMUSG00000024371	ENSMUST00000127795	C2	FALSE	FALSE	FALSE	TRUE	.	0	0	.	0	0	.	.	.	0	0
chr17	34863911	34864912	-1	ENSMUSG00000024371	ENSMUST00000134300	C2	FALSE	FALSE	FALSE	TRUE	.	0	0	.	0	0	.	.	.	0	0
chr17	34897764	34898765	-1	ENSMUSG00000024371	ENSMUST00000174279	C2	FALSE	FALSE	FALSE	TRUE	.	0	0	.	0	0	.	.	.	0	0
chr17	34895046	34896047	-1	ENSMUSG00000024371	ENSMUST00000148431	C2	FALSE	FALSE	FALSE	TRUE	.	0	0	.	0	0	.	.	.	0	0
chr17	36020024	36021025	-1	ENSMUSG00000053835	ENSMUST00000174063	H2-T24	FALSE	TRUE	FALSE	FALSE	.	0	0	chr17	36020587	36021165	element_169	Poised	.	0	0
chr17	36020059	36021060	-1	ENSMUSG00000053835	ENSMUST00000113760	H2-T24	FALSE	TRUE	FALSE	FALSE	.	0	0	chr17	36020587	36021165	element_169	Poised	.	0	0
chr17	36032040	36033041	-1	ENSMUSG00000067212	ENSMUST00000174161	H2-T23	FALSE	FALSE	FALSE	TRUE	.	0	0	.	0	0	.	.	.	0	0
chr17	36032229	36033230	-1	ENSMUSG00000067212	ENSMUST00000174471	H2-T23	FALSE	FALSE	FALSE	TRUE	.	0	0	.	0	0	.	.	.	0	0
chr17	36032354	36033355	-1	ENSMUSG00000067212	ENSMUST00000102678	H2-T23	FALSE	FALSE	FALSE	TRUE	.	0	0	.	0	0	.	.	.	0	0
chr17	36032189	36033190	-1	ENSMUSG00000067212	ENSMUST00000174839	H2-T23	FALSE	FALSE	FALSE	TRUE	.	0	0	.	0	0	.	.	.	0	0
chr17	36041999	36043000	-1	ENSMUSG00000056116	ENSMUST00000172633	H2-T22	FALSE	FALSE	FALSE	TRUE	.	0	0	.	0	0	.	.	.	0	0
chr17	36042204	36043205	-1	ENSMUSG00000056116	ENSMUST00000080015	H2-T22	FALSE	FALSE	FALSE	TRUE	.	0	0	.	0	0	.	.	.	0	0
chr17	36042189	36043190	-1	ENSMUSG00000056116	ENSMUST00000058801	H2-T22	FALSE	FALSE	FALSE	TRUE	.	0	0	.	0	0	.	.	.	0	0
chr17	36042182	36043183	-1	ENSMUSG00000056116	ENSMUST00000173280	H2-T22	FALSE	FALSE	FALSE	TRUE	.	0	0	.	0	0	.	.	.	0	0
chr17	36042246	36043247	-1	ENSMUSG00000056116	ENSMUST00000077960	H2-T22	FALSE	FALSE	FALSE	TRUE	.	0	0	.	0	0	.	.	.	0	0
chr17	36120648	36121649	-1	ENSMUSG00000079491	ENSMUST00000166442	H2-T10	FALSE	FALSE	FALSE	TRUE	.	0	0	.	0	0	.	.	.	0	0
chr17	36120964	36121965	-1	ENSMUSG00000079491	ENSMUST00000174382	H2-T10	FALSE	FALSE	FALSE	TRUE	.	0	0	.	0	0	.	.	.	0	0
chr17	36120934	36121935	-1	ENSMUSG00000079491	ENSMUST00000174625	H2-T10	FALSE	FALSE	FALSE	TRUE	.	0	0	.	0	0	.	.	.	0	0
chr18	60375529	60376530	1	ENSMUSG00000054072	ENSMUST00000032473	Iigp1	FALSE	FALSE	FALSE	TRUE	.	0	0	.	0	0	.	.	.	0	0
chr18	60375529	60376530	1	ENSMUSG00000054072	ENSMUST00000066912	Iigp1	FALSE	FALSE	FALSE	TRUE	.	0	0	.	0	0	.	.	.	0	0
chr18	60211580	60212581	1	ENSMUSG00000073555	ENSMUST00000031549	Gm4951	FALSE	FALSE	FALSE	TRUE	.	0	0	.	0	0	.	.	.	0	0
chr18	4352456	4353457	-1	ENSMUSG00000024235	ENSMUST00000173930	Map3k8	FALSE	FALSE	FALSE	TRUE	.	0	0	.	0	0	.	.	.	0	0
chr18	4352452	4353453	-1	ENSMUSG00000024235	ENSMUST00000025078	Map3k8	FALSE	FALSE	FALSE	TRUE	.	0	0	.	0	0	.	.	.	0	0
chr18	4334547	4335548	-1	ENSMUSG00000024235	ENSMUST00000173708	Map3k8	FALSE	FALSE	FALSE	TRUE	.	0	0	.	0	0	.	.	.	0	0
chr18	4335794	4336795	-1	ENSMUSG00000024235	ENSMUST00000105472	Map3k8	FALSE	FALSE	FALSE	TRUE	.	0	0	.	0	0	.	.	.	0	0
chr18	4352514	4353515	-1	ENSMUSG00000024235	ENSMUST00000172805	Map3k8	FALSE	FALSE	FALSE	TRUE	.	0	0	.	0	0	.	.	.	0	0
chr19	12460279	12461280	1	ENSMUSG00000046805	ENSMUST00000081035	Mpeg1	TRUE	FALSE	FALSE	FALSE	chr19	12460645	12460942	.	0	0	.	.	.	0	0
chr19	6140483	6141484	1	ENSMUSG00000039699	ENSMUST00000134150	Batf2	FALSE	FALSE	FALSE	TRUE	.	0	0	.	0	0	.	.	.	0	0
chr19	6163954	6164955	1	ENSMUSG00000039699	ENSMUST00000135461	Batf2	FALSE	FALSE	FALSE	TRUE	.	0	0	.	0	0	.	.	.	0	0
chr19	6163939	6164940	1	ENSMUSG00000039699	ENSMUST00000045042	Batf2	FALSE	FALSE	FALSE	TRUE	.	0	0	.	0	0	.	.	.	0	0
chr19	6163954	6164955	1	ENSMUSG00000039699	ENSMUST00000139326	Batf2	FALSE	FALSE	FALSE	TRUE	.	0	0	.	0	0	.	.	.	0	0
chr19	6163989	6164990	1	ENSMUSG00000039699	ENSMUST00000141858	Batf2	FALSE	FALSE	FALSE	TRUE	.	0	0	.	0	0	.	.	.	0	0
chr19	6163960	6164961	1	ENSMUSG00000039699	ENSMUST00000132750	Batf2	FALSE	FALSE	FALSE	TRUE	.	0	0	.	0	0	.	.	.	0	0
chr19	34550194	34551195	1	ENSMUSG00000045932	ENSMUST00000149829	Ifit2	FALSE	FALSE	FALSE	TRUE	.	0	0	.	0	0	.	.	.	0	0
chr19	34550210	34551211	1	ENSMUSG00000045932	ENSMUST00000102826	Ifit2	FALSE	FALSE	FALSE	TRUE	.	0	0	.	0	0	.	.	.	0	0
chr19	34583031	34584032	1	ENSMUSG00000074896	ENSMUST00000102825	Ifit3	FALSE	FALSE	FALSE	TRUE	.	0	0	.	0	0	.	.	.	0	0
chr19	34607470	34608471	1	ENSMUSG00000062488	ENSMUST00000076249	Ifit3b	FALSE	FALSE	FALSE	TRUE	.	0	0	.	0	0	.	.	.	0	0
chr19	34640371	34641372	1	ENSMUSG00000034459	ENSMUST00000102824	Ifit1	FALSE	TRUE	FALSE	FALSE	.	0	0	chr19	34640630	34640934	element_198	Poised	.	0	0
chr19	29366955	29367956	1	ENSMUSG00000016496	ENSMUST00000016640	Cd274	FALSE	FALSE	FALSE	TRUE	.	0	0	.	0	0	.	.	.	0	0
chr19	34640242	34641243	-1	ENSMUSG00000067297	ENSMUST00000087357	Ifit1bl2	FALSE	TRUE	FALSE	FALSE	.	0	0	chr19	34640630	34640934	element_198	Poised	.	0	0
chr19	34629309	34630310	-1	ENSMUSG00000067297	ENSMUST00000112463	Ifit1bl2	FALSE	FALSE	FALSE	TRUE	.	0	0	.	0	0	.	.	.	0	0
chr19	3902571	3903572	-1	ENSMUSG00000001750	ENSMUST00000131327	Tcirg1	FALSE	FALSE	FALSE	TRUE	.	0	0	.	0	0	.	.	.	0	0
chr19	3897330	3898331	-1	ENSMUSG00000001750	ENSMUST00000134698	Tcirg1	FALSE	FALSE	FALSE	TRUE	.	0	0	.	0	0	.	.	.	0	0
chr19	3898352	3899353	-1	ENSMUSG00000001750	ENSMUST00000126643	Tcirg1	FALSE	FALSE	FALSE	TRUE	.	0	0	.	0	0	.	.	.	0	0
chr19	3904729	3905730	-1	ENSMUSG00000001750	ENSMUST00000145791	Tcirg1	FALSE	FALSE	FALSE	TRUE	.	0	0	.	0	0	.	.	.	0	0
chr19	3902854	3903855	-1	ENSMUSG00000001750	ENSMUST00000132164	Tcirg1	FALSE	FALSE	FALSE	TRUE	.	0	0	.	0	0	.	.	.	0	0
chr19	3906490	3907491	-1	ENSMUSG00000001750	ENSMUST00000126070	Tcirg1	FALSE	FALSE	FALSE	TRUE	.	0	0	.	0	0	.	.	.	0	0
chr19	3903920	3904921	-1	ENSMUSG00000001750	ENSMUST00000127308	Tcirg1	FALSE	FALSE	FALSE	TRUE	.	0	0	.	0	0	.	.	.	0	0
chr19	3902745	3903746	-1	ENSMUSG00000001750	ENSMUST00000159824	Tcirg1	FALSE	FALSE	FALSE	TRUE	.	0	0	.	0	0	.	.	.	0	0
chr19	3906539	3907540	-1	ENSMUSG00000001750	ENSMUST00000125792	Tcirg1	FALSE	FALSE	FALSE	TRUE	.	0	0	.	0	0	.	.	.	0	0
chr19	3896729	3897730	-1	ENSMUSG00000001750	ENSMUST00000162688	Tcirg1	FALSE	FALSE	FALSE	TRUE	.	0	0	.	0	0	.	.	.	0	0
chr19	3901522	3902523	-1	ENSMUSG00000001750	ENSMUST00000122885	Tcirg1	FALSE	FALSE	FALSE	TRUE	.	0	0	.	0	0	.	.	.	0	0
chr19	3906611	3907612	-1	ENSMUSG00000001750	ENSMUST00000135070	Tcirg1	FALSE	FALSE	FALSE	TRUE	.	0	0	.	0	0	.	.	.	0	0
chr19	3906632	3907633	-1	ENSMUSG00000001750	ENSMUST00000001801	Tcirg1	FALSE	FALSE	FALSE	TRUE	.	0	0	.	0	0	.	.	.	0	0
chr19	12530039	12531040	-1	ENSMUSG00000111118	ENSMUST00000217186	Gm6545	FALSE	FALSE	FALSE	TRUE	.	0	0	.	0	0	.	.	.	0	0
chr2	180588745	180589746	1	ENSMUSG00000049401	ENSMUST00000029087	Ogfr	FALSE	TRUE	FALSE	FALSE	.	0	0	chr2	180589263	180589644	element_222	Active Enhancer	.	0	0
chr2	180588962	180589963	1	ENSMUSG00000049401	ENSMUST00000147070	Ogfr	FALSE	TRUE	FALSE	FALSE	.	0	0	chr2	180589263	180589644	element_222	Active Enhancer	.	0	0
chr2	122147186	122148187	1	ENSMUSG00000060802	ENSMUST00000102476	B2m	FALSE	FALSE	FALSE	TRUE	.	0	0	.	0	0	.	.	.	0	0
chr2	84798334	84799335	1	ENSMUSG00000027078	ENSMUST00000150325	Ube2l6	FALSE	FALSE	FALSE	TRUE	.	0	0	.	0	0	.	.	.	0	0
chr2	84805729	84806730	1	ENSMUSG00000027078	ENSMUST00000159150	Ube2l6	FALSE	FALSE	FALSE	TRUE	.	0	0	.	0	0	.	.	.	0	0
chr2	84798328	84799329	1	ENSMUSG00000027078	ENSMUST00000102642	Ube2l6	FALSE	FALSE	FALSE	TRUE	.	0	0	.	0	0	.	.	.	0	0
chr2	84802203	84803204	1	ENSMUSG00000027078	ENSMUST00000154709	Ube2l6	FALSE	FALSE	FALSE	TRUE	.	0	0	.	0	0	.	.	.	0	0
chr2	147361425	147362426	1	ENSMUSG00000037034	ENSMUST00000126068	Pax1	FALSE	FALSE	FALSE	TRUE	.	0	0	.	0	0	.	.	.	0	0
chr2	147367782	147368783	1	ENSMUSG00000037034	ENSMUST00000156584	Pax1	FALSE	FALSE	FALSE	TRUE	.	0	0	.	0	0	.	.	.	0	0
chr2	147364494	147365495	1	ENSMUSG00000037034	ENSMUST00000109968	Pax1	FALSE	FALSE	FALSE	TRUE	.	0	0	.	0	0	.	.	.	0	0
chr2	103969028	103970029	1	ENSMUSG00000032698	ENSMUST00000123437	Lmo2	FALSE	FALSE	FALSE	TRUE	.	0	0	.	0	0	.	.	.	0	0
chr2	103969723	103970724	1	ENSMUSG00000032698	ENSMUST00000111140	Lmo2	FALSE	FALSE	FALSE	TRUE	.	0	0	.	0	0	.	.	.	0	0
chr2	103957495	103958496	1	ENSMUSG00000032698	ENSMUST00000170926	Lmo2	FALSE	FALSE	FALSE	TRUE	.	0	0	.	0	0	.	.	.	0	0
chr2	103957486	103958487	1	ENSMUSG00000032698	ENSMUST00000156813	Lmo2	FALSE	FALSE	FALSE	TRUE	.	0	0	.	0	0	.	.	.	0	0
chr2	103969744	103970745	1	ENSMUSG00000032698	ENSMUST00000111139	Lmo2	FALSE	FALSE	FALSE	TRUE	.	0	0	.	0	0	.	.	.	0	0
chr2	103969629	103970630	1	ENSMUSG00000032698	ENSMUST00000111143	Lmo2	FALSE	FALSE	FALSE	TRUE	.	0	0	.	0	0	.	.	.	0	0
chr2	103970679	103971680	1	ENSMUSG00000032698	ENSMUST00000133210	Lmo2	FALSE	FALSE	FALSE	TRUE	.	0	0	.	0	0	.	.	.	0	0
chr2	103969641	103970642	1	ENSMUSG00000032698	ENSMUST00000138815	Lmo2	FALSE	FALSE	FALSE	TRUE	.	0	0	.	0	0	.	.	.	0	0
chr2	181241462	181242463	-1	ENSMUSG00000027580	ENSMUST00000121484	Helz2	FALSE	TRUE	FALSE	FALSE	.	0	0	chr2	181241853	181242151	element_223	Poised	.	0	0
chr2	181241524	181242525	-1	ENSMUSG00000027580	ENSMUST00000155049	Helz2	FALSE	TRUE	FALSE	FALSE	.	0	0	chr2	181241853	181242151	element_223	Poised	.	0	0
chr2	181241524	181242525	-1	ENSMUSG00000027580	ENSMUST00000094203	Helz2	FALSE	TRUE	FALSE	FALSE	.	0	0	chr2	181241853	181242151	element_223	Poised	.	0	0
chr2	181235253	181236254	-1	ENSMUSG00000027580	ENSMUST00000149417	Helz2	FALSE	FALSE	FALSE	TRUE	.	0	0	.	0	0	.	.	.	0	0
chr2	181241526	181242527	-1	ENSMUSG00000027580	ENSMUST00000108831	Helz2	FALSE	TRUE	FALSE	FALSE	.	0	0	chr2	181241853	181242151	element_223	Poised	.	0	0
chr2	167062514	167063515	-1	ENSMUSG00000039501	ENSMUST00000048988	Znfx1	FALSE	FALSE	FALSE	TRUE	.	0	0	.	0	0	.	.	.	0	0
chr2	167062215	167063216	-1	ENSMUSG00000039501	ENSMUST00000128676	Znfx1	FALSE	FALSE	FALSE	TRUE	.	0	0	.	0	0	.	.	.	0	0
chr2	167059924	167060925	-1	ENSMUSG00000039501	ENSMUST00000155281	Znfx1	FALSE	FALSE	FALSE	TRUE	.	0	0	.	0	0	.	.	.	0	0
chr2	167042994	167043995	-1	ENSMUSG00000039501	ENSMUST00000067584	Znfx1	FALSE	FALSE	FALSE	TRUE	.	0	0	.	0	0	.	.	.	0	0
chr2	167062138	167063139	-1	ENSMUSG00000039501	ENSMUST00000135967	Znfx1	FALSE	FALSE	FALSE	TRUE	.	0	0	.	0	0	.	.	.	0	0
chr2	51934662	51935663	-1	ENSMUSG00000036249	ENSMUST00000102768	Rbm43	FALSE	FALSE	FALSE	TRUE	.	0	0	.	0	0	.	.	.	0	0
chr2	51934506	51935507	-1	ENSMUSG00000036249	ENSMUST00000102767	Rbm43	FALSE	FALSE	FALSE	TRUE	.	0	0	.	0	0	.	.	.	0	0
chr2	51934143	51935144	-1	ENSMUSG00000036249	ENSMUST00000165313	Rbm43	FALSE	FALSE	FALSE	TRUE	.	0	0	.	0	0	.	.	.	0	0
chr2	51926525	51927526	-1	ENSMUSG00000036249	ENSMUST00000152800	Rbm43	FALSE	FALSE	FALSE	TRUE	.	0	0	.	0	0	.	.	.	0	0
chr2	51934173	51935174	-1	ENSMUSG00000036249	ENSMUST00000132703	Rbm43	FALSE	FALSE	FALSE	TRUE	.	0	0	.	0	0	.	.	.	0	0
chr2	51932834	51933835	-1	ENSMUSG00000036249	ENSMUST00000126090	Rbm43	FALSE	FALSE	FALSE	TRUE	.	0	0	.	0	0	.	.	.	0	0
chr2	51952076	51953077	-1	ENSMUSG00000026946	ENSMUST00000142868	Nmi	FALSE	FALSE	FALSE	TRUE	.	0	0	.	0	0	.	.	.	0	0
chr2	51972993	51973994	-1	ENSMUSG00000026946	ENSMUST00000145656	Nmi	FALSE	FALSE	FALSE	TRUE	.	0	0	.	0	0	.	.	.	0	0
chr2	51972723	51973724	-1	ENSMUSG00000026946	ENSMUST00000028314	Nmi	FALSE	FALSE	FALSE	TRUE	.	0	0	.	0	0	.	.	.	0	0
chr2	51972469	51973470	-1	ENSMUSG00000026946	ENSMUST00000123521	Nmi	FALSE	FALSE	FALSE	TRUE	.	0	0	.	0	0	.	.	.	0	0
chr2	51972503	51973504	-1	ENSMUSG00000026946	ENSMUST00000145481	Nmi	FALSE	FALSE	FALSE	TRUE	.	0	0	.	0	0	.	.	.	0	0
chr2	51972515	51973516	-1	ENSMUSG00000026946	ENSMUST00000112705	Nmi	FALSE	FALSE	FALSE	TRUE	.	0	0	.	0	0	.	.	.	0	0
chr2	173218409	173219410	-1	ENSMUSG00000027514	ENSMUST00000109116	Zbp1	FALSE	TRUE	FALSE	FALSE	.	0	0	chr2	173218785	173219091	element_221	Poised	.	0	0
chr2	173218396	173219397	-1	ENSMUSG00000027514	ENSMUST00000146802	Zbp1	FALSE	TRUE	FALSE	FALSE	.	0	0	chr2	173218785	173219091	element_221	Poised	.	0	0
chr2	173218422	173219423	-1	ENSMUSG00000027514	ENSMUST00000029018	Zbp1	FALSE	TRUE	FALSE	FALSE	.	0	0	chr2	173218785	173219091	element_221	Poised	.	0	0
chr2	62645652	62646653	-1	ENSMUSG00000026896	ENSMUST00000112459	Ifih1	FALSE	TRUE	FALSE	FALSE	.	0	0	chr2	62646106	62646344	element_229	Poised	.	0	0
chr2	62645754	62646755	-1	ENSMUSG00000026896	ENSMUST00000176431	Ifih1	FALSE	TRUE	FALSE	FALSE	.	0	0	chr2	62646106	62646344	element_229	Poised	.	0	0
chr2	62638972	62639973	-1	ENSMUSG00000026896	ENSMUST00000176388	Ifih1	FALSE	FALSE	FALSE	TRUE	.	0	0	.	0	0	.	.	.	0	0
chr2	62645657	62646658	-1	ENSMUSG00000026896	ENSMUST00000175964	Ifih1	FALSE	TRUE	FALSE	FALSE	.	0	0	chr2	62646106	62646344	element_229	Poised	.	0	0
chr2	62645710	62646711	-1	ENSMUSG00000026896	ENSMUST00000028259	Ifih1	FALSE	TRUE	FALSE	FALSE	.	0	0	chr2	62646106	62646344	element_229	Poised	.	0	0
chr3	116594512	116595513	1	ENSMUSG00000027959	ENSMUST00000029571	Sass6	FALSE	FALSE	FALSE	TRUE	.	0	0	.	0	0	.	.	.	0	0
chr3	116612836	116613837	1	ENSMUSG00000027959	ENSMUST00000196619	Sass6	FALSE	FALSE	FALSE	TRUE	.	0	0	.	0	0	.	.	.	0	0
chr3	116594508	116595509	1	ENSMUSG00000027959	ENSMUST00000198311	Sass6	FALSE	FALSE	FALSE	TRUE	.	0	0	.	0	0	.	.	.	0	0
chr3	116594482	116595483	1	ENSMUSG00000027959	ENSMUST00000198386	Sass6	FALSE	FALSE	FALSE	TRUE	.	0	0	.	0	0	.	.	.	0	0
chr3	116594510	116595511	1	ENSMUSG00000027959	ENSMUST00000197335	Sass6	FALSE	FALSE	FALSE	TRUE	.	0	0	.	0	0	.	.	.	0	0
chr3	116594503	116595504	1	ENSMUSG00000027959	ENSMUST00000198514	Sass6	FALSE	FALSE	FALSE	TRUE	.	0	0	.	0	0	.	.	.	0	0
chr3	116620959	116621960	1	ENSMUSG00000027959	ENSMUST00000197063	Sass6	FALSE	FALSE	FALSE	TRUE	.	0	0	.	0	0	.	.	.	0	0
chr3	116625423	116626424	1	ENSMUSG00000027959	ENSMUST00000198747	Sass6	FALSE	FALSE	FALSE	TRUE	.	0	0	.	0	0	.	.	.	0	0
chr3	142620135	142621136	1	ENSMUSG00000028270	ENSMUST00000169572	Gbp2	FALSE	FALSE	FALSE	TRUE	.	0	0	.	0	0	.	.	.	0	0
chr3	142620102	142621103	1	ENSMUSG00000028270	ENSMUST00000165774	Gbp2	FALSE	FALSE	FALSE	TRUE	.	0	0	.	0	0	.	.	.	0	0
chr3	27316528	27317529	1	ENSMUSG00000039304	ENSMUST00000046383	Tnfsf10	FALSE	FALSE	FALSE	TRUE	.	0	0	.	0	0	.	.	.	0	0
chr3	27316561	27317562	1	ENSMUSG00000039304	ENSMUST00000174840	Tnfsf10	FALSE	FALSE	FALSE	TRUE	.	0	0	.	0	0	.	.	.	0	0
chr3	142594347	142595348	1	ENSMUSG00000040264	ENSMUST00000029936	Gbp2b	FALSE	FALSE	FALSE	TRUE	.	0	0	.	0	0	.	.	.	0	0
chr3	142529842	142530843	1	ENSMUSG00000040253	ENSMUST00000045097	Gbp7	FALSE	TRUE	FALSE	FALSE	.	0	0	chr3	142530129	142530440	element_244	Poised	.	0	0
chr3	142529842	142530843	1	ENSMUSG00000040253	ENSMUST00000171263	Gbp7	FALSE	TRUE	FALSE	FALSE	.	0	0	chr3	142530129	142530440	element_244	Poised	.	0	0
chr3	142560734	142561735	1	ENSMUSG00000028268	ENSMUST00000142060	Gbp3	FALSE	FALSE	FALSE	TRUE	.	0	0	.	0	0	.	.	.	0	0
chr3	142559911	142560912	1	ENSMUSG00000028268	ENSMUST00000106221	Gbp3	FALSE	TRUE	FALSE	FALSE	.	0	0	chr3	142559782	142560217	element_245	Poised	.	0	0
chr3	142559675	142560676	1	ENSMUSG00000028268	ENSMUST00000142731	Gbp3	FALSE	TRUE	FALSE	FALSE	.	0	0	chr3	142559782	142560217	element_245	Poised	.	0	0
chr3	142559552	142560553	1	ENSMUSG00000028268	ENSMUST00000106222	Gbp3	FALSE	TRUE	FALSE	FALSE	.	0	0	chr3	142559782	142560217	element_245	Poised	.	0	0
chr3	142559645	142560646	1	ENSMUSG00000028268	ENSMUST00000029935	Gbp3	FALSE	TRUE	FALSE	FALSE	.	0	0	chr3	142559782	142560217	element_245	Poised	.	0	0
chr3	142559526	142560527	1	ENSMUSG00000028268	ENSMUST00000199325	Gbp3	FALSE	TRUE	FALSE	FALSE	.	0	0	chr3	142559782	142560217	element_245	Poised	.	0	0
chr3	142559643	142560644	1	ENSMUSG00000028268	ENSMUST00000128609	Gbp3	FALSE	TRUE	FALSE	FALSE	.	0	0	chr3	142559782	142560217	element_245	Poised	.	0	0
chr3	89745145	89746146	1	ENSMUSG00000027951	ENSMUST00000131030	Adar	FALSE	FALSE	FALSE	TRUE	.	0	0	.	0	0	.	.	.	0	0
chr3	89714832	89715833	1	ENSMUSG00000027951	ENSMUST00000123691	Adar	FALSE	FALSE	FALSE	TRUE	.	0	0	.	0	0	.	.	.	0	0
chr3	89714522	89715523	1	ENSMUSG00000027951	ENSMUST00000197253	Adar	FALSE	FALSE	FALSE	TRUE	.	0	0	.	0	0	.	.	.	0	0
chr3	89737086	89738087	1	ENSMUSG00000027951	ENSMUST00000150637	Adar	FALSE	FALSE	FALSE	TRUE	.	0	0	.	0	0	.	.	.	0	0
chr3	89730248	89731249	1	ENSMUSG00000027951	ENSMUST00000029563	Adar	FALSE	TRUE	FALSE	FALSE	.	0	0	chr3	89730475	89731055	element_256	Active Enhancer	.	0	0
chr3	89730248	89731249	1	ENSMUSG00000027951	ENSMUST00000121094	Adar	FALSE	TRUE	FALSE	FALSE	.	0	0	chr3	89730475	89731055	element_256	Active Enhancer	.	0	0
chr3	89730248	89731249	1	ENSMUSG00000027951	ENSMUST00000118341	Adar	FALSE	TRUE	FALSE	FALSE	.	0	0	chr3	89730475	89731055	element_256	Active Enhancer	.	0	0
chr3	89730248	89731249	1	ENSMUSG00000027951	ENSMUST00000107405	Adar	FALSE	TRUE	FALSE	FALSE	.	0	0	chr3	89730475	89731055	element_256	Active Enhancer	.	0	0
chr3	89714522	89715523	1	ENSMUSG00000027951	ENSMUST00000098924	Adar	FALSE	FALSE	FALSE	TRUE	.	0	0	.	0	0	.	.	.	0	0
chr3	40708355	40709356	1	ENSMUSG00000069041	ENSMUST00000091184	Slc25a31	FALSE	FALSE	FALSE	TRUE	.	0	0	.	0	0	.	.	.	0	0
chr3	151749381	151750382	-1	ENSMUSG00000028037	ENSMUST00000149919	Ifi44	FALSE	FALSE	FALSE	TRUE	.	0	0	.	0	0	.	.	.	0	0
chr3	151749402	151750403	-1	ENSMUSG00000028037	ENSMUST00000127733	Ifi44	FALSE	FALSE	FALSE	TRUE	.	0	0	.	0	0	.	.	.	0	0
chr3	151749446	151750447	-1	ENSMUSG00000028037	ENSMUST00000133888	Ifi44	FALSE	FALSE	FALSE	TRUE	.	0	0	.	0	0	.	.	.	0	0
chr3	151749459	151750460	-1	ENSMUSG00000028037	ENSMUST00000029671	Ifi44	FALSE	FALSE	FALSE	TRUE	.	0	0	.	0	0	.	.	.	0	0
chr4	156202804	156203805	1	ENSMUSG00000078349	ENSMUST00000105140	AW011738	FALSE	FALSE	FALSE	TRUE	.	0	0	.	0	0	.	.	.	0	0
chr4	45972334	45973335	1	ENSMUSG00000035517	ENSMUST00000151422	Tdrd7	FALSE	TRUE	FALSE	FALSE	.	0	0	chr4	45972168	45972662	element_277	Poised	.	0	0
chr4	45971733	45972734	1	ENSMUSG00000035517	ENSMUST00000102929	Tdrd7	FALSE	TRUE	FALSE	FALSE	.	0	0	chr4	45972168	45972662	element_277	Poised	.	0	0
chr4	45964834	45965835	1	ENSMUSG00000035517	ENSMUST00000107777	Tdrd7	FALSE	FALSE	FALSE	TRUE	.	0	0	.	0	0	.	.	.	0	0
chr4	45989663	45990664	1	ENSMUSG00000035517	ENSMUST00000140270	Tdrd7	FALSE	FALSE	FALSE	TRUE	.	0	0	.	0	0	.	.	.	0	0
chr4	46025601	46026602	1	ENSMUSG00000035517	ENSMUST00000155936	Tdrd7	FALSE	FALSE	FALSE	TRUE	.	0	0	.	0	0	.	.	.	0	0
chr4	124656307	124657308	1	ENSMUSG00000090125	ENSMUST00000053491	Pou3f1	FALSE	FALSE	FALSE	TRUE	.	0	0	.	0	0	.	.	.	0	0
chr4	130792204	130793205	1	ENSMUSG00000025743	ENSMUST00000146093	Sdc3	FALSE	FALSE	FALSE	TRUE	.	0	0	.	0	0	.	.	.	0	0
chr4	130792037	130793038	1	ENSMUSG00000025743	ENSMUST00000070478	Sdc3	FALSE	FALSE	FALSE	TRUE	.	0	0	.	0	0	.	.	.	0	0
chr4	130811438	130812439	1	ENSMUSG00000025743	ENSMUST00000152591	Sdc3	FALSE	FALSE	FALSE	TRUE	.	0	0	.	0	0	.	.	.	0	0
chr4	130813804	130814805	1	ENSMUSG00000025743	ENSMUST00000141297	Sdc3	FALSE	FALSE	FALSE	TRUE	.	0	0	.	0	0	.	.	.	0	0
chr4	130816345	130817346	1	ENSMUSG00000025743	ENSMUST00000140623	Sdc3	FALSE	FALSE	FALSE	TRUE	.	0	0	.	0	0	.	.	.	0	0
chr4	156200317	156201318	-1	ENSMUSG00000035692	ENSMUST00000085425	Isg15	FALSE	TRUE	FALSE	FALSE	.	0	0	chr4	156200675	156201147	element_273	Poised	.	0	0
chr4	46534103	46535104	-1	ENSMUSG00000039853	ENSMUST00000142606	Trim14	FALSE	FALSE	FALSE	TRUE	.	0	0	.	0	0	.	.	.	0	0
chr4	46535613	46536614	-1	ENSMUSG00000039853	ENSMUST00000102924	Trim14	FALSE	FALSE	TRUE	FALSE	.	0	0	.	0	0	.	.	chr4	46535911	46536349
chr4	46535640	46536641	-1	ENSMUSG00000039853	ENSMUST00000046897	Trim14	FALSE	FALSE	TRUE	FALSE	.	0	0	.	0	0	.	.	chr4	46535911	46536349
chr4	46533913	46534914	-1	ENSMUSG00000039853	ENSMUST00000136978	Trim14	FALSE	FALSE	FALSE	TRUE	.	0	0	.	0	0	.	.	.	0	0
chr4	46535621	46536622	-1	ENSMUSG00000039853	ENSMUST00000184112	Trim14	FALSE	FALSE	TRUE	FALSE	.	0	0	.	0	0	.	.	chr4	46535911	46536349
chr4	46533941	46534942	-1	ENSMUSG00000039853	ENSMUST00000142502	Trim14	FALSE	FALSE	FALSE	TRUE	.	0	0	.	0	0	.	.	.	0	0
chr4	129573140	129574141	-1	ENSMUSG00000000409	ENSMUST00000102596	Lck	FALSE	FALSE	FALSE	TRUE	.	0	0	.	0	0	.	.	.	0	0
chr4	129557586	129558587	-1	ENSMUSG00000000409	ENSMUST00000139957	Lck	FALSE	FALSE	FALSE	TRUE	.	0	0	.	0	0	.	.	.	0	0
chr4	129555730	129556731	-1	ENSMUSG00000000409	ENSMUST00000127943	Lck	FALSE	TRUE	FALSE	FALSE	.	0	0	chr4	129556567	129556801	element_264	Active Promoter	.	0	0
chr4	129557871	129558872	-1	ENSMUSG00000000409	ENSMUST00000134336	Lck	FALSE	FALSE	FALSE	TRUE	.	0	0	.	0	0	.	.	.	0	0
chr4	129557890	129558891	-1	ENSMUSG00000000409	ENSMUST00000067240	Lck	FALSE	FALSE	FALSE	TRUE	.	0	0	.	0	0	.	.	.	0	0
chr4	129555958	129556959	-1	ENSMUSG00000000409	ENSMUST00000123640	Lck	FALSE	TRUE	FALSE	FALSE	.	0	0	chr4	129556567	129556801	element_264	Active Promoter	.	0	0
chr4	129557871	129558872	-1	ENSMUSG00000000409	ENSMUST00000167288	Lck	FALSE	FALSE	FALSE	TRUE	.	0	0	.	0	0	.	.	.	0	0
chr4	129555347	129556348	-1	ENSMUSG00000000409	ENSMUST00000132030	Lck	FALSE	FALSE	FALSE	TRUE	.	0	0	.	0	0	.	.	.	0	0
chr4	41093947	41094948	-1	ENSMUSG00000028435	ENSMUST00000154722	Aqp3	FALSE	FALSE	FALSE	TRUE	.	0	0	.	0	0	.	.	.	0	0
chr4	41097682	41098683	-1	ENSMUSG00000028435	ENSMUST00000055327	Aqp3	FALSE	FALSE	FALSE	TRUE	.	0	0	.	0	0	.	.	.	0	0
chr4	40213571	40214572	-1	ENSMUSG00000040296	ENSMUST00000135966	Ddx58	FALSE	FALSE	FALSE	TRUE	.	0	0	.	0	0	.	.	.	0	0
chr4	40208294	40209295	-1	ENSMUSG00000040296	ENSMUST00000140616	Ddx58	FALSE	FALSE	FALSE	TRUE	.	0	0	.	0	0	.	.	.	0	0
chr4	40220099	40221100	-1	ENSMUSG00000040296	ENSMUST00000137903	Ddx58	FALSE	FALSE	FALSE	TRUE	.	0	0	.	0	0	.	.	.	0	0
chr4	40227855	40228856	-1	ENSMUSG00000040296	ENSMUST00000139110	Ddx58	FALSE	FALSE	FALSE	TRUE	.	0	0	.	0	0	.	.	.	0	0
chr4	40239327	40240328	-1	ENSMUSG00000040296	ENSMUST00000037907	Ddx58	FALSE	TRUE	FALSE	FALSE	.	0	0	chr4	40239470	40240138	element_276	Active Enhancer	.	0	0
chr4	40239199	40240200	-1	ENSMUSG00000040296	ENSMUST00000142055	Ddx58	FALSE	TRUE	FALSE	FALSE	.	0	0	chr4	40239470	40240138	element_276	Active Enhancer	.	0	0
chr4	40239221	40240222	-1	ENSMUSG00000040296	ENSMUST00000127026	Ddx58	FALSE	TRUE	FALSE	FALSE	.	0	0	chr4	40239470	40240138	element_276	Active Enhancer	.	0	0
chr4	40208042	40209043	-1	ENSMUSG00000040296	ENSMUST00000136435	Ddx58	FALSE	FALSE	FALSE	TRUE	.	0	0	.	0	0	.	.	.	0	0
chr4	40239254	40240255	-1	ENSMUSG00000040296	ENSMUST00000139583	Ddx58	FALSE	TRUE	FALSE	FALSE	.	0	0	chr4	40239470	40240138	element_276	Active Enhancer	.	0	0
chr4	40239324	40240325	-1	ENSMUSG00000040296	ENSMUST00000149539	Ddx58	FALSE	TRUE	FALSE	FALSE	.	0	0	chr4	40239470	40240138	element_276	Active Enhancer	.	0	0
chr5	139907974	139908975	1	ENSMUSG00000048988	ENSMUST00000198608	Elfn1	FALSE	FALSE	FALSE	TRUE	.	0	0	.	0	0	.	.	.	0	0
chr5	139907443	139908444	1	ENSMUSG00000048988	ENSMUST00000050519	Elfn1	FALSE	FALSE	FALSE	TRUE	.	0	0	.	0	0	.	.	.	0	0
chr5	24685324	24686325	1	ENSMUSG00000028954	ENSMUST00000068825	Nub1	FALSE	FALSE	FALSE	TRUE	.	0	0	.	0	0	.	.	.	0	0
chr5	24685487	24686488	1	ENSMUSG00000028954	ENSMUST00000200337	Nub1	FALSE	FALSE	FALSE	TRUE	.	0	0	.	0	0	.	.	.	0	0
chr5	24685032	24686033	1	ENSMUSG00000028954	ENSMUST00000197407	Nub1	FALSE	FALSE	FALSE	TRUE	.	0	0	.	0	0	.	.	.	0	0
chr5	120812135	120813136	1	ENSMUSG00000029605	ENSMUST00000086377	Oas1b	FALSE	TRUE	FALSE	FALSE	.	0	0	chr5	120812345	120812955	element_293	Active Enhancer	.	0	0
chr5	120812135	120813136	1	ENSMUSG00000029605	ENSMUST00000182725	Oas1b	FALSE	TRUE	FALSE	FALSE	.	0	0	chr5	120812345	120812955	element_293	Active Enhancer	.	0	0
chr5	120812138	120813139	1	ENSMUSG00000029605	ENSMUST00000183291	Oas1b	FALSE	TRUE	FALSE	FALSE	.	0	0	chr5	120812345	120812955	element_293	Active Enhancer	.	0	0
chr5	120914036	120915037	1	ENSMUSG00000032623	ENSMUST00000044224	Oas1d	FALSE	FALSE	FALSE	TRUE	.	0	0	.	0	0	.	.	.	0	0
chr5	114896436	114897437	1	ENSMUSG00000029561	ENSMUST00000031542	Oasl2	FALSE	TRUE	FALSE	FALSE	.	0	0	chr5	114897217	114897766	element_290	Poised	.	0	0
chr5	114896501	114897502	1	ENSMUSG00000029561	ENSMUST00000146072	Oasl2	FALSE	TRUE	FALSE	FALSE	.	0	0	chr5	114897217	114897766	element_290	Poised	.	0	0
chr5	114900853	114901854	1	ENSMUSG00000029561	ENSMUST00000124716	Oasl2	FALSE	FALSE	FALSE	TRUE	.	0	0	.	0	0	.	.	.	0	0
chr5	114903930	114904931	1	ENSMUSG00000029561	ENSMUST00000129707	Oasl2	FALSE	FALSE	FALSE	TRUE	.	0	0	.	0	0	.	.	.	0	0
chr5	114897076	114898077	1	ENSMUSG00000029561	ENSMUST00000137828	Oasl2	FALSE	TRUE	FALSE	FALSE	.	0	0	chr5	114897217	114897766	element_290	Poised	.	0	0
chr5	114896530	114897531	1	ENSMUSG00000029561	ENSMUST00000150361	Oasl2	FALSE	TRUE	FALSE	FALSE	.	0	0	chr5	114897217	114897766	element_290	Poised	.	0	0
chr5	114901334	114902335	1	ENSMUSG00000029561	ENSMUST00000201445	Oasl2	FALSE	FALSE	FALSE	TRUE	.	0	0	.	0	0	.	.	.	0	0
chr5	114897032	114898033	1	ENSMUSG00000029561	ENSMUST00000201919	Oasl2	FALSE	TRUE	FALSE	FALSE	.	0	0	chr5	114897217	114897766	element_290	Poised	.	0	0
chr5	114897242	114898243	1	ENSMUSG00000029561	ENSMUST00000144064	Oasl2	FALSE	TRUE	FALSE	FALSE	.	0	0	chr5	114897217	114897766	element_290	Poised	.	0	0
chr5	114935525	114936526	1	ENSMUSG00000041827	ENSMUST00000155274	Oasl1	FALSE	FALSE	FALSE	TRUE	.	0	0	.	0	0	.	.	.	0	0
chr5	114922935	114923936	1	ENSMUSG00000041827	ENSMUST00000140159	Oasl1	FALSE	FALSE	FALSE	TRUE	.	0	0	.	0	0	.	.	.	0	0
chr5	114922740	114923741	1	ENSMUSG00000041827	ENSMUST00000031540	Oasl1	FALSE	FALSE	FALSE	TRUE	.	0	0	.	0	0	.	.	.	0	0
chr5	114929349	114930350	1	ENSMUSG00000041827	ENSMUST00000152329	Oasl1	FALSE	FALSE	FALSE	TRUE	.	0	0	.	0	0	.	.	.	0	0
chr5	114922922	114923923	1	ENSMUSG00000041827	ENSMUST00000155394	Oasl1	FALSE	FALSE	FALSE	TRUE	.	0	0	.	0	0	.	.	.	0	0
chr5	114922764	114923765	1	ENSMUSG00000041827	ENSMUST00000112143	Oasl1	FALSE	FALSE	FALSE	TRUE	.	0	0	.	0	0	.	.	.	0	0
chr5	120811987	120812988	-1	ENSMUSG00000001166	ENSMUST00000125547	Oas1c	FALSE	TRUE	FALSE	FALSE	.	0	0	chr5	120812345	120812955	element_293	Active Enhancer	.	0	0
chr5	120812013	120813014	-1	ENSMUSG00000001166	ENSMUST00000130045	Oas1c	FALSE	TRUE	FALSE	FALSE	.	0	0	chr5	120812345	120812955	element_293	Active Enhancer	.	0	0
chr5	120812013	120813014	-1	ENSMUSG00000001166	ENSMUST00000117193	Oas1c	FALSE	TRUE	FALSE	FALSE	.	0	0	chr5	120812345	120812955	element_293	Active Enhancer	.	0	0
chr5	92348381	92349382	-1	ENSMUSG00000034855	ENSMUST00000038816	Cxcl10	FALSE	FALSE	FALSE	TRUE	.	0	0	.	0	0	.	.	.	0	0
chr5	92348381	92349382	-1	ENSMUSG00000034855	ENSMUST00000138169	Cxcl10	FALSE	FALSE	FALSE	TRUE	.	0	0	.	0	0	.	.	.	0	0
chr5	92348388	92349389	-1	ENSMUSG00000034855	ENSMUST00000118006	Cxcl10	FALSE	FALSE	FALSE	TRUE	.	0	0	.	0	0	.	.	.	0	0
chr5	92348366	92349367	-1	ENSMUSG00000034855	ENSMUST00000201176	Cxcl10	FALSE	FALSE	FALSE	TRUE	.	0	0	.	0	0	.	.	.	0	0
chr5	120879102	120880103	-1	ENSMUSG00000066861	ENSMUST00000161809	Oas1g	FALSE	FALSE	FALSE	TRUE	.	0	0	.	0	0	.	.	.	0	0
chr5	120887081	120888082	-1	ENSMUSG00000066861	ENSMUST00000086368	Oas1g	FALSE	TRUE	FALSE	FALSE	.	0	0	chr5	120887521	120887795	element_294	Active Enhancer	.	0	0
chr5	120887112	120888113	-1	ENSMUSG00000066861	ENSMUST00000162096	Oas1g	FALSE	TRUE	FALSE	FALSE	.	0	0	chr5	120887521	120887795	element_294	Active Enhancer	.	0	0
chr5	120907020	120908021	-1	ENSMUSG00000052776	ENSMUST00000080322	Oas1a	FALSE	TRUE	FALSE	FALSE	.	0	0	chr5	120907436	120907800	element_295	Bivalent	.	0	0
chr5	105139038	105140039	-1	ENSMUSG00000029298	ENSMUST00000100961	Gbp9	FALSE	FALSE	FALSE	TRUE	.	0	0	.	0	0	.	.	.	0	0
chr5	105082262	105083263	-1	ENSMUSG00000029298	ENSMUST00000199453	Gbp9	FALSE	FALSE	FALSE	TRUE	.	0	0	.	0	0	.	.	.	0	0
chr5	105109775	105110776	-1	ENSMUSG00000029298	ENSMUST00000031238	Gbp9	FALSE	FALSE	FALSE	TRUE	.	0	0	.	0	0	.	.	.	0	0
chr5	105109776	105110777	-1	ENSMUSG00000029298	ENSMUST00000196820	Gbp9	FALSE	FALSE	FALSE	TRUE	.	0	0	.	0	0	.	.	.	0	0
chr5	105139085	105140086	-1	ENSMUSG00000079363	ENSMUST00000196204	Gbp4	FALSE	FALSE	FALSE	TRUE	.	0	0	.	0	0	.	.	.	0	0
chr5	105139039	105140040	-1	ENSMUSG00000079363	ENSMUST00000197799	Gbp4	FALSE	FALSE	FALSE	TRUE	.	0	0	.	0	0	.	.	.	0	0
chr5	105139044	105140045	-1	ENSMUSG00000079363	ENSMUST00000196677	Gbp4	FALSE	FALSE	FALSE	TRUE	.	0	0	.	0	0	.	.	.	0	0
chr5	105139043	105140044	-1	ENSMUSG00000079363	ENSMUST00000199629	Gbp4	FALSE	FALSE	FALSE	TRUE	.	0	0	.	0	0	.	.	.	0	0
chr5	105139050	105140051	-1	ENSMUSG00000079363	ENSMUST00000198278	Gbp4	FALSE	FALSE	FALSE	TRUE	.	0	0	.	0	0	.	.	.	0	0
chr5	105139085	105140086	-1	ENSMUSG00000079363	ENSMUST00000100962	Gbp4	FALSE	FALSE	FALSE	TRUE	.	0	0	.	0	0	.	.	.	0	0
chr5	120777160	120778161	-1	ENSMUSG00000032661	ENSMUST00000044833	Oas3	FALSE	FALSE	TRUE	FALSE	.	0	0	.	0	0	.	.	chr5	120777590	120777815
chr5	120757154	120758155	-1	ENSMUSG00000032661	ENSMUST00000200795	Oas3	FALSE	FALSE	FALSE	TRUE	.	0	0	.	0	0	.	.	.	0	0
chr5	120777139	120778140	-1	ENSMUSG00000032661	ENSMUST00000166703	Oas3	FALSE	FALSE	TRUE	FALSE	.	0	0	.	0	0	.	.	chr5	120777590	120777815
chr5	120755758	120756759	-1	ENSMUSG00000032661	ENSMUST00000165820	Oas3	FALSE	FALSE	FALSE	TRUE	.	0	0	.	0	0	.	.	.	0	0
chr5	120749352	120750353	-1	ENSMUSG00000032690	ENSMUST00000081491	Oas2	FALSE	TRUE	FALSE	FALSE	.	0	0	chr5	120749487	120750276	element_291	Poised	.	0	0
chr5	120735074	120736075	-1	ENSMUSG00000032690	ENSMUST00000147941	Oas2	FALSE	FALSE	FALSE	TRUE	.	0	0	.	0	0	.	.	.	0	0
chr5	120749352	120750353	-1	ENSMUSG00000032690	ENSMUST00000053909	Oas2	FALSE	TRUE	FALSE	FALSE	.	0	0	chr5	120749487	120750276	element_291	Poised	.	0	0
chr5	120737907	120738908	-1	ENSMUSG00000032690	ENSMUST00000146101	Oas2	FALSE	FALSE	FALSE	TRUE	.	0	0	.	0	0	.	.	.	0	0
chr5	114922776	114923777	-1	ENSMUSG00000087477	ENSMUST00000127563	Gm13822	FALSE	FALSE	FALSE	TRUE	.	0	0	.	0	0	.	.	.	0	0
chr5	137115708	137116709	-1	ENSMUSG00000043279	ENSMUST00000152207	Trim56	FALSE	TRUE	FALSE	FALSE	.	0	0	chr5	137116002	137116480	element_299	Active Enhancer	.	0	0
chr5	137115706	137116707	-1	ENSMUSG00000043279	ENSMUST00000054384	Trim56	FALSE	TRUE	FALSE	FALSE	.	0	0	chr5	137116002	137116480	element_299	Active Enhancer	.	0	0
chr6	129180115	129181116	1	ENSMUSG00000030157	ENSMUST00000032260	Clec2d	FALSE	TRUE	FALSE	FALSE	.	0	0	chr6	129180392	129180545	element_318	Active Enhancer	.	0	0
chr6	57606011	57607012	1	ENSMUSG00000029798	ENSMUST00000203506	Herc6	FALSE	FALSE	FALSE	TRUE	.	0	0	.	0	0	.	.	.	0	0
chr6	57606933	57607934	1	ENSMUSG00000029798	ENSMUST00000204843	Herc6	FALSE	FALSE	FALSE	TRUE	.	0	0	.	0	0	.	.	.	0	0
chr6	57610326	57611327	1	ENSMUSG00000029798	ENSMUST00000204166	Herc6	FALSE	FALSE	FALSE	TRUE	.	0	0	.	0	0	.	.	.	0	0
chr6	57580500	57581501	1	ENSMUSG00000029798	ENSMUST00000031817	Herc6	FALSE	FALSE	FALSE	TRUE	.	0	0	.	0	0	.	.	.	0	0
chr6	57580508	57581509	1	ENSMUSG00000029798	ENSMUST00000203840	Herc6	FALSE	FALSE	FALSE	TRUE	.	0	0	.	0	0	.	.	.	0	0
chr6	57603573	57604574	1	ENSMUSG00000029798	ENSMUST00000204455	Herc6	FALSE	FALSE	FALSE	TRUE	.	0	0	.	0	0	.	.	.	0	0
chr6	39117973	39118974	1	ENSMUSG00000073144	ENSMUST00000146981	4930599N23Rik	FALSE	TRUE	FALSE	FALSE	.	0	0	chr6	39117862	39118676	element_327	Bivalent	.	0	0
chr6	79031544	79032545	1	ENSMUSG00000108072	ENSMUST00000204808	Gm20362	FALSE	FALSE	FALSE	TRUE	.	0	0	.	0	0	.	.	.	0	0
chr6	121253300	121254301	1	ENSMUSG00000030107	ENSMUST00000203250	Usp18	FALSE	FALSE	FALSE	TRUE	.	0	0	.	0	0	.	.	.	0	0
chr6	121245406	121246407	1	ENSMUSG00000030107	ENSMUST00000032198	Usp18	FALSE	TRUE	FALSE	FALSE	.	0	0	chr6	121245570	121246062	element_314	Poised	.	0	0
chr6	121268049	121269050	1	ENSMUSG00000030107	ENSMUST00000204710	Usp18	FALSE	FALSE	FALSE	TRUE	.	0	0	.	0	0	.	.	.	0	0
chr6	121260909	121261910	1	ENSMUSG00000030107	ENSMUST00000204926	Usp18	FALSE	FALSE	FALSE	TRUE	.	0	0	.	0	0	.	.	.	0	0
chr6	63783566	63784567	-1	ENSMUSG00000108068	ENSMUST00000204208	Gm44075	FALSE	FALSE	FALSE	TRUE	.	0	0	.	0	0	.	.	.	0	0
chr6	127150559	127151560	-1	ENSMUSG00000000184	ENSMUST00000000188	Ccnd2	FALSE	FALSE	FALSE	TRUE	.	0	0	.	0	0	.	.	.	0	0
chr6	127146187	127147188	-1	ENSMUSG00000000184	ENSMUST00000201985	Ccnd2	FALSE	FALSE	FALSE	TRUE	.	0	0	.	0	0	.	.	.	0	0
chr6	127138651	127139652	-1	ENSMUSG00000000184	ENSMUST00000201564	Ccnd2	FALSE	FALSE	FALSE	TRUE	.	0	0	.	0	0	.	.	.	0	0
chr6	127150532	127151533	-1	ENSMUSG00000000184	ENSMUST00000201066	Ccnd2	FALSE	FALSE	FALSE	TRUE	.	0	0	.	0	0	.	.	.	0	0
chr6	127150506	127151507	-1	ENSMUSG00000000184	ENSMUST00000202363	Ccnd2	FALSE	FALSE	FALSE	TRUE	.	0	0	.	0	0	.	.	.	0	0
chr6	127151692	127152693	-1	ENSMUSG00000000184	ENSMUST00000201902	Ccnd2	FALSE	FALSE	FALSE	TRUE	.	0	0	.	0	0	.	.	.	0	0
chr6	127150506	127151507	-1	ENSMUSG00000000184	ENSMUST00000201637	Ccnd2	FALSE	FALSE	FALSE	TRUE	.	0	0	.	0	0	.	.	.	0	0
chr6	127150460	127151461	-1	ENSMUSG00000000184	ENSMUST00000201857	Ccnd2	FALSE	FALSE	FALSE	TRUE	.	0	0	.	0	0	.	.	.	0	0
chr6	122601828	122602829	-1	ENSMUSG00000040613	ENSMUST00000203197	Apobec1	FALSE	FALSE	FALSE	TRUE	.	0	0	.	0	0	.	.	.	0	0
chr6	122599626	122600627	-1	ENSMUSG00000040613	ENSMUST00000112587	Apobec1	FALSE	FALSE	FALSE	TRUE	.	0	0	.	0	0	.	.	.	0	0
chr6	122599857	122600858	-1	ENSMUSG00000040613	ENSMUST00000203204	Apobec1	FALSE	FALSE	FALSE	TRUE	.	0	0	.	0	0	.	.	.	0	0
chr6	122601886	122602887	-1	ENSMUSG00000040613	ENSMUST00000203309	Apobec1	FALSE	FALSE	FALSE	TRUE	.	0	0	.	0	0	.	.	.	0	0
chr6	122601943	122602944	-1	ENSMUSG00000040613	ENSMUST00000112586	Apobec1	FALSE	FALSE	FALSE	TRUE	.	0	0	.	0	0	.	.	.	0	0
chr6	122601870	122602871	-1	ENSMUSG00000040613	ENSMUST00000112585	Apobec1	FALSE	FALSE	FALSE	TRUE	.	0	0	.	0	0	.	.	.	0	0
chr6	122601863	122602864	-1	ENSMUSG00000040613	ENSMUST00000143356	Apobec1	FALSE	FALSE	FALSE	TRUE	.	0	0	.	0	0	.	.	.	0	0
chr6	122599937	122600938	-1	ENSMUSG00000040613	ENSMUST00000204035	Apobec1	FALSE	FALSE	FALSE	TRUE	.	0	0	.	0	0	.	.	.	0	0
chr6	122601869	122602870	-1	ENSMUSG00000040613	ENSMUST00000147760	Apobec1	FALSE	FALSE	FALSE	TRUE	.	0	0	.	0	0	.	.	.	0	0
chr6	39090592	39091593	-1	ENSMUSG00000038507	ENSMUST00000129916	Parp12	FALSE	FALSE	FALSE	TRUE	.	0	0	.	0	0	.	.	.	0	0
chr6	39117848	39118849	-1	ENSMUSG00000038507	ENSMUST00000038398	Parp12	FALSE	TRUE	FALSE	FALSE	.	0	0	chr6	39117862	39118676	element_327	Bivalent	.	0	0
chr6	38353772	38354773	-1	ENSMUSG00000029826	ENSMUST00000114900	Zc3hav1	FALSE	TRUE	FALSE	FALSE	.	0	0	chr6	38354016	38354603	element_326	Active Promoter	.	0	0
chr6	38354102	38355103	-1	ENSMUSG00000029826	ENSMUST00000114898	Zc3hav1	FALSE	TRUE	FALSE	FALSE	.	0	0	chr6	38354016	38354603	element_326	Active Promoter	.	0	0
chr6	38353772	38354773	-1	ENSMUSG00000029826	ENSMUST00000143702	Zc3hav1	FALSE	TRUE	FALSE	FALSE	.	0	0	chr6	38354016	38354603	element_326	Active Promoter	.	0	0
chr6	38354102	38355103	-1	ENSMUSG00000029826	ENSMUST00000031850	Zc3hav1	FALSE	TRUE	FALSE	FALSE	.	0	0	chr6	38354016	38354603	element_326	Active Promoter	.	0	0
chr6	53820329	53821330	-1	ENSMUSG00000043496	ENSMUST00000127748	Tril	FALSE	FALSE	FALSE	TRUE	.	0	0	.	0	0	.	.	.	0	0
chr6	3338853	3339854	-1	ENSMUSG00000107215	ENSMUST00000201493	Gm43197	FALSE	FALSE	FALSE	TRUE	.	0	0	.	0	0	.	.	.	0	0
chr6	3345596	3346597	-1	ENSMUSG00000106734	ENSMUST00000201032	Gm20559	FALSE	FALSE	FALSE	TRUE	.	0	0	.	0	0	.	.	.	0	0
chr6	3345627	3346628	-1	ENSMUSG00000106734	ENSMUST00000202544	Gm20559	FALSE	FALSE	FALSE	TRUE	.	0	0	.	0	0	.	.	.	0	0
chr6	3345549	3346550	-1	ENSMUSG00000106734	ENSMUST00000201976	Gm20559	FALSE	FALSE	FALSE	TRUE	.	0	0	.	0	0	.	.	.	0	0
chr6	3345597	3346598	-1	ENSMUSG00000106734	ENSMUST00000202514	Gm20559	FALSE	FALSE	FALSE	TRUE	.	0	0	.	0	0	.	.	.	0	0
chr6	3345570	3346571	-1	ENSMUSG00000106734	ENSMUST00000201831	Gm20559	FALSE	FALSE	FALSE	TRUE	.	0	0	.	0	0	.	.	.	0	0
chr6	3345557	3346558	-1	ENSMUSG00000106734	ENSMUST00000202696	Gm20559	FALSE	FALSE	FALSE	TRUE	.	0	0	.	0	0	.	.	.	0	0
chr6	3399071	3400072	-1	ENSMUSG00000047735	ENSMUST00000120087	Samd9l	FALSE	TRUE	FALSE	FALSE	.	0	0	chr6	3399395	3399608	element_324	Poised	.	0	0
chr6	3384505	3385506	-1	ENSMUSG00000047735	ENSMUST00000201638	Samd9l	FALSE	FALSE	FALSE	TRUE	.	0	0	.	0	0	.	.	.	0	0
chr7	81858520	81859521	1	ENSMUSG00000038623	ENSMUST00000124616	Tm6sf1	FALSE	FALSE	FALSE	TRUE	.	0	0	.	0	0	.	.	.	0	0
chr7	81858651	81859652	1	ENSMUSG00000038623	ENSMUST00000126334	Tm6sf1	FALSE	FALSE	FALSE	TRUE	.	0	0	.	0	0	.	.	.	0	0
chr7	81862187	81863188	1	ENSMUSG00000038623	ENSMUST00000119543	Tm6sf1	FALSE	FALSE	FALSE	TRUE	.	0	0	.	0	0	.	.	.	0	0
chr7	81858501	81859502	1	ENSMUSG00000038623	ENSMUST00000041890	Tm6sf1	FALSE	FALSE	FALSE	TRUE	.	0	0	.	0	0	.	.	.	0	0
chr7	81869233	81870234	1	ENSMUSG00000038623	ENSMUST00000147977	Tm6sf1	FALSE	FALSE	FALSE	TRUE	.	0	0	.	0	0	.	.	.	0	0
chr7	81858618	81859619	1	ENSMUSG00000038623	ENSMUST00000134861	Tm6sf1	FALSE	FALSE	FALSE	TRUE	.	0	0	.	0	0	.	.	.	0	0
chr7	81872993	81873994	1	ENSMUSG00000038623	ENSMUST00000130006	Tm6sf1	FALSE	FALSE	FALSE	TRUE	.	0	0	.	0	0	.	.	.	0	0
chr7	104328971	104329972	1	ENSMUSG00000090215	ENSMUST00000180136	Trim34b	FALSE	FALSE	FALSE	TRUE	.	0	0	.	0	0	.	.	.	0	0
chr7	104328971	104329972	1	ENSMUSG00000090215	ENSMUST00000106847	Trim34b	FALSE	FALSE	FALSE	TRUE	.	0	0	.	0	0	.	.	.	0	0
chr7	58655666	58656667	1	ENSMUSG00000025324	ENSMUST00000207668	Atp10a	FALSE	FALSE	FALSE	TRUE	.	0	0	.	0	0	.	.	.	0	0
chr7	58657746	58658747	1	ENSMUSG00000025324	ENSMUST00000168747	Atp10a	FALSE	FALSE	FALSE	TRUE	.	0	0	.	0	0	.	.	.	0	0
chr7	104243993	104244994	1	ENSMUSG00000056144	ENSMUST00000106848	Trim34a	TRUE	TRUE	FALSE	FALSE	chr7	104243735	104244074	chr7	104244233	104244757	element_337	Active Promoter	.	0	0
chr7	104243957	104244958	1	ENSMUSG00000056144	ENSMUST00000106849	Trim34a	TRUE	TRUE	FALSE	FALSE	chr7	104243735	104244074	chr7	104244233	104244757	element_337	Active Promoter	.	0	0
chr7	104243959	104244960	1	ENSMUSG00000056144	ENSMUST00000060315	Trim34a	TRUE	TRUE	FALSE	FALSE	chr7	104243735	104244074	chr7	104244233	104244757	element_337	Active Promoter	.	0	0
chr7	104220672	104221673	1	ENSMUSG00000072244	ENSMUST00000153324	Trim6	FALSE	FALSE	FALSE	TRUE	.	0	0	.	0	0	.	.	.	0	0
chr7	104218337	104219338	1	ENSMUSG00000072244	ENSMUST00000144455	Trim6	TRUE	FALSE	FALSE	FALSE	chr7	104218880	104219444	.	0	0	.	.	.	0	0
chr7	104218295	104219296	1	ENSMUSG00000072244	ENSMUST00000098180	Trim6	TRUE	FALSE	FALSE	FALSE	chr7	104218880	104219444	.	0	0	.	.	.	0	0
chr7	104218293	104219294	1	ENSMUSG00000072244	ENSMUST00000144538	Trim6	TRUE	FALSE	FALSE	FALSE	chr7	104218880	104219444	.	0	0	.	.	.	0	0
chr7	104225007	104226008	1	ENSMUSG00000072244	ENSMUST00000214578	Trim6	FALSE	FALSE	FALSE	TRUE	.	0	0	.	0	0	.	.	.	0	0
chr7	104218929	104219930	1	ENSMUSG00000072244	ENSMUST00000128493	Trim6	TRUE	FALSE	FALSE	FALSE	chr7	104218880	104219444	.	0	0	.	.	.	0	0
chr7	114793468	114794469	1	ENSMUSG00000048782	ENSMUST00000206274	Insc	FALSE	FALSE	FALSE	TRUE	.	0	0	.	0	0	.	.	.	0	0
chr7	114743194	114744195	1	ENSMUSG00000048782	ENSMUST00000161800	Insc	FALSE	FALSE	FALSE	TRUE	.	0	0	.	0	0	.	.	.	0	0
chr7	114745240	114746241	1	ENSMUSG00000048782	ENSMUST00000136645	Insc	FALSE	FALSE	FALSE	TRUE	.	0	0	.	0	0	.	.	.	0	0
chr7	114745266	114746267	1	ENSMUSG00000048782	ENSMUST00000169913	Insc	FALSE	FALSE	FALSE	TRUE	.	0	0	.	0	0	.	.	.	0	0
chr7	114791553	114792554	1	ENSMUSG00000048782	ENSMUST00000150991	Insc	FALSE	FALSE	FALSE	TRUE	.	0	0	.	0	0	.	.	.	0	0
chr7	114768236	114769237	1	ENSMUSG00000048782	ENSMUST00000117543	Insc	FALSE	FALSE	FALSE	TRUE	.	0	0	.	0	0	.	.	.	0	0
chr7	114770821	114771822	1	ENSMUSG00000048782	ENSMUST00000136347	Insc	FALSE	FALSE	FALSE	TRUE	.	0	0	.	0	0	.	.	.	0	0
chr7	114768274	114769275	1	ENSMUSG00000048782	ENSMUST00000151464	Insc	FALSE	FALSE	FALSE	TRUE	.	0	0	.	0	0	.	.	.	0	0
chr7	114753221	114754222	1	ENSMUSG00000048782	ENSMUST00000139670	Insc	FALSE	FALSE	FALSE	TRUE	.	0	0	.	0	0	.	.	.	0	0
chr7	78913481	78914482	1	ENSMUSG00000039236	ENSMUST00000133042	Isg20	FALSE	FALSE	FALSE	TRUE	.	0	0	.	0	0	.	.	.	0	0
chr7	78913735	78914736	1	ENSMUSG00000039236	ENSMUST00000120331	Isg20	FALSE	FALSE	FALSE	TRUE	.	0	0	.	0	0	.	.	.	0	0
chr7	78912958	78913959	1	ENSMUSG00000039236	ENSMUST00000121645	Isg20	FALSE	FALSE	FALSE	TRUE	.	0	0	.	0	0	.	.	.	0	0
chr7	78913265	78914266	1	ENSMUSG00000039236	ENSMUST00000038142	Isg20	FALSE	FALSE	FALSE	TRUE	.	0	0	.	0	0	.	.	.	0	0
chr7	78912924	78913925	1	ENSMUSG00000039236	ENSMUST00000118867	Isg20	FALSE	FALSE	FALSE	TRUE	.	0	0	.	0	0	.	.	.	0	0
chr7	78913829	78914830	1	ENSMUSG00000039236	ENSMUST00000205981	Isg20	FALSE	FALSE	FALSE	TRUE	.	0	0	.	0	0	.	.	.	0	0
chr7	141265518	141266519	-1	ENSMUSG00000025498	ENSMUST00000209899	Irf7	FALSE	TRUE	FALSE	FALSE	.	0	0	chr7	141265876	141266338	element_348	Poised	.	0	0
chr7	141265920	141266921	-1	ENSMUSG00000025498	ENSMUST00000106023	Irf7	FALSE	TRUE	FALSE	FALSE	.	0	0	chr7	141265876	141266338	element_348	Poised	.	0	0
chr7	141265920	141266921	-1	ENSMUSG00000025498	ENSMUST00000146373	Irf7	FALSE	TRUE	FALSE	FALSE	.	0	0	chr7	141265876	141266338	element_348	Poised	.	0	0
chr7	141265921	141266922	-1	ENSMUSG00000025498	ENSMUST00000155744	Irf7	FALSE	TRUE	FALSE	FALSE	.	0	0	chr7	141265876	141266338	element_348	Poised	.	0	0
chr7	141265922	141266923	-1	ENSMUSG00000025498	ENSMUST00000210506	Irf7	FALSE	TRUE	FALSE	FALSE	.	0	0	chr7	141265876	141266338	element_348	Poised	.	0	0
chr7	141265980	141266981	-1	ENSMUSG00000025498	ENSMUST00000026571	Irf7	FALSE	TRUE	FALSE	FALSE	.	0	0	chr7	141265876	141266338	element_348	Poised	.	0	0
chr7	141265922	141266923	-1	ENSMUSG00000025498	ENSMUST00000097952	Irf7	FALSE	TRUE	FALSE	FALSE	.	0	0	chr7	141265876	141266338	element_348	Poised	.	0	0
chr7	141265206	141266207	-1	ENSMUSG00000025498	ENSMUST00000156938	Irf7	FALSE	TRUE	FALSE	FALSE	.	0	0	chr7	141265876	141266338	element_348	Poised	.	0	0
chr7	141265543	141266544	-1	ENSMUSG00000025498	ENSMUST00000131399	Irf7	FALSE	TRUE	FALSE	FALSE	.	0	0	chr7	141265876	141266338	element_348	Poised	.	0	0
chr7	141264972	141265973	-1	ENSMUSG00000025498	ENSMUST00000148414	Irf7	FALSE	TRUE	FALSE	FALSE	.	0	0	chr7	141265876	141266338	element_348	Poised	.	0	0
chr7	141265483	141266484	-1	ENSMUSG00000025498	ENSMUST00000127161	Irf7	FALSE	TRUE	FALSE	FALSE	.	0	0	chr7	141265876	141266338	element_348	Poised	.	0	0
chr7	141264630	141265631	-1	ENSMUSG00000025498	ENSMUST00000127223	Irf7	FALSE	FALSE	FALSE	TRUE	.	0	0	.	0	0	.	.	.	0	0
chr7	141264791	141265792	-1	ENSMUSG00000025498	ENSMUST00000123525	Irf7	FALSE	FALSE	FALSE	TRUE	.	0	0	.	0	0	.	.	.	0	0
chr7	104352837	104353838	-1	ENSMUSG00000057143	ENSMUST00000130139	Trim12c	FALSE	TRUE	FALSE	FALSE	.	0	0	chr7	104353012	104353556	element_338	Active Promoter	.	0	0
chr7	104352861	104353862	-1	ENSMUSG00000057143	ENSMUST00000059037	Trim12c	FALSE	TRUE	FALSE	FALSE	.	0	0	chr7	104353012	104353556	element_338	Active Promoter	.	0	0
chr7	104411766	104412767	-1	ENSMUSG00000030921	ENSMUST00000142124	Trim30a	FALSE	FALSE	FALSE	TRUE	.	0	0	.	0	0	.	.	.	0	0
chr7	104416427	104417428	-1	ENSMUSG00000030921	ENSMUST00000125762	Trim30a	FALSE	FALSE	FALSE	TRUE	.	0	0	.	0	0	.	.	.	0	0
chr7	104464692	104465693	-1	ENSMUSG00000030921	ENSMUST00000076922	Trim30a	FALSE	TRUE	FALSE	FALSE	.	0	0	chr7	104464960	104465396	element_340	Poised	.	0	0
chr7	104507348	104508349	-1	ENSMUSG00000057596	ENSMUST00000071069	Trim30d	FALSE	FALSE	FALSE	TRUE	.	0	0	.	0	0	.	.	.	0	0
chr7	104507324	104508325	-1	ENSMUSG00000057596	ENSMUST00000033211	Trim30d	FALSE	FALSE	FALSE	TRUE	.	0	0	.	0	0	.	.	.	0	0
chr7	104482925	104483926	-1	ENSMUSG00000057596	ENSMUST00000141063	Trim30d	FALSE	FALSE	FALSE	TRUE	.	0	0	.	0	0	.	.	.	0	0
chr7	104534350	104535351	-1	ENSMUSG00000073929	ENSMUST00000151294	Trim30e-ps1	FALSE	FALSE	FALSE	TRUE	.	0	0	.	0	0	.	.	.	0	0
chr7	104534860	104535861	-1	ENSMUSG00000073929	ENSMUST00000147064	Trim30e-ps1	FALSE	FALSE	FALSE	TRUE	.	0	0	.	0	0	.	.	.	0	0
chr7	141010269	141011270	-1	ENSMUSG00000025492	ENSMUST00000026565	Ifitm3	FALSE	TRUE	FALSE	FALSE	.	0	0	chr7	141010511	141010910	element_347	Bivalent	.	0	0
chr7	102564944	102565945	-1	ENSMUSG00000030966	ENSMUST00000106913	Trim21	FALSE	TRUE	FALSE	FALSE	.	0	0	chr7	102565306	102565617	element_336	Active Enhancer	.	0	0
chr7	102563335	102564336	-1	ENSMUSG00000030966	ENSMUST00000209679	Trim21	FALSE	FALSE	FALSE	TRUE	.	0	0	.	0	0	.	.	.	0	0
chr7	102564985	102565986	-1	ENSMUSG00000030966	ENSMUST00000033264	Trim21	FALSE	TRUE	FALSE	FALSE	.	0	0	chr7	102565306	102565617	element_336	Active Enhancer	.	0	0
chr7	102563589	102564590	-1	ENSMUSG00000030966	ENSMUST00000209907	Trim21	FALSE	FALSE	FALSE	TRUE	.	0	0	.	0	0	element_336	Active Enhancer	.	0	0
chr7	102564945	102565946	-1	ENSMUSG00000030966	ENSMUST00000210261	Trim21	FALSE	TRUE	FALSE	FALSE	.	0	0	chr7	102565306	102565617	element_336	Active Enhancer	.	0	0
chr8	61927587	61928588	1	ENSMUSG00000037921	ENSMUST00000154398	Ddx60	FALSE	TRUE	FALSE	FALSE	.	0	0	chr8	61927748	61928470	element_362	Bivalent	.	0	0
chr8	61927589	61928590	1	ENSMUSG00000037921	ENSMUST00000093485	Ddx60	FALSE	TRUE	FALSE	FALSE	.	0	0	chr8	61927748	61928470	element_362	Bivalent	.	0	0
chr8	61983638	61984639	1	ENSMUSG00000037921	ENSMUST00000153806	Ddx60	FALSE	FALSE	FALSE	TRUE	.	0	0	.	0	0	.	.	.	0	0
chr8	61927589	61928590	1	ENSMUSG00000037921	ENSMUST00000156980	Ddx60	FALSE	TRUE	FALSE	FALSE	.	0	0	chr8	61927748	61928470	element_362	Bivalent	.	0	0
chr8	61927589	61928590	1	ENSMUSG00000037921	ENSMUST00000070631	Ddx60	FALSE	TRUE	FALSE	FALSE	.	0	0	chr8	61927748	61928470	element_362	Bivalent	.	0	0
chr8	62020560	62021561	1	ENSMUSG00000037921	ENSMUST00000136121	Ddx60	FALSE	FALSE	FALSE	TRUE	.	0	0	.	0	0	.	.	.	0	0
chr8	72189138	72190139	1	ENSMUSG00000062007	ENSMUST00000072097	Hsh2d	FALSE	TRUE	FALSE	FALSE	.	0	0	chr8	72189490	72189843	element_365	Poised	.	0	0
chr8	72192943	72193944	1	ENSMUSG00000062007	ENSMUST00000165324	Hsh2d	FALSE	FALSE	FALSE	TRUE	.	0	0	.	0	0	.	.	.	0	0
chr8	94433856	94434857	1	ENSMUSG00000074151	ENSMUST00000212382	Nlrc5	TRUE	FALSE	FALSE	FALSE	chr8	94434149	94434502	.	0	0	.	.	.	0	0
chr8	94469510	94470511	1	ENSMUSG00000074151	ENSMUST00000182409	Nlrc5	FALSE	FALSE	FALSE	TRUE	.	0	0	.	0	0	.	.	.	0	0
chr8	94433891	94434892	1	ENSMUSG00000074151	ENSMUST00000211816	Nlrc5	TRUE	FALSE	FALSE	FALSE	chr8	94434149	94434502	.	0	0	.	.	.	0	0
chr8	94472263	94473264	1	ENSMUSG00000074151	ENSMUST00000053085	Nlrc5	FALSE	FALSE	FALSE	TRUE	.	0	0	.	0	0	.	.	.	0	0
chr8	94524567	94525568	1	ENSMUSG00000074151	ENSMUST00000098489	Nlrc5	FALSE	FALSE	FALSE	TRUE	.	0	0	.	0	0	.	.	.	0	0
chr8	94481539	94482540	1	ENSMUSG00000074151	ENSMUST00000183132	Nlrc5	FALSE	FALSE	FALSE	TRUE	.	0	0	.	0	0	.	.	.	0	0
chr8	94433901	94434902	1	ENSMUSG00000074151	ENSMUST00000212220	Nlrc5	TRUE	FALSE	FALSE	FALSE	chr8	94434149	94434502	.	0	0	.	.	.	0	0
chr8	94524567	94525568	1	ENSMUSG00000074151	ENSMUST00000137032	Nlrc5	FALSE	FALSE	FALSE	TRUE	.	0	0	.	0	0	.	.	.	0	0
chr8	94520931	94521932	1	ENSMUSG00000074151	ENSMUST00000183287	Nlrc5	FALSE	FALSE	FALSE	TRUE	.	0	0	.	0	0	.	.	.	0	0
chr8	105936537	105937538	-1	ENSMUSG00000031897	ENSMUST00000212686	Psmb10	FALSE	FALSE	FALSE	TRUE	.	0	0	.	0	0	.	.	.	0	0
chr8	105936524	105937525	-1	ENSMUSG00000031897	ENSMUST00000212332	Psmb10	FALSE	FALSE	FALSE	TRUE	.	0	0	.	0	0	.	.	.	0	0
chr8	105937591	105938592	-1	ENSMUSG00000031897	ENSMUST00000212044	Psmb10	FALSE	FALSE	FALSE	TRUE	.	0	0	.	0	0	.	.	.	0	0
chr8	105937603	105938604	-1	ENSMUSG00000031897	ENSMUST00000212595	Psmb10	FALSE	FALSE	FALSE	TRUE	.	0	0	.	0	0	.	.	.	0	0
chr8	105937943	105938944	-1	ENSMUSG00000031897	ENSMUST00000034369	Psmb10	FALSE	FALSE	FALSE	TRUE	.	0	0	.	0	0	.	.	.	0	0
chr8	105937164	105938165	-1	ENSMUSG00000031897	ENSMUST00000212876	Psmb10	FALSE	FALSE	FALSE	TRUE	.	0	0	.	0	0	.	.	.	0	0
chr8	105936526	105937527	-1	ENSMUSG00000031897	ENSMUST00000212938	Psmb10	FALSE	FALSE	FALSE	TRUE	.	0	0	.	0	0	.	.	.	0	0
chr8	65036835	65037836	-1	ENSMUSG00000079042	ENSMUST00000142822	Apela	FALSE	FALSE	FALSE	TRUE	.	0	0	.	0	0	.	.	.	0	0
chr8	65036671	65037672	-1	ENSMUSG00000079042	ENSMUST00000124790	Apela	FALSE	FALSE	FALSE	TRUE	.	0	0	.	0	0	.	.	.	0	0
chr8	111315618	111316619	-1	ENSMUSG00000012519	ENSMUST00000135710	Mlkl	FALSE	FALSE	FALSE	TRUE	.	0	0	.	0	0	.	.	.	0	0
chr8	111337292	111338293	-1	ENSMUSG00000012519	ENSMUST00000145862	Mlkl	FALSE	FALSE	FALSE	TRUE	.	0	0	.	0	0	.	.	.	0	0
chr8	111337676	111338677	-1	ENSMUSG00000012519	ENSMUST00000120432	Mlkl	FALSE	FALSE	FALSE	TRUE	.	0	0	.	0	0	.	.	.	0	0
chr8	111337676	111338677	-1	ENSMUSG00000012519	ENSMUST00000056157	Mlkl	FALSE	FALSE	FALSE	TRUE	.	0	0	.	0	0	.	.	.	0	0
chr8	61927498	61928499	-1	ENSMUSG00000109729	ENSMUST00000210376	Gm45418	FALSE	TRUE	FALSE	FALSE	.	0	0	chr8	61927748	61928470	element_362	Bivalent	.	0	0
chr8	61927527	61928528	-1	ENSMUSG00000109729	ENSMUST00000210693	Gm45418	FALSE	TRUE	FALSE	FALSE	.	0	0	chr8	61927748	61928470	element_362	Bivalent	.	0	0
chr8	71536955	71537956	-1	ENSMUSG00000046718	ENSMUST00000051672	Bst2	FALSE	TRUE	FALSE	FALSE	.	0	0	chr8	71537257	71538085	element_364	Active Enhancer	.	0	0
chr8	71536830	71537831	-1	ENSMUSG00000046718	ENSMUST00000212386	Bst2	FALSE	TRUE	FALSE	FALSE	.	0	0	chr8	71537257	71538085	element_364	Active Enhancer	.	0	0
chr8	84978217	84979218	-1	ENSMUSG00000052837	ENSMUST00000064922	Junb	FALSE	FALSE	FALSE	TRUE	.	0	0	.	0	0	.	.	.	0	0
chr8	84976041	84977042	-1	ENSMUSG00000052837	ENSMUST00000209372	Junb	TRUE	FALSE	FALSE	FALSE	chr8	84976369	84976769	.	0	0	.	.	.	0	0
chr8	45409876	45410877	-1	ENSMUSG00000031639	ENSMUST00000210354	Tlr3	FALSE	FALSE	FALSE	TRUE	.	0	0	.	0	0	.	.	.	0	0
chr8	45410579	45411580	-1	ENSMUSG00000031639	ENSMUST00000209269	Tlr3	FALSE	FALSE	FALSE	TRUE	.	0	0	.	0	0	.	.	.	0	0
chr8	45409879	45410880	-1	ENSMUSG00000031639	ENSMUST00000209772	Tlr3	FALSE	FALSE	FALSE	TRUE	.	0	0	.	0	0	.	.	.	0	0
chr8	45410117	45411118	-1	ENSMUSG00000031639	ENSMUST00000211370	Tlr3	FALSE	FALSE	FALSE	TRUE	.	0	0	.	0	0	.	.	.	0	0
chr8	45410057	45411058	-1	ENSMUSG00000031639	ENSMUST00000209651	Tlr3	FALSE	FALSE	FALSE	TRUE	.	0	0	.	0	0	.	.	.	0	0
chr8	45410118	45411119	-1	ENSMUSG00000031639	ENSMUST00000167106	Tlr3	FALSE	FALSE	FALSE	TRUE	.	0	0	.	0	0	.	.	.	0	0
chr8	45397785	45398786	-1	ENSMUSG00000031639	ENSMUST00000210013	Tlr3	FALSE	FALSE	FALSE	TRUE	.	0	0	.	0	0	.	.	.	0	0
chr8	45409875	45410876	-1	ENSMUSG00000031639	ENSMUST00000210996	Tlr3	FALSE	FALSE	FALSE	TRUE	.	0	0	.	0	0	.	.	.	0	0
chr8	45410118	45411119	-1	ENSMUSG00000031639	ENSMUST00000034056	Tlr3	FALSE	FALSE	FALSE	TRUE	.	0	0	.	0	0	.	.	.	0	0
chr9	107975075	107976076	1	ENSMUSG00000032596	ENSMUST00000075082	Uba7	FALSE	FALSE	TRUE	FALSE	.	0	0	.	0	0	.	.	chr9	107975456	107975632
chr9	107975005	107976006	1	ENSMUSG00000032596	ENSMUST00000176037	Uba7	FALSE	FALSE	TRUE	FALSE	.	0	0	.	0	0	.	.	chr9	107975456	107975632
chr9	107980390	107981391	1	ENSMUSG00000032596	ENSMUST00000177096	Uba7	FALSE	FALSE	FALSE	TRUE	.	0	0	.	0	0	.	.	.	0	0
chr9	107975155	107976156	1	ENSMUSG00000032596	ENSMUST00000177392	Uba7	FALSE	FALSE	TRUE	FALSE	.	0	0	.	0	0	.	.	chr9	107975456	107975632
chr9	107975070	107976071	1	ENSMUSG00000032596	ENSMUST00000176858	Uba7	FALSE	FALSE	TRUE	FALSE	.	0	0	.	0	0	.	.	chr9	107975456	107975632
chr9	107976391	107977392	1	ENSMUSG00000032596	ENSMUST00000176743	Uba7	FALSE	FALSE	FALSE	TRUE	.	0	0	.	0	0	.	.	.	0	0
chr9	107975808	107976809	1	ENSMUSG00000032596	ENSMUST00000175933	Uba7	FALSE	FALSE	FALSE	TRUE	.	0	0	.	0	0	.	.	.	0	0
chr9	107975106	107976107	1	ENSMUSG00000032596	ENSMUST00000177494	Uba7	FALSE	FALSE	TRUE	FALSE	.	0	0	.	0	0	.	.	chr9	107975456	107975632
chr9	107982525	107983526	1	ENSMUSG00000032596	ENSMUST00000177071	Uba7	FALSE	FALSE	FALSE	TRUE	.	0	0	.	0	0	.	.	.	0	0
chr9	107975082	107976083	1	ENSMUSG00000032596	ENSMUST00000176478	Uba7	FALSE	FALSE	TRUE	FALSE	.	0	0	.	0	0	.	.	chr9	107975456	107975632
chr9	107982535	107983536	1	ENSMUSG00000032596	ENSMUST00000176340	Uba7	FALSE	FALSE	FALSE	TRUE	.	0	0	.	0	0	.	.	.	0	0
chr9	107975106	107976107	1	ENSMUSG00000032596	ENSMUST00000176842	Uba7	FALSE	FALSE	TRUE	FALSE	.	0	0	.	0	0	.	.	chr9	107975456	107975632
chr9	107979239	107980240	1	ENSMUSG00000032596	ENSMUST00000176673	Uba7	FALSE	FALSE	FALSE	TRUE	.	0	0	.	0	0	.	.	.	0	0
chr9	107975034	107976035	1	ENSMUSG00000032596	ENSMUST00000035216	Uba7	FALSE	FALSE	TRUE	FALSE	.	0	0	.	0	0	.	.	chr9	107975456	107975632
chr9	107975456	107976457	1	ENSMUSG00000032596	ENSMUST00000177039	Uba7	FALSE	FALSE	TRUE	FALSE	.	0	0	.	0	0	.	.	chr9	107975456	107975632
chr9	109050659	109051660	1	ENSMUSG00000025647	ENSMUST00000200515	Shisa5	FALSE	FALSE	FALSE	TRUE	.	0	0	.	0	0	.	.	.	0	0
chr9	109050698	109051699	1	ENSMUSG00000025647	ENSMUST00000196954	Shisa5	FALSE	FALSE	FALSE	TRUE	.	0	0	.	0	0	.	.	.	0	0
chr9	109050655	109051656	1	ENSMUSG00000025647	ENSMUST00000200629	Shisa5	FALSE	FALSE	FALSE	TRUE	.	0	0	.	0	0	.	.	.	0	0
chr9	109055440	109056441	1	ENSMUSG00000025647	ENSMUST00000199288	Shisa5	FALSE	FALSE	FALSE	TRUE	.	0	0	.	0	0	.	.	.	0	0
chr9	109038065	109039066	1	ENSMUSG00000025647	ENSMUST00000112059	Shisa5	FALSE	FALSE	FALSE	TRUE	.	0	0	.	0	0	.	.	.	0	0
chr9	109040106	109041107	1	ENSMUSG00000025647	ENSMUST00000198281	Shisa5	FALSE	FALSE	FALSE	TRUE	.	0	0	.	0	0	.	.	.	0	0
chr9	109050596	109051597	1	ENSMUSG00000025647	ENSMUST00000198708	Shisa5	FALSE	FALSE	FALSE	TRUE	.	0	0	.	0	0	.	.	.	0	0
chr9	109050700	109051701	1	ENSMUSG00000025647	ENSMUST00000198376	Shisa5	FALSE	FALSE	FALSE	TRUE	.	0	0	.	0	0	.	.	.	0	0
chr9	109050702	109051703	1	ENSMUSG00000025647	ENSMUST00000197483	Shisa5	FALSE	FALSE	FALSE	TRUE	.	0	0	.	0	0	.	.	.	0	0
chr9	109050680	109051681	1	ENSMUSG00000025647	ENSMUST00000197689	Shisa5	FALSE	FALSE	FALSE	TRUE	.	0	0	.	0	0	.	.	.	0	0
chr9	109050935	109051936	1	ENSMUSG00000025647	ENSMUST00000199868	Shisa5	FALSE	FALSE	FALSE	TRUE	.	0	0	.	0	0	.	.	.	0	0
chr9	109054512	109055513	1	ENSMUSG00000025647	ENSMUST00000197194	Shisa5	FALSE	TRUE	FALSE	FALSE	.	0	0	chr9	109054744	109055026	element_372	Poised	.	0	0
chr9	109038102	109039103	1	ENSMUSG00000025647	ENSMUST00000198639	Shisa5	FALSE	FALSE	FALSE	TRUE	.	0	0	.	0	0	.	.	.	0	0
chr9	109050711	109051712	1	ENSMUSG00000025647	ENSMUST00000198295	Shisa5	FALSE	FALSE	FALSE	TRUE	.	0	0	.	0	0	.	.	.	0	0
chr9	109054448	109055449	1	ENSMUSG00000025647	ENSMUST00000200366	Shisa5	FALSE	TRUE	FALSE	FALSE	.	0	0	chr9	109054744	109055026	element_372	Poised	.	0	0
chr9	109038085	109039086	1	ENSMUSG00000025647	ENSMUST00000026737	Shisa5	FALSE	FALSE	FALSE	TRUE	.	0	0	.	0	0	.	.	.	0	0
chr9	109039916	109040917	1	ENSMUSG00000025647	ENSMUST00000197099	Shisa5	FALSE	FALSE	FALSE	TRUE	.	0	0	.	0	0	.	.	.	0	0
chr9	109054363	109055364	1	ENSMUSG00000025647	ENSMUST00000154184	Shisa5	FALSE	TRUE	FALSE	FALSE	.	0	0	chr9	109054744	109055026	element_372	Poised	.	0	0
chr9	109052354	109053355	1	ENSMUSG00000025647	ENSMUST00000198591	Shisa5	FALSE	FALSE	FALSE	TRUE	.	0	0	.	0	0	.	.	.	0	0
chr9	88355187	88356188	1	ENSMUSG00000032420	ENSMUST00000217134	Nt5e	FALSE	FALSE	FALSE	TRUE	.	0	0	.	0	0	.	.	.	0	0
chr9	88327118	88328119	1	ENSMUSG00000032420	ENSMUST00000186789	Nt5e	FALSE	FALSE	FALSE	TRUE	.	0	0	.	0	0	.	.	.	0	0
chr9	88327133	88328134	1	ENSMUSG00000032420	ENSMUST00000187166	Nt5e	FALSE	FALSE	FALSE	TRUE	.	0	0	.	0	0	.	.	.	0	0
chr9	88326697	88327698	1	ENSMUSG00000032420	ENSMUST00000034992	Nt5e	FALSE	FALSE	FALSE	TRUE	.	0	0	.	0	0	.	.	.	0	0
chr9	20870272	20871273	1	ENSMUSG00000038884	ENSMUST00000176990	A230050P20Rik	FALSE	FALSE	FALSE	TRUE	.	0	0	.	0	0	.	.	.	0	0
chr9	20868142	20869143	1	ENSMUSG00000038884	ENSMUST00000043911	A230050P20Rik	FALSE	TRUE	FALSE	FALSE	.	0	0	chr9	20868571	20868989	element_377	Active Enhancer	.	0	0
chr9	20868777	20869778	1	ENSMUSG00000038884	ENSMUST00000177067	A230050P20Rik	FALSE	TRUE	FALSE	FALSE	.	0	0	chr9	20868571	20868989	element_377	Active Enhancer	.	0	0
chr9	20868158	20869159	1	ENSMUSG00000038884	ENSMUST00000175820	A230050P20Rik	FALSE	TRUE	FALSE	FALSE	.	0	0	chr9	20868571	20868989	element_377	Active Enhancer	.	0	0
chr9	20868180	20869181	1	ENSMUSG00000038884	ENSMUST00000176142	A230050P20Rik	FALSE	TRUE	FALSE	FALSE	.	0	0	chr9	20868571	20868989	element_377	Active Enhancer	.	0	0
chr9	122310194	122311195	-1	ENSMUSG00000097572	ENSMUST00000213132	Gm26797	FALSE	TRUE	FALSE	FALSE	.	0	0	chr9	122310754	122311139	element_374	Poised	.	0	0
chr9	122308261	122309262	-1	ENSMUSG00000097572	ENSMUST00000216452	Gm26797	FALSE	FALSE	FALSE	TRUE	.	0	0	.	0	0	.	.	.	0	0
chr9	122310427	122311428	-1	ENSMUSG00000097572	ENSMUST00000180685	Gm26797	FALSE	TRUE	FALSE	FALSE	.	0	0	chr9	122310754	122311139	element_374	Poised	.	0	0
chr9	85326847	85327848	-1	ENSMUSG00000032265	ENSMUST00000187711	Fam46a	FALSE	FALSE	FALSE	TRUE	.	0	0	.	0	0	.	.	.	0	0
chr9	85326623	85327624	-1	ENSMUSG00000032265	ENSMUST00000034802	Fam46a	FALSE	FALSE	FALSE	TRUE	.	0	0	.	0	0	.	.	.	0	0
chr9	119339501	119340502	-1	ENSMUSG00000032508	ENSMUST00000150837	Myd88	FALSE	FALSE	FALSE	TRUE	.	0	0	.	0	0	.	.	.	0	0
chr9	119340910	119341911	-1	ENSMUSG00000032508	ENSMUST00000139870	Myd88	FALSE	FALSE	FALSE	TRUE	.	0	0	.	0	0	.	.	.	0	0
chr9	119339540	119340541	-1	ENSMUSG00000032508	ENSMUST00000035092	Myd88	FALSE	FALSE	FALSE	TRUE	.	0	0	.	0	0	.	.	.	0	0
chr9	27154892	27155893	-1	ENSMUSG00000031990	ENSMUST00000034472	Jam3	FALSE	FALSE	FALSE	TRUE	.	0	0	.	0	0	.	.	.	0	0
chr9	27154917	27155918	-1	ENSMUSG00000031990	ENSMUST00000167074	Jam3	FALSE	FALSE	FALSE	TRUE	.	0	0	.	0	0	.	.	.	0	0
chr9	27148234	27149235	-1	ENSMUSG00000031990	ENSMUST00000213170	Jam3	FALSE	FALSE	FALSE	TRUE	.	0	0	.	0	0	.	.	.	0	0
chr9	27154920	27155921	-1	ENSMUSG00000031990	ENSMUST00000213682	Jam3	FALSE	FALSE	FALSE	TRUE	.	0	0	.	0	0	.	.	.	0	0
chr9	27126049	27127050	-1	ENSMUSG00000031990	ENSMUST00000215446	Jam3	FALSE	FALSE	FALSE	TRUE	.	0	0	.	0	0	.	.	.	0	0
chr9	63146479	63147480	-1	ENSMUSG00000022245	ENSMUST00000055281	Skor1	TRUE	FALSE	FALSE	FALSE	chr9	63146538	63146984	.	0	0	.	.	.	0	0
chr9	63146510	63147511	-1	ENSMUSG00000022245	ENSMUST00000119146	Skor1	TRUE	FALSE	FALSE	FALSE	chr9	63146538	63146984	.	0	0	.	.	.	0	0
chr9	63148460	63149461	-1	ENSMUSG00000022245	ENSMUST00000116613	Skor1	FALSE	FALSE	FALSE	TRUE	.	0	0	.	0	0	.	.	.	0	0
chr9	37418290	37419291	-1	ENSMUSG00000032128	ENSMUST00000167216	Robo3	FALSE	FALSE	FALSE	TRUE	.	0	0	.	0	0	.	.	.	0	0
chr9	37418363	37419364	-1	ENSMUSG00000032128	ENSMUST00000167089	Robo3	FALSE	FALSE	FALSE	TRUE	.	0	0	.	0	0	.	.	.	0	0
chr9	37422102	37423103	-1	ENSMUSG00000032128	ENSMUST00000171467	Robo3	FALSE	FALSE	FALSE	TRUE	.	0	0	.	0	0	.	.	.	0	0
chr9	37429633	37430634	-1	ENSMUSG00000032128	ENSMUST00000034643	Robo3	FALSE	FALSE	FALSE	TRUE	.	0	0	.	0	0	.	.	.	0	0
chr9	37432745	37433746	-1	ENSMUSG00000032128	ENSMUST00000115038	Robo3	FALSE	FALSE	FALSE	TRUE	.	0	0	.	0	0	.	.	.	0	0
chr9	37429633	37430634	-1	ENSMUSG00000032128	ENSMUST00000170512	Robo3	FALSE	FALSE	FALSE	TRUE	.	0	0	.	0	0	.	.	.	0	0

## Sheet: ISG_TSS_w_STAT_MEF
ISG Promoter Region							Bound by STAT				STAT1 peak			STAT1/2 peak
chr	start	end	strand	ENSEMBLE Gene ID	ENSEMBLE Transcript ID	Gene Symbole	STAT1 bound	STAT1/2 bound	STAT2 bound	Not bound	chr	start	end	chr	start	end
chr1	153752352	153753353	1	ENSMUSG00000066800	ENSMUST00000182538	Rnasel	FALSE	FALSE	FALSE	TRUE	.	0	0	.	0	0	.	.	chr1	153752352	153753353
chr1	153751468	153752469	1	ENSMUSG00000066800	ENSMUST00000182131	Rnasel	FALSE	FALSE	FALSE	TRUE	.	0	0	.	0	0	.	.	chr1	153751468	153752469
chr1	153751452	153752453	1	ENSMUSG00000066800	ENSMUST00000183241	Rnasel	FALSE	FALSE	FALSE	TRUE	.	0	0	.	0	0	.	.	chr1	153751452	153752453
chr1	153749004	153750005	1	ENSMUSG00000066800	ENSMUST00000182722	Rnasel	FALSE	FALSE	FALSE	TRUE	.	0	0	.	0	0	.	.	chr1	153749004	153750005
chr1	153755484	153756485	1	ENSMUSG00000066800	ENSMUST00000182016	Rnasel	FALSE	FALSE	FALSE	TRUE	.	0	0	.	0	0	.	.	chr1	153755484	153756485
chr1	153748926	153749927	1	ENSMUSG00000066800	ENSMUST00000086209	Rnasel	FALSE	FALSE	FALSE	TRUE	.	0	0	.	0	0	.	.	chr1	153748926	153749927
chr1	183297070	183298071	1	ENSMUSG00000042901	ENSMUST00000193959	Aida	FALSE	FALSE	FALSE	TRUE	.	0	0	.	0	0	.	.	chr1	183297070	183298071
chr1	183296549	183297550	1	ENSMUSG00000042901	ENSMUST00000109166	Aida	FALSE	FALSE	FALSE	TRUE	.	0	0	.	0	0	.	.	chr1	183296549	183297550
chr1	183321613	183322614	1	ENSMUSG00000042901	ENSMUST00000195268	Aida	FALSE	FALSE	FALSE	TRUE	.	0	0	.	0	0	.	.	chr1	183321613	183322614
chr1	183296905	183297906	1	ENSMUSG00000042901	ENSMUST00000193625	Aida	FALSE	FALSE	FALSE	TRUE	.	0	0	.	0	0	.	.	chr1	183296905	183297906
chr1	183305791	183306792	1	ENSMUSG00000042901	ENSMUST00000193359	Aida	FALSE	FALSE	FALSE	TRUE	.	0	0	.	0	0	.	.	chr1	183305791	183306792
chr1	183304132	183305133	1	ENSMUSG00000042901	ENSMUST00000194652	Aida	FALSE	FALSE	FALSE	TRUE	.	0	0	.	0	0	.	.	chr1	183304132	183305133
chr1	183296827	183297828	1	ENSMUSG00000042901	ENSMUST00000191782	Aida	FALSE	FALSE	FALSE	TRUE	.	0	0	.	0	0	.	.	chr1	183296827	183297828
chr1	183305931	183306932	1	ENSMUSG00000042901	ENSMUST00000192293	Aida	FALSE	FALSE	FALSE	TRUE	.	0	0	.	0	0	.	.	chr1	183305931	183306932
chr1	183296090	183297091	1	ENSMUSG00000042901	ENSMUST00000192252	Aida	FALSE	FALSE	FALSE	TRUE	.	0	0	.	0	0	.	.	chr1	183296090	183297091
chr1	52118990	52119991	1	ENSMUSG00000026104	ENSMUST00000191435	Stat1	TRUE	FALSE	FALSE	FALSE	chr1	52119383	52119556	.	0	0	.	.	chr1	52118990	52119991
chr1	52118955	52119956	1	ENSMUSG00000026104	ENSMUST00000070968	Stat1	TRUE	FALSE	FALSE	FALSE	chr1	52119383	52119556	.	0	0	.	.	chr1	52118955	52119956
chr1	52118940	52119941	1	ENSMUSG00000026104	ENSMUST00000186574	Stat1	TRUE	FALSE	FALSE	FALSE	chr1	52119383	52119556	.	0	0	.	.	chr1	52118940	52119941
chr1	52119072	52120073	1	ENSMUSG00000026104	ENSMUST00000185743	Stat1	TRUE	FALSE	FALSE	FALSE	chr1	52119383	52119556	.	0	0	.	.	chr1	52119072	52120073
chr1	52149758	52150759	1	ENSMUSG00000026104	ENSMUST00000189244	Stat1	FALSE	FALSE	FALSE	TRUE	.	0	0	.	0	0	.	.	chr1	52149758	52150759
chr1	52119049	52120050	1	ENSMUSG00000026104	ENSMUST00000189347	Stat1	TRUE	FALSE	FALSE	FALSE	chr1	52119383	52119556	.	0	0	.	.	chr1	52119049	52120050
chr1	52118998	52119999	1	ENSMUSG00000026104	ENSMUST00000188681	Stat1	TRUE	FALSE	FALSE	FALSE	chr1	52119383	52119556	.	0	0	.	.	chr1	52118998	52119999
chr1	52151753	52152754	1	ENSMUSG00000026104	ENSMUST00000189336	Stat1	FALSE	FALSE	FALSE	TRUE	.	0	0	.	0	0	.	.	chr1	52151753	52152754
chr1	52149604	52150605	1	ENSMUSG00000026104	ENSMUST00000189075	Stat1	FALSE	FALSE	FALSE	TRUE	.	0	0	.	0	0	.	.	chr1	52149604	52150605
chr1	52119124	52120125	1	ENSMUSG00000026104	ENSMUST00000186057	Stat1	TRUE	FALSE	FALSE	FALSE	chr1	52119383	52119556	.	0	0	.	.	chr1	52119124	52120125
chr1	52119059	52120060	1	ENSMUSG00000026104	ENSMUST00000186186	Stat1	TRUE	FALSE	FALSE	FALSE	chr1	52119383	52119556	.	0	0	.	.	chr1	52119059	52120060
chr1	52118992	52119993	1	ENSMUSG00000026104	ENSMUST00000186857	Stat1	TRUE	FALSE	FALSE	FALSE	chr1	52119383	52119556	.	0	0	.	.	chr1	52118992	52119993
chr1	36307233	36308234	1	ENSMUSG00000037447	ENSMUST00000126413	Arid5a	TRUE	FALSE	FALSE	FALSE	chr1	36308005	36308321	.	0	0	.	.	chr1	36307233	36308234
chr1	36307254	36308255	1	ENSMUSG00000037447	ENSMUST00000145179	Arid5a	TRUE	FALSE	FALSE	FALSE	chr1	36308005	36308321	.	0	0	.	.	chr1	36307254	36308255
chr1	36307254	36308255	1	ENSMUSG00000037447	ENSMUST00000097778	Arid5a	TRUE	FALSE	FALSE	FALSE	chr1	36308005	36308321	.	0	0	.	.	chr1	36307254	36308255
chr1	36307269	36308270	1	ENSMUSG00000037447	ENSMUST00000115029	Arid5a	TRUE	FALSE	FALSE	FALSE	chr1	36308005	36308321	.	0	0	.	.	chr1	36307269	36308270
chr1	36316527	36317528	1	ENSMUSG00000037447	ENSMUST00000141121	Arid5a	FALSE	FALSE	FALSE	TRUE	.	0	0	.	0	0	.	.	chr1	36316527	36317528
chr1	36307254	36308255	1	ENSMUSG00000037447	ENSMUST00000150747	Arid5a	TRUE	FALSE	FALSE	FALSE	chr1	36308005	36308321	.	0	0	.	.	chr1	36307254	36308255
chr1	36307254	36308255	1	ENSMUSG00000037447	ENSMUST00000124280	Arid5a	TRUE	FALSE	FALSE	FALSE	chr1	36308005	36308321	.	0	0	.	.	chr1	36307254	36308255
chr1	36307254	36308255	1	ENSMUSG00000037447	ENSMUST00000115031	Arid5a	TRUE	FALSE	FALSE	FALSE	chr1	36308005	36308321	.	0	0	.	.	chr1	36307254	36308255
chr1	36307279	36308280	1	ENSMUSG00000037447	ENSMUST00000140218	Arid5a	TRUE	FALSE	FALSE	FALSE	chr1	36308005	36308321	.	0	0	.	.	chr1	36307279	36308280
chr1	36307254	36308255	1	ENSMUSG00000037447	ENSMUST00000116629	Arid5a	TRUE	FALSE	FALSE	FALSE	chr1	36308005	36308321	.	0	0	.	.	chr1	36307254	36308255
chr1	36307254	36308255	1	ENSMUSG00000037447	ENSMUST00000142319	Arid5a	TRUE	FALSE	FALSE	FALSE	chr1	36308005	36308321	.	0	0	.	.	chr1	36307254	36308255
chr1	36307258	36308259	1	ENSMUSG00000037447	ENSMUST00000192874	Arid5a	TRUE	FALSE	FALSE	FALSE	chr1	36308005	36308321	.	0	0	.	.	chr1	36307258	36308259
chr1	36307254	36308255	1	ENSMUSG00000037447	ENSMUST00000137906	Arid5a	TRUE	FALSE	FALSE	FALSE	chr1	36308005	36308321	.	0	0	.	.	chr1	36307254	36308255
chr1	36315492	36316493	1	ENSMUSG00000037447	ENSMUST00000147123	Arid5a	FALSE	FALSE	FALSE	TRUE	.	0	0	.	0	0	.	.	chr1	36315492	36316493
chr1	36307254	36308255	1	ENSMUSG00000037447	ENSMUST00000115032	Arid5a	TRUE	FALSE	FALSE	FALSE	chr1	36308005	36308321	.	0	0	.	.	chr1	36307254	36308255
chr1	173630417	173631418	1	ENSMUSG00000043263	ENSMUST00000056071	Ifi209	FALSE	FALSE	FALSE	TRUE	.	0	0	.	0	0	.	.	chr1	173630417	173631418
chr1	173630525	173631526	1	ENSMUSG00000043263	ENSMUST00000193727	Ifi209	FALSE	FALSE	FALSE	TRUE	.	0	0	.	0	0	.	.	chr1	173630525	173631526
chr1	173673180	173674181	1	ENSMUSG00000066677	ENSMUST00000085876	Ifi208	FALSE	FALSE	FALSE	TRUE	.	0	0	.	0	0	.	.	chr1	173673180	173674181
chr1	173673175	173674176	1	ENSMUSG00000066677	ENSMUST00000182880	Ifi208	FALSE	FALSE	FALSE	TRUE	.	0	0	.	0	0	.	.	chr1	173673175	173674176
chr1	173677186	173678187	1	ENSMUSG00000066677	ENSMUST00000169857	Ifi208	FALSE	FALSE	FALSE	TRUE	.	0	0	.	0	0	.	.	chr1	173677186	173678187
chr1	156040390	156041391	1	ENSMUSG00000050565	ENSMUST00000131359	Tor1aip2	FALSE	FALSE	FALSE	TRUE	.	0	0	.	0	0	.	.	chr1	156040390	156041391
chr1	156035272	156036273	1	ENSMUSG00000050565	ENSMUST00000133152	Tor1aip2	FALSE	FALSE	FALSE	TRUE	.	0	0	.	0	0	.	.	chr1	156035272	156036273
chr1	156035633	156036634	1	ENSMUSG00000050565	ENSMUST00000128941	Tor1aip2	FALSE	FALSE	FALSE	TRUE	.	0	0	.	0	0	.	.	chr1	156035633	156036634
chr1	156034903	156035904	1	ENSMUSG00000050565	ENSMUST00000111757	Tor1aip2	FALSE	FALSE	FALSE	TRUE	.	0	0	.	0	0	.	.	chr1	156034903	156035904
chr1	156040417	156041418	1	ENSMUSG00000050565	ENSMUST00000097526	Tor1aip2	FALSE	FALSE	FALSE	TRUE	.	0	0	.	0	0	.	.	chr1	156040417	156041418
chr1	156062713	156063714	1	ENSMUSG00000050565	ENSMUST00000125371	Tor1aip2	FALSE	FALSE	FALSE	TRUE	.	0	0	.	0	0	.	.	chr1	156062713	156063714
chr1	156040417	156041418	1	ENSMUSG00000050565	ENSMUST00000065648	Tor1aip2	FALSE	FALSE	FALSE	TRUE	.	0	0	.	0	0	.	.	chr1	156040417	156041418
chr1	156035226	156036227	1	ENSMUSG00000050565	ENSMUST00000111754	Tor1aip2	FALSE	FALSE	FALSE	TRUE	.	0	0	.	0	0	.	.	chr1	156035226	156036227
chr1	156040390	156041391	1	ENSMUSG00000050565	ENSMUST00000060404	Tor1aip2	FALSE	FALSE	FALSE	TRUE	.	0	0	.	0	0	.	.	chr1	156040390	156041391
chr1	131866724	131867725	1	ENSMUSG00000026433	ENSMUST00000112386	Rab29	FALSE	FALSE	FALSE	TRUE	.	0	0	.	0	0	.	.	chr1	131866724	131867725
chr1	131867011	131868012	1	ENSMUSG00000026433	ENSMUST00000125925	Rab29	FALSE	FALSE	FALSE	TRUE	.	0	0	.	0	0	.	.	chr1	131867011	131868012
chr1	131867153	131868154	1	ENSMUSG00000026433	ENSMUST00000187084	Rab29	FALSE	FALSE	FALSE	TRUE	.	0	0	.	0	0	.	.	chr1	131867153	131868154
chr1	131866740	131867741	1	ENSMUSG00000026433	ENSMUST00000027693	Rab29	FALSE	FALSE	FALSE	TRUE	.	0	0	.	0	0	.	.	chr1	131866740	131867741
chr1	161494155	161495156	1	ENSMUSG00000066755	ENSMUST00000086084	Tnfsf18	FALSE	FALSE	FALSE	TRUE	.	0	0	.	0	0	.	.	chr1	161494155	161495156
chr1	138963228	138964229	1	ENSMUSG00000056268	ENSMUST00000198759	Dennd1b	FALSE	FALSE	FALSE	TRUE	.	0	0	.	0	0	.	.	chr1	138963228	138964229
chr1	138962935	138963936	1	ENSMUSG00000056268	ENSMUST00000200533	Dennd1b	FALSE	FALSE	FALSE	TRUE	.	0	0	.	0	0	.	.	chr1	138962935	138963936
chr1	138963369	138964370	1	ENSMUSG00000056268	ENSMUST00000200429	Dennd1b	FALSE	FALSE	FALSE	TRUE	.	0	0	.	0	0	.	.	chr1	138963369	138964370
chr1	139121255	139122256	1	ENSMUSG00000056268	ENSMUST00000199634	Dennd1b	FALSE	FALSE	FALSE	TRUE	.	0	0	.	0	0	.	.	chr1	139121255	139122256
chr1	139053821	139054822	1	ENSMUSG00000056268	ENSMUST00000196816	Dennd1b	FALSE	FALSE	FALSE	TRUE	.	0	0	.	0	0	.	.	chr1	139053821	139054822
chr1	139121255	139122256	1	ENSMUSG00000056268	ENSMUST00000200295	Dennd1b	FALSE	FALSE	FALSE	TRUE	.	0	0	.	0	0	.	.	chr1	139121255	139122256
chr1	139085424	139086425	1	ENSMUSG00000056268	ENSMUST00000198418	Dennd1b	FALSE	FALSE	FALSE	TRUE	.	0	0	.	0	0	.	.	chr1	139085424	139086425
chr1	138967220	138968221	1	ENSMUSG00000056268	ENSMUST00000094505	Dennd1b	FALSE	FALSE	FALSE	TRUE	.	0	0	.	0	0	.	.	chr1	138967220	138968221
chr1	138963209	138964210	1	ENSMUSG00000056268	ENSMUST00000168527	Dennd1b	FALSE	FALSE	FALSE	TRUE	.	0	0	.	0	0	.	.	chr1	138963209	138964210
chr1	85599878	85600879	1	ENSMUSG00000070031	ENSMUST00000113385	Sp140	FALSE	FALSE	FALSE	TRUE	.	0	0	.	0	0	.	.	chr1	85599878	85600879
chr1	85634884	85635885	1	ENSMUSG00000070031	ENSMUST00000159234	Sp140	FALSE	FALSE	FALSE	TRUE	.	0	0	.	0	0	.	.	chr1	85634884	85635885
chr1	85642489	85643490	1	ENSMUSG00000070031	ENSMUST00000160119	Sp140	FALSE	FALSE	FALSE	TRUE	.	0	0	.	0	0	.	.	chr1	85642489	85643490
chr1	85600203	85601204	1	ENSMUSG00000070031	ENSMUST00000080204	Sp140	FALSE	FALSE	FALSE	TRUE	.	0	0	.	0	0	.	.	chr1	85600203	85601204
chr1	85610333	85611334	1	ENSMUSG00000070031	ENSMUST00000162925	Sp140	FALSE	FALSE	FALSE	TRUE	.	0	0	.	0	0	.	.	chr1	85610333	85611334
chr1	85631978	85632979	1	ENSMUSG00000070031	ENSMUST00000161497	Sp140	FALSE	FALSE	FALSE	TRUE	.	0	0	.	0	0	.	.	chr1	85631978	85632979
chr1	85649514	85650515	1	ENSMUSG00000026222	ENSMUST00000054279	Sp100	FALSE	TRUE	FALSE	FALSE	.	0	0	chr1	85649833	85650219	element_31	5	chr1	85649514	85650515
chr1	85649488	85650489	1	ENSMUSG00000026222	ENSMUST00000141998	Sp100	FALSE	TRUE	FALSE	FALSE	.	0	0	chr1	85649833	85650219	element_31	5	chr1	85649488	85650489
chr1	85649514	85650515	1	ENSMUSG00000026222	ENSMUST00000147552	Sp100	FALSE	TRUE	FALSE	FALSE	.	0	0	chr1	85649833	85650219	element_31	5	chr1	85649514	85650515
chr1	85693439	85694440	1	ENSMUSG00000026222	ENSMUST00000134283	Sp100	FALSE	FALSE	FALSE	TRUE	.	0	0	.	0	0	.	.	chr1	85693439	85694440
chr1	85649515	85650516	1	ENSMUSG00000026222	ENSMUST00000150967	Sp100	FALSE	TRUE	FALSE	FALSE	.	0	0	chr1	85649833	85650219	element_31	5	chr1	85649515	85650516
chr1	85649508	85650509	1	ENSMUSG00000026222	ENSMUST00000145440	Sp100	FALSE	TRUE	FALSE	FALSE	.	0	0	chr1	85649833	85650219	element_31	5	chr1	85649508	85650509
chr1	85649514	85650515	1	ENSMUSG00000026222	ENSMUST00000153574	Sp100	FALSE	TRUE	FALSE	FALSE	.	0	0	chr1	85649833	85650219	element_31	5	chr1	85649514	85650515
chr1	85649550	85650551	1	ENSMUSG00000026222	ENSMUST00000066427	Sp100	FALSE	TRUE	FALSE	FALSE	.	0	0	chr1	85649833	85650219	element_31	5	chr1	85649550	85650551
chr1	85649488	85650489	1	ENSMUSG00000026222	ENSMUST00000155094	Sp100	FALSE	TRUE	FALSE	FALSE	.	0	0	chr1	85649833	85650219	element_31	5	chr1	85649488	85650489
chr1	85671325	85672326	1	ENSMUSG00000026222	ENSMUST00000129951	Sp100	FALSE	FALSE	FALSE	TRUE	.	0	0	.	0	0	.	.	chr1	85671325	85672326
chr1	85702942	85703943	1	ENSMUSG00000026222	ENSMUST00000141709	Sp100	FALSE	FALSE	FALSE	TRUE	.	0	0	.	0	0	.	.	chr1	85702942	85703943
chr1	85673217	85674218	1	ENSMUSG00000026222	ENSMUST00000140758	Sp100	FALSE	FALSE	FALSE	TRUE	.	0	0	.	0	0	.	.	chr1	85673217	85674218
chr1	85693797	85694798	1	ENSMUSG00000026222	ENSMUST00000132641	Sp100	FALSE	FALSE	FALSE	TRUE	.	0	0	.	0	0	.	.	chr1	85693797	85694798
chr1	92906481	92907482	1	ENSMUSG00000047067	ENSMUST00000060913	Dusp28	FALSE	FALSE	FALSE	TRUE	.	0	0	.	0	0	.	.	chr1	92906481	92907482
chr1	92916512	92917513	1	ENSMUSG00000026269	ENSMUST00000178361	Rnpepl1	FALSE	FALSE	FALSE	TRUE	.	0	0	.	0	0	.	.	chr1	92916512	92917513
chr1	92919114	92920115	1	ENSMUSG00000026269	ENSMUST00000179531	Rnpepl1	FALSE	FALSE	FALSE	TRUE	.	0	0	.	0	0	.	.	chr1	92919114	92920115
chr1	92916291	92917292	1	ENSMUSG00000026269	ENSMUST00000179127	Rnpepl1	FALSE	FALSE	FALSE	TRUE	.	0	0	.	0	0	.	.	chr1	92916291	92917292
chr1	92916305	92917306	1	ENSMUSG00000026269	ENSMUST00000178662	Rnpepl1	FALSE	FALSE	FALSE	TRUE	.	0	0	.	0	0	.	.	chr1	92916305	92917306
chr1	92910353	92911354	1	ENSMUSG00000026269	ENSMUST00000180306	Rnpepl1	FALSE	FALSE	FALSE	TRUE	.	0	0	.	0	0	.	.	chr1	92910353	92911354
chr1	92910709	92911710	1	ENSMUSG00000026269	ENSMUST00000179993	Rnpepl1	FALSE	FALSE	FALSE	TRUE	.	0	0	.	0	0	.	.	chr1	92910709	92911710
chr1	92915344	92916345	1	ENSMUSG00000026269	ENSMUST00000178816	Rnpepl1	FALSE	FALSE	FALSE	TRUE	.	0	0	.	0	0	.	.	chr1	92915344	92916345
chr1	92916916	92917917	1	ENSMUSG00000026269	ENSMUST00000178778	Rnpepl1	FALSE	FALSE	FALSE	TRUE	.	0	0	.	0	0	.	.	chr1	92916916	92917917
chr1	92910325	92911326	1	ENSMUSG00000026269	ENSMUST00000179854	Rnpepl1	FALSE	FALSE	FALSE	TRUE	.	0	0	.	0	0	.	.	chr1	92910325	92911326
chr1	92910283	92911284	1	ENSMUSG00000026269	ENSMUST00000027487	Rnpepl1	FALSE	FALSE	FALSE	TRUE	.	0	0	.	0	0	.	.	chr1	92910283	92911284
chr1	92916647	92917648	1	ENSMUSG00000026269	ENSMUST00000179837	Rnpepl1	FALSE	FALSE	FALSE	TRUE	.	0	0	.	0	0	.	.	chr1	92916647	92917648
chr1	92910621	92911622	1	ENSMUSG00000026269	ENSMUST00000178116	Rnpepl1	FALSE	FALSE	FALSE	TRUE	.	0	0	.	0	0	.	.	chr1	92910621	92911622
chr1	152877667	152878668	-1	ENSMUSG00000042772	ENSMUST00000043560	Smg7	FALSE	FALSE	FALSE	TRUE	.	0	0	.	0	0	.	.	chr1	152877667	152878668
chr1	152902145	152903146	-1	ENSMUSG00000042772	ENSMUST00000111836	Smg7	FALSE	FALSE	FALSE	TRUE	.	0	0	.	0	0	.	.	chr1	152902145	152903146
chr1	152902121	152903122	-1	ENSMUSG00000042772	ENSMUST00000073441	Smg7	FALSE	FALSE	FALSE	TRUE	.	0	0	.	0	0	.	.	chr1	152902121	152903122
chr1	152848504	152849505	-1	ENSMUSG00000042772	ENSMUST00000186900	Smg7	FALSE	FALSE	FALSE	TRUE	.	0	0	.	0	0	.	.	chr1	152848504	152849505
chr1	152870657	152871658	-1	ENSMUSG00000042772	ENSMUST00000186692	Smg7	FALSE	FALSE	FALSE	TRUE	.	0	0	.	0	0	.	.	chr1	152870657	152871658
chr1	152848419	152849420	-1	ENSMUSG00000042772	ENSMUST00000188937	Smg7	FALSE	FALSE	FALSE	TRUE	.	0	0	.	0	0	.	.	chr1	152848419	152849420
chr1	173535440	173536441	-1	ENSMUSG00000070501	ENSMUST00000195022	Ifi214	FALSE	FALSE	FALSE	TRUE	.	0	0	.	0	0	.	.	chr1	173535440	173536441
chr1	173535456	173536457	-1	ENSMUSG00000070501	ENSMUST00000090406	Ifi214	FALSE	FALSE	FALSE	TRUE	.	0	0	.	0	0	.	.	chr1	173535456	173536457
chr1	173535301	173536302	-1	ENSMUSG00000070501	ENSMUST00000097463	Ifi214	FALSE	FALSE	FALSE	TRUE	.	0	0	.	0	0	.	.	chr1	173535301	173536302
chr1	173535456	173536457	-1	ENSMUSG00000070501	ENSMUST00000139092	Ifi214	FALSE	FALSE	FALSE	TRUE	.	0	0	.	0	0	.	.	chr1	173535456	173536457
chr1	173598608	173599609	-1	ENSMUSG00000073491	ENSMUST00000180215	Ifi213	FALSE	FALSE	FALSE	TRUE	.	0	0	.	0	0	.	.	chr1	173598608	173599609
chr1	173598773	173599774	-1	ENSMUSG00000073491	ENSMUST00000097462	Ifi213	FALSE	FALSE	FALSE	TRUE	.	0	0	.	0	0	.	.	chr1	173598773	173599774
chr1	173598573	173599574	-1	ENSMUSG00000073491	ENSMUST00000150649	Ifi213	FALSE	FALSE	FALSE	TRUE	.	0	0	.	0	0	.	.	chr1	173598573	173599574
chr1	173579852	173580853	-1	ENSMUSG00000073491	ENSMUST00000178186	Ifi213	FALSE	FALSE	FALSE	TRUE	.	0	0	.	0	0	.	.	chr1	173579852	173580853
chr1	173579899	173580900	-1	ENSMUSG00000073491	ENSMUST00000179648	Ifi213	FALSE	FALSE	FALSE	TRUE	.	0	0	.	0	0	.	.	chr1	173579899	173580900
chr1	173741246	173742247	-1	ENSMUSG00000073490	ENSMUST00000042610	Ifi207	FALSE	FALSE	FALSE	TRUE	.	0	0	.	0	0	.	.	chr1	173741246	173742247
chr1	173741246	173742247	-1	ENSMUSG00000073490	ENSMUST00000127730	Ifi207	FALSE	FALSE	FALSE	TRUE	.	0	0	.	0	0	.	.	chr1	173741246	173742247
chr1	173766442	173767443	-1	ENSMUSG00000073489	ENSMUST00000192414	Ifi204	FALSE	TRUE	FALSE	FALSE	.	0	0	chr1	173766925	173767308	element_14	1	chr1	173766442	173767443
chr1	173766418	173767419	-1	ENSMUSG00000073489	ENSMUST00000111214	Ifi204	FALSE	TRUE	FALSE	FALSE	.	0	0	chr1	173766925	173767308	element_14	1	chr1	173766418	173767419
chr1	173797769	173798770	-1	ENSMUSG00000090222	ENSMUST00000155076	Ifi203-ps	FALSE	FALSE	FALSE	TRUE	.	0	0	.	0	0	.	.	chr1	173797769	173798770
chr1	173941959	173942960	-1	ENSMUSG00000039997	ENSMUST00000042228	Ifi203	FALSE	TRUE	FALSE	FALSE	.	0	0	chr1	173942423	173942625	element_16	2	chr1	173941959	173942960
chr1	173941979	173942980	-1	ENSMUSG00000039997	ENSMUST00000138143	Ifi203	FALSE	TRUE	FALSE	FALSE	.	0	0	chr1	173942423	173942625	element_16	2	chr1	173941979	173942980
chr1	173941953	173942954	-1	ENSMUSG00000039997	ENSMUST00000140143	Ifi203	FALSE	TRUE	FALSE	FALSE	.	0	0	chr1	173942423	173942625	element_16	2	chr1	173941953	173942954
chr1	173941990	173942991	-1	ENSMUSG00000039997	ENSMUST00000129829	Ifi203	FALSE	TRUE	FALSE	FALSE	.	0	0	chr1	173942423	173942625	element_16	2	chr1	173941990	173942991
chr1	173941959	173942960	-1	ENSMUSG00000039997	ENSMUST00000081216	Ifi203	FALSE	TRUE	FALSE	FALSE	.	0	0	chr1	173942423	173942625	element_16	2	chr1	173941959	173942960
chr1	173941990	173942991	-1	ENSMUSG00000039997	ENSMUST00000135331	Ifi203	FALSE	TRUE	FALSE	FALSE	.	0	0	chr1	173942423	173942625	element_16	2	chr1	173941990	173942991
chr1	173941959	173942960	-1	ENSMUSG00000039997	ENSMUST00000128430	Ifi203	FALSE	TRUE	FALSE	FALSE	.	0	0	chr1	173942423	173942625	element_16	2	chr1	173941959	173942960
chr1	173941991	173942992	-1	ENSMUSG00000039997	ENSMUST00000123708	Ifi203	FALSE	TRUE	FALSE	FALSE	.	0	0	chr1	173942423	173942625	element_16	2	chr1	173941991	173942992
chr1	173942171	173943172	-1	ENSMUSG00000039997	ENSMUST00000156895	Ifi203	FALSE	TRUE	FALSE	FALSE	.	0	0	chr1	173942423	173942625	element_16	2	chr1	173942171	173943172
chr1	173912545	173913546	-1	ENSMUSG00000026536	ENSMUST00000009340	Ifi211	FALSE	TRUE	FALSE	FALSE	.	0	0	chr1	173912860	173913371	element_15	1	chr1	173912545	173913546
chr1	173879707	173880708	-1	ENSMUSG00000090272	ENSMUST00000187636	Mndal	FALSE	FALSE	FALSE	TRUE	.	0	0	.	0	0	.	.	chr1	173879707	173880708
chr1	173868259	173869260	-1	ENSMUSG00000090272	ENSMUST00000189474	Mndal	FALSE	FALSE	FALSE	TRUE	.	0	0	.	0	0	.	.	chr1	173868259	173869260
chr1	173861998	173862999	-1	ENSMUSG00000090272	ENSMUST00000220623	Mndal	FALSE	FALSE	FALSE	TRUE	.	0	0	.	0	0	.	.	chr1	173861998	173862999
chr1	173879610	173880611	-1	ENSMUSG00000090272	ENSMUST00000190651	Mndal	FALSE	FALSE	FALSE	TRUE	.	0	0	.	0	0	.	.	chr1	173879610	173880611
chr1	173941990	173942991	-1	ENSMUSG00000090272	ENSMUST00000111210	Mndal	FALSE	TRUE	FALSE	FALSE	.	0	0	chr1	173942423	173942625	element_16	2	chr1	173941990	173942991
chr1	173880380	173881381	-1	ENSMUSG00000090272	ENSMUST00000189501	Mndal	FALSE	FALSE	FALSE	TRUE	.	0	0	.	0	0	.	.	chr1	173880380	173881381
chr1	173879686	173880687	-1	ENSMUSG00000090272	ENSMUST00000191500	Mndal	FALSE	FALSE	FALSE	TRUE	.	0	0	.	0	0	.	.	chr1	173879686	173880687
chr1	173872509	173873510	-1	ENSMUSG00000090272	ENSMUST00000190071	Mndal	FALSE	FALSE	FALSE	TRUE	.	0	0	.	0	0	.	.	chr1	173872509	173873510
chr1	173879804	173880805	-1	ENSMUSG00000090272	ENSMUST00000188804	Mndal	FALSE	FALSE	FALSE	TRUE	.	0	0	.	0	0	.	.	chr1	173879804	173880805
chr1	173875359	173876360	-1	ENSMUSG00000090272	ENSMUST00000186442	Mndal	FALSE	FALSE	FALSE	TRUE	.	0	0	.	0	0	.	.	chr1	173875359	173876360
chr1	40790186	40791187	-1	ENSMUSG00000041945	ENSMUST00000131390	Mfsd9	FALSE	FALSE	FALSE	TRUE	.	0	0	.	0	0	.	.	chr1	40790186	40791187
chr1	40790156	40791157	-1	ENSMUSG00000041945	ENSMUST00000144385	Mfsd9	FALSE	FALSE	FALSE	TRUE	.	0	0	.	0	0	.	.	chr1	40790156	40791157
chr1	40790162	40791163	-1	ENSMUSG00000041945	ENSMUST00000039672	Mfsd9	FALSE	FALSE	FALSE	TRUE	.	0	0	.	0	0	.	.	chr1	40790162	40791163
chr1	173982243	173983244	-1	ENSMUSG00000026535	ENSMUST00000000266	Ifi202b	FALSE	FALSE	FALSE	TRUE	.	0	0	.	0	0	.	.	chr1	173982243	173983244
chr1	156029506	156030507	-1	ENSMUSG00000102964	ENSMUST00000193532	9430034N14Rik	FALSE	FALSE	FALSE	TRUE	.	0	0	.	0	0	.	.	chr1	156029506	156030507
chr1	156035549	156036550	-1	ENSMUSG00000026466	ENSMUST00000123705	Tor1aip1	FALSE	FALSE	FALSE	TRUE	.	0	0	.	0	0	.	.	chr1	156035549	156036550
chr1	156032452	156033453	-1	ENSMUSG00000026466	ENSMUST00000136397	Tor1aip1	FALSE	FALSE	FALSE	TRUE	.	0	0	.	0	0	.	.	chr1	156032452	156033453
chr1	156018118	156019119	-1	ENSMUSG00000026466	ENSMUST00000124212	Tor1aip1	FALSE	FALSE	FALSE	TRUE	.	0	0	.	0	0	.	.	chr1	156018118	156019119
chr1	156035646	156036647	-1	ENSMUSG00000026466	ENSMUST00000141980	Tor1aip1	FALSE	FALSE	FALSE	TRUE	.	0	0	.	0	0	.	.	chr1	156035646	156036647
chr1	156035979	156036980	-1	ENSMUSG00000026466	ENSMUST00000027738	Tor1aip1	FALSE	FALSE	FALSE	TRUE	.	0	0	.	0	0	.	.	chr1	156035979	156036980
chr1	156035979	156036980	-1	ENSMUSG00000026466	ENSMUST00000136331	Tor1aip1	FALSE	FALSE	FALSE	TRUE	.	0	0	.	0	0	.	.	chr1	156035979	156036980
chr1	156035926	156036927	-1	ENSMUSG00000026466	ENSMUST00000097527	Tor1aip1	FALSE	FALSE	FALSE	TRUE	.	0	0	.	0	0	.	.	chr1	156035926	156036927
chr1	156034379	156035380	-1	ENSMUSG00000026466	ENSMUST00000141878	Tor1aip1	FALSE	FALSE	FALSE	TRUE	.	0	0	.	0	0	.	.	chr1	156034379	156035380
chr1	156034316	156035317	-1	ENSMUSG00000026466	ENSMUST00000169241	Tor1aip1	FALSE	FALSE	FALSE	TRUE	.	0	0	.	0	0	.	.	chr1	156034316	156035317
chr1	156035979	156036980	-1	ENSMUSG00000026466	ENSMUST00000130995	Tor1aip1	FALSE	FALSE	FALSE	TRUE	.	0	0	.	0	0	.	.	chr1	156035979	156036980
chr1	174031309	174032310	-1	ENSMUSG00000054203	ENSMUST00000192166	Ifi205	FALSE	FALSE	FALSE	TRUE	.	0	0	.	0	0	.	.	chr1	174031309	174032310
chr1	174031254	174032255	-1	ENSMUSG00000054203	ENSMUST00000059226	Ifi205	FALSE	FALSE	FALSE	TRUE	.	0	0	.	0	0	.	.	chr1	174031254	174032255
chr1	156666229	156667230	-1	ENSMUSG00000060519	ENSMUST00000152604	Tor3a	FALSE	FALSE	FALSE	TRUE	.	0	0	.	0	0	.	.	chr1	156666229	156667230
chr1	156673813	156674814	-1	ENSMUSG00000060519	ENSMUST00000122242	Tor3a	FALSE	TRUE	FALSE	FALSE	.	0	0	chr1	156674278	156674802	element_11	1	chr1	156673813	156674814
chr1	156673813	156674814	-1	ENSMUSG00000060519	ENSMUST00000188964	Tor3a	FALSE	TRUE	FALSE	FALSE	.	0	0	chr1	156674278	156674802	element_11	1	chr1	156673813	156674814
chr1	156673855	156674856	-1	ENSMUSG00000060519	ENSMUST00000079625	Tor3a	FALSE	TRUE	FALSE	FALSE	.	0	0	chr1	156674278	156674802	element_11	1	chr1	156673855	156674856
chr1	156673855	156674856	-1	ENSMUSG00000060519	ENSMUST00000150557	Tor3a	FALSE	TRUE	FALSE	FALSE	.	0	0	chr1	156674278	156674802	element_11	1	chr1	156673855	156674856
chr1	156673824	156674825	-1	ENSMUSG00000060519	ENSMUST00000156861	Tor3a	FALSE	TRUE	FALSE	FALSE	.	0	0	chr1	156674278	156674802	element_11	1	chr1	156673824	156674825
chr1	156657957	156658958	-1	ENSMUSG00000060519	ENSMUST00000154353	Tor3a	FALSE	FALSE	FALSE	TRUE	.	0	0	.	0	0	.	.	chr1	156657957	156658958
chr1	156673834	156674835	-1	ENSMUSG00000060519	ENSMUST00000190607	Tor3a	FALSE	TRUE	FALSE	FALSE	.	0	0	chr1	156674278	156674802	element_11	1	chr1	156673834	156674835
chr1	52817067	52818068	-1	ENSMUSG00000026102	ENSMUST00000162576	Inpp1	FALSE	FALSE	FALSE	TRUE	.	0	0	.	0	0	.	.	chr1	52817067	52818068
chr1	52817187	52818188	-1	ENSMUSG00000026102	ENSMUST00000027271	Inpp1	FALSE	FALSE	FALSE	TRUE	.	0	0	.	0	0	.	.	chr1	52817187	52818188
chr1	52794547	52795548	-1	ENSMUSG00000026102	ENSMUST00000159607	Inpp1	FALSE	FALSE	FALSE	TRUE	.	0	0	.	0	0	.	.	chr1	52794547	52795548
chr1	52799870	52800871	-1	ENSMUSG00000026102	ENSMUST00000159725	Inpp1	FALSE	FALSE	FALSE	TRUE	.	0	0	.	0	0	.	.	chr1	52799870	52800871
chr1	52798987	52799988	-1	ENSMUSG00000026102	ENSMUST00000177279	Inpp1	FALSE	FALSE	FALSE	TRUE	.	0	0	.	0	0	.	.	chr1	52798987	52799988
chr1	52816950	52817951	-1	ENSMUSG00000026102	ENSMUST00000162351	Inpp1	FALSE	FALSE	FALSE	TRUE	.	0	0	.	0	0	.	.	chr1	52816950	52817951
chr1	177248266	177249267	-1	ENSMUSG00000019699	ENSMUST00000111160	Akt3	FALSE	FALSE	FALSE	TRUE	.	0	0	.	0	0	.	.	chr1	177248266	177249267
chr1	177248304	177249305	-1	ENSMUSG00000019699	ENSMUST00000019843	Akt3	FALSE	FALSE	FALSE	TRUE	.	0	0	.	0	0	.	.	chr1	177248304	177249305
chr1	177257702	177258703	-1	ENSMUSG00000019699	ENSMUST00000111159	Akt3	FALSE	FALSE	FALSE	TRUE	.	0	0	.	0	0	.	.	chr1	177257702	177258703
chr1	177257091	177258092	-1	ENSMUSG00000019699	ENSMUST00000211158	Akt3	FALSE	FALSE	FALSE	TRUE	.	0	0	.	0	0	.	.	chr1	177257091	177258092
chr1	37889775	37890776	-1	ENSMUSG00000026088	ENSMUST00000138806	Mitd1	FALSE	TRUE	FALSE	FALSE	.	0	0	chr1	37889887	37890450	element_23	4	chr1	37889775	37890776
chr1	37889906	37890907	-1	ENSMUSG00000026088	ENSMUST00000139725	Mitd1	FALSE	TRUE	FALSE	FALSE	.	0	0	chr1	37889887	37890450	element_23	4	chr1	37889906	37890907
chr1	37879617	37880618	-1	ENSMUSG00000026088	ENSMUST00000131754	Mitd1	FALSE	FALSE	FALSE	TRUE	.	0	0	.	0	0	.	.	chr1	37879617	37880618
chr1	37881367	37882368	-1	ENSMUSG00000026088	ENSMUST00000127170	Mitd1	FALSE	FALSE	FALSE	TRUE	.	0	0	.	0	0	.	.	chr1	37881367	37882368
chr1	37889910	37890911	-1	ENSMUSG00000026088	ENSMUST00000027257	Mitd1	FALSE	TRUE	FALSE	FALSE	.	0	0	chr1	37889887	37890450	element_23	4	chr1	37889910	37890911
chr1	85583777	85584778	-1	ENSMUSG00000070034	ENSMUST00000186740	Sp110	FALSE	FALSE	FALSE	TRUE	.	0	0	.	0	0	.	.	chr1	85583777	85584778
chr1	85598248	85599249	-1	ENSMUSG00000070034	ENSMUST00000131950	Sp110	FALSE	FALSE	FALSE	TRUE	.	0	0	.	0	0	.	.	chr1	85598248	85599249
chr1	85598278	85599279	-1	ENSMUSG00000070034	ENSMUST00000143363	Sp110	FALSE	FALSE	FALSE	TRUE	.	0	0	.	0	0	.	.	chr1	85598278	85599279
chr1	85598278	85599279	-1	ENSMUSG00000070034	ENSMUST00000152399	Sp110	FALSE	FALSE	FALSE	TRUE	.	0	0	.	0	0	.	.	chr1	85598278	85599279
chr1	85598278	85599279	-1	ENSMUSG00000070034	ENSMUST00000150114	Sp110	FALSE	FALSE	FALSE	TRUE	.	0	0	.	0	0	.	.	chr1	85598278	85599279
chr1	85588690	85589691	-1	ENSMUSG00000070034	ENSMUST00000128339	Sp110	FALSE	FALSE	FALSE	TRUE	.	0	0	.	0	0	.	.	chr1	85588690	85589691
chr1	85598316	85599317	-1	ENSMUSG00000070034	ENSMUST00000093508	Sp110	FALSE	FALSE	FALSE	TRUE	.	0	0	.	0	0	.	.	chr1	85598316	85599317
chr1	85598278	85599279	-1	ENSMUSG00000070034	ENSMUST00000151690	Sp110	FALSE	FALSE	FALSE	TRUE	.	0	0	.	0	0	.	.	chr1	85598278	85599279
chr1	85598278	85599279	-1	ENSMUSG00000070034	ENSMUST00000130727	Sp110	FALSE	FALSE	FALSE	TRUE	.	0	0	.	0	0	.	.	chr1	85598278	85599279
chr10	23894354	23895355	1	ENSMUSG00000037440	ENSMUST00000219254	Vnn1	FALSE	FALSE	FALSE	TRUE	.	0	0	.	0	0	.	.	chr10	23894354	23895355
chr10	23894188	23895189	1	ENSMUSG00000037440	ENSMUST00000041416	Vnn1	FALSE	FALSE	FALSE	TRUE	.	0	0	.	0	0	.	.	chr10	23894188	23895189
chr10	128281148	128282149	1	ENSMUSG00000040033	ENSMUST00000220142	Stat2	FALSE	FALSE	FALSE	TRUE	.	0	0	.	0	0	.	.	chr10	128281148	128282149
chr10	128270076	128271077	1	ENSMUSG00000040033	ENSMUST00000085708	Stat2	FALSE	TRUE	FALSE	FALSE	.	0	0	chr10	128270005	128270563	element_35	4	chr10	128270076	128271077
chr10	128283607	128284608	1	ENSMUSG00000040033	ENSMUST00000220277	Stat2	FALSE	FALSE	FALSE	TRUE	.	0	0	.	0	0	.	.	chr10	128283607	128284608
chr10	128282317	128283318	1	ENSMUSG00000040033	ENSMUST00000217727	Stat2	FALSE	FALSE	FALSE	TRUE	.	0	0	.	0	0	.	.	chr10	128282317	128283318
chr10	128270059	128271060	1	ENSMUSG00000040033	ENSMUST00000218863	Stat2	FALSE	TRUE	FALSE	FALSE	.	0	0	chr10	128270005	128270563	element_35	4	chr10	128270059	128271060
chr10	128277358	128278359	1	ENSMUSG00000040033	ENSMUST00000217852	Stat2	FALSE	FALSE	FALSE	TRUE	.	0	0	.	0	0	.	.	chr10	128277358	128278359
chr10	128270076	128271077	1	ENSMUSG00000040033	ENSMUST00000105238	Stat2	FALSE	TRUE	FALSE	FALSE	.	0	0	chr10	128270005	128270563	element_35	4	chr10	128270076	128271077
chr10	128283070	128284071	1	ENSMUSG00000040033	ENSMUST00000218862	Stat2	FALSE	FALSE	FALSE	TRUE	.	0	0	.	0	0	.	.	chr10	128283070	128284071
chr10	79820489	79821490	1	ENSMUSG00000035852	ENSMUST00000169041	Misp	FALSE	FALSE	FALSE	TRUE	.	0	0	.	0	0	.	.	chr10	79820489	79821490
chr10	79824187	79825188	1	ENSMUSG00000035852	ENSMUST00000219734	Misp	FALSE	FALSE	FALSE	TRUE	.	0	0	.	0	0	.	.	chr10	79824187	79825188
chr10	79822128	79823129	1	ENSMUSG00000035852	ENSMUST00000218687	Misp	FALSE	FALSE	FALSE	TRUE	.	0	0	.	0	0	.	.	chr10	79822128	79823129
chr10	79822127	79823128	1	ENSMUSG00000035852	ENSMUST00000046833	Misp	FALSE	FALSE	FALSE	TRUE	.	0	0	.	0	0	.	.	chr10	79822127	79823128
chr10	79828786	79829787	1	ENSMUSG00000035852	ENSMUST00000218531	Misp	FALSE	FALSE	FALSE	TRUE	.	0	0	.	0	0	.	.	chr10	79828786	79829787
chr10	79822058	79823059	1	ENSMUSG00000035852	ENSMUST00000219305	Misp	FALSE	FALSE	FALSE	TRUE	.	0	0	.	0	0	.	.	chr10	79822058	79823059
chr10	89873038	89874039	1	ENSMUSG00000058589	ENSMUST00000182936	Anks1b	FALSE	FALSE	FALSE	TRUE	.	0	0	.	0	0	.	.	chr10	89873038	89874039
chr10	89996043	89997044	1	ENSMUSG00000058589	ENSMUST00000183002	Anks1b	FALSE	FALSE	FALSE	TRUE	.	0	0	.	0	0	.	.	chr10	89996043	89997044
chr10	90575752	90576753	1	ENSMUSG00000058589	ENSMUST00000182427	Anks1b	FALSE	FALSE	FALSE	TRUE	.	0	0	.	0	0	.	.	chr10	90575752	90576753
chr10	89873009	89874010	1	ENSMUSG00000058589	ENSMUST00000183156	Anks1b	FALSE	FALSE	FALSE	TRUE	.	0	0	.	0	0	.	.	chr10	89873009	89874010
chr10	90070611	90071612	1	ENSMUSG00000058589	ENSMUST00000183109	Anks1b	FALSE	FALSE	FALSE	TRUE	.	0	0	.	0	0	.	.	chr10	90070611	90071612
chr10	90576218	90577219	1	ENSMUSG00000058589	ENSMUST00000182430	Anks1b	FALSE	FALSE	FALSE	TRUE	.	0	0	.	0	0	.	.	chr10	90576218	90577219
chr10	90576236	90577237	1	ENSMUSG00000058589	ENSMUST00000182960	Anks1b	FALSE	FALSE	FALSE	TRUE	.	0	0	.	0	0	.	.	chr10	90576236	90577237
chr10	90576266	90577267	1	ENSMUSG00000058589	ENSMUST00000182083	Anks1b	FALSE	FALSE	FALSE	TRUE	.	0	0	.	0	0	.	.	chr10	90576266	90577267
chr10	90575877	90576878	1	ENSMUSG00000058589	ENSMUST00000182053	Anks1b	FALSE	FALSE	FALSE	TRUE	.	0	0	.	0	0	.	.	chr10	90575877	90576878
chr10	90576112	90577113	1	ENSMUSG00000058589	ENSMUST00000182600	Anks1b	FALSE	FALSE	FALSE	TRUE	.	0	0	.	0	0	.	.	chr10	90576112	90577113
chr10	90046122	90047123	1	ENSMUSG00000058589	ENSMUST00000183012	Anks1b	FALSE	FALSE	FALSE	TRUE	.	0	0	.	0	0	.	.	chr10	90046122	90047123
chr10	90576301	90577302	1	ENSMUSG00000058589	ENSMUST00000183136	Anks1b	FALSE	FALSE	FALSE	TRUE	.	0	0	.	0	0	.	.	chr10	90576301	90577302
chr10	90575227	90576228	1	ENSMUSG00000058589	ENSMUST00000182356	Anks1b	FALSE	FALSE	FALSE	TRUE	.	0	0	.	0	0	.	.	chr10	90575227	90576228
chr10	90828928	90829929	1	ENSMUSG00000058589	ENSMUST00000182202	Anks1b	FALSE	FALSE	FALSE	TRUE	.	0	0	.	0	0	.	.	chr10	90828928	90829929
chr10	90829281	90830282	1	ENSMUSG00000058589	ENSMUST00000179337	Anks1b	FALSE	FALSE	FALSE	TRUE	.	0	0	.	0	0	.	.	chr10	90829281	90830282
chr10	90829319	90830320	1	ENSMUSG00000058589	ENSMUST00000182632	Anks1b	FALSE	FALSE	FALSE	TRUE	.	0	0	.	0	0	.	.	chr10	90829319	90830320
chr10	89873138	89874139	1	ENSMUSG00000058589	ENSMUST00000182907	Anks1b	FALSE	FALSE	FALSE	TRUE	.	0	0	.	0	0	.	.	chr10	89873138	89874139
chr10	90828934	90829935	1	ENSMUSG00000058589	ENSMUST00000182966	Anks1b	FALSE	FALSE	FALSE	TRUE	.	0	0	.	0	0	.	.	chr10	90828934	90829935
chr10	90576070	90577071	1	ENSMUSG00000058589	ENSMUST00000182786	Anks1b	FALSE	FALSE	FALSE	TRUE	.	0	0	.	0	0	.	.	chr10	90576070	90577071
chr10	90576249	90577250	1	ENSMUSG00000058589	ENSMUST00000182003	Anks1b	FALSE	FALSE	FALSE	TRUE	.	0	0	.	0	0	.	.	chr10	90576249	90577250
chr10	90576191	90577192	1	ENSMUSG00000058589	ENSMUST00000182284	Anks1b	FALSE	FALSE	FALSE	TRUE	.	0	0	.	0	0	.	.	chr10	90576191	90577192
chr10	90828621	90829622	1	ENSMUSG00000058589	ENSMUST00000183051	Anks1b	FALSE	FALSE	FALSE	TRUE	.	0	0	.	0	0	.	.	chr10	90828621	90829622
chr10	90576465	90577466	1	ENSMUSG00000058589	ENSMUST00000182550	Anks1b	FALSE	FALSE	FALSE	TRUE	.	0	0	.	0	0	.	.	chr10	90576465	90577466
chr10	90576250	90577251	1	ENSMUSG00000058589	ENSMUST00000182045	Anks1b	FALSE	FALSE	FALSE	TRUE	.	0	0	.	0	0	.	.	chr10	90576250	90577251
chr10	90576315	90577316	1	ENSMUSG00000058589	ENSMUST00000182595	Anks1b	FALSE	FALSE	FALSE	TRUE	.	0	0	.	0	0	.	.	chr10	90576315	90577316
chr10	90829066	90830067	1	ENSMUSG00000058589	ENSMUST00000179694	Anks1b	FALSE	FALSE	FALSE	TRUE	.	0	0	.	0	0	.	.	chr10	90829066	90830067
chr10	90894598	90895599	1	ENSMUSG00000058589	ENSMUST00000099366	Anks1b	FALSE	FALSE	FALSE	TRUE	.	0	0	.	0	0	.	.	chr10	90894598	90895599
chr10	90576017	90577018	1	ENSMUSG00000058589	ENSMUST00000182113	Anks1b	FALSE	FALSE	FALSE	TRUE	.	0	0	.	0	0	.	.	chr10	90576017	90577018
chr10	90576492	90577493	1	ENSMUSG00000058589	ENSMUST00000099364	Anks1b	FALSE	FALSE	FALSE	TRUE	.	0	0	.	0	0	.	.	chr10	90576492	90577493
chr10	90829343	90830344	1	ENSMUSG00000058589	ENSMUST00000183145	Anks1b	FALSE	FALSE	FALSE	TRUE	.	0	0	.	0	0	.	.	chr10	90829343	90830344
chr10	89873172	89874173	1	ENSMUSG00000058589	ENSMUST00000099368	Anks1b	FALSE	FALSE	FALSE	TRUE	.	0	0	.	0	0	.	.	chr10	89873172	89874173
chr10	90828611	90829612	1	ENSMUSG00000058589	ENSMUST00000182192	Anks1b	FALSE	FALSE	FALSE	TRUE	.	0	0	.	0	0	.	.	chr10	90828611	90829612
chr10	90894678	90895679	1	ENSMUSG00000058589	ENSMUST00000183024	Anks1b	FALSE	FALSE	FALSE	TRUE	.	0	0	.	0	0	.	.	chr10	90894678	90895679
chr10	22644511	22645512	1	ENSMUSG00000037490	ENSMUST00000042261	Slc2a12	FALSE	FALSE	FALSE	TRUE	.	0	0	.	0	0	.	.	chr10	22644511	22645512
chr10	22648508	22649509	1	ENSMUSG00000037490	ENSMUST00000159174	Slc2a12	FALSE	FALSE	FALSE	TRUE	.	0	0	.	0	0	.	.	chr10	22648508	22649509
chr10	50604251	50605252	1	ENSMUSG00000038774	ENSMUST00000219226	Ascc3	FALSE	FALSE	FALSE	TRUE	.	0	0	.	0	0	.	.	chr10	50604251	50605252
chr10	50592169	50593170	1	ENSMUSG00000038774	ENSMUST00000035606	Ascc3	FALSE	TRUE	FALSE	FALSE	.	0	0	chr10	50592153	50592565	element_39	4	chr10	50592169	50593170
chr10	50596316	50597317	1	ENSMUSG00000038774	ENSMUST00000220355	Ascc3	FALSE	FALSE	FALSE	TRUE	.	0	0	.	0	0	.	.	chr10	50596316	50597317
chr10	50763296	50764297	1	ENSMUSG00000038774	ENSMUST00000217725	Ascc3	FALSE	FALSE	FALSE	TRUE	.	0	0	.	0	0	.	.	chr10	50763296	50764297
chr10	50604272	50605273	1	ENSMUSG00000038774	ENSMUST00000220178	Ascc3	FALSE	FALSE	FALSE	TRUE	.	0	0	.	0	0	.	.	chr10	50604272	50605273
chr10	50648555	50649556	1	ENSMUSG00000038774	ENSMUST00000220026	Ascc3	FALSE	FALSE	FALSE	TRUE	.	0	0	.	0	0	.	.	chr10	50648555	50649556
chr10	50753341	50754342	1	ENSMUSG00000038774	ENSMUST00000219172	Ascc3	FALSE	FALSE	FALSE	TRUE	.	0	0	.	0	0	.	.	chr10	50753341	50754342
chr10	50641942	50642943	1	ENSMUSG00000038774	ENSMUST00000217968	Ascc3	FALSE	FALSE	FALSE	TRUE	.	0	0	.	0	0	.	.	chr10	50641942	50642943
chr10	50728458	50729459	1	ENSMUSG00000038774	ENSMUST00000219085	Ascc3	FALSE	FALSE	FALSE	TRUE	.	0	0	.	0	0	.	.	chr10	50728458	50729459
chr10	116950067	116951068	1	ENSMUSG00000112627	ENSMUST00000220251	4933412E12Rik	FALSE	FALSE	FALSE	TRUE	.	0	0	.	0	0	.	.	chr10	116950067	116951068
chr10	116950088	116951089	1	ENSMUSG00000112627	ENSMUST00000217853	4933412E12Rik	FALSE	FALSE	FALSE	TRUE	.	0	0	.	0	0	.	.	chr10	116950088	116951089
chr10	116949257	116950258	1	ENSMUSG00000112627	ENSMUST00000220066	4933412E12Rik	FALSE	FALSE	FALSE	TRUE	.	0	0	.	0	0	.	.	chr10	116949257	116950258
chr10	80105070	80106071	-1	ENSMUSG00000035673	ENSMUST00000218462	Sbno2	FALSE	FALSE	FALSE	TRUE	.	0	0	.	0	0	.	.	chr10	80105070	80106071
chr10	80074938	80075939	-1	ENSMUSG00000035673	ENSMUST00000217876	Sbno2	TRUE	FALSE	FALSE	FALSE	chr10	80075334	80075564	.	0	0	.	.	chr10	80074938	80075939
chr10	80103869	80104870	-1	ENSMUSG00000035673	ENSMUST00000219260	Sbno2	FALSE	FALSE	FALSE	TRUE	.	0	0	.	0	0	.	.	chr10	80103869	80104870
chr10	80102197	80103198	-1	ENSMUSG00000035673	ENSMUST00000219258	Sbno2	FALSE	FALSE	FALSE	TRUE	.	0	0	.	0	0	.	.	chr10	80102197	80103198
chr10	80074899	80075900	-1	ENSMUSG00000035673	ENSMUST00000218310	Sbno2	TRUE	FALSE	FALSE	FALSE	chr10	80075334	80075564	.	0	0	.	.	chr10	80074899	80075900
chr10	80102142	80103143	-1	ENSMUSG00000035673	ENSMUST00000217683	Sbno2	FALSE	FALSE	FALSE	TRUE	.	0	0	.	0	0	.	.	chr10	80102142	80103143
chr10	80074925	80075926	-1	ENSMUSG00000035673	ENSMUST00000217972	Sbno2	TRUE	FALSE	FALSE	FALSE	chr10	80075334	80075564	.	0	0	.	.	chr10	80074925	80075926
chr10	80102197	80103198	-1	ENSMUSG00000035673	ENSMUST00000042771	Sbno2	FALSE	FALSE	FALSE	TRUE	.	0	0	.	0	0	.	.	chr10	80102197	80103198
chr10	80100686	80101687	-1	ENSMUSG00000035673	ENSMUST00000218630	Sbno2	FALSE	FALSE	FALSE	TRUE	.	0	0	.	0	0	.	.	chr10	80100686	80101687
chr10	33950758	33951759	-1	ENSMUSG00000039531	ENSMUST00000218055	Zufsp	FALSE	FALSE	FALSE	TRUE	.	0	0	.	0	0	.	.	chr10	33950758	33951759
chr10	33950711	33951712	-1	ENSMUSG00000039531	ENSMUST00000219457	Zufsp	FALSE	FALSE	FALSE	TRUE	.	0	0	.	0	0	.	.	chr10	33950711	33951712
chr10	33949359	33950360	-1	ENSMUSG00000039531	ENSMUST00000218275	Zufsp	FALSE	FALSE	FALSE	TRUE	.	0	0	.	0	0	.	.	chr10	33949359	33950360
chr10	33950694	33951695	-1	ENSMUSG00000039531	ENSMUST00000218880	Zufsp	FALSE	FALSE	FALSE	TRUE	.	0	0	.	0	0	.	.	chr10	33950694	33951695
chr10	33950721	33951722	-1	ENSMUSG00000039531	ENSMUST00000048222	Zufsp	FALSE	FALSE	FALSE	TRUE	.	0	0	.	0	0	.	.	chr10	33950721	33951722
chr10	33950734	33951735	-1	ENSMUSG00000039531	ENSMUST00000218892	Zufsp	FALSE	FALSE	FALSE	TRUE	.	0	0	.	0	0	.	.	chr10	33950734	33951735
chr10	33950724	33951725	-1	ENSMUSG00000039531	ENSMUST00000218222	Zufsp	FALSE	FALSE	FALSE	TRUE	.	0	0	.	0	0	.	.	chr10	33950724	33951725
chr10	33950768	33951769	-1	ENSMUSG00000039531	ENSMUST00000219878	Zufsp	FALSE	FALSE	FALSE	TRUE	.	0	0	.	0	0	.	.	chr10	33950768	33951769
chr10	33932839	33933840	-1	ENSMUSG00000039531	ENSMUST00000219935	Zufsp	FALSE	FALSE	FALSE	TRUE	.	0	0	.	0	0	.	.	chr10	33932839	33933840
chr10	34127483	34128484	-1	ENSMUSG00000046031	ENSMUST00000062784	Fam26f	FALSE	FALSE	FALSE	TRUE	.	0	0	.	0	0	.	.	chr10	34127483	34128484
chr10	128179796	128180797	-1	ENSMUSG00000040043	ENSMUST00000099139	Rbms2	FALSE	FALSE	FALSE	TRUE	.	0	0	.	0	0	.	.	chr10	128179796	128180797
chr10	128143228	128144229	-1	ENSMUSG00000040043	ENSMUST00000218884	Rbms2	FALSE	FALSE	FALSE	TRUE	.	0	0	.	0	0	.	.	chr10	128143228	128144229
chr10	128133734	128134735	-1	ENSMUSG00000040043	ENSMUST00000217722	Rbms2	FALSE	FALSE	FALSE	TRUE	.	0	0	.	0	0	.	.	chr10	128133734	128134735
chr10	128175978	128176979	-1	ENSMUSG00000040043	ENSMUST00000092033	Rbms2	FALSE	FALSE	FALSE	TRUE	.	0	0	.	0	0	.	.	chr10	128175978	128176979
chr10	128137003	128138004	-1	ENSMUSG00000040043	ENSMUST00000217750	Rbms2	FALSE	FALSE	FALSE	TRUE	.	0	0	.	0	0	.	.	chr10	128137003	128138004
chr10	44148352	44149353	-1	ENSMUSG00000019866	ENSMUST00000200401	Crybg1	FALSE	FALSE	FALSE	TRUE	.	0	0	.	0	0	.	.	chr10	44148352	44149353
chr10	44003868	44004869	-1	ENSMUSG00000019866	ENSMUST00000020017	Crybg1	FALSE	FALSE	FALSE	TRUE	.	0	0	.	0	0	.	.	chr10	44003868	44004869
chr10	30802606	30803607	-1	ENSMUSG00000039697	ENSMUST00000068567	Ncoa7	FALSE	FALSE	FALSE	TRUE	.	0	0	.	0	0	.	.	chr10	30802606	30803607
chr10	30802825	30803826	-1	ENSMUSG00000039697	ENSMUST00000215725	Ncoa7	FALSE	FALSE	FALSE	TRUE	.	0	0	.	0	0	.	.	chr10	30802825	30803826
chr10	30771440	30772441	-1	ENSMUSG00000039697	ENSMUST00000215740	Ncoa7	FALSE	FALSE	FALSE	TRUE	.	0	0	.	0	0	.	.	chr10	30771440	30772441
chr10	30655335	30656336	-1	ENSMUSG00000039697	ENSMUST00000217138	Ncoa7	FALSE	FALSE	FALSE	TRUE	.	0	0	.	0	0	.	.	chr10	30655335	30656336
chr10	30655266	30656267	-1	ENSMUSG00000039697	ENSMUST00000213889	Ncoa7	FALSE	FALSE	FALSE	TRUE	.	0	0	.	0	0	.	.	chr10	30655266	30656267
chr10	30771339	30772340	-1	ENSMUSG00000039697	ENSMUST00000215926	Ncoa7	FALSE	FALSE	FALSE	TRUE	.	0	0	.	0	0	.	.	chr10	30771339	30772340
chr10	30655282	30656283	-1	ENSMUSG00000039697	ENSMUST00000092610	Ncoa7	FALSE	FALSE	FALSE	TRUE	.	0	0	.	0	0	.	.	chr10	30655282	30656283
chr10	30722204	30723205	-1	ENSMUSG00000039697	ENSMUST00000217398	Ncoa7	FALSE	FALSE	FALSE	TRUE	.	0	0	.	0	0	.	.	chr10	30722204	30723205
chr10	30655290	30656291	-1	ENSMUSG00000039697	ENSMUST00000213897	Ncoa7	FALSE	FALSE	FALSE	TRUE	.	0	0	.	0	0	.	.	chr10	30655290	30656291
chr10	30655336	30656337	-1	ENSMUSG00000039697	ENSMUST00000217644	Ncoa7	FALSE	FALSE	FALSE	TRUE	.	0	0	.	0	0	.	.	chr10	30655336	30656337
chr10	30655366	30656367	-1	ENSMUSG00000039697	ENSMUST00000216172	Ncoa7	FALSE	FALSE	FALSE	TRUE	.	0	0	.	0	0	.	.	chr10	30655366	30656367
chr10	30771341	30772342	-1	ENSMUSG00000039697	ENSMUST00000213836	Ncoa7	FALSE	FALSE	FALSE	TRUE	.	0	0	.	0	0	.	.	chr10	30771341	30772342
chr11	82045212	82046213	1	ENSMUSG00000035373	ENSMUST00000021011	Ccl7	FALSE	FALSE	FALSE	TRUE	.	0	0	.	0	0	.	.	chr11	82045212	82046213
chr11	82057323	82058324	1	ENSMUSG00000020676	ENSMUST00000000342	Ccl11	FALSE	FALSE	FALSE	TRUE	.	0	0	.	0	0	.	.	chr11	82057323	82058324
chr11	72842494	72843495	1	ENSMUSG00000055670	ENSMUST00000145393	Zzef1	FALSE	FALSE	FALSE	TRUE	.	0	0	.	0	0	.	.	chr11	72842494	72843495
chr11	72911796	72912797	1	ENSMUSG00000055670	ENSMUST00000152481	Zzef1	FALSE	FALSE	FALSE	TRUE	.	0	0	.	0	0	.	.	chr11	72911796	72912797
chr11	72795726	72796727	1	ENSMUSG00000055670	ENSMUST00000172220	Zzef1	FALSE	FALSE	FALSE	TRUE	.	0	0	.	0	0	.	.	chr11	72795726	72796727
chr11	72920343	72921344	1	ENSMUSG00000055670	ENSMUST00000125122	Zzef1	FALSE	FALSE	FALSE	TRUE	.	0	0	.	0	0	.	.	chr11	72920343	72921344
chr11	72795754	72796755	1	ENSMUSG00000055670	ENSMUST00000207107	Zzef1	FALSE	FALSE	FALSE	TRUE	.	0	0	.	0	0	.	.	chr11	72795754	72796755
chr11	72795726	72796727	1	ENSMUSG00000055670	ENSMUST00000150551	Zzef1	FALSE	FALSE	FALSE	TRUE	.	0	0	.	0	0	.	.	chr11	72795726	72796727
chr11	72795726	72796727	1	ENSMUSG00000055670	ENSMUST00000069395	Zzef1	FALSE	FALSE	FALSE	TRUE	.	0	0	.	0	0	.	.	chr11	72795726	72796727
chr11	72914443	72915444	1	ENSMUSG00000055670	ENSMUST00000152063	Zzef1	FALSE	FALSE	FALSE	TRUE	.	0	0	.	0	0	.	.	chr11	72914443	72915444
chr11	82035110	82036111	1	ENSMUSG00000035385	ENSMUST00000124479	Ccl2	FALSE	FALSE	FALSE	TRUE	.	0	0	.	0	0	.	.	chr11	82035110	82036111
chr11	82035071	82036072	1	ENSMUSG00000035385	ENSMUST00000000193	Ccl2	FALSE	FALSE	FALSE	TRUE	.	0	0	.	0	0	.	.	chr11	82035071	82036072
chr11	72711657	72712658	1	ENSMUSG00000020790	ENSMUST00000102548	Ankfy1	FALSE	FALSE	FALSE	TRUE	.	0	0	.	0	0	.	.	chr11	72711657	72712658
chr11	72689506	72690507	1	ENSMUSG00000020790	ENSMUST00000127610	Ankfy1	FALSE	TRUE	FALSE	FALSE	.	0	0	chr11	72690183	72690594	element_77	4	chr11	72689506	72690507
chr11	72763967	72764968	1	ENSMUSG00000020790	ENSMUST00000132889	Ankfy1	FALSE	FALSE	FALSE	TRUE	.	0	0	.	0	0	.	.	chr11	72763967	72764968
chr11	72689506	72690507	1	ENSMUSG00000020790	ENSMUST00000150172	Ankfy1	FALSE	TRUE	FALSE	FALSE	.	0	0	chr11	72690183	72690594	element_77	4	chr11	72689506	72690507
chr11	72689506	72690507	1	ENSMUSG00000020790	ENSMUST00000155998	Ankfy1	FALSE	TRUE	FALSE	FALSE	.	0	0	chr11	72690183	72690594	element_77	4	chr11	72689506	72690507
chr11	72759416	72760417	1	ENSMUSG00000020790	ENSMUST00000147195	Ankfy1	FALSE	FALSE	FALSE	TRUE	.	0	0	.	0	0	.	.	chr11	72759416	72760417
chr11	83064612	83065613	1	ENSMUSG00000072620	ENSMUST00000038038	Slfn2	FALSE	FALSE	FALSE	TRUE	.	0	0	.	0	0	.	.	chr11	83064612	83065613
chr11	72301165	72302166	1	ENSMUSG00000040483	ENSMUST00000142921	Xaf1	FALSE	TRUE	FALSE	FALSE	.	0	0	chr11	72301449	72301845	element_76	1	chr11	72301165	72302166
chr11	72301129	72302130	1	ENSMUSG00000040483	ENSMUST00000151440	Xaf1	FALSE	TRUE	FALSE	FALSE	.	0	0	chr11	72301449	72301845	element_76	1	chr11	72301129	72302130
chr11	72301139	72302140	1	ENSMUSG00000040483	ENSMUST00000140842	Xaf1	FALSE	TRUE	FALSE	FALSE	.	0	0	chr11	72301449	72301845	element_76	1	chr11	72301139	72302140
chr11	72301130	72302131	1	ENSMUSG00000040483	ENSMUST00000146233	Xaf1	FALSE	TRUE	FALSE	FALSE	.	0	0	chr11	72301449	72301845	element_76	1	chr11	72301130	72302131
chr11	72301163	72302164	1	ENSMUSG00000040483	ENSMUST00000094041	Xaf1	FALSE	TRUE	FALSE	FALSE	.	0	0	chr11	72301449	72301845	element_76	1	chr11	72301163	72302164
chr11	58187239	58188240	1	ENSMUSG00000082292	ENSMUST00000119467	Gm12250	FALSE	FALSE	FALSE	TRUE	.	0	0	.	0	0	.	.	chr11	58187239	58188240
chr11	58214508	58215509	1	ENSMUSG00000069874	ENSMUST00000209079	Irgm2	FALSE	TRUE	FALSE	FALSE	.	0	0	chr11	58214690	58215094	element_75	3	chr11	58214508	58215509
chr11	58199118	58200119	1	ENSMUSG00000069874	ENSMUST00000058704	Irgm2	FALSE	TRUE	FALSE	FALSE	.	0	0	chr11	58199332	58199654	element_73	2	chr11	58199118	58200119
chr11	58214528	58215529	1	ENSMUSG00000069874	ENSMUST00000108836	Irgm2	FALSE	TRUE	FALSE	FALSE	.	0	0	chr11	58214690	58215094	element_75	3	chr11	58214528	58215529
chr11	58199088	58200089	1	ENSMUSG00000078853	ENSMUST00000168280	Igtp	FALSE	TRUE	FALSE	FALSE	.	0	0	chr11	58199332	58199654	element_73	2	chr11	58199088	58200089
chr11	58199086	58200087	1	ENSMUSG00000078853	ENSMUST00000094169	Igtp	FALSE	TRUE	FALSE	FALSE	.	0	0	chr11	58199332	58199654	element_73	2	chr11	58199086	58200087
chr11	58199056	58200057	1	ENSMUSG00000078853	ENSMUST00000035266	Igtp	FALSE	TRUE	FALSE	FALSE	.	0	0	chr11	58199332	58199654	element_73	2	chr11	58199056	58200057
chr11	29130244	29131245	1	ENSMUSG00000020464	ENSMUST00000154924	Pnpt1	FALSE	TRUE	FALSE	FALSE	.	0	0	chr11	29130360	29130874	element_59	4	chr11	29130244	29131245
chr11	29137687	29138688	1	ENSMUSG00000020464	ENSMUST00000131527	Pnpt1	FALSE	FALSE	FALSE	TRUE	.	0	0	.	0	0	.	.	chr11	29137687	29138688
chr11	29130248	29131249	1	ENSMUSG00000020464	ENSMUST00000148173	Pnpt1	FALSE	TRUE	FALSE	FALSE	.	0	0	chr11	29130360	29130874	element_59	4	chr11	29130248	29131249
chr11	29130248	29131249	1	ENSMUSG00000020464	ENSMUST00000020756	Pnpt1	FALSE	TRUE	FALSE	FALSE	.	0	0	chr11	29130360	29130874	element_59	4	chr11	29130248	29131249
chr11	102434806	102435807	1	ENSMUSG00000034708	ENSMUST00000127530	Grn	FALSE	FALSE	FALSE	TRUE	.	0	0	.	0	0	.	.	chr11	102434806	102435807
chr11	102433599	102434600	1	ENSMUSG00000034708	ENSMUST00000176953	Grn	FALSE	FALSE	FALSE	TRUE	.	0	0	.	0	0	.	.	chr11	102433599	102434600
chr11	102429815	102430816	1	ENSMUSG00000034708	ENSMUST00000049460	Grn	FALSE	FALSE	FALSE	TRUE	.	0	0	.	0	0	.	.	chr11	102429815	102430816
chr11	102432285	102433286	1	ENSMUSG00000034708	ENSMUST00000135517	Grn	FALSE	FALSE	FALSE	TRUE	.	0	0	.	0	0	.	.	chr11	102432285	102433286
chr11	102430018	102431019	1	ENSMUSG00000034708	ENSMUST00000129997	Grn	FALSE	FALSE	FALSE	TRUE	.	0	0	.	0	0	.	.	chr11	102430018	102431019
chr11	102434218	102435219	1	ENSMUSG00000034708	ENSMUST00000123500	Grn	FALSE	FALSE	FALSE	TRUE	.	0	0	.	0	0	.	.	chr11	102434218	102435219
chr11	102433432	102434433	1	ENSMUSG00000034708	ENSMUST00000148580	Grn	FALSE	FALSE	FALSE	TRUE	.	0	0	.	0	0	.	.	chr11	102433432	102434433
chr11	102433602	102434603	1	ENSMUSG00000034708	ENSMUST00000138451	Grn	FALSE	FALSE	FALSE	TRUE	.	0	0	.	0	0	.	.	chr11	102433602	102434603
chr11	102434916	102435917	1	ENSMUSG00000034708	ENSMUST00000177428	Grn	FALSE	FALSE	FALSE	TRUE	.	0	0	.	0	0	.	.	chr11	102434916	102435917
chr11	102434785	102435786	1	ENSMUSG00000034708	ENSMUST00000125819	Grn	FALSE	FALSE	FALSE	TRUE	.	0	0	.	0	0	.	.	chr11	102434785	102435786
chr11	80183723	80184724	1	ENSMUSG00000020707	ENSMUST00000134909	Rnf135	FALSE	FALSE	FALSE	TRUE	.	0	0	.	0	0	.	.	chr11	80183723	80184724
chr11	80183351	80184352	1	ENSMUSG00000020707	ENSMUST00000017839	Rnf135	FALSE	FALSE	FALSE	TRUE	.	0	0	.	0	0	.	.	chr11	80183351	80184352
chr11	101581744	101582745	1	ENSMUSG00000034947	ENSMUST00000143045	Tmem106a	FALSE	FALSE	FALSE	TRUE	.	0	0	.	0	0	.	.	chr11	101581744	101582745
chr11	101581757	101582758	1	ENSMUSG00000034947	ENSMUST00000107194	Tmem106a	FALSE	FALSE	FALSE	TRUE	.	0	0	.	0	0	.	.	chr11	101581757	101582758
chr11	101581800	101582801	1	ENSMUSG00000034947	ENSMUST00000128614	Tmem106a	FALSE	FALSE	FALSE	TRUE	.	0	0	.	0	0	.	.	chr11	101581800	101582801
chr11	101581742	101582743	1	ENSMUSG00000034947	ENSMUST00000039581	Tmem106a	FALSE	FALSE	FALSE	TRUE	.	0	0	.	0	0	.	.	chr11	101581742	101582743
chr11	101581742	101582743	1	ENSMUSG00000034947	ENSMUST00000100403	Tmem106a	FALSE	FALSE	FALSE	TRUE	.	0	0	.	0	0	.	.	chr11	101581742	101582743
chr11	101585497	101586498	1	ENSMUSG00000034947	ENSMUST00000128659	Tmem106a	FALSE	FALSE	FALSE	TRUE	.	0	0	.	0	0	.	.	chr11	101585497	101586498
chr11	119477557	119478558	1	ENSMUSG00000070327	ENSMUST00000172235	Rnf213	FALSE	FALSE	FALSE	TRUE	.	0	0	.	0	0	.	.	chr11	119477557	119478558
chr11	119392600	119393601	1	ENSMUSG00000070327	ENSMUST00000131035	Rnf213	FALSE	TRUE	FALSE	FALSE	.	0	0	chr11	119392769	119393465	element_54	1	chr11	119392600	119393601
chr11	119392600	119393601	1	ENSMUSG00000070327	ENSMUST00000093902	Rnf213	FALSE	TRUE	FALSE	FALSE	.	0	0	chr11	119392769	119393465	element_54	1	chr11	119392600	119393601
chr11	82951602	82952603	1	ENSMUSG00000054404	ENSMUST00000067443	Slfn5	FALSE	FALSE	FALSE	TRUE	.	0	0	.	0	0	.	.	chr11	82951602	82952603
chr11	82954161	82955162	1	ENSMUSG00000054404	ENSMUST00000108157	Slfn5	FALSE	FALSE	FALSE	TRUE	.	0	0	.	0	0	.	.	chr11	82954161	82955162
chr11	82950849	82951850	1	ENSMUSG00000054404	ENSMUST00000150687	Slfn5	FALSE	FALSE	FALSE	TRUE	.	0	0	.	0	0	.	.	chr11	82950849	82951850
chr11	82951595	82952596	1	ENSMUSG00000054404	ENSMUST00000108158	Slfn5	FALSE	FALSE	FALSE	TRUE	.	0	0	.	0	0	.	.	chr11	82951595	82952596
chr11	49086200	49087201	1	ENSMUSG00000078920	ENSMUST00000152914	Ifi47	FALSE	TRUE	FALSE	FALSE	.	0	0	chr11	49086763	49087181	element_67	3	chr11	49086200	49087201
chr11	49086568	49087569	1	ENSMUSG00000078920	ENSMUST00000214804	Ifi47	FALSE	TRUE	FALSE	FALSE	.	0	0	chr11	49086763	49087181	element_67	3	chr11	49086568	49087569
chr11	49076087	49077088	1	ENSMUSG00000078920	ENSMUST00000109202	Ifi47	FALSE	FALSE	FALSE	TRUE	.	0	0	.	0	0	.	.	chr11	49076087	49077088
chr11	49087764	49088765	1	ENSMUSG00000078920	ENSMUST00000213728	Ifi47	FALSE	FALSE	FALSE	TRUE	.	0	0	.	0	0	.	.	chr11	49087764	49088765
chr11	49086539	49087540	1	ENSMUSG00000078920	ENSMUST00000046704	Ifi47	FALSE	TRUE	FALSE	FALSE	.	0	0	chr11	49086763	49087181	element_67	3	chr11	49086539	49087540
chr11	88998876	88999877	1	ENSMUSG00000000275	ENSMUST00000107896	Trim25	FALSE	TRUE	FALSE	FALSE	.	0	0	chr11	88999227	88999649	element_87	1	chr11	88998876	88999877
chr11	88998876	88999877	1	ENSMUSG00000000275	ENSMUST00000100627	Trim25	FALSE	TRUE	FALSE	FALSE	.	0	0	chr11	88999227	88999649	element_87	1	chr11	88998876	88999877
chr11	88998876	88999877	1	ENSMUSG00000000275	ENSMUST00000000284	Trim25	FALSE	TRUE	FALSE	FALSE	.	0	0	chr11	88999227	88999649	element_87	1	chr11	88998876	88999877
chr11	21090791	21091792	1	ENSMUSG00000020134	ENSMUST00000156122	Peli1	FALSE	FALSE	FALSE	TRUE	.	0	0	.	0	0	.	.	chr11	21090791	21091792
chr11	21090791	21091792	1	ENSMUSG00000020134	ENSMUST00000093290	Peli1	FALSE	FALSE	FALSE	TRUE	.	0	0	.	0	0	.	.	chr11	21090791	21091792
chr11	21091618	21092619	1	ENSMUSG00000020134	ENSMUST00000149675	Peli1	FALSE	FALSE	FALSE	TRUE	.	0	0	.	0	0	.	.	chr11	21091618	21092619
chr11	21134969	21135970	1	ENSMUSG00000020134	ENSMUST00000101477	Peli1	FALSE	FALSE	FALSE	TRUE	.	0	0	.	0	0	.	.	chr11	21134969	21135970
chr11	21312005	21313006	1	ENSMUSG00000020128	ENSMUST00000153411	Vps54	FALSE	FALSE	FALSE	TRUE	.	0	0	.	0	0	.	.	chr11	21312005	21313006
chr11	21268285	21269286	1	ENSMUSG00000020128	ENSMUST00000132017	Vps54	FALSE	FALSE	FALSE	TRUE	.	0	0	.	0	0	.	.	chr11	21268285	21269286
chr11	21238781	21239782	1	ENSMUSG00000020128	ENSMUST00000109578	Vps54	FALSE	FALSE	FALSE	TRUE	.	0	0	.	0	0	.	.	chr11	21238781	21239782
chr11	21238781	21239782	1	ENSMUSG00000020128	ENSMUST00000006221	Vps54	FALSE	FALSE	FALSE	TRUE	.	0	0	.	0	0	.	.	chr11	21238781	21239782
chr11	21299764	21300765	1	ENSMUSG00000020128	ENSMUST00000143932	Vps54	FALSE	FALSE	FALSE	TRUE	.	0	0	.	0	0	.	.	chr11	21299764	21300765
chr11	21313581	21314582	1	ENSMUSG00000020128	ENSMUST00000153159	Vps54	FALSE	FALSE	FALSE	TRUE	.	0	0	.	0	0	.	.	chr11	21313581	21314582
chr11	21277403	21278404	1	ENSMUSG00000020128	ENSMUST00000132146	Vps54	FALSE	FALSE	FALSE	TRUE	.	0	0	.	0	0	.	.	chr11	21277403	21278404
chr11	53769514	53770515	1	ENSMUSG00000018899	ENSMUST00000108920	Irf1	FALSE	TRUE	FALSE	FALSE	.	0	0	chr11	53769774	53770075	element_71	1	chr11	53769514	53770515
chr11	53769571	53770572	1	ENSMUSG00000018899	ENSMUST00000128336	Irf1	FALSE	TRUE	FALSE	FALSE	.	0	0	chr11	53769774	53770075	element_71	1	chr11	53769571	53770572
chr11	53769605	53770606	1	ENSMUSG00000018899	ENSMUST00000142221	Irf1	FALSE	TRUE	FALSE	FALSE	.	0	0	chr11	53769774	53770075	element_71	1	chr11	53769605	53770606
chr11	53772653	53773654	1	ENSMUSG00000018899	ENSMUST00000153054	Irf1	FALSE	FALSE	FALSE	TRUE	.	0	0	.	0	0	.	.	chr11	53772653	53773654
chr11	53769987	53770988	1	ENSMUSG00000018899	ENSMUST00000123376	Irf1	FALSE	TRUE	FALSE	FALSE	.	0	0	chr11	53769774	53770075	element_71	1	chr11	53769987	53770988
chr11	53769551	53770552	1	ENSMUSG00000018899	ENSMUST00000108922	Irf1	FALSE	TRUE	FALSE	FALSE	.	0	0	chr11	53769774	53770075	element_71	1	chr11	53769551	53770552
chr11	53769548	53770549	1	ENSMUSG00000018899	ENSMUST00000140866	Irf1	FALSE	TRUE	FALSE	FALSE	.	0	0	chr11	53769774	53770075	element_71	1	chr11	53769548	53770549
chr11	53769977	53770978	1	ENSMUSG00000018899	ENSMUST00000138913	Irf1	FALSE	TRUE	FALSE	FALSE	.	0	0	chr11	53769774	53770075	element_71	1	chr11	53769977	53770978
chr11	53769995	53770996	1	ENSMUSG00000018899	ENSMUST00000019043	Irf1	FALSE	TRUE	FALSE	FALSE	.	0	0	chr11	53769774	53770075	element_71	1	chr11	53769995	53770996
chr11	53770009	53771010	1	ENSMUSG00000018899	ENSMUST00000133291	Irf1	FALSE	TRUE	FALSE	FALSE	.	0	0	chr11	53769774	53770075	element_71	1	chr11	53770009	53771010
chr11	101447907	101448908	1	ENSMUSG00000010358	ENSMUST00000010502	Ifi35	FALSE	TRUE	FALSE	FALSE	.	0	0	chr11	101448260	101448643	element_48	1	chr11	101447907	101448908
chr11	101448070	101449071	1	ENSMUSG00000010358	ENSMUST00000131024	Ifi35	FALSE	TRUE	FALSE	FALSE	.	0	0	chr11	101448260	101448643	element_48	1	chr11	101448070	101449071
chr11	101447944	101448945	1	ENSMUSG00000010358	ENSMUST00000125958	Ifi35	FALSE	TRUE	FALSE	FALSE	.	0	0	chr11	101448260	101448643	element_48	1	chr11	101447944	101448945
chr11	49608763	49609764	1	ENSMUSG00000020357	ENSMUST00000152253	Flt4	FALSE	FALSE	FALSE	TRUE	.	0	0	.	0	0	.	.	chr11	49608763	49609764
chr11	49608763	49609764	1	ENSMUSG00000020357	ENSMUST00000020617	Flt4	FALSE	FALSE	FALSE	TRUE	.	0	0	.	0	0	.	.	chr11	49608763	49609764
chr11	3331609	3332610	1	ENSMUSG00000034614	ENSMUST00000138907	Pik3ip1	FALSE	FALSE	FALSE	TRUE	.	0	0	.	0	0	.	.	chr11	3331609	3332610
chr11	3331951	3332952	1	ENSMUSG00000034614	ENSMUST00000136474	Pik3ip1	FALSE	FALSE	FALSE	TRUE	.	0	0	.	0	0	.	.	chr11	3331951	3332952
chr11	3331572	3332573	1	ENSMUSG00000034614	ENSMUST00000142961	Pik3ip1	FALSE	FALSE	FALSE	TRUE	.	0	0	.	0	0	.	.	chr11	3331572	3332573
chr11	3330228	3331229	1	ENSMUSG00000034614	ENSMUST00000149253	Pik3ip1	FALSE	FALSE	FALSE	TRUE	.	0	0	.	0	0	.	.	chr11	3330228	3331229
chr11	3330293	3331294	1	ENSMUSG00000034614	ENSMUST00000153733	Pik3ip1	FALSE	FALSE	FALSE	TRUE	.	0	0	.	0	0	.	.	chr11	3330293	3331294
chr11	3329901	3330902	1	ENSMUSG00000034614	ENSMUST00000045153	Pik3ip1	FALSE	FALSE	FALSE	TRUE	.	0	0	.	0	0	.	.	chr11	3329901	3330902
chr11	3330287	3331288	1	ENSMUSG00000034614	ENSMUST00000136536	Pik3ip1	FALSE	FALSE	FALSE	TRUE	.	0	0	.	0	0	.	.	chr11	3330287	3331288
chr11	3333881	3334882	1	ENSMUSG00000034614	ENSMUST00000130747	Pik3ip1	FALSE	FALSE	FALSE	TRUE	.	0	0	.	0	0	.	.	chr11	3333881	3334882
chr11	3332472	3333473	1	ENSMUSG00000034614	ENSMUST00000139139	Pik3ip1	FALSE	FALSE	FALSE	TRUE	.	0	0	.	0	0	.	.	chr11	3332472	3333473
chr11	3330308	3331309	1	ENSMUSG00000034614	ENSMUST00000093399	Pik3ip1	FALSE	FALSE	FALSE	TRUE	.	0	0	.	0	0	.	.	chr11	3330308	3331309
chr11	48978389	48979390	1	ENSMUSG00000040328	ENSMUST00000179282	Olfr56	FALSE	FALSE	FALSE	TRUE	.	0	0	.	0	0	.	.	chr11	48978389	48979390
chr11	49086552	49087553	1	ENSMUSG00000040328	ENSMUST00000203810	Olfr56	FALSE	TRUE	FALSE	FALSE	.	0	0	chr11	49086763	49087181	element_67	3	chr11	49086552	49087553
chr11	49086552	49087553	1	ENSMUSG00000040328	ENSMUST00000203149	Olfr56	FALSE	TRUE	FALSE	FALSE	.	0	0	chr11	49086763	49087181	element_67	3	chr11	49086552	49087553
chr11	49086534	49087535	1	ENSMUSG00000040328	ENSMUST00000203412	Olfr56	FALSE	TRUE	FALSE	FALSE	.	0	0	chr11	49086763	49087181	element_67	3	chr11	49086534	49087535
chr11	49050233	49051234	1	ENSMUSG00000040328	ENSMUST00000102785	Olfr56	FALSE	FALSE	FALSE	TRUE	.	0	0	.	0	0	.	.	chr11	49050233	49051234
chr11	48978389	48979390	1	ENSMUSG00000040328	ENSMUST00000056759	Olfr56	FALSE	FALSE	FALSE	TRUE	.	0	0	.	0	0	.	.	chr11	48978389	48979390
chr11	78984423	78985424	-1	ENSMUSG00000001123	ENSMUST00000108269	Lgals9	FALSE	FALSE	FALSE	TRUE	.	0	0	.	0	0	.	.	chr11	78984423	78985424
chr11	78984330	78985331	-1	ENSMUSG00000001123	ENSMUST00000073001	Lgals9	FALSE	FALSE	FALSE	TRUE	.	0	0	.	0	0	.	.	chr11	78984330	78985331
chr11	78969829	78970830	-1	ENSMUSG00000001123	ENSMUST00000140073	Lgals9	FALSE	FALSE	FALSE	TRUE	.	0	0	.	0	0	.	.	chr11	78969829	78970830
chr11	78984445	78985446	-1	ENSMUSG00000001123	ENSMUST00000108268	Lgals9	FALSE	FALSE	FALSE	TRUE	.	0	0	.	0	0	.	.	chr11	78984445	78985446
chr11	82990636	82991637	-1	ENSMUSG00000069793	ENSMUST00000138797	Slfn9	FALSE	FALSE	FALSE	TRUE	.	0	0	.	0	0	.	.	chr11	82990636	82991637
chr11	82991329	82992330	-1	ENSMUSG00000069793	ENSMUST00000038211	Slfn9	FALSE	TRUE	FALSE	FALSE	.	0	0	chr11	82991795	82992019	element_83	3	chr11	82991329	82992330
chr11	82991328	82992329	-1	ENSMUSG00000069793	ENSMUST00000092840	Slfn9	FALSE	TRUE	FALSE	FALSE	.	0	0	chr11	82991795	82992019	element_83	3	chr11	82991328	82992329
chr11	117969546	117970547	-1	ENSMUSG00000053113	ENSMUST00000123255	Socs3	FALSE	FALSE	FALSE	TRUE	.	0	0	.	0	0	.	.	chr11	117969546	117970547
chr11	117968950	117969951	-1	ENSMUSG00000053113	ENSMUST00000132295	Socs3	TRUE	FALSE	FALSE	FALSE	chr11	117969102	117969542	.	0	0	.	.	chr11	117968950	117969951
chr11	117968685	117969686	-1	ENSMUSG00000053113	ENSMUST00000054002	Socs3	TRUE	FALSE	FALSE	FALSE	chr11	117969102	117969542	.	0	0	.	.	chr11	117968685	117969686
chr11	83017214	83018215	-1	ENSMUSG00000035208	ENSMUST00000215239	Slfn8	FALSE	FALSE	FALSE	TRUE	.	0	0	.	0	0	.	.	chr11	83017214	83018215
chr11	83016679	83017680	-1	ENSMUSG00000035208	ENSMUST00000131883	Slfn8	FALSE	FALSE	FALSE	TRUE	.	0	0	.	0	0	.	.	chr11	83016679	83017680
chr11	83020309	83021310	-1	ENSMUSG00000035208	ENSMUST00000092838	Slfn8	FALSE	FALSE	FALSE	TRUE	.	0	0	.	0	0	.	.	chr11	83020309	83021310
chr11	83019607	83020608	-1	ENSMUSG00000035208	ENSMUST00000130822	Slfn8	FALSE	FALSE	FALSE	TRUE	.	0	0	.	0	0	.	.	chr11	83019607	83020608
chr11	83020309	83021310	-1	ENSMUSG00000035208	ENSMUST00000038141	Slfn8	FALSE	FALSE	FALSE	TRUE	.	0	0	.	0	0	.	.	chr11	83020309	83021310
chr11	83020221	83021222	-1	ENSMUSG00000035208	ENSMUST00000108152	Slfn8	FALSE	FALSE	FALSE	TRUE	.	0	0	.	0	0	.	.	chr11	83020221	83021222
chr11	83039541	83040542	-1	ENSMUSG00000072621	ENSMUST00000100716	Slfn10-ps	FALSE	FALSE	FALSE	TRUE	.	0	0	.	0	0	.	.	chr11	83039541	83040542
chr11	83035665	83036666	-1	ENSMUSG00000072621	ENSMUST00000152760	Slfn10-ps	FALSE	FALSE	FALSE	TRUE	.	0	0	.	0	0	.	.	chr11	83035665	83036666
chr11	43425716	43426717	-1	ENSMUSG00000020415	ENSMUST00000118368	Pttg1	FALSE	FALSE	FALSE	TRUE	.	0	0	.	0	0	.	.	chr11	43425716	43426717
chr11	43425480	43426481	-1	ENSMUSG00000020415	ENSMUST00000152115	Pttg1	FALSE	FALSE	FALSE	TRUE	.	0	0	.	0	0	.	.	chr11	43425480	43426481
chr11	43422485	43423486	-1	ENSMUSG00000020415	ENSMUST00000140434	Pttg1	FALSE	FALSE	FALSE	TRUE	.	0	0	.	0	0	.	.	chr11	43422485	43423486
chr11	43425750	43426751	-1	ENSMUSG00000020415	ENSMUST00000020687	Pttg1	FALSE	FALSE	FALSE	TRUE	.	0	0	.	0	0	.	.	chr11	43425750	43426751
chr11	43425712	43426713	-1	ENSMUSG00000020415	ENSMUST00000148130	Pttg1	FALSE	FALSE	FALSE	TRUE	.	0	0	.	0	0	.	.	chr11	43425712	43426713
chr11	43425726	43426727	-1	ENSMUSG00000020415	ENSMUST00000020685	Pttg1	FALSE	FALSE	FALSE	TRUE	.	0	0	.	0	0	.	.	chr11	43425726	43426727
chr11	43425701	43426702	-1	ENSMUSG00000020415	ENSMUST00000101340	Pttg1	FALSE	FALSE	FALSE	TRUE	.	0	0	.	0	0	.	.	chr11	43425701	43426702
chr11	43425480	43426481	-1	ENSMUSG00000020415	ENSMUST00000117446	Pttg1	FALSE	FALSE	FALSE	TRUE	.	0	0	.	0	0	.	.	chr11	43425480	43426481
chr11	43425462	43426463	-1	ENSMUSG00000020415	ENSMUST00000121638	Pttg1	FALSE	FALSE	FALSE	TRUE	.	0	0	.	0	0	.	.	chr11	43425462	43426463
chr11	43425617	43426618	-1	ENSMUSG00000020415	ENSMUST00000150726	Pttg1	FALSE	FALSE	FALSE	TRUE	.	0	0	.	0	0	.	.	chr11	43425617	43426618
chr11	118397650	118398651	-1	ENSMUSG00000033880	ENSMUST00000144529	Lgals3bp	FALSE	FALSE	FALSE	TRUE	.	0	0	.	0	0	.	.	chr11	118397650	118398651
chr11	118401371	118402372	-1	ENSMUSG00000033880	ENSMUST00000141459	Lgals3bp	FALSE	TRUE	FALSE	FALSE	.	0	0	chr11	118401808	118402154	element_52	1	chr11	118401371	118402372
chr11	118401591	118402592	-1	ENSMUSG00000033880	ENSMUST00000043722	Lgals3bp	FALSE	TRUE	FALSE	FALSE	.	0	0	chr11	118401808	118402154	element_52	1	chr11	118401591	118402592
chr11	118401351	118402352	-1	ENSMUSG00000033880	ENSMUST00000106290	Lgals3bp	FALSE	TRUE	FALSE	FALSE	.	0	0	chr11	118401808	118402154	element_52	1	chr11	118401351	118402352
chr11	118400537	118401538	-1	ENSMUSG00000033880	ENSMUST00000127054	Lgals3bp	FALSE	FALSE	FALSE	TRUE	.	0	0	.	0	0	.	.	chr11	118400537	118401538
chr11	72266092	72267093	-1	ENSMUSG00000020805	ENSMUST00000208912	Slc13a5	FALSE	FALSE	FALSE	TRUE	.	0	0	.	0	0	.	.	chr11	72266092	72267093
chr11	72266112	72267113	-1	ENSMUSG00000020805	ENSMUST00000137701	Slc13a5	FALSE	FALSE	FALSE	TRUE	.	0	0	.	0	0	.	.	chr11	72266112	72267113
chr11	72266721	72267722	-1	ENSMUSG00000020805	ENSMUST00000207990	Slc13a5	FALSE	FALSE	FALSE	TRUE	.	0	0	.	0	0	.	.	chr11	72266721	72267722
chr11	72266092	72267093	-1	ENSMUSG00000020805	ENSMUST00000208056	Slc13a5	FALSE	FALSE	FALSE	TRUE	.	0	0	.	0	0	.	.	chr11	72266092	72267093
chr11	72266101	72267102	-1	ENSMUSG00000020805	ENSMUST00000140167	Slc13a5	FALSE	FALSE	FALSE	TRUE	.	0	0	.	0	0	.	.	chr11	72266101	72267102
chr11	72266158	72267159	-1	ENSMUSG00000020805	ENSMUST00000021161	Slc13a5	FALSE	FALSE	FALSE	TRUE	.	0	0	.	0	0	.	.	chr11	72266158	72267159
chr11	100703770	100704771	-1	ENSMUSG00000017830	ENSMUST00000017974	Dhx58	FALSE	TRUE	FALSE	FALSE	.	0	0	chr11	100704075	100704441	element_47	1	chr11	100703770	100704771
chr11	100702846	100703847	-1	ENSMUSG00000017830	ENSMUST00000150656	Dhx58	FALSE	FALSE	FALSE	TRUE	.	0	0	.	0	0	.	.	chr11	100702846	100703847
chr11	100703752	100704753	-1	ENSMUSG00000017830	ENSMUST00000126167	Dhx58	FALSE	TRUE	FALSE	FALSE	.	0	0	chr11	100704075	100704441	element_47	1	chr11	100703752	100704753
chr11	100698734	100699735	-1	ENSMUSG00000017830	ENSMUST00000149869	Dhx58	FALSE	FALSE	FALSE	TRUE	.	0	0	.	0	0	.	.	chr11	100698734	100699735
chr11	100696119	100697120	-1	ENSMUSG00000017830	ENSMUST00000140543	Dhx58	FALSE	FALSE	FALSE	TRUE	.	0	0	.	0	0	.	.	chr11	100696119	100697120
chr11	100703770	100704771	-1	ENSMUSG00000017830	ENSMUST00000132930	Dhx58	FALSE	TRUE	FALSE	FALSE	.	0	0	chr11	100704075	100704441	element_47	1	chr11	100703770	100704771
chr11	121080624	121081625	-1	ENSMUSG00000025165	ENSMUST00000149917	Sectm1a	FALSE	FALSE	FALSE	TRUE	.	0	0	.	0	0	.	.	chr11	121080624	121081625
chr11	121080719	121081720	-1	ENSMUSG00000025165	ENSMUST00000026162	Sectm1a	FALSE	FALSE	FALSE	TRUE	.	0	0	.	0	0	.	.	chr11	121080719	121081720
chr11	121080629	121081630	-1	ENSMUSG00000025165	ENSMUST00000106120	Sectm1a	FALSE	FALSE	FALSE	TRUE	.	0	0	.	0	0	.	.	chr11	121080629	121081630
chr11	121080635	121081636	-1	ENSMUSG00000025165	ENSMUST00000100126	Sectm1a	FALSE	FALSE	FALSE	TRUE	.	0	0	.	0	0	.	.	chr11	121080635	121081636
chr11	121080638	121081639	-1	ENSMUSG00000025165	ENSMUST00000106119	Sectm1a	FALSE	FALSE	FALSE	TRUE	.	0	0	.	0	0	.	.	chr11	121080638	121081639
chr11	49050741	49051742	-1	ENSMUSG00000069892	ENSMUST00000093152	9930111J21Rik2	FALSE	FALSE	FALSE	TRUE	.	0	0	.	0	0	.	.	chr11	49050741	49051742
chr11	49050621	49051622	-1	ENSMUSG00000069892	ENSMUST00000132768	9930111J21Rik2	FALSE	FALSE	FALSE	TRUE	.	0	0	.	0	0	.	.	chr11	49050621	49051622
chr11	49050724	49051725	-1	ENSMUSG00000069892	ENSMUST00000101295	9930111J21Rik2	FALSE	FALSE	FALSE	TRUE	.	0	0	.	0	0	.	.	chr11	49050724	49051725
chr11	48926678	48927679	-1	ENSMUSG00000048852	ENSMUST00000129318	Gm12185	FALSE	TRUE	FALSE	FALSE	.	0	0	chr11	48927045	48927474	element_63	2	chr11	48926678	48927679
chr11	48991725	48992726	-1	ENSMUSG00000048852	ENSMUST00000059930	Gm12185	FALSE	TRUE	FALSE	FALSE	.	0	0	chr11	48992206	48992529	element_64	2	chr11	48991725	48992726
chr11	48926658	48927659	-1	ENSMUSG00000048852	ENSMUST00000094476	Gm12185	FALSE	TRUE	FALSE	FALSE	.	0	0	chr11	48927045	48927474	element_63	2	chr11	48926658	48927659
chr11	48992389	48993390	-1	ENSMUSG00000078922	ENSMUST00000132745	Tgtp1	FALSE	TRUE	FALSE	FALSE	.	0	0	chr11	48992206	48992529	element_64	2	chr11	48992389	48993390
chr11	48993671	48994672	-1	ENSMUSG00000078922	ENSMUST00000146439	Tgtp1	FALSE	TRUE	FALSE	FALSE	.	0	0	chr11	48994056	48994486	element_65	2	chr11	48993671	48994672
chr11	48991757	48992758	-1	ENSMUSG00000078922	ENSMUST00000068063	Tgtp1	FALSE	TRUE	FALSE	FALSE	.	0	0	chr11	48992206	48992529	element_64	2	chr11	48991757	48992758
chr11	20726641	20727642	-1	ENSMUSG00000049659	ENSMUST00000177014	Aftph	FALSE	FALSE	FALSE	TRUE	.	0	0	.	0	0	.	.	chr11	20726641	20727642
chr11	20692301	20693302	-1	ENSMUSG00000049659	ENSMUST00000134841	Aftph	FALSE	FALSE	FALSE	TRUE	.	0	0	.	0	0	.	.	chr11	20692301	20693302
chr11	20725671	20726672	-1	ENSMUSG00000049659	ENSMUST00000176782	Aftph	FALSE	FALSE	FALSE	TRUE	.	0	0	.	0	0	.	.	chr11	20725671	20726672
chr11	20711749	20712750	-1	ENSMUSG00000049659	ENSMUST00000134517	Aftph	FALSE	TRUE	FALSE	FALSE	.	0	0	chr11	20712152	20712471	element_57	3	chr11	20711749	20712750
chr11	20711823	20712824	-1	ENSMUSG00000049659	ENSMUST00000176585	Aftph	FALSE	TRUE	FALSE	FALSE	.	0	0	chr11	20712152	20712471	element_57	3	chr11	20711823	20712824
chr11	20740954	20741955	-1	ENSMUSG00000049659	ENSMUST00000177543	Aftph	FALSE	FALSE	FALSE	TRUE	.	0	0	.	0	0	.	.	chr11	20740954	20741955
chr11	20727106	20728107	-1	ENSMUSG00000049659	ENSMUST00000146722	Aftph	FALSE	FALSE	FALSE	TRUE	.	0	0	.	0	0	.	.	chr11	20727106	20728107
chr11	20711729	20712730	-1	ENSMUSG00000049659	ENSMUST00000134897	Aftph	FALSE	TRUE	FALSE	FALSE	.	0	0	chr11	20712152	20712471	element_57	3	chr11	20711729	20712730
chr11	20741088	20742089	-1	ENSMUSG00000049659	ENSMUST00000035350	Aftph	FALSE	FALSE	FALSE	TRUE	.	0	0	.	0	0	.	.	chr11	20741088	20742089
chr11	3330677	3331678	-1	ENSMUSG00000053263	ENSMUST00000155332	Gm12592	FALSE	FALSE	FALSE	TRUE	.	0	0	.	0	0	.	.	chr11	3330677	3331678
chr11	48978880	48979881	-1	ENSMUSG00000069893	ENSMUST00000097494	9930111J21Rik1	FALSE	FALSE	FALSE	TRUE	.	0	0	.	0	0	.	.	chr11	48978880	48979881
chr11	48978777	48979778	-1	ENSMUSG00000069893	ENSMUST00000141200	9930111J21Rik1	FALSE	FALSE	FALSE	TRUE	.	0	0	.	0	0	.	.	chr11	48978777	48979778
chr11	48978897	48979898	-1	ENSMUSG00000069893	ENSMUST00000093153	9930111J21Rik1	FALSE	FALSE	FALSE	TRUE	.	0	0	.	0	0	.	.	chr11	48978897	48979898
chr11	48945689	48946690	-1	ENSMUSG00000078153	ENSMUST00000104958	Psme2b	FALSE	FALSE	FALSE	TRUE	.	0	0	.	0	0	.	.	chr11	48945689	48946690
chr11	49063705	49064706	-1	ENSMUSG00000078921	ENSMUST00000128411	Tgtp2	FALSE	FALSE	FALSE	TRUE	.	0	0	.	0	0	.	.	chr11	49063705	49064706
chr11	49063703	49064704	-1	ENSMUSG00000078921	ENSMUST00000046745	Tgtp2	FALSE	FALSE	FALSE	TRUE	.	0	0	.	0	0	.	.	chr11	49063703	49064704
chr11	100354882	100355883	-1	ENSMUSG00000006930	ENSMUST00000146878	Hap1	FALSE	TRUE	FALSE	FALSE	.	0	0	chr11	100355467	100355670	element_46	3	chr11	100354882	100355883
chr11	100355586	100356587	-1	ENSMUSG00000006930	ENSMUST00000103124	Hap1	FALSE	TRUE	FALSE	FALSE	.	0	0	chr11	100355467	100355670	element_46	3	chr11	100355586	100356587
chr11	100351404	100352405	-1	ENSMUSG00000006930	ENSMUST00000174635	Hap1	FALSE	FALSE	FALSE	TRUE	.	0	0	.	0	0	.	.	chr11	100351404	100352405
chr11	100355627	100356628	-1	ENSMUSG00000006930	ENSMUST00000138603	Hap1	FALSE	TRUE	FALSE	FALSE	.	0	0	chr11	100355467	100355670	element_46	3	chr11	100355627	100356628
chr11	100353539	100354540	-1	ENSMUSG00000006930	ENSMUST00000173630	Hap1	FALSE	FALSE	FALSE	TRUE	.	0	0	.	0	0	.	.	chr11	100353539	100354540
chr11	48870919	48871920	-1	ENSMUSG00000046879	ENSMUST00000097271	Irgm1	FALSE	TRUE	FALSE	FALSE	.	0	0	chr11	48871195	48871734	element_62	4	chr11	48870919	48871920
chr11	48870873	48871874	-1	ENSMUSG00000046879	ENSMUST00000049519	Irgm1	FALSE	TRUE	FALSE	FALSE	.	0	0	chr11	48871195	48871734	element_62	4	chr11	48870873	48871874
chr11	48871182	48872183	-1	ENSMUSG00000046879	ENSMUST00000147151	Irgm1	FALSE	TRUE	FALSE	FALSE	.	0	0	chr11	48871195	48871734	element_62	4	chr11	48871182	48872183
chr11	48901713	48902714	-1	ENSMUSG00000058163	ENSMUST00000109212	Gm5431	FALSE	FALSE	FALSE	TRUE	.	0	0	.	0	0	.	.	chr11	48901713	48902714
chr11	48901651	48902652	-1	ENSMUSG00000058163	ENSMUST00000109210	Gm5431	FALSE	FALSE	FALSE	TRUE	.	0	0	.	0	0	.	.	chr11	48901651	48902652
chr11	48894211	48895212	-1	ENSMUSG00000058163	ENSMUST00000109209	Gm5431	FALSE	FALSE	FALSE	TRUE	.	0	0	.	0	0	.	.	chr11	48894211	48895212
chr11	69828058	69829059	-1	ENSMUSG00000051790	ENSMUST00000140477	Nlgn2	FALSE	FALSE	FALSE	TRUE	.	0	0	.	0	0	.	.	chr11	69828058	69829059
chr11	69834348	69835349	-1	ENSMUSG00000051790	ENSMUST00000056484	Nlgn2	FALSE	FALSE	FALSE	TRUE	.	0	0	.	0	0	.	.	chr11	69834348	69835349
chr11	69833758	69834759	-1	ENSMUSG00000051790	ENSMUST00000139893	Nlgn2	FALSE	FALSE	FALSE	TRUE	.	0	0	.	0	0	.	.	chr11	69833758	69834759
chr11	69837283	69838284	-1	ENSMUSG00000051790	ENSMUST00000108634	Nlgn2	FALSE	FALSE	FALSE	TRUE	.	0	0	.	0	0	.	.	chr11	69837283	69838284
chr12	32821372	32822373	1	ENSMUSG00000096954	ENSMUST00000180613	Gdap10	FALSE	FALSE	FALSE	TRUE	.	0	0	.	0	0	.	.	chr12	32821372	32822373
chr12	85473390	85474391	1	ENSMUSG00000021250	ENSMUST00000021674	Fos	FALSE	FALSE	FALSE	TRUE	.	0	0	.	0	0	.	.	chr12	85473390	85474391
chr12	85474411	85475412	1	ENSMUSG00000021250	ENSMUST00000134311	Fos	FALSE	FALSE	FALSE	TRUE	.	0	0	.	0	0	.	.	chr12	85474411	85475412
chr12	85474191	85475192	1	ENSMUSG00000021250	ENSMUST00000136122	Fos	FALSE	FALSE	FALSE	TRUE	.	0	0	.	0	0	.	.	chr12	85474191	85475192
chr12	85474191	85475192	1	ENSMUSG00000021250	ENSMUST00000140525	Fos	FALSE	FALSE	FALSE	TRUE	.	0	0	.	0	0	.	.	chr12	85474191	85475192
chr12	32819835	32820836	1	ENSMUSG00000020572	ENSMUST00000020886	Nampt	FALSE	FALSE	FALSE	TRUE	.	0	0	.	0	0	.	.	chr12	32819835	32820836
chr12	32819045	32820046	1	ENSMUSG00000020572	ENSMUST00000220200	Nampt	FALSE	FALSE	FALSE	TRUE	.	0	0	.	0	0	.	.	chr12	32819045	32820046
chr12	32820301	32821302	1	ENSMUSG00000020572	ENSMUST00000218491	Nampt	FALSE	TRUE	FALSE	FALSE	.	0	0	chr12	32820864	32821372	element_96	4	chr12	32820301	32821302
chr12	26468704	26469705	1	ENSMUSG00000020638	ENSMUST00000020969	Cmpk2	FALSE	TRUE	FALSE	FALSE	.	0	0	chr12	26469039	26469551	element_95	1	chr12	26468704	26469705
chr12	26470009	26471010	1	ENSMUSG00000020638	ENSMUST00000221826	Cmpk2	FALSE	FALSE	FALSE	TRUE	.	0	0	.	0	0	.	.	chr12	26470009	26471010
chr12	26473430	26474431	1	ENSMUSG00000020638	ENSMUST00000221060	Cmpk2	FALSE	FALSE	FALSE	TRUE	.	0	0	.	0	0	.	.	chr12	26473430	26474431
chr12	26470245	26471246	1	ENSMUSG00000020638	ENSMUST00000220466	Cmpk2	FALSE	FALSE	FALSE	TRUE	.	0	0	.	0	0	.	.	chr12	26470245	26471246
chr12	84772413	84773414	-1	ENSMUSG00000021242	ENSMUST00000221056	Npc2	FALSE	FALSE	FALSE	TRUE	.	0	0	.	0	0	.	.	chr12	84772413	84773414
chr12	84762039	84763040	-1	ENSMUSG00000021242	ENSMUST00000223200	Npc2	FALSE	TRUE	FALSE	FALSE	.	0	0	chr12	84762379	84762807	element_100	2	chr12	84762039	84763040
chr12	84772651	84773652	-1	ENSMUSG00000021242	ENSMUST00000021668	Npc2	FALSE	FALSE	FALSE	TRUE	.	0	0	.	0	0	.	.	chr12	84772651	84773652
chr12	84970399	84971400	-1	ENSMUSG00000042350	ENSMUST00000043169	Arel1	FALSE	FALSE	FALSE	TRUE	.	0	0	.	0	0	.	.	chr12	84970399	84971400
chr12	84944897	84945898	-1	ENSMUSG00000042350	ENSMUST00000165093	Arel1	FALSE	FALSE	FALSE	TRUE	.	0	0	.	0	0	.	.	chr12	84944897	84945898
chr12	84970323	84971324	-1	ENSMUSG00000042350	ENSMUST00000163231	Arel1	FALSE	FALSE	FALSE	TRUE	.	0	0	.	0	0	.	.	chr12	84970323	84971324
chr12	84965529	84966530	-1	ENSMUSG00000042350	ENSMUST00000168713	Arel1	FALSE	FALSE	FALSE	TRUE	.	0	0	.	0	0	.	.	chr12	84965529	84966530
chr12	84970355	84971356	-1	ENSMUSG00000042350	ENSMUST00000167448	Arel1	FALSE	FALSE	FALSE	TRUE	.	0	0	.	0	0	.	.	chr12	84970355	84971356
chr12	84946422	84947423	-1	ENSMUSG00000042350	ENSMUST00000169161	Arel1	FALSE	FALSE	FALSE	TRUE	.	0	0	.	0	0	.	.	chr12	84946422	84947423
chr12	84970337	84971338	-1	ENSMUSG00000042350	ENSMUST00000165886	Arel1	FALSE	FALSE	FALSE	TRUE	.	0	0	.	0	0	.	.	chr12	84970337	84971338
chr12	84942877	84943878	-1	ENSMUSG00000042350	ENSMUST00000163372	Arel1	FALSE	FALSE	FALSE	TRUE	.	0	0	.	0	0	.	.	chr12	84942877	84943878
chr12	103443179	103444180	-1	ENSMUSG00000079017	ENSMUST00000055071	Ifi27l2a	FALSE	FALSE	FALSE	TRUE	.	0	0	.	0	0	.	.	chr12	103443179	103444180
chr12	103410411	103411412	-1	ENSMUSG00000041645	ENSMUST00000222715	Ddx24	FALSE	FALSE	FALSE	TRUE	.	0	0	.	0	0	.	.	chr12	103410411	103411412
chr12	103425279	103426280	-1	ENSMUSG00000041645	ENSMUST00000110001	Ddx24	FALSE	FALSE	FALSE	TRUE	.	0	0	.	0	0	.	.	chr12	103425279	103426280
chr12	103425283	103426284	-1	ENSMUSG00000041645	ENSMUST00000223233	Ddx24	FALSE	FALSE	FALSE	TRUE	.	0	0	.	0	0	.	.	chr12	103425283	103426284
chr12	103425281	103426282	-1	ENSMUSG00000041645	ENSMUST00000220975	Ddx24	FALSE	FALSE	FALSE	TRUE	.	0	0	.	0	0	.	.	chr12	103425281	103426282
chr12	103410932	103411933	-1	ENSMUSG00000041645	ENSMUST00000220481	Ddx24	FALSE	FALSE	FALSE	TRUE	.	0	0	.	0	0	.	.	chr12	103410932	103411933
chr12	103425329	103426330	-1	ENSMUSG00000041645	ENSMUST00000220705	Ddx24	FALSE	FALSE	FALSE	TRUE	.	0	0	.	0	0	.	.	chr12	103425329	103426330
chr12	103425318	103426319	-1	ENSMUSG00000041645	ENSMUST00000044923	Ddx24	FALSE	FALSE	FALSE	TRUE	.	0	0	.	0	0	.	.	chr12	103425318	103426319
chr12	103425323	103426324	-1	ENSMUSG00000041645	ENSMUST00000221211	Ddx24	FALSE	FALSE	FALSE	TRUE	.	0	0	.	0	0	.	.	chr12	103425323	103426324
chr12	103416834	103417835	-1	ENSMUSG00000041645	ENSMUST00000222782	Ddx24	FALSE	FALSE	FALSE	TRUE	.	0	0	.	0	0	.	.	chr12	103416834	103417835
chr12	87387854	87388855	-1	ENSMUSG00000021036	ENSMUST00000021424	Sptlc2	FALSE	FALSE	FALSE	TRUE	.	0	0	.	0	0	.	.	chr12	87387854	87388855
chr12	87387740	87388741	-1	ENSMUSG00000021036	ENSMUST00000167911	Sptlc2	FALSE	FALSE	FALSE	TRUE	.	0	0	.	0	0	.	.	chr12	87387740	87388741
chr12	87328112	87329113	-1	ENSMUSG00000021036	ENSMUST00000170720	Sptlc2	FALSE	FALSE	FALSE	TRUE	.	0	0	.	0	0	.	.	chr12	87328112	87329113
chr12	87343347	87344348	-1	ENSMUSG00000021036	ENSMUST00000169845	Sptlc2	FALSE	FALSE	FALSE	TRUE	.	0	0	.	0	0	.	.	chr12	87343347	87344348
chr12	87349880	87350881	-1	ENSMUSG00000021036	ENSMUST00000170110	Sptlc2	FALSE	FALSE	FALSE	TRUE	.	0	0	.	0	0	.	.	chr12	87349880	87350881
chr12	79006839	79007840	-1	ENSMUSG00000046157	ENSMUST00000174721	Tmem229b	FALSE	FALSE	FALSE	TRUE	.	0	0	.	0	0	.	.	chr12	79006839	79007840
chr12	78980277	78981278	-1	ENSMUSG00000046157	ENSMUST00000174344	Tmem229b	FALSE	FALSE	FALSE	TRUE	.	0	0	.	0	0	.	.	chr12	78980277	78981278
chr12	79007126	79008127	-1	ENSMUSG00000046157	ENSMUST00000174697	Tmem229b	FALSE	FALSE	FALSE	TRUE	.	0	0	.	0	0	.	.	chr12	79007126	79008127
chr12	78980262	78981263	-1	ENSMUSG00000046157	ENSMUST00000174072	Tmem229b	FALSE	FALSE	FALSE	TRUE	.	0	0	.	0	0	.	.	chr12	78980262	78981263
chr12	78982977	78983978	-1	ENSMUSG00000046157	ENSMUST00000070174	Tmem229b	FALSE	FALSE	FALSE	TRUE	.	0	0	.	0	0	.	.	chr12	78982977	78983978
chr12	79006776	79007777	-1	ENSMUSG00000046157	ENSMUST00000056660	Tmem229b	FALSE	FALSE	FALSE	TRUE	.	0	0	.	0	0	.	.	chr12	79006776	79007777
chr12	79006162	79007163	-1	ENSMUSG00000046157	ENSMUST00000173095	Tmem229b	FALSE	FALSE	FALSE	TRUE	.	0	0	.	0	0	.	.	chr12	79006162	79007163
chr12	54943551	54944552	-1	ENSMUSG00000035021	ENSMUST00000173176	Baz1a	FALSE	FALSE	FALSE	TRUE	.	0	0	.	0	0	.	.	chr12	54943551	54944552
chr12	54985435	54986436	-1	ENSMUSG00000035021	ENSMUST00000173177	Baz1a	FALSE	FALSE	FALSE	TRUE	.	0	0	.	0	0	.	.	chr12	54985435	54986436
chr12	54929838	54930839	-1	ENSMUSG00000035021	ENSMUST00000174225	Baz1a	FALSE	FALSE	FALSE	TRUE	.	0	0	.	0	0	.	.	chr12	54929838	54930839
chr12	54986006	54987007	-1	ENSMUSG00000035021	ENSMUST00000173433	Baz1a	FALSE	FALSE	FALSE	TRUE	.	0	0	.	0	0	.	.	chr12	54986006	54987007
chr12	54894653	54895654	-1	ENSMUSG00000035021	ENSMUST00000173453	Baz1a	FALSE	FALSE	FALSE	TRUE	.	0	0	.	0	0	.	.	chr12	54894653	54895654
chr12	55013847	55014848	-1	ENSMUSG00000035021	ENSMUST00000172875	Baz1a	FALSE	FALSE	FALSE	TRUE	.	0	0	.	0	0	.	.	chr12	55013847	55014848
chr12	54998601	54999602	-1	ENSMUSG00000035021	ENSMUST00000173529	Baz1a	FALSE	FALSE	FALSE	TRUE	.	0	0	.	0	0	.	.	chr12	54998601	54999602
chr12	54985835	54986836	-1	ENSMUSG00000035021	ENSMUST00000038926	Baz1a	FALSE	FALSE	FALSE	TRUE	.	0	0	.	0	0	.	.	chr12	54985835	54986836
chr12	91785935	91786936	-1	ENSMUSG00000020961	ENSMUST00000052969	Ston2	FALSE	FALSE	FALSE	TRUE	.	0	0	.	0	0	.	.	chr12	91785935	91786936
chr12	91743354	91744355	-1	ENSMUSG00000020961	ENSMUST00000164713	Ston2	FALSE	FALSE	FALSE	TRUE	.	0	0	.	0	0	.	.	chr12	91743354	91744355
chr12	91713473	91714474	-1	ENSMUSG00000020961	ENSMUST00000111609	Ston2	FALSE	FALSE	FALSE	TRUE	.	0	0	.	0	0	.	.	chr12	91713473	91714474
chr12	91745583	91746584	-1	ENSMUSG00000020961	ENSMUST00000166967	Ston2	FALSE	FALSE	FALSE	TRUE	.	0	0	.	0	0	.	.	chr12	91745583	91746584
chr12	91770669	91771670	-1	ENSMUSG00000020961	ENSMUST00000170984	Ston2	FALSE	FALSE	FALSE	TRUE	.	0	0	.	0	0	.	.	chr12	91770669	91771670
chr12	91787886	91788887	-1	ENSMUSG00000020961	ENSMUST00000166008	Ston2	FALSE	FALSE	FALSE	TRUE	.	0	0	.	0	0	.	.	chr12	91787886	91788887
chr12	91778636	91779637	-1	ENSMUSG00000020961	ENSMUST00000170077	Ston2	FALSE	FALSE	FALSE	TRUE	.	0	0	.	0	0	.	.	chr12	91778636	91779637
chr12	26455951	26456952	-1	ENSMUSG00000020641	ENSMUST00000020970	Rsad2	FALSE	FALSE	FALSE	TRUE	.	0	0	.	0	0	.	.	chr12	26455951	26456952
chr12	26455930	26456931	-1	ENSMUSG00000020641	ENSMUST00000137792	Rsad2	FALSE	FALSE	FALSE	TRUE	.	0	0	.	0	0	.	.	chr12	26455930	26456931
chr12	26454341	26455342	-1	ENSMUSG00000020641	ENSMUST00000142732	Rsad2	FALSE	FALSE	FALSE	TRUE	.	0	0	.	0	0	.	.	chr12	26454341	26455342
chr13	4059091	4060092	1	ENSMUSG00000033715	ENSMUST00000041768	Akr1c14	FALSE	FALSE	FALSE	TRUE	.	0	0	.	0	0	.	.	chr13	4059091	4060092
chr13	4077754	4078755	1	ENSMUSG00000033715	ENSMUST00000147180	Akr1c14	FALSE	FALSE	FALSE	TRUE	.	0	0	.	0	0	.	.	chr13	4077754	4078755
chr13	4048511	4049512	1	ENSMUSG00000033715	ENSMUST00000118717	Akr1c14	FALSE	FALSE	FALSE	TRUE	.	0	0	.	0	0	.	.	chr13	4048511	4049512
chr13	3633532	3634533	1	ENSMUSG00000033781	ENSMUST00000042288	Asb13	FALSE	FALSE	FALSE	TRUE	.	0	0	.	0	0	.	.	chr13	3633532	3634533
chr13	3633598	3634599	1	ENSMUSG00000033781	ENSMUST00000141147	Asb13	FALSE	FALSE	FALSE	TRUE	.	0	0	.	0	0	.	.	chr13	3633598	3634599
chr13	3633599	3634600	1	ENSMUSG00000033781	ENSMUST00000141967	Asb13	FALSE	FALSE	FALSE	TRUE	.	0	0	.	0	0	.	.	chr13	3633599	3634600
chr13	3633589	3634590	1	ENSMUSG00000033781	ENSMUST00000156595	Asb13	FALSE	FALSE	FALSE	TRUE	.	0	0	.	0	0	.	.	chr13	3633589	3634590
chr13	58157149	58158150	1	ENSMUSG00000050002	ENSMUST00000051490	Idnk	FALSE	FALSE	FALSE	TRUE	.	0	0	.	0	0	.	.	chr13	58157149	58158150
chr13	58157183	58158184	1	ENSMUSG00000050002	ENSMUST00000225236	Idnk	FALSE	FALSE	FALSE	TRUE	.	0	0	.	0	0	.	.	chr13	58157183	58158184
chr13	58157154	58158155	1	ENSMUSG00000050002	ENSMUST00000109868	Idnk	FALSE	FALSE	FALSE	TRUE	.	0	0	.	0	0	.	.	chr13	58157154	58158155
chr13	58157149	58158150	1	ENSMUSG00000050002	ENSMUST00000226010	Idnk	FALSE	FALSE	FALSE	TRUE	.	0	0	.	0	0	.	.	chr13	58157149	58158150
chr13	33004041	33005042	1	ENSMUSG00000045827	ENSMUST00000006391	Serpinb9	FALSE	FALSE	FALSE	TRUE	.	0	0	.	0	0	.	.	chr13	33004041	33005042
chr13	33002750	33003751	1	ENSMUSG00000045827	ENSMUST00000063191	Serpinb9	FALSE	FALSE	FALSE	TRUE	.	0	0	.	0	0	.	.	chr13	33002750	33003751
chr13	32964944	32965945	1	ENSMUSG00000042842	ENSMUST00000017184	Serpinb6b	FALSE	FALSE	FALSE	TRUE	.	0	0	.	0	0	.	.	chr13	32964944	32965945
chr13	32964709	32965710	1	ENSMUSG00000042842	ENSMUST00000110293	Serpinb6b	FALSE	FALSE	FALSE	TRUE	.	0	0	.	0	0	.	.	chr13	32964709	32965710
chr13	32965003	32966004	1	ENSMUSG00000042842	ENSMUST00000164541	Serpinb6b	FALSE	FALSE	FALSE	TRUE	.	0	0	.	0	0	.	.	chr13	32965003	32966004
chr13	32970998	32971999	1	ENSMUSG00000042842	ENSMUST00000222967	Serpinb6b	FALSE	FALSE	FALSE	TRUE	.	0	0	.	0	0	.	.	chr13	32970998	32971999
chr13	74639355	74640356	1	ENSMUSG00000021583	ENSMUST00000221822	Erap1	FALSE	FALSE	FALSE	TRUE	.	0	0	.	0	0	.	.	chr13	74639355	74640356
chr13	74639353	74640354	1	ENSMUSG00000021583	ENSMUST00000220594	Erap1	FALSE	FALSE	FALSE	TRUE	.	0	0	.	0	0	.	.	chr13	74639353	74640354
chr13	74665599	74666600	1	ENSMUSG00000021583	ENSMUST00000222127	Erap1	FALSE	FALSE	FALSE	TRUE	.	0	0	.	0	0	.	.	chr13	74665599	74666600
chr13	74639373	74640374	1	ENSMUSG00000021583	ENSMUST00000221526	Erap1	FALSE	FALSE	FALSE	TRUE	.	0	0	.	0	0	.	.	chr13	74639373	74640374
chr13	74662967	74663968	1	ENSMUSG00000021583	ENSMUST00000221606	Erap1	FALSE	FALSE	FALSE	TRUE	.	0	0	.	0	0	.	.	chr13	74662967	74663968
chr13	74639068	74640069	1	ENSMUSG00000021583	ENSMUST00000169114	Erap1	FALSE	FALSE	FALSE	TRUE	.	0	0	.	0	0	.	.	chr13	74639068	74640069
chr13	50417364	50418365	1	ENSMUSG00000037816	ENSMUST00000046974	Fbxw17	FALSE	FALSE	FALSE	TRUE	.	0	0	.	0	0	.	.	chr13	50417364	50418365
chr13	50430857	50431858	1	ENSMUSG00000037816	ENSMUST00000177233	Fbxw17	FALSE	FALSE	FALSE	TRUE	.	0	0	.	0	0	.	.	chr13	50430857	50431858
chr13	50417386	50418387	1	ENSMUSG00000037816	ENSMUST00000176479	Fbxw17	FALSE	FALSE	FALSE	TRUE	.	0	0	.	0	0	.	.	chr13	50417386	50418387
chr13	50417381	50418382	1	ENSMUSG00000037816	ENSMUST00000176913	Fbxw17	FALSE	FALSE	FALSE	TRUE	.	0	0	.	0	0	.	.	chr13	50417381	50418382
chr13	50417395	50418396	1	ENSMUSG00000037816	ENSMUST00000177245	Fbxw17	FALSE	FALSE	FALSE	TRUE	.	0	0	.	0	0	.	.	chr13	50417395	50418396
chr13	50431176	50432177	1	ENSMUSG00000037816	ENSMUST00000176298	Fbxw17	FALSE	FALSE	FALSE	TRUE	.	0	0	.	0	0	.	.	chr13	50431176	50432177
chr13	50431685	50432686	1	ENSMUSG00000037816	ENSMUST00000176543	Fbxw17	FALSE	FALSE	FALSE	TRUE	.	0	0	.	0	0	.	.	chr13	50431685	50432686
chr13	50430671	50431672	1	ENSMUSG00000037816	ENSMUST00000176470	Fbxw17	FALSE	FALSE	FALSE	TRUE	.	0	0	.	0	0	.	.	chr13	50430671	50431672
chr13	50431211	50432212	1	ENSMUSG00000037816	ENSMUST00000176772	Fbxw17	FALSE	FALSE	FALSE	TRUE	.	0	0	.	0	0	.	.	chr13	50431211	50432212
chr13	50417386	50418387	1	ENSMUSG00000037816	ENSMUST00000176424	Fbxw17	FALSE	FALSE	FALSE	TRUE	.	0	0	.	0	0	.	.	chr13	50417386	50418387
chr13	50423355	50424356	1	ENSMUSG00000037816	ENSMUST00000176976	Fbxw17	FALSE	FALSE	FALSE	TRUE	.	0	0	.	0	0	.	.	chr13	50423355	50424356
chr13	50429470	50430471	1	ENSMUSG00000037816	ENSMUST00000176508	Fbxw17	FALSE	FALSE	FALSE	TRUE	.	0	0	.	0	0	.	.	chr13	50429470	50430471
chr13	50430621	50431622	1	ENSMUSG00000037816	ENSMUST00000177541	Fbxw17	FALSE	FALSE	FALSE	TRUE	.	0	0	.	0	0	.	.	chr13	50430621	50431622
chr13	43134884	43135885	1	ENSMUSG00000054728	ENSMUST00000161201	Phactr1	FALSE	FALSE	FALSE	TRUE	.	0	0	.	0	0	.	.	chr13	43134884	43135885
chr13	43125388	43126389	1	ENSMUSG00000054728	ENSMUST00000140651	Phactr1	FALSE	FALSE	FALSE	TRUE	.	0	0	.	0	0	.	.	chr13	43125388	43126389
chr13	43132497	43133498	1	ENSMUSG00000054728	ENSMUST00000136951	Phactr1	FALSE	FALSE	FALSE	TRUE	.	0	0	.	0	0	.	.	chr13	43132497	43133498
chr13	42680123	42681124	1	ENSMUSG00000054728	ENSMUST00000128646	Phactr1	FALSE	FALSE	FALSE	TRUE	.	0	0	.	0	0	.	.	chr13	42680123	42681124
chr13	43122357	43123358	1	ENSMUSG00000054728	ENSMUST00000136576	Phactr1	FALSE	FALSE	FALSE	TRUE	.	0	0	.	0	0	.	.	chr13	43122357	43123358
chr13	42682198	42683199	1	ENSMUSG00000054728	ENSMUST00000110161	Phactr1	FALSE	FALSE	FALSE	TRUE	.	0	0	.	0	0	.	.	chr13	42682198	42683199
chr13	43122372	43123373	1	ENSMUSG00000054728	ENSMUST00000138640	Phactr1	FALSE	FALSE	FALSE	TRUE	.	0	0	.	0	0	.	.	chr13	43122372	43123373
chr13	42709043	42710044	1	ENSMUSG00000054728	ENSMUST00000066928	Phactr1	FALSE	FALSE	FALSE	TRUE	.	0	0	.	0	0	.	.	chr13	42709043	42710044
chr13	42865747	42866748	1	ENSMUSG00000054728	ENSMUST00000131942	Phactr1	FALSE	FALSE	FALSE	TRUE	.	0	0	.	0	0	.	.	chr13	42865747	42866748
chr13	43125388	43126389	1	ENSMUSG00000054728	ENSMUST00000150620	Phactr1	FALSE	FALSE	FALSE	TRUE	.	0	0	.	0	0	.	.	chr13	43125388	43126389
chr13	42709081	42710082	1	ENSMUSG00000054728	ENSMUST00000148891	Phactr1	FALSE	FALSE	FALSE	TRUE	.	0	0	.	0	0	.	.	chr13	42709081	42710082
chr13	43111633	43112634	1	ENSMUSG00000054728	ENSMUST00000137434	Phactr1	FALSE	FALSE	FALSE	TRUE	.	0	0	.	0	0	.	.	chr13	43111633	43112634
chr13	42866334	42867335	1	ENSMUSG00000054728	ENSMUST00000127859	Phactr1	FALSE	FALSE	FALSE	TRUE	.	0	0	.	0	0	.	.	chr13	42866334	42867335
chr13	42680299	42681300	1	ENSMUSG00000054728	ENSMUST00000132050	Phactr1	FALSE	FALSE	FALSE	TRUE	.	0	0	.	0	0	.	.	chr13	42680299	42681300
chr13	43125420	43126421	1	ENSMUSG00000054728	ENSMUST00000123987	Phactr1	FALSE	FALSE	FALSE	TRUE	.	0	0	.	0	0	.	.	chr13	43125420	43126421
chr13	42681013	42682014	1	ENSMUSG00000054728	ENSMUST00000149235	Phactr1	FALSE	FALSE	FALSE	TRUE	.	0	0	.	0	0	.	.	chr13	42681013	42682014
chr13	73700279	73701280	-1	ENSMUSG00000021565	ENSMUST00000022048	Slc6a19	FALSE	FALSE	FALSE	TRUE	.	0	0	.	0	0	.	.	chr13	73700279	73701280
chr13	73700194	73701195	-1	ENSMUSG00000021565	ENSMUST00000132085	Slc6a19	FALSE	FALSE	FALSE	TRUE	.	0	0	.	0	0	.	.	chr13	73700194	73701195
chr13	73691878	73692879	-1	ENSMUSG00000021565	ENSMUST00000139087	Slc6a19	FALSE	FALSE	FALSE	TRUE	.	0	0	.	0	0	.	.	chr13	73691878	73692879
chr13	73704364	73705365	-1	ENSMUSG00000021565	ENSMUST00000123997	Slc6a19	FALSE	FALSE	FALSE	TRUE	.	0	0	.	0	0	.	.	chr13	73704364	73705365
chr13	73691753	73692754	-1	ENSMUSG00000021565	ENSMUST00000140878	Slc6a19	FALSE	FALSE	FALSE	TRUE	.	0	0	.	0	0	.	.	chr13	73691753	73692754
chr13	73700180	73701181	-1	ENSMUSG00000021565	ENSMUST00000124406	Slc6a19	FALSE	FALSE	FALSE	TRUE	.	0	0	.	0	0	.	.	chr13	73700180	73701181
chr13	73692135	73693136	-1	ENSMUSG00000021565	ENSMUST00000120322	Slc6a19	FALSE	FALSE	FALSE	TRUE	.	0	0	.	0	0	.	.	chr13	73692135	73693136
chr13	69534116	69535117	-1	ENSMUSG00000034575	ENSMUST00000198607	Papd7	FALSE	TRUE	FALSE	FALSE	.	0	0	chr13	69534762	69535081	element_113	4	chr13	69534116	69535117
chr13	69533685	69534686	-1	ENSMUSG00000034575	ENSMUST00000222497	Papd7	FALSE	FALSE	FALSE	TRUE	.	0	0	.	0	0	.	.	chr13	69533685	69534686
chr13	69533363	69534364	-1	ENSMUSG00000034575	ENSMUST00000044081	Papd7	FALSE	FALSE	FALSE	TRUE	.	0	0	.	0	0	.	.	chr13	69533363	69534364
chr13	69531931	69532932	-1	ENSMUSG00000034575	ENSMUST00000223344	Papd7	FALSE	FALSE	FALSE	TRUE	.	0	0	.	0	0	.	.	chr13	69531931	69532932
chr13	59822646	59823647	-1	ENSMUSG00000035248	ENSMUST00000071703	Zcchc6	FALSE	FALSE	FALSE	TRUE	.	0	0	.	0	0	.	.	chr13	59822646	59823647
chr13	59822613	59823614	-1	ENSMUSG00000035248	ENSMUST00000225179	Zcchc6	FALSE	FALSE	FALSE	TRUE	.	0	0	.	0	0	.	.	chr13	59822613	59823614
chr13	59822087	59823088	-1	ENSMUSG00000035248	ENSMUST00000225987	Zcchc6	FALSE	FALSE	FALSE	TRUE	.	0	0	.	0	0	.	.	chr13	59822087	59823088
chr13	59808977	59809978	-1	ENSMUSG00000035248	ENSMUST00000225241	Zcchc6	FALSE	FALSE	FALSE	TRUE	.	0	0	.	0	0	.	.	chr13	59808977	59809978
chr13	59780119	59781120	-1	ENSMUSG00000035248	ENSMUST00000224845	Zcchc6	FALSE	FALSE	FALSE	TRUE	.	0	0	.	0	0	.	.	chr13	59780119	59781120
chr13	59784873	59785874	-1	ENSMUSG00000035248	ENSMUST00000224320	Zcchc6	FALSE	FALSE	FALSE	TRUE	.	0	0	.	0	0	.	.	chr13	59784873	59785874
chr13	59796629	59797630	-1	ENSMUSG00000035248	ENSMUST00000225944	Zcchc6	FALSE	FALSE	FALSE	TRUE	.	0	0	.	0	0	.	.	chr13	59796629	59797630
chr13	59784339	59785340	-1	ENSMUSG00000035248	ENSMUST00000225607	Zcchc6	FALSE	FALSE	FALSE	TRUE	.	0	0	.	0	0	.	.	chr13	59784339	59785340
chr13	59822632	59823633	-1	ENSMUSG00000035248	ENSMUST00000225576	Zcchc6	FALSE	FALSE	FALSE	TRUE	.	0	0	.	0	0	.	.	chr13	59822632	59823633
chr13	59809005	59810006	-1	ENSMUSG00000035248	ENSMUST00000224480	Zcchc6	FALSE	FALSE	FALSE	TRUE	.	0	0	.	0	0	.	.	chr13	59809005	59810006
chr13	12461002	12462003	-1	ENSMUSG00000057554	ENSMUST00000099820	Lgals8	FALSE	FALSE	FALSE	TRUE	.	0	0	.	0	0	.	.	chr13	12461002	12462003
chr13	12448235	12449236	-1	ENSMUSG00000057554	ENSMUST00000133143	Lgals8	FALSE	FALSE	FALSE	TRUE	.	0	0	.	0	0	.	.	chr13	12448235	12449236
chr13	12464443	12465444	-1	ENSMUSG00000057554	ENSMUST00000124888	Lgals8	FALSE	FALSE	FALSE	TRUE	.	0	0	.	0	0	.	.	chr13	12464443	12465444
chr13	12456022	12457023	-1	ENSMUSG00000057554	ENSMUST00000155871	Lgals8	FALSE	FALSE	FALSE	TRUE	.	0	0	.	0	0	.	.	chr13	12456022	12457023
chr13	12460546	12461547	-1	ENSMUSG00000057554	ENSMUST00000152478	Lgals8	FALSE	FALSE	FALSE	TRUE	.	0	0	.	0	0	.	.	chr13	12460546	12461547
chr13	12461005	12462006	-1	ENSMUSG00000057554	ENSMUST00000135166	Lgals8	FALSE	FALSE	FALSE	TRUE	.	0	0	.	0	0	.	.	chr13	12461005	12462006
chr13	12461237	12462238	-1	ENSMUSG00000057554	ENSMUST00000099821	Lgals8	FALSE	FALSE	FALSE	TRUE	.	0	0	.	0	0	.	.	chr13	12461237	12462238
chr13	12460992	12461993	-1	ENSMUSG00000057554	ENSMUST00000143693	Lgals8	FALSE	FALSE	FALSE	TRUE	.	0	0	.	0	0	.	.	chr13	12460992	12461993
chr13	12454513	12455514	-1	ENSMUSG00000057554	ENSMUST00000135060	Lgals8	FALSE	FALSE	FALSE	TRUE	.	0	0	.	0	0	.	.	chr13	12454513	12455514
chr13	12460994	12461995	-1	ENSMUSG00000057554	ENSMUST00000144283	Lgals8	FALSE	FALSE	FALSE	TRUE	.	0	0	.	0	0	.	.	chr13	12460994	12461995
chr13	23710213	23711214	-1	ENSMUSG00000006611	ENSMUST00000006787	Hfe	FALSE	FALSE	FALSE	TRUE	.	0	0	.	0	0	.	.	chr13	23710213	23711214
chr13	23710213	23711214	-1	ENSMUSG00000006611	ENSMUST00000091707	Hfe	FALSE	FALSE	FALSE	TRUE	.	0	0	.	0	0	.	.	chr13	23710213	23711214
chr13	23705187	23706188	-1	ENSMUSG00000006611	ENSMUST00000151243	Hfe	FALSE	FALSE	FALSE	TRUE	.	0	0	.	0	0	.	.	chr13	23705187	23706188
chr13	23710353	23711354	-1	ENSMUSG00000006611	ENSMUST00000091706	Hfe	FALSE	FALSE	FALSE	TRUE	.	0	0	.	0	0	.	.	chr13	23710353	23711354
chr14	84448007	84449008	1	ENSMUSG00000035566	ENSMUST00000226362	Pcdh17	FALSE	FALSE	FALSE	TRUE	.	0	0	.	0	0	.	.	chr14	84448007	84449008
chr14	84443063	84444064	1	ENSMUSG00000035566	ENSMUST00000071370	Pcdh17	FALSE	FALSE	FALSE	TRUE	.	0	0	.	0	0	.	.	chr14	84443063	84444064
chr14	74640340	74641341	1	ENSMUSG00000034997	ENSMUST00000036653	Htr2a	FALSE	FALSE	FALSE	TRUE	.	0	0	.	0	0	.	.	chr14	74640340	74641341
chr14	79515174	79516175	1	ENSMUSG00000036461	ENSMUST00000110835	Elf1	FALSE	FALSE	FALSE	TRUE	.	0	0	.	0	0	.	.	chr14	79515174	79516175
chr14	79515186	79516187	1	ENSMUSG00000036461	ENSMUST00000227192	Elf1	FALSE	FALSE	FALSE	TRUE	.	0	0	.	0	0	.	.	chr14	79515186	79516187
chr14	79515198	79516199	1	ENSMUSG00000036461	ENSMUST00000227104	Elf1	FALSE	FALSE	FALSE	TRUE	.	0	0	.	0	0	.	.	chr14	79515198	79516199
chr14	79480694	79481695	1	ENSMUSG00000036461	ENSMUST00000040131	Elf1	FALSE	FALSE	FALSE	TRUE	.	0	0	.	0	0	.	.	chr14	79480694	79481695
chr14	77903907	77904908	1	ENSMUSG00000022014	ENSMUST00000169978	Epsti1	FALSE	FALSE	FALSE	TRUE	.	0	0	.	0	0	.	.	chr14	77903907	77904908
chr14	77903907	77904908	1	ENSMUSG00000022014	ENSMUST00000227903	Epsti1	FALSE	FALSE	FALSE	TRUE	.	0	0	.	0	0	.	.	chr14	77903907	77904908
chr14	77903739	77904740	1	ENSMUSG00000022014	ENSMUST00000022591	Epsti1	FALSE	FALSE	FALSE	TRUE	.	0	0	.	0	0	.	.	chr14	77903739	77904740
chr14	50955744	50956745	1	ENSMUSG00000068417	ENSMUST00000228593	Pnp2	FALSE	FALSE	FALSE	TRUE	.	0	0	.	0	0	.	.	chr14	50955744	50956745
chr14	50955492	50956493	1	ENSMUSG00000068417	ENSMUST00000095925	Pnp2	FALSE	FALSE	FALSE	TRUE	.	0	0	.	0	0	.	.	chr14	50955492	50956493
chr14	50944006	50945007	1	ENSMUSG00000115338	ENSMUST00000178092	Pnp	FALSE	FALSE	FALSE	TRUE	.	0	0	.	0	0	.	.	chr14	50944006	50945007
chr14	50944023	50945024	1	ENSMUSG00000115338	ENSMUST00000228712	Pnp	FALSE	FALSE	FALSE	TRUE	.	0	0	.	0	0	.	.	chr14	50944023	50945024
chr14	50943802	50944803	1	ENSMUSG00000115338	ENSMUST00000048615	Pnp	FALSE	FALSE	FALSE	TRUE	.	0	0	.	0	0	.	.	chr14	50943802	50944803
chr14	50944061	50945062	1	ENSMUSG00000115338	ENSMUST00000228631	Pnp	FALSE	FALSE	FALSE	TRUE	.	0	0	.	0	0	.	.	chr14	50944061	50945062
chr14	50930582	50931583	1	ENSMUSG00000115338	ENSMUST00000226871	Pnp	FALSE	FALSE	FALSE	TRUE	.	0	0	.	0	0	.	.	chr14	50930582	50931583
chr14	20294197	20295198	1	ENSMUSG00000021809	ENSMUST00000223663	Nudt13	FALSE	FALSE	FALSE	TRUE	.	0	0	.	0	0	.	.	chr14	20294197	20295198
chr14	20294236	20295237	1	ENSMUSG00000021809	ENSMUST00000224311	Nudt13	FALSE	FALSE	FALSE	TRUE	.	0	0	.	0	0	.	.	chr14	20294236	20295237
chr14	20294215	20295216	1	ENSMUSG00000021809	ENSMUST00000225354	Nudt13	FALSE	FALSE	FALSE	TRUE	.	0	0	.	0	0	.	.	chr14	20294215	20295216
chr14	20294222	20295223	1	ENSMUSG00000021809	ENSMUST00000022343	Nudt13	FALSE	FALSE	FALSE	TRUE	.	0	0	.	0	0	.	.	chr14	20294222	20295223
chr14	20294244	20295245	1	ENSMUSG00000021809	ENSMUST00000224674	Nudt13	FALSE	FALSE	FALSE	TRUE	.	0	0	.	0	0	.	.	chr14	20294244	20295245
chr14	20294214	20295215	1	ENSMUSG00000021809	ENSMUST00000225722	Nudt13	FALSE	FALSE	FALSE	TRUE	.	0	0	.	0	0	.	.	chr14	20294214	20295215
chr14	20309990	20310991	1	ENSMUSG00000021809	ENSMUST00000223566	Nudt13	FALSE	FALSE	FALSE	TRUE	.	0	0	.	0	0	.	.	chr14	20309990	20310991
chr14	20294240	20295241	1	ENSMUSG00000021809	ENSMUST00000224354	Nudt13	FALSE	FALSE	FALSE	TRUE	.	0	0	.	0	0	.	.	chr14	20294240	20295241
chr14	20294246	20295247	1	ENSMUSG00000021809	ENSMUST00000225314	Nudt13	FALSE	FALSE	FALSE	TRUE	.	0	0	.	0	0	.	.	chr14	20294246	20295247
chr14	20294248	20295249	1	ENSMUSG00000021809	ENSMUST00000224377	Nudt13	FALSE	FALSE	FALSE	TRUE	.	0	0	.	0	0	.	.	chr14	20294248	20295249
chr14	20294242	20295243	1	ENSMUSG00000021809	ENSMUST00000225440	Nudt13	FALSE	FALSE	FALSE	TRUE	.	0	0	.	0	0	.	.	chr14	20294242	20295243
chr14	20294223	20295224	1	ENSMUSG00000021809	ENSMUST00000223941	Nudt13	FALSE	FALSE	FALSE	TRUE	.	0	0	.	0	0	.	.	chr14	20294223	20295224
chr14	20310929	20311930	1	ENSMUSG00000021809	ENSMUST00000225728	Nudt13	FALSE	FALSE	FALSE	TRUE	.	0	0	.	0	0	.	.	chr14	20310929	20311930
chr14	20300002	20301003	1	ENSMUSG00000021809	ENSMUST00000225442	Nudt13	FALSE	FALSE	FALSE	TRUE	.	0	0	.	0	0	.	.	chr14	20300002	20301003
chr14	20294223	20295224	1	ENSMUSG00000021809	ENSMUST00000224066	Nudt13	FALSE	FALSE	FALSE	TRUE	.	0	0	.	0	0	.	.	chr14	20294223	20295224
chr14	20294267	20295268	1	ENSMUSG00000021809	ENSMUST00000224169	Nudt13	FALSE	FALSE	FALSE	TRUE	.	0	0	.	0	0	.	.	chr14	20294267	20295268
chr14	65836860	65837861	1	ENSMUSG00000022035	ENSMUST00000226027	Ccdc25	FALSE	FALSE	FALSE	TRUE	.	0	0	.	0	0	.	.	chr14	65836860	65837861
chr14	65836802	65837803	1	ENSMUSG00000022035	ENSMUST00000022614	Ccdc25	FALSE	FALSE	FALSE	TRUE	.	0	0	.	0	0	.	.	chr14	65836802	65837803
chr14	65836857	65837858	1	ENSMUSG00000022035	ENSMUST00000225823	Ccdc25	FALSE	FALSE	FALSE	TRUE	.	0	0	.	0	0	.	.	chr14	65836857	65837858
chr14	55603071	55604072	1	ENSMUSG00000002325	ENSMUST00000134863	Irf9	FALSE	TRUE	FALSE	FALSE	.	0	0	chr14	55603894	55604425	element_115	1	chr14	55603071	55604072
chr14	55606775	55607776	1	ENSMUSG00000002325	ENSMUST00000126269	Irf9	FALSE	FALSE	FALSE	TRUE	.	0	0	.	0	0	.	.	chr14	55606775	55607776
chr14	55604079	55605080	1	ENSMUSG00000002325	ENSMUST00000138037	Irf9	FALSE	TRUE	FALSE	FALSE	.	0	0	chr14	55603894	55604425	element_115	1	chr14	55604079	55605080
chr14	55603485	55604486	1	ENSMUSG00000002325	ENSMUST00000130697	Irf9	FALSE	TRUE	FALSE	FALSE	.	0	0	chr14	55603894	55604425	element_115	1	chr14	55603485	55604486
chr14	55605320	55606321	1	ENSMUSG00000002325	ENSMUST00000145680	Irf9	FALSE	FALSE	FALSE	TRUE	.	0	0	.	0	0	.	.	chr14	55605320	55606321
chr14	55604077	55605078	1	ENSMUSG00000002325	ENSMUST00000136109	Irf9	FALSE	TRUE	FALSE	FALSE	.	0	0	chr14	55603894	55604425	element_115	1	chr14	55604077	55605078
chr14	55607318	55608319	1	ENSMUSG00000002325	ENSMUST00000226275	Irf9	FALSE	FALSE	FALSE	TRUE	.	0	0	.	0	0	.	.	chr14	55607318	55608319
chr14	55600656	55601657	1	ENSMUSG00000047098	ENSMUST00000227708	Rnf31	FALSE	FALSE	FALSE	TRUE	.	0	0	.	0	0	.	.	chr14	55600656	55601657
chr14	55592381	55593382	1	ENSMUSG00000047098	ENSMUST00000133903	Rnf31	FALSE	FALSE	FALSE	TRUE	.	0	0	.	0	0	.	.	chr14	55592381	55593382
chr14	55591208	55592209	1	ENSMUSG00000047098	ENSMUST00000019443	Rnf31	FALSE	FALSE	FALSE	TRUE	.	0	0	.	0	0	.	.	chr14	55591208	55592209
chr14	55591775	55592776	1	ENSMUSG00000047098	ENSMUST00000140178	Rnf31	FALSE	FALSE	FALSE	TRUE	.	0	0	.	0	0	.	.	chr14	55591775	55592776
chr14	55591967	55592968	1	ENSMUSG00000047098	ENSMUST00000126544	Rnf31	FALSE	FALSE	FALSE	TRUE	.	0	0	.	0	0	.	.	chr14	55591967	55592968
chr14	55591244	55592245	1	ENSMUSG00000047098	ENSMUST00000137296	Rnf31	FALSE	FALSE	FALSE	TRUE	.	0	0	.	0	0	.	.	chr14	55591244	55592245
chr14	55594625	55595626	1	ENSMUSG00000047098	ENSMUST00000227664	Rnf31	FALSE	FALSE	FALSE	TRUE	.	0	0	.	0	0	.	.	chr14	55594625	55595626
chr14	55578075	55579076	1	ENSMUSG00000022216	ENSMUST00000089619	Psme1	FALSE	FALSE	FALSE	TRUE	.	0	0	.	0	0	.	.	chr14	55578075	55579076
chr14	55577956	55578957	1	ENSMUSG00000022216	ENSMUST00000173544	Psme1	FALSE	FALSE	FALSE	TRUE	.	0	0	.	0	0	.	.	chr14	55577956	55578957
chr14	55579464	55580465	1	ENSMUSG00000022216	ENSMUST00000174148	Psme1	FALSE	FALSE	FALSE	TRUE	.	0	0	.	0	0	.	.	chr14	55579464	55580465
chr14	55578038	55579039	1	ENSMUSG00000022216	ENSMUST00000174563	Psme1	FALSE	FALSE	FALSE	TRUE	.	0	0	.	0	0	.	.	chr14	55578038	55579039
chr14	55577986	55578987	1	ENSMUSG00000022216	ENSMUST00000173388	Psme1	FALSE	FALSE	FALSE	TRUE	.	0	0	.	0	0	.	.	chr14	55577986	55578987
chr14	55578075	55579076	1	ENSMUSG00000022216	ENSMUST00000172738	Psme1	FALSE	FALSE	FALSE	TRUE	.	0	0	.	0	0	.	.	chr14	55578075	55579076
chr14	55577623	55578624	1	ENSMUSG00000022216	ENSMUST00000174484	Psme1	FALSE	FALSE	FALSE	TRUE	.	0	0	.	0	0	.	.	chr14	55577623	55578624
chr14	55577975	55578976	1	ENSMUSG00000022216	ENSMUST00000228834	Psme1	FALSE	FALSE	FALSE	TRUE	.	0	0	.	0	0	.	.	chr14	55577975	55578976
chr14	55577860	55578861	1	ENSMUSG00000022216	ENSMUST00000174259	Psme1	FALSE	FALSE	FALSE	TRUE	.	0	0	.	0	0	.	.	chr14	55577860	55578861
chr14	55577905	55578906	1	ENSMUSG00000022216	ENSMUST00000172941	Psme1	FALSE	FALSE	FALSE	TRUE	.	0	0	.	0	0	.	.	chr14	55577905	55578906
chr14	55580248	55581249	1	ENSMUSG00000022216	ENSMUST00000174419	Psme1	FALSE	FALSE	FALSE	TRUE	.	0	0	.	0	0	.	.	chr14	55580248	55581249
chr14	55577968	55578969	1	ENSMUSG00000022216	ENSMUST00000174791	Psme1	FALSE	FALSE	FALSE	TRUE	.	0	0	.	0	0	.	.	chr14	55577968	55578969
chr14	55579534	55580535	1	ENSMUSG00000022216	ENSMUST00000173113	Psme1	FALSE	FALSE	FALSE	TRUE	.	0	0	.	0	0	.	.	chr14	55579534	55580535
chr14	59259715	59260716	-1	ENSMUSG00000090881	ENSMUST00000168702	Gm6904	FALSE	FALSE	FALSE	TRUE	.	0	0	.	0	0	.	.	chr14	59259715	59260716
chr14	59259679	59260680	-1	ENSMUSG00000090881	ENSMUST00000224042	Gm6904	FALSE	FALSE	FALSE	TRUE	.	0	0	.	0	0	.	.	chr14	59259679	59260680
chr14	59297021	59298022	-1	ENSMUSG00000044703	ENSMUST00000062307	Phf11a	FALSE	FALSE	FALSE	TRUE	.	0	0	.	0	0	.	.	chr14	59297021	59298022
chr14	54986917	54987918	-1	ENSMUSG00000053093	ENSMUST00000149852	Myh7	FALSE	FALSE	FALSE	TRUE	.	0	0	.	0	0	.	.	chr14	54986917	54987918
chr14	54994125	54995126	-1	ENSMUSG00000053093	ENSMUST00000102803	Myh7	FALSE	FALSE	FALSE	TRUE	.	0	0	.	0	0	.	.	chr14	54994125	54995126
chr14	54993190	54994191	-1	ENSMUSG00000053093	ENSMUST00000228837	Myh7	FALSE	FALSE	FALSE	TRUE	.	0	0	.	0	0	.	.	chr14	54993190	54994191
chr14	54994125	54995126	-1	ENSMUSG00000053093	ENSMUST00000168485	Myh7	FALSE	FALSE	FALSE	TRUE	.	0	0	.	0	0	.	.	chr14	54994125	54995126
chr14	54994047	54995048	-1	ENSMUSG00000053093	ENSMUST00000153783	Myh7	FALSE	FALSE	FALSE	TRUE	.	0	0	.	0	0	.	.	chr14	54994047	54995048
chr14	54973027	54974028	-1	ENSMUSG00000053093	ENSMUST00000227401	Myh7	FALSE	FALSE	FALSE	TRUE	.	0	0	.	0	0	.	.	chr14	54973027	54974028
chr14	54994042	54995043	-1	ENSMUSG00000053093	ENSMUST00000226424	Myh7	FALSE	FALSE	FALSE	TRUE	.	0	0	.	0	0	.	.	chr14	54994042	54995043
chr14	54994042	54995043	-1	ENSMUSG00000053093	ENSMUST00000227518	Myh7	FALSE	FALSE	FALSE	TRUE	.	0	0	.	0	0	.	.	chr14	54994042	54995043
chr14	59340850	59341851	-1	ENSMUSG00000091649	ENSMUST00000166121	Phf11b	FALSE	FALSE	FALSE	TRUE	.	0	0	.	0	0	.	.	chr14	59340850	59341851
chr14	59364909	59365910	-1	ENSMUSG00000068245	ENSMUST00000161031	Phf11d	FALSE	TRUE	FALSE	FALSE	.	0	0	chr14	59365219	59365663	element_116	3	chr14	59364909	59365910
chr14	59364969	59365970	-1	ENSMUSG00000068245	ENSMUST00000095157	Phf11d	FALSE	TRUE	FALSE	FALSE	.	0	0	chr14	59365219	59365663	element_116	3	chr14	59364969	59365970
chr14	59364943	59365944	-1	ENSMUSG00000068245	ENSMUST00000160425	Phf11d	FALSE	TRUE	FALSE	FALSE	.	0	0	chr14	59365219	59365663	element_116	3	chr14	59364943	59365944
chr14	59364939	59365940	-1	ENSMUSG00000068245	ENSMUST00000161754	Phf11d	FALSE	TRUE	FALSE	FALSE	.	0	0	chr14	59365219	59365663	element_116	3	chr14	59364939	59365940
chr14	59394880	59395881	-1	ENSMUSG00000091144	ENSMUST00000166912	Phf11c	FALSE	FALSE	FALSE	TRUE	.	0	0	.	0	0	.	.	chr14	59394880	59395881
chr14	59409154	59410155	-1	ENSMUSG00000071350	ENSMUST00000159640	Setdb2	FALSE	FALSE	FALSE	TRUE	.	0	0	.	0	0	.	.	chr14	59409154	59410155
chr14	59440383	59441384	-1	ENSMUSG00000071350	ENSMUST00000161459	Setdb2	FALSE	FALSE	FALSE	TRUE	.	0	0	.	0	0	.	.	chr14	59440383	59441384
chr14	59440372	59441373	-1	ENSMUSG00000071350	ENSMUST00000160904	Setdb2	FALSE	FALSE	FALSE	TRUE	.	0	0	.	0	0	.	.	chr14	59440372	59441373
chr14	59440374	59441375	-1	ENSMUSG00000071350	ENSMUST00000111253	Setdb2	FALSE	FALSE	FALSE	TRUE	.	0	0	.	0	0	.	.	chr14	59440374	59441375
chr14	59440376	59441377	-1	ENSMUSG00000071350	ENSMUST00000095775	Setdb2	FALSE	FALSE	FALSE	TRUE	.	0	0	.	0	0	.	.	chr14	59440376	59441377
chr14	72709496	72710497	-1	ENSMUSG00000033487	ENSMUST00000162922	Fndc3a	FALSE	FALSE	FALSE	TRUE	.	0	0	.	0	0	.	.	chr14	72709496	72710497
chr14	72709342	72710343	-1	ENSMUSG00000033487	ENSMUST00000163013	Fndc3a	FALSE	FALSE	FALSE	TRUE	.	0	0	.	0	0	.	.	chr14	72709342	72710343
chr14	72709502	72710503	-1	ENSMUSG00000033487	ENSMUST00000089017	Fndc3a	FALSE	FALSE	FALSE	TRUE	.	0	0	.	0	0	.	.	chr14	72709502	72710503
chr14	72651575	72652576	-1	ENSMUSG00000033487	ENSMUST00000161550	Fndc3a	FALSE	FALSE	FALSE	TRUE	.	0	0	.	0	0	.	.	chr14	72651575	72652576
chr14	72602461	72603462	-1	ENSMUSG00000033487	ENSMUST00000162825	Fndc3a	FALSE	FALSE	FALSE	TRUE	.	0	0	.	0	0	.	.	chr14	72602461	72603462
chr14	72709041	72710042	-1	ENSMUSG00000033487	ENSMUST00000162478	Fndc3a	FALSE	FALSE	FALSE	TRUE	.	0	0	.	0	0	.	.	chr14	72709041	72710042
chr14	72564217	72565218	-1	ENSMUSG00000033487	ENSMUST00000159144	Fndc3a	FALSE	FALSE	FALSE	TRUE	.	0	0	.	0	0	.	.	chr14	72564217	72565218
chr14	56551984	56552985	-1	ENSMUSG00000064128	ENSMUST00000229861	Cenpj	FALSE	FALSE	FALSE	TRUE	.	0	0	.	0	0	.	.	chr14	56551984	56552985
chr14	56574924	56575925	-1	ENSMUSG00000064128	ENSMUST00000224748	Cenpj	FALSE	FALSE	FALSE	TRUE	.	0	0	.	0	0	.	.	chr14	56574924	56575925
chr14	56571345	56572346	-1	ENSMUSG00000064128	ENSMUST00000065302	Cenpj	FALSE	FALSE	FALSE	TRUE	.	0	0	.	0	0	.	.	chr14	56571345	56572346
chr14	56574881	56575882	-1	ENSMUSG00000064128	ENSMUST00000225951	Cenpj	FALSE	FALSE	FALSE	TRUE	.	0	0	.	0	0	.	.	chr14	56574881	56575882
chr14	56529656	56530657	-1	ENSMUSG00000064128	ENSMUST00000226026	Cenpj	FALSE	FALSE	FALSE	TRUE	.	0	0	.	0	0	.	.	chr14	56529656	56530657
chr14	55590586	55591587	-1	ENSMUSG00000079197	ENSMUST00000161807	Psme2	FALSE	FALSE	FALSE	TRUE	.	0	0	.	0	0	.	.	chr14	55590586	55591587
chr14	55588103	55589104	-1	ENSMUSG00000079197	ENSMUST00000161573	Psme2	FALSE	FALSE	FALSE	TRUE	.	0	0	.	0	0	.	.	chr14	55588103	55589104
chr14	55589010	55590011	-1	ENSMUSG00000079197	ENSMUST00000162700	Psme2	FALSE	FALSE	FALSE	TRUE	.	0	0	.	0	0	.	.	chr14	55589010	55590011
chr14	55589648	55590649	-1	ENSMUSG00000079197	ENSMUST00000161027	Psme2	FALSE	FALSE	FALSE	TRUE	.	0	0	.	0	0	.	.	chr14	55589648	55590649
chr14	55590447	55591448	-1	ENSMUSG00000079197	ENSMUST00000159845	Psme2	FALSE	FALSE	FALSE	TRUE	.	0	0	.	0	0	.	.	chr14	55590447	55591448
chr14	55590363	55591364	-1	ENSMUSG00000079197	ENSMUST00000159282	Psme2	FALSE	FALSE	FALSE	TRUE	.	0	0	.	0	0	.	.	chr14	55590363	55591364
chr14	55590394	55591395	-1	ENSMUSG00000079197	ENSMUST00000159297	Psme2	FALSE	FALSE	FALSE	TRUE	.	0	0	.	0	0	.	.	chr14	55590394	55591395
chr14	55590600	55591601	-1	ENSMUSG00000079197	ENSMUST00000111378	Psme2	FALSE	FALSE	FALSE	TRUE	.	0	0	.	0	0	.	.	chr14	55590600	55591601
chr14	55590612	55591613	-1	ENSMUSG00000079197	ENSMUST00000159687	Psme2	FALSE	FALSE	FALSE	TRUE	.	0	0	.	0	0	.	.	chr14	55590612	55591613
chr14	55590472	55591473	-1	ENSMUSG00000079197	ENSMUST00000162496	Psme2	FALSE	FALSE	FALSE	TRUE	.	0	0	.	0	0	.	.	chr14	55590472	55591473
chr15	84769386	84770387	1	ENSMUSG00000078954	ENSMUST00000169075	Arhgap8	FALSE	FALSE	FALSE	TRUE	.	0	0	.	0	0	.	.	chr15	84769386	84770387
chr15	84732392	84733393	1	ENSMUSG00000078954	ENSMUST00000168811	Arhgap8	FALSE	FALSE	FALSE	TRUE	.	0	0	.	0	0	.	.	chr15	84732392	84733393
chr15	84752280	84753281	1	ENSMUSG00000078954	ENSMUST00000100464	Arhgap8	FALSE	FALSE	FALSE	TRUE	.	0	0	.	0	0	.	.	chr15	84752280	84753281
chr15	84741475	84742476	1	ENSMUSG00000078954	ENSMUST00000163312	Arhgap8	FALSE	FALSE	FALSE	TRUE	.	0	0	.	0	0	.	.	chr15	84741475	84742476
chr15	84719583	84720584	1	ENSMUSG00000078954	ENSMUST00000167499	Arhgap8	FALSE	FALSE	FALSE	TRUE	.	0	0	.	0	0	.	.	chr15	84719583	84720584
chr15	84719552	84720553	1	ENSMUSG00000078954	ENSMUST00000172307	Arhgap8	FALSE	FALSE	FALSE	TRUE	.	0	0	.	0	0	.	.	chr15	84719552	84720553
chr15	84719552	84720553	1	ENSMUSG00000078954	ENSMUST00000006029	Arhgap8	FALSE	FALSE	FALSE	TRUE	.	0	0	.	0	0	.	.	chr15	84719552	84720553
chr15	75866090	75867091	1	ENSMUSG00000022575	ENSMUST00000231170	Gsdmd	FALSE	FALSE	FALSE	TRUE	.	0	0	.	0	0	.	.	chr15	75866090	75867091
chr15	75861839	75862840	1	ENSMUSG00000022575	ENSMUST00000230514	Gsdmd	FALSE	FALSE	FALSE	TRUE	.	0	0	.	0	0	.	.	chr15	75861839	75862840
chr15	75861879	75862880	1	ENSMUSG00000022575	ENSMUST00000229331	Gsdmd	FALSE	FALSE	FALSE	TRUE	.	0	0	.	0	0	.	.	chr15	75861879	75862880
chr15	75864194	75865195	1	ENSMUSG00000022575	ENSMUST00000230571	Gsdmd	FALSE	FALSE	FALSE	TRUE	.	0	0	.	0	0	.	.	chr15	75864194	75865195
chr15	75861827	75862828	1	ENSMUSG00000022575	ENSMUST00000023238	Gsdmd	FALSE	FALSE	FALSE	TRUE	.	0	0	.	0	0	.	.	chr15	75861827	75862828
chr15	75861864	75862865	1	ENSMUSG00000022575	ENSMUST00000230881	Gsdmd	FALSE	FALSE	FALSE	TRUE	.	0	0	.	0	0	.	.	chr15	75861864	75862865
chr15	98892851	98893852	1	ENSMUSG00000116033	ENSMUST00000230242	AC161165.2	FALSE	FALSE	FALSE	TRUE	.	0	0	.	0	0	.	.	chr15	98892851	98893852
chr15	77728539	77729540	1	ENSMUSG00000068246	ENSMUST00000230979	Apol9b	FALSE	FALSE	FALSE	TRUE	.	0	0	.	0	0	.	.	chr15	77728539	77729540
chr15	77728594	77729595	1	ENSMUSG00000068246	ENSMUST00000109775	Apol9b	FALSE	FALSE	FALSE	TRUE	.	0	0	.	0	0	.	.	chr15	77728594	77729595
chr15	77728648	77729649	1	ENSMUSG00000068246	ENSMUST00000230742	Apol9b	FALSE	FALSE	FALSE	TRUE	.	0	0	.	0	0	.	.	chr15	77728648	77729649
chr15	77733104	77734105	1	ENSMUSG00000068246	ENSMUST00000230377	Apol9b	FALSE	FALSE	FALSE	TRUE	.	0	0	.	0	0	.	.	chr15	77733104	77734105
chr15	58888729	58889730	1	ENSMUSG00000037075	ENSMUST00000036904	Rnf139	FALSE	FALSE	FALSE	TRUE	.	0	0	.	0	0	.	.	chr15	58888729	58889730
chr15	58899637	58900638	1	ENSMUSG00000037075	ENSMUST00000226908	Rnf139	FALSE	FALSE	FALSE	TRUE	.	0	0	.	0	0	.	.	chr15	58899637	58900638
chr15	78982541	78983542	1	ENSMUSG00000033088	ENSMUST00000109687	Triobp	FALSE	FALSE	FALSE	TRUE	.	0	0	.	0	0	.	.	chr15	78982541	78983542
chr15	78973553	78974554	1	ENSMUSG00000033088	ENSMUST00000229270	Triobp	FALSE	FALSE	FALSE	TRUE	.	0	0	.	0	0	.	.	chr15	78973553	78974554
chr15	79001682	79002683	1	ENSMUSG00000033088	ENSMUST00000129922	Triobp	FALSE	FALSE	FALSE	TRUE	.	0	0	.	0	0	.	.	chr15	79001682	79002683
chr15	78947224	78948225	1	ENSMUSG00000033088	ENSMUST00000140228	Triobp	FALSE	FALSE	FALSE	TRUE	.	0	0	.	0	0	.	.	chr15	78947224	78948225
chr15	78947419	78948420	1	ENSMUSG00000033088	ENSMUST00000229943	Triobp	FALSE	FALSE	FALSE	TRUE	.	0	0	.	0	0	.	.	chr15	78947419	78948420
chr15	78983205	78984206	1	ENSMUSG00000033088	ENSMUST00000144151	Triobp	FALSE	FALSE	FALSE	TRUE	.	0	0	.	0	0	.	.	chr15	78983205	78984206
chr15	78982577	78983578	1	ENSMUSG00000033088	ENSMUST00000130663	Triobp	FALSE	FALSE	FALSE	TRUE	.	0	0	.	0	0	.	.	chr15	78982577	78983578
chr15	78947224	78948225	1	ENSMUSG00000033088	ENSMUST00000109689	Triobp	FALSE	FALSE	FALSE	TRUE	.	0	0	.	0	0	.	.	chr15	78947224	78948225
chr15	78982606	78983607	1	ENSMUSG00000033088	ENSMUST00000109688	Triobp	FALSE	FALSE	FALSE	TRUE	.	0	0	.	0	0	.	.	chr15	78982606	78983607
chr15	78947745	78948746	1	ENSMUSG00000033088	ENSMUST00000137934	Triobp	FALSE	FALSE	FALSE	TRUE	.	0	0	.	0	0	.	.	chr15	78947745	78948746
chr15	79001482	79002483	1	ENSMUSG00000033088	ENSMUST00000229535	Triobp	FALSE	FALSE	FALSE	TRUE	.	0	0	.	0	0	.	.	chr15	79001482	79002483
chr15	78947224	78948225	1	ENSMUSG00000033088	ENSMUST00000109690	Triobp	FALSE	FALSE	FALSE	TRUE	.	0	0	.	0	0	.	.	chr15	78947224	78948225
chr15	88864420	88865421	1	ENSMUSG00000035828	ENSMUST00000229969	Pim3	FALSE	FALSE	FALSE	TRUE	.	0	0	.	0	0	.	.	chr15	88864420	88865421
chr15	88861686	88862687	1	ENSMUSG00000035828	ENSMUST00000042818	Pim3	FALSE	FALSE	FALSE	TRUE	.	0	0	.	0	0	.	.	chr15	88861686	88862687
chr15	74954664	74955665	1	ENSMUSG00000022587	ENSMUST00000187284	Ly6e	FALSE	FALSE	FALSE	TRUE	.	0	0	.	0	0	.	.	chr15	74954664	74955665
chr15	74955153	74956154	1	ENSMUSG00000022587	ENSMUST00000191436	Ly6e	FALSE	FALSE	FALSE	TRUE	.	0	0	.	0	0	.	.	chr15	74955153	74956154
chr15	74954760	74955761	1	ENSMUSG00000022587	ENSMUST00000191127	Ly6e	FALSE	FALSE	FALSE	TRUE	.	0	0	.	0	0	.	.	chr15	74954760	74955761
chr15	74954741	74955742	1	ENSMUSG00000022587	ENSMUST00000185863	Ly6e	FALSE	FALSE	FALSE	TRUE	.	0	0	.	0	0	.	.	chr15	74954741	74955742
chr15	74954642	74955643	1	ENSMUSG00000022587	ENSMUST00000189186	Ly6e	FALSE	FALSE	FALSE	TRUE	.	0	0	.	0	0	.	.	chr15	74954642	74955643
chr15	74954551	74955552	1	ENSMUSG00000022587	ENSMUST00000188866	Ly6e	FALSE	FALSE	FALSE	TRUE	.	0	0	.	0	0	.	.	chr15	74954551	74955552
chr15	74955183	74956184	1	ENSMUSG00000022587	ENSMUST00000191439	Ly6e	FALSE	FALSE	FALSE	TRUE	.	0	0	.	0	0	.	.	chr15	74955183	74956184
chr15	74954571	74955572	1	ENSMUSG00000022587	ENSMUST00000051698	Ly6e	FALSE	FALSE	FALSE	TRUE	.	0	0	.	0	0	.	.	chr15	74954571	74955572
chr15	74955172	74956173	1	ENSMUSG00000022587	ENSMUST00000191145	Ly6e	FALSE	FALSE	FALSE	TRUE	.	0	0	.	0	0	.	.	chr15	74955172	74956173
chr15	74955168	74956169	1	ENSMUSG00000022587	ENSMUST00000188503	Ly6e	FALSE	FALSE	FALSE	TRUE	.	0	0	.	0	0	.	.	chr15	74955168	74956169
chr15	74954551	74955552	1	ENSMUSG00000022587	ENSMUST00000169343	Ly6e	FALSE	FALSE	FALSE	TRUE	.	0	0	.	0	0	.	.	chr15	74954551	74955552
chr15	74955166	74956167	1	ENSMUSG00000022587	ENSMUST00000186927	Ly6e	FALSE	FALSE	FALSE	TRUE	.	0	0	.	0	0	.	.	chr15	74955166	74956167
chr15	74954606	74955607	1	ENSMUSG00000022587	ENSMUST00000187606	Ly6e	FALSE	FALSE	FALSE	TRUE	.	0	0	.	0	0	.	.	chr15	74954606	74955607
chr15	74954686	74955687	1	ENSMUSG00000022587	ENSMUST00000185861	Ly6e	FALSE	FALSE	FALSE	TRUE	.	0	0	.	0	0	.	.	chr15	74954686	74955687
chr15	74956055	74957056	1	ENSMUSG00000022587	ENSMUST00000188042	Ly6e	FALSE	FALSE	FALSE	TRUE	.	0	0	.	0	0	.	.	chr15	74956055	74957056
chr15	74954678	74955679	1	ENSMUSG00000022587	ENSMUST00000190810	Ly6e	FALSE	FALSE	FALSE	TRUE	.	0	0	.	0	0	.	.	chr15	74954678	74955679
chr15	77044776	77045777	1	ENSMUSG00000033576	ENSMUST00000149569	Apol6	FALSE	TRUE	FALSE	FALSE	.	0	0	chr15	77044875	77045108	element_131	1	chr15	77044776	77045777
chr15	77044706	77045707	1	ENSMUSG00000033576	ENSMUST00000129468	Apol6	FALSE	TRUE	FALSE	FALSE	.	0	0	chr15	77044875	77045108	element_131	1	chr15	77044706	77045707
chr15	77044575	77045576	1	ENSMUSG00000033576	ENSMUST00000127957	Apol6	FALSE	TRUE	FALSE	FALSE	.	0	0	chr15	77044875	77045108	element_131	1	chr15	77044575	77045576
chr15	77044987	77045988	1	ENSMUSG00000033576	ENSMUST00000148197	Apol6	FALSE	TRUE	FALSE	FALSE	.	0	0	chr15	77044875	77045108	element_131	1	chr15	77044987	77045988
chr15	77052251	77053252	1	ENSMUSG00000033576	ENSMUST00000139304	Apol6	FALSE	FALSE	FALSE	TRUE	.	0	0	.	0	0	.	.	chr15	77052251	77053252
chr15	77044229	77045230	1	ENSMUSG00000033576	ENSMUST00000142405	Apol6	FALSE	TRUE	FALSE	FALSE	.	0	0	chr15	77044875	77045108	element_131	1	chr15	77044229	77045230
chr15	77044778	77045779	1	ENSMUSG00000033576	ENSMUST00000152949	Apol6	FALSE	TRUE	FALSE	FALSE	.	0	0	chr15	77044875	77045108	element_131	1	chr15	77044778	77045779
chr15	79899702	79900703	1	ENSMUSG00000009585	ENSMUST00000176644	Apobec3	FALSE	FALSE	FALSE	TRUE	.	0	0	.	0	0	.	.	chr15	79899702	79900703
chr15	79891159	79892160	1	ENSMUSG00000009585	ENSMUST00000177350	Apobec3	FALSE	FALSE	FALSE	TRUE	.	0	0	.	0	0	.	.	chr15	79891159	79892160
chr15	79891949	79892950	1	ENSMUSG00000009585	ENSMUST00000175849	Apobec3	FALSE	FALSE	FALSE	TRUE	.	0	0	.	0	0	.	.	chr15	79891949	79892950
chr15	79891558	79892559	1	ENSMUSG00000009585	ENSMUST00000176823	Apobec3	FALSE	FALSE	FALSE	TRUE	.	0	0	.	0	0	.	.	chr15	79891558	79892559
chr15	79894523	79895524	1	ENSMUSG00000009585	ENSMUST00000023054	Apobec3	FALSE	FALSE	FALSE	TRUE	.	0	0	.	0	0	.	.	chr15	79894523	79895524
chr15	79891903	79892904	1	ENSMUSG00000009585	ENSMUST00000175714	Apobec3	FALSE	FALSE	FALSE	TRUE	.	0	0	.	0	0	.	.	chr15	79891903	79892904
chr15	79891194	79892195	1	ENSMUSG00000009585	ENSMUST00000177483	Apobec3	FALSE	FALSE	FALSE	TRUE	.	0	0	.	0	0	.	.	chr15	79891194	79892195
chr15	79894761	79895762	1	ENSMUSG00000009585	ENSMUST00000176904	Apobec3	FALSE	FALSE	FALSE	TRUE	.	0	0	.	0	0	.	.	chr15	79894761	79895762
chr15	79899664	79900665	1	ENSMUSG00000009585	ENSMUST00000230135	Apobec3	FALSE	FALSE	FALSE	TRUE	.	0	0	.	0	0	.	.	chr15	79899664	79900665
chr15	79899842	79900843	1	ENSMUSG00000009585	ENSMUST00000230741	Apobec3	FALSE	FALSE	FALSE	TRUE	.	0	0	.	0	0	.	.	chr15	79899842	79900843
chr15	79891942	79892943	1	ENSMUSG00000009585	ENSMUST00000177006	Apobec3	FALSE	FALSE	FALSE	TRUE	.	0	0	.	0	0	.	.	chr15	79891942	79892943
chr15	79891911	79892912	1	ENSMUSG00000009585	ENSMUST00000176868	Apobec3	FALSE	FALSE	FALSE	TRUE	.	0	0	.	0	0	.	.	chr15	79891911	79892912
chr15	79891908	79892909	1	ENSMUSG00000009585	ENSMUST00000109620	Apobec3	FALSE	FALSE	FALSE	TRUE	.	0	0	.	0	0	.	.	chr15	79891908	79892909
chr15	79897323	79898324	1	ENSMUSG00000009585	ENSMUST00000175801	Apobec3	FALSE	FALSE	FALSE	TRUE	.	0	0	.	0	0	.	.	chr15	79897323	79898324
chr15	79891908	79892909	1	ENSMUSG00000009585	ENSMUST00000165537	Apobec3	FALSE	FALSE	FALSE	TRUE	.	0	0	.	0	0	.	.	chr15	79891908	79892909
chr15	79905623	79906624	1	ENSMUSG00000009585	ENSMUST00000175827	Apobec3	FALSE	FALSE	FALSE	TRUE	.	0	0	.	0	0	.	.	chr15	79905623	79906624
chr15	79891949	79892950	1	ENSMUSG00000009585	ENSMUST00000176325	Apobec3	FALSE	FALSE	FALSE	TRUE	.	0	0	.	0	0	.	.	chr15	79891949	79892950
chr15	79897248	79898249	1	ENSMUSG00000009585	ENSMUST00000230410	Apobec3	FALSE	FALSE	FALSE	TRUE	.	0	0	.	0	0	.	.	chr15	79897248	79898249
chr15	79891955	79892956	1	ENSMUSG00000009585	ENSMUST00000177098	Apobec3	FALSE	FALSE	FALSE	TRUE	.	0	0	.	0	0	.	.	chr15	79891955	79892956
chr15	79891948	79892949	1	ENSMUSG00000009585	ENSMUST00000175752	Apobec3	FALSE	FALSE	FALSE	TRUE	.	0	0	.	0	0	.	.	chr15	79891948	79892949
chr15	89195943	89196944	-1	ENSMUSG00000015377	ENSMUST00000229755	Dennd6b	FALSE	FALSE	FALSE	TRUE	.	0	0	.	0	0	.	.	chr15	89195943	89196944
chr15	89188343	89189344	-1	ENSMUSG00000015377	ENSMUST00000229416	Dennd6b	FALSE	FALSE	FALSE	TRUE	.	0	0	.	0	0	.	.	chr15	89188343	89189344
chr15	89195995	89196996	-1	ENSMUSG00000015377	ENSMUST00000229935	Dennd6b	FALSE	FALSE	FALSE	TRUE	.	0	0	.	0	0	.	.	chr15	89195995	89196996
chr15	89195964	89196965	-1	ENSMUSG00000015377	ENSMUST00000230823	Dennd6b	FALSE	FALSE	FALSE	TRUE	.	0	0	.	0	0	.	.	chr15	89195964	89196965
chr15	89195947	89196948	-1	ENSMUSG00000015377	ENSMUST00000078953	Dennd6b	FALSE	FALSE	FALSE	TRUE	.	0	0	.	0	0	.	.	chr15	89195947	89196948
chr15	89189808	89190809	-1	ENSMUSG00000015377	ENSMUST00000230111	Dennd6b	FALSE	FALSE	FALSE	TRUE	.	0	0	.	0	0	.	.	chr15	89189808	89190809
chr15	79403068	79404069	-1	ENSMUSG00000009035	ENSMUST00000074991	Tmem184b	FALSE	TRUE	FALSE	FALSE	.	0	0	chr15	79403263	79403813	element_133	4	chr15	79403068	79404069
chr15	79402418	79403419	-1	ENSMUSG00000009035	ENSMUST00000178522	Tmem184b	FALSE	TRUE	FALSE	FALSE	.	0	0	chr15	79403263	79403813	element_133	4	chr15	79402418	79403419
chr15	79402755	79403756	-1	ENSMUSG00000009035	ENSMUST00000228002	Tmem184b	FALSE	TRUE	FALSE	FALSE	.	0	0	chr15	79403263	79403813	element_133	4	chr15	79402755	79403756
chr15	79396355	79397356	-1	ENSMUSG00000009035	ENSMUST00000228472	Tmem184b	FALSE	FALSE	FALSE	TRUE	.	0	0	.	0	0	.	.	chr15	79396355	79397356
chr15	79369492	79370493	-1	ENSMUSG00000009035	ENSMUST00000226929	Tmem184b	FALSE	FALSE	FALSE	TRUE	.	0	0	.	0	0	.	.	chr15	79369492	79370493
chr15	79402738	79403739	-1	ENSMUSG00000009035	ENSMUST00000231076	Tmem184b	FALSE	TRUE	FALSE	FALSE	.	0	0	chr15	79403263	79403813	element_133	4	chr15	79402738	79403739
chr15	79402474	79403475	-1	ENSMUSG00000009035	ENSMUST00000229049	Tmem184b	FALSE	TRUE	FALSE	FALSE	.	0	0	chr15	79403263	79403813	element_133	4	chr15	79402474	79403475
chr15	79402775	79403776	-1	ENSMUSG00000009035	ENSMUST00000229003	Tmem184b	FALSE	TRUE	FALSE	FALSE	.	0	0	chr15	79403263	79403813	element_133	4	chr15	79402775	79403776
chr15	12548780	12549781	-1	ENSMUSG00000022197	ENSMUST00000187398	Pdzd2	FALSE	TRUE	FALSE	FALSE	.	0	0	chr15	12549557	12549809	element_122	1	chr15	12548780	12549781
chr15	12411879	12412880	-1	ENSMUSG00000022197	ENSMUST00000191339	Pdzd2	FALSE	FALSE	FALSE	TRUE	.	0	0	.	0	0	.	.	chr15	12411879	12412880
chr15	12548777	12549778	-1	ENSMUSG00000022197	ENSMUST00000190929	Pdzd2	FALSE	TRUE	FALSE	FALSE	.	0	0	chr15	12549557	12549809	element_122	1	chr15	12548777	12549778
chr15	12598555	12599556	-1	ENSMUSG00000022197	ENSMUST00000189746	Pdzd2	FALSE	FALSE	FALSE	TRUE	.	0	0	.	0	0	.	.	chr15	12598555	12599556
chr15	12592055	12593056	-1	ENSMUSG00000022197	ENSMUST00000075317	Pdzd2	FALSE	FALSE	FALSE	TRUE	.	0	0	.	0	0	.	.	chr15	12592055	12593056
chr15	12739423	12740424	-1	ENSMUSG00000022197	ENSMUST00000189469	Pdzd2	FALSE	FALSE	FALSE	TRUE	.	0	0	.	0	0	.	.	chr15	12739423	12740424
chr15	12549284	12550285	-1	ENSMUSG00000022197	ENSMUST00000185619	Pdzd2	FALSE	TRUE	FALSE	FALSE	.	0	0	chr15	12549557	12549809	element_122	1	chr15	12549284	12550285
chr15	12549376	12550377	-1	ENSMUSG00000022197	ENSMUST00000189324	Pdzd2	FALSE	TRUE	FALSE	FALSE	.	0	0	chr15	12549557	12549809	element_122	1	chr15	12549376	12550377
chr15	12493058	12494059	-1	ENSMUSG00000022197	ENSMUST00000186113	Pdzd2	FALSE	FALSE	FALSE	TRUE	.	0	0	.	0	0	.	.	chr15	12493058	12494059
chr15	77397950	77398951	-1	ENSMUSG00000010601	ENSMUST00000175789	Apol7a	FALSE	FALSE	FALSE	TRUE	.	0	0	.	0	0	.	.	chr15	77397950	77398951
chr15	77396433	77397434	-1	ENSMUSG00000010601	ENSMUST00000177135	Apol7a	FALSE	FALSE	FALSE	TRUE	.	0	0	.	0	0	.	.	chr15	77396433	77397434
chr15	77398609	77399610	-1	ENSMUSG00000010601	ENSMUST00000176074	Apol7a	FALSE	FALSE	FALSE	TRUE	.	0	0	.	0	0	.	.	chr15	77398609	77399610
chr15	77395957	77396958	-1	ENSMUSG00000010601	ENSMUST00000010745	Apol7a	FALSE	FALSE	FALSE	TRUE	.	0	0	.	0	0	.	.	chr15	77395957	77396958
chr15	77398585	77399586	-1	ENSMUSG00000010601	ENSMUST00000175919	Apol7a	FALSE	FALSE	FALSE	TRUE	.	0	0	.	0	0	.	.	chr15	77398585	77399586
chr15	77406064	77407065	-1	ENSMUSG00000057346	ENSMUST00000231161	Apol9a	FALSE	FALSE	FALSE	TRUE	.	0	0	.	0	0	.	.	chr15	77406064	77407065
chr15	77410526	77411527	-1	ENSMUSG00000057346	ENSMUST00000229175	Apol9a	FALSE	FALSE	FALSE	TRUE	.	0	0	.	0	0	.	.	chr15	77410526	77411527
chr15	77410634	77411635	-1	ENSMUSG00000057346	ENSMUST00000081776	Apol9a	FALSE	FALSE	FALSE	TRUE	.	0	0	.	0	0	.	.	chr15	77410634	77411635
chr15	77410533	77411534	-1	ENSMUSG00000057346	ENSMUST00000089452	Apol9a	FALSE	FALSE	FALSE	TRUE	.	0	0	.	0	0	.	.	chr15	77410533	77411534
chr15	77595624	77596625	-1	ENSMUSG00000050014	ENSMUST00000089465	Apol10b	FALSE	FALSE	FALSE	TRUE	.	0	0	.	0	0	.	.	chr15	77595624	77596625
chr15	76242919	76243920	-1	ENSMUSG00000063268	ENSMUST00000165738	Parp10	FALSE	TRUE	FALSE	FALSE	.	0	0	chr15	76243155	76243588	element_129	1	chr15	76242919	76243920
chr15	76233752	76234753	-1	ENSMUSG00000063268	ENSMUST00000169255	Parp10	FALSE	FALSE	FALSE	TRUE	.	0	0	.	0	0	.	.	chr15	76233752	76234753
chr15	76242933	76243934	-1	ENSMUSG00000063268	ENSMUST00000166151	Parp10	FALSE	TRUE	FALSE	FALSE	.	0	0	chr15	76243155	76243588	element_129	1	chr15	76242933	76243934
chr15	76242940	76243941	-1	ENSMUSG00000063268	ENSMUST00000075689	Parp10	FALSE	TRUE	FALSE	FALSE	.	0	0	chr15	76243155	76243588	element_129	1	chr15	76242940	76243941
chr15	76233222	76234223	-1	ENSMUSG00000063268	ENSMUST00000170226	Parp10	FALSE	FALSE	FALSE	TRUE	.	0	0	.	0	0	.	.	chr15	76233222	76234223
chr15	76233972	76234973	-1	ENSMUSG00000063268	ENSMUST00000170851	Parp10	FALSE	FALSE	FALSE	TRUE	.	0	0	.	0	0	.	.	chr15	76233972	76234973
chr15	42676476	42677477	-1	ENSMUSG00000022309	ENSMUST00000022921	Angpt1	FALSE	FALSE	FALSE	TRUE	.	0	0	.	0	0	.	.	chr15	42676476	42677477
chr15	42676248	42677249	-1	ENSMUSG00000022309	ENSMUST00000227738	Angpt1	FALSE	FALSE	FALSE	TRUE	.	0	0	.	0	0	.	.	chr15	42676248	42677249
chr15	74997486	74998487	-1	ENSMUSG00000075602	ENSMUST00000187171	Ly6a	FALSE	FALSE	FALSE	TRUE	.	0	0	.	0	0	.	.	chr15	74997486	74998487
chr15	74997133	74998134	-1	ENSMUSG00000075602	ENSMUST00000023248	Ly6a	FALSE	FALSE	FALSE	TRUE	.	0	0	.	0	0	.	.	chr15	74997133	74998134
chr15	74997406	74998407	-1	ENSMUSG00000075602	ENSMUST00000189068	Ly6a	FALSE	FALSE	FALSE	TRUE	.	0	0	.	0	0	.	.	chr15	74997406	74998407
chr15	74997530	74998531	-1	ENSMUSG00000075602	ENSMUST00000187994	Ly6a	FALSE	FALSE	FALSE	TRUE	.	0	0	.	0	0	.	.	chr15	74997530	74998531
chr15	74997334	74998335	-1	ENSMUSG00000075602	ENSMUST00000190188	Ly6a	FALSE	FALSE	FALSE	TRUE	.	0	0	.	0	0	.	.	chr15	74997334	74998335
chr15	74997427	74998428	-1	ENSMUSG00000075602	ENSMUST00000186526	Ly6a	FALSE	FALSE	FALSE	TRUE	.	0	0	.	0	0	.	.	chr15	74997427	74998428
chr15	75048302	75049303	-1	ENSMUSG00000079018	ENSMUST00000188845	Ly6c1	FALSE	FALSE	FALSE	TRUE	.	0	0	.	0	0	.	.	chr15	75048302	75049303
chr15	75048303	75049304	-1	ENSMUSG00000079018	ENSMUST00000185200	Ly6c1	FALSE	FALSE	FALSE	TRUE	.	0	0	.	0	0	.	.	chr15	75048303	75049304
chr15	75048312	75049313	-1	ENSMUSG00000079018	ENSMUST00000191216	Ly6c1	FALSE	FALSE	FALSE	TRUE	.	0	0	.	0	0	.	.	chr15	75048312	75049313
chr15	75048312	75049313	-1	ENSMUSG00000079018	ENSMUST00000179762	Ly6c1	FALSE	FALSE	FALSE	TRUE	.	0	0	.	0	0	.	.	chr15	75048312	75049313
chr15	75048168	75049169	-1	ENSMUSG00000079018	ENSMUST00000185372	Ly6c1	FALSE	FALSE	FALSE	TRUE	.	0	0	.	0	0	.	.	chr15	75048168	75049169
chr15	75048329	75049330	-1	ENSMUSG00000079018	ENSMUST00000065408	Ly6c1	FALSE	FALSE	FALSE	TRUE	.	0	0	.	0	0	.	.	chr15	75048329	75049330
chr15	75048287	75049288	-1	ENSMUSG00000079018	ENSMUST00000187347	Ly6c1	FALSE	FALSE	FALSE	TRUE	.	0	0	.	0	0	.	.	chr15	75048287	75049288
chr15	74672069	74673070	-1	ENSMUSG00000022602	ENSMUST00000110009	Arc	FALSE	FALSE	FALSE	TRUE	.	0	0	.	0	0	.	.	chr15	74672069	74673070
chr15	74672067	74673068	-1	ENSMUSG00000022602	ENSMUST00000023268	Arc	FALSE	FALSE	FALSE	TRUE	.	0	0	.	0	0	.	.	chr15	74672067	74673068
chr16	97534808	97535809	1	ENSMUSG00000023341	ENSMUST00000190447	Mx2	FALSE	TRUE	FALSE	FALSE	.	0	0	chr16	97534911	97535351	element_153	1	chr16	97534808	97535809
chr16	97534808	97535809	1	ENSMUSG00000023341	ENSMUST00000190447	Mx2	FALSE	TRUE	FALSE	FALSE	.	0	0	chr16	97535744	97536116	element_154	1	chr16	97534808	97535809
chr16	97549887	97550888	1	ENSMUSG00000023341	ENSMUST00000190097	Mx2	FALSE	FALSE	FALSE	TRUE	.	0	0	.	0	0	.	.	chr16	97549887	97550888
chr16	97535583	97536584	1	ENSMUSG00000023341	ENSMUST00000024112	Mx2	FALSE	TRUE	FALSE	FALSE	.	0	0	chr16	97535744	97536116	element_153	1	chr16	97535583	97536584
chr16	97557912	97558913	1	ENSMUSG00000023341	ENSMUST00000191103	Mx2	FALSE	FALSE	FALSE	TRUE	.	0	0	.	0	0	.	.	chr16	97557912	97558913
chr16	97535581	97536582	1	ENSMUSG00000023341	ENSMUST00000188251	Mx2	FALSE	TRUE	FALSE	FALSE	.	0	0	chr16	97535744	97536116	element_153	1	chr16	97535581	97536582
chr16	77013206	77014207	1	ENSMUSG00000022867	ENSMUST00000023580	Usp25	FALSE	FALSE	FALSE	TRUE	.	0	0	.	0	0	.	.	chr16	77013206	77014207
chr16	77083400	77084401	1	ENSMUSG00000022867	ENSMUST00000232351	Usp25	FALSE	FALSE	FALSE	TRUE	.	0	0	.	0	0	.	.	chr16	77083400	77084401
chr16	77013287	77014288	1	ENSMUSG00000022867	ENSMUST00000232047	Usp25	FALSE	FALSE	FALSE	TRUE	.	0	0	.	0	0	.	.	chr16	77013287	77014288
chr16	77081002	77082003	1	ENSMUSG00000022867	ENSMUST00000232538	Usp25	FALSE	FALSE	FALSE	TRUE	.	0	0	.	0	0	.	.	chr16	77081002	77082003
chr16	97996834	97997835	1	ENSMUSG00000080717	ENSMUST00000232308	B230307C23Rik	FALSE	FALSE	FALSE	TRUE	.	0	0	.	0	0	.	.	chr16	97996834	97997835
chr16	98008129	98009130	1	ENSMUSG00000080717	ENSMUST00000113729	B230307C23Rik	FALSE	FALSE	FALSE	TRUE	.	0	0	.	0	0	.	.	chr16	98008129	98009130
chr16	97996827	97997828	1	ENSMUSG00000080717	ENSMUST00000232387	B230307C23Rik	FALSE	FALSE	FALSE	TRUE	.	0	0	.	0	0	.	.	chr16	97996827	97997828
chr16	97996815	97997816	1	ENSMUSG00000080717	ENSMUST00000231936	B230307C23Rik	FALSE	FALSE	FALSE	TRUE	.	0	0	.	0	0	.	.	chr16	97996815	97997816
chr16	97996824	97997825	1	ENSMUSG00000080717	ENSMUST00000232278	B230307C23Rik	FALSE	FALSE	FALSE	TRUE	.	0	0	.	0	0	.	.	chr16	97996824	97997825
chr16	97996864	97997865	1	ENSMUSG00000080717	ENSMUST00000231913	B230307C23Rik	FALSE	FALSE	FALSE	TRUE	.	0	0	.	0	0	.	.	chr16	97996864	97997865
chr16	97996847	97997848	1	ENSMUSG00000080717	ENSMUST00000183578	B230307C23Rik	FALSE	FALSE	FALSE	TRUE	.	0	0	.	0	0	.	.	chr16	97996847	97997848
chr16	97996823	97997824	1	ENSMUSG00000080717	ENSMUST00000122450	B230307C23Rik	FALSE	FALSE	FALSE	TRUE	.	0	0	.	0	0	.	.	chr16	97996823	97997824
chr16	19760087	19761088	1	ENSMUSG00000022686	ENSMUST00000155780	B3gnt5	FALSE	FALSE	FALSE	TRUE	.	0	0	.	0	0	.	.	chr16	19760087	19761088
chr16	19759899	19760900	1	ENSMUSG00000022686	ENSMUST00000152845	B3gnt5	FALSE	FALSE	FALSE	TRUE	.	0	0	.	0	0	.	.	chr16	19759899	19760900
chr16	19760086	19761087	1	ENSMUSG00000022686	ENSMUST00000131557	B3gnt5	FALSE	FALSE	FALSE	TRUE	.	0	0	.	0	0	.	.	chr16	19760086	19761087
chr16	19759734	19760735	1	ENSMUSG00000022686	ENSMUST00000079780	B3gnt5	FALSE	FALSE	FALSE	TRUE	.	0	0	.	0	0	.	.	chr16	19759734	19760735
chr16	19759734	19760735	1	ENSMUSG00000022686	ENSMUST00000164397	B3gnt5	FALSE	FALSE	FALSE	TRUE	.	0	0	.	0	0	.	.	chr16	19759734	19760735
chr16	19760554	19761555	1	ENSMUSG00000022686	ENSMUST00000119468	B3gnt5	FALSE	FALSE	FALSE	TRUE	.	0	0	.	0	0	.	.	chr16	19760554	19761555
chr16	19759708	19760709	1	ENSMUSG00000022686	ENSMUST00000121344	B3gnt5	FALSE	FALSE	FALSE	TRUE	.	0	0	.	0	0	.	.	chr16	19759708	19760709
chr16	35940533	35941534	1	ENSMUSG00000022906	ENSMUST00000153066	Parp9	FALSE	FALSE	FALSE	TRUE	.	0	0	.	0	0	.	.	chr16	35940533	35941534
chr16	35938511	35939512	1	ENSMUSG00000022906	ENSMUST00000023622	Parp9	FALSE	TRUE	FALSE	FALSE	.	0	0	chr16	35938611	35939225	element_145	4	chr16	35938511	35939512
chr16	35938530	35939531	1	ENSMUSG00000022906	ENSMUST00000128878	Parp9	FALSE	TRUE	FALSE	FALSE	.	0	0	chr16	35938611	35939225	element_145	4	chr16	35938530	35939531
chr16	35937970	35938971	1	ENSMUSG00000022906	ENSMUST00000114878	Parp9	FALSE	TRUE	FALSE	FALSE	.	0	0	chr16	35938611	35939225	element_145	4	chr16	35937970	35938971
chr16	35938512	35939513	1	ENSMUSG00000022906	ENSMUST00000114877	Parp9	FALSE	TRUE	FALSE	FALSE	.	0	0	chr16	35938611	35939225	element_145	4	chr16	35938512	35939513
chr16	35947784	35948785	1	ENSMUSG00000022906	ENSMUST00000159160	Parp9	FALSE	FALSE	FALSE	TRUE	.	0	0	.	0	0	.	.	chr16	35947784	35948785
chr16	35938561	35939562	1	ENSMUSG00000022906	ENSMUST00000122870	Parp9	FALSE	TRUE	FALSE	FALSE	.	0	0	chr16	35938611	35939225	element_145	4	chr16	35938561	35939562
chr16	31235622	31236623	1	ENSMUSG00000116946	ENSMUST00000232234	AC130815.3	FALSE	FALSE	FALSE	TRUE	.	0	0	.	0	0	.	.	chr16	31235622	31236623
chr16	31233090	31234091	1	ENSMUSG00000116946	ENSMUST00000232655	AC130815.3	FALSE	FALSE	FALSE	TRUE	.	0	0	.	0	0	.	.	chr16	31233090	31234091
chr16	15886786	15887787	1	ENSMUSG00000071637	ENSMUST00000096232	Cebpd	FALSE	FALSE	FALSE	TRUE	.	0	0	.	0	0	.	.	chr16	15886786	15887787
chr16	15887916	15888917	1	ENSMUSG00000071637	ENSMUST00000210772	Cebpd	FALSE	FALSE	FALSE	TRUE	.	0	0	.	0	0	.	.	chr16	15887916	15888917
chr16	18127142	18128143	1	ENSMUSG00000043811	ENSMUST00000059589	Rtn4r	FALSE	FALSE	FALSE	TRUE	.	0	0	.	0	0	.	.	chr16	18127142	18128143
chr16	49855145	49856146	1	ENSMUSG00000055447	ENSMUST00000229206	Cd47	FALSE	FALSE	FALSE	TRUE	.	0	0	.	0	0	.	.	chr16	49855145	49856146
chr16	49866333	49867334	1	ENSMUSG00000055447	ENSMUST00000229104	Cd47	FALSE	FALSE	FALSE	TRUE	.	0	0	.	0	0	.	.	chr16	49866333	49867334
chr16	49855156	49856157	1	ENSMUSG00000055447	ENSMUST00000230281	Cd47	FALSE	FALSE	FALSE	TRUE	.	0	0	.	0	0	.	.	chr16	49855156	49856157
chr16	49855145	49856146	1	ENSMUSG00000055447	ENSMUST00000230836	Cd47	FALSE	FALSE	FALSE	TRUE	.	0	0	.	0	0	.	.	chr16	49855145	49856146
chr16	49854866	49855867	1	ENSMUSG00000055447	ENSMUST00000114496	Cd47	FALSE	FALSE	FALSE	TRUE	.	0	0	.	0	0	.	.	chr16	49854866	49855867
chr16	49855287	49856288	1	ENSMUSG00000055447	ENSMUST00000230641	Cd47	FALSE	FALSE	FALSE	TRUE	.	0	0	.	0	0	.	.	chr16	49855287	49856288
chr16	49855145	49856146	1	ENSMUSG00000055447	ENSMUST00000084838	Cd47	FALSE	FALSE	FALSE	TRUE	.	0	0	.	0	0	.	.	chr16	49855145	49856146
chr16	49855145	49856146	1	ENSMUSG00000055447	ENSMUST00000231187	Cd47	FALSE	FALSE	FALSE	TRUE	.	0	0	.	0	0	.	.	chr16	49855145	49856146
chr16	49855133	49856134	1	ENSMUSG00000055447	ENSMUST00000229101	Cd47	FALSE	FALSE	FALSE	TRUE	.	0	0	.	0	0	.	.	chr16	49855133	49856134
chr16	49800033	49801034	1	ENSMUSG00000055447	ENSMUST00000229640	Cd47	FALSE	FALSE	FALSE	TRUE	.	0	0	.	0	0	.	.	chr16	49800033	49801034
chr16	23608557	23609558	1	ENSMUSG00000033355	ENSMUST00000210901	Rtp4	FALSE	FALSE	FALSE	TRUE	.	0	0	.	0	0	.	.	chr16	23608557	23609558
chr16	23609419	23610420	1	ENSMUSG00000033355	ENSMUST00000038423	Rtp4	FALSE	TRUE	FALSE	FALSE	.	0	0	chr16	23609641	23610130	element_140	1	chr16	23609419	23610420
chr16	23519791	23520792	1	ENSMUSG00000033355	ENSMUST00000209422	Rtp4	FALSE	FALSE	FALSE	TRUE	.	0	0	.	0	0	.	.	chr16	23519791	23520792
chr16	23601242	23602243	1	ENSMUSG00000033355	ENSMUST00000211569	Rtp4	FALSE	FALSE	FALSE	TRUE	.	0	0	.	0	0	.	.	chr16	23601242	23602243
chr16	23609425	23610426	1	ENSMUSG00000033355	ENSMUST00000211349	Rtp4	FALSE	TRUE	FALSE	FALSE	.	0	0	chr16	23609641	23610130	element_140	1	chr16	23609425	23610426
chr16	97460271	97461272	-1	ENSMUSG00000000386	ENSMUST00000232193	Mx1	FALSE	FALSE	FALSE	TRUE	.	0	0	.	0	0	.	.	chr16	97460271	97461272
chr16	97462406	97463407	-1	ENSMUSG00000000386	ENSMUST00000135184	Mx1	FALSE	TRUE	FALSE	FALSE	.	0	0	chr16	97462842	97463164	element_152	2	chr16	97462406	97463407
chr16	97460357	97461358	-1	ENSMUSG00000000386	ENSMUST00000231455	Mx1	FALSE	FALSE	FALSE	TRUE	.	0	0	.	0	0	.	.	chr16	97460357	97461358
chr16	97462405	97463406	-1	ENSMUSG00000000386	ENSMUST00000113768	Mx1	FALSE	TRUE	FALSE	FALSE	.	0	0	chr16	97462842	97463164	element_152	2	chr16	97462405	97463406
chr16	97452376	97453377	-1	ENSMUSG00000000386	ENSMUST00000231995	Mx1	FALSE	FALSE	FALSE	TRUE	.	0	0	.	0	0	.	.	chr16	97452376	97453377
chr16	97462404	97463405	-1	ENSMUSG00000000386	ENSMUST00000142883	Mx1	FALSE	TRUE	FALSE	FALSE	.	0	0	chr16	97462842	97463164	element_152	2	chr16	97462404	97463405
chr16	97460271	97461272	-1	ENSMUSG00000000386	ENSMUST00000232282	Mx1	FALSE	FALSE	FALSE	TRUE	.	0	0	.	0	0	.	.	chr16	97460271	97461272
chr16	97462388	97463389	-1	ENSMUSG00000000386	ENSMUST00000231461	Mx1	FALSE	TRUE	FALSE	FALSE	.	0	0	chr16	97462842	97463164	element_152	2	chr16	97462388	97463389
chr16	97462404	97463405	-1	ENSMUSG00000000386	ENSMUST00000155233	Mx1	FALSE	TRUE	FALSE	FALSE	.	0	0	chr16	97462842	97463164	element_152	2	chr16	97462404	97463405
chr16	97462405	97463406	-1	ENSMUSG00000000386	ENSMUST00000023655	Mx1	FALSE	TRUE	FALSE	FALSE	.	0	0	chr16	97462842	97463164	element_152	2	chr16	97462405	97463406
chr16	35867450	35868451	-1	ENSMUSG00000116639	ENSMUST00000231830	AC129574.2	FALSE	FALSE	FALSE	TRUE	.	0	0	.	0	0	.	.	chr16	35867450	35868451
chr16	35871043	35872044	-1	ENSMUSG00000034422	ENSMUST00000042665	Parp14	FALSE	TRUE	FALSE	FALSE	.	0	0	chr16	35871191	35871749	element_143	1	chr16	35871043	35872044
chr16	35870881	35871882	-1	ENSMUSG00000034422	ENSMUST00000135669	Parp14	FALSE	TRUE	FALSE	FALSE	.	0	0	chr16	35871191	35871749	element_143	1	chr16	35870881	35871882
chr16	35870881	35871882	-1	ENSMUSG00000034422	ENSMUST00000142946	Parp14	FALSE	TRUE	FALSE	FALSE	.	0	0	chr16	35871191	35871749	element_143	1	chr16	35870881	35871882
chr16	35938650	35939651	-1	ENSMUSG00000049502	ENSMUST00000114885	Dtx3l	FALSE	TRUE	FALSE	FALSE	.	0	0	chr16	35938611	35939225	element_145	4	chr16	35938650	35939651
chr16	35938650	35939651	-1	ENSMUSG00000049502	ENSMUST00000081933	Dtx3l	FALSE	TRUE	FALSE	FALSE	.	0	0	chr16	35938611	35939225	element_145	4	chr16	35938650	35939651
chr16	10785035	10786036	-1	ENSMUSG00000038037	ENSMUST00000229866	Socs1	FALSE	TRUE	FALSE	FALSE	.	0	0	chr16	10785400	10785770	element_136	4	chr16	10785035	10786036
chr16	10785035	10786036	-1	ENSMUSG00000038037	ENSMUST00000038099	Socs1	FALSE	TRUE	FALSE	FALSE	.	0	0	chr16	10785400	10785770	element_136	4	chr16	10785035	10786036
chr16	31291395	31292396	-1	ENSMUSG00000116617	ENSMUST00000232175	AC130815.2	FALSE	FALSE	FALSE	TRUE	.	0	0	.	0	0	.	.	chr16	31291395	31292396
chr16	31310847	31311848	-1	ENSMUSG00000022548	ENSMUST00000145837	Apod	FALSE	FALSE	FALSE	TRUE	.	0	0	.	0	0	.	.	chr16	31310847	31311848
chr16	31302944	31303945	-1	ENSMUSG00000022548	ENSMUST00000156456	Apod	FALSE	FALSE	FALSE	TRUE	.	0	0	.	0	0	.	.	chr16	31302944	31303945
chr16	31314093	31315094	-1	ENSMUSG00000022548	ENSMUST00000023207	Apod	FALSE	TRUE	FALSE	FALSE	.	0	0	chr16	31314825	31315341	element_141	3	chr16	31314093	31315094
chr16	31314303	31315304	-1	ENSMUSG00000022548	ENSMUST00000115230	Apod	FALSE	TRUE	FALSE	FALSE	.	0	0	chr16	31314825	31315341	element_141	3	chr16	31314303	31315304
chr16	31314307	31315308	-1	ENSMUSG00000022548	ENSMUST00000130560	Apod	FALSE	TRUE	FALSE	FALSE	.	0	0	chr16	31314825	31315341	element_141	3	chr16	31314307	31315308
chr16	31303177	31304178	-1	ENSMUSG00000022548	ENSMUST00000155682	Apod	FALSE	FALSE	FALSE	TRUE	.	0	0	.	0	0	.	.	chr16	31303177	31304178
chr16	38432644	38433645	-1	ENSMUSG00000002847	ENSMUST00000002926	Pla1a	FALSE	FALSE	FALSE	TRUE	.	0	0	.	0	0	.	.	chr16	38432644	38433645
chr16	38417293	38418294	-1	ENSMUSG00000002847	ENSMUST00000232224	Pla1a	FALSE	FALSE	FALSE	TRUE	.	0	0	.	0	0	.	.	chr16	38417293	38418294
chr17	34197221	34198222	1	ENSMUSG00000024338	ENSMUST00000173441	Psmb8	FALSE	TRUE	FALSE	FALSE	.	0	0	chr17	34198176	34198542	element_167	1	chr17	34197221	34198222
chr17	34197290	34198291	1	ENSMUSG00000024338	ENSMUST00000025196	Psmb8	FALSE	TRUE	FALSE	FALSE	.	0	0	chr17	34198176	34198542	element_167	1	chr17	34197290	34198291
chr17	34198109	34199110	1	ENSMUSG00000024338	ENSMUST00000172960	Psmb8	FALSE	TRUE	FALSE	FALSE	.	0	0	chr17	34198176	34198542	element_167	1	chr17	34198109	34199110
chr17	34203580	34204581	1	ENSMUSG00000024339	ENSMUST00000138491	Tap2	FALSE	FALSE	FALSE	TRUE	.	0	0	.	0	0	.	.	chr17	34203580	34204581
chr17	34204600	34205601	1	ENSMUSG00000024339	ENSMUST00000131105	Tap2	FALSE	FALSE	FALSE	TRUE	.	0	0	.	0	0	.	.	chr17	34204600	34205601
chr17	34203027	34204028	1	ENSMUSG00000024339	ENSMUST00000025197	Tap2	FALSE	FALSE	FALSE	TRUE	.	0	0	.	0	0	.	.	chr17	34203027	34204028
chr17	34207206	34208207	1	ENSMUSG00000024339	ENSMUST00000145528	Tap2	FALSE	FALSE	FALSE	TRUE	.	0	0	.	0	0	.	.	chr17	34207206	34208207
chr17	34204067	34205068	1	ENSMUSG00000024339	ENSMUST00000127543	Tap2	FALSE	FALSE	FALSE	TRUE	.	0	0	.	0	0	.	.	chr17	34204067	34205068
chr17	34187228	34188229	1	ENSMUSG00000037321	ENSMUST00000166287	Tap1	FALSE	TRUE	FALSE	FALSE	.	0	0	chr17	34187534	34187993	element_166	4	chr17	34187228	34188229
chr17	34187053	34188054	1	ENSMUSG00000037321	ENSMUST00000170086	Tap1	FALSE	TRUE	FALSE	FALSE	.	0	0	chr17	34187534	34187993	element_166	4	chr17	34187053	34188054
chr17	34187302	34188303	1	ENSMUSG00000037321	ENSMUST00000041633	Tap1	FALSE	TRUE	FALSE	FALSE	.	0	0	chr17	34187534	34187993	element_166	4	chr17	34187302	34188303
chr17	34189391	34190392	1	ENSMUSG00000037321	ENSMUST00000168351	Tap1	FALSE	FALSE	FALSE	TRUE	.	0	0	.	0	0	.	.	chr17	34189391	34190392
chr17	34187234	34188235	1	ENSMUSG00000037321	ENSMUST00000166853	Tap1	FALSE	TRUE	FALSE	FALSE	.	0	0	chr17	34187534	34187993	element_166	4	chr17	34187234	34188235
chr17	34192554	34193555	1	ENSMUSG00000037321	ENSMUST00000166582	Tap1	FALSE	FALSE	FALSE	TRUE	.	0	0	.	0	0	.	.	chr17	34192554	34193555
chr17	34190252	34191253	1	ENSMUSG00000037321	ENSMUST00000171148	Tap1	FALSE	FALSE	FALSE	TRUE	.	0	0	.	0	0	.	.	chr17	34190252	34191253
chr17	53658811	53659812	1	ENSMUSG00000000708	ENSMUST00000172160	Kat2b	FALSE	FALSE	FALSE	TRUE	.	0	0	.	0	0	.	.	chr17	53658811	53659812
chr17	53566471	53567472	1	ENSMUSG00000000708	ENSMUST00000000724	Kat2b	FALSE	FALSE	FALSE	TRUE	.	0	0	.	0	0	.	.	chr17	53566471	53567472
chr17	53644197	53645198	1	ENSMUSG00000000708	ENSMUST00000166525	Kat2b	FALSE	FALSE	FALSE	TRUE	.	0	0	.	0	0	.	.	chr17	53644197	53645198
chr17	53583626	53584627	1	ENSMUSG00000000708	ENSMUST00000164390	Kat2b	FALSE	FALSE	FALSE	TRUE	.	0	0	.	0	0	.	.	chr17	53583626	53584627
chr17	53658738	53659739	1	ENSMUSG00000000708	ENSMUST00000167092	Kat2b	FALSE	FALSE	FALSE	TRUE	.	0	0	.	0	0	.	.	chr17	53658738	53659739
chr17	53658895	53659896	1	ENSMUSG00000000708	ENSMUST00000171072	Kat2b	FALSE	FALSE	FALSE	TRUE	.	0	0	.	0	0	.	.	chr17	53658895	53659896
chr17	53566361	53567362	1	ENSMUSG00000000708	ENSMUST00000163648	Kat2b	FALSE	FALSE	FALSE	TRUE	.	0	0	.	0	0	.	.	chr17	53566361	53567362
chr17	35264977	35265978	1	ENSMUSG00000073411	ENSMUST00000174325	H2-D1	FALSE	FALSE	FALSE	TRUE	.	0	0	.	0	0	.	.	chr17	35264977	35265978
chr17	35265521	35266522	1	ENSMUSG00000073411	ENSMUST00000173167	H2-D1	FALSE	FALSE	FALSE	TRUE	.	0	0	.	0	0	.	.	chr17	35265521	35266522
chr17	35262230	35263231	1	ENSMUSG00000073411	ENSMUST00000172785	H2-D1	FALSE	FALSE	FALSE	TRUE	.	0	0	.	0	0	.	.	chr17	35262230	35263231
chr17	35265521	35266522	1	ENSMUSG00000073411	ENSMUST00000172503	H2-D1	FALSE	FALSE	FALSE	TRUE	.	0	0	.	0	0	.	.	chr17	35265521	35266522
chr17	35379117	35380118	1	ENSMUSG00000035929	ENSMUST00000081435	H2-Q4	FALSE	FALSE	FALSE	TRUE	.	0	0	.	0	0	.	.	chr17	35379117	35380118
chr17	35379117	35380118	1	ENSMUSG00000035929	ENSMUST00000173975	H2-Q4	FALSE	FALSE	FALSE	TRUE	.	0	0	.	0	0	.	.	chr17	35379117	35380118
chr17	33909101	33910102	1	ENSMUSG00000002307	ENSMUST00000170075	Daxx	FALSE	TRUE	FALSE	FALSE	.	0	0	chr17	33909960	33910355	element_163	1	chr17	33909101	33910102
chr17	33909777	33910778	1	ENSMUSG00000002307	ENSMUST00000172859	Daxx	FALSE	TRUE	FALSE	FALSE	.	0	0	chr17	33909960	33910355	element_163	1	chr17	33909777	33910778
chr17	33913059	33914060	1	ENSMUSG00000002307	ENSMUST00000173279	Daxx	FALSE	FALSE	FALSE	TRUE	.	0	0	.	0	0	.	.	chr17	33913059	33914060
chr17	33909926	33910927	1	ENSMUSG00000002307	ENSMUST00000174146	Daxx	FALSE	TRUE	FALSE	FALSE	.	0	0	chr17	33909960	33910355	element_163	1	chr17	33909926	33910927
chr17	33908998	33909999	1	ENSMUSG00000002307	ENSMUST00000173626	Daxx	FALSE	TRUE	FALSE	FALSE	.	0	0	chr17	33909960	33910355	element_163	1	chr17	33908998	33909999
chr17	33908914	33909915	1	ENSMUSG00000002307	ENSMUST00000173028	Daxx	FALSE	FALSE	FALSE	TRUE	.	0	0	.	0	0	.	.	chr17	33908914	33909915
chr17	33912250	33913251	1	ENSMUSG00000002307	ENSMUST00000174646	Daxx	FALSE	FALSE	FALSE	TRUE	.	0	0	.	0	0	.	.	chr17	33912250	33913251
chr17	33909015	33910016	1	ENSMUSG00000002307	ENSMUST00000174541	Daxx	FALSE	TRUE	FALSE	FALSE	.	0	0	chr17	33909960	33910355	element_163	1	chr17	33909015	33910016
chr17	33908945	33909946	1	ENSMUSG00000002307	ENSMUST00000079421	Daxx	FALSE	FALSE	FALSE	TRUE	.	0	0	.	0	0	.	.	chr17	33908945	33909946
chr17	33925618	33926619	1	ENSMUSG00000024308	ENSMUST00000172653	Tapbp	FALSE	FALSE	FALSE	TRUE	.	0	0	.	0	0	.	.	chr17	33925618	33926619
chr17	33918832	33919833	1	ENSMUSG00000024308	ENSMUST00000025161	Tapbp	FALSE	FALSE	FALSE	TRUE	.	0	0	.	0	0	.	.	chr17	33918832	33919833
chr17	33915399	33916400	1	ENSMUSG00000024308	ENSMUST00000172619	Tapbp	FALSE	FALSE	FALSE	TRUE	.	0	0	.	0	0	.	.	chr17	33915399	33916400
chr17	33919012	33920013	1	ENSMUSG00000024308	ENSMUST00000172888	Tapbp	FALSE	FALSE	FALSE	TRUE	.	0	0	.	0	0	.	.	chr17	33919012	33920013
chr17	33920028	33921029	1	ENSMUSG00000024308	ENSMUST00000172489	Tapbp	FALSE	FALSE	FALSE	TRUE	.	0	0	.	0	0	.	.	chr17	33920028	33921029
chr17	37269720	37270721	1	ENSMUSG00000016206	ENSMUST00000038580	H2-M3	FALSE	FALSE	FALSE	TRUE	.	0	0	.	0	0	.	.	chr17	37269720	37270721
chr17	23748837	23749838	1	ENSMUSG00000097006	ENSMUST00000180547	9530082P21Rik	FALSE	FALSE	FALSE	TRUE	.	0	0	.	0	0	.	.	chr17	23748837	23749838
chr17	23742734	23743735	1	ENSMUSG00000097006	ENSMUST00000181291	9530082P21Rik	FALSE	FALSE	FALSE	TRUE	.	0	0	.	0	0	.	.	chr17	23742734	23743735
chr17	23748736	23749737	1	ENSMUSG00000097006	ENSMUST00000181605	9530082P21Rik	FALSE	FALSE	FALSE	TRUE	.	0	0	.	0	0	.	.	chr17	23748736	23749737
chr17	36836673	36837674	1	ENSMUSG00000024457	ENSMUST00000130801	Trim26	FALSE	FALSE	FALSE	TRUE	.	0	0	.	0	0	.	.	chr17	36836673	36837674
chr17	36836641	36837642	1	ENSMUSG00000024457	ENSMUST00000134325	Trim26	FALSE	FALSE	FALSE	TRUE	.	0	0	.	0	0	.	.	chr17	36836641	36837642
chr17	36836684	36837685	1	ENSMUSG00000024457	ENSMUST00000123715	Trim26	FALSE	FALSE	FALSE	TRUE	.	0	0	.	0	0	.	.	chr17	36836684	36837685
chr17	36836634	36837635	1	ENSMUSG00000024457	ENSMUST00000124307	Trim26	FALSE	FALSE	FALSE	TRUE	.	0	0	.	0	0	.	.	chr17	36836634	36837635
chr17	36836641	36837642	1	ENSMUSG00000024457	ENSMUST00000179968	Trim26	FALSE	FALSE	FALSE	TRUE	.	0	0	.	0	0	.	.	chr17	36836641	36837642
chr17	36836684	36837685	1	ENSMUSG00000024457	ENSMUST00000144182	Trim26	FALSE	FALSE	FALSE	TRUE	.	0	0	.	0	0	.	.	chr17	36836684	36837685
chr17	36852002	36853003	1	ENSMUSG00000024457	ENSMUST00000124136	Trim26	FALSE	FALSE	FALSE	TRUE	.	0	0	.	0	0	.	.	chr17	36852002	36853003
chr17	36836646	36837647	1	ENSMUSG00000024457	ENSMUST00000053434	Trim26	FALSE	FALSE	FALSE	TRUE	.	0	0	.	0	0	.	.	chr17	36836646	36837647
chr17	36836643	36837644	1	ENSMUSG00000024457	ENSMUST00000130367	Trim26	FALSE	FALSE	FALSE	TRUE	.	0	0	.	0	0	.	.	chr17	36836643	36837644
chr17	36854134	36855135	1	ENSMUSG00000024457	ENSMUST00000156872	Trim26	FALSE	FALSE	FALSE	TRUE	.	0	0	.	0	0	.	.	chr17	36854134	36855135
chr17	35821184	35822185	1	ENSMUSG00000003541	ENSMUST00000003635	Ier3	FALSE	FALSE	FALSE	TRUE	.	0	0	.	0	0	.	.	chr17	35821184	35822185
chr17	73949681	73950682	-1	ENSMUSG00000024066	ENSMUST00000024866	Xdh	FALSE	FALSE	FALSE	TRUE	.	0	0	.	0	0	.	.	chr17	73949681	73950682
chr17	34183048	34184049	-1	ENSMUSG00000096727	ENSMUST00000178857	Psmb9	FALSE	FALSE	FALSE	TRUE	.	0	0	.	0	0	.	.	chr17	34183048	34184049
chr17	34186852	34187853	-1	ENSMUSG00000096727	ENSMUST00000114230	Psmb9	FALSE	TRUE	FALSE	FALSE	.	0	0	chr17	34187534	34187993	element_166	4	chr17	34186852	34187853
chr17	34183230	34184231	-1	ENSMUSG00000096727	ENSMUST00000171321	Psmb9	FALSE	FALSE	FALSE	TRUE	.	0	0	.	0	0	.	.	chr17	34183230	34184231
chr17	34186837	34187838	-1	ENSMUSG00000096727	ENSMUST00000179593	Psmb9	FALSE	TRUE	FALSE	FALSE	.	0	0	chr17	34187534	34187993	element_166	4	chr17	34186837	34187838
chr17	34186718	34187719	-1	ENSMUSG00000096727	ENSMUST00000173831	Psmb9	FALSE	TRUE	FALSE	FALSE	.	0	0	chr17	34187534	34187993	element_166	4	chr17	34186718	34187719
chr17	34187263	34188264	-1	ENSMUSG00000096727	ENSMUST00000174576	Psmb9	FALSE	TRUE	FALSE	FALSE	.	0	0	chr17	34187534	34187993	element_166	4	chr17	34187263	34188264
chr17	33996656	33997657	-1	ENSMUSG00000061232	ENSMUST00000173543	H2-K1	FALSE	FALSE	FALSE	TRUE	.	0	0	.	0	0	.	.	chr17	33996656	33997657
chr17	33997280	33998281	-1	ENSMUSG00000061232	ENSMUST00000173317	H2-K1	FALSE	FALSE	FALSE	TRUE	.	0	0	.	0	0	.	.	chr17	33997280	33998281
chr17	33999788	34000789	-1	ENSMUSG00000061232	ENSMUST00000172912	H2-K1	FALSE	FALSE	FALSE	TRUE	.	0	0	.	0	0	.	.	chr17	33999788	34000789
chr17	33999782	34000783	-1	ENSMUSG00000061232	ENSMUST00000114311	H2-K1	FALSE	FALSE	FALSE	TRUE	.	0	0	.	0	0	.	.	chr17	33999782	34000783
chr17	33999756	34000757	-1	ENSMUSG00000061232	ENSMUST00000087189	H2-K1	FALSE	FALSE	FALSE	TRUE	.	0	0	.	0	0	.	.	chr17	33999756	34000757
chr17	33999832	34000833	-1	ENSMUSG00000061232	ENSMUST00000025181	H2-K1	FALSE	FALSE	FALSE	TRUE	.	0	0	.	0	0	.	.	chr17	33999832	34000833
chr17	33998973	33999974	-1	ENSMUSG00000061232	ENSMUST00000172782	H2-K1	FALSE	FALSE	FALSE	TRUE	.	0	0	.	0	0	.	.	chr17	33998973	33999974
chr17	33997254	33998255	-1	ENSMUSG00000061232	ENSMUST00000173602	H2-K1	FALSE	FALSE	FALSE	TRUE	.	0	0	.	0	0	.	.	chr17	33997254	33998255
chr17	33999759	34000760	-1	ENSMUSG00000061232	ENSMUST00000173075	H2-K1	FALSE	FALSE	FALSE	TRUE	.	0	0	.	0	0	.	.	chr17	33999759	34000760
chr17	78851455	78852456	-1	ENSMUSG00000091549	ENSMUST00000167498	Gm6548	FALSE	FALSE	FALSE	TRUE	.	0	0	.	0	0	.	.	chr17	78851455	78852456
chr17	78882053	78883054	-1	ENSMUSG00000024079	ENSMUST00000171451	Eif2ak2	FALSE	TRUE	FALSE	FALSE	.	0	0	chr17	78882399	78882733	element_179	1	chr17	78882053	78883054
chr17	78882047	78883048	-1	ENSMUSG00000024079	ENSMUST00000171852	Eif2ak2	FALSE	TRUE	FALSE	FALSE	.	0	0	chr17	78882399	78882733	element_179	1	chr17	78882047	78883048
chr17	78882072	78883073	-1	ENSMUSG00000024079	ENSMUST00000024884	Eif2ak2	FALSE	TRUE	FALSE	FALSE	.	0	0	chr17	78882399	78882733	element_179	1	chr17	78882072	78883073
chr17	78858479	78859480	-1	ENSMUSG00000024079	ENSMUST00000169940	Eif2ak2	FALSE	FALSE	FALSE	TRUE	.	0	0	.	0	0	.	.	chr17	78858479	78859480
chr17	35379791	35380792	-1	ENSMUSG00000079505	ENSMUST00000113886	Gm11131	FALSE	FALSE	FALSE	TRUE	.	0	0	.	0	0	.	.	chr17	35379791	35380792
chr17	15367889	15368890	-1	ENSMUSG00000014773	ENSMUST00000140784	Dll1	FALSE	FALSE	FALSE	TRUE	.	0	0	.	0	0	.	.	chr17	15367889	15368890
chr17	15376371	15377372	-1	ENSMUSG00000014773	ENSMUST00000143460	Dll1	FALSE	FALSE	FALSE	TRUE	.	0	0	.	0	0	.	.	chr17	15376371	15377372
chr17	15373571	15374572	-1	ENSMUSG00000014773	ENSMUST00000129395	Dll1	FALSE	FALSE	FALSE	TRUE	.	0	0	.	0	0	.	.	chr17	15373571	15374572
chr17	15375475	15376476	-1	ENSMUSG00000014773	ENSMUST00000014917	Dll1	FALSE	FALSE	FALSE	TRUE	.	0	0	.	0	0	.	.	chr17	15375475	15376476
chr17	15374599	15375600	-1	ENSMUSG00000014773	ENSMUST00000124196	Dll1	FALSE	FALSE	FALSE	TRUE	.	0	0	.	0	0	.	.	chr17	15374599	15375600
chr17	15371330	15372331	-1	ENSMUSG00000014773	ENSMUST00000152416	Dll1	FALSE	FALSE	FALSE	TRUE	.	0	0	.	0	0	.	.	chr17	15371330	15372331
chr17	33908708	33909709	-1	ENSMUSG00000092564	ENSMUST00000174467	BC051226	FALSE	FALSE	FALSE	TRUE	.	0	0	.	0	0	.	.	chr17	33908708	33909709
chr17	33908677	33909678	-1	ENSMUSG00000092564	ENSMUST00000172526	BC051226	FALSE	FALSE	FALSE	TRUE	.	0	0	.	0	0	.	.	chr17	33908677	33909678
chr17	33908816	33909817	-1	ENSMUSG00000092564	ENSMUST00000174321	BC051226	FALSE	FALSE	FALSE	TRUE	.	0	0	.	0	0	.	.	chr17	33908816	33909817
chr17	44105263	44106264	-1	ENSMUSG00000023961	ENSMUST00000143137	Enpp4	FALSE	FALSE	FALSE	TRUE	.	0	0	.	0	0	.	.	chr17	44105263	44106264
chr17	44105308	44106309	-1	ENSMUSG00000023961	ENSMUST00000024757	Enpp4	FALSE	FALSE	FALSE	TRUE	.	0	0	.	0	0	.	.	chr17	44105308	44106309
chr17	17854687	17855688	-1	ENSMUSG00000003665	ENSMUST00000003762	Has1	FALSE	FALSE	FALSE	TRUE	.	0	0	.	0	0	.	.	chr17	17854687	17855688
chr17	17854704	17855705	-1	ENSMUSG00000003665	ENSMUST00000232410	Has1	FALSE	FALSE	FALSE	TRUE	.	0	0	.	0	0	.	.	chr17	17854704	17855705
chr17	34897764	34898765	-1	ENSMUSG00000024371	ENSMUST00000174279	C2	FALSE	FALSE	FALSE	TRUE	.	0	0	.	0	0	.	.	chr17	34897764	34898765
chr17	34863911	34864912	-1	ENSMUSG00000024371	ENSMUST00000134300	C2	FALSE	FALSE	FALSE	TRUE	.	0	0	.	0	0	.	.	chr17	34863911	34864912
chr17	34895056	34896057	-1	ENSMUSG00000024371	ENSMUST00000174880	C2	FALSE	FALSE	FALSE	TRUE	.	0	0	.	0	0	.	.	chr17	34895056	34896057
chr17	34881525	34882526	-1	ENSMUSG00000024371	ENSMUST00000152417	C2	FALSE	FALSE	FALSE	TRUE	.	0	0	.	0	0	.	.	chr17	34881525	34882526
chr17	34881466	34882467	-1	ENSMUSG00000024371	ENSMUST00000130728	C2	FALSE	FALSE	FALSE	TRUE	.	0	0	.	0	0	.	.	chr17	34881466	34882467
chr17	34864451	34865452	-1	ENSMUSG00000024371	ENSMUST00000127795	C2	FALSE	FALSE	FALSE	TRUE	.	0	0	.	0	0	.	.	chr17	34864451	34865452
chr17	34895046	34896047	-1	ENSMUSG00000024371	ENSMUST00000148431	C2	FALSE	FALSE	FALSE	TRUE	.	0	0	.	0	0	.	.	chr17	34895046	34896047
chr17	34881599	34882600	-1	ENSMUSG00000024371	ENSMUST00000025230	C2	FALSE	FALSE	FALSE	TRUE	.	0	0	.	0	0	.	.	chr17	34881599	34882600
chr17	36020024	36021025	-1	ENSMUSG00000053835	ENSMUST00000174063	H2-T24	FALSE	TRUE	FALSE	FALSE	.	0	0	chr17	36020688	36021147	element_169	1	chr17	36020024	36021025
chr17	36020059	36021060	-1	ENSMUSG00000053835	ENSMUST00000113760	H2-T24	FALSE	TRUE	FALSE	FALSE	.	0	0	chr17	36020688	36021147	element_169	1	chr17	36020059	36021060
chr17	36032229	36033230	-1	ENSMUSG00000067212	ENSMUST00000174471	H2-T23	FALSE	FALSE	FALSE	TRUE	.	0	0	.	0	0	.	.	chr17	36032229	36033230
chr17	36032354	36033355	-1	ENSMUSG00000067212	ENSMUST00000102678	H2-T23	FALSE	FALSE	FALSE	TRUE	.	0	0	.	0	0	.	.	chr17	36032354	36033355
chr17	36032189	36033190	-1	ENSMUSG00000067212	ENSMUST00000174839	H2-T23	FALSE	FALSE	FALSE	TRUE	.	0	0	.	0	0	.	.	chr17	36032189	36033190
chr17	36032040	36033041	-1	ENSMUSG00000067212	ENSMUST00000174161	H2-T23	FALSE	FALSE	FALSE	TRUE	.	0	0	.	0	0	.	.	chr17	36032040	36033041
chr17	36042182	36043183	-1	ENSMUSG00000056116	ENSMUST00000173280	H2-T22	FALSE	FALSE	FALSE	TRUE	.	0	0	.	0	0	.	.	chr17	36042182	36043183
chr17	36042189	36043190	-1	ENSMUSG00000056116	ENSMUST00000058801	H2-T22	FALSE	FALSE	FALSE	TRUE	.	0	0	.	0	0	.	.	chr17	36042189	36043190
chr17	36042246	36043247	-1	ENSMUSG00000056116	ENSMUST00000077960	H2-T22	FALSE	FALSE	FALSE	TRUE	.	0	0	.	0	0	.	.	chr17	36042246	36043247
chr17	36041999	36043000	-1	ENSMUSG00000056116	ENSMUST00000172633	H2-T22	FALSE	FALSE	FALSE	TRUE	.	0	0	.	0	0	.	.	chr17	36041999	36043000
chr17	36042204	36043205	-1	ENSMUSG00000056116	ENSMUST00000080015	H2-T22	FALSE	FALSE	FALSE	TRUE	.	0	0	.	0	0	.	.	chr17	36042204	36043205
chr17	25380150	25381151	-1	ENSMUSG00000024112	ENSMUST00000161035	Cacna1h	FALSE	FALSE	FALSE	TRUE	.	0	0	.	0	0	.	.	chr17	25380150	25381151
chr17	25433282	25434283	-1	ENSMUSG00000024112	ENSMUST00000159052	Cacna1h	FALSE	FALSE	FALSE	TRUE	.	0	0	.	0	0	.	.	chr17	25433282	25434283
chr17	25388971	25389972	-1	ENSMUSG00000024112	ENSMUST00000162820	Cacna1h	FALSE	FALSE	FALSE	TRUE	.	0	0	.	0	0	.	.	chr17	25388971	25389972
chr17	25379778	25380779	-1	ENSMUSG00000024112	ENSMUST00000161658	Cacna1h	FALSE	FALSE	FALSE	TRUE	.	0	0	.	0	0	.	.	chr17	25379778	25380779
chr17	25433282	25434283	-1	ENSMUSG00000024112	ENSMUST00000159048	Cacna1h	FALSE	FALSE	FALSE	TRUE	.	0	0	.	0	0	.	.	chr17	25433282	25434283
chr17	25432777	25433778	-1	ENSMUSG00000024112	ENSMUST00000159623	Cacna1h	FALSE	FALSE	FALSE	TRUE	.	0	0	.	0	0	.	.	chr17	25432777	25433778
chr17	25378442	25379443	-1	ENSMUSG00000024112	ENSMUST00000159331	Cacna1h	FALSE	FALSE	FALSE	TRUE	.	0	0	.	0	0	.	.	chr17	25378442	25379443
chr17	25433267	25434268	-1	ENSMUSG00000024112	ENSMUST00000161454	Cacna1h	FALSE	FALSE	FALSE	TRUE	.	0	0	.	0	0	.	.	chr17	25433267	25434268
chr17	25433282	25434283	-1	ENSMUSG00000024112	ENSMUST00000159610	Cacna1h	FALSE	FALSE	FALSE	TRUE	.	0	0	.	0	0	.	.	chr17	25433282	25434283
chr17	25433282	25434283	-1	ENSMUSG00000024112	ENSMUST00000078496	Cacna1h	FALSE	FALSE	FALSE	TRUE	.	0	0	.	0	0	.	.	chr17	25433282	25434283
chr17	36120934	36121935	-1	ENSMUSG00000079491	ENSMUST00000174625	H2-T10	FALSE	FALSE	FALSE	TRUE	.	0	0	.	0	0	.	.	chr17	36120934	36121935
chr17	36120964	36121965	-1	ENSMUSG00000079491	ENSMUST00000174382	H2-T10	FALSE	FALSE	FALSE	TRUE	.	0	0	.	0	0	.	.	chr17	36120964	36121965
chr17	36120648	36121649	-1	ENSMUSG00000079491	ENSMUST00000166442	H2-T10	FALSE	FALSE	FALSE	TRUE	.	0	0	.	0	0	.	.	chr17	36120648	36121649
chr18	58658982	58659983	1	ENSMUSG00000024601	ENSMUST00000025503	Isoc1	FALSE	FALSE	FALSE	TRUE	.	0	0	.	0	0	.	.	chr18	58658982	58659983
chr18	24653191	24654192	1	ENSMUSG00000039616	ENSMUST00000068006	Mocos	FALSE	FALSE	FALSE	TRUE	.	0	0	.	0	0	.	.	chr18	24653191	24654192
chr18	60375529	60376530	1	ENSMUSG00000054072	ENSMUST00000032473	Iigp1	FALSE	FALSE	FALSE	TRUE	.	0	0	.	0	0	.	.	chr18	60375529	60376530
chr18	60375529	60376530	1	ENSMUSG00000054072	ENSMUST00000066912	Iigp1	FALSE	FALSE	FALSE	TRUE	.	0	0	.	0	0	.	.	chr18	60375529	60376530
chr18	60441253	60442254	1	ENSMUSG00000063388	ENSMUST00000073997	BC023105	FALSE	FALSE	FALSE	TRUE	.	0	0	.	0	0	.	.	chr18	60441253	60442254
chr18	60292880	60293881	1	ENSMUSG00000090942	ENSMUST00000171297	F830016B08Rik	FALSE	FALSE	FALSE	TRUE	.	0	0	.	0	0	.	.	chr18	60292880	60293881
chr18	53175865	53176866	1	ENSMUSG00000034484	ENSMUST00000037850	Snx2	FALSE	FALSE	FALSE	TRUE	.	0	0	.	0	0	.	.	chr18	53175865	53176866
chr18	44380002	44381003	1	ENSMUSG00000024472	ENSMUST00000202306	Dcp2	FALSE	TRUE	FALSE	FALSE	.	0	0	chr18	44380982	44381353	element_184	4	chr18	44380002	44381003
chr18	44380027	44381028	1	ENSMUSG00000024472	ENSMUST00000025350	Dcp2	FALSE	TRUE	FALSE	FALSE	.	0	0	chr18	44380982	44381353	element_184	4	chr18	44380027	44381028
chr18	60211580	60212581	1	ENSMUSG00000073555	ENSMUST00000031549	Gm4951	FALSE	TRUE	FALSE	FALSE	.	0	0	chr18	60211733	60212088	element_186	2	chr18	60211580	60212581
chr18	23414929	23415930	1	ENSMUSG00000024302	ENSMUST00000221471	Dtna	FALSE	FALSE	FALSE	TRUE	.	0	0	.	0	0	.	.	chr18	23414929	23415930
chr18	23414942	23415943	1	ENSMUSG00000024302	ENSMUST00000115832	Dtna	FALSE	FALSE	FALSE	TRUE	.	0	0	.	0	0	.	.	chr18	23414942	23415943
chr18	23651068	23652069	1	ENSMUSG00000024302	ENSMUST00000222726	Dtna	FALSE	FALSE	FALSE	TRUE	.	0	0	.	0	0	.	.	chr18	23651068	23652069
chr18	23532259	23533260	1	ENSMUSG00000024302	ENSMUST00000220967	Dtna	FALSE	FALSE	FALSE	TRUE	.	0	0	.	0	0	.	.	chr18	23532259	23533260
chr18	23415010	23416011	1	ENSMUSG00000024302	ENSMUST00000047954	Dtna	FALSE	FALSE	FALSE	TRUE	.	0	0	.	0	0	.	.	chr18	23415010	23416011
chr18	23414990	23415991	1	ENSMUSG00000024302	ENSMUST00000220904	Dtna	FALSE	FALSE	FALSE	TRUE	.	0	0	.	0	0	.	.	chr18	23414990	23415991
chr18	23414635	23415636	1	ENSMUSG00000024302	ENSMUST00000222515	Dtna	FALSE	FALSE	FALSE	TRUE	.	0	0	.	0	0	.	.	chr18	23414635	23415636
chr18	23543062	23544063	1	ENSMUSG00000024302	ENSMUST00000222351	Dtna	FALSE	FALSE	FALSE	TRUE	.	0	0	.	0	0	.	.	chr18	23543062	23544063
chr18	23414977	23415978	1	ENSMUSG00000024302	ENSMUST00000221880	Dtna	FALSE	FALSE	FALSE	TRUE	.	0	0	.	0	0	.	.	chr18	23414977	23415978
chr18	23496335	23497336	1	ENSMUSG00000024302	ENSMUST00000223441	Dtna	FALSE	FALSE	FALSE	TRUE	.	0	0	.	0	0	.	.	chr18	23496335	23497336
chr18	34860707	34861708	1	ENSMUSG00000038418	ENSMUST00000165033	Egr1	FALSE	FALSE	FALSE	TRUE	.	0	0	.	0	0	.	.	chr18	34860707	34861708
chr18	34859323	34860324	1	ENSMUSG00000038418	ENSMUST00000064795	Egr1	FALSE	FALSE	FALSE	TRUE	.	0	0	.	0	0	.	.	chr18	34859323	34860324
chr18	60272766	60273767	-1	ENSMUSG00000068606	ENSMUST00000090260	Gm4841	FALSE	FALSE	FALSE	TRUE	.	0	0	.	0	0	.	.	chr18	60272766	60273767
chr18	74960762	74961763	-1	ENSMUSG00000053846	ENSMUST00000066532	Lipg	FALSE	FALSE	FALSE	TRUE	.	0	0	.	0	0	.	.	chr18	74960762	74961763
chr18	6936120	6937121	-1	ENSMUSG00000061013	ENSMUST00000176586	Mkx	FALSE	FALSE	FALSE	TRUE	.	0	0	.	0	0	.	.	chr18	6936120	6937121
chr18	7003281	7004282	-1	ENSMUSG00000061013	ENSMUST00000176608	Mkx	FALSE	FALSE	FALSE	TRUE	.	0	0	.	0	0	.	.	chr18	7003281	7004282
chr18	6992487	6993488	-1	ENSMUSG00000061013	ENSMUST00000188926	Mkx	FALSE	FALSE	FALSE	TRUE	.	0	0	.	0	0	.	.	chr18	6992487	6993488
chr18	7004279	7005280	-1	ENSMUSG00000061013	ENSMUST00000079788	Mkx	FALSE	FALSE	FALSE	TRUE	.	0	0	.	0	0	.	.	chr18	7004279	7005280
chr18	7004225	7005226	-1	ENSMUSG00000061013	ENSMUST00000176757	Mkx	FALSE	FALSE	FALSE	TRUE	.	0	0	.	0	0	.	.	chr18	7004225	7005226
chr18	4335794	4336795	-1	ENSMUSG00000024235	ENSMUST00000105472	Map3k8	FALSE	FALSE	FALSE	TRUE	.	0	0	.	0	0	.	.	chr18	4335794	4336795
chr18	4352456	4353457	-1	ENSMUSG00000024235	ENSMUST00000173930	Map3k8	FALSE	FALSE	FALSE	TRUE	.	0	0	.	0	0	.	.	chr18	4352456	4353457
chr18	4352514	4353515	-1	ENSMUSG00000024235	ENSMUST00000172805	Map3k8	FALSE	FALSE	FALSE	TRUE	.	0	0	.	0	0	.	.	chr18	4352514	4353515
chr18	4352452	4353453	-1	ENSMUSG00000024235	ENSMUST00000025078	Map3k8	FALSE	FALSE	FALSE	TRUE	.	0	0	.	0	0	.	.	chr18	4352452	4353453
chr18	4334547	4335548	-1	ENSMUSG00000024235	ENSMUST00000173708	Map3k8	FALSE	FALSE	FALSE	TRUE	.	0	0	.	0	0	.	.	chr18	4334547	4335548
chr18	32559533	32560534	-1	ENSMUSG00000090523	ENSMUST00000174459	Gypc	FALSE	FALSE	FALSE	TRUE	.	0	0	.	0	0	.	.	chr18	32559533	32560534
chr18	32534917	32535918	-1	ENSMUSG00000090523	ENSMUST00000172434	Gypc	FALSE	FALSE	FALSE	TRUE	.	0	0	.	0	0	.	.	chr18	32534917	32535918
chr18	32559479	32560480	-1	ENSMUSG00000090523	ENSMUST00000174000	Gypc	FALSE	FALSE	FALSE	TRUE	.	0	0	.	0	0	.	.	chr18	32559479	32560480
chr19	12460279	12461280	1	ENSMUSG00000046805	ENSMUST00000081035	Mpeg1	FALSE	FALSE	FALSE	TRUE	.	0	0	.	0	0	.	.	chr19	12460279	12461280
chr19	42089935	42090936	1	ENSMUSG00000025178	ENSMUST00000066778	Pi4k2a	FALSE	FALSE	FALSE	TRUE	.	0	0	.	0	0	.	.	chr19	42089935	42090936
chr19	46572865	46573866	1	ENSMUSG00000025036	ENSMUST00000026011	Sfxn2	FALSE	FALSE	FALSE	TRUE	.	0	0	.	0	0	.	.	chr19	46572865	46573866
chr19	56396629	56397630	1	ENSMUSG00000025076	ENSMUST00000026062	Casp7	FALSE	FALSE	FALSE	TRUE	.	0	0	.	0	0	.	.	chr19	56396629	56397630
chr19	29251328	29252329	1	ENSMUSG00000024789	ENSMUST00000065796	Jak2	FALSE	FALSE	FALSE	TRUE	.	0	0	.	0	0	.	.	chr19	29251328	29252329
chr19	29251328	29252329	1	ENSMUSG00000024789	ENSMUST00000025705	Jak2	FALSE	FALSE	FALSE	TRUE	.	0	0	.	0	0	.	.	chr19	29251328	29252329
chr19	36436669	36437670	1	ENSMUSG00000024805	ENSMUST00000224859	Pcgf5	FALSE	FALSE	FALSE	TRUE	.	0	0	.	0	0	.	.	chr19	36436669	36437670
chr19	36378568	36379569	1	ENSMUSG00000024805	ENSMUST00000071267	Pcgf5	FALSE	FALSE	FALSE	TRUE	.	0	0	.	0	0	.	.	chr19	36378568	36379569
chr19	36347809	36348810	1	ENSMUSG00000024805	ENSMUST00000225920	Pcgf5	FALSE	FALSE	FALSE	TRUE	.	0	0	.	0	0	.	.	chr19	36347809	36348810
chr19	36391744	36392745	1	ENSMUSG00000024805	ENSMUST00000224971	Pcgf5	FALSE	FALSE	FALSE	TRUE	.	0	0	.	0	0	.	.	chr19	36391744	36392745
chr19	36434084	36435085	1	ENSMUSG00000024805	ENSMUST00000225050	Pcgf5	FALSE	FALSE	FALSE	TRUE	.	0	0	.	0	0	.	.	chr19	36434084	36435085
chr19	36409248	36410249	1	ENSMUSG00000024805	ENSMUST00000225411	Pcgf5	FALSE	FALSE	FALSE	TRUE	.	0	0	.	0	0	.	.	chr19	36409248	36410249
chr19	36439154	36440155	1	ENSMUSG00000024805	ENSMUST00000225185	Pcgf5	FALSE	FALSE	FALSE	TRUE	.	0	0	.	0	0	.	.	chr19	36439154	36440155
chr19	36409248	36410249	1	ENSMUSG00000024805	ENSMUST00000062389	Pcgf5	FALSE	FALSE	FALSE	TRUE	.	0	0	.	0	0	.	.	chr19	36409248	36410249
chr19	36378606	36379607	1	ENSMUSG00000024805	ENSMUST00000224772	Pcgf5	FALSE	FALSE	FALSE	TRUE	.	0	0	.	0	0	.	.	chr19	36378606	36379607
chr19	36378606	36379607	1	ENSMUSG00000024805	ENSMUST00000224679	Pcgf5	FALSE	FALSE	FALSE	TRUE	.	0	0	.	0	0	.	.	chr19	36378606	36379607
chr19	36348037	36349038	1	ENSMUSG00000024805	ENSMUST00000224805	Pcgf5	FALSE	FALSE	FALSE	TRUE	.	0	0	.	0	0	.	.	chr19	36348037	36349038
chr19	6163960	6164961	1	ENSMUSG00000039699	ENSMUST00000132750	Batf2	FALSE	FALSE	FALSE	TRUE	.	0	0	.	0	0	.	.	chr19	6163960	6164961
chr19	6163954	6164955	1	ENSMUSG00000039699	ENSMUST00000135461	Batf2	FALSE	FALSE	FALSE	TRUE	.	0	0	.	0	0	.	.	chr19	6163954	6164955
chr19	6163989	6164990	1	ENSMUSG00000039699	ENSMUST00000141858	Batf2	FALSE	FALSE	FALSE	TRUE	.	0	0	.	0	0	.	.	chr19	6163989	6164990
chr19	6163954	6164955	1	ENSMUSG00000039699	ENSMUST00000139326	Batf2	FALSE	FALSE	FALSE	TRUE	.	0	0	.	0	0	.	.	chr19	6163954	6164955
chr19	6140483	6141484	1	ENSMUSG00000039699	ENSMUST00000134150	Batf2	FALSE	FALSE	FALSE	TRUE	.	0	0	.	0	0	.	.	chr19	6140483	6141484
chr19	6163939	6164940	1	ENSMUSG00000039699	ENSMUST00000045042	Batf2	FALSE	FALSE	FALSE	TRUE	.	0	0	.	0	0	.	.	chr19	6163939	6164940
chr19	34550210	34551211	1	ENSMUSG00000045932	ENSMUST00000102826	Ifit2	FALSE	FALSE	FALSE	TRUE	.	0	0	.	0	0	.	.	chr19	34550210	34551211
chr19	34550194	34551195	1	ENSMUSG00000045932	ENSMUST00000149829	Ifit2	FALSE	FALSE	FALSE	TRUE	.	0	0	.	0	0	.	.	chr19	34550194	34551195
chr19	34583031	34584032	1	ENSMUSG00000074896	ENSMUST00000102825	Ifit3	FALSE	FALSE	FALSE	TRUE	.	0	0	.	0	0	.	.	chr19	34583031	34584032
chr19	34607470	34608471	1	ENSMUSG00000062488	ENSMUST00000076249	Ifit3b	FALSE	TRUE	FALSE	FALSE	.	0	0	chr19	34607388	34607985	element_197	3	chr19	34607470	34608471
chr19	34640371	34641372	1	ENSMUSG00000034459	ENSMUST00000102824	Ifit1	FALSE	TRUE	FALSE	FALSE	.	0	0	chr19	34640590	34641048	element_198	1	chr19	34640371	34641372
chr19	11536301	11537302	1	ENSMUSG00000024678	ENSMUST00000025581	Ms4a4d	FALSE	FALSE	FALSE	TRUE	.	0	0	.	0	0	.	.	chr19	11536301	11537302
chr19	3934726	3935727	1	ENSMUSG00000036908	ENSMUST00000162193	Unc93b1	FALSE	FALSE	FALSE	TRUE	.	0	0	.	0	0	.	.	chr19	3934726	3935727
chr19	3934686	3935687	1	ENSMUSG00000036908	ENSMUST00000162708	Unc93b1	FALSE	FALSE	FALSE	TRUE	.	0	0	.	0	0	.	.	chr19	3934686	3935687
chr19	3941940	3942941	1	ENSMUSG00000036908	ENSMUST00000161415	Unc93b1	FALSE	FALSE	FALSE	TRUE	.	0	0	.	0	0	.	.	chr19	3941940	3942941
chr19	3934686	3935687	1	ENSMUSG00000036908	ENSMUST00000165711	Unc93b1	FALSE	FALSE	FALSE	TRUE	.	0	0	.	0	0	.	.	chr19	3934686	3935687
chr19	37207076	37208077	1	ENSMUSG00000023307	ENSMUST00000148105	March5	FALSE	FALSE	FALSE	TRUE	.	0	0	.	0	0	.	.	chr19	37207076	37208077
chr19	37207068	37208069	1	ENSMUSG00000023307	ENSMUST00000112391	March5	FALSE	FALSE	FALSE	TRUE	.	0	0	.	0	0	.	.	chr19	37207068	37208069
chr19	37207043	37208044	1	ENSMUSG00000023307	ENSMUST00000024078	March5	FALSE	FALSE	FALSE	TRUE	.	0	0	.	0	0	.	.	chr19	37207043	37208044
chr19	37216690	37217691	1	ENSMUSG00000023307	ENSMUST00000128530	March5	FALSE	FALSE	FALSE	TRUE	.	0	0	.	0	0	.	.	chr19	37216690	37217691
chr19	29366955	29367956	1	ENSMUSG00000016496	ENSMUST00000016640	Cd274	FALSE	TRUE	FALSE	FALSE	.	0	0	chr19	29366892	29367338	element_195	3	chr19	29366955	29367956
chr19	32060968	32061969	-1	ENSMUSG00000024887	ENSMUST00000096119	Asah2	FALSE	FALSE	FALSE	TRUE	.	0	0	.	0	0	.	.	chr19	32060968	32061969
chr19	34474634	34475635	-1	ENSMUSG00000050370	ENSMUST00000050562	Ch25h	FALSE	FALSE	FALSE	TRUE	.	0	0	.	0	0	.	.	chr19	34474634	34475635
chr19	43674380	43675381	-1	ENSMUSG00000040414	ENSMUST00000046038	Slc25a28	FALSE	FALSE	FALSE	TRUE	.	0	0	.	0	0	.	.	chr19	43674380	43675381
chr19	11050065	11051066	-1	ENSMUSG00000075010	ENSMUST00000099676	AW112010	FALSE	FALSE	FALSE	TRUE	.	0	0	.	0	0	.	.	chr19	11050065	11051066
chr19	34601467	34602468	-1	ENSMUSG00000079339	ENSMUST00000168254	Ifit1bl1	FALSE	FALSE	FALSE	TRUE	.	0	0	.	0	0	.	.	chr19	34601467	34602468
chr19	34598826	34599827	-1	ENSMUSG00000079339	ENSMUST00000112467	Ifit1bl1	FALSE	FALSE	FALSE	TRUE	.	0	0	.	0	0	.	.	chr19	34598826	34599827
chr19	34629309	34630310	-1	ENSMUSG00000067297	ENSMUST00000112463	Ifit1bl2	FALSE	FALSE	FALSE	TRUE	.	0	0	.	0	0	.	.	chr19	34629309	34630310
chr19	34640242	34641243	-1	ENSMUSG00000067297	ENSMUST00000087357	Ifit1bl2	FALSE	TRUE	FALSE	FALSE	.	0	0	chr19	34640590	34641048	element_198	1	chr19	34640242	34641243
chr19	3897330	3898331	-1	ENSMUSG00000001750	ENSMUST00000134698	Tcirg1	FALSE	FALSE	FALSE	TRUE	.	0	0	.	0	0	.	.	chr19	3897330	3898331
chr19	3906632	3907633	-1	ENSMUSG00000001750	ENSMUST00000001801	Tcirg1	FALSE	FALSE	FALSE	TRUE	.	0	0	.	0	0	.	.	chr19	3906632	3907633
chr19	3898352	3899353	-1	ENSMUSG00000001750	ENSMUST00000126643	Tcirg1	FALSE	FALSE	FALSE	TRUE	.	0	0	.	0	0	.	.	chr19	3898352	3899353
chr19	3902854	3903855	-1	ENSMUSG00000001750	ENSMUST00000132164	Tcirg1	FALSE	FALSE	FALSE	TRUE	.	0	0	.	0	0	.	.	chr19	3902854	3903855
chr19	3906611	3907612	-1	ENSMUSG00000001750	ENSMUST00000135070	Tcirg1	FALSE	FALSE	FALSE	TRUE	.	0	0	.	0	0	.	.	chr19	3906611	3907612
chr19	3896729	3897730	-1	ENSMUSG00000001750	ENSMUST00000162688	Tcirg1	FALSE	FALSE	FALSE	TRUE	.	0	0	.	0	0	.	.	chr19	3896729	3897730
chr19	3906490	3907491	-1	ENSMUSG00000001750	ENSMUST00000126070	Tcirg1	FALSE	FALSE	FALSE	TRUE	.	0	0	.	0	0	.	.	chr19	3906490	3907491
chr19	3902745	3903746	-1	ENSMUSG00000001750	ENSMUST00000159824	Tcirg1	FALSE	FALSE	FALSE	TRUE	.	0	0	.	0	0	.	.	chr19	3902745	3903746
chr19	3903920	3904921	-1	ENSMUSG00000001750	ENSMUST00000127308	Tcirg1	FALSE	FALSE	FALSE	TRUE	.	0	0	.	0	0	.	.	chr19	3903920	3904921
chr19	3906539	3907540	-1	ENSMUSG00000001750	ENSMUST00000125792	Tcirg1	FALSE	FALSE	FALSE	TRUE	.	0	0	.	0	0	.	.	chr19	3906539	3907540
chr19	3901522	3902523	-1	ENSMUSG00000001750	ENSMUST00000122885	Tcirg1	FALSE	FALSE	FALSE	TRUE	.	0	0	.	0	0	.	.	chr19	3901522	3902523
chr19	3902571	3903572	-1	ENSMUSG00000001750	ENSMUST00000131327	Tcirg1	FALSE	FALSE	FALSE	TRUE	.	0	0	.	0	0	.	.	chr19	3902571	3903572
chr19	3904729	3905730	-1	ENSMUSG00000001750	ENSMUST00000145791	Tcirg1	FALSE	FALSE	FALSE	TRUE	.	0	0	.	0	0	.	.	chr19	3904729	3905730
chr19	58454660	58455661	-1	ENSMUSG00000025089	ENSMUST00000135730	Gfra1	FALSE	FALSE	FALSE	TRUE	.	0	0	.	0	0	.	.	chr19	58454660	58455661
chr19	58454119	58455120	-1	ENSMUSG00000025089	ENSMUST00000123957	Gfra1	FALSE	FALSE	FALSE	TRUE	.	0	0	.	0	0	.	.	chr19	58454119	58455120
chr19	58454091	58455092	-1	ENSMUSG00000025089	ENSMUST00000129100	Gfra1	FALSE	FALSE	FALSE	TRUE	.	0	0	.	0	0	.	.	chr19	58454091	58455092
chr19	58454505	58455506	-1	ENSMUSG00000025089	ENSMUST00000138530	Gfra1	FALSE	FALSE	FALSE	TRUE	.	0	0	.	0	0	.	.	chr19	58454505	58455506
chr19	58454800	58455801	-1	ENSMUSG00000025089	ENSMUST00000152507	Gfra1	FALSE	FALSE	FALSE	TRUE	.	0	0	.	0	0	.	.	chr19	58454800	58455801
chr19	58453965	58454966	-1	ENSMUSG00000025089	ENSMUST00000169850	Gfra1	FALSE	FALSE	FALSE	TRUE	.	0	0	.	0	0	.	.	chr19	58453965	58454966
chr19	58455408	58456409	-1	ENSMUSG00000025089	ENSMUST00000131877	Gfra1	FALSE	FALSE	FALSE	TRUE	.	0	0	.	0	0	.	.	chr19	58455408	58456409
chr19	58454897	58455898	-1	ENSMUSG00000025089	ENSMUST00000026076	Gfra1	FALSE	FALSE	FALSE	TRUE	.	0	0	.	0	0	.	.	chr19	58454897	58455898
chr19	58454858	58455859	-1	ENSMUSG00000025089	ENSMUST00000140141	Gfra1	FALSE	FALSE	FALSE	TRUE	.	0	0	.	0	0	.	.	chr19	58454858	58455859
chr19	12530039	12531040	-1	ENSMUSG00000111118	ENSMUST00000217186	Gm6545	FALSE	FALSE	FALSE	TRUE	.	0	0	.	0	0	.	.	chr19	12530039	12531040
chr2	167502589	167503590	1	ENSMUSG00000006418	ENSMUST00000078050	Rnf114	FALSE	FALSE	FALSE	TRUE	.	0	0	.	0	0	.	.	chr2	167502589	167503590
chr2	167502946	167503947	1	ENSMUSG00000006418	ENSMUST00000127939	Rnf114	FALSE	FALSE	FALSE	TRUE	.	0	0	.	0	0	.	.	chr2	167502946	167503947
chr2	167492145	167493146	1	ENSMUSG00000006418	ENSMUST00000109214	Rnf114	FALSE	FALSE	FALSE	TRUE	.	0	0	.	0	0	.	.	chr2	167492145	167493146
chr2	93187061	93188062	1	ENSMUSG00000068735	ENSMUST00000147377	Trp53i11	FALSE	FALSE	FALSE	TRUE	.	0	0	.	0	0	.	.	chr2	93187061	93188062
chr2	93198419	93199420	1	ENSMUSG00000068735	ENSMUST00000143164	Trp53i11	FALSE	FALSE	FALSE	TRUE	.	0	0	.	0	0	.	.	chr2	93198419	93199420
chr2	93187048	93188049	1	ENSMUSG00000068735	ENSMUST00000150462	Trp53i11	FALSE	FALSE	FALSE	TRUE	.	0	0	.	0	0	.	.	chr2	93187048	93188049
chr2	93187061	93188062	1	ENSMUSG00000068735	ENSMUST00000140172	Trp53i11	FALSE	FALSE	FALSE	TRUE	.	0	0	.	0	0	.	.	chr2	93187061	93188062
chr2	93187048	93188049	1	ENSMUSG00000068735	ENSMUST00000111266	Trp53i11	FALSE	FALSE	FALSE	TRUE	.	0	0	.	0	0	.	.	chr2	93187048	93188049
chr2	93188691	93189692	1	ENSMUSG00000068735	ENSMUST00000127173	Trp53i11	FALSE	FALSE	FALSE	TRUE	.	0	0	.	0	0	.	.	chr2	93188691	93189692
chr2	93187170	93188171	1	ENSMUSG00000068735	ENSMUST00000132182	Trp53i11	FALSE	FALSE	FALSE	TRUE	.	0	0	.	0	0	.	.	chr2	93187170	93188171
chr2	93187084	93188085	1	ENSMUSG00000068735	ENSMUST00000090554	Trp53i11	FALSE	FALSE	FALSE	TRUE	.	0	0	.	0	0	.	.	chr2	93187084	93188085
chr2	180588962	180589963	1	ENSMUSG00000049401	ENSMUST00000147070	Ogfr	FALSE	TRUE	FALSE	FALSE	.	0	0	chr2	180589179	180589804	element_222	4	chr2	180588962	180589963
chr2	180588745	180589746	1	ENSMUSG00000049401	ENSMUST00000029087	Ogfr	FALSE	TRUE	FALSE	FALSE	.	0	0	chr2	180589179	180589804	element_222	4	chr2	180588745	180589746
chr2	122147186	122148187	1	ENSMUSG00000060802	ENSMUST00000102476	B2m	FALSE	TRUE	FALSE	FALSE	.	0	0	chr2	122147420	122147679	element_206	4	chr2	122147186	122148187
chr2	79255447	79256448	1	ENSMUSG00000027009	ENSMUST00000126312	Itga4	FALSE	FALSE	FALSE	TRUE	.	0	0	.	0	0	.	.	chr2	79255447	79256448
chr2	79254926	79255927	1	ENSMUSG00000027009	ENSMUST00000155105	Itga4	FALSE	FALSE	FALSE	TRUE	.	0	0	.	0	0	.	.	chr2	79254926	79255927
chr2	79255221	79256222	1	ENSMUSG00000027009	ENSMUST00000135919	Itga4	FALSE	FALSE	FALSE	TRUE	.	0	0	.	0	0	.	.	chr2	79255221	79256222
chr2	79255000	79256001	1	ENSMUSG00000027009	ENSMUST00000099972	Itga4	FALSE	FALSE	FALSE	TRUE	.	0	0	.	0	0	.	.	chr2	79255000	79256001
chr2	79255072	79256073	1	ENSMUSG00000027009	ENSMUST00000141094	Itga4	FALSE	FALSE	FALSE	TRUE	.	0	0	.	0	0	.	.	chr2	79255072	79256073
chr2	122637415	122638416	1	ENSMUSG00000033213	ENSMUST00000110512	AA467197	FALSE	FALSE	FALSE	TRUE	.	0	0	.	0	0	.	.	chr2	122637415	122638416
chr2	122637350	122638351	1	ENSMUSG00000033213	ENSMUST00000047498	AA467197	FALSE	FALSE	FALSE	TRUE	.	0	0	.	0	0	.	.	chr2	122637350	122638351
chr2	122636486	122637487	1	ENSMUSG00000033213	ENSMUST00000142767	AA467197	FALSE	FALSE	FALSE	TRUE	.	0	0	.	0	0	.	.	chr2	122636486	122637487
chr2	122637415	122638416	1	ENSMUSG00000033213	ENSMUST00000175727	AA467197	FALSE	FALSE	FALSE	TRUE	.	0	0	.	0	0	.	.	chr2	122637415	122638416
chr2	145821650	145822651	1	ENSMUSG00000001768	ENSMUST00000144278	Rin2	FALSE	FALSE	FALSE	TRUE	.	0	0	.	0	0	.	.	chr2	145821650	145822651
chr2	145785662	145786663	1	ENSMUSG00000001768	ENSMUST00000150449	Rin2	FALSE	FALSE	FALSE	TRUE	.	0	0	.	0	0	.	.	chr2	145785662	145786663
chr2	145862144	145863145	1	ENSMUSG00000001768	ENSMUST00000145874	Rin2	FALSE	FALSE	FALSE	TRUE	.	0	0	.	0	0	.	.	chr2	145862144	145863145
chr2	145821789	145822790	1	ENSMUSG00000001768	ENSMUST00000149269	Rin2	FALSE	FALSE	FALSE	TRUE	.	0	0	.	0	0	.	.	chr2	145821789	145822790
chr2	145784234	145785235	1	ENSMUSG00000001768	ENSMUST00000142847	Rin2	FALSE	FALSE	FALSE	TRUE	.	0	0	.	0	0	.	.	chr2	145784234	145785235
chr2	145674867	145675868	1	ENSMUSG00000001768	ENSMUST00000144661	Rin2	FALSE	FALSE	FALSE	TRUE	.	0	0	.	0	0	.	.	chr2	145674867	145675868
chr2	145674715	145675716	1	ENSMUSG00000001768	ENSMUST00000231581	Rin2	FALSE	FALSE	FALSE	TRUE	.	0	0	.	0	0	.	.	chr2	145674715	145675716
chr2	145785616	145786617	1	ENSMUSG00000001768	ENSMUST00000147976	Rin2	FALSE	FALSE	FALSE	TRUE	.	0	0	.	0	0	.	.	chr2	145785616	145786617
chr2	145785480	145786481	1	ENSMUSG00000001768	ENSMUST00000110005	Rin2	FALSE	FALSE	FALSE	TRUE	.	0	0	.	0	0	.	.	chr2	145785480	145786481
chr2	145700697	145701698	1	ENSMUSG00000001768	ENSMUST00000137180	Rin2	FALSE	FALSE	FALSE	TRUE	.	0	0	.	0	0	.	.	chr2	145700697	145701698
chr2	145785616	145786617	1	ENSMUSG00000001768	ENSMUST00000094480	Rin2	FALSE	FALSE	FALSE	TRUE	.	0	0	.	0	0	.	.	chr2	145785616	145786617
chr2	84802203	84803204	1	ENSMUSG00000027078	ENSMUST00000154709	Ube2l6	FALSE	FALSE	FALSE	TRUE	.	0	0	.	0	0	.	.	chr2	84802203	84803204
chr2	84798334	84799335	1	ENSMUSG00000027078	ENSMUST00000150325	Ube2l6	FALSE	FALSE	FALSE	TRUE	.	0	0	.	0	0	.	.	chr2	84798334	84799335
chr2	84805729	84806730	1	ENSMUSG00000027078	ENSMUST00000159150	Ube2l6	FALSE	FALSE	FALSE	TRUE	.	0	0	.	0	0	.	.	chr2	84805729	84806730
chr2	84798328	84799329	1	ENSMUSG00000027078	ENSMUST00000102642	Ube2l6	FALSE	FALSE	FALSE	TRUE	.	0	0	.	0	0	.	.	chr2	84798328	84799329
chr2	103970679	103971680	1	ENSMUSG00000032698	ENSMUST00000133210	Lmo2	FALSE	FALSE	FALSE	TRUE	.	0	0	.	0	0	.	.	chr2	103970679	103971680
chr2	103969629	103970630	1	ENSMUSG00000032698	ENSMUST00000111143	Lmo2	FALSE	FALSE	FALSE	TRUE	.	0	0	.	0	0	.	.	chr2	103969629	103970630
chr2	103969723	103970724	1	ENSMUSG00000032698	ENSMUST00000111140	Lmo2	FALSE	FALSE	FALSE	TRUE	.	0	0	.	0	0	.	.	chr2	103969723	103970724
chr2	103957486	103958487	1	ENSMUSG00000032698	ENSMUST00000156813	Lmo2	FALSE	FALSE	FALSE	TRUE	.	0	0	.	0	0	.	.	chr2	103957486	103958487
chr2	103957495	103958496	1	ENSMUSG00000032698	ENSMUST00000170926	Lmo2	FALSE	FALSE	FALSE	TRUE	.	0	0	.	0	0	.	.	chr2	103957495	103958496
chr2	103969028	103970029	1	ENSMUSG00000032698	ENSMUST00000123437	Lmo2	FALSE	FALSE	FALSE	TRUE	.	0	0	.	0	0	.	.	chr2	103969028	103970029
chr2	103969744	103970745	1	ENSMUSG00000032698	ENSMUST00000111139	Lmo2	FALSE	FALSE	FALSE	TRUE	.	0	0	.	0	0	.	.	chr2	103969744	103970745
chr2	103969641	103970642	1	ENSMUSG00000032698	ENSMUST00000138815	Lmo2	FALSE	FALSE	FALSE	TRUE	.	0	0	.	0	0	.	.	chr2	103969641	103970642
chr2	4752217	4753218	1	ENSMUSG00000048186	ENSMUST00000138322	Bend7	FALSE	FALSE	FALSE	TRUE	.	0	0	.	0	0	.	.	chr2	4752217	4753218
chr2	4717645	4718646	1	ENSMUSG00000048186	ENSMUST00000056914	Bend7	FALSE	FALSE	FALSE	TRUE	.	0	0	.	0	0	.	.	chr2	4717645	4718646
chr2	4717331	4718332	1	ENSMUSG00000048186	ENSMUST00000184139	Bend7	FALSE	FALSE	FALSE	TRUE	.	0	0	.	0	0	.	.	chr2	4717331	4718332
chr2	4717334	4718335	1	ENSMUSG00000048186	ENSMUST00000115022	Bend7	FALSE	FALSE	FALSE	TRUE	.	0	0	.	0	0	.	.	chr2	4717334	4718335
chr2	69379945	69380946	1	ENSMUSG00000027068	ENSMUST00000063690	Dhrs9	FALSE	FALSE	FALSE	TRUE	.	0	0	.	0	0	.	.	chr2	69379945	69380946
chr2	24975533	24976534	1	ENSMUSG00000036833	ENSMUST00000045295	Pnpla7	FALSE	FALSE	FALSE	TRUE	.	0	0	.	0	0	.	.	chr2	24975533	24976534
chr2	24981615	24982616	1	ENSMUSG00000036833	ENSMUST00000142139	Pnpla7	FALSE	FALSE	FALSE	TRUE	.	0	0	.	0	0	.	.	chr2	24981615	24982616
chr2	24975648	24976649	1	ENSMUSG00000036833	ENSMUST00000139643	Pnpla7	FALSE	FALSE	FALSE	TRUE	.	0	0	.	0	0	.	.	chr2	24975648	24976649
chr2	24975589	24976590	1	ENSMUSG00000036833	ENSMUST00000152777	Pnpla7	FALSE	FALSE	FALSE	TRUE	.	0	0	.	0	0	.	.	chr2	24975589	24976590
chr2	25039006	25040007	1	ENSMUSG00000036833	ENSMUST00000132082	Pnpla7	FALSE	FALSE	FALSE	TRUE	.	0	0	.	0	0	.	.	chr2	25039006	25040007
chr2	24975601	24976602	1	ENSMUSG00000036833	ENSMUST00000139031	Pnpla7	FALSE	FALSE	FALSE	TRUE	.	0	0	.	0	0	.	.	chr2	24975601	24976602
chr2	24975573	24976574	1	ENSMUSG00000036833	ENSMUST00000137913	Pnpla7	FALSE	FALSE	FALSE	TRUE	.	0	0	.	0	0	.	.	chr2	24975573	24976574
chr2	24995165	24996166	1	ENSMUSG00000036833	ENSMUST00000145508	Pnpla7	FALSE	FALSE	FALSE	TRUE	.	0	0	.	0	0	.	.	chr2	24995165	24996166
chr2	25051221	25052222	1	ENSMUSG00000036833	ENSMUST00000128517	Pnpla7	FALSE	FALSE	FALSE	TRUE	.	0	0	.	0	0	.	.	chr2	25051221	25052222
chr2	24995657	24996658	1	ENSMUSG00000036833	ENSMUST00000146153	Pnpla7	FALSE	FALSE	FALSE	TRUE	.	0	0	.	0	0	.	.	chr2	24995657	24996658
chr2	25051408	25052409	1	ENSMUSG00000036833	ENSMUST00000138536	Pnpla7	FALSE	FALSE	FALSE	TRUE	.	0	0	.	0	0	.	.	chr2	25051408	25052409
chr2	25052654	25053655	1	ENSMUSG00000036833	ENSMUST00000141584	Pnpla7	FALSE	FALSE	FALSE	TRUE	.	0	0	.	0	0	.	.	chr2	25052654	25053655
chr2	25051166	25052167	1	ENSMUSG00000036833	ENSMUST00000155601	Pnpla7	FALSE	FALSE	FALSE	TRUE	.	0	0	.	0	0	.	.	chr2	25051166	25052167
chr2	25050852	25051853	1	ENSMUSG00000036833	ENSMUST00000154359	Pnpla7	FALSE	FALSE	FALSE	TRUE	.	0	0	.	0	0	.	.	chr2	25050852	25051853
chr2	24975588	24976589	1	ENSMUSG00000036833	ENSMUST00000153618	Pnpla7	FALSE	FALSE	FALSE	TRUE	.	0	0	.	0	0	.	.	chr2	24975588	24976589
chr2	11705348	11706349	1	ENSMUSG00000023206	ENSMUST00000114832	Il15ra	FALSE	FALSE	FALSE	TRUE	.	0	0	.	0	0	.	.	chr2	11705348	11706349
chr2	11704943	11705944	1	ENSMUSG00000023206	ENSMUST00000148748	Il15ra	FALSE	FALSE	FALSE	TRUE	.	0	0	.	0	0	.	.	chr2	11704943	11705944
chr2	11704849	11705850	1	ENSMUSG00000023206	ENSMUST00000135341	Il15ra	FALSE	FALSE	FALSE	TRUE	.	0	0	.	0	0	.	.	chr2	11704849	11705850
chr2	11705259	11706260	1	ENSMUSG00000023206	ENSMUST00000124448	Il15ra	FALSE	FALSE	FALSE	TRUE	.	0	0	.	0	0	.	.	chr2	11705259	11706260
chr2	11705311	11706312	1	ENSMUSG00000023206	ENSMUST00000114831	Il15ra	FALSE	FALSE	FALSE	TRUE	.	0	0	.	0	0	.	.	chr2	11705311	11706312
chr2	11705310	11706311	1	ENSMUSG00000023206	ENSMUST00000114834	Il15ra	FALSE	FALSE	FALSE	TRUE	.	0	0	.	0	0	.	.	chr2	11705310	11706311
chr2	11704869	11705870	1	ENSMUSG00000023206	ENSMUST00000128156	Il15ra	FALSE	FALSE	FALSE	TRUE	.	0	0	.	0	0	.	.	chr2	11704869	11705870
chr2	11705212	11706213	1	ENSMUSG00000023206	ENSMUST00000138856	Il15ra	FALSE	FALSE	FALSE	TRUE	.	0	0	.	0	0	.	.	chr2	11705212	11706213
chr2	11722664	11723665	1	ENSMUSG00000023206	ENSMUST00000139774	Il15ra	FALSE	FALSE	FALSE	TRUE	.	0	0	.	0	0	.	.	chr2	11722664	11723665
chr2	11704829	11705830	1	ENSMUSG00000023206	ENSMUST00000091456	Il15ra	FALSE	FALSE	FALSE	TRUE	.	0	0	.	0	0	.	.	chr2	11704829	11705830
chr2	11705310	11706311	1	ENSMUSG00000023206	ENSMUST00000114833	Il15ra	FALSE	FALSE	FALSE	TRUE	.	0	0	.	0	0	.	.	chr2	11705310	11706311
chr2	11705277	11706278	1	ENSMUSG00000023206	ENSMUST00000078834	Il15ra	FALSE	FALSE	FALSE	TRUE	.	0	0	.	0	0	.	.	chr2	11705277	11706278
chr2	11717931	11718932	1	ENSMUSG00000023206	ENSMUST00000123600	Il15ra	FALSE	FALSE	FALSE	TRUE	.	0	0	.	0	0	.	.	chr2	11717931	11718932
chr2	11705052	11706053	1	ENSMUSG00000023206	ENSMUST00000126394	Il15ra	FALSE	FALSE	FALSE	TRUE	.	0	0	.	0	0	.	.	chr2	11705052	11706053
chr2	11704790	11705791	1	ENSMUSG00000023206	ENSMUST00000138349	Il15ra	FALSE	FALSE	FALSE	TRUE	.	0	0	.	0	0	.	.	chr2	11704790	11705791
chr2	11704887	11705888	1	ENSMUSG00000023206	ENSMUST00000191662	Il15ra	FALSE	FALSE	FALSE	TRUE	.	0	0	.	0	0	.	.	chr2	11704887	11705888
chr2	11717827	11718828	1	ENSMUSG00000023206	ENSMUST00000133975	Il15ra	FALSE	FALSE	FALSE	TRUE	.	0	0	.	0	0	.	.	chr2	11717827	11718828
chr2	11704875	11705876	1	ENSMUSG00000023206	ENSMUST00000130245	Il15ra	FALSE	FALSE	FALSE	TRUE	.	0	0	.	0	0	.	.	chr2	11704875	11705876
chr2	83857588	83858589	1	ENSMUSG00000048388	ENSMUST00000148184	Fam171b	FALSE	FALSE	FALSE	TRUE	.	0	0	.	0	0	.	.	chr2	83857588	83858589
chr2	83812136	83813137	1	ENSMUSG00000048388	ENSMUST00000051454	Fam171b	FALSE	FALSE	FALSE	TRUE	.	0	0	.	0	0	.	.	chr2	83812136	83813137
chr2	181235253	181236254	-1	ENSMUSG00000027580	ENSMUST00000149417	Helz2	FALSE	FALSE	FALSE	TRUE	.	0	0	.	0	0	.	.	chr2	181235253	181236254
chr2	181241526	181242527	-1	ENSMUSG00000027580	ENSMUST00000108831	Helz2	FALSE	TRUE	FALSE	FALSE	.	0	0	chr2	181241733	181242192	element_223	1	chr2	181241526	181242527
chr2	181241462	181242463	-1	ENSMUSG00000027580	ENSMUST00000121484	Helz2	FALSE	TRUE	FALSE	FALSE	.	0	0	chr2	181241733	181242192	element_223	1	chr2	181241462	181242463
chr2	181241524	181242525	-1	ENSMUSG00000027580	ENSMUST00000155049	Helz2	FALSE	TRUE	FALSE	FALSE	.	0	0	chr2	181241733	181242192	element_223	1	chr2	181241524	181242525
chr2	181241524	181242525	-1	ENSMUSG00000027580	ENSMUST00000094203	Helz2	FALSE	TRUE	FALSE	FALSE	.	0	0	chr2	181241733	181242192	element_223	1	chr2	181241524	181242525
chr2	167062138	167063139	-1	ENSMUSG00000039501	ENSMUST00000135967	Znfx1	FALSE	FALSE	FALSE	TRUE	.	0	0	.	0	0	.	.	chr2	167062138	167063139
chr2	167059924	167060925	-1	ENSMUSG00000039501	ENSMUST00000155281	Znfx1	FALSE	FALSE	FALSE	TRUE	.	0	0	.	0	0	.	.	chr2	167059924	167060925
chr2	167062215	167063216	-1	ENSMUSG00000039501	ENSMUST00000128676	Znfx1	FALSE	FALSE	FALSE	TRUE	.	0	0	.	0	0	.	.	chr2	167062215	167063216
chr2	167062514	167063515	-1	ENSMUSG00000039501	ENSMUST00000048988	Znfx1	FALSE	FALSE	FALSE	TRUE	.	0	0	.	0	0	.	.	chr2	167062514	167063515
chr2	167042994	167043995	-1	ENSMUSG00000039501	ENSMUST00000067584	Znfx1	FALSE	FALSE	FALSE	TRUE	.	0	0	.	0	0	.	.	chr2	167042994	167043995
chr2	167313399	167314400	-1	ENSMUSG00000017929	ENSMUST00000133557	B4galt5	FALSE	FALSE	FALSE	TRUE	.	0	0	.	0	0	.	.	chr2	167313399	167314400
chr2	167348682	167349683	-1	ENSMUSG00000017929	ENSMUST00000109221	B4galt5	FALSE	FALSE	FALSE	TRUE	.	0	0	.	0	0	.	.	chr2	167348682	167349683
chr2	167313354	167314355	-1	ENSMUSG00000017929	ENSMUST00000155623	B4galt5	FALSE	FALSE	FALSE	TRUE	.	0	0	.	0	0	.	.	chr2	167313354	167314355
chr2	167305197	167306198	-1	ENSMUSG00000017929	ENSMUST00000149698	B4galt5	FALSE	FALSE	FALSE	TRUE	.	0	0	.	0	0	.	.	chr2	167305197	167306198
chr2	119028892	119029893	-1	ENSMUSG00000039983	ENSMUST00000110834	Ccdc32	FALSE	FALSE	FALSE	TRUE	.	0	0	.	0	0	.	.	chr2	119028892	119029893
chr2	119028876	119029877	-1	ENSMUSG00000039983	ENSMUST00000110833	Ccdc32	FALSE	FALSE	FALSE	TRUE	.	0	0	.	0	0	.	.	chr2	119028876	119029877
chr2	119028892	119029893	-1	ENSMUSG00000039983	ENSMUST00000036470	Ccdc32	FALSE	FALSE	FALSE	TRUE	.	0	0	.	0	0	.	.	chr2	119028892	119029893
chr2	119156323	119157324	-1	ENSMUSG00000070730	ENSMUST00000135419	Rmdn3	FALSE	FALSE	FALSE	TRUE	.	0	0	.	0	0	.	.	chr2	119156323	119157324
chr2	119156463	119157464	-1	ENSMUSG00000070730	ENSMUST00000139519	Rmdn3	FALSE	FALSE	FALSE	TRUE	.	0	0	.	0	0	.	.	chr2	119156463	119157464
chr2	119156447	119157448	-1	ENSMUSG00000070730	ENSMUST00000129351	Rmdn3	FALSE	FALSE	FALSE	TRUE	.	0	0	.	0	0	.	.	chr2	119156447	119157448
chr2	119140374	119141375	-1	ENSMUSG00000070730	ENSMUST00000127965	Rmdn3	FALSE	FALSE	FALSE	TRUE	.	0	0	.	0	0	.	.	chr2	119140374	119141375
chr2	119156533	119157534	-1	ENSMUSG00000070730	ENSMUST00000094695	Rmdn3	FALSE	FALSE	FALSE	TRUE	.	0	0	.	0	0	.	.	chr2	119156533	119157534
chr2	119146944	119147945	-1	ENSMUSG00000070730	ENSMUST00000130249	Rmdn3	FALSE	FALSE	FALSE	TRUE	.	0	0	.	0	0	.	.	chr2	119146944	119147945
chr2	119146935	119147936	-1	ENSMUSG00000070730	ENSMUST00000156332	Rmdn3	FALSE	FALSE	FALSE	TRUE	.	0	0	.	0	0	.	.	chr2	119146935	119147936
chr2	157134436	157135437	-1	ENSMUSG00000027639	ENSMUST00000149313	Samhd1	FALSE	TRUE	FALSE	FALSE	.	0	0	chr2	157135220	157135473	element_216	4	chr2	157134436	157135437
chr2	157110111	157111112	-1	ENSMUSG00000027639	ENSMUST00000160213	Samhd1	FALSE	FALSE	FALSE	TRUE	.	0	0	.	0	0	.	.	chr2	157110111	157111112
chr2	157134705	157135706	-1	ENSMUSG00000027639	ENSMUST00000109549	Samhd1	FALSE	TRUE	FALSE	FALSE	.	0	0	chr2	157135220	157135473	element_216	4	chr2	157134705	157135706
chr2	157134764	157135765	-1	ENSMUSG00000027639	ENSMUST00000057725	Samhd1	FALSE	TRUE	FALSE	FALSE	.	0	0	chr2	157135220	157135473	element_216	4	chr2	157134764	157135765
chr2	157109539	157110540	-1	ENSMUSG00000027639	ENSMUST00000139149	Samhd1	FALSE	FALSE	FALSE	TRUE	.	0	0	.	0	0	.	.	chr2	157109539	157110540
chr2	157134619	157135620	-1	ENSMUSG00000027639	ENSMUST00000139263	Samhd1	FALSE	TRUE	FALSE	FALSE	.	0	0	chr2	157135220	157135473	element_216	4	chr2	157134619	157135620
chr2	157110110	157111111	-1	ENSMUSG00000027639	ENSMUST00000142508	Samhd1	FALSE	FALSE	FALSE	TRUE	.	0	0	.	0	0	.	.	chr2	157110110	157111111
chr2	157129556	157130557	-1	ENSMUSG00000027639	ENSMUST00000152866	Samhd1	FALSE	FALSE	FALSE	TRUE	.	0	0	.	0	0	.	.	chr2	157129556	157130557
chr2	157134592	157135593	-1	ENSMUSG00000027639	ENSMUST00000123932	Samhd1	FALSE	TRUE	FALSE	FALSE	.	0	0	chr2	157135220	157135473	element_216	4	chr2	157134592	157135593
chr2	157134721	157135722	-1	ENSMUSG00000027639	ENSMUST00000088523	Samhd1	FALSE	TRUE	FALSE	FALSE	.	0	0	chr2	157135220	157135473	element_216	4	chr2	157134721	157135722
chr2	126919844	126920845	-1	ENSMUSG00000027366	ENSMUST00000143700	Sppl2a	FALSE	FALSE	FALSE	TRUE	.	0	0	.	0	0	.	.	chr2	126919844	126920845
chr2	126923187	126924188	-1	ENSMUSG00000027366	ENSMUST00000125592	Sppl2a	FALSE	FALSE	FALSE	TRUE	.	0	0	.	0	0	.	.	chr2	126923187	126924188
chr2	126932734	126933735	-1	ENSMUSG00000027366	ENSMUST00000028844	Sppl2a	FALSE	TRUE	FALSE	FALSE	.	0	0	chr2	126933009	126933424	element_208	4	chr2	126932734	126933735
chr2	51934506	51935507	-1	ENSMUSG00000036249	ENSMUST00000102767	Rbm43	FALSE	FALSE	FALSE	TRUE	.	0	0	.	0	0	.	.	chr2	51934506	51935507
chr2	51934506	51935507	-1	ENSMUSG00000036249	ENSMUST00000102767	Rbm43	FALSE	FALSE	FALSE	TRUE	.	0	0	.	0	0	.	.	chr2	51934506	51935507
chr2	51934143	51935144	-1	ENSMUSG00000036249	ENSMUST00000165313	Rbm43	FALSE	FALSE	FALSE	TRUE	.	0	0	.	0	0	.	.	chr2	51934143	51935144
chr2	51932834	51933835	-1	ENSMUSG00000036249	ENSMUST00000126090	Rbm43	FALSE	FALSE	FALSE	TRUE	.	0	0	.	0	0	.	.	chr2	51932834	51933835
chr2	51934173	51935174	-1	ENSMUSG00000036249	ENSMUST00000132703	Rbm43	FALSE	FALSE	FALSE	TRUE	.	0	0	.	0	0	.	.	chr2	51934173	51935174
chr2	51926525	51927526	-1	ENSMUSG00000036249	ENSMUST00000152800	Rbm43	FALSE	FALSE	FALSE	TRUE	.	0	0	.	0	0	.	.	chr2	51926525	51927526
chr2	51934662	51935663	-1	ENSMUSG00000036249	ENSMUST00000102768	Rbm43	FALSE	FALSE	FALSE	TRUE	.	0	0	.	0	0	.	.	chr2	51934662	51935663
chr2	51934662	51935663	-1	ENSMUSG00000036249	ENSMUST00000102768	Rbm43	FALSE	FALSE	FALSE	TRUE	.	0	0	.	0	0	.	.	chr2	51934662	51935663
chr2	32816689	32817690	-1	ENSMUSG00000026797	ENSMUST00000113222	Stxbp1	FALSE	FALSE	FALSE	TRUE	.	0	0	.	0	0	.	.	chr2	32816689	32817690
chr2	32846705	32847706	-1	ENSMUSG00000026797	ENSMUST00000208840	Stxbp1	FALSE	FALSE	FALSE	TRUE	.	0	0	.	0	0	.	.	chr2	32846705	32847706
chr2	32846744	32847745	-1	ENSMUSG00000026797	ENSMUST00000050000	Stxbp1	FALSE	FALSE	FALSE	TRUE	.	0	0	.	0	0	.	.	chr2	32846744	32847745
chr2	32846701	32847702	-1	ENSMUSG00000026797	ENSMUST00000077458	Stxbp1	FALSE	FALSE	FALSE	TRUE	.	0	0	.	0	0	.	.	chr2	32846701	32847702
chr2	32817095	32818096	-1	ENSMUSG00000026797	ENSMUST00000192333	Stxbp1	FALSE	FALSE	FALSE	TRUE	.	0	0	.	0	0	.	.	chr2	32817095	32818096
chr2	51972993	51973994	-1	ENSMUSG00000026946	ENSMUST00000145656	Nmi	FALSE	FALSE	FALSE	TRUE	.	0	0	.	0	0	.	.	chr2	51972993	51973994
chr2	51952076	51953077	-1	ENSMUSG00000026946	ENSMUST00000142868	Nmi	FALSE	FALSE	FALSE	TRUE	.	0	0	.	0	0	.	.	chr2	51952076	51953077
chr2	51972469	51973470	-1	ENSMUSG00000026946	ENSMUST00000123521	Nmi	FALSE	FALSE	FALSE	TRUE	.	0	0	.	0	0	.	.	chr2	51972469	51973470
chr2	51972723	51973724	-1	ENSMUSG00000026946	ENSMUST00000028314	Nmi	FALSE	FALSE	FALSE	TRUE	.	0	0	.	0	0	.	.	chr2	51972723	51973724
chr2	51972503	51973504	-1	ENSMUSG00000026946	ENSMUST00000145481	Nmi	FALSE	FALSE	FALSE	TRUE	.	0	0	.	0	0	.	.	chr2	51972503	51973504
chr2	51972515	51973516	-1	ENSMUSG00000026946	ENSMUST00000112705	Nmi	FALSE	FALSE	FALSE	TRUE	.	0	0	.	0	0	.	.	chr2	51972515	51973516
chr2	173218422	173219423	-1	ENSMUSG00000027514	ENSMUST00000029018	Zbp1	FALSE	TRUE	FALSE	FALSE	.	0	0	chr2	173218772	173219151	element_221	3	chr2	173218422	173219423
chr2	173218409	173219410	-1	ENSMUSG00000027514	ENSMUST00000109116	Zbp1	FALSE	TRUE	FALSE	FALSE	.	0	0	chr2	173218772	173219151	element_221	3	chr2	173218409	173219410
chr2	173218396	173219397	-1	ENSMUSG00000027514	ENSMUST00000146802	Zbp1	FALSE	TRUE	FALSE	FALSE	.	0	0	chr2	173218772	173219151	element_221	3	chr2	173218396	173219397
chr2	126607140	126608141	-1	ENSMUSG00000027360	ENSMUST00000132382	Hdc	FALSE	FALSE	FALSE	TRUE	.	0	0	.	0	0	.	.	chr2	126607140	126608141
chr2	126618798	126619799	-1	ENSMUSG00000027360	ENSMUST00000148591	Hdc	FALSE	FALSE	FALSE	TRUE	.	0	0	.	0	0	.	.	chr2	126618798	126619799
chr2	126597760	126598761	-1	ENSMUSG00000027360	ENSMUST00000124396	Hdc	FALSE	FALSE	FALSE	TRUE	.	0	0	.	0	0	.	.	chr2	126597760	126598761
chr2	126618177	126619178	-1	ENSMUSG00000027360	ENSMUST00000028838	Hdc	FALSE	FALSE	FALSE	TRUE	.	0	0	.	0	0	.	.	chr2	126618177	126619178
chr2	126618160	126619161	-1	ENSMUSG00000027360	ENSMUST00000138752	Hdc	FALSE	FALSE	FALSE	TRUE	.	0	0	.	0	0	.	.	chr2	126618160	126619161
chr2	74578016	74579017	-1	ENSMUSG00000009207	ENSMUST00000130232	Lnpk	FALSE	FALSE	FALSE	TRUE	.	0	0	.	0	0	.	.	chr2	74578016	74579017
chr2	74578447	74579448	-1	ENSMUSG00000009207	ENSMUST00000064503	Lnpk	FALSE	FALSE	FALSE	TRUE	.	0	0	.	0	0	.	.	chr2	74578447	74579448
chr2	74578447	74579448	-1	ENSMUSG00000009207	ENSMUST00000111993	Lnpk	FALSE	FALSE	FALSE	TRUE	.	0	0	.	0	0	.	.	chr2	74578447	74579448
chr2	74578878	74579879	-1	ENSMUSG00000009207	ENSMUST00000130586	Lnpk	FALSE	FALSE	FALSE	TRUE	.	0	0	.	0	0	.	.	chr2	74578878	74579879
chr2	74578393	74579394	-1	ENSMUSG00000009207	ENSMUST00000134168	Lnpk	FALSE	FALSE	FALSE	TRUE	.	0	0	.	0	0	.	.	chr2	74578393	74579394
chr2	74532605	74533606	-1	ENSMUSG00000009207	ENSMUST00000127168	Lnpk	FALSE	FALSE	FALSE	TRUE	.	0	0	.	0	0	.	.	chr2	74532605	74533606
chr2	74578430	74579431	-1	ENSMUSG00000009207	ENSMUST00000134641	Lnpk	FALSE	FALSE	FALSE	TRUE	.	0	0	.	0	0	.	.	chr2	74578430	74579431
chr2	74577722	74578723	-1	ENSMUSG00000009207	ENSMUST00000102676	Lnpk	FALSE	FALSE	FALSE	TRUE	.	0	0	.	0	0	.	.	chr2	74577722	74578723
chr2	74578934	74579935	-1	ENSMUSG00000009207	ENSMUST00000134764	Lnpk	FALSE	FALSE	FALSE	TRUE	.	0	0	.	0	0	.	.	chr2	74578934	74579935
chr2	74554495	74555496	-1	ENSMUSG00000009207	ENSMUST00000155006	Lnpk	FALSE	FALSE	FALSE	TRUE	.	0	0	.	0	0	.	.	chr2	74554495	74555496
chr2	74578415	74579416	-1	ENSMUSG00000009207	ENSMUST00000154706	Lnpk	FALSE	FALSE	FALSE	TRUE	.	0	0	.	0	0	.	.	chr2	74578415	74579416
chr2	74578379	74579380	-1	ENSMUSG00000009207	ENSMUST00000145293	Lnpk	FALSE	FALSE	FALSE	TRUE	.	0	0	.	0	0	.	.	chr2	74578379	74579380
chr2	74551393	74552394	-1	ENSMUSG00000009207	ENSMUST00000145933	Lnpk	FALSE	FALSE	FALSE	TRUE	.	0	0	.	0	0	.	.	chr2	74551393	74552394
chr2	60705100	60706101	-1	ENSMUSG00000026971	ENSMUST00000147906	Itgb6	FALSE	FALSE	FALSE	TRUE	.	0	0	.	0	0	.	.	chr2	60705100	60706101
chr2	60673253	60674254	-1	ENSMUSG00000026971	ENSMUST00000151035	Itgb6	FALSE	FALSE	FALSE	TRUE	.	0	0	.	0	0	.	.	chr2	60673253	60674254
chr2	60705077	60706078	-1	ENSMUSG00000026971	ENSMUST00000142696	Itgb6	FALSE	FALSE	FALSE	TRUE	.	0	0	.	0	0	.	.	chr2	60705077	60706078
chr2	60722142	60723143	-1	ENSMUSG00000026971	ENSMUST00000028348	Itgb6	FALSE	FALSE	FALSE	TRUE	.	0	0	.	0	0	.	.	chr2	60722142	60723143
chr2	60673210	60674211	-1	ENSMUSG00000026971	ENSMUST00000059888	Itgb6	FALSE	FALSE	FALSE	TRUE	.	0	0	.	0	0	.	.	chr2	60673210	60674211
chr2	60722142	60723143	-1	ENSMUSG00000026971	ENSMUST00000112517	Itgb6	FALSE	FALSE	FALSE	TRUE	.	0	0	.	0	0	.	.	chr2	60722142	60723143
chr2	60673225	60674226	-1	ENSMUSG00000026971	ENSMUST00000154764	Itgb6	FALSE	FALSE	FALSE	TRUE	.	0	0	.	0	0	.	.	chr2	60673225	60674226
chr2	60673192	60674193	-1	ENSMUSG00000026971	ENSMUST00000133887	Itgb6	FALSE	FALSE	FALSE	TRUE	.	0	0	.	0	0	.	.	chr2	60673192	60674193
chr2	60673202	60674203	-1	ENSMUSG00000026971	ENSMUST00000145009	Itgb6	FALSE	FALSE	FALSE	TRUE	.	0	0	.	0	0	.	.	chr2	60673202	60674203
chr2	120154105	120155106	-1	ENSMUSG00000027293	ENSMUST00000028755	Ehd4	FALSE	FALSE	FALSE	TRUE	.	0	0	.	0	0	.	.	chr2	120154105	120155106
chr2	120129224	120130225	-1	ENSMUSG00000027293	ENSMUST00000150240	Ehd4	FALSE	FALSE	FALSE	TRUE	.	0	0	.	0	0	.	.	chr2	120129224	120130225
chr2	120137059	120138060	-1	ENSMUSG00000027293	ENSMUST00000152366	Ehd4	FALSE	FALSE	FALSE	TRUE	.	0	0	.	0	0	.	.	chr2	120137059	120138060
chr2	120153961	120154962	-1	ENSMUSG00000027293	ENSMUST00000148073	Ehd4	FALSE	FALSE	FALSE	TRUE	.	0	0	.	0	0	.	.	chr2	120153961	120154962
chr2	62645710	62646711	-1	ENSMUSG00000026896	ENSMUST00000028259	Ifih1	FALSE	TRUE	FALSE	FALSE	.	0	0	chr2	62645997	62646468	element_229	3	chr2	62645710	62646711
chr2	62638972	62639973	-1	ENSMUSG00000026896	ENSMUST00000176388	Ifih1	FALSE	FALSE	FALSE	TRUE	.	0	0	.	0	0	.	.	chr2	62638972	62639973
chr2	62645652	62646653	-1	ENSMUSG00000026896	ENSMUST00000112459	Ifih1	FALSE	TRUE	FALSE	FALSE	.	0	0	chr2	62645997	62646468	element_229	3	chr2	62645652	62646653
chr2	62645754	62646755	-1	ENSMUSG00000026896	ENSMUST00000176431	Ifih1	FALSE	TRUE	FALSE	FALSE	.	0	0	chr2	62645997	62646468	element_229	3	chr2	62645754	62646755
chr2	62645657	62646658	-1	ENSMUSG00000026896	ENSMUST00000175964	Ifih1	TRUE	TRUE	FALSE	FALSE	chr3	142620045	142620323	chr2	62645997	62646468	element_229	3	chr2	62645657	62646658
chr3	142620135	142621136	1	ENSMUSG00000028270	ENSMUST00000169572	Gbp2	TRUE	FALSE	FALSE	FALSE	chr3	142620045	142620323	.	0	0	.	.	chr3	142620135	142621136
chr3	142620102	142621103	1	ENSMUSG00000028270	ENSMUST00000165774	Gbp2	FALSE	FALSE	FALSE	TRUE	.	0	0	.	0	0	.	.	chr3	142620102	142621103
chr3	27316561	27317562	1	ENSMUSG00000039304	ENSMUST00000174840	Tnfsf10	FALSE	FALSE	FALSE	TRUE	.	0	0	.	0	0	.	.	chr3	27316561	27317562
chr3	27316528	27317529	1	ENSMUSG00000039304	ENSMUST00000046383	Tnfsf10	FALSE	FALSE	FALSE	TRUE	.	0	0	.	0	0	.	.	chr3	27316528	27317529
chr3	51223947	51224948	1	ENSMUSG00000023087	ENSMUST00000023849	Noct	FALSE	FALSE	FALSE	TRUE	.	0	0	.	0	0	.	.	chr3	51223947	51224948
chr3	51239706	51240707	1	ENSMUSG00000023087	ENSMUST00000144826	Noct	FALSE	FALSE	FALSE	TRUE	.	0	0	.	0	0	.	.	chr3	51239706	51240707
chr3	51242908	51243909	1	ENSMUSG00000023087	ENSMUST00000193018	Noct	FALSE	FALSE	FALSE	TRUE	.	0	0	.	0	0	.	.	chr3	51242908	51243909
chr3	51223970	51224971	1	ENSMUSG00000023087	ENSMUST00000167780	Noct	FALSE	FALSE	FALSE	TRUE	.	0	0	.	0	0	.	.	chr3	51223970	51224971
chr3	142594347	142595348	1	ENSMUSG00000040264	ENSMUST00000029936	Gbp2b	FALSE	FALSE	FALSE	TRUE	.	0	0	.	0	0	.	.	chr3	142594347	142595348
chr3	142529842	142530843	1	ENSMUSG00000040253	ENSMUST00000045097	Gbp7	FALSE	TRUE	FALSE	FALSE	.	0	0	chr3	142530040	142530486	element_244	1	chr3	142529842	142530843
chr3	142529842	142530843	1	ENSMUSG00000040253	ENSMUST00000171263	Gbp7	FALSE	TRUE	FALSE	FALSE	.	0	0	chr3	142530040	142530486	element_244	1	chr3	142529842	142530843
chr3	142560734	142561735	1	ENSMUSG00000028268	ENSMUST00000142060	Gbp3	FALSE	FALSE	FALSE	TRUE	.	0	0	.	0	0	.	.	chr3	142560734	142561735
chr3	142559675	142560676	1	ENSMUSG00000028268	ENSMUST00000142731	Gbp3	FALSE	TRUE	FALSE	FALSE	.	0	0	chr3	142559771	142560259	element_245	1	chr3	142559675	142560676
chr3	142559552	142560553	1	ENSMUSG00000028268	ENSMUST00000106222	Gbp3	FALSE	TRUE	FALSE	FALSE	.	0	0	chr3	142559771	142560259	element_245	1	chr3	142559552	142560553
chr3	142559645	142560646	1	ENSMUSG00000028268	ENSMUST00000029935	Gbp3	FALSE	TRUE	FALSE	FALSE	.	0	0	chr3	142559771	142560259	element_245	1	chr3	142559645	142560646
chr3	142559643	142560644	1	ENSMUSG00000028268	ENSMUST00000128609	Gbp3	FALSE	TRUE	FALSE	FALSE	.	0	0	chr3	142559771	142560259	element_245	1	chr3	142559643	142560644
chr3	142559526	142560527	1	ENSMUSG00000028268	ENSMUST00000199325	Gbp3	FALSE	TRUE	FALSE	FALSE	.	0	0	chr3	142559771	142560259	element_245	1	chr3	142559526	142560527
chr3	142559911	142560912	1	ENSMUSG00000028268	ENSMUST00000106221	Gbp3	FALSE	TRUE	FALSE	FALSE	.	0	0	chr3	142559771	142560259	element_245	1	chr3	142559911	142560912
chr3	142496442	142497443	1	ENSMUSG00000105504	ENSMUST00000197459	Gbp5	FALSE	FALSE	FALSE	TRUE	.	0	0	.	0	0	.	.	chr3	142496442	142497443
chr3	142496400	142497401	1	ENSMUSG00000105504	ENSMUST00000090127	Gbp5	FALSE	FALSE	FALSE	TRUE	.	0	0	.	0	0	.	.	chr3	142496400	142497401
chr3	142493478	142494479	1	ENSMUSG00000105504	ENSMUST00000198803	Gbp5	FALSE	FALSE	FALSE	TRUE	.	0	0	.	0	0	.	.	chr3	142493478	142494479
chr3	142496434	142497435	1	ENSMUSG00000105504	ENSMUST00000196255	Gbp5	FALSE	FALSE	FALSE	TRUE	.	0	0	.	0	0	.	.	chr3	142496434	142497435
chr3	142502296	142503297	1	ENSMUSG00000105504	ENSMUST00000199578	Gbp5	FALSE	FALSE	FALSE	TRUE	.	0	0	.	0	0	.	.	chr3	142502296	142503297
chr3	14641227	14642228	1	ENSMUSG00000027555	ENSMUST00000029071	Car13	FALSE	FALSE	FALSE	TRUE	.	0	0	.	0	0	.	.	chr3	14641227	14642228
chr3	87796594	87797595	1	ENSMUSG00000005640	ENSMUST00000107582	Insrr	FALSE	FALSE	FALSE	TRUE	.	0	0	.	0	0	.	.	chr3	87796594	87797595
chr3	87796465	87797466	1	ENSMUSG00000005640	ENSMUST00000166771	Insrr	FALSE	FALSE	FALSE	TRUE	.	0	0	.	0	0	.	.	chr3	87796465	87797466
chr3	87801443	87802444	1	ENSMUSG00000005640	ENSMUST00000166866	Insrr	FALSE	FALSE	FALSE	TRUE	.	0	0	.	0	0	.	.	chr3	87801443	87802444
chr3	87796451	87797452	1	ENSMUSG00000005640	ENSMUST00000029711	Insrr	FALSE	FALSE	FALSE	TRUE	.	0	0	.	0	0	.	.	chr3	87796451	87797452
chr3	89745145	89746146	1	ENSMUSG00000027951	ENSMUST00000131030	Adar	FALSE	FALSE	FALSE	TRUE	.	0	0	.	0	0	.	.	chr3	89745145	89746146
chr3	89730248	89731249	1	ENSMUSG00000027951	ENSMUST00000118341	Adar	FALSE	TRUE	FALSE	FALSE	.	0	0	chr3	89730543	89730987	element_256	1	chr3	89730248	89731249
chr3	89737086	89738087	1	ENSMUSG00000027951	ENSMUST00000150637	Adar	FALSE	FALSE	FALSE	TRUE	.	0	0	.	0	0	.	.	chr3	89737086	89738087
chr3	89714832	89715833	1	ENSMUSG00000027951	ENSMUST00000123691	Adar	FALSE	FALSE	FALSE	TRUE	.	0	0	.	0	0	.	.	chr3	89714832	89715833
chr3	89714522	89715523	1	ENSMUSG00000027951	ENSMUST00000098924	Adar	FALSE	FALSE	FALSE	TRUE	.	0	0	.	0	0	.	.	chr3	89714522	89715523
chr3	89730248	89731249	1	ENSMUSG00000027951	ENSMUST00000107405	Adar	FALSE	TRUE	FALSE	FALSE	.	0	0	chr3	89730543	89730987	element_256	1	chr3	89730248	89731249
chr3	89730248	89731249	1	ENSMUSG00000027951	ENSMUST00000121094	Adar	FALSE	TRUE	FALSE	FALSE	.	0	0	chr3	89730543	89730987	element_256	1	chr3	89730248	89731249
chr3	89730248	89731249	1	ENSMUSG00000027951	ENSMUST00000029563	Adar	FALSE	TRUE	FALSE	FALSE	.	0	0	chr3	89730543	89730987	element_256	1	chr3	89730248	89731249
chr3	89714522	89715523	1	ENSMUSG00000027951	ENSMUST00000197253	Adar	FALSE	FALSE	FALSE	TRUE	.	0	0	.	0	0	.	.	chr3	89714522	89715523
chr3	127789412	127790413	1	ENSMUSG00000046688	ENSMUST00000163775	Tifa	FALSE	FALSE	FALSE	TRUE	.	0	0	.	0	0	.	.	chr3	127789412	127790413
chr3	127790304	127791305	1	ENSMUSG00000046688	ENSMUST00000171621	Tifa	FALSE	FALSE	FALSE	TRUE	.	0	0	.	0	0	.	.	chr3	127790304	127791305
chr3	127789305	127790306	1	ENSMUSG00000046688	ENSMUST00000054483	Tifa	FALSE	FALSE	FALSE	TRUE	.	0	0	.	0	0	.	.	chr3	127789305	127790306
chr3	127790155	127791156	1	ENSMUSG00000046688	ENSMUST00000164447	Tifa	FALSE	FALSE	FALSE	TRUE	.	0	0	.	0	0	.	.	chr3	127790155	127791156
chr3	127789410	127790411	1	ENSMUSG00000046688	ENSMUST00000166778	Tifa	FALSE	FALSE	FALSE	TRUE	.	0	0	.	0	0	.	.	chr3	127789410	127790411
chr3	90451280	90452281	-1	ENSMUSG00000027931	ENSMUST00000152510	Npr1	FALSE	FALSE	FALSE	TRUE	.	0	0	.	0	0	.	.	chr3	90451280	90452281
chr3	90458438	90459439	-1	ENSMUSG00000027931	ENSMUST00000146991	Npr1	FALSE	FALSE	FALSE	TRUE	.	0	0	.	0	0	.	.	chr3	90458438	90459439
chr3	90465365	90466366	-1	ENSMUSG00000027931	ENSMUST00000029540	Npr1	FALSE	FALSE	FALSE	TRUE	.	0	0	.	0	0	.	.	chr3	90465365	90466366
chr3	90456975	90457976	-1	ENSMUSG00000027931	ENSMUST00000142243	Npr1	FALSE	FALSE	FALSE	TRUE	.	0	0	.	0	0	.	.	chr3	90456975	90457976
chr3	90460920	90461921	-1	ENSMUSG00000027931	ENSMUST00000124760	Npr1	FALSE	FALSE	FALSE	TRUE	.	0	0	.	0	0	.	.	chr3	90460920	90461921
chr3	116129187	116130188	-1	ENSMUSG00000027962	ENSMUST00000029574	Vcam1	FALSE	FALSE	FALSE	TRUE	.	0	0	.	0	0	.	.	chr3	116129187	116130188
chr3	116120214	116121215	-1	ENSMUSG00000027962	ENSMUST00000197031	Vcam1	FALSE	FALSE	FALSE	TRUE	.	0	0	.	0	0	.	.	chr3	116120214	116121215
chr3	116128956	116129957	-1	ENSMUSG00000027962	ENSMUST00000196449	Vcam1	FALSE	FALSE	FALSE	TRUE	.	0	0	.	0	0	.	.	chr3	116128956	116129957
chr3	116128427	116129428	-1	ENSMUSG00000027962	ENSMUST00000196309	Vcam1	FALSE	FALSE	FALSE	TRUE	.	0	0	.	0	0	.	.	chr3	116128427	116129428
chr3	32616024	32617025	-1	ENSMUSG00000027669	ENSMUST00000144292	Gnb4	FALSE	FALSE	FALSE	TRUE	.	0	0	.	0	0	.	.	chr3	32616024	32617025
chr3	32616084	32617085	-1	ENSMUSG00000027669	ENSMUST00000155737	Gnb4	FALSE	FALSE	FALSE	TRUE	.	0	0	.	0	0	.	.	chr3	32616084	32617085
chr3	32597677	32598678	-1	ENSMUSG00000027669	ENSMUST00000192116	Gnb4	FALSE	FALSE	FALSE	TRUE	.	0	0	.	0	0	.	.	chr3	32597677	32598678
chr3	32616016	32617017	-1	ENSMUSG00000027669	ENSMUST00000108234	Gnb4	FALSE	FALSE	FALSE	TRUE	.	0	0	.	0	0	.	.	chr3	32616016	32617017
chr3	32616028	32617029	-1	ENSMUSG00000027669	ENSMUST00000143588	Gnb4	FALSE	FALSE	FALSE	TRUE	.	0	0	.	0	0	.	.	chr3	32616028	32617029
chr3	32616024	32617025	-1	ENSMUSG00000027669	ENSMUST00000152901	Gnb4	FALSE	FALSE	FALSE	TRUE	.	0	0	.	0	0	.	.	chr3	32616024	32617025
chr3	32616021	32617022	-1	ENSMUSG00000027669	ENSMUST00000184130	Gnb4	FALSE	FALSE	FALSE	TRUE	.	0	0	.	0	0	.	.	chr3	32616021	32617022
chr3	32615978	32616979	-1	ENSMUSG00000027669	ENSMUST00000193050	Gnb4	FALSE	FALSE	FALSE	TRUE	.	0	0	.	0	0	.	.	chr3	32615978	32616979
chr3	36521312	36522313	-1	ENSMUSG00000085007	ENSMUST00000124606	Gm11549	FALSE	FALSE	FALSE	TRUE	.	0	0	.	0	0	.	.	chr3	36521312	36522313
chr3	94996495	94997496	-1	ENSMUSG00000084846	ENSMUST00000141787	A730011C13Rik	FALSE	FALSE	FALSE	TRUE	.	0	0	.	0	0	.	.	chr3	94996495	94997496
chr3	94996849	94997850	-1	ENSMUSG00000084846	ENSMUST00000135483	A730011C13Rik	FALSE	FALSE	FALSE	TRUE	.	0	0	.	0	0	.	.	chr3	94996849	94997850
chr3	127780026	127781027	-1	ENSMUSG00000028028	ENSMUST00000160586	Alpk1	FALSE	FALSE	FALSE	TRUE	.	0	0	.	0	0	.	.	chr3	127780026	127781027
chr3	127780012	127781013	-1	ENSMUSG00000028028	ENSMUST00000161239	Alpk1	FALSE	FALSE	FALSE	TRUE	.	0	0	.	0	0	.	.	chr3	127780012	127781013
chr3	127685839	127686840	-1	ENSMUSG00000028028	ENSMUST00000159720	Alpk1	FALSE	FALSE	FALSE	TRUE	.	0	0	.	0	0	.	.	chr3	127685839	127686840
chr3	127779989	127780990	-1	ENSMUSG00000028028	ENSMUST00000162859	Alpk1	FALSE	FALSE	FALSE	TRUE	.	0	0	.	0	0	.	.	chr3	127779989	127780990
chr3	127780026	127781027	-1	ENSMUSG00000028028	ENSMUST00000029662	Alpk1	FALSE	FALSE	FALSE	TRUE	.	0	0	.	0	0	.	.	chr3	127780026	127781027
chr3	127729070	127730071	-1	ENSMUSG00000028028	ENSMUST00000198955	Alpk1	FALSE	FALSE	FALSE	TRUE	.	0	0	.	0	0	.	.	chr3	127729070	127730071
chr3	7613259	7614260	-1	ENSMUSG00000040329	ENSMUST00000192202	Il7	FALSE	FALSE	FALSE	TRUE	.	0	0	.	0	0	.	.	chr3	7613259	7614260
chr3	7613226	7614227	-1	ENSMUSG00000040329	ENSMUST00000194279	Il7	FALSE	FALSE	FALSE	TRUE	.	0	0	.	0	0	.	.	chr3	7613226	7614227
chr3	7605363	7606364	-1	ENSMUSG00000040329	ENSMUST00000168269	Il7	FALSE	FALSE	FALSE	TRUE	.	0	0	.	0	0	.	.	chr3	7605363	7606364
chr3	7612392	7613393	-1	ENSMUSG00000040329	ENSMUST00000194184	Il7	FALSE	FALSE	FALSE	TRUE	.	0	0	.	0	0	.	.	chr3	7612392	7613393
chr3	7613240	7614241	-1	ENSMUSG00000040329	ENSMUST00000191681	Il7	FALSE	FALSE	FALSE	TRUE	.	0	0	.	0	0	.	.	chr3	7613240	7614241
chr3	137955366	137956367	-1	ENSMUSG00000028159	ENSMUST00000184222	Dapp1	FALSE	FALSE	FALSE	TRUE	.	0	0	.	0	0	.	.	chr3	137955366	137956367
chr3	137954212	137955213	-1	ENSMUSG00000028159	ENSMUST00000124827	Dapp1	FALSE	FALSE	FALSE	TRUE	.	0	0	.	0	0	.	.	chr3	137954212	137955213
chr3	137981035	137982036	-1	ENSMUSG00000028159	ENSMUST00000136613	Dapp1	FALSE	FALSE	FALSE	TRUE	.	0	0	.	0	0	.	.	chr3	137981035	137982036
chr3	137981029	137982030	-1	ENSMUSG00000028159	ENSMUST00000154716	Dapp1	FALSE	FALSE	FALSE	TRUE	.	0	0	.	0	0	.	.	chr3	137981029	137982030
chr3	137981035	137982036	-1	ENSMUSG00000028159	ENSMUST00000199541	Dapp1	FALSE	FALSE	FALSE	TRUE	.	0	0	.	0	0	.	.	chr3	137981035	137982036
chr3	137954212	137955213	-1	ENSMUSG00000028159	ENSMUST00000200596	Dapp1	FALSE	FALSE	FALSE	TRUE	.	0	0	.	0	0	.	.	chr3	137954212	137955213
chr3	137981044	137982045	-1	ENSMUSG00000028159	ENSMUST00000029806	Dapp1	FALSE	FALSE	FALSE	TRUE	.	0	0	.	0	0	.	.	chr3	137981044	137982045
chr3	151749402	151750403	-1	ENSMUSG00000028037	ENSMUST00000127733	Ifi44	FALSE	TRUE	FALSE	FALSE	.	0	0	chr3	151749708	151750117	element_248	3	chr3	151749402	151750403
chr3	151749381	151750382	-1	ENSMUSG00000028037	ENSMUST00000149919	Ifi44	FALSE	TRUE	FALSE	FALSE	.	0	0	chr3	151749708	151750117	element_248	3	chr3	151749381	151750382
chr3	151749446	151750447	-1	ENSMUSG00000028037	ENSMUST00000133888	Ifi44	FALSE	TRUE	FALSE	FALSE	.	0	0	chr3	151749708	151750117	element_248	3	chr3	151749446	151750447
chr3	151749459	151750460	-1	ENSMUSG00000028037	ENSMUST00000029671	Ifi44	FALSE	TRUE	FALSE	FALSE	.	0	0	chr3	151749708	151750117	element_248	3	chr3	151749459	151750460
chr3	151762391	151763392	-1	ENSMUSG00000039146	ENSMUST00000046739	Ifi44l	FALSE	FALSE	FALSE	TRUE	.	0	0	.	0	0	.	.	chr3	151762391	151763392
chr3	83841266	83842267	-1	ENSMUSG00000027995	ENSMUST00000029623	Tlr2	FALSE	FALSE	FALSE	TRUE	.	0	0	.	0	0	.	.	chr3	83841266	83842267
chr3	104818062	104819063	-1	ENSMUSG00000002227	ENSMUST00000166979	Mov10	FALSE	TRUE	FALSE	FALSE	.	0	0	chr3	104817815	104818316	element_239	4	chr3	104818062	104819063
chr3	104818062	104819063	-1	ENSMUSG00000002227	ENSMUST00000106774	Mov10	FALSE	TRUE	FALSE	FALSE	.	0	0	chr3	104817815	104818316	element_239	4	chr3	104818062	104819063
chr3	104817804	104818805	-1	ENSMUSG00000002227	ENSMUST00000168015	Mov10	FALSE	TRUE	FALSE	FALSE	.	0	0	chr3	104817815	104818316	element_239	4	chr3	104817804	104818805
chr3	104817800	104818801	-1	ENSMUSG00000002227	ENSMUST00000145414	Mov10	FALSE	TRUE	FALSE	FALSE	.	0	0	chr3	104817815	104818316	element_239	4	chr3	104817800	104818801
chr3	104816853	104817854	-1	ENSMUSG00000002227	ENSMUST00000196161	Mov10	FALSE	TRUE	FALSE	FALSE	.	0	0	chr3	104817815	104818316	element_239	4	chr3	104816853	104817854
chr3	104817741	104818742	-1	ENSMUSG00000002227	ENSMUST00000002297	Mov10	FALSE	TRUE	FALSE	FALSE	.	0	0	chr3	104817815	104818316	element_239	4	chr3	104817741	104818742
chr3	104818062	104819063	-1	ENSMUSG00000002227	ENSMUST00000136148	Mov10	FALSE	TRUE	FALSE	FALSE	.	0	0	chr3	104817815	104818316	element_239	4	chr3	104818062	104819063
chr3	104817615	104818616	-1	ENSMUSG00000002227	ENSMUST00000196211	Mov10	FALSE	TRUE	FALSE	FALSE	.	0	0	chr3	104817815	104818316	element_239	4	chr3	104817615	104818616
chr3	104818062	104819063	-1	ENSMUSG00000002227	ENSMUST00000106775	Mov10	FALSE	TRUE	FALSE	FALSE	.	0	0	chr3	104817815	104818316	element_239	4	chr3	104818062	104819063
chr4	156202804	156203805	1	ENSMUSG00000078349	ENSMUST00000105140	AW011738	FALSE	FALSE	FALSE	TRUE	.	0	0	.	0	0	.	.	chr4	156202804	156203805
chr4	45989663	45990664	1	ENSMUSG00000035517	ENSMUST00000140270	Tdrd7	FALSE	FALSE	FALSE	TRUE	.	0	0	.	0	0	.	.	chr4	45989663	45990664
chr4	46025601	46026602	1	ENSMUSG00000035517	ENSMUST00000155936	Tdrd7	FALSE	FALSE	FALSE	TRUE	.	0	0	.	0	0	.	.	chr4	46025601	46026602
chr4	45971733	45972734	1	ENSMUSG00000035517	ENSMUST00000102929	Tdrd7	FALSE	TRUE	FALSE	FALSE	.	0	0	chr4	45972080	45972625	element_277	4	chr4	45971733	45972734
chr4	45972334	45973335	1	ENSMUSG00000035517	ENSMUST00000151422	Tdrd7	FALSE	TRUE	FALSE	FALSE	.	0	0	chr4	45972080	45972625	element_277	4	chr4	45972334	45973335
chr4	45964834	45965835	1	ENSMUSG00000035517	ENSMUST00000107777	Tdrd7	FALSE	FALSE	FALSE	TRUE	.	0	0	.	0	0	.	.	chr4	45964834	45965835
chr4	129058314	129059315	1	ENSMUSG00000028793	ENSMUST00000097874	Rnf19b	FALSE	FALSE	FALSE	TRUE	.	0	0	.	0	0	.	.	chr4	129058314	129059315
chr4	129057771	129058772	1	ENSMUSG00000028793	ENSMUST00000168461	Rnf19b	FALSE	FALSE	FALSE	TRUE	.	0	0	.	0	0	.	.	chr4	129057771	129058772
chr4	129078471	129079472	1	ENSMUSG00000028793	ENSMUST00000130803	Rnf19b	FALSE	FALSE	FALSE	TRUE	.	0	0	.	0	0	.	.	chr4	129078471	129079472
chr4	129057771	129058772	1	ENSMUSG00000028793	ENSMUST00000030584	Rnf19b	FALSE	FALSE	FALSE	TRUE	.	0	0	.	0	0	.	.	chr4	129057771	129058772
chr4	129083385	129084386	1	ENSMUSG00000028793	ENSMUST00000147238	Rnf19b	FALSE	FALSE	FALSE	TRUE	.	0	0	.	0	0	.	.	chr4	129083385	129084386
chr4	129057909	129058910	1	ENSMUSG00000028793	ENSMUST00000152565	Rnf19b	FALSE	FALSE	FALSE	TRUE	.	0	0	.	0	0	.	.	chr4	129057909	129058910
chr4	108554952	108555953	1	ENSMUSG00000034610	ENSMUST00000145590	Zcchc11	FALSE	FALSE	FALSE	TRUE	.	0	0	.	0	0	.	.	chr4	108554952	108555953
chr4	108458926	108459927	1	ENSMUSG00000034610	ENSMUST00000043368	Zcchc11	FALSE	FALSE	FALSE	TRUE	.	0	0	.	0	0	.	.	chr4	108458926	108459927
chr4	108555236	108556237	1	ENSMUSG00000034610	ENSMUST00000128042	Zcchc11	FALSE	FALSE	FALSE	TRUE	.	0	0	.	0	0	.	.	chr4	108555236	108556237
chr4	108541918	108542919	1	ENSMUSG00000034610	ENSMUST00000138088	Zcchc11	FALSE	FALSE	FALSE	TRUE	.	0	0	.	0	0	.	.	chr4	108541918	108542919
chr4	108548585	108549586	1	ENSMUSG00000034610	ENSMUST00000127602	Zcchc11	FALSE	FALSE	FALSE	TRUE	.	0	0	.	0	0	.	.	chr4	108548585	108549586
chr4	108458926	108459927	1	ENSMUSG00000034610	ENSMUST00000106673	Zcchc11	FALSE	FALSE	FALSE	TRUE	.	0	0	.	0	0	.	.	chr4	108458926	108459927
chr4	108541865	108542866	1	ENSMUSG00000034610	ENSMUST00000153916	Zcchc11	FALSE	FALSE	FALSE	TRUE	.	0	0	.	0	0	.	.	chr4	108541865	108542866
chr4	108541766	108542767	1	ENSMUSG00000034610	ENSMUST00000151349	Zcchc11	FALSE	FALSE	FALSE	TRUE	.	0	0	.	0	0	.	.	chr4	108541766	108542767
chr4	108459510	108460511	1	ENSMUSG00000034610	ENSMUST00000097925	Zcchc11	FALSE	FALSE	FALSE	TRUE	.	0	0	.	0	0	.	.	chr4	108459510	108460511
chr4	108525974	108526975	1	ENSMUSG00000034610	ENSMUST00000138809	Zcchc11	FALSE	FALSE	FALSE	TRUE	.	0	0	.	0	0	.	.	chr4	108525974	108526975
chr4	108478581	108479582	1	ENSMUSG00000034610	ENSMUST00000155068	Zcchc11	FALSE	FALSE	FALSE	TRUE	.	0	0	.	0	0	.	.	chr4	108478581	108479582
chr4	45798621	45799622	1	ENSMUSG00000035561	ENSMUST00000172750	Aldh1b1	FALSE	FALSE	FALSE	TRUE	.	0	0	.	0	0	.	.	chr4	45798621	45799622
chr4	45798522	45799523	1	ENSMUSG00000035561	ENSMUST00000044384	Aldh1b1	FALSE	FALSE	FALSE	TRUE	.	0	0	.	0	0	.	.	chr4	45798522	45799523
chr4	124656307	124657308	1	ENSMUSG00000090125	ENSMUST00000053491	Pou3f1	FALSE	FALSE	FALSE	TRUE	.	0	0	.	0	0	.	.	chr4	124656307	124657308
chr4	11703957	11704958	1	ENSMUSG00000028214	ENSMUST00000108304	Gem	FALSE	FALSE	FALSE	TRUE	.	0	0	.	0	0	.	.	chr4	11703957	11704958
chr4	11705307	11706308	1	ENSMUSG00000028214	ENSMUST00000029868	Gem	FALSE	FALSE	FALSE	TRUE	.	0	0	.	0	0	.	.	chr4	11705307	11706308
chr4	3677630	3678631	1	ENSMUSG00000042228	ENSMUST00000145083	Lyn	FALSE	FALSE	FALSE	TRUE	.	0	0	.	0	0	.	.	chr4	3677630	3678631
chr4	3677615	3678616	1	ENSMUSG00000042228	ENSMUST00000041377	Lyn	FALSE	FALSE	FALSE	TRUE	.	0	0	.	0	0	.	.	chr4	3677615	3678616
chr4	3755957	3756958	1	ENSMUSG00000042228	ENSMUST00000137943	Lyn	FALSE	FALSE	FALSE	TRUE	.	0	0	.	0	0	.	.	chr4	3755957	3756958
chr4	3677627	3678628	1	ENSMUSG00000042228	ENSMUST00000103010	Lyn	FALSE	FALSE	FALSE	TRUE	.	0	0	.	0	0	.	.	chr4	3677627	3678628
chr4	130816345	130817346	1	ENSMUSG00000025743	ENSMUST00000140623	Sdc3	FALSE	FALSE	FALSE	TRUE	.	0	0	.	0	0	.	.	chr4	130816345	130817346
chr4	130792037	130793038	1	ENSMUSG00000025743	ENSMUST00000070478	Sdc3	FALSE	FALSE	FALSE	TRUE	.	0	0	.	0	0	.	.	chr4	130792037	130793038
chr4	130792204	130793205	1	ENSMUSG00000025743	ENSMUST00000146093	Sdc3	FALSE	FALSE	FALSE	TRUE	.	0	0	.	0	0	.	.	chr4	130792204	130793205
chr4	130811438	130812439	1	ENSMUSG00000025743	ENSMUST00000152591	Sdc3	FALSE	FALSE	FALSE	TRUE	.	0	0	.	0	0	.	.	chr4	130811438	130812439
chr4	130813804	130814805	1	ENSMUSG00000025743	ENSMUST00000141297	Sdc3	FALSE	FALSE	FALSE	TRUE	.	0	0	.	0	0	.	.	chr4	130813804	130814805
chr4	154927576	154928577	-1	ENSMUSG00000042333	ENSMUST00000219534	Tnfrsf14	FALSE	FALSE	FALSE	TRUE	.	0	0	.	0	0	.	.	chr4	154927576	154928577
chr4	154928062	154929063	-1	ENSMUSG00000042333	ENSMUST00000145296	Tnfrsf14	FALSE	FALSE	FALSE	TRUE	.	0	0	.	0	0	.	.	chr4	154928062	154929063
chr4	154927701	154928702	-1	ENSMUSG00000042333	ENSMUST00000123514	Tnfrsf14	FALSE	FALSE	FALSE	TRUE	.	0	0	.	0	0	.	.	chr4	154927701	154928702
chr4	154928051	154929052	-1	ENSMUSG00000042333	ENSMUST00000152687	Tnfrsf14	FALSE	FALSE	FALSE	TRUE	.	0	0	.	0	0	.	.	chr4	154928051	154929052
chr4	154928051	154929052	-1	ENSMUSG00000042333	ENSMUST00000137803	Tnfrsf14	FALSE	FALSE	FALSE	TRUE	.	0	0	.	0	0	.	.	chr4	154928051	154929052
chr4	156200317	156201318	-1	ENSMUSG00000035692	ENSMUST00000085425	Isg15	FALSE	TRUE	FALSE	FALSE	.	0	0	chr4	156200724	156201121	element_273	1	chr4	156200317	156201318
chr4	134237838	134238839	-1	ENSMUSG00000028841	ENSMUST00000144504	Cnksr1	FALSE	FALSE	FALSE	TRUE	.	0	0	.	0	0	.	.	chr4	134237838	134238839
chr4	134235438	134236439	-1	ENSMUSG00000028841	ENSMUST00000124181	Cnksr1	FALSE	FALSE	FALSE	TRUE	.	0	0	.	0	0	.	.	chr4	134235438	134236439
chr4	134232653	134233654	-1	ENSMUSG00000028841	ENSMUST00000145998	Cnksr1	FALSE	FALSE	FALSE	TRUE	.	0	0	.	0	0	.	.	chr4	134232653	134233654
chr4	134229934	134230935	-1	ENSMUSG00000028841	ENSMUST00000146283	Cnksr1	FALSE	FALSE	FALSE	TRUE	.	0	0	.	0	0	.	.	chr4	134229934	134230935
chr4	134237898	134238899	-1	ENSMUSG00000028841	ENSMUST00000030645	Cnksr1	FALSE	FALSE	FALSE	TRUE	.	0	0	.	0	0	.	.	chr4	134237898	134238899
chr4	46533941	46534942	-1	ENSMUSG00000039853	ENSMUST00000142502	Trim14	FALSE	FALSE	FALSE	TRUE	.	0	0	.	0	0	.	.	chr4	46533941	46534942
chr4	46534103	46535104	-1	ENSMUSG00000039853	ENSMUST00000142606	Trim14	FALSE	FALSE	FALSE	TRUE	.	0	0	.	0	0	.	.	chr4	46534103	46535104
chr4	46533913	46534914	-1	ENSMUSG00000039853	ENSMUST00000136978	Trim14	FALSE	FALSE	FALSE	TRUE	.	0	0	.	0	0	.	.	chr4	46533913	46534914
chr4	46535613	46536614	-1	ENSMUSG00000039853	ENSMUST00000102924	Trim14	FALSE	FALSE	FALSE	TRUE	.	0	0	.	0	0	.	.	chr4	46535613	46536614
chr4	46535640	46536641	-1	ENSMUSG00000039853	ENSMUST00000046897	Trim14	FALSE	FALSE	FALSE	TRUE	.	0	0	.	0	0	.	.	chr4	46535640	46536641
chr4	46535621	46536622	-1	ENSMUSG00000039853	ENSMUST00000184112	Trim14	FALSE	FALSE	FALSE	TRUE	.	0	0	.	0	0	.	.	chr4	46535621	46536622
chr4	133321729	133322730	-1	ENSMUSG00000037622	ENSMUST00000145426	Wdtc1	FALSE	FALSE	FALSE	TRUE	.	0	0	.	0	0	.	.	chr4	133321729	133322730
chr4	133338823	133339824	-1	ENSMUSG00000037622	ENSMUST00000043305	Wdtc1	FALSE	FALSE	FALSE	TRUE	.	0	0	.	0	0	.	.	chr4	133338823	133339824
chr4	133352377	133353378	-1	ENSMUSG00000037622	ENSMUST00000135929	Wdtc1	FALSE	FALSE	FALSE	TRUE	.	0	0	.	0	0	.	.	chr4	133352377	133353378
chr4	133338770	133339771	-1	ENSMUSG00000037622	ENSMUST00000105906	Wdtc1	FALSE	FALSE	FALSE	TRUE	.	0	0	.	0	0	.	.	chr4	133338770	133339771
chr4	133352980	133353981	-1	ENSMUSG00000037622	ENSMUST00000140976	Wdtc1	FALSE	FALSE	FALSE	TRUE	.	0	0	.	0	0	.	.	chr4	133352980	133353981
chr4	145246369	145247370	-1	ENSMUSG00000028599	ENSMUST00000030336	Tnfrsf1b	FALSE	FALSE	FALSE	TRUE	.	0	0	.	0	0	.	.	chr4	145246369	145247370
chr4	145246369	145247370	-1	ENSMUSG00000028599	ENSMUST00000143055	Tnfrsf1b	FALSE	FALSE	FALSE	TRUE	.	0	0	.	0	0	.	.	chr4	145246369	145247370
chr4	129555347	129556348	-1	ENSMUSG00000000409	ENSMUST00000132030	Lck	FALSE	FALSE	FALSE	TRUE	.	0	0	.	0	0	.	.	chr4	129555347	129556348
chr4	129573140	129574141	-1	ENSMUSG00000000409	ENSMUST00000102596	Lck	FALSE	FALSE	FALSE	TRUE	.	0	0	.	0	0	.	.	chr4	129573140	129574141
chr4	129557871	129558872	-1	ENSMUSG00000000409	ENSMUST00000167288	Lck	FALSE	FALSE	FALSE	TRUE	.	0	0	.	0	0	.	.	chr4	129557871	129558872
chr4	129555958	129556959	-1	ENSMUSG00000000409	ENSMUST00000123640	Lck	FALSE	FALSE	FALSE	TRUE	.	0	0	.	0	0	.	.	chr4	129555958	129556959
chr4	129557890	129558891	-1	ENSMUSG00000000409	ENSMUST00000067240	Lck	FALSE	FALSE	FALSE	TRUE	.	0	0	.	0	0	.	.	chr4	129557890	129558891
chr4	129557871	129558872	-1	ENSMUSG00000000409	ENSMUST00000134336	Lck	FALSE	FALSE	FALSE	TRUE	.	0	0	.	0	0	.	.	chr4	129557871	129558872
chr4	129557586	129558587	-1	ENSMUSG00000000409	ENSMUST00000139957	Lck	FALSE	FALSE	FALSE	TRUE	.	0	0	.	0	0	.	.	chr4	129557586	129558587
chr4	129555730	129556731	-1	ENSMUSG00000000409	ENSMUST00000127943	Lck	FALSE	FALSE	FALSE	TRUE	.	0	0	.	0	0	.	.	chr4	129555730	129556731
chr4	19569582	19570583	-1	ENSMUSG00000028228	ENSMUST00000108254	Cpne3	FALSE	FALSE	FALSE	TRUE	.	0	0	.	0	0	.	.	chr4	19569582	19570583
chr4	19569607	19570608	-1	ENSMUSG00000028228	ENSMUST00000029885	Cpne3	FALSE	FALSE	FALSE	TRUE	.	0	0	.	0	0	.	.	chr4	19569607	19570608
chr4	19543177	19544178	-1	ENSMUSG00000028228	ENSMUST00000134025	Cpne3	FALSE	FALSE	FALSE	TRUE	.	0	0	.	0	0	.	.	chr4	19543177	19544178
chr4	3937892	3938893	-1	ENSMUSG00000003282	ENSMUST00000147035	Plag1	FALSE	FALSE	FALSE	TRUE	.	0	0	.	0	0	.	.	chr4	3937892	3938893
chr4	3937904	3938905	-1	ENSMUSG00000003282	ENSMUST00000137439	Plag1	FALSE	FALSE	FALSE	TRUE	.	0	0	.	0	0	.	.	chr4	3937904	3938905
chr4	3937922	3938923	-1	ENSMUSG00000003282	ENSMUST00000151543	Plag1	FALSE	FALSE	FALSE	TRUE	.	0	0	.	0	0	.	.	chr4	3937922	3938923
chr4	3937881	3938882	-1	ENSMUSG00000003282	ENSMUST00000003369	Plag1	FALSE	FALSE	FALSE	TRUE	.	0	0	.	0	0	.	.	chr4	3937881	3938882
chr4	149921970	149922971	-1	ENSMUSG00000039911	ENSMUST00000167342	Spsb1	FALSE	FALSE	FALSE	TRUE	.	0	0	.	0	0	.	.	chr4	149921970	149922971
chr4	149954542	149955543	-1	ENSMUSG00000039911	ENSMUST00000038562	Spsb1	FALSE	FALSE	FALSE	TRUE	.	0	0	.	0	0	.	.	chr4	149954542	149955543
chr4	149909315	149910316	-1	ENSMUSG00000039911	ENSMUST00000105685	Spsb1	FALSE	FALSE	FALSE	TRUE	.	0	0	.	0	0	.	.	chr4	149909315	149910316
chr4	149945597	149946598	-1	ENSMUSG00000039911	ENSMUST00000149743	Spsb1	FALSE	FALSE	FALSE	TRUE	.	0	0	.	0	0	.	.	chr4	149945597	149946598
chr4	149953303	149954304	-1	ENSMUSG00000039911	ENSMUST00000156897	Spsb1	FALSE	FALSE	FALSE	TRUE	.	0	0	.	0	0	.	.	chr4	149953303	149954304
chr4	149906788	149907789	-1	ENSMUSG00000039911	ENSMUST00000105684	Spsb1	FALSE	FALSE	FALSE	TRUE	.	0	0	.	0	0	.	.	chr4	149906788	149907789
chr4	149942117	149943118	-1	ENSMUSG00000039911	ENSMUST00000125135	Spsb1	FALSE	FALSE	FALSE	TRUE	.	0	0	.	0	0	.	.	chr4	149942117	149943118
chr4	149954542	149955543	-1	ENSMUSG00000039911	ENSMUST00000156451	Spsb1	FALSE	FALSE	FALSE	TRUE	.	0	0	.	0	0	.	.	chr4	149954542	149955543
chr4	149954530	149955531	-1	ENSMUSG00000039911	ENSMUST00000135896	Spsb1	FALSE	FALSE	FALSE	TRUE	.	0	0	.	0	0	.	.	chr4	149954530	149955531
chr4	149931055	149932056	-1	ENSMUSG00000039911	ENSMUST00000149360	Spsb1	FALSE	FALSE	FALSE	TRUE	.	0	0	.	0	0	.	.	chr4	149931055	149932056
chr4	44709907	44710908	-1	ENSMUSG00000014030	ENSMUST00000174319	Pax5	FALSE	FALSE	FALSE	TRUE	.	0	0	.	0	0	.	.	chr4	44709907	44710908
chr4	44709917	44710918	-1	ENSMUSG00000014030	ENSMUST00000102932	Pax5	FALSE	FALSE	FALSE	TRUE	.	0	0	.	0	0	.	.	chr4	44709917	44710918
chr4	44709907	44710908	-1	ENSMUSG00000014030	ENSMUST00000173821	Pax5	FALSE	FALSE	FALSE	TRUE	.	0	0	.	0	0	.	.	chr4	44709907	44710908
chr4	44709907	44710908	-1	ENSMUSG00000014030	ENSMUST00000173733	Pax5	FALSE	FALSE	FALSE	TRUE	.	0	0	.	0	0	.	.	chr4	44709907	44710908
chr4	44709917	44710918	-1	ENSMUSG00000014030	ENSMUST00000107826	Pax5	FALSE	FALSE	FALSE	TRUE	.	0	0	.	0	0	.	.	chr4	44709917	44710918
chr4	44709986	44710987	-1	ENSMUSG00000014030	ENSMUST00000014174	Pax5	FALSE	FALSE	FALSE	TRUE	.	0	0	.	0	0	.	.	chr4	44709986	44710987
chr4	44702912	44703913	-1	ENSMUSG00000014030	ENSMUST00000191036	Pax5	FALSE	FALSE	FALSE	TRUE	.	0	0	.	0	0	.	.	chr4	44702912	44703913
chr4	44709907	44710908	-1	ENSMUSG00000014030	ENSMUST00000134968	Pax5	FALSE	FALSE	FALSE	TRUE	.	0	0	.	0	0	.	.	chr4	44709907	44710908
chr4	44709917	44710918	-1	ENSMUSG00000014030	ENSMUST00000107825	Pax5	FALSE	FALSE	FALSE	TRUE	.	0	0	.	0	0	.	.	chr4	44709917	44710918
chr4	44709907	44710908	-1	ENSMUSG00000014030	ENSMUST00000165417	Pax5	FALSE	FALSE	FALSE	TRUE	.	0	0	.	0	0	.	.	chr4	44709907	44710908
chr4	44709907	44710908	-1	ENSMUSG00000014030	ENSMUST00000172866	Pax5	FALSE	FALSE	FALSE	TRUE	.	0	0	.	0	0	.	.	chr4	44709907	44710908
chr4	44709917	44710918	-1	ENSMUSG00000014030	ENSMUST00000143235	Pax5	FALSE	FALSE	FALSE	TRUE	.	0	0	.	0	0	.	.	chr4	44709917	44710918
chr4	44702912	44703913	-1	ENSMUSG00000014030	ENSMUST00000186542	Pax5	FALSE	FALSE	FALSE	TRUE	.	0	0	.	0	0	.	.	chr4	44702912	44703913
chr4	44683314	44684315	-1	ENSMUSG00000014030	ENSMUST00000172949	Pax5	FALSE	FALSE	FALSE	TRUE	.	0	0	.	0	0	.	.	chr4	44683314	44684315
chr4	44703505	44704506	-1	ENSMUSG00000014030	ENSMUST00000146335	Pax5	FALSE	FALSE	FALSE	TRUE	.	0	0	.	0	0	.	.	chr4	44703505	44704506
chr4	44709917	44710918	-1	ENSMUSG00000014030	ENSMUST00000107827	Pax5	FALSE	FALSE	FALSE	TRUE	.	0	0	.	0	0	.	.	chr4	44709917	44710918
chr4	44645222	44646223	-1	ENSMUSG00000014030	ENSMUST00000194075	Pax5	FALSE	FALSE	FALSE	TRUE	.	0	0	.	0	0	.	.	chr4	44645222	44646223
chr4	44702912	44703913	-1	ENSMUSG00000014030	ENSMUST00000174761	Pax5	FALSE	FALSE	FALSE	TRUE	.	0	0	.	0	0	.	.	chr4	44702912	44703913
chr4	44702912	44703913	-1	ENSMUSG00000014030	ENSMUST00000187197	Pax5	FALSE	FALSE	FALSE	TRUE	.	0	0	.	0	0	.	.	chr4	44702912	44703913
chr4	44709907	44710908	-1	ENSMUSG00000014030	ENSMUST00000174242	Pax5	FALSE	FALSE	FALSE	TRUE	.	0	0	.	0	0	.	.	chr4	44709907	44710908
chr4	12089519	12090520	-1	ENSMUSG00000049488	ENSMUST00000108293	Tmem67	FALSE	FALSE	FALSE	TRUE	.	0	0	.	0	0	.	.	chr4	12089519	12090520
chr4	12087426	12088427	-1	ENSMUSG00000049488	ENSMUST00000147746	Tmem67	FALSE	FALSE	FALSE	TRUE	.	0	0	.	0	0	.	.	chr4	12087426	12088427
chr4	12087456	12088457	-1	ENSMUSG00000049488	ENSMUST00000050686	Tmem67	FALSE	FALSE	FALSE	TRUE	.	0	0	.	0	0	.	.	chr4	12087456	12088457
chr4	12087506	12088507	-1	ENSMUSG00000049488	ENSMUST00000146140	Tmem67	FALSE	FALSE	FALSE	TRUE	.	0	0	.	0	0	.	.	chr4	12087506	12088507
chr4	12087437	12088438	-1	ENSMUSG00000049488	ENSMUST00000131145	Tmem67	FALSE	FALSE	FALSE	TRUE	.	0	0	.	0	0	.	.	chr4	12087437	12088438
chr4	12087431	12088432	-1	ENSMUSG00000049488	ENSMUST00000151859	Tmem67	FALSE	FALSE	FALSE	TRUE	.	0	0	.	0	0	.	.	chr4	12087431	12088432
chr4	40239324	40240325	-1	ENSMUSG00000040296	ENSMUST00000149539	Ddx58	FALSE	TRUE	FALSE	FALSE	.	0	0	chr4	40239527	40240088	element_276	4	chr4	40239324	40240325
chr4	40239327	40240328	-1	ENSMUSG00000040296	ENSMUST00000037907	Ddx58	FALSE	TRUE	FALSE	FALSE	.	0	0	chr4	40239527	40240088	element_276	4	chr4	40239327	40240328
chr4	40239221	40240222	-1	ENSMUSG00000040296	ENSMUST00000127026	Ddx58	FALSE	TRUE	FALSE	FALSE	.	0	0	chr4	40239527	40240088	element_276	4	chr4	40239221	40240222
chr4	40220099	40221100	-1	ENSMUSG00000040296	ENSMUST00000137903	Ddx58	FALSE	FALSE	FALSE	TRUE	.	0	0	.	0	0	.	.	chr4	40220099	40221100
chr4	40208042	40209043	-1	ENSMUSG00000040296	ENSMUST00000136435	Ddx58	FALSE	FALSE	FALSE	TRUE	.	0	0	.	0	0	.	.	chr4	40208042	40209043
chr4	40239199	40240200	-1	ENSMUSG00000040296	ENSMUST00000142055	Ddx58	FALSE	TRUE	FALSE	FALSE	.	0	0	chr4	40239527	40240088	element_276	4	chr4	40239199	40240200
chr4	40213571	40214572	-1	ENSMUSG00000040296	ENSMUST00000135966	Ddx58	FALSE	FALSE	FALSE	TRUE	.	0	0	.	0	0	.	.	chr4	40213571	40214572
chr4	40227855	40228856	-1	ENSMUSG00000040296	ENSMUST00000139110	Ddx58	FALSE	FALSE	FALSE	TRUE	.	0	0	.	0	0	.	.	chr4	40227855	40228856
chr4	40239254	40240255	-1	ENSMUSG00000040296	ENSMUST00000139583	Ddx58	FALSE	TRUE	FALSE	FALSE	.	0	0	chr4	40239527	40240088	element_276	4	chr4	40239254	40240255
chr4	40208294	40209295	-1	ENSMUSG00000040296	ENSMUST00000140616	Ddx58	FALSE	FALSE	FALSE	TRUE	.	0	0	.	0	0	.	.	chr4	40208294	40209295
chr4	63860846	63861847	-1	ENSMUSG00000028362	ENSMUST00000030047	Tnfsf8	FALSE	FALSE	FALSE	TRUE	.	0	0	.	0	0	.	.	chr4	63860846	63861847
chr4	6453754	6454755	-1	ENSMUSG00000028245	ENSMUST00000143566	Nsmaf	FALSE	FALSE	FALSE	TRUE	.	0	0	.	0	0	.	.	chr4	6453754	6454755
chr4	6432197	6433198	-1	ENSMUSG00000028245	ENSMUST00000143983	Nsmaf	FALSE	FALSE	FALSE	TRUE	.	0	0	.	0	0	.	.	chr4	6432197	6433198
chr4	6443892	6444893	-1	ENSMUSG00000028245	ENSMUST00000124656	Nsmaf	FALSE	FALSE	FALSE	TRUE	.	0	0	.	0	0	.	.	chr4	6443892	6444893
chr4	6453770	6454771	-1	ENSMUSG00000028245	ENSMUST00000029910	Nsmaf	FALSE	FALSE	FALSE	TRUE	.	0	0	.	0	0	.	.	chr4	6453770	6454771
chr4	6423487	6424488	-1	ENSMUSG00000028245	ENSMUST00000156078	Nsmaf	FALSE	FALSE	FALSE	TRUE	.	0	0	.	0	0	.	.	chr4	6423487	6424488
chr4	6398505	6399506	-1	ENSMUSG00000028245	ENSMUST00000149015	Nsmaf	FALSE	FALSE	FALSE	TRUE	.	0	0	.	0	0	.	.	chr4	6398505	6399506
chr4	6453595	6454596	-1	ENSMUSG00000028245	ENSMUST00000156715	Nsmaf	FALSE	FALSE	FALSE	TRUE	.	0	0	.	0	0	.	.	chr4	6453595	6454596
chr4	6453596	6454597	-1	ENSMUSG00000028245	ENSMUST00000124344	Nsmaf	FALSE	FALSE	FALSE	TRUE	.	0	0	.	0	0	.	.	chr4	6453596	6454597
chr4	6445826	6446827	-1	ENSMUSG00000028245	ENSMUST00000145399	Nsmaf	FALSE	FALSE	FALSE	TRUE	.	0	0	.	0	0	.	.	chr4	6445826	6446827
chr4	6453078	6454079	-1	ENSMUSG00000028245	ENSMUST00000156283	Nsmaf	FALSE	FALSE	FALSE	TRUE	.	0	0	.	0	0	.	.	chr4	6453078	6454079
chr4	6453770	6454771	-1	ENSMUSG00000028245	ENSMUST00000143704	Nsmaf	FALSE	FALSE	FALSE	TRUE	.	0	0	.	0	0	.	.	chr4	6453770	6454771
chr4	135272313	135273314	-1	ENSMUSG00000037242	ENSMUST00000143370	Clic4	FALSE	FALSE	FALSE	TRUE	.	0	0	.	0	0	.	.	chr4	135272313	135273314
chr4	135272313	135273314	-1	ENSMUSG00000037242	ENSMUST00000037099	Clic4	FALSE	FALSE	FALSE	TRUE	.	0	0	.	0	0	.	.	chr4	135272313	135273314
chr5	24685324	24686325	1	ENSMUSG00000028954	ENSMUST00000068825	Nub1	FALSE	FALSE	FALSE	TRUE	.	0	0	.	0	0	.	.	chr5	24685324	24686325
chr5	24685032	24686033	1	ENSMUSG00000028954	ENSMUST00000197407	Nub1	FALSE	FALSE	FALSE	TRUE	.	0	0	.	0	0	.	.	chr5	24685032	24686033
chr5	24685487	24686488	1	ENSMUSG00000028954	ENSMUST00000200337	Nub1	FALSE	FALSE	FALSE	TRUE	.	0	0	.	0	0	.	.	chr5	24685487	24686488
chr5	120812135	120813136	1	ENSMUSG00000029605	ENSMUST00000086377	Oas1b	FALSE	TRUE	FALSE	FALSE	.	0	0	chr5	120812373	120812957	element_293	1	chr5	120812135	120813136
chr5	120812135	120813136	1	ENSMUSG00000029605	ENSMUST00000182725	Oas1b	FALSE	TRUE	FALSE	FALSE	.	0	0	chr5	120812373	120812957	element_293	1	chr5	120812135	120813136
chr5	120812138	120813139	1	ENSMUSG00000029605	ENSMUST00000183291	Oas1b	FALSE	TRUE	FALSE	FALSE	.	0	0	chr5	120812373	120812957	element_293	1	chr5	120812138	120813139
chr5	101806048	101807049	1	ENSMUSG00000029330	ENSMUST00000132213	Cds1	FALSE	FALSE	FALSE	TRUE	.	0	0	.	0	0	.	.	chr5	101806048	101807049
chr5	101764630	101765631	1	ENSMUSG00000029330	ENSMUST00000031273	Cds1	FALSE	FALSE	FALSE	TRUE	.	0	0	.	0	0	.	.	chr5	101764630	101765631
chr5	117133088	117134089	1	ENSMUSG00000061288	ENSMUST00000128720	Taok3	FALSE	FALSE	FALSE	TRUE	.	0	0	.	0	0	.	.	chr5	117133088	117134089
chr5	117239960	117240961	1	ENSMUSG00000061288	ENSMUST00000111975	Taok3	FALSE	FALSE	FALSE	TRUE	.	0	0	.	0	0	.	.	chr5	117239960	117240961
chr5	117133088	117134089	1	ENSMUSG00000061288	ENSMUST00000179276	Taok3	FALSE	FALSE	FALSE	TRUE	.	0	0	.	0	0	.	.	chr5	117133088	117134089
chr5	117133095	117134096	1	ENSMUSG00000061288	ENSMUST00000092889	Taok3	FALSE	FALSE	FALSE	TRUE	.	0	0	.	0	0	.	.	chr5	117133095	117134096
chr5	117125801	117126802	1	ENSMUSG00000061288	ENSMUST00000125738	Taok3	FALSE	FALSE	FALSE	TRUE	.	0	0	.	0	0	.	.	chr5	117125801	117126802
chr5	117202765	117203766	1	ENSMUSG00000061288	ENSMUST00000127814	Taok3	FALSE	FALSE	FALSE	TRUE	.	0	0	.	0	0	.	.	chr5	117202765	117203766
chr5	117119629	117120630	1	ENSMUSG00000061288	ENSMUST00000111978	Taok3	FALSE	FALSE	FALSE	TRUE	.	0	0	.	0	0	.	.	chr5	117119629	117120630
chr5	117133141	117134142	1	ENSMUSG00000061288	ENSMUST00000153709	Taok3	FALSE	FALSE	FALSE	TRUE	.	0	0	.	0	0	.	.	chr5	117133141	117134142
chr5	117133118	117134119	1	ENSMUSG00000061288	ENSMUST00000145640	Taok3	FALSE	FALSE	FALSE	TRUE	.	0	0	.	0	0	.	.	chr5	117133118	117134119
chr5	117133115	117134116	1	ENSMUSG00000061288	ENSMUST00000126813	Taok3	FALSE	FALSE	FALSE	TRUE	.	0	0	.	0	0	.	.	chr5	117133115	117134116
chr5	21372142	21373143	1	ENSMUSG00000039899	ENSMUST00000035799	Fgl2	FALSE	FALSE	FALSE	TRUE	.	0	0	.	0	0	.	.	chr5	21372142	21373143
chr5	9112748	9113749	1	ENSMUSG00000079659	ENSMUST00000198935	Tmem243	FALSE	FALSE	FALSE	TRUE	.	0	0	.	0	0	.	.	chr5	9112748	9113749
chr5	9155233	9156234	1	ENSMUSG00000079659	ENSMUST00000200542	Tmem243	FALSE	FALSE	FALSE	TRUE	.	0	0	.	0	0	.	.	chr5	9155233	9156234
chr5	9100247	9101248	1	ENSMUSG00000079659	ENSMUST00000115365	Tmem243	FALSE	FALSE	FALSE	TRUE	.	0	0	.	0	0	.	.	chr5	9100247	9101248
chr5	9100168	9101169	1	ENSMUSG00000079659	ENSMUST00000196029	Tmem243	FALSE	FALSE	FALSE	TRUE	.	0	0	.	0	0	.	.	chr5	9100168	9101169
chr5	114896530	114897531	1	ENSMUSG00000029561	ENSMUST00000150361	Oasl2	FALSE	TRUE	FALSE	FALSE	.	0	0	chr5	114897219	114897770	element_290	3	chr5	114896530	114897531
chr5	114897076	114898077	1	ENSMUSG00000029561	ENSMUST00000137828	Oasl2	FALSE	TRUE	FALSE	FALSE	.	0	0	chr5	114897219	114897770	element_290	3	chr5	114897076	114898077
chr5	114901334	114902335	1	ENSMUSG00000029561	ENSMUST00000201445	Oasl2	FALSE	FALSE	FALSE	TRUE	.	0	0	.	0	0	.	.	chr5	114901334	114902335
chr5	114903930	114904931	1	ENSMUSG00000029561	ENSMUST00000129707	Oasl2	FALSE	FALSE	FALSE	TRUE	.	0	0	.	0	0	.	.	chr5	114903930	114904931
chr5	114897032	114898033	1	ENSMUSG00000029561	ENSMUST00000201919	Oasl2	FALSE	TRUE	FALSE	FALSE	.	0	0	chr5	114897219	114897770	element_290	3	chr5	114897032	114898033
chr5	114896436	114897437	1	ENSMUSG00000029561	ENSMUST00000031542	Oasl2	FALSE	TRUE	FALSE	FALSE	.	0	0	chr5	114897219	114897770	element_290	3	chr5	114896436	114897437
chr5	114897242	114898243	1	ENSMUSG00000029561	ENSMUST00000144064	Oasl2	FALSE	TRUE	FALSE	FALSE	.	0	0	chr5	114897219	114897770	element_290	3	chr5	114897242	114898243
chr5	114900853	114901854	1	ENSMUSG00000029561	ENSMUST00000124716	Oasl2	FALSE	FALSE	FALSE	TRUE	.	0	0	.	0	0	.	.	chr5	114900853	114901854
chr5	114896501	114897502	1	ENSMUSG00000029561	ENSMUST00000146072	Oasl2	FALSE	TRUE	FALSE	FALSE	.	0	0	chr5	114897219	114897770	element_290	3	chr5	114896501	114897502
chr5	114922764	114923765	1	ENSMUSG00000041827	ENSMUST00000112143	Oasl1	FALSE	FALSE	FALSE	TRUE	.	0	0	.	0	0	.	.	chr5	114922764	114923765
chr5	114929349	114930350	1	ENSMUSG00000041827	ENSMUST00000152329	Oasl1	FALSE	FALSE	FALSE	TRUE	.	0	0	.	0	0	.	.	chr5	114929349	114930350
chr5	114922935	114923936	1	ENSMUSG00000041827	ENSMUST00000140159	Oasl1	FALSE	FALSE	FALSE	TRUE	.	0	0	.	0	0	.	.	chr5	114922935	114923936
chr5	114922922	114923923	1	ENSMUSG00000041827	ENSMUST00000155394	Oasl1	FALSE	FALSE	FALSE	TRUE	.	0	0	.	0	0	.	.	chr5	114922922	114923923
chr5	114935525	114936526	1	ENSMUSG00000041827	ENSMUST00000155274	Oasl1	FALSE	FALSE	FALSE	TRUE	.	0	0	.	0	0	.	.	chr5	114935525	114936526
chr5	114922740	114923741	1	ENSMUSG00000041827	ENSMUST00000031540	Oasl1	FALSE	FALSE	FALSE	TRUE	.	0	0	.	0	0	.	.	chr5	114922740	114923741
chr5	30012644	30013645	1	ENSMUSG00000025746	ENSMUST00000199183	Il6	FALSE	FALSE	FALSE	TRUE	.	0	0	.	0	0	.	.	chr5	30012644	30013645
chr5	30012668	30013669	1	ENSMUSG00000025746	ENSMUST00000195978	Il6	FALSE	FALSE	FALSE	TRUE	.	0	0	.	0	0	.	.	chr5	30012668	30013669
chr5	30012614	30013615	1	ENSMUSG00000025746	ENSMUST00000026845	Il6	FALSE	FALSE	FALSE	TRUE	.	0	0	.	0	0	.	.	chr5	30012614	30013615
chr5	30012821	30013822	1	ENSMUSG00000025746	ENSMUST00000199765	Il6	FALSE	FALSE	FALSE	TRUE	.	0	0	.	0	0	.	.	chr5	30012821	30013822
chr5	121384908	121385909	-1	ENSMUSG00000042726	ENSMUST00000152265	Trafd1	FALSE	FALSE	FALSE	TRUE	.	0	0	.	0	0	.	.	chr5	121384908	121385909
chr5	121372973	121373974	-1	ENSMUSG00000042726	ENSMUST00000202064	Trafd1	FALSE	FALSE	FALSE	TRUE	.	0	0	.	0	0	.	.	chr5	121372973	121373974
chr5	121385076	121386077	-1	ENSMUSG00000042726	ENSMUST00000155379	Trafd1	FALSE	FALSE	FALSE	TRUE	.	0	0	.	0	0	.	.	chr5	121385076	121386077
chr5	121385070	121386071	-1	ENSMUSG00000042726	ENSMUST00000120784	Trafd1	FALSE	FALSE	FALSE	TRUE	.	0	0	.	0	0	.	.	chr5	121385070	121386071
chr5	121384859	121385860	-1	ENSMUSG00000042726	ENSMUST00000126550	Trafd1	FALSE	FALSE	FALSE	TRUE	.	0	0	.	0	0	.	.	chr5	121384859	121385860
chr5	121378322	121379323	-1	ENSMUSG00000042726	ENSMUST00000156158	Trafd1	FALSE	FALSE	FALSE	TRUE	.	0	0	.	0	0	.	.	chr5	121378322	121379323
chr5	121372630	121373631	-1	ENSMUSG00000042726	ENSMUST00000133138	Trafd1	FALSE	FALSE	FALSE	TRUE	.	0	0	.	0	0	.	.	chr5	121372630	121373631
chr5	121385128	121386129	-1	ENSMUSG00000042726	ENSMUST00000146185	Trafd1	FALSE	FALSE	FALSE	TRUE	.	0	0	.	0	0	.	.	chr5	121385128	121386129
chr5	121385131	121386132	-1	ENSMUSG00000042726	ENSMUST00000042312	Trafd1	FALSE	FALSE	FALSE	TRUE	.	0	0	.	0	0	.	.	chr5	121385131	121386132
chr5	120812013	120813014	-1	ENSMUSG00000001166	ENSMUST00000117193	Oas1c	FALSE	TRUE	FALSE	FALSE	.	0	0	chr5	120812373	120812957	element_293	1	chr5	120812013	120813014
chr5	120812013	120813014	-1	ENSMUSG00000001166	ENSMUST00000130045	Oas1c	FALSE	TRUE	FALSE	FALSE	.	0	0	chr5	120812373	120812957	element_293	1	chr5	120812013	120813014
chr5	120811987	120812988	-1	ENSMUSG00000001166	ENSMUST00000125547	Oas1c	FALSE	TRUE	FALSE	FALSE	.	0	0	chr5	120812373	120812957	element_293	1	chr5	120811987	120812988
chr5	92348381	92349382	-1	ENSMUSG00000034855	ENSMUST00000138169	Cxcl10	FALSE	FALSE	FALSE	TRUE	.	0	0	.	0	0	.	.	chr5	92348381	92349382
chr5	92348388	92349389	-1	ENSMUSG00000034855	ENSMUST00000118006	Cxcl10	FALSE	FALSE	FALSE	TRUE	.	0	0	.	0	0	.	.	chr5	92348388	92349389
chr5	92348366	92349367	-1	ENSMUSG00000034855	ENSMUST00000201176	Cxcl10	FALSE	FALSE	FALSE	TRUE	.	0	0	.	0	0	.	.	chr5	92348366	92349367
chr5	92348381	92349382	-1	ENSMUSG00000034855	ENSMUST00000038816	Cxcl10	FALSE	FALSE	FALSE	TRUE	.	0	0	.	0	0	.	.	chr5	92348381	92349382
chr5	92362776	92363777	-1	ENSMUSG00000060183	ENSMUST00000077820	Cxcl11	FALSE	FALSE	FALSE	TRUE	.	0	0	.	0	0	.	.	chr5	92362776	92363777
chr5	92364984	92365985	-1	ENSMUSG00000060183	ENSMUST00000122808	Cxcl11	FALSE	FALSE	FALSE	TRUE	.	0	0	.	0	0	.	.	chr5	92364984	92365985
chr5	120887081	120888082	-1	ENSMUSG00000066861	ENSMUST00000086368	Oas1g	FALSE	FALSE	FALSE	TRUE	.	0	0	.	0	0	.	.	chr5	120887081	120888082
chr5	120879102	120880103	-1	ENSMUSG00000066861	ENSMUST00000161809	Oas1g	FALSE	FALSE	FALSE	TRUE	.	0	0	.	0	0	.	.	chr5	120879102	120880103
chr5	120887112	120888113	-1	ENSMUSG00000066861	ENSMUST00000162096	Oas1g	FALSE	FALSE	FALSE	TRUE	.	0	0	.	0	0	.	.	chr5	120887112	120888113
chr5	120907020	120908021	-1	ENSMUSG00000052776	ENSMUST00000080322	Oas1a	FALSE	TRUE	FALSE	FALSE	.	0	0	chr5	120907360	120907782	element_295	2	chr5	120907020	120908021
chr5	100719215	100720216	-1	ENSMUSG00000035273	ENSMUST00000045617	Hpse	FALSE	FALSE	FALSE	TRUE	.	0	0	.	0	0	.	.	chr5	100719215	100720216
chr5	100719204	100720205	-1	ENSMUSG00000035273	ENSMUST00000112908	Hpse	FALSE	FALSE	FALSE	TRUE	.	0	0	.	0	0	.	.	chr5	100719204	100720205
chr5	91402493	91403494	-1	ENSMUSG00000082361	ENSMUST00000121044	Btc	FALSE	FALSE	FALSE	TRUE	.	0	0	.	0	0	.	.	chr5	91402493	91403494
chr5	91376520	91377521	-1	ENSMUSG00000082361	ENSMUST00000201090	Btc	FALSE	FALSE	FALSE	TRUE	.	0	0	.	0	0	.	.	chr5	91376520	91377521
chr5	91402359	91403360	-1	ENSMUSG00000082361	ENSMUST00000200860	Btc	FALSE	FALSE	FALSE	TRUE	.	0	0	.	0	0	.	.	chr5	91402359	91403360
chr5	91402321	91403322	-1	ENSMUSG00000082361	ENSMUST00000201252	Btc	FALSE	FALSE	FALSE	TRUE	.	0	0	.	0	0	.	.	chr5	91402321	91403322
chr5	105109775	105110776	-1	ENSMUSG00000029298	ENSMUST00000031238	Gbp9	FALSE	TRUE	FALSE	FALSE	.	0	0	chr5	105110231	105110518	element_286	2	chr5	105109775	105110776
chr5	105109776	105110777	-1	ENSMUSG00000029298	ENSMUST00000196820	Gbp9	FALSE	TRUE	FALSE	FALSE	.	0	0	chr5	105110231	105110518	element_286	2	chr5	105109776	105110777
chr5	105082262	105083263	-1	ENSMUSG00000029298	ENSMUST00000199453	Gbp9	FALSE	FALSE	FALSE	TRUE	.	0	0	.	0	0	.	.	chr5	105082262	105083263
chr5	105139038	105140039	-1	ENSMUSG00000029298	ENSMUST00000100961	Gbp9	FALSE	FALSE	FALSE	TRUE	.	0	0	.	0	0	.	.	chr5	105139038	105140039
chr5	105139085	105140086	-1	ENSMUSG00000079363	ENSMUST00000196204	Gbp4	FALSE	FALSE	FALSE	TRUE	.	0	0	.	0	0	.	.	chr5	105139085	105140086
chr5	105139043	105140044	-1	ENSMUSG00000079363	ENSMUST00000199629	Gbp4	FALSE	FALSE	FALSE	TRUE	.	0	0	.	0	0	.	.	chr5	105139043	105140044
chr5	105139085	105140086	-1	ENSMUSG00000079363	ENSMUST00000100962	Gbp4	FALSE	FALSE	FALSE	TRUE	.	0	0	.	0	0	.	.	chr5	105139085	105140086
chr5	105139050	105140051	-1	ENSMUSG00000079363	ENSMUST00000198278	Gbp4	FALSE	FALSE	FALSE	TRUE	.	0	0	.	0	0	.	.	chr5	105139050	105140051
chr5	105139039	105140040	-1	ENSMUSG00000079363	ENSMUST00000197799	Gbp4	FALSE	FALSE	FALSE	TRUE	.	0	0	.	0	0	.	.	chr5	105139039	105140040
chr5	105139044	105140045	-1	ENSMUSG00000079363	ENSMUST00000196677	Gbp4	FALSE	FALSE	FALSE	TRUE	.	0	0	.	0	0	.	.	chr5	105139044	105140045
chr5	67768616	67769617	-1	ENSMUSG00000037685	ENSMUST00000152433	Atp8a1	FALSE	FALSE	FALSE	TRUE	.	0	0	.	0	0	.	.	chr5	67768616	67769617
chr5	67814729	67815730	-1	ENSMUSG00000037685	ENSMUST00000130652	Atp8a1	FALSE	FALSE	FALSE	TRUE	.	0	0	.	0	0	.	.	chr5	67814729	67815730
chr5	67846928	67847929	-1	ENSMUSG00000037685	ENSMUST00000143013	Atp8a1	FALSE	FALSE	FALSE	TRUE	.	0	0	.	0	0	.	.	chr5	67846928	67847929
chr5	67815352	67816353	-1	ENSMUSG00000037685	ENSMUST00000141443	Atp8a1	FALSE	FALSE	FALSE	TRUE	.	0	0	.	0	0	.	.	chr5	67815352	67816353
chr5	67846930	67847931	-1	ENSMUSG00000037685	ENSMUST00000113651	Atp8a1	FALSE	FALSE	FALSE	TRUE	.	0	0	.	0	0	.	.	chr5	67846930	67847931
chr5	67808235	67809236	-1	ENSMUSG00000037685	ENSMUST00000202248	Atp8a1	FALSE	FALSE	FALSE	TRUE	.	0	0	.	0	0	.	.	chr5	67808235	67809236
chr5	67776258	67777259	-1	ENSMUSG00000037685	ENSMUST00000155911	Atp8a1	FALSE	FALSE	FALSE	TRUE	.	0	0	.	0	0	.	.	chr5	67776258	67777259
chr5	67846933	67847934	-1	ENSMUSG00000037685	ENSMUST00000037380	Atp8a1	FALSE	FALSE	FALSE	TRUE	.	0	0	.	0	0	.	.	chr5	67846933	67847934
chr5	67814738	67815739	-1	ENSMUSG00000037685	ENSMUST00000128726	Atp8a1	FALSE	FALSE	FALSE	TRUE	.	0	0	.	0	0	.	.	chr5	67814738	67815739
chr5	67846930	67847931	-1	ENSMUSG00000037685	ENSMUST00000072971	Atp8a1	FALSE	FALSE	FALSE	TRUE	.	0	0	.	0	0	.	.	chr5	67846930	67847931
chr5	67659533	67660534	-1	ENSMUSG00000037685	ENSMUST00000149501	Atp8a1	FALSE	FALSE	FALSE	TRUE	.	0	0	.	0	0	.	.	chr5	67659533	67660534
chr5	67846930	67847931	-1	ENSMUSG00000037685	ENSMUST00000113652	Atp8a1	FALSE	FALSE	FALSE	TRUE	.	0	0	.	0	0	.	.	chr5	67846930	67847931
chr5	67846794	67847795	-1	ENSMUSG00000037685	ENSMUST00000200955	Atp8a1	FALSE	FALSE	FALSE	TRUE	.	0	0	.	0	0	.	.	chr5	67846794	67847795
chr5	67846869	67847870	-1	ENSMUSG00000037685	ENSMUST00000135930	Atp8a1	FALSE	FALSE	FALSE	TRUE	.	0	0	.	0	0	.	.	chr5	67846869	67847870
chr5	103628902	103629903	-1	ENSMUSG00000029321	ENSMUST00000031263	Slc10a6	FALSE	FALSE	FALSE	TRUE	.	0	0	.	0	0	.	.	chr5	103628902	103629903
[truncated: 583 more rows]

## Sheet: ChomStat_S1-2_peaks_ESC
STAT1/2 peak			STAT1/2 peak region (2k)
[truncated: 393 more rows]

## Sheet: ChomStat_S1-2_peaks_MEF
STAT1/2 peak			STAT1/2 peak region (2k)
[truncated: 393 more rows]

[truncated: 2 more sheets: Link_to_enhancer_ESC, Link_to_enhancer_MEF]
