# Supplementary material for: Epigenetic signals that direct cell type–specific interferon beta response in mouse cells
Source: Life Sci Alliance. 2023 Feb 2;6(4):e202201823. doi: 10.26508/lsa.202201823 (PMC9900254; doi:10.26508/lsa.202201823)
Supplement: Supplementary file 14 [file LSA-2022-01823_TableS6.xlsx]

## Sheet: Table S6
	Supplementary Table S6. Overview of scATAC-seq data.
		ESC		MEF
	IFNβ treatment time	0 h	6 h	0 h		1 h		6 h
	Cell number	8925	5596	11656		12272		19403
	Fragments per cell (median)	16397	24512	12799		12095		4816
	Fraction fragments at targeted region (%)	65.3	65.8	68.1		64		68.5
				Minor cluster	Major cluster	Minor cluster	Major cluster	Minor cluster	Major cluster
	Sampled cell number	2700	2700	2700	2700	2700	2700	2700	2700
	Fragments per cell (median)	13443	20143	13452	13454	13463	13460	6557	10544
