# Supplementary material for: Epigenetic signals that direct cell type–specific interferon beta response in mouse cells
Source: Life Sci Alliance. 2023 Feb 2;6(4):e202201823. doi: 10.26508/lsa.202201823 (PMC9900254; doi:10.26508/lsa.202201823)
Supplement: Supplementary file 18 [file LSA-2022-01823_TableS7.xlsx]

## Sheet: Table S7
	Supplementary Table S7. Antibodies used in this study.
	Target	Company	Ref.	Species	ChIP-seq	Western blot
	H3K4me1	Abcam	ab8895	Rabbit	2 µg for 25 µg of chromatin	1:500
	H3K4me3	Abcam	ab8580	Rabbit	2 µg for 25µg of chromatin	1:1000
	H3K9ac	Active Motif	39137	Rabbit	10 µl per ChIP	1:1000
	H3K9me3	Abcam	ab8898	Rabbit	2-4 µg for 25 µg of chromatin	–
	H3K27ac	Abcam	ab4729	Rabbit	2 µg for 25 µg of chromatin	1:1000
	H3K27me3	Abcam	ab6002	Mouse	5-10 µg for 25 µg of chromatin	1:1000
	H3K27me3	Active Motif	39155	Rabbit	5 µg per ChIP	1:1000
	H3	Abcam	ab1791	Rabbit	2 µg for 106 cells	1:1000
	IgG rabbit	Acris	AB-105-C	Rabbit	2 µl
	STAT1	Cell Signaling	#9172	Rabbit	1:50	1:1000
	STAT1 p701	Cell Signaling	#7649	Rabbit	1:100	1:1000
	STAT1 p727	Cell Signaling	#8826	Rabbit	1:50	1:1000
	STAT2	Cell Signaling	#72604	Rabbit	1:50	1:1000
	IgG Rb	Cell Signaling	#2729	Rabbit	2 µl (1 µg/µl)	–
