# Supplementary material for: Epigenetic signals that direct cell type–specific interferon beta response in mouse cells
Source: Life Sci Alliance. 2023 Feb 2;6(4):e202201823. doi: 10.26508/lsa.202201823 (PMC9900254; doi:10.26508/lsa.202201823)
Supplement: Supplementary file 19 [file LSA-2022-01823_TableS8.xlsx]

## Sheet: Table S8
	Supplementary Table S8. Data analysis software.
	Software	Referencea	Link	Version
	ArchR	Granja et al 2021	github.com/GreenleafLab/ArchR	1.0.1
	bedtools	Quinlan & Hall 2010	bedtools.readthedocs.io/en/latest/	2.27.1
	Bioconductor	Gentleman et al 2004	www.bioconductor.org	3.10
	Bowtie2	Langmead & Salzberg 2012	bowtie-bio.sourceforge.net/bowtie2/index.shtml	2.3.3
	Cell Ranger scATAC	Satpathy et al 2019	support.10xgenomics.com/single-cell-atac/software/pipelines/latest/what-is-cell-ranger-atac	1.1.0
	Cell Ranger scRNA	Zheng et al 2017	support.10xgenomics.com/single-cell-gene-expression/software/pipelines/latest/what-is-cell-ranger	3.0.2
	DAVID	Huang da et al 2009	david.ncifcrf.gov	6.8
	DESeq2	Love et al 2014	doi.org/10.18129/B9.bioc.DESeq2	1.24.0
	DiffBind	Ross-Innes et al 2012	doi.org/10.18129/B9.bioc.DiffBind	2.12.0
	DSS	Wu et al 2013	doi.org/10.18129/B9.bioc.DSS	2.38.0
	Enriched Heatmap	Gu et al 2018	doi.org/10.18129/B9.bioc.EnrichedHeatmap	3.12
	GenomicRanges	Lawrence et al 2013	doi.org/10.18129/B9.bioc.GenomicRanges	1.36.4
	gProfileR	Reimand et al 2016	biit.cs.ut.ee/gprofiler/	0.2.0
	GREAT	McLean et al 2010	bejerano.stanford.edu/great/public/html/index.php	4.0.4
	HOMER	Heinz et al 2010	homer.ucsd.edu/homer/	4.9
	HTSeq	Anders et al 2015	htseq.readthedocs.io/en/master/	0.12.4
	Integrative Genom­ics Viewer (IGV)	Robinson et al 2011	software.broadinstitute.org/software/igv/	2.3.23
	MACS2	Feng et al 2012, Zhang et al 2008	github.com/taoliu/MACS	2.1.2
	R software package	R Core Team 2020	www.r-project.org	3.6.3, 4.0.2
	REVIGO	Supek et al 2011	http://revigo.irb.hr/	n. a.
	RSEM	Li & Dewey 2011	https://github.com/deweylab/RSEM	1.3.0
	RWire	Mallm et al 2019	https://github.com/RippeLab/RWire-IFN	n. a.
	SAMtools	Li et al 2009	http://samtools.sourceforge.net/	1.3
	SICER	Xu et al 2014	https://github.com/dariober/SICERpy	0.1.1
	SortMeRNA	Kopylova et al 2012	https://bioinfo.lifl.fr/RNA/sortmerna/	2.1
	STAR	Dobin et al 2013	github.com/alexdobin/STAR	2.5.3a
	Trimmomatic	Bolger et al 2014	www.usadellab.org/cms/?page=trimmomatic	0.36
	Seurat	Stuart et al 2019	satijalab.org/seurat/	4.0.1
	Venny	n. a.	bioinfogp.cnb.csic.es/tools/venny	2.1
	a See list of references in the main text
